# Supplementary material for: AI-Driven Drug Discovery for Breast Cancer Based on ERBB2 Identified Through Network Pharmacology and GEO Data Analysis
Source: Research Square preprint supplement (doi:10.21203/rs.3.rs-6047847/v1), 2025-02-26
Supplement: Supplementary file 1 [file 021b62935d5a12cf5d01517f.xlsx]

## Sheet: 1260compounds
S10. Compounds after excluding PAINS structure
molecule_chembl_id	IC50	units	smiles	pIC50	ro5_fulfilled	ROMol
CHEMBL941	0.06	nM	Cc1ccc(NC(=O)c2ccc(CN3CCN(C)CC3)cc2)cc1Nc1nccc(-c2cccnc2)n1	10.2218	TRUE	<rdkit.Chem.rdchem.Mol object at 0x7facdef7a430>
CHEMBL5221067	0.14	nM	N#Cc1c(NC(=O)CNc2n[nH]c3ncccc23)sc2c1CCCC2	9.85387	TRUE	<rdkit.Chem.rdchem.Mol object at 0x7facdef7a2e0>
CHEMBL437890	0.5	nM	CN1CCN(CCC#CC(=O)Nc2cc3c(Nc4ccc(F)c(Br)c4)ncnc3cn2)CC1	9.30103	TRUE	<rdkit.Chem.rdchem.Mol object at 0x7facdef7a350>
CHEMBL203599	0.7	nM	CN1CCN(CCC#CC(=O)Nc2cc3c(Nc4ccc(F)c(Cl)c4)ncnc3cn2)CC1	9.1549	TRUE	<rdkit.Chem.rdchem.Mol object at 0x7facdef7a5f0>
CHEMBL204638	0.7	nM	O=C(C#CCCN1CCOCC1)Nc1cc2c(Nc3ccc(F)c(Br)c3)ncnc2cn1	9.1549	TRUE	<rdkit.Chem.rdchem.Mol object at 0x7facdef7a740>
CHEMBL203661	0.8	nM	O=C(C#CCCN1CCOCC1)Nc1cc2c(Nc3ccc(F)c(Cl)c3)ncnc2cn1	9.09691	TRUE	<rdkit.Chem.rdchem.Mol object at 0x7facdef7a7b0>
CHEMBL258282	1	nM	CN1CCN(CCOc2n[nH]c3ncnc(Nc4ccc(OCc5ccccn5)c(Cl)c4)c23)CC1	9	TRUE	<rdkit.Chem.rdchem.Mol object at 0x7facdef7a820>
CHEMBL4067871	1	nM	OC[C@H](Nc1cnc(-c2cc(Cl)ccc2O)c(-c2ccc3cnccc3c2)c1)c1ccccc1	9	TRUE	<rdkit.Chem.rdchem.Mol object at 0x7facdef7a890>
CHEMBL4105329	1	nM	Cc1n[nH]c2ccc(-c3cc(N[C@@H](CO)c4ccccc4)cnc3-c3cc(Cl)ccc3O)cc12	9	TRUE	<rdkit.Chem.rdchem.Mol object at 0x7facdef7a900>
CHEMBL4075917	1	nM	Cc1n[nH]c2ccc(-c3cc(N[C@@H](CO)c4ccccc4)cnc3-c3ccc(F)cc3O)cc12	9	TRUE	<rdkit.Chem.rdchem.Mol object at 0x7facdef7a970>
CHEMBL483332	1	nM	C[C@H](CN(C)C)Oc1cccc2ncnc(Nc3ccc(OCc4cnccn4)c(Cl)c3)c12	9	TRUE	<rdkit.Chem.rdchem.Mol object at 0x7facdef7a9e0>
CHEMBL5176920	1.06	nM	Cc1cc(Nc2ncnc3cc(O)c(NC(=O)/C=C/[C@H]4CCCN4C)cc23)ccc1Oc1cc2nccn2cn1	8.97469	TRUE	<rdkit.Chem.rdchem.Mol object at 0x7facdef7aa50>
CHEMBL203644	1.1	nM	CC#CC(=O)Nc1cc2c(Nc3ccc(F)c(Cl)c3)ncnc2cn1	8.95861	TRUE	<rdkit.Chem.rdchem.Mol object at 0x7facdef7aac0>
CHEMBL54091	1.1	nM	C=CC(=O)Nc1cc2c(Nc3ccc(F)c(Br)c3)ncnc2cn1	8.95861	TRUE	<rdkit.Chem.rdchem.Mol object at 0x7facdef7ab30>
CHEMBL2048789	1.3	nM	O=C1NCc2ccc(Oc3ccc(Nc4ncnc5ccn(CCO)c45)cc3Cl)cc21	8.88606	TRUE	<rdkit.Chem.rdchem.Mol object at 0x7facdef7aba0>
CHEMBL5179954	1.4	nM	Cc1cc(Nc2ncnc3ccc(NC(=O)/C=C/[C@H]4CCCN4C)cc23)ccc1Oc1cc2nncn2cn1	8.85387	TRUE	<rdkit.Chem.rdchem.Mol object at 0x7facdef7ac10>
CHEMBL5288888	1.42	nM	C=CC(=O)N1CCC(Oc2cc3c(Nc4cccc(Cl)c4F)ncnc3cc2O[C@H]2CCOC2)CC1	8.84771	TRUE	<rdkit.Chem.rdchem.Mol object at 0x7facdef7ac80>
CHEMBL5193451	1.43	nM	Cc1cc(Nc2ncnc3cc(O)c(NC(=O)/C=C/[C@H]4CCCN4C)cc23)ccc1Oc1ccn2ncnc2c1	8.84466	TRUE	<rdkit.Chem.rdchem.Mol object at 0x7facdef7acf0>
CHEMBL2048795	1.5	nM	O=C1Cc2cccc(Oc3ccc(Nc4ncnc5ccn(CCO)c45)cc3Cl)c2N1	8.82391	TRUE	<rdkit.Chem.rdchem.Mol object at 0x7facdef7ad60>
CHEMBL2048906	1.6	nM	CC(=O)NCCn1ccc2ncnc(Nc3ccc(Oc4cccc5sncc45)c(Cl)c3)c21	8.79588	TRUE	<rdkit.Chem.rdchem.Mol object at 0x7facdef7add0>
CHEMBL2048796	1.6	nM	O=C1Cc2c(cccc2Oc2ccc(Nc3ncnc4ccn(CCO)c34)cc2Cl)N1	8.79588	TRUE	<rdkit.Chem.rdchem.Mol object at 0x7facdef7ae40>
CHEMBL2048903	1.7	nM	OCCn1ccc2ncnc(Nc3ccc(Oc4cccc5[nH]ncc45)c(Cl)c3)c21	8.76955	TRUE	<rdkit.Chem.rdchem.Mol object at 0x7facdef7aeb0>
CHEMBL202360	1.9	nM	C#CC(=O)Nc1ccc2ncnc(Nc3cccc(Br)c3)c2c1	8.72125	TRUE	<rdkit.Chem.rdchem.Mol object at 0x7facdef7af20>
CHEMBL5175489	1.93	nM	C=CC(=O)Nc1cc2c(Nc3ccc(Oc4cc5nncn5cn4)c(C)c3)ncnc2cc1OCC	8.71444	TRUE	<rdkit.Chem.rdchem.Mol object at 0x7facdef7af90>
CHEMBL1173655	2	nM	CN(C)C/C=C/C(=O)Nc1cc2c(Nc3ccc(F)c(Cl)c3)ncnc2cc1O[C@H]1CCOC1	8.69897	TRUE	<rdkit.Chem.rdchem.Mol object at 0x7facdf653040>
CHEMBL2103842	2	nM	C[C@@H]1COC(Nc2ccc3ncnc(Nc4ccc(OCc5nccs5)c(Cl)c4)c3c2)=N1	8.69897	TRUE	<rdkit.Chem.rdchem.Mol object at 0x7facdf6530b0>
CHEMBL402553	2	nM	Clc1cc(Nc2ncnc3[nH]nc(OCCN4CCCC4)c23)ccc1OCc1ccccn1	8.69897	TRUE	<rdkit.Chem.rdchem.Mol object at 0x7facdf653120>
CHEMBL3968417	2	nM	CN(C)C/C=C/C(=O)Nc1cc2c(Nc3ccc(F)c(Cl)c3)ncnc2cn1	8.69897	TRUE	<rdkit.Chem.rdchem.Mol object at 0x7facdf653190>
CHEMBL497459	2	nM	CN(C)/N=C/c1c(N)ncnc1Nc1ccc2c(cnn2Cc2cccc(F)c2)c1	8.69897	TRUE	<rdkit.Chem.rdchem.Mol object at 0x7facdf653200>
CHEMBL403569	2	nM	O=C(CO)N1CCC[C@H]1COc1cccc2ncnc(Nc3ccc(OCc4ccccn4)c(Cl)c3)c12	8.69897	TRUE	<rdkit.Chem.rdchem.Mol object at 0x7facdf653270>
CHEMBL518750	2	nM	CC(C)(Oc1cccc2ncnc(Nc3ccc(OCc4ccccn4)c(Cl)c3)c12)C(N)=O	8.69897	TRUE	<rdkit.Chem.rdchem.Mol object at 0x7facdf6532e0>
CHEMBL4522240	2.1	nM	COc1cc2ncnc(Nc3ccc(OCc4cccc(F)c4)c(Cl)c3)c2cc1OCCCN1CCNCCNCCNCC1	8.67778	TRUE	<rdkit.Chem.rdchem.Mol object at 0x7facdf653350>
CHEMBL2048905	2.1	nM	OCCn1ccc2ncnc(Nc3ccc(Oc4cccc5sncc45)c(Cl)c3)c21	8.67778	TRUE	<rdkit.Chem.rdchem.Mol object at 0x7facdf6533c0>
CHEMBL202411	2.1	nM	O=C(C#CCO)Nc1ccc2ncnc(Nc3ccc(F)c(Cl)c3)c2c1	8.67778	TRUE	<rdkit.Chem.rdchem.Mol object at 0x7facdf653430>
CHEMBL205059	2.1	nM	O=C(C#CCCN1CCCCC1)Nc1cc2c(Nc3ccc(F)c(Cl)c3)ncnc2cn1	8.67778	TRUE	<rdkit.Chem.rdchem.Mol object at 0x7facdf6534a0>
CHEMBL1923009	2.1	nM	OCCOCCn1ccc2ncnc(Nc3ccc(Oc4cccc(Cl)c4)c(Cl)c3)c21	8.67778	TRUE	<rdkit.Chem.rdchem.Mol object at 0x7facdf653510>
CHEMBL2048904	2.1	nM	Cn1ncc2c(Oc3ccc(Nc4ncnc5ccn(CCO)c45)cc3Cl)cccc21	8.67778	TRUE	<rdkit.Chem.rdchem.Mol object at 0x7facdf653580>
CHEMBL204085	2.3	nM	O=C(C#CCCN1CCOCC1)Nc1ccc2ncnc(Nc3ccc(F)c(Cl)c3)c2c1	8.63827	TRUE	<rdkit.Chem.rdchem.Mol object at 0x7facdf6535f0>
CHEMBL2048788	2.3	nM	CC(C)(C)NC(=O)c1cccc(Oc2ccc(Nc3ncnc4ccn(CCO)c34)cc2Cl)c1	8.63827	TRUE	<rdkit.Chem.rdchem.Mol object at 0x7facdf653660>
CHEMBL378144	2.4	nM	C#CC(=O)Nc1cc2c(Nc3cccc(Br)c3)ncnc2cn1	8.61979	TRUE	<rdkit.Chem.rdchem.Mol object at 0x7facdf6536d0>
CHEMBL5190132	2.41	nM	Cc1cc(Nc2ncnc3cc(O)c(NC(=O)/C=C/[C@H]4CCCN4C)cc23)ccc1Oc1cnc2ccnn2c1	8.61798	TRUE	<rdkit.Chem.rdchem.Mol object at 0x7facdf653740>
CHEMBL2048794	2.5	nM	O=C1NCc2cccc(Oc3ccc(Nc4ncnc5ccn(CCO)c45)cc3Cl)c21	8.60206	TRUE	<rdkit.Chem.rdchem.Mol object at 0x7facdf6537b0>
CHEMBL2048797	2.5	nM	OCCn1ccc2ncnc(Nc3ccc(Oc4cccc5[nH]ccc45)c(Cl)c3)c21	8.60206	TRUE	<rdkit.Chem.rdchem.Mol object at 0x7facdf653820>
CHEMBL5203179	2.55	nM	COCC(=O)NC/C=C/c1ccc2ncnc(Nc3ccc(Oc4cc5nncn5cn4)c(C)c3)c2c1	8.59346	TRUE	<rdkit.Chem.rdchem.Mol object at 0x7facdf653890>
CHEMBL382073	2.6	nM	CCN(CC)CCC#CC(=O)Nc1ccc2ncnc(Nc3ccc(F)c(Cl)c3)c2c1	8.58503	TRUE	<rdkit.Chem.rdchem.Mol object at 0x7facdf653900>
CHEMBL380669	2.8	nM	CC(C)N(CC#CC(=O)Nc1ccc2ncnc(Nc3ccc(F)c(Cl)c3)c2c1)C(C)C	8.55284	TRUE	<rdkit.Chem.rdchem.Mol object at 0x7facdf653970>
CHEMBL1923022	2.8	nM	CS(=O)(=O)O.O=C(CCO)NCCn1ccc2ncnc(Nc3ccc(Oc4cccc(C(F)(F)F)c4)c(Cl)c3)c21	8.55284	TRUE	<rdkit.Chem.rdchem.Mol object at 0x7facdf6539e0>
CHEMBL5175873	2.85	nM	Cc1cc(Nc2ncnc3ccc(NC(=O)/C=C/CN(C)C)cc23)ccc1Oc1cc2nncn2cn1	8.54516	TRUE	<rdkit.Chem.rdchem.Mol object at 0x7facdf653a50>
CHEMBL2148050	2.9	nM	CS(=O)(=O)CC(=O)NCCn1ccc2ncnc(Nc3ccc(Oc4cccc(Cl)c4)c(Cl)c3)c21	8.5376	TRUE	<rdkit.Chem.rdchem.Mol object at 0x7facdf653ac0>
CHEMBL2408045	3	nM	CNC(=O)CN1CCC(Oc2cc3c(Nc4cccc(Cl)c4F)ncnc3cc2OC)CC1	8.52288	TRUE	<rdkit.Chem.rdchem.Mol object at 0x7facdf653b30>
CHEMBL255135	3	nM	CNCCOc1n[nH]c2ncnc(Nc3ccc(OCc4ccccn4)c(Cl)c3)c12	8.52288	TRUE	<rdkit.Chem.rdchem.Mol object at 0x7facdf653ba0>
CHEMBL53555	3	nM	C=CC(=O)Nc1cc2c(Nc3ccc(F)c(Cl)c3)ncnc2cn1	8.52288	TRUE	<rdkit.Chem.rdchem.Mol object at 0x7facdf653c10>
CHEMBL257430	3	nM	Clc1cc(Nc2ncnc3[nH]nc(OCCN4CCNCC4)c23)ccc1OCc1ccccn1	8.52288	TRUE	<rdkit.Chem.rdchem.Mol object at 0x7facdf653c80>
CHEMBL402339	3	nM	COc1cc(Nc2ncnc3[nH]nc(OCCN4CCC(O)CC4)c23)ccc1OCc1cccc(F)c1	8.52288	TRUE	<rdkit.Chem.rdchem.Mol object at 0x7facdf653cf0>
CHEMBL1923003	3.3	nM	Cn1ccc2ncnc(Nc3ccc(Oc4cccc(Cl)c4)c(Cl)c3)c21	8.48149	TRUE	<rdkit.Chem.rdchem.Mol object at 0x7facdf653d60>
CHEMBL5182567	3.5	nM	C=CC(=O)Nc1ccc2ncnc(Nc3ccc4[nH]cc(Br)c4c3)c2c1	8.45593	TRUE	<rdkit.Chem.rdchem.Mol object at 0x7facdf653dd0>
CHEMBL4755170	3.5	nM	C=CC(=O)Nc1cccc(-c2c[nH]c3ncnc(Nc4ccc5[nH]c(Cc6ccccc6)nc5c4)c23)c1	8.45593	TRUE	<rdkit.Chem.rdchem.Mol object at 0x7facdf653e40>
CHEMBL572091	3.8	nM	CN1C[C@@H](OC(=O)N2CC=CC2)C[C@H](C(=O)NO)[C@H]1C(=O)N1CCN(c2ccccc2)CC1	8.42022	TRUE	<rdkit.Chem.rdchem.Mol object at 0x7facdf653eb0>
CHEMBL203645	3.8	nM	CCCC#CC(=O)Nc1cc2c(Nc3ccc(F)c(Cl)c3)ncnc2cn1	8.42022	TRUE	<rdkit.Chem.rdchem.Mol object at 0x7facdf653f20>
CHEMBL566233	3.8	nM	O=C(NO)[C@H]1C[C@H](OC(=O)N2CCCC2)CN[C@@H]1C(=O)N1CCN(c2ccccc2)CC1	8.42022	TRUE	<rdkit.Chem.rdchem.Mol object at 0x7facdf653f90>
CHEMBL51659	3.9	nM	C=CC(=O)Nc1cc2c(Nc3cccc(Br)c3)ncnc2cn1	8.40894	TRUE	<rdkit.Chem.rdchem.Mol object at 0x7facdf63c040>
CHEMBL3959248	4	nM	COCCOc1cc2ncnc(Nc3ccc4c(cnn4Cc4ccccc4)c3)c2cc1NC(=O)/C=C/CN(C)C	8.39794	TRUE	<rdkit.Chem.rdchem.Mol object at 0x7facdf63c0b0>
CHEMBL1645473	4	nM	NC1CCN(Cc2ccn3ncnc(Nc4cccc(Cl)c4)c23)CC1	8.39794	TRUE	<rdkit.Chem.rdchem.Mol object at 0x7facdf63c120>
CHEMBL411897	4	nM	COC1CCN(CCOc2n[nH]c3ncnc(Nc4ccc(OCc5ccccn5)c(Cl)c4)c23)CC1	8.39794	TRUE	<rdkit.Chem.rdchem.Mol object at 0x7facdf63c190>
CHEMBL257861	4	nM	OCCOc1n[nH]c2ncnc(Nc3ccc(OCc4ccccn4)c(Cl)c3)c12	8.39794	TRUE	<rdkit.Chem.rdchem.Mol object at 0x7facdf63c200>
CHEMBL272935	4	nM	CN1CCN(CCCOc2n[nH]c3ncnc(Nc4ccc(OCc5ccccn5)c(Cl)c4)c23)CC1	8.39794	TRUE	<rdkit.Chem.rdchem.Mol object at 0x7facdf63c270>
CHEMBL479171	4	nM	OCc1ccc(-c2cc3c(Nc4ccc(OCc5ccccc5)cc4)ncnc3cn2)o1	8.39794	TRUE	<rdkit.Chem.rdchem.Mol object at 0x7facdf63c2e0>
CHEMBL249928	4	nM	CN(CCOc1cccc2ncnc(Nc3ccc(OCc4ccccn4)c(Cl)c3)c12)C(=O)CO	8.39794	TRUE	<rdkit.Chem.rdchem.Mol object at 0x7facdf63c350>
CHEMBL1080506	4	nM	Cc1c(C(=O)NCCN2CCOCC2)[nH]c2cnnc(Nc3ccc(OCc4cccc(F)c4)c(Cl)c3)c12	8.39794	TRUE	<rdkit.Chem.rdchem.Mol object at 0x7facdf63c3c0>
CHEMBL1645474	4	nM	NC1CCN(Cc2ccn3ncnc(Nc4cccc(Br)c4)c23)CC1	8.39794	TRUE	<rdkit.Chem.rdchem.Mol object at 0x7facdf63c430>
CHEMBL5183924	4.05	nM	C=C(F)C(=O)Nc1cc2c(Nc3ccc(Oc4cc5nncn5cn4)c(C)c3)ncnc2cc1OCC	8.39254	TRUE	<rdkit.Chem.rdchem.Mol object at 0x7facdf63c4a0>
CHEMBL2148051	4.1	nM	CC(C(=O)NCCn1ccc2ncnc(Nc3ccc(Oc4cccc(Cl)c4)c(Cl)c3)c21)S(C)(=O)=O	8.38722	TRUE	<rdkit.Chem.rdchem.Mol object at 0x7facdf63c510>
CHEMBL1923006	4.1	nM	OCCn1ccc2ncnc(Nc3ccc(Oc4cccc(Cl)c4)c(Cl)c3)c21	8.38722	TRUE	<rdkit.Chem.rdchem.Mol object at 0x7facdf63c580>
CHEMBL288812	4.2	nM	Cn1nc(C(C)(C)C)cc1NC(=O)Nc1ccc(Cc2ccncc2)cc1	8.37675	TRUE	<rdkit.Chem.rdchem.Mol object at 0x7facdf63c5f0>
CHEMBL31373	4.3	nM	C=CC(=O)Nc1ccc2ncnc(Nc3ccc(F)c(Cl)c3)c2c1	8.36653	TRUE	<rdkit.Chem.rdchem.Mol object at 0x7facdf63c660>
CHEMBL1923019	4.3	nM	O=C(CO)NCCn1ccc2ncnc(Nc3ccc(Oc4cccc(C(F)(F)F)c4)c(Cl)c3)c21	8.36653	TRUE	<rdkit.Chem.rdchem.Mol object at 0x7facdf63c6d0>
CHEMBL569166	4.3	nM	O=C(NO)[C@H]1CC(CC(=O)N2CCCC2)CN[C@@H]1C(=O)N1CC=C(c2ccccc2)CC1	8.36653	TRUE	<rdkit.Chem.rdchem.Mol object at 0x7facdf63c740>
CHEMBL572302	4.4	nM	CN1C[C@@H](OC(=O)N2CCCCCC2)C[C@H](C(=O)NO)[C@H]1C(=O)N1CCN(c2ccccc2)CC1	8.35655	TRUE	<rdkit.Chem.rdchem.Mol object at 0x7facdf63c7b0>
CHEMBL1922999	4.6	nM	Cc1cccc(Oc2ccc(Nc3ncnc4cc[nH]c34)cc2Cl)c1	8.33724	TRUE	<rdkit.Chem.rdchem.Mol object at 0x7facdf63c820>
CHEMBL3353410	4.8	nM	C=CC(=O)Nc1cc(Nc2nccc(-c3cn(C)c4ccccc34)n2)c(OC)cc1N(C)CCN(C)C	8.31876	TRUE	<rdkit.Chem.rdchem.Mol object at 0x7facdf63c890>
CHEMBL1645470	5	nM	Cc1cccc(Nc2ncnn3ccc(CN4CCC(N)CC4)c23)c1	8.30103	TRUE	<rdkit.Chem.rdchem.Mol object at 0x7facdf63c900>
CHEMBL257873	5	nM	Cc1ccc(Oc2ccc(Nc3ncnc4[nH]nc(OCCN5CCC(O)CC5)c34)cc2F)cn1	8.30103	TRUE	<rdkit.Chem.rdchem.Mol object at 0x7facdf63c970>
CHEMBL403435	5	nM	Cc1cc(Nc2ncnc3[nH]nc(OCCN4CCC(O)CC4)c23)ccc1OCc1ccccn1	8.30103	TRUE	<rdkit.Chem.rdchem.Mol object at 0x7facdf63c9e0>
CHEMBL404405	5	nM	OC1CCN(CCOc2n[nH]c3ncnc(Nc4ccc(OCc5ccccn5)c(Cl)c4)c23)CC1	8.30103	TRUE	<rdkit.Chem.rdchem.Mol object at 0x7facdf63ca50>
CHEMBL136058	5	nM	O=C(/C=C/C(=O)Nc1cc2c(Nc3cccc(Br)c3)ncnc2cn1)NCCCN1CCOCC1	8.30103	TRUE	<rdkit.Chem.rdchem.Mol object at 0x7facdf63cac0>
CHEMBL1923010	5.1	nM	OCCOCCn1ccc2ncnc(Nc3ccc(Oc4cccc(C(F)(F)F)c4)c(Cl)c3)c21	8.29243	TRUE	<rdkit.Chem.rdchem.Mol object at 0x7facdf63cb30>
CHEMBL3545154	5.3	nM	C=CC(=O)N1CCC(Oc2cc3c(Nc4ccc(Cl)c(Cl)c4F)ncnc3cc2OC)CC1	8.27572	TRUE	<rdkit.Chem.rdchem.Mol object at 0x7facdf63cba0>
CHEMBL4793338	5.4	nM	C=CC(=O)Nc1cc2c(Nc3ccc(F)c(Cl)c3)ncnc2cc1OCc1cn(CCC(=O)NO)nn1	8.26761	TRUE	<rdkit.Chem.rdchem.Mol object at 0x7facdf63cc10>
CHEMBL202424	5.4	nM	CCCCC#CC(=O)Nc1cc2c(Nc3ccc(F)c(Cl)c3)ncnc2cn1	8.26761	TRUE	<rdkit.Chem.rdchem.Mol object at 0x7facdf63cc80>
CHEMBL576061	5.6	nM	O=C(NO)[C@H]1CC(CC(=O)N2CCCC2)CN[C@@H]1C(=O)N1CC[C@H](c2ccccc2)C1	8.25181	TRUE	<rdkit.Chem.rdchem.Mol object at 0x7facdf63ccf0>
CHEMBL569388	5.6	nM	O=C(NO)[C@H]1CC(OC(=O)N2CCCC2)CN[C@@H]1C(=O)N1CC=C(c2ccccc2)CC1	8.25181	TRUE	<rdkit.Chem.rdchem.Mol object at 0x7facdf63cd60>
CHEMBL4759072	5.7	nM	C=CC(=O)Nc1cc2c(Nc3ccc(F)c(Cl)c3)ncnc2cc1OCc1cn(CCCC(=O)NO)nn1	8.24413	TRUE	<rdkit.Chem.rdchem.Mol object at 0x7facdf63cdd0>
CHEMBL285063	5.7	nM	C=CC(=O)Nc1ccc2ncnc(Nc3cccc(Br)c3)c2c1	8.24413	TRUE	<rdkit.Chem.rdchem.Mol object at 0x7facdf63ce40>
CHEMBL2048798	6	nM	OCCn1ccc2ncnc(Nc3ccc(Oc4cccc5sccc45)c(Cl)c3)c21	8.22185	TRUE	<rdkit.Chem.rdchem.Mol object at 0x7facdf63ceb0>
CHEMBL256784	6	nM	C[C@H](Oc1cccc2ncnc(Nc3ccc4c(cnn4Cc4cccc(F)c4)c3)c12)C(=O)N(C)C	8.22185	TRUE	<rdkit.Chem.rdchem.Mol object at 0x7facdf63cf20>
CHEMBL1645472	6	nM	NC1CCN(Cc2ccn3ncnc(Nc4cccc(F)c4)c23)CC1	8.22185	TRUE	<rdkit.Chem.rdchem.Mol object at 0x7facdf63cf90>
CHEMBL1645471	6	nM	Cc1ccc(Nc2ncnn3ccc(CN4CCC(N)CC4)c23)cc1	8.22185	TRUE	<rdkit.Chem.rdchem.Mol object at 0x7facdf636040>
CHEMBL1645476	6	nM	NC1CCN(Cc2ccn3ncnc(Nc4ccc(F)c(Cl)c4)c23)CC1	8.22185	TRUE	<rdkit.Chem.rdchem.Mol object at 0x7facdf6360b0>
CHEMBL255237	6	nM	COCCO/N=C/c1c(N)ncnc1Nc1ccc2c(cnn2Cc2cccc(F)c2)c1	8.22185	TRUE	<rdkit.Chem.rdchem.Mol object at 0x7facdf636120>
CHEMBL587723	6	nM	CCN1CCN(Cc2ccc(-c3cc4c(N[C@H](C)c5ccccc5)ncnc4[nH]3)cc2)CC1	8.22185	TRUE	<rdkit.Chem.rdchem.Mol object at 0x7facdf636190>
CHEMBL257860	6	nM	OC1CCN(CCCOc2n[nH]c3ncnc(Nc4ccc(OCc5ccccn5)c(Cl)c4)c23)CC1	8.22185	TRUE	<rdkit.Chem.rdchem.Mol object at 0x7facdf636200>
CHEMBL3892310	6	nM	CN(C)C/C=C/C(=O)Nc1cc2c(Nc3ccc(F)c(Cl)c3)ncnc2cc1OCC1C2COCC21	8.22185	TRUE	<rdkit.Chem.rdchem.Mol object at 0x7facdf636270>
CHEMBL4796265	6.1	nM	CN1CCN(CC(=O)Nc2ccc3ncnc(Nc4ccc(OCc5cccc(F)c5)c(Cl)c4)c3c2)CC1	8.21467	TRUE	<rdkit.Chem.rdchem.Mol object at 0x7facdf6362e0>
CHEMBL4759112	6.2	nM	CN(C)C/C=C/C(=O)Nc1cc2ncnc(Nc3ccc(F)c(Cl)c3)c2cc1O[C@@H]1CCOC1	8.20761	TRUE	<rdkit.Chem.rdchem.Mol object at 0x7facdf636350>
CHEMBL1093234	6.3	nM	O=C(Nc1cccc(-c2nc3sccn3c2-c2ccnc(Nc3ccccc3)n2)c1)c1ccccc1	8.20066	TRUE	<rdkit.Chem.rdchem.Mol object at 0x7facdf6363c0>
CHEMBL2148044	6.3	nM	CS(=O)(=O)CC(=O)NCCn1ccc2ncnc(Nc3ccc(Oc4cccc(C(F)(F)F)c4)c(Cl)c3)c21	8.20066	TRUE	<rdkit.Chem.rdchem.Mol object at 0x7facdf636430>
CHEMBL5180965	6.31	nM	Cc1cc(Nc2ncnc3cc(O)c(NC(=O)/C=C/[C@H]4CCCN4C)cc23)ccc1Oc1ccn2cnnc2c1	8.19997	TRUE	<rdkit.Chem.rdchem.Mol object at 0x7facdf6364a0>
CHEMBL31419	6.4	nM	C=CC(=O)Nc1cc2c(Nc3cccc(Br)c3)ncnc2cc1OCCCN1CCOCC1	8.19382	TRUE	<rdkit.Chem.rdchem.Mol object at 0x7facdf636510>
CHEMBL3989868	6.9	nM	Cc1cc(Nc2ncnc3ccc(NC4=NC(C)(C)CO4)cc23)ccc1Oc1ccn2ncnc2c1	8.16115	TRUE	<rdkit.Chem.rdchem.Mol object at 0x7facdf636580>
CHEMBL1645466	7	nM	C#Cc1cccc(Nc2ncnn3ccc(CN4CCC(N)CC4)c23)c1	8.1549	TRUE	<rdkit.Chem.rdchem.Mol object at 0x7facdf6365f0>
CHEMBL498133	7	nM	Nc1ncnc(Nc2ccc3c(cnn3Cc3cccc(F)c3)c2)c1/C=N/N1CCOCC1	8.1549	TRUE	<rdkit.Chem.rdchem.Mol object at 0x7facdf636660>
CHEMBL402294	7	nM	CCO/N=C/c1c(N)ncnc1Nc1ccc2c(cnn2Cc2cccc(F)c2)c1	8.1549	TRUE	<rdkit.Chem.rdchem.Mol object at 0x7facdf6366d0>
CHEMBL4744985	7.3	nM	C=CC(=O)Nc1cc2c(Nc3ccc(F)c(Cl)c3)ncnc2cc1OCc1cn(CCCCC(=O)NO)nn1	8.13668	TRUE	<rdkit.Chem.rdchem.Mol object at 0x7facdf636740>
CHEMBL584116	7.3	nM	CN1C[C@@H](OC(=O)N2CCCCC2)C[C@H](C(=O)NO)[C@H]1C(=O)N1CCN(c2ccccc2)CC1	8.13668	TRUE	<rdkit.Chem.rdchem.Mol object at 0x7facdf6367b0>
CHEMBL280757	7.3	nM	C=CC(=O)Nc1ccc2ncnc(Nc3ccc(F)c(Br)c3)c2c1	8.13668	TRUE	<rdkit.Chem.rdchem.Mol object at 0x7facdf636820>
CHEMBL430571	7.6	nM	C=CC(=O)Nc1ccc2ncnc(Nc3ccc(OCc4ccccc4)cc3)c2c1	8.11919	TRUE	<rdkit.Chem.rdchem.Mol object at 0x7facdf636890>
CHEMBL1923013	7.7	nM	OCCNCCn1ccc2ncnc(Nc3ccc(Oc4cccc(C(F)(F)F)c4)c(Cl)c3)c21	8.11351	TRUE	<rdkit.Chem.rdchem.Mol object at 0x7facdf636900>
CHEMBL4758224	7.9	nM	C=CC(=O)Nc1cccc(-c2c[nH]c3ncnc(Nc4ccc5c(ccn5Cc5ccccc5)c4)c23)c1	8.10237	TRUE	<rdkit.Chem.rdchem.Mol object at 0x7facdf636970>
CHEMBL256783	8	nM	C[C@@H](Oc1cccc2ncnc(Nc3ccc4c(cnn4Cc4cccc(F)c4)c3)c12)C(=O)N(C)C	8.09691	TRUE	<rdkit.Chem.rdchem.Mol object at 0x7facdf6369e0>
CHEMBL1922901	8	nM	N#Cc1ccccc1Oc1ccc(Nc2ncnc3cc[nH]c23)cc1Cl	8.09691	TRUE	<rdkit.Chem.rdchem.Mol object at 0x7facdf636a50>
CHEMBL4794998	8	nM	C=CC(=O)Nc1cc2c(Nc3cccc(Cl)c3F)ncnc2cc1OCc1cn(CCCC(=O)NO)nn1	8.09691	TRUE	<rdkit.Chem.rdchem.Mol object at 0x7facdf636b30>
CHEMBL4068839	8.1	nM	C=CC(=O)N1CCC[C@@H](n2nc(-c3ccc(OCc4ccccn4)c(Cl)c3)c3c(N)ncnc32)C1	8.09151	TRUE	<rdkit.Chem.rdchem.Mol object at 0x7facdf636c10>
CHEMBL585886	8.1	nM	COC(=O)N1C[C@@H](OC(=O)N2CCCC2)C[C@H](C(=O)NO)[C@H]1C(=O)N1CCN(c2ccccc2)CC1	8.09151	TRUE	<rdkit.Chem.rdchem.Mol object at 0x7facdf636c80>
CHEMBL342828	8.1	nM	O=C(/C=C/C(=O)Nc1cc2c(Nc3cccc(Br)c3)ncnc2cn1)NCCCn1ccnc1	8.09151	TRUE	<rdkit.Chem.rdchem.Mol object at 0x7facdf636cf0>
CHEMBL27685	8.2	nM	C=CC(=O)Nc1cc2c(Nc3ccc(F)c(Br)c3)ncnc2cc1OCCCN1CCOCC1	8.08619	TRUE	<rdkit.Chem.rdchem.Mol object at 0x7facdf636d60>
CHEMBL1922902	8.2	nM	N#Cc1cccc(Oc2ccc(Nc3ncnc4cc[nH]c34)cc2Cl)c1	8.08619	TRUE	<rdkit.Chem.rdchem.Mol object at 0x7facdf636dd0>
CHEMBL1921812	8.3	nM	Clc1cccc(Oc2ccc(Nc3ncnc4cc[nH]c34)cc2Cl)c1	8.08092	TRUE	<rdkit.Chem.rdchem.Mol object at 0x7facdf636e40>
CHEMBL572301	8.5	nM	CC(C)OC(=O)N(C)C1CN[C@H](C(=O)N2CC=C(c3ccccc3)CC2)[C@@H](C(=O)NO)C1	8.07058	TRUE	<rdkit.Chem.rdchem.Mol object at 0x7facdf636eb0>
CHEMBL53203	8.6	nM	C=CC(=O)Nc1ccc2ncnc(Nc3ccc(Oc4ccccc4)cc3)c2c1	8.0655	TRUE	<rdkit.Chem.rdchem.Mol object at 0x7facdf636f20>
CHEMBL54088	8.8	nM	C=CC(=O)Nc1cc2c(Nc3cccc(C)c3)ncnc2cn1	8.05552	TRUE	<rdkit.Chem.rdchem.Mol object at 0x7facdf636f90>
CHEMBL1645467	9	nM	NC1CCN(Cc2ccn3ncnc(Nc4ccccc4)c23)CC1	8.04576	TRUE	<rdkit.Chem.rdchem.Mol object at 0x7facdf64e040>
CHEMBL206029	9	nM	CS(=O)(=O)CCNC(=O)NCc1cccc(C#Cc2cncnc2Nc2ccc(OCc3cccc(F)c3)c(Cl)c2)n1	8.04576	TRUE	<rdkit.Chem.rdchem.Mol object at 0x7facdf64e0b0>
CHEMBL31965	9	nM	C=CC(=O)Nc1cc2c(Nc3ccc(F)c(Cl)c3)ncnc2cc1OCCCN1CCOCC1	8.04576	TRUE	<rdkit.Chem.rdchem.Mol object at 0x7facdf64e190>
CHEMBL1922898	9.3	nM	Fc1ccccc1Oc1ccc(Nc2ncnc3cc[nH]c23)cc1Cl	8.03152	TRUE	<rdkit.Chem.rdchem.Mol object at 0x7facdf64e200>
CHEMBL1873475	9.4	nM	C=CC(=O)N1CCC[C@@H](n2nc(-c3ccc(Oc4ccccc4)cc3)c3c(N)ncnc32)C1	8.02687	TRUE	<rdkit.Chem.rdchem.Mol object at 0x7facdf64e270>
CHEMBL570760	10	nM	CN(C(=O)c1ccccc1)C1CN[C@H](C(=O)N2CC=C(c3ccccc3)CC2)[C@@H](C(=O)NO)C1	8	TRUE	<rdkit.Chem.rdchem.Mol object at 0x7facdf64e2e0>
CHEMBL4783947	10.4	nM	O=C(CNCCO)Nc1ccc2ncnc(Nc3ccc(OCc4cccc(F)c4)c(Cl)c3)c2c1	7.98297	TRUE	<rdkit.Chem.rdchem.Mol object at 0x7facdf64e350>
CHEMBL597551	10.6	nM	COc1cc2ncnc(Nc3ccc(F)c(Cl)c3)c2cc1OCCC(=O)NO	7.97469	TRUE	<rdkit.Chem.rdchem.Mol object at 0x7facdf64e3c0>
CHEMBL5209046	10.77	nM	Cc1cc(Nc2c(C#N)cnc3ccc(NC(=O)/C=C/[C@H]4CCCN4C)cc23)ccc1Oc1cc2nncn2cn1	7.96778	TRUE	<rdkit.Chem.rdchem.Mol object at 0x7facdf64e430>
CHEMBL1923004	11	nM	Cn1ccc2ncnc(Nc3ccc(Oc4cccc(C(F)(F)F)c4)c(Cl)c3)c21	7.95861	TRUE	<rdkit.Chem.rdchem.Mol object at 0x7facdf64e4a0>
CHEMBL3969056	11	nM	CN(C)C/C=C/C(=O)Nc1cc2c(Nc3ccc(Cc4ccccn4)cc3)ncnc2cn1	7.95861	TRUE	<rdkit.Chem.rdchem.Mol object at 0x7facdf64e510>
CHEMBL568346	11	nM	O=C(NO)[C@H]1C[C@H](OC(=O)N2CCCC2)CN[C@@H]1C(=O)N1CC=C(c2ccccc2)C1	7.95861	TRUE	<rdkit.Chem.rdchem.Mol object at 0x7facdf64e580>
CHEMBL257872	11	nM	Cc1ccc(Oc2ccc(Nc3ncnc4[nH]nc(OCCN5CCC(O)CC5)c34)cc2C)cn1	7.95861	TRUE	<rdkit.Chem.rdchem.Mol object at 0x7facdf64e5f0>
CHEMBL1922900	11	nM	Clc1ccccc1Oc1ccc(Nc2ncnc3cc[nH]c23)cc1Cl	7.95861	TRUE	<rdkit.Chem.rdchem.Mol object at 0x7facdf64e660>
CHEMBL497804	11	nM	O[C@H]1CN[C@H](C#Cc2cc3ncnc(Nc4ccc(OCc5cccc(F)c5)c(Cl)c4)c3s2)C1	7.95861	TRUE	<rdkit.Chem.rdchem.Mol object at 0x7facdf64e6d0>
CHEMBL1614726	11	nM	OCCOCCn1ccc2ncnc(Nc3cnc(Oc4cccc(C(F)(F)F)c4)c(Cl)c3)c21	7.95861	TRUE	<rdkit.Chem.rdchem.Mol object at 0x7facdf64e740>
CHEMBL4787483	11	nM	C=CC(=O)Nc1cccc(-c2c[nH]c3ncnc(Nc4ccc(OCc5ccccn5)c(Cl)c4)c23)c1	7.95861	TRUE	<rdkit.Chem.rdchem.Mol object at 0x7facdf64e7b0>
CHEMBL585299	11.5	nM	CN1C[C@@H](OC(=O)N2CCCC2)C[C@H](C(=O)NO)[C@H]1C(=O)N1CCN(c2ccccc2)CC1	7.9393	TRUE	<rdkit.Chem.rdchem.Mol object at 0x7facdf64e820>
CHEMBL483321	12	nM	COCC(=O)NC/C=C/c1ccc2ncnc(Nc3ccc(Oc4ccc(C)nc4)c(C)c3)c2c1	7.92082	TRUE	<rdkit.Chem.rdchem.Mol object at 0x7facdf64e890>
CHEMBL255871	12	nM	CO/N=C/c1c(N)ncnc1Nc1ccc2c(cnn2Cc2cccc(F)c2)c1	7.92082	TRUE	<rdkit.Chem.rdchem.Mol object at 0x7facdf64e900>
CHEMBL4778909	12	nM	C=CC(=O)Nc1cccc(-c2c[nH]c3ncnc(Nc4ccc5c(cnn5Cc5ccccc5)c4)c23)c1	7.92082	TRUE	<rdkit.Chem.rdchem.Mol object at 0x7facdf64e970>
CHEMBL417478	12	nM	C=CC(=O)Nc1nc2c(Nc3ccc(F)c(Cl)c3)ncnc2cc1/C=C/CCN1CCOCC1	7.92082	TRUE	<rdkit.Chem.rdchem.Mol object at 0x7facdf64e9e0>
CHEMBL1923007	12	nM	OCCn1ccc2ncnc(Nc3ccc(Oc4cccc(C(F)(F)F)c4)c(Cl)c3)c21	7.92082	TRUE	<rdkit.Chem.rdchem.Mol object at 0x7facdf64ea50>
CHEMBL381604	12	nM	Nc1nccc(C#Cc2cncnc2Nc2ccc(OCc3cccc(F)c3)c(Cl)c2)n1	7.92082	TRUE	<rdkit.Chem.rdchem.Mol object at 0x7facdf64eac0>
CHEMBL404181	12	nM	C[C@H](Oc1cccc2ncnc(Nc3ccc4c(cnn4Cc4nccs4)c3)c12)C(=O)N1CCOCC1	7.92082	TRUE	<rdkit.Chem.rdchem.Mol object at 0x7facdf64eb30>
CHEMBL28418	12	nM	C=CC(=O)Nc1ccc2ncnc(Nc3ccc(F)c(Cl)c3)c2n1	7.92082	TRUE	<rdkit.Chem.rdchem.Mol object at 0x7facdf64eba0>
CHEMBL597752	12.4	nM	COc1cc2ncnc(Nc3ccc(F)c(Cl)c3)c2cc1OCCCC(=O)NO	7.90658	TRUE	<rdkit.Chem.rdchem.Mol object at 0x7facdf64ec10>
CHEMBL1923000	13	nM	Fc1cccc(COc2ccc(Nc3ncnc4cc[nH]c34)cc2Cl)c1	7.88606	TRUE	<rdkit.Chem.rdchem.Mol object at 0x7facdf64ec80>
CHEMBL204570	13	nM	OCc1cccc(C#Cc2cncnc2Nc2ccc(OCc3cccc(F)c3)c(Cl)c2)n1	7.88606	TRUE	<rdkit.Chem.rdchem.Mol object at 0x7facdf64ecf0>
CHEMBL248114	13	nM	Cc1cncc(Cn2ncc3cc(Nc4ncnn5ccc(CN6CCC(N)CC6)c45)ccc32)c1	7.88606	TRUE	<rdkit.Chem.rdchem.Mol object at 0x7facdf64ed60>
CHEMBL3133816	13	nM	CC(=O)c1ccc2[nH]c3nccc(Nc4cccc(O)c4)c3c2c1	7.88606	TRUE	<rdkit.Chem.rdchem.Mol object at 0x7facdf64edd0>
CHEMBL205798	13	nM	CC(=O)Nc1cccc(C#Cc2cncnc2Nc2ccc(OCc3cccc(F)c3)c(Cl)c2)c1	7.88606	TRUE	<rdkit.Chem.rdchem.Mol object at 0x7facdf64ee40>
CHEMBL4759178	13	nM	C=CC(=O)Nc1cccc(-c2c[nH]c3ncnc(Nc4ccc(Oc5ccccc5)cc4)c23)c1	7.88606	TRUE	<rdkit.Chem.rdchem.Mol object at 0x7facdf64eeb0>
CHEMBL334801	13	nM	CN(C)CCCNC(=O)/C=C/C(=O)Nc1cc2c(Nc3cccc(Br)c3)ncnc2cn1	7.88606	TRUE	<rdkit.Chem.rdchem.Mol object at 0x7facdf64ef20>
CHEMBL4759697	13	nM	C=CC(=O)Nc1cc2c(Nc3cccc(Cl)c3F)ncnc2cc1OCc1cn(CCC(=O)NO)nn1	7.88606	TRUE	<rdkit.Chem.rdchem.Mol object at 0x7facdf64ef90>
CHEMBL5286014	13	nM	C=CC(=O)N1CCC[C@H](n2nc(C(=O)c3ccc(CC(=O)N(C)C)c(C)c3C)c3c(N)ncnc32)C1	7.88606	TRUE	<rdkit.Chem.rdchem.Mol object at 0x7facdf635040>
CHEMBL496174	13	nM	Fc1cccc(COc2ccc(Nc3ncnc4cc(C#C[C@H]5CCCN5)sc34)cc2Cl)c1	7.88606	TRUE	<rdkit.Chem.rdchem.Mol object at 0x7facdf6350b0>
CHEMBL488350	13	nM	COC(=O)CNCc1ccc(-c2cc3c(Nc4ccc(OCc5ccccc5)cc4)ncnc3cn2)o1	7.88606	TRUE	<rdkit.Chem.rdchem.Mol object at 0x7facdf635120>
CHEMBL434827	14	nM	CCN(CC)CCCNC(=O)/C=C/C(=O)Nc1cc2c(Nc3cccc(Br)c3)ncnc2cn1	7.85387	TRUE	<rdkit.Chem.rdchem.Mol object at 0x7facdf635190>
CHEMBL3930506	14	nM	O=C(/C=C/CN1CCCCC1)Nc1cc2c(Nc3ccc(F)c(Cl)c3)ncnc2cn1	7.85387	TRUE	<rdkit.Chem.rdchem.Mol object at 0x7facdf635200>
CHEMBL329856	14	nM	CN(C)CC#CC(=O)Nc1ccc2ncnc(Nc3cccc(Br)c3)c2c1	7.85387	TRUE	<rdkit.Chem.rdchem.Mol object at 0x7facdf635270>
CHEMBL514938	14	nM	Fc1cccc(COc2ccc(Nc3ncnc4sc(-c5ccco5)cc34)cc2Cl)c1	7.85387	TRUE	<rdkit.Chem.rdchem.Mol object at 0x7facdf635350>
CHEMBL2347958	14	nM	CN(C)C/C=C/C(=O)Nc1cc2c(Nc3ccc(F)c(Cl)c3)ncnc2cc1O[C@@H]1CCOC1	7.85387	TRUE	<rdkit.Chem.rdchem.Mol object at 0x7facdf6353c0>
CHEMBL4783667	15	nM	C=CC(=O)Nc1cc(-c2c[nH]c3ncnc(Nc4ccc(CN5C(=O)c6ccccc6C5=O)cc4)c23)ccc1OCCO	7.82391	TRUE	<rdkit.Chem.rdchem.Mol object at 0x7facdf635430>
CHEMBL1923012	15	nM	OCCCCCn1ccc2ncnc(Nc3ccc(Oc4cccc(C(F)(F)F)c4)c(Cl)c3)c21	7.82391	TRUE	<rdkit.Chem.rdchem.Mol object at 0x7facdf6354a0>
CHEMBL596736	15	nM	COc1cc2ncnc(Nc3ccc(F)c(Cl)c3)c2cc1OCCCCC(=O)NO	7.82391	TRUE	<rdkit.Chem.rdchem.Mol object at 0x7facdf635510>
CHEMBL569853	15.5	nM	CC(C)C(=O)N(C)C1CN[C@H](C(=O)N2CC=C(c3ccccc3)CC2)[C@@H](C(=O)NO)C1	7.80967	TRUE	<rdkit.Chem.rdchem.Mol object at 0x7facdf635580>
CHEMBL4637274	15.7	nM	C#Cc1cccc(Nc2cccc3cc(OC)c(OCCCCCCC(=O)NO)cc23)c1	7.8041	TRUE	<rdkit.Chem.rdchem.Mol object at 0x7facdf6355f0>
CHEMBL598797	15.7	nM	C#Cc1cccc(Nc2ncnc3cc(OC)c(OCCCCCCC(=O)NO)cc23)c1	7.8041	TRUE	<rdkit.Chem.rdchem.Mol object at 0x7facdf635660>
CHEMBL1922897	16	nM	Clc1cc(Nc2ncnc3cc[nH]c23)ccc1Oc1ccccc1	7.79588	TRUE	<rdkit.Chem.rdchem.Mol object at 0x7facdf6356d0>
CHEMBL233325	16	nM	O[C@H]1CNCCN(Cc2ccn3ncnc(Nc4ccc5c(cnn5Cc5cccc(F)c5)c4)c23)C1	7.79588	TRUE	<rdkit.Chem.rdchem.Mol object at 0x7facdf635740>
CHEMBL4783641	16	nM	C=CC(=O)Nc1cc2c(Nc3cccc(Cl)c3F)ncnc2cc1OCc1cn(CCCCC(=O)NO)nn1	7.79588	TRUE	<rdkit.Chem.rdchem.Mol object at 0x7facdf6357b0>
CHEMBL30432	16	nM	CN(C)c1cc2c(Nc3ccc4c(cnn4Cc4ccccc4)c3)ncnc2cn1	7.79588	TRUE	<rdkit.Chem.rdchem.Mol object at 0x7facdf635820>
CHEMBL94062	16	nM	O=C(C#CCO)Nc1ccc2ncnc(Nc3cccc(Br)c3)c2c1	7.79588	TRUE	<rdkit.Chem.rdchem.Mol object at 0x7facdf635890>
CHEMBL3633929	16	nM	CC(=O)Nc1ccc2ncnc(Nc3ccc(OCc4ccccn4)c(Cl)c3)c2c1	7.79588	TRUE	<rdkit.Chem.rdchem.Mol object at 0x7facdf635900>
CHEMBL461426	16	nM	NC(=O)O[C@H]1CN[C@H](C#Cc2cc3ncnc(Nc4ccc(OCc5cccc(F)c5)c(Cl)c4)c3s2)C1	7.79588	TRUE	<rdkit.Chem.rdchem.Mol object at 0x7facdf635970>
CHEMBL3967962	17	nM	O=C(/C=C/CN1CCCC1)Nc1cc2c(Nc3ccc(Cc4ccccn4)cc3)ncnc2cn1	7.76955	TRUE	<rdkit.Chem.rdchem.Mol object at 0x7facdf6359e0>
CHEMBL401713	17	nM	COc1cc(Nc2ncnc3[nH]nc(OCCN4CCC(O)CC4)c23)ccc1OCc1ccccn1	7.76955	TRUE	<rdkit.Chem.rdchem.Mol object at 0x7facdf635a50>
CHEMBL448628	17	nM	COc1ccccc1Cc1nc2ccc(-c3nn([C@H]4CC[C@H](N5CCN(C(=O)N(C)C)CC5)CC4)c4ncnc(N)c34)cc2[nH]1	7.76955	TRUE	<rdkit.Chem.rdchem.Mol object at 0x7facdf635ac0>
CHEMBL1923005	17	nM	Cn1ccc2ncnc(Nc3ccc(Oc4cccc(OC(F)(F)F)c4)c(Cl)c3)c21	7.76955	TRUE	<rdkit.Chem.rdchem.Mol object at 0x7facdf635b30>
CHEMBL256297	18	nM	CO/N=C/c1c(N)ncnc1Nc1ccc(OCc2cccc(F)c2)c(Cl)c1	7.74473	TRUE	<rdkit.Chem.rdchem.Mol object at 0x7facdf635ba0>
CHEMBL228276	18	nM	Cc1cc(Nc2ncnc3cnc(N4CCOCC4)cc23)ccc1OC1CCN(C(=O)C2CCCC2)CC1	7.74473	TRUE	<rdkit.Chem.rdchem.Mol object at 0x7facdf635c10>
CHEMBL373532	18	nM	O=C(NO)[C@H]1CC2(CC2)CN[C@@H]1C(=O)N1CC=C(c2ccccc2)CC1	7.74473	TRUE	<rdkit.Chem.rdchem.Mol object at 0x7facdf635c80>
CHEMBL2048790	18	nM	O=C1NCc2cc(Oc3ccc(Nc4ncnc5ccn(CCO)c45)cc3Cl)ccc21	7.74473	TRUE	<rdkit.Chem.rdchem.Mol object at 0x7facdf635cf0>
CHEMBL569880	18	nM	C=CC(=O)N1CCC[C@H]1C(=O)Nc1cc2c(Nc3ccc(F)c(Cl)c3F)ncnc2cc1OCCOC	7.74473	TRUE	<rdkit.Chem.rdchem.Mol object at 0x7facdf635d60>
CHEMBL394057	18	nM	O=C(O)COCc1ccn2ncnc(Nc3ccc4c(cnn4Cc4cccc(F)c4)c3)c12	7.74473	TRUE	<rdkit.Chem.rdchem.Mol object at 0x7facdf635dd0>
CHEMBL248322	18	nM	NC1CCN(Cc2ccn3ncnc(Nc4ccc(OCc5cccc[n+]5[O-])c(Cl)c4)c23)CC1	7.74473	TRUE	<rdkit.Chem.rdchem.Mol object at 0x7facdf635e40>
CHEMBL2348416	18	nM	COC(=O)C1=Cc2c(ncnc2Nc2ccc(Oc3cccc4sccc34)c(Cl)c2)NCC1	7.74473	TRUE	<rdkit.Chem.rdchem.Mol object at 0x7facdf635eb0>
CHEMBL496628	18	nM	O=C(NO)[C@H]1C[C@@H](CC(=O)N2CCCCC2)CC[C@@H]1C(=O)N1CCN(c2ccccc2)CC1	7.74473	TRUE	<rdkit.Chem.rdchem.Mol object at 0x7facdf635f20>
CHEMBL524457	18	nM	Nc1ncnc(Nc2ccc3c(cnn3Cc3cccc(F)c3)c2)c1/C=N/N1CCCCC1	7.74473	TRUE	<rdkit.Chem.rdchem.Mol object at 0x7facdf635f90>
CHEMBL565714	18	nM	CCC1=C2C(Nc3ccc4c(cnn4Cc4ccccc4)c3)=NC=NC2N=C1NC(=O)OCCN1CCNCC1	7.74473	TRUE	<rdkit.Chem.rdchem.Mol object at 0x7facdf628040>
CHEMBL565467	18	nM	CCC1=C2C(Nc3ccc4c(cnn4Cc4ccccc4)c3)=NC=NC2N=C1NC(=O)O[C@H]1CC[C@H](N)CC1	7.74473	TRUE	<rdkit.Chem.rdchem.Mol object at 0x7facdf6280b0>
CHEMBL255376	19	nM	OC1CCN(CCOc2n[nH]c3ncnc(Nc4ccc(OCc5cccc(F)c5)c(Cl)c4)c23)CC1	7.72125	TRUE	<rdkit.Chem.rdchem.Mol object at 0x7facdf628120>
CHEMBL598377	19	nM	COc1cc2ncnc(Nc3ccc(F)c(Cl)c3)c2cc1OCCCCCCC(=O)NO	7.72125	TRUE	<rdkit.Chem.rdchem.Mol object at 0x7facdf628190>
CHEMBL3970330	19	nM	COCCOc1cc2ncnc(Nc3ccc4c(cnn4Cc4ccccc4)c3)c2cc1NC(=O)/C=C/CN1CCN(C)CC1	7.72125	TRUE	<rdkit.Chem.rdchem.Mol object at 0x7facdf628200>
CHEMBL403774	19	nM	C[C@@H](Oc1cccc2ncnc(Nc3ccc(OCc4ccccn4)c(Cl)c3)c12)C(=O)N1CCOCC1	7.72125	TRUE	<rdkit.Chem.rdchem.Mol object at 0x7facdf628270>
CHEMBL2138625	19	nM	C=CC(=O)Nc1cc2c(Nc3ccc(F)c(Cl)c3)ncnc2cc1C#CC(C)(C)N1CCN(C)CC1	7.72125	TRUE	<rdkit.Chem.rdchem.Mol object at 0x7facdf6282e0>
CHEMBL477078	19	nM	O=C(O)CNCc1ccc(-c2cc3c(Nc4ccc(OCc5ccccc5)cc4)ncnc3cn2)o1	7.72125	TRUE	<rdkit.Chem.rdchem.Mol object at 0x7facdf628350>
CHEMBL403785	19	nM	C[C@@H](COc1cccc2ncnc(Nc3ccc(OCc4ccccn4)c(Cl)c3)c12)N(C)C(=O)CO	7.72125	TRUE	<rdkit.Chem.rdchem.Mol object at 0x7facdf6283c0>
CHEMBL493428	19	nM	CS(=O)(=O)CCNCCCCOc1ccc2ncnc(Nc3ccc4c(cnn4Cc4cccc(F)c4)c3)c2c1	7.72125	TRUE	<rdkit.Chem.rdchem.Mol object at 0x7facdf628430>
CHEMBL499534	20	nM	O=C(O[C@H]1CN[C@H](C#Cc2cc3ncnc(Nc4ccc(OCc5cccc(F)c5)c(Cl)c4)c3s2)C1)N1CCNCC1	7.69897	TRUE	<rdkit.Chem.rdchem.Mol object at 0x7facdf6284a0>
CHEMBL567197	20	nM	CCC1=C2C(Nc3ccc4c(cnn4Cc4ccccc4)c3)=NC=NC2N=C1NC(=O)O[C@H]1CC[C@@](C)(N)CC1	7.69897	TRUE	<rdkit.Chem.rdchem.Mol object at 0x7facdf628510>
CHEMBL1922899	20	nM	Fc1cccc(Oc2ccc(Nc3ncnc4cc[nH]c34)cc2Cl)c1	7.69897	TRUE	<rdkit.Chem.rdchem.Mol object at 0x7facdf628580>
CHEMBL1645465	20	nM	C#Cc1cccc(Nc2ncnn3ccc(COC[C@@H]4CNCCO4)c23)c1	7.69897	TRUE	<rdkit.Chem.rdchem.Mol object at 0x7facdf6285f0>
CHEMBL497863	20	nM	Nc1ncnc(Nc2ccc3c(cnn3Cc3cccc(F)c3)c2)c1/C=N/NCC(F)(F)F	7.69897	TRUE	<rdkit.Chem.rdchem.Mol object at 0x7facdf628660>
CHEMBL1645469	20	nM	Cc1ccccc1Nc1ncnn2ccc(CN3CCC(N)CC3)c12	7.69897	TRUE	<rdkit.Chem.rdchem.Mol object at 0x7facdf6286d0>
CHEMBL598163	20	nM	COc1cc2ncnc(Nc3ccc(F)c(Cl)c3)c2cc1OCCCCCC(=O)NO	7.69897	TRUE	<rdkit.Chem.rdchem.Mol object at 0x7facdf628740>
CHEMBL597773	20.1	nM	COc1cc2ncnc(Nc3ccc(F)c(Cl)c3)c2cc1NC(=O)CCCCCCC(=O)NO	7.6968	TRUE	<rdkit.Chem.rdchem.Mol object at 0x7facdf6287b0>
CHEMBL5280584	21	nM	Cc1ccccc1NC(=O)CSc1nc2cc3ccccc3cc2c(=O)n1-c1ccc(S(N)(=O)=O)cc1	7.67778	TRUE	<rdkit.Chem.rdchem.Mol object at 0x7facdf628820>
CHEMBL567873	21	nM	CCC1=C2C(Nc3ccc4c(cnn4Cc4ccccc4)c3)=NC=NC2N=C1NC(=O)OC[C@@H]1COCCN1	7.67778	TRUE	<rdkit.Chem.rdchem.Mol object at 0x7facdf628900>
CHEMBL5277831	21	nM	Cc1ccc(NC(=O)CSc2nc3cc4ccccc4cc3c(=O)n2-c2ccc(S(N)(=O)=O)cc2)cc1	7.67778	TRUE	<rdkit.Chem.rdchem.Mol object at 0x7facdf6289e0>
CHEMBL439425	22	nM	C[C@@H](Oc1cccc2ncnc(Nc3ccc4c(cnn4Cc4cccc(F)c4)c3)c12)C(=O)N1CCOCC1	7.65758	TRUE	<rdkit.Chem.rdchem.Mol object at 0x7facdf628a50>
CHEMBL31815	22	nM	C=CC(=O)Nc1ccc2ncnc(Nc3cccc(C)c3)c2c1	7.65758	TRUE	<rdkit.Chem.rdchem.Mol object at 0x7facdf628ac0>
CHEMBL248116	22	nM	NC1CCN(Cc2ccn3ncnc(Nc4ccc(OCc5ccccn5)c(Cl)c4)c23)CC1	7.65758	TRUE	<rdkit.Chem.rdchem.Mol object at 0x7facdf628b30>
CHEMBL402113	22	nM	CO/N=C/c1c(N)ncnc1Nc1ccc2c(cnn2Cc2ccccc2)c1	7.65758	TRUE	<rdkit.Chem.rdchem.Mol object at 0x7facdf628ba0>
CHEMBL413987	22	nM	C[C@@H](CN(C)C(=O)CO)Oc1cccc2ncnc(Nc3ccc(OCc4ccccn4)c(Cl)c3)c12	7.65758	TRUE	<rdkit.Chem.rdchem.Mol object at 0x7facdf628c10>
CHEMBL1923001	22	nM	Clc1cc(Nc2ncnc3cc[nH]c23)ccc1OCc1ccccn1	7.65758	TRUE	<rdkit.Chem.rdchem.Mol object at 0x7facdf628c80>
CHEMBL402507	22	nM	Cc1ccc(Oc2ccc(Nc3ncnc4cccc(O[C@H](C)C(=O)N5CCOCC5)c34)cc2C)cn1	7.65758	TRUE	<rdkit.Chem.rdchem.Mol object at 0x7facdf628cf0>
CHEMBL583403	22	nM	CCC1=C2C(Nc3ccc4c(cnn4Cc4cccc(F)c4)c3)=NC=NC2N=C1NC(=O)OC[C@@H]1COCCN1	7.65758	TRUE	<rdkit.Chem.rdchem.Mol object at 0x7facdf628d60>
CHEMBL1645462	22	nM	Cc1c(NC(=O)OC[C@@H]2COCCN2)cn2ncnc(Nc3ccc4c(cnn4Cc4cccc(F)c4)c3)c12	7.65758	TRUE	<rdkit.Chem.rdchem.Mol object at 0x7facdf628dd0>
CHEMBL3901296	22	nM	CN(C)C/C=C/C(=O)Nc1cc2c(Nc3ccc(F)c(Cl)c3)ncnc2cc1OC[C@@]12COC[C@@H]1C2	7.65758	TRUE	<rdkit.Chem.rdchem.Mol object at 0x7facdf628e40>
CHEMBL2035810	22.4	nM	C=CC(=O)NCc1coc(-c2c(N)ncnc2Nc2ccc(OCc3ccccn3)c(Cl)c2)n1	7.64975	TRUE	<rdkit.Chem.rdchem.Mol object at 0x7facdf628eb0>
CHEMBL3921129	23	nM	CCOc1cc2ncnc(Nc3ccc4c(cnn4Cc4ccccc4)c3)c2cc1NC(=O)/C=C/CN1CCN(C)CC1	7.63827	TRUE	<rdkit.Chem.rdchem.Mol object at 0x7facdf628f20>
CHEMBL411799	23	nM	COc1cc(Nc2ncnc3cccc(O[C@H](C)C(=O)N4CCOCC4)c23)ccc1Oc1ccc(C)nc1	7.63827	TRUE	<rdkit.Chem.rdchem.Mol object at 0x7facdf628f90>
CHEMBL411192	23	nM	Cc1cc(Nc2ncnc3cnc(N4CCOCC4)cc23)ccc1OC1CCN(C(=O)CC(C)(C)C)CC1	7.63827	TRUE	<rdkit.Chem.rdchem.Mol object at 0x7facdf656040>
CHEMBL248108	23	nM	NC1CCN(Cc2ccn3ncnc(Nc4ccc5c(cnn5Cc5cccc(F)c5)c4)c23)CC1	7.63827	TRUE	<rdkit.Chem.rdchem.Mol object at 0x7facdf6560b0>
CHEMBL583218	23	nM	CCC1=C2C(Nc3ccc4c(cnn4Cc4ccccc4)c3)=NC=NC2N=C1NC(=O)OCC1CCNCC1	7.63827	TRUE	<rdkit.Chem.rdchem.Mol object at 0x7facdf656120>
CHEMBL256362	23	nM	Cc1ccc(Oc2ccc(Nc3ncnc4cccc(O[C@H](C)C(=O)N(C)C)c34)cc2C)cn1	7.63827	TRUE	<rdkit.Chem.rdchem.Mol object at 0x7facdf656190>
CHEMBL4211949	23.2	nM	C=CC(=O)N[C@@H]1Cn2c(c(-c3ccc(Oc4ccccc4)cc3)c3c(N)ncnc32)C1=C	7.63451	TRUE	<rdkit.Chem.rdchem.Mol object at 0x7facdf656200>
CHEMBL138940	24	nM	O=C(/C=C/C(=O)Nc1cc2c(Nc3ccc(F)c(Cl)c3)ncnc2cn1)NCCCN1CCOCC1	7.61979	TRUE	<rdkit.Chem.rdchem.Mol object at 0x7facdf656270>
CHEMBL193578	24	nM	Clc1cc(Nc2ncnc3cccc(OC4CCOCC4)c23)ccc1OCc1ccccn1	7.61979	TRUE	<rdkit.Chem.rdchem.Mol object at 0x7facdf6562e0>
CHEMBL257198	24	nM	C[C@H](Oc1cccc2ncnc(Nc3ccc4c(cnn4Cc4nccs4)c3)c12)C(=O)N(C)C	7.61979	TRUE	<rdkit.Chem.rdchem.Mol object at 0x7facdf656350>
CHEMBL301018	24	nM	COc1cc2ncnc(Nc3ccc(F)c(Cl)c3)c2cc1OC	7.61979	TRUE	<rdkit.Chem.rdchem.Mol object at 0x7facdf6563c0>
CHEMBL194389	24	nM	COc1cccc2ncnc(Nc3ccc(OCc4ccccn4)c(Cl)c3)c12	7.61979	TRUE	<rdkit.Chem.rdchem.Mol object at 0x7facdf656430>
CHEMBL596754	24.2	nM	COc1cc2ncnc(Nc3ccc(F)c(Cl)c3)c2cc1SCCCCCCC(=O)NO	7.61618	TRUE	<rdkit.Chem.rdchem.Mol object at 0x7facdf6564a0>
CHEMBL402293	25	nM	CC(C)O/N=C/c1c(N)ncnc1Nc1ccc2c(cnn2Cc2cccc(F)c2)c1	7.60206	TRUE	<rdkit.Chem.rdchem.Mol object at 0x7facdf656510>
CHEMBL4112924	25	nM	CO[C@@H]1COC2C1OC[C@H]2Oc1cc2ncnc(Nc3ccc(F)c(Cl)c3)c2cc1NC(=O)/C=C/CN(C)C	7.60206	TRUE	<rdkit.Chem.rdchem.Mol object at 0x7facdf656580>
CHEMBL257197	26	nM	C[C@@H](Oc1cccc2ncnc(Nc3ccc4c(cnn4Cc4nccs4)c3)c12)C(=O)N(C)C	7.58503	TRUE	<rdkit.Chem.rdchem.Mol object at 0x7facdf6565f0>
CHEMBL202556	26	nM	O=C(C#CCN1CCOCC1)Nc1cc2c(Nc3ccc(F)c(Cl)c3)ncnc2cn1	7.58503	TRUE	<rdkit.Chem.rdchem.Mol object at 0x7facdf656660>
CHEMBL3409484	26	nM	CS(=O)(=O)CCNCc1ccc(-c2cc3c(Nc4ccc(OCc5ccccc5)cc4)ncnc3cn2)o1	7.58503	TRUE	<rdkit.Chem.rdchem.Mol object at 0x7facdf6566d0>
CHEMBL248321	26	nM	NC1CCN(Cc2ccn3ncnc(Nc4ccc(OCc5cnccn5)c(Cl)c4)c23)CC1	7.58503	TRUE	<rdkit.Chem.rdchem.Mol object at 0x7facdf656740>
CHEMBL1921813	26	nM	COc1cccc(Oc2ccc(Nc3ncnc4cc[nH]c34)cc2Cl)c1	7.58503	TRUE	<rdkit.Chem.rdchem.Mol object at 0x7facdf6567b0>
CHEMBL53665	26	nM	C=CC(=O)Nc1ccc2ncnc(Nc3ccc(F)c(Br)c3)c2n1	7.58503	TRUE	<rdkit.Chem.rdchem.Mol object at 0x7facdf656820>
CHEMBL392273	27	nM	Fc1cccc(Cn2ncc3cc(Nc4ncnn5ccc(CN6CCCNCC6)c45)ccc32)c1	7.56864	TRUE	<rdkit.Chem.rdchem.Mol object at 0x7facdf656890>
CHEMBL3907533	27	nM	CCOc1cc2ncnc(Nc3ccc4c(cnn4Cc4ccccc4)c3)c2cc1NC(=O)/C=C/CN1CCOCC1	7.56864	TRUE	<rdkit.Chem.rdchem.Mol object at 0x7facdf656900>
CHEMBL257816	27	nM	CO/N=C/c1c(N)ncnc1Nc1ccc2c(ccn2Cc2cccc(F)c2)c1	7.56864	TRUE	<rdkit.Chem.rdchem.Mol object at 0x7facdf656970>
CHEMBL572045	27.5	nM	CN1C[C@@H](OC(=O)N2CCCCCCC2)C[C@H](C(=O)NO)[C@H]1C(=O)N1CCN(c2ccccc2)CC1	7.56067	TRUE	<rdkit.Chem.rdchem.Mol object at 0x7facdf6569e0>
CHEMBL605976	27.8	nM	COc1cc2ncnc(N[C@H](C)c3ccccc3)c2cc1OCCCCCCC(=O)NO	7.55596	TRUE	<rdkit.Chem.rdchem.Mol object at 0x7facdf656a50>
CHEMBL2048791	28	nM	O=C1Cc2cc(Oc3ccc(Nc4ncnc5ccn(CCO)c45)cc3Cl)ccc2N1	7.55284	TRUE	<rdkit.Chem.rdchem.Mol object at 0x7facdf656ac0>
CHEMBL495596	28	nM	O=C(NO)[C@H]1CC(CC(=O)N2CCCC2)CN[C@@H]1C(=O)N1CCN(c2ccccc2)CC1	7.55284	TRUE	<rdkit.Chem.rdchem.Mol object at 0x7facdf656b30>
CHEMBL1204013	28	nM	Cl.O=C(NO)[C@H]1CC(OC(=O)N2CCCC2)CN[C@@H]1C(=O)N1CC[C@H](c2ccccc2)C1	7.55284	TRUE	<rdkit.Chem.rdchem.Mol object at 0x7facdf656ba0>
CHEMBL566350	28	nM	CCC1=C2C(Nc3ccc4c(cnn4Cc4ccccc4)c3)=NC=NC2N=C1NC(=O)OCCN1CCCCC1	7.55284	TRUE	<rdkit.Chem.rdchem.Mol object at 0x7facdf656c10>
CHEMBL3133833	29	nM	Oc1cccc(Nc2ccnc3[nH]c4ccc(Br)cc4c23)c1	7.5376	TRUE	<rdkit.Chem.rdchem.Mol object at 0x7facdf656c80>
CHEMBL1928947	29	nM	C=CC(=O)Nc1cccc(Oc2cc(Nc3ccc(OCc4cccc(F)c4)c(Cl)c3)ncn2)c1	7.5376	TRUE	<rdkit.Chem.rdchem.Mol object at 0x7facdf656cf0>
CHEMBL1923008	29	nM	OCCn1ccc2ncnc(Nc3ccc(Oc4cccc(OC(F)(F)F)c4)c(Cl)c3)c21	7.5376	TRUE	<rdkit.Chem.rdchem.Mol object at 0x7facdf656d60>
CHEMBL4763834	29	nM	C=CC(=O)Nc1cccc(-c2c[nH]c3ncnc(Nc4ccc(Cc5ccccc5)cc4)c23)c1	7.5376	TRUE	<rdkit.Chem.rdchem.Mol object at 0x7facdf656dd0>
CHEMBL584960	29	nM	CN(C(=O)c1ccccc1)C1CN[C@H](C(=O)N2CC[C@H](c3ccccc3)C2)[C@@H](C(=O)NO)C1	7.5376	TRUE	<rdkit.Chem.rdchem.Mol object at 0x7facdf656e40>
CHEMBL584714	29	nM	CCC1=C2C(Nc3ccc4c(cnn4Cc4ccccc4)c3)=NC=NC2N=C1NC(=O)OCC1CCCNC1	7.5376	TRUE	<rdkit.Chem.rdchem.Mol object at 0x7facdf656eb0>
CHEMBL2348414	29	nM	O=C(NCCO)C1=Cc2c(ncnc2Nc2ccc(Oc3cccc(C(F)(F)F)c3)c(Cl)c2)NCC1	7.5376	TRUE	<rdkit.Chem.rdchem.Mol object at 0x7facdf656f20>
CHEMBL566559	30	nM	CCC1=C2C(Nc3ccc4c(cnn4Cc4ccccc4)c3)=NC=NC2N=C1NC(=O)OCC1CCCCN1	7.52288	TRUE	<rdkit.Chem.rdchem.Mol object at 0x7facdf656f90>
CHEMBL504117	30	nM	O=C(O[C@H]1CN[C@H](C#Cc2cc3ncnc(Nc4ccc(OCc5ccccn5)c(Cl)c4)c3s2)C1)N1CCOCC1	7.52288	TRUE	<rdkit.Chem.rdchem.Mol object at 0x7facdf657040>
CHEMBL429760	30	nM	Cc1ccc(Oc2ccc(Nc3ncnc4cccc(O[C@@H](C)C(=O)N(C)C)c34)cc2C)cn1	7.52288	TRUE	<rdkit.Chem.rdchem.Mol object at 0x7facdf6570b0>
CHEMBL3233785	30	nM	O=C(/C=C/CN1CC2CCC1C(=O)C2)Nc1cc2c(Nc3ccc(F)c(Cl)c3)ncnc2s1	7.52288	TRUE	<rdkit.Chem.rdchem.Mol object at 0x7facdf657120>
CHEMBL193681	30	nM	CCc1c(C(=O)NCCCn2ccnc2)cn2ncnc(Nc3ccc4c(cnn4Cc4ccccc4)c3)c12	7.52288	TRUE	<rdkit.Chem.rdchem.Mol object at 0x7facdf657190>
CHEMBL1922905	30	nM	FC(F)(F)c1cccc(Oc2ccc(Nc3ncnc4cc[nH]c34)cc2Cl)c1	7.52288	TRUE	<rdkit.Chem.rdchem.Mol object at 0x7facdf657200>
CHEMBL510845	30	nM	O=C(O[C@H]1CN[C@H](C#Cc2cc3ncnc(Nc4ccc5c(cnn5Cc5cccc(F)c5)c4)c3s2)C1)N1CCOCC1	7.52288	TRUE	<rdkit.Chem.rdchem.Mol object at 0x7facdf657270>
CHEMBL5189852	30	nM	FC(F)(F)c1ccc(/C=C/c2nc(CNc3ccc(Br)cc3)co2)cc1	7.52288	TRUE	<rdkit.Chem.rdchem.Mol object at 0x7facdf6572e0>
CHEMBL3409482	30	nM	CN(CCO)c1cc2c(Nc3ccc4c(cnn4Cc4ccccc4)c3)ncnc2cn1	7.52288	TRUE	<rdkit.Chem.rdchem.Mol object at 0x7facdf657350>
CHEMBL228925	30	nM	CNc1cc2c(Nc3ccc(Oc4ccc(C(=O)NCC(C)(C)C)cc4)c(C)c3)ncnc2cn1	7.52288	TRUE	<rdkit.Chem.rdchem.Mol object at 0x7facdf6573c0>
CHEMBL585304	30	nM	O=C(NO)[C@H]1C[C@@H](OC(=O)N2CCCC2)CN[C@@H]1C(=O)N1CC=C(c2ccccc2)CC1	7.52288	TRUE	<rdkit.Chem.rdchem.Mol object at 0x7facdf657430>
CHEMBL255656	30	nM	CO/N=C/c1c(N)ncnc1Nc1ccc2c(cnn2Cc2cccc(Cl)c2)c1	7.52288	TRUE	<rdkit.Chem.rdchem.Mol object at 0x7facdf6574a0>
CHEMBL258313	31	nM	C[C@@H](Oc1cccc2ncnc(Nc3ccc(OCc4ccccn4)c(Cl)c3)c12)C(=O)N(C)CCO	7.50864	TRUE	<rdkit.Chem.rdchem.Mol object at 0x7facdf657510>
CHEMBL567940	31	nM	CN(C)C(=O)O[C@H]1C[C@H](C(=O)NO)[C@@H](C(=O)N2CCN(c3ccccc3)CC2)N(C)C1	7.50864	TRUE	<rdkit.Chem.rdchem.Mol object at 0x7facdf6575f0>
CHEMBL247104	31	nM	OCCNC1CCN(Cc2ccn3ncnc(Nc4ccc5c(cnn5Cc5cccc(F)c5)c4)c23)CC1	7.50864	TRUE	<rdkit.Chem.rdchem.Mol object at 0x7facdf657660>
CHEMBL3950549	32	nM	COc1cc2ncnc(Nc3ccc(F)c(Cl)c3)c2cc1NC(=O)/C=C/CN(C(C)C)C(C)C	7.49485	TRUE	<rdkit.Chem.rdchem.Mol object at 0x7facdf6576d0>
CHEMBL247710	32	nM	NC1CCN(Cc2ccn3ncnc(Nc4ccc(OCc5cccc(F)c5)c(Cl)c4)c23)CC1	7.49485	TRUE	<rdkit.Chem.rdchem.Mol object at 0x7facdf657740>
CHEMBL504034	32	nM	CS(=O)(=O)CCNC(=O)O[C@H]1CN[C@H](C#Cc2cc3ncnc(Nc4ccc(OCc5cccc(F)c5)c(Cl)c4)c3s2)C1	7.49485	TRUE	<rdkit.Chem.rdchem.Mol object at 0x7facdf6577b0>
CHEMBL207410	32	nM	CNC(=O)c1cccc(C#Cc2cncnc2Nc2ccc(OCc3cccc(F)c3)c(Cl)c2)c1	7.49485	TRUE	<rdkit.Chem.rdchem.Mol object at 0x7facdf657820>
CHEMBL256363	32	nM	C[C@@H](Oc1cccc2ncnc(Nc3ccc4c(cnn4Cc4ccccn4)c3)c12)C(N)=O	7.49485	TRUE	<rdkit.Chem.rdchem.Mol object at 0x7facdf657890>
CHEMBL3814846	32.3	nM	CC(=O)Nc1ccc2ncnc(Nc3ccc(OCc4cccc(F)c4)c(Cl)c3)c2c1	7.4908	TRUE	<rdkit.Chem.rdchem.Mol object at 0x7facdf657900>
CHEMBL91009	33	nM	COCC#CC(=O)Nc1ccc2ncnc(Nc3cccc(Br)c3)c2c1	7.48149	TRUE	<rdkit.Chem.rdchem.Mol object at 0x7facdf6579e0>
CHEMBL1645475	34	nM	NC1CCN(Cc2ccn3ncnc(Nc4cc(Cl)cc(Cl)c4)c23)CC1	7.46852	TRUE	<rdkit.Chem.rdchem.Mol object at 0x7facdf657a50>
CHEMBL428777	34	nM	C[C@@H](Oc1cccc2ncnc(Nc3ccc(OCc4ccccn4)c(Cl)c3)c12)C(=O)N(C)C	7.46852	TRUE	<rdkit.Chem.rdchem.Mol object at 0x7facdf657ac0>
CHEMBL247915	34	nM	NC1CCN(Cc2ccn3ncnc(Nc4ccc5c(cnn5Cc5cccnc5)c4)c23)CC1	7.46852	TRUE	<rdkit.Chem.rdchem.Mol object at 0x7facdf657b30>
CHEMBL500072	35	nM	O=C(O[C@H]1CN[C@H](C#Cc2cc3ncnc(Nc4ccc5c(cnn5Cc5cc(F)ccc5F)c4)c3s2)C1)N1CCOCC1	7.45593	TRUE	<rdkit.Chem.rdchem.Mol object at 0x7facdf657ba0>
CHEMBL430407	35	nM	Cc1ccc(Oc2ccc(Nc3ncnc4cccc(O[C@@H](C)C(=O)N5CCOCC5)c34)cc2C)cn1	7.45593	TRUE	<rdkit.Chem.rdchem.Mol object at 0x7facdf657c80>
CHEMBL247914	35	nM	NC1CCN(Cc2ccn3ncnc(Nc4ccc5c(cnn5Cc5ccccn5)c4)c23)CC1	7.45593	TRUE	<rdkit.Chem.rdchem.Mol object at 0x7facdf657cf0>
CHEMBL3958006	35	nM	O=C(/C=C/CN1CCOCC1)Nc1cc2c(Nc3ccc(F)c(Cl)c3)ncnc2cn1	7.45593	TRUE	<rdkit.Chem.rdchem.Mol object at 0x7facdf657d60>
CHEMBL391387	36	nM	NC1CCN(Cc2ccn3ncnc(Nc4ccc(OCc5cccnc5)c(Cl)c4)c23)CC1	7.4437	TRUE	<rdkit.Chem.rdchem.Mol object at 0x7facdf657dd0>
CHEMBL205966	36	nM	Nc1ccc(C#Cc2cncnc2Nc2ccc(OCc3cccc(F)c3)c(Cl)c2)cc1	7.4437	TRUE	<rdkit.Chem.rdchem.Mol object at 0x7facdf657e40>
CHEMBL4473365	37	nM	C=CC(=O)Nc1cc(Nc2ncc(Cl)c(Nc3ccccc3S(=O)(=O)C(C)C)n2)c(OC)cc1N(C)CCN(C)C	7.4318	TRUE	<rdkit.Chem.rdchem.Mol object at 0x7facdf657eb0>
CHEMBL578044	37	nM	CCC1=C2C(Nc3ccc4c(cnn4Cc4ccccc4)c3)=NC=NC2N=C1NC(=O)OCCC1CCNCC1	7.4318	TRUE	<rdkit.Chem.rdchem.Mol object at 0x7facdf657f20>
CHEMBL328704	38	nM	CCN(CC)CC#CC(=O)Nc1ccc2ncnc(Nc3cccc(Br)c3)c2c1	7.42022	TRUE	<rdkit.Chem.rdchem.Mol object at 0x7facdf657f90>
CHEMBL206003	38	nM	NCc1cccc(C#Cc2cncnc2Nc2ccc(OCc3cccc(F)c3)c(Cl)c2)n1	7.42022	TRUE	<rdkit.Chem.rdchem.Mol object at 0x7facdf658040>
CHEMBL391778	38	nM	NCC1CCN(Cc2ccn3ncnc(Nc4ccc5c(cnn5Cc5cccc(F)c5)c4)c23)CC1	7.42022	TRUE	<rdkit.Chem.rdchem.Mol object at 0x7facdf6580b0>
CHEMBL598164	38.2	nM	C#Cc1cccc(Nc2ncnc3cc(OC)c(OCCCCCC(=O)NO)cc23)c1	7.41794	TRUE	<rdkit.Chem.rdchem.Mol object at 0x7facdf658120>
CHEMBL599398	38.4	nM	C#Cc1cccc(Nc2ncnc3cc(OC)c(OCCCCC(=O)NO)cc23)c1	7.41567	TRUE	<rdkit.Chem.rdchem.Mol object at 0x7facdf658190>
CHEMBL234580	39	nM	O=C1CNCCN(Cc2ccn3ncnc(Nc4ccc5c(cnn5Cc5cccc(F)c5)c4)c23)C1	7.40894	TRUE	<rdkit.Chem.rdchem.Mol object at 0x7facdf658200>
CHEMBL456758	39	nM	COC[C@@H]1CCCN1/N=C/c1c(N)ncnc1Nc1ccc2c(cnn2Cc2cccc(F)c2)c1	7.40894	TRUE	<rdkit.Chem.rdchem.Mol object at 0x7facdf658270>
CHEMBL4474073	39.26	nM	COCCCOc1cc2ncnc(Nc3ccc(F)c(Cl)c3)c2cc1NC(=O)/C=C/CN(C)C	7.40605	TRUE	<rdkit.Chem.rdchem.Mol object at 0x7facdf6582e0>
CHEMBL412367	40	nM	CCc1c(NC(=O)OCCn2ccnc2)cn2ncnc(Nc3ccc4c(cnn4Cc4ccccc4)c3)c12	7.39794	TRUE	<rdkit.Chem.rdchem.Mol object at 0x7facdf658350>
CHEMBL500115	40	nM	CS(=O)(=O)O[C@H]1CN[C@H](C#Cc2cc3ncnc(Nc4ccc(OCc5cccc(F)c5)c(Cl)c4)c3s2)C1	7.39794	TRUE	<rdkit.Chem.rdchem.Mol object at 0x7facdf6583c0>
CHEMBL3233767	40	nM	C=CC(=O)Nc1cc2c(Nc3ccc(F)c(Cl)c3)ncnc2s1	7.39794	TRUE	<rdkit.Chem.rdchem.Mol object at 0x7facdf658430>
CHEMBL196438	40	nM	CCc1c(C(=O)O)cn2ncnc(Nc3ccc4c(cnn4Cc4ccccc4)c3)c12	7.39794	TRUE	<rdkit.Chem.rdchem.Mol object at 0x7facdf6584a0>
CHEMBL1922998	41	nM	FC(F)(F)Oc1cccc(Oc2ccc(Nc3ncnc4cc[nH]c34)cc2Cl)c1	7.38722	TRUE	<rdkit.Chem.rdchem.Mol object at 0x7facdf658510>
CHEMBL245278	41	nM	C[C@H](c1cccc(F)c1)n1ncc2cc(Nc3ncnn4ccc(COC[C@@H]5CNCCO5)c34)ccc21	7.38722	TRUE	<rdkit.Chem.rdchem.Mol object at 0x7facdf658580>
CHEMBL4755977	41	nM	COc1cc2nccc(Oc3ccc(C(=O)Nc4ccccn4)cc3)c2cc1NC(=O)C#CCCN1CCOCC1	7.38722	TRUE	<rdkit.Chem.rdchem.Mol object at 0x7facdf6585f0>
CHEMBL247709	41	nM	Fc1cccc(COc2ccc(Nc3ncnn4ccc(CN5CCCNCC5)c34)cc2Cl)c1	7.38722	TRUE	<rdkit.Chem.rdchem.Mol object at 0x7facdf658660>
CHEMBL584120	42	nM	O=C(NO)[C@H]1C[C@H](OC(=O)N2CCCC2)CN[C@@H]1C(=O)N1CCC(c2ccccc2)CC1	7.37675	TRUE	<rdkit.Chem.rdchem.Mol object at 0x7facdf6586d0>
CHEMBL571040	42	nM	C=CC(=O)N1CCC[C@H]1C(=O)Nc1cc2c(Nc3cccc(Cl)c3F)ncnc2cc1OCCOC	7.37675	TRUE	<rdkit.Chem.rdchem.Mol object at 0x7facdf658740>
CHEMBL256295	42	nM	Nc1ncnc(Nc2ccc3c(cnn3Cc3cccc(F)c3)c2)c1/C=N/O	7.37675	TRUE	<rdkit.Chem.rdchem.Mol object at 0x7facdf6587b0>
CHEMBL5281270	42	nM	CCc1cccc(NC(=O)CSc2nc3cc4ccccc4cc3c(=O)n2-c2ccc(S(N)(=O)=O)cc2)c1	7.37675	TRUE	<rdkit.Chem.rdchem.Mol object at 0x7facdf658820>
CHEMBL4473875	42.11	nM	CCOCCOc1cc2ncnc(Nc3ccc(F)c(Cl)c3)c2cc1NC(=O)/C=C/CN(C)C	7.37561	TRUE	<rdkit.Chem.rdchem.Mol object at 0x7facdf658890>
CHEMBL257411	43	nM	C[C@@H](Oc1cccc2ncnc(Nc3ccc4c(cnn4Cc4nccs4)c3)c12)C(=O)N1CCOCC1	7.36653	TRUE	<rdkit.Chem.rdchem.Mol object at 0x7facdf658900>
CHEMBL393264	43	nM	CC1(N)CCN(Cc2ccn3ncnc(Nc4ccc5c(cnn5Cc5cccc(F)c5)c4)c23)CC1	7.36653	TRUE	<rdkit.Chem.rdchem.Mol object at 0x7facdf658970>
CHEMBL255968	43	nM	C[C@H](Oc1cccc2ncnc(Nc3ccc(OCc4ccccn4)c(Cl)c3)c12)C(=O)N(C)C	7.36653	TRUE	<rdkit.Chem.rdchem.Mol object at 0x7facdf6589e0>
CHEMBL391181	43	nM	COc1cn2ncnc(Nc3ccc4c(cnn4Cc4cccc(F)c4)c3)c2c1CN1CCC(N)CC1	7.36653	TRUE	<rdkit.Chem.rdchem.Mol object at 0x7facdf658a50>
CHEMBL506414	43	nM	Fc1cccc(COc2ccc(Nc3ncnc4sc(-c5cccs5)cc34)cc2Cl)c1	7.36653	TRUE	<rdkit.Chem.rdchem.Mol object at 0x7facdf658ac0>
CHEMBL604094	43.5	nM	O=C(CCCCCCOc1ccc2ncnc(Nc3ccc(F)c(Cl)c3)c2c1)NO	7.36151	TRUE	<rdkit.Chem.rdchem.Mol object at 0x7facdf658b30>
CHEMBL255865	44	nM	CO/N=C/c1c(N)ncnc1Nc1ccc2c(cnn2Cc2cccc(C#N)c2)c1	7.35655	TRUE	<rdkit.Chem.rdchem.Mol object at 0x7facdf658ba0>
CHEMBL566337	44	nM	CCC1=C2C(Nc3ccc4c(cnn4Cc4ccccc4)c3)=NC=NC2N=C1NC(=O)OCCn1ccnc1	7.35655	TRUE	<rdkit.Chem.rdchem.Mol object at 0x7facdf658c10>
CHEMBL205235	44	nM	Nc1cccc(C#Cc2cncnc2Nc2ccc(OCc3cccc(F)c3)c(Cl)c2)c1	7.35655	TRUE	<rdkit.Chem.rdchem.Mol object at 0x7facdf658c80>
CHEMBL455208	44	nM	COc1ccccc1Cc1nc2ccc(-c3nn([C@H]4CC[C@H](N5CCNCC5)CC4)c4ncnc(N)c34)cc2[nH]1	7.35655	TRUE	<rdkit.Chem.rdchem.Mol object at 0x7facdf658cf0>
CHEMBL584334	44.5	nM	CN1C[C@@H](OC(=O)N2CCC2)C[C@H](C(=O)NO)[C@H]1C(=O)N1CCN(c2ccccc2)CC1	7.35164	TRUE	<rdkit.Chem.rdchem.Mol object at 0x7facdf658d60>
CHEMBL2105719	46	nM	COc1cc2ncnc(Nc3ccc(F)c(Cl)c3)c2cc1NC(=O)/C=C/CN1CCCCC1.O	7.33724	TRUE	<rdkit.Chem.rdchem.Mol object at 0x7facdf658dd0>
CHEMBL373207	46	nM	CCN(CC)CC#CC(=O)Nc1ccc2ncnc(Nc3ccc(F)c(Cl)c3)c2c1	7.33724	TRUE	<rdkit.Chem.rdchem.Mol object at 0x7facdf658e40>
CHEMBL2110732	46	nM	COc1cc2ncnc(Nc3ccc(F)c(Cl)c3)c2cc1NC(=O)/C=C/CN1CCCCC1	7.33724	TRUE	<rdkit.Chem.rdchem.Mol object at 0x7facdf658eb0>
CHEMBL391321	47	nM	OCCNCc1ccn2ncnc(Nc3ccc4c(cnn4Cc4cccc(F)c4)c3)c12	7.3279	TRUE	<rdkit.Chem.rdchem.Mol object at 0x7facdf658f20>
CHEMBL204467	47	nM	OCc1ccc(C#Cc2cncnc2Nc2ccc(OCc3cccc(F)c3)c(Cl)c2)o1	7.3279	TRUE	<rdkit.Chem.rdchem.Mol object at 0x7facdf658f90>
CHEMBL228926	48	nM	Cc1cc(Nc2ncnc3cnc(N(C)C)cc23)ccc1Oc1ccc(C(=O)NCC(C)(C)C)cc1	7.31876	TRUE	<rdkit.Chem.rdchem.Mol object at 0x7facdf659040>
CHEMBL3896067	50	nM	COc1cc2c(Nc3ccc(Br)c(Cl)c3)ncnc2cc1O[C@H]1CO[C@H]2[C@@H]1OC[C@@H]2S(C)(=O)=O	7.30103	TRUE	<rdkit.Chem.rdchem.Mol object at 0x7facdf6590b0>
CHEMBL3910031	50	nM	COc1cc2c(Nc3ccc(Br)c(Cl)c3)ncnc2cc1O[C@H]1CO[C@H]2[C@@H]1OC[C@@H]2OC	7.30103	TRUE	<rdkit.Chem.rdchem.Mol object at 0x7facdf659120>
CHEMBL3907230	50	nM	CCO[C@H]1CO[C@H]2[C@@H]1OC[C@@H]2Oc1cc2ncnc(Nc3ccc(Br)c(Cl)c3)c2cc1OC	7.30103	TRUE	<rdkit.Chem.rdchem.Mol object at 0x7facdf659190>
CHEMBL3921689	50	nM	COc1cc2c(Nc3ccc(Br)c(Cl)c3)ncnc2cc1O[C@H]1CO[C@H]2[C@@H]1OC[C@@H]2OC(F)F	7.30103	TRUE	<rdkit.Chem.rdchem.Mol object at 0x7facdf659200>
CHEMBL3922278	50	nM	COc1cc2c(Nc3ccc(F)c(Cl)c3F)ncnc2cc1OC[C@@H]1CN2CCC[C@H]2CO1	7.30103	TRUE	<rdkit.Chem.rdchem.Mol object at 0x7facdf659270>
CHEMBL3932115	50	nM	COc1cc2c(Nc3ccc(Br)c(Cl)c3)ncnc2cc1O[C@H]1CO[C@@H]2CCO[C@H]12	7.30103	TRUE	<rdkit.Chem.rdchem.Mol object at 0x7facdf6592e0>
CHEMBL3945353	50	nM	COc1cc2c(Nc3ccc(Cl)c(Cl)c3)ncnc2cc1OCc1nc2c(s1)CNCC2	7.30103	TRUE	<rdkit.Chem.rdchem.Mol object at 0x7facdf659350>
CHEMBL3928696	50	nM	COc1cc2c(Nc3ccc(Cl)c(Cl)c3)ncnc2cc1OCC1CC1	7.30103	TRUE	<rdkit.Chem.rdchem.Mol object at 0x7facdf6593c0>
CHEMBL3945028	50	nM	COc1cc2c(Nc3ccc(Br)c(Cl)c3)ncnc2cc1O[C@@H]1CO[C@H]2[C@@H]1OC[C@@H]2O	7.30103	TRUE	<rdkit.Chem.rdchem.Mol object at 0x7facdf659430>
CHEMBL3919145	50	nM	COc1cc2c(Nc3ccc(Cl)c(Cl)c3)ncnc2cc1O[C@@H]1C[C@H]2OC[C@H](OC)[C@H]2O1	7.30103	TRUE	<rdkit.Chem.rdchem.Mol object at 0x7facdf6594a0>
CHEMBL275762	50	nM	O=C(CCl)Nc1ccc2ncnc(Nc3cc(Cl)c(Cl)cc3F)c2c1	7.30103	TRUE	<rdkit.Chem.rdchem.Mol object at 0x7facdf659510>
CHEMBL190094	50	nM	CN(C)C/C=C/C(=O)Nc1ccc2ncnc(Nc3cc(Cl)c(Cl)cc3F)c2c1	7.30103	TRUE	<rdkit.Chem.rdchem.Mol object at 0x7facdf659580>
CHEMBL3949434	50	nM	COc1cc2c(Nc3ccc(Cl)c(Cl)c3)ncnc2cc1OC[C@@H]1O[C@@H](OC)[C@@H](O)[C@H](O)[C@H]1O	7.30103	TRUE	<rdkit.Chem.rdchem.Mol object at 0x7facdf6595f0>
CHEMBL3964605	50	nM	COc1cc2c(Nc3ccc(Br)c(Cl)c3)ncnc2cc1O[C@@H]1C[C@H]2OCC3(OCCO3)[C@H]2O1	7.30103	TRUE	<rdkit.Chem.rdchem.Mol object at 0x7facdf659660>
CHEMBL3964556	50	nM	COc1cc2c(Nc3ccc(Cl)c(Cl)c3)ncnc2cc1O[C@H]1CO[C@H]2[C@@H]1OC[C@@H]2OC	7.30103	TRUE	<rdkit.Chem.rdchem.Mol object at 0x7facdf6596d0>
CHEMBL3936151	50	nM	CCN1CCOC(COc2cc3ncnc(Nc4ccc(Cl)c(Cl)c4)c3cc2OC)C1	7.30103	TRUE	<rdkit.Chem.rdchem.Mol object at 0x7facdf659740>
CHEMBL3893363	50	nM	COc1cc2c(Nc3ccc(Br)c(Cl)c3)ncnc2cc1O[C@H]1CO[C@H]2[C@@H]1OC[C@@H]2O	7.30103	TRUE	<rdkit.Chem.rdchem.Mol object at 0x7facdf6597b0>
CHEMBL3935851	50	nM	COc1cc2c(Nc3ccc(Br)c(Cl)c3F)ncnc2cc1OC[C@@H]1CN(C)CC(=O)N1	7.30103	TRUE	<rdkit.Chem.rdchem.Mol object at 0x7facdf659820>
CHEMBL3983938	50	nM	CCN1CCCOC(COc2cc3ncnc(Nc4ccc(Cl)c(Cl)c4)c3cc2OC)C1	7.30103	TRUE	<rdkit.Chem.rdchem.Mol object at 0x7facdf659890>
CHEMBL3928883	50	nM	COc1cc2c(Nc3ccc(Cl)c(Cl)c3)ncnc2cc1OC[C@@H]1CN2CCC[C@H]2CO1	7.30103	TRUE	<rdkit.Chem.rdchem.Mol object at 0x7facdf659900>
CHEMBL3914599	50	nM	CCCN1CCCOC(COc2cc3ncnc(Nc4ccc(Cl)c(Cl)c4)c3cc2OC)C1	7.30103	TRUE	<rdkit.Chem.rdchem.Mol object at 0x7facdf659970>
CHEMBL3944791	50	nM	COc1cc2c(Nc3ccc(Cl)c(Cl)c3Cl)ncnc2cc1OCC1CN(C)CCO1	7.30103	TRUE	<rdkit.Chem.rdchem.Mol object at 0x7facdf6599e0>
CHEMBL3961005	50	nM	COc1cc2c(Nc3ccc(Br)c(Cl)c3F)ncnc2cc1O[C@@H]1C[C@H]2OC[C@H](OC)[C@H]2O1	7.30103	TRUE	<rdkit.Chem.rdchem.Mol object at 0x7facdf659a50>
CHEMBL3919051	50	nM	CCCCN1CCOC(COc2cc3ncnc(Nc4ccc(Cl)c(Cl)c4)c3cc2OC)C1	7.30103	TRUE	<rdkit.Chem.rdchem.Mol object at 0x7facdf659ac0>
CHEMBL3916225	50	nM	COc1cc2c(Nc3ccc(C)c(Br)c3)ncnc2cc1OCC1CN(C)CCO1	7.30103	TRUE	<rdkit.Chem.rdchem.Mol object at 0x7facdf659b30>
CHEMBL3946242	50	nM	COc1cc2c(Nc3ccc(F)c(Cl)c3F)ncnc2cc1OC[C@@H]1CN2CCOC[C@H]2CO1	7.30103	TRUE	<rdkit.Chem.rdchem.Mol object at 0x7facdf659ba0>
CHEMBL3908311	50	nM	COc1cc2c(Nc3cc(Cl)c(Cl)cc3F)ncnc2cc1OC[C@@H]1CN2CCOC[C@H]2CO1	7.30103	TRUE	<rdkit.Chem.rdchem.Mol object at 0x7facdf659c10>
CHEMBL3986404	50	nM	COc1cc2c(Nc3ccc(Cl)c(Cl)c3F)ncnc2cc1O[C@@H]1C[C@H]2OC[C@H](OC)[C@H]2O1	7.30103	TRUE	<rdkit.Chem.rdchem.Mol object at 0x7facdf659c80>
CHEMBL3906715	50	nM	COc1cc2c(Nc3cc(Cl)c(Cl)c(Cl)c3)ncnc2cc1OCC1CN(C)CCO1	7.30103	TRUE	<rdkit.Chem.rdchem.Mol object at 0x7facdf659cf0>
CHEMBL3920036	50	nM	COc1cc2c(Nc3ccc(Cl)c(Cl)c3)ncnc2cc1OC1C[C@@H]2CN(C)C[C@@H]2C1	7.30103	TRUE	<rdkit.Chem.rdchem.Mol object at 0x7facdf659d60>
CHEMBL3968233	50	nM	COc1cc2c(Nc3cc(Cl)c(Cl)cc3F)ncnc2cc1OCC1CN(C)CCO1	7.30103	TRUE	<rdkit.Chem.rdchem.Mol object at 0x7facdf659dd0>
CHEMBL3895129	50	nM	COc1cc2c(Nc3ccc(F)c(Cl)c3F)ncnc2cc1OCC1CN(C)C(C)(C)CO1	7.30103	TRUE	<rdkit.Chem.rdchem.Mol object at 0x7facdf659e40>
CHEMBL3971781	50	nM	COc1cc2c(Nc3ccc(Cl)c(Cl)c3F)ncnc2cc1OC[C@H]1CN2CCOC[C@H]2CO1	7.30103	TRUE	<rdkit.Chem.rdchem.Mol object at 0x7facdf659eb0>
CHEMBL3924147	50	nM	COc1cc2c(Nc3cc(Cl)c(Br)cc3F)ncnc2cc1OC[C@@H]1CN2CCOC[C@H]2CO1	7.30103	TRUE	<rdkit.Chem.rdchem.Mol object at 0x7facdf659f20>
CHEMBL3958721	50	nM	COc1cc2c(Nc3ccc(Br)c(Cl)c3)ncnc2cc1O[C@@H]1CO[C@H]2[C@@H]1OC[C@@H]2NC(F)(F)F	7.30103	TRUE	<rdkit.Chem.rdchem.Mol object at 0x7facdf659f90>
CHEMBL3931427	50	nM	COc1cc2c(Nc3cc(Cl)c(Cl)cc3F)ncnc2cc1OC[C@@H]1CO[C@H]2[C@@H]1OC[C@@H]2OC	7.30103	TRUE	<rdkit.Chem.rdchem.Mol object at 0x7facdf65a040>
CHEMBL3945177	50	nM	COc1cc2c(Nc3ccc(Br)c(Cl)c3)ncnc2cc1OCC1CN(C)CCO1	7.30103	TRUE	<rdkit.Chem.rdchem.Mol object at 0x7facdf65a120>
CHEMBL3934095	50	nM	COc1cc2c(Nc3ccc(Br)c(C)c3)ncnc2cc1OCC1CN(C)CCO1	7.30103	TRUE	<rdkit.Chem.rdchem.Mol object at 0x7facdf65a190>
CHEMBL3914189	50	nM	COc1cc2c(Nc3ccc(Cl)c(Cl)c3)ncnc2cc1OCC1CNCC(C)(C)O1	7.30103	TRUE	<rdkit.Chem.rdchem.Mol object at 0x7facdf65a200>
CHEMBL3893416	50	nM	COc1cc2c(Nc3ccc(Cl)c(Cl)c3)ncnc2cc1OC[C@@H]1CO[C@H]2[C@@H]1OC[C@@H]2OC	7.30103	TRUE	<rdkit.Chem.rdchem.Mol object at 0x7facdf65a270>
CHEMBL3943734	50	nM	COc1cc2c(Nc3ccc(Br)c(Cl)c3)ncnc2cc1O[C@@H]1CO[C@H]2[C@@H]1OC[C@@H]2NS(C)(=O)=O	7.30103	TRUE	<rdkit.Chem.rdchem.Mol object at 0x7facdf65a2e0>
CHEMBL3928601	50	nM	COc1cc2c(Nc3ccc(Cl)c(Cl)c3)ncnc2cc1OCC1CN(C)CC(C)(C)O1	7.30103	TRUE	<rdkit.Chem.rdchem.Mol object at 0x7facdf65a350>
CHEMBL3933130	50	nM	COc1cc2c(Nc3ccc(Cl)c(Cl)c3F)ncnc2cc1OC[C@@H]1CN(C)CC(=O)N1	7.30103	TRUE	<rdkit.Chem.rdchem.Mol object at 0x7facdf65a3c0>
CHEMBL3959774	50	nM	COc1cc2c(Nc3ccc(Cl)c(Cl)c3F)ncnc2cc1OC[C@@H]1CN2CCC[C@H]2CO1	7.30103	TRUE	<rdkit.Chem.rdchem.Mol object at 0x7facdf65a430>
CHEMBL3896122	50	nM	COc1cc2c(Nc3cc(Cl)c(Cl)cc3F)ncnc2cc1OC[C@@H]1CN2CCC[C@H]2CO1	7.30103	TRUE	<rdkit.Chem.rdchem.Mol object at 0x7facdf65a4a0>
CHEMBL3955359	50	nM	COc1cc2c(Nc3cccc(Cl)c3F)ncnc2cc1O[C@H]1CO[C@H]2[C@@H]1OC[C@@H]2OC	7.30103	TRUE	<rdkit.Chem.rdchem.Mol object at 0x7facdf65a510>
CHEMBL3977450	50	nM	COc1cc2c(Nc3cc(Cl)c(Cl)cc3F)ncnc2cc1OC[C@H]1CN2CCOC[C@H]2CO1	7.30103	TRUE	<rdkit.Chem.rdchem.Mol object at 0x7facdf65a580>
CHEMBL507821	50	nM	O=C(O[C@H]1CN[C@H](C#Cc2cc3ncnc(Nc4ccc5c(cnn5Cc5ccccc5)c4)c3s2)C1)N1CCOCC1	7.30103	TRUE	<rdkit.Chem.rdchem.Mol object at 0x7facdf65a5f0>
CHEMBL3914441	50	nM	COc1cc2c(Nc3ccc(Br)c(Cl)c3F)ncnc2cc1OC[C@H]1CN2CCOC[C@H]2CO1	7.30103	TRUE	<rdkit.Chem.rdchem.Mol object at 0x7facdf65a660>
CHEMBL3923692	50	nM	COc1cc2c(Nc3ccc(Cl)c(Cl)c3)ncnc2cc1OCC1CN(S(=O)(=O)CCCCl)CCO1	7.30103	TRUE	<rdkit.Chem.rdchem.Mol object at 0x7facdf65a6d0>
CHEMBL3917220	50	nM	COc1cc2c(Nc3ccc(Cl)c(Cl)c3)ncnc2cc1OC[C@H]1CN2CCC[C@@H]2CO1	7.30103	TRUE	<rdkit.Chem.rdchem.Mol object at 0x7facdf65a740>
CHEMBL3955083	50	nM	COc1cc2c(Nc3cc(F)c(Br)c(F)c3)ncnc2cc1OCC1CN(C)CCO1	7.30103	TRUE	<rdkit.Chem.rdchem.Mol object at 0x7facdf65a7b0>
CHEMBL3939133	50	nM	COc1cc2c(Nc3ccc(Cl)c(Cl)c3)ncnc2cc1OCCC1CN(C)CC(C)(C)O1	7.30103	TRUE	<rdkit.Chem.rdchem.Mol object at 0x7facdf65a820>
CHEMBL3941947	50	nM	COc1cc2c(Nc3ccc(Br)c(F)c3F)ncnc2cc1OCC1CN(C)CCO1	7.30103	TRUE	<rdkit.Chem.rdchem.Mol object at 0x7facdf65a890>
CHEMBL3952465	50	nM	COc1cc2c(Nc3cc(F)c(Br)cc3F)ncnc2cc1OCC1CN(C)CCO1	7.30103	TRUE	<rdkit.Chem.rdchem.Mol object at 0x7facdf65a900>
CHEMBL3959516	50	nM	COc1cc2c(Nc3cc(Cl)c(Br)cc3F)ncnc2cc1OC[C@H]1CN2CCOC[C@H]2CO1	7.30103	TRUE	<rdkit.Chem.rdchem.Mol object at 0x7facdf65a970>
CHEMBL3937048	50	nM	COc1cc2c(Nc3cccc(Cl)c3F)ncnc2cc1O[C@H]1CO[C@H]2[C@@H]1OC[C@@H]2F	7.30103	TRUE	<rdkit.Chem.rdchem.Mol object at 0x7facdf65a9e0>
CHEMBL3939828	50	nM	COc1cc2c(Nc3ccc(Br)c(Cl)c3)ncnc2cc1O[C@@H]1CCOC1	7.30103	TRUE	<rdkit.Chem.rdchem.Mol object at 0x7facdf65aa50>
CHEMBL3924098	50	nM	COc1cc2c(Nc3ccc(Br)c(Cl)c3C)ncnc2cc1OCC1CN(C)CCO1	7.30103	TRUE	<rdkit.Chem.rdchem.Mol object at 0x7facdf65aac0>
CHEMBL3917294	50	nM	COc1cc2c(Nc3ccc(Cl)c(Cl)c3)ncnc2cc1OCC1CN2CSC[C@H]2CO1	7.30103	TRUE	<rdkit.Chem.rdchem.Mol object at 0x7facdf65ab30>
CHEMBL3958898	50	nM	COc1cc2c(Nc3cc(Cl)c(Br)cc3F)ncnc2cc1OCC1COCCN1C	7.30103	TRUE	<rdkit.Chem.rdchem.Mol object at 0x7facdf65aba0>
CHEMBL3947712	50	nM	COc1cc2c(Nc3ccc(Cl)c(Cl)c3F)ncnc2cc1OC[C@@H]1CN2CCC[C@H]2C(=O)N1	7.30103	TRUE	<rdkit.Chem.rdchem.Mol object at 0x7facdf65ac10>
CHEMBL3893846	50	nM	COc1cc2c(Nc3ccc(Cl)c(Cl)c3)ncnc2cc1OCC1CN(C)C(C)(C)C(=O)O1	7.30103	TRUE	<rdkit.Chem.rdchem.Mol object at 0x7facdf65ac80>
CHEMBL3959495	50	nM	COc1cc2c(Nc3ccc(Cl)c(Cl)c3)ncnc2cc1OCCC1CN(C)C(C)(C)CO1	7.30103	TRUE	<rdkit.Chem.rdchem.Mol object at 0x7facdf65acf0>
CHEMBL3916828	50	nM	COc1cc2c(N[C@H]3COC[C@@H]3OC)ncnc2cc1O[C@H]1CO[C@H]2[C@@H]1OC[C@@H]2O	7.30103	TRUE	<rdkit.Chem.rdchem.Mol object at 0x7facdf65ad60>
CHEMBL3962203	50	nM	COc1cc2c(Nc3ccc(Cl)c(Cl)c3)ncnc2cc1OCCC1CNC(C)(C)CO1	7.30103	TRUE	<rdkit.Chem.rdchem.Mol object at 0x7facdf65add0>
CHEMBL3956820	50	nM	COc1cc2c(Nc3ccc(F)c(Cl)c3F)ncnc2cc1OC[C@H]1CN2CCOC[C@H]2CO1	7.30103	TRUE	<rdkit.Chem.rdchem.Mol object at 0x7facdf65ae40>
CHEMBL569389	50.5	nM	CN1C[C@@H](OC(=O)N2CCC(F)(F)C2)C[C@H](C(=O)NO)[C@H]1C(=O)N1CCN(c2ccccc2)CC1	7.29671	TRUE	<rdkit.Chem.rdchem.Mol object at 0x7facdf65aeb0>
CHEMBL256576	51	nM	C[C@@H](Oc1cccc2ncnc(Nc3ccc4c(cnn4Cc4ccccn4)c3)c12)C(=O)N1CCOCC1	7.29243	TRUE	<rdkit.Chem.rdchem.Mol object at 0x7facdf65af20>
CHEMBL231100	51	nM	Cc1cc(Nc2ncnc3cnc(N(C)C)cc23)ccc1OC1CCN(C(=O)CC(C)(C)C)CC1	7.29243	TRUE	<rdkit.Chem.rdchem.Mol object at 0x7facdf65af90>
CHEMBL598611	51.6	nM	C#Cc1cccc(Nc2ncnc3cc(OCCCCCCC(=O)NO)c(OC)cc23)c1	7.28735	TRUE	<rdkit.Chem.rdchem.Mol object at 0x7facdf65b040>
CHEMBL567939	52	nM	CC(C)C(=O)N(C)C1CN[C@H](C(=O)N2CC[C@H](c3ccccc3)C2)[C@@H](C(=O)NO)C1	7.284	TRUE	<rdkit.Chem.rdchem.Mol object at 0x7facdf65b0b0>
CHEMBL246687	52	nM	N[C@H]1CCN(Cc2ccn3ncnc(Nc4ccc5c(cnn5Cc5cccc(F)c5)c4)c23)C1	7.284	TRUE	<rdkit.Chem.rdchem.Mol object at 0x7facdf65b120>
CHEMBL221857	52	nM	O=C(NO)[C@H]1CC2(CC2)CN[C@@H]1C(=O)N1CCN(c2ccccc2)CC1	7.284	TRUE	<rdkit.Chem.rdchem.Mol object at 0x7facdf65b190>
CHEMBL437584	53	nM	COc1ccccc1Cc1nc2ccc(-c3nn([C@H]4CC[C@H](N5CCOCC5)CC4)c4ncnc(N)c34)cc2[nH]1	7.27572	TRUE	<rdkit.Chem.rdchem.Mol object at 0x7facdf65b200>
CHEMBL93386	53	nM	O=C(C#CCN1CCOCC1)Nc1ccc2ncnc(Nc3cccc(Br)c3)c2c1	7.27572	TRUE	<rdkit.Chem.rdchem.Mol object at 0x7facdf65b270>
CHEMBL391779	54	nM	CNC1CCN(Cc2ccn3ncnc(Nc4ccc5c(cnn5Cc5cccc(F)c5)c4)c23)CC1	7.26761	TRUE	<rdkit.Chem.rdchem.Mol object at 0x7facdf65b2e0>
CHEMBL4437943	54	nM	O=C(CCSC(=S)N1CCN(c2ccccc2)CC1)Nc1cccc(NC(=O)c2ccccn2)c1	7.26761	TRUE	<rdkit.Chem.rdchem.Mol object at 0x7facdf65b350>
CHEMBL443098	54	nM	COCCCN1CCN([C@H]2CC[C@H](n3nc(-c4ccc5nc(Cc6ccccc6OC)[nH]c5c4)c4c(N)ncnc43)CC2)CC1	7.26761	TRUE	<rdkit.Chem.rdchem.Mol object at 0x7facdf65b3c0>
CHEMBL495979	54	nM	Fc1cccc(COc2ccc(Nc3ncnc4cc(C#C[C@@H]5CCCN5)sc34)cc2Cl)c1	7.26761	TRUE	<rdkit.Chem.rdchem.Mol object at 0x7facdf65b430>
CHEMBL246284	55	nM	Fc1cccc(Cn2ncc3cc(Nc4ncnn5ccc(COC[C@@H]6CNCCO6)c45)ccc32)c1	7.25964	TRUE	<rdkit.Chem.rdchem.Mol object at 0x7facdf65b4a0>
CHEMBL1922906	55	nM	FC(F)(F)Oc1ccccc1Oc1ccc(Nc2ncnc3cc[nH]c23)cc1Cl	7.25964	TRUE	<rdkit.Chem.rdchem.Mol object at 0x7facdf65b510>
CHEMBL205045	55	nM	Fc1cccc(COc2ccc(Nc3ncncc3C#Cc3ccccn3)cc2Cl)c1	7.25964	TRUE	<rdkit.Chem.rdchem.Mol object at 0x7facdf65b580>
CHEMBL371888	56	nM	COc1cc2ncnc(Nc3ccc(OCc4ccccn4)c(C)c3)c2cc1OC	7.25181	TRUE	<rdkit.Chem.rdchem.Mol object at 0x7facdf65b5f0>
CHEMBL256994	57	nM	CNC(=O)[C@@H](C)Oc1cccc2ncnc(Nc3ccc4c(cnn4Cc4cccc(F)c4)c3)c12	7.24413	TRUE	<rdkit.Chem.rdchem.Mol object at 0x7facdf65b660>
CHEMBL452717	59	nM	COc1ccccc1Cc1nc2ccc(-c3nn([C@H]4CC[C@H](N5CCN(C(C)=O)CC5)CC4)c4ncnc(N)c34)cc2[nH]1	7.22915	TRUE	<rdkit.Chem.rdchem.Mol object at 0x7facdf65b6d0>
CHEMBL205765	59	nM	CC(=O)Nc1cccc(C#Cc2cncnc2Nc2ccc(OCc3cccc(F)c3)c(Cl)c2)n1	7.22915	TRUE	<rdkit.Chem.rdchem.Mol object at 0x7facdf65b740>
CHEMBL256364	59	nM	CNC(=O)[C@@H](C)Oc1cccc2ncnc(Nc3ccc4c(cnn4Cc4ccccn4)c3)c12	7.22915	TRUE	<rdkit.Chem.rdchem.Mol object at 0x7facdf65b7b0>
CHEMBL455434	60	nM	O=C(O[C@H]1CN[C@H](C#Cc2cc3ncnc(Nc4ccc(Cc5ccccc5)cc4)c3s2)C1)N1CCOCC1	7.22185	TRUE	<rdkit.Chem.rdchem.Mol object at 0x7facdf65b820>
CHEMBL245667	60	nM	NCCCOCc1ccn2ncnc(Nc3ccc4c(cnn4Cc4cccc(F)c4)c3)c12	7.22185	TRUE	<rdkit.Chem.rdchem.Mol object at 0x7facdf65b890>
CHEMBL497026	60	nM	O=C(NO)[C@H]1CC(CC(=O)N2CCCCC2)CC[C@@H]1C(=O)N1CCN(c2ccccc2)CC1	7.22185	TRUE	<rdkit.Chem.rdchem.Mol object at 0x7facdf65b900>
CHEMBL207869	60	nM	Fc1cccc(COc2ccc(Nc3ncncc3C#Cc3ncccn3)cc2Cl)c1	7.22185	TRUE	<rdkit.Chem.rdchem.Mol object at 0x7facdf65b970>
CHEMBL1923002	60	nM	Cc1ccc(Oc2ccc(Nc3ncnc4cc[nH]c34)cc2C)cn1	7.22185	TRUE	<rdkit.Chem.rdchem.Mol object at 0x7facdf65ba50>
CHEMBL500217	60	nM	O=C(O[C@H]1CN[C@H](C#Cc2cc3ncnc(Nc4ccc5c(ccn5Cc5ccccc5)c4)c3s2)C1)N1CCOCC1	7.22185	TRUE	<rdkit.Chem.rdchem.Mol object at 0x7facdf65bac0>
CHEMBL428046	60	nM	Fc1cccc(Cn2ncc3cc(Nc4ncnn5ccc(COC[C@H]6CNCCO6)c45)ccc32)c1	7.22185	TRUE	<rdkit.Chem.rdchem.Mol object at 0x7facdf65bb30>
CHEMBL248115	60	nM	Cc1cncc(COc2ccc(Nc3ncnn4ccc(CN5CCC(N)CC5)c34)cc2Cl)c1	7.22185	TRUE	<rdkit.Chem.rdchem.Mol object at 0x7facdf65bba0>
CHEMBL453398	60	nM	O=C(O[C@H]1CN[C@H](C#Cc2cc3ncnc(Nc4ccc(Oc5ccccn5)c(Cl)c4)c3s2)C1)N1CCOCC1	7.22185	TRUE	<rdkit.Chem.rdchem.Mol object at 0x7facdf65bc10>
CHEMBL3948267	62	nM	O=C(/C=C/CN1CCCC1)Nc1cc2c(Nc3ccc4c(cnn4Cc4ccccc4)c3)ncnc2cn1	7.20761	TRUE	<rdkit.Chem.rdchem.Mol object at 0x7facdf65bc80>
CHEMBL3949347	62	nM	CN(C)C/C=C/C(=O)Nc1cc2c(Nc3ccc4c(cnn4Cc4ccccc4)c3)ncnc2cn1	7.20761	TRUE	<rdkit.Chem.rdchem.Mol object at 0x7facdf65bcf0>
CHEMBL5180725	62.26	nM	Cc1cc(Nc2c(C#N)cnc3ccc(NC(=O)/C=C/CN(C)C)cc23)ccc1Oc1cc2nncn2cn1	7.20579	TRUE	<rdkit.Chem.rdchem.Mol object at 0x7facdf65bd60>
CHEMBL401443	63	nM	OC1CCN(Cc2ccn3ncnc(Nc4ccc5c(cnn5Cc5cccc(F)c5)c4)c23)CC1	7.20066	TRUE	<rdkit.Chem.rdchem.Mol object at 0x7facdf65bdd0>
CHEMBL4437803	64	nM	O=C(Nc1cccc(NC(=O)c2ccccn2)c1)NC1CCCCC1	7.19382	TRUE	<rdkit.Chem.rdchem.Mol object at 0x7facdf65be40>
CHEMBL205284	66	nM	Fc1cccc(COc2ccc(Nc3ncncc3C#Cc3cc[nH]n3)cc2Cl)c1	7.18046	TRUE	<rdkit.Chem.rdchem.Mol object at 0x7facdf65beb0>
CHEMBL403594	66	nM	CNC(=O)[C@@H](C)Oc1cccc2ncnc(Nc3ccc(OCc4ccccn4)c(Cl)c3)c12	7.18046	TRUE	<rdkit.Chem.rdchem.Mol object at 0x7facdf65bf20>
CHEMBL3218000	66	nM	C#Cc1cccc(Nc2ncnc3ccc(OCc4ccc(C(=O)Nc5ccccc5N)cc4)cc23)c1	7.18046	TRUE	<rdkit.Chem.rdchem.Mol object at 0x7facdf65bf90>
CHEMBL3133822	66	nM	Clc1cccc(Nc2ccnc3[nH]c4ccccc4c23)c1	7.18046	TRUE	<rdkit.Chem.rdchem.Mol object at 0x7facdf65c040>
CHEMBL202421	67	nM	CCCCN(CC#CC(=O)Nc1cc2c(Nc3ccc(F)c(Cl)c3)ncnc2cn1)CCCC	7.17393	TRUE	<rdkit.Chem.rdchem.Mol object at 0x7facdf65c0b0>
CHEMBL496829	67	nM	CC(C)c1cccc(C2CCN(C(=O)[C@H]3CC[C@H](CC(=O)N4CCCCC4)C[C@@H]3C(=O)NO)CC2)c1	7.17393	TRUE	<rdkit.Chem.rdchem.Mol object at 0x7facdf65c120>
CHEMBL380078	69	nM	CNC(=O)NCc1cccc(C#Cc2cncnc2Nc2ccc(OCc3cccc(F)c3)c(Cl)c2)n1	7.16115	TRUE	<rdkit.Chem.rdchem.Mol object at 0x7facdf65c190>
CHEMBL257478	69	nM	Cc1ccc(Oc2ccc(Nc3ncnc4cccc(O[C@H](C)C(=O)N(C)CCO)c34)cc2C)cn1	7.16115	TRUE	<rdkit.Chem.rdchem.Mol object at 0x7facdf65c200>
CHEMBL245869	70	nM	Fc1cccc(Cn2ncc3cc(Nc4ncnn5ccc(COC6CCNCC6)c45)ccc32)c1	7.1549	TRUE	<rdkit.Chem.rdchem.Mol object at 0x7facdf65c270>
CHEMBL1683972	70	nM	Cc1ncnc(Nc2ccc(OCc3cccc(F)c3)c(Cl)c2)c1C#C/C=N/OCCN1CCOCC1	7.1549	TRUE	<rdkit.Chem.rdchem.Mol object at 0x7facdf65c2e0>
CHEMBL586042	70	nM	O=C(NO)[C@H]1CC(OC(=O)N2CCCC2)CN[C@@H]1C(=O)N1Cc2ccccc2C1	7.1549	TRUE	<rdkit.Chem.rdchem.Mol object at 0x7facdf65c350>
CHEMBL393848	70	nM	N[C@@H]1CCN(Cc2ccn3ncnc(Nc4ccc5c(cnn5Cc5cccc(F)c5)c4)c23)C1	7.1549	TRUE	<rdkit.Chem.rdchem.Mol object at 0x7facdf65c3c0>
CHEMBL194337	70	nM	CN1CCC(Oc2cccc3ncnc(Nc4ccc(OCc5ccccn5)cc4)c23)CC1	7.1549	TRUE	<rdkit.Chem.rdchem.Mol object at 0x7facdf65c430>
CHEMBL1645477	70	nM	COc1ccc(Nc2ncnn3ccc(CN4CCC(N)CC4)c23)cc1Cl	7.1549	TRUE	<rdkit.Chem.rdchem.Mol object at 0x7facdf65c4a0>
CHEMBL1683968	71	nM	Cc1ncnc(Nc2ccc(OCc3cccc(F)c3)c(Cl)c2)c1/C=C(\F)C(=O)NCCS(C)(=O)=O	7.14874	TRUE	<rdkit.Chem.rdchem.Mol object at 0x7facdf65c510>
CHEMBL598610	71.2	nM	COc1cc2c(Nc3ccc(F)c(Cl)c3)ncnc2cc1OCCCCCCC(=O)NO	7.14752	TRUE	<rdkit.Chem.rdchem.Mol object at 0x7facdf65c580>
CHEMBL515664	72	nM	COC[C@H]1CCCN1/N=C/c1c(N)ncnc1Nc1ccc2c(cnn2Cc2cccc(F)c2)c1	7.14267	TRUE	<rdkit.Chem.rdchem.Mol object at 0x7facdf65c5f0>
CHEMBL90595	73	nM	O=C(C#CCN1CCCCC1)Nc1ccc2ncnc(Nc3cccc(Br)c3)c2c1	7.13668	TRUE	<rdkit.Chem.rdchem.Mol object at 0x7facdf65c660>
CHEMBL443523	73	nM	C=CC(=O)Nc1ccc2c(Nc3cccc(Br)c3)ncnc2c1	7.13668	TRUE	<rdkit.Chem.rdchem.Mol object at 0x7facdf65c6d0>
CHEMBL398793	74	nM	CC1CNCCN(Cc2ccn3ncnc(Nc4ccc5c(cnn5Cc5cccc(F)c5)c4)c23)C1	7.13077	TRUE	<rdkit.Chem.rdchem.Mol object at 0x7facdf65c740>
CHEMBL1683970	74	nM	Cc1ncnc(Nc2ccc(OCc3cccc(F)c3)c(Cl)c2)c1C#CCCN1CCOCC1	7.13077	TRUE	<rdkit.Chem.rdchem.Mol object at 0x7facdf65c7b0>
CHEMBL3357634	75	nM	COc1cc2ncnc(Nc3ccc(F)c(Cl)c3)c2cc1NC(=O)/C(F)=C/CN(C)C	7.12494	TRUE	<rdkit.Chem.rdchem.Mol object at 0x7facdf65c820>
CHEMBL5208454	75.1	nM	O=C(CCCl)Nc1ccc2ncnc(Nc3ccc4[nH]cc(Br)c4c3)c2c1	7.12436	TRUE	<rdkit.Chem.rdchem.Mol object at 0x7facdf65c890>
CHEMBL402316	76	nM	CO/N=C/c1c(N)ncnc1Nc1ccc2[nH]c(Cc3cccc(F)c3)nc2c1	7.11919	TRUE	<rdkit.Chem.rdchem.Mol object at 0x7facdf65c900>
CHEMBL393787	76	nM	O[C@@H]1CNCCN(Cc2ccn3ncnc(Nc4ccc5c(cnn5Cc5cccc(F)c5)c4)c23)C1	7.11919	TRUE	<rdkit.Chem.rdchem.Mol object at 0x7facdf65c970>
CHEMBL392664	76	nM	Fc1cccc(Cn2ncc3cc(Nc4ncnn5ccc(CNC6CCNCC6)c45)ccc32)c1	7.11919	TRUE	<rdkit.Chem.rdchem.Mol object at 0x7facdf65c9e0>
CHEMBL598798	76.5	nM	C#Cc1cc(Nc2ncnc3cc(OC)c(OCCCCCCC(=O)NO)cc23)ccc1F	7.11634	TRUE	<rdkit.Chem.rdchem.Mol object at 0x7facdf65ca50>
CHEMBL3633774	77	nM	NC(=O)Nc1ccc2ncnc(Nc3ccc(Oc4cccc(C(F)(F)F)c4)c(Cl)c3)c2c1	7.11351	TRUE	<rdkit.Chem.rdchem.Mol object at 0x7facdf65cac0>
CHEMBL578255	77	nM	CCC1=C2C(Nc3ccc4c(cnn4Cc4ccccc4)c3)=NC=NC2N=C1NC(=O)OCCN1CCOCC1	7.11351	TRUE	<rdkit.Chem.rdchem.Mol object at 0x7facdf65cba0>
CHEMBL5173449	78	nM	COc1ccc(-c2c(CN3CCOCC3)nc3scc(C(=O)NN)n23)cc1	7.10791	TRUE	<rdkit.Chem.rdchem.Mol object at 0x7facdf65cc10>
CHEMBL1683965	78	nM	Cc1ncnc(Nc2ccc(OCc3cccc(F)c3)c(Cl)c2)c1/C=C(\F)C(=O)NCCN1CCOCC1	7.10791	TRUE	<rdkit.Chem.rdchem.Mol object at 0x7facdf65cc80>
CHEMBL430410	78	nM	Cc1ccc(Oc2ccc(Nc3ncnc4cccc(O[C@@H](C)C(=O)N(C)CCO)c34)cc2C)cn1	7.10791	TRUE	<rdkit.Chem.rdchem.Mol object at 0x7facdf65ccf0>
CHEMBL256060	79	nM	C[C@H](Oc1cccc2ncnc(Nc3ccc(OCc4ccccn4)c(Cl)c3)c12)C(=O)N(C)CCO	7.10237	TRUE	<rdkit.Chem.rdchem.Mol object at 0x7facdf65cd60>
CHEMBL402657	80	nM	C[C@H](Oc1cccc2ncnc(Nc3ccc4c(cnn4Cc4ccccn4)c3)c12)C(=O)N(C)C	7.09691	TRUE	<rdkit.Chem.rdchem.Mol object at 0x7facdf65cdd0>
CHEMBL472545	80	nM	Nc1ncnc(Nc2ccc(OCc3ccccc3)c(Cl)c2)c1-c1nnc(CCN2CCOCC2)o1	7.09691	TRUE	<rdkit.Chem.rdchem.Mol object at 0x7facdf65ce40>
CHEMBL1683963	81	nM	C/C(=C\c1c(C)ncnc1Nc1ccc(OCc2cccc(F)c2)c(Cl)c1)C(=O)NCCN1CCOCC1	7.09151	TRUE	<rdkit.Chem.rdchem.Mol object at 0x7facdf65ceb0>
CHEMBL231875	81	nM	Fc1cccc(Cn2ncc3cc(Nc4ncnn5ccc(CN6CCNCC6)c45)ccc32)c1	7.09151	TRUE	<rdkit.Chem.rdchem.Mol object at 0x7facdf65cf20>
CHEMBL497697	84	nM	CN/N=C/c1c(N)ncnc1Nc1ccc2c(cnn2Cc2cccc(F)c2)c1	7.07572	TRUE	<rdkit.Chem.rdchem.Mol object at 0x7facdf65cf90>
CHEMBL414220	85	nM	C=CCN(C)CC#CC(=O)Nc1ccc2ncnc(Nc3cccc(Br)c3)c2c1	7.07058	TRUE	<rdkit.Chem.rdchem.Mol object at 0x7facdf65d0b0>
CHEMBL248891	85	nM	COCc1cccc2[nH]c(-c3n[nH]c4ncc(-c5cncc6ccccc56)cc34)nc12	7.07058	TRUE	<rdkit.Chem.rdchem.Mol object at 0x7facdf65d120>
CHEMBL3680378	85.98	nM	COc1cc2ncnc(Nc3ccc(F)c(Cl)c3)c2cc1NC(=O)/C=C/CN1CCCCCC1	7.0656	TRUE	<rdkit.Chem.rdchem.Mol object at 0x7facdf65d190>
CHEMBL501705	87	nM	CCS(=O)(=O)N[C@H]1CN[C@H](C#Cc2cc3ncnc(Nc4ccc(OCc5cccc(F)c5)c(Cl)c4)c3s2)C1	7.06048	TRUE	<rdkit.Chem.rdchem.Mol object at 0x7facdf65d200>
CHEMBL455433	87	nM	O=C(O[C@H]1CN[C@H](C#Cc2cc3ncnc(NCc4cccc(Oc5ccccc5)c4)c3s2)C1)N1CCOCC1	7.06048	TRUE	<rdkit.Chem.rdchem.Mol object at 0x7facdf65d270>
CHEMBL427671	88	nM	Cc1ccn2ncnc(Nc3ccc4c(cnn4Cc4cccc(F)c4)c3)c12	7.05552	TRUE	<rdkit.Chem.rdchem.Mol object at 0x7facdf65d2e0>
CHEMBL5193128	88	nM	C=CC(=O)N1CCC([C@@H]2CCNC3C(C(N)=O)C(c4ccc(Oc5ccccc5)cc4)=NN32)CC1	7.05552	TRUE	<rdkit.Chem.rdchem.Mol object at 0x7facdf65d350>
CHEMBL249303	89	nM	CCN(CC)Cc1cccc2[nH]c(-c3n[nH]c4ncc(-c5cncc6ccccc56)cc34)nc12	7.05061	TRUE	<rdkit.Chem.rdchem.Mol object at 0x7facdf65d3c0>
CHEMBL3921555	89	nM	CN1CCN(C/C=C/C(=O)Nc2cc3c(Nc4ccc(F)c(Cl)c4)ncnc3cn2)CC1	7.05061	TRUE	<rdkit.Chem.rdchem.Mol object at 0x7facdf65d430>
CHEMBL2408051	89	nM	CNC(=O)CN1CCC(Oc2cc3c(Nc4ccc(F)c(Cl)c4F)ncnc3cc2OC)CC1	7.05061	TRUE	<rdkit.Chem.rdchem.Mol object at 0x7facdf65d4a0>
CHEMBL381115	90	nM	COc1ccc(I)c(Sc2nc3c(N)ncnc3n2CCNCC(C)(C)C)c1	7.04576	TRUE	<rdkit.Chem.rdchem.Mol object at 0x7facdf65d510>
CHEMBL402011	90	nM	C[C@@H](Oc1cccc2ncnc(Nc3ccc4c(cnn4Cc4ccccn4)c3)c12)C(=O)N(C)C	7.04576	TRUE	<rdkit.Chem.rdchem.Mol object at 0x7facdf65d580>
CHEMBL394333	90	nM	NCCOCc1ccn2ncnc(Nc3ccc4c(cnn4Cc4cccc(F)c4)c3)c12	7.04576	TRUE	<rdkit.Chem.rdchem.Mol object at 0x7facdf65d5f0>
CHEMBL204625	91	nM	Nc1ccccc1C#Cc1cncnc1Nc1ccc(OCc2cccc(F)c2)c(Cl)c1	7.04096	TRUE	<rdkit.Chem.rdchem.Mol object at 0x7facdf65d660>
CHEMBL3895468	91	nM	CN(C)C/C=C/C(=O)Nc1cc2c(Nc3ccc(F)c(Cl)c3)ncnc2cc1OCC12COCC1C2	7.04096	TRUE	<rdkit.Chem.rdchem.Mol object at 0x7facdf65d6d0>
CHEMBL221698	92	nM	O=C(NO)[C@H]1CC2(CC2)CN[C@@H]1C(=O)N1CC[C@H](c2ccccc2)C1	7.03621	TRUE	<rdkit.Chem.rdchem.Mol object at 0x7facdf65d740>
CHEMBL230575	94	nM	COCC(=O)NCC#Cc1ccc2ncnc(Nc3ccc(OC4CCN(C(=O)CC(C)(C)C)CC4)c(C)c3)c2c1	7.02687	TRUE	<rdkit.Chem.rdchem.Mol object at 0x7facdf65d7b0>
CHEMBL255438	95	nM	Nc1ncnc(Nc2ccc3c(cnn3Cc3cccc(F)c3)c2)c1/C=N/OCc1ccccc1	7.02228	TRUE	<rdkit.Chem.rdchem.Mol object at 0x7facdf65d820>
CHEMBL15346	95	nM	CS(=O)(=O)CCNCCCCOc1ccc2ncnc(Nc3ccc(OCc4ccccc4)cc3)c2c1	7.02228	TRUE	<rdkit.Chem.rdchem.Mol object at 0x7facdf65d890>
CHEMBL1683973	95	nM	Cc1ncnc(Nc2ccc(OCc3cccc(F)c3)c(Cl)c2)c1C#CCCCN1CCCC1	7.02228	TRUE	<rdkit.Chem.rdchem.Mol object at 0x7facdf65d900>
CHEMBL230995	96	nM	COc1ccc2ncnc(Nc3ccc(OC4CCN(C(=O)CC(C)(C)C)CC4)c(C)c3)c2c1	7.01773	TRUE	<rdkit.Chem.rdchem.Mol object at 0x7facdf65d970>
CHEMBL3357642	97.1	nM	CN(C)C/C=C(/F)C(=O)Nc1cc2c(Nc3ccc(F)c(Cl)c3)ncnc2cc1O[C@H]1CCOC1	7.01278	TRUE	<rdkit.Chem.rdchem.Mol object at 0x7facdf65d9e0>
CHEMBL523076	99	nM	O=C(NO)[C@H]1CC(CC(=O)N2CCCC2)CC[C@@H]1C(=O)N1CCN(c2ccccc2)CC1	7.00436	TRUE	<rdkit.Chem.rdchem.Mol object at 0x7facdf65da50>
CHEMBL3932057	100	nM	C[C@@H](Nc1ncnc2[nH]c(-c3ccc(NCc4ccc(C(=O)NO)cc4)cc3)cc12)c1ccccc1	7	TRUE	<rdkit.Chem.rdchem.Mol object at 0x7facdf65dac0>
CHEMBL3917105	100	nM	O=C(CCCCCN1CCN(Cc2ccc(-c3cc4c(NCc5ccccc5)ncnc4[nH]3)cc2)CC1)NO	7	TRUE	<rdkit.Chem.rdchem.Mol object at 0x7facdf65db30>
CHEMBL201871	100	nM	COc1ccc(I)c(Sc2nc3c(N)ncnc3n2CCNCC(C)C)c1	7	TRUE	<rdkit.Chem.rdchem.Mol object at 0x7facdf65dba0>
CHEMBL3933895	100	nM	CCOc1cc2ncnc(Nc3ccc4c(ccn4S(=O)(=O)c4ccccc4)c3)c2cc1NC(=O)/C=C/CN1CCOCC1	7	TRUE	<rdkit.Chem.rdchem.Mol object at 0x7facdf65dc10>
CHEMBL3914322	100	nM	C[C@@H](Nc1ncnc2[nH]c(-c3ccc(OCCCCCCC(=O)NO)cc3)cc12)c1ccc(F)cc1	7	TRUE	<rdkit.Chem.rdchem.Mol object at 0x7facdf65dc80>
CHEMBL2348419	100	nM	COC(=O)C1=Cc2c(ncnc2Nc2ccc(Oc3cccc(C(F)(F)F)c3)c(Cl)c2)NCC1	7	TRUE	<rdkit.Chem.rdchem.Mol object at 0x7facdf65dcf0>
CHEMBL3951620	100	nM	C[C@@H](Nc1ncnc2[nH]c(-c3ccc(OCCCCCCC(=O)NO)cc3)cc12)c1ccccc1	7	TRUE	<rdkit.Chem.rdchem.Mol object at 0x7facdf65dd60>
CHEMBL3977504	100	nM	CN(C)C/C=C/C(=O)Nc1cc2c(Nc3ccc(Oc4ccccc4)cc3)ncnc2cn1	7	TRUE	<rdkit.Chem.rdchem.Mol object at 0x7facdf65ddd0>
CHEMBL3968968	100	nM	C[C@@H](Nc1ncnc2[nH]c(-c3ccc(CNCc4ccc(C(=O)NO)cc4)cc3)cc12)c1ccccc1	7	TRUE	<rdkit.Chem.rdchem.Mol object at 0x7facdf65de40>
CHEMBL3901236	100	nM	C[C@@H](Nc1ncnc2[nH]c(-c3ccc(CNCCCCCCC(=O)NO)cc3)cc12)c1ccccc1	7	TRUE	<rdkit.Chem.rdchem.Mol object at 0x7facdf65deb0>
CHEMBL3981584	100	nM	O=C(NO)c1ccc(-c2cc3c(NCc4ccccc4)ncnc3[nH]2)cc1	7	TRUE	<rdkit.Chem.rdchem.Mol object at 0x7facdf65df20>
CHEMBL3936547	100	nM	C[C@@H](Nc1ncnc2[nH]c(-c3ccc(CNCCCCCC(=O)NO)cc3)cc12)c1ccccc1	7	TRUE	<rdkit.Chem.rdchem.Mol object at 0x7facdf65df90>
CHEMBL3984055	100	nM	C[C@@H](Nc1ncnc2[nH]c(-c3ccc(C(=O)NO)cc3)cc12)c1ccc(F)cc1	7	TRUE	<rdkit.Chem.rdchem.Mol object at 0x7facdf65e040>
CHEMBL3950023	100	nM	C[C@@H](Nc1ncnc2[nH]c(-c3ccc(NC(=O)CCNCC(=O)NO)cc3)cc12)c1ccccc1	7	TRUE	<rdkit.Chem.rdchem.Mol object at 0x7facdf65e0b0>
CHEMBL3984573	100	nM	C[C@@H](Nc1ncnc2[nH]c(-c3ccc(C(=O)NCCNCCC(=O)NO)cc3)cc12)c1ccccc1	7	TRUE	<rdkit.Chem.rdchem.Mol object at 0x7facdf65e120>
CHEMBL3917093	100	nM	C[C@@H](Nc1ncnc2c1cc(-c1ccc(C(=O)NCCNCCCCCCC(=O)NO)cc1)n2C)c1ccccc1	7	TRUE	<rdkit.Chem.rdchem.Mol object at 0x7facdf65e190>
CHEMBL521719	100	nM	O=C(NO)[C@H]1CC2(CC[C@@H]1C(=O)N1CCN(c3ccccc3)CC1)CC2	7	TRUE	<rdkit.Chem.rdchem.Mol object at 0x7facdf65e200>
CHEMBL3898444	100	nM	C#Cc1cccc(Nc2ncnc3cc(OCCCCCCC(=O)NO)c(OCCOC)cc23)c1	7	TRUE	<rdkit.Chem.rdchem.Mol object at 0x7facdf65e270>
CHEMBL3907491	100	nM	C[C@@H](Nc1ncnc2[nH]c(-c3ccc(CNCCC(=O)NO)cc3)cc12)c1ccccc1	7	TRUE	<rdkit.Chem.rdchem.Mol object at 0x7facdf65e2e0>
CHEMBL3921652	100	nM	C[C@@H](Nc1ncnc2[nH]c(-c3ccc(NC(=O)CCCC(=O)NO)cc3)cc12)c1ccccc1	7	TRUE	<rdkit.Chem.rdchem.Mol object at 0x7facdf65e350>
CHEMBL3938265	100	nM	C[C@@H](Nc1ncnc2[nH]c(-c3ccc(CN4CCN(CCCCCC(=O)NO)CC4)cc3)cc12)c1ccccc1	7	TRUE	<rdkit.Chem.rdchem.Mol object at 0x7facdf65e3c0>
CHEMBL3977186	100	nM	C[C@@H](Nc1ncnc2[nH]c(-c3ccc(OCCCC(=O)NO)cc3)cc12)c1ccccc1	7	TRUE	<rdkit.Chem.rdchem.Mol object at 0x7facdf65e430>
CHEMBL3961102	100	nM	C[C@@H](Nc1ncnc2[nH]c(-c3ccc(NC(=O)CCC(=O)NO)cc3)cc12)c1ccccc1	7	TRUE	<rdkit.Chem.rdchem.Mol object at 0x7facdf65e4a0>
CHEMBL497222	100	nM	CN1CCN(C(=O)CC2CC[C@H](C(=O)N3CCN(c4ccccc4)CC3)[C@@H](C(=O)NO)C2)CC1	7	TRUE	<rdkit.Chem.rdchem.Mol object at 0x7facdf65e510>
CHEMBL3924346	100	nM	C[C@@H](Nc1ncnc2[nH]c(-c3ccc(NC(=O)CCCCC(=O)NO)cc3)cc12)c1ccccc1	7	TRUE	<rdkit.Chem.rdchem.Mol object at 0x7facdf65e580>
CHEMBL3899385	100	nM	C[C@@H](Nc1ncnc2[nH]c(-c3ccc(OCCCCC(=O)NO)cc3)cc12)c1ccccc1	7	TRUE	<rdkit.Chem.rdchem.Mol object at 0x7facdf65e5f0>
CHEMBL3902161	100	nM	C[C@@H](Nc1ncnc2[nH]c(-c3ccc(OCCCCCC(=O)NO)cc3)cc12)c1ccccc1	7	TRUE	<rdkit.Chem.rdchem.Mol object at 0x7facdf65e660>
CHEMBL3901144	100	nM	C#Cc1cccc(Nc2ncnc3cc(OC)c(NC(=O)CCCCCCC(=O)NO)cc23)c1	7	TRUE	<rdkit.Chem.rdchem.Mol object at 0x7facdf65e6d0>
CHEMBL3909900	100	nM	C#Cc1cc(Nc2ncnc3cc(OCCOC)c(OCCCCCCCC(=O)NO)cc23)ccc1F	7	TRUE	<rdkit.Chem.rdchem.Mol object at 0x7facdf65e740>
CHEMBL3959043	100	nM	C#Cc1cc(Nc2ncnc3cc(OC)c(OCCCCCCCC(=O)NO)cc23)ccc1F	7	TRUE	<rdkit.Chem.rdchem.Mol object at 0x7facdf65e7b0>
CHEMBL516487	100	nM	COC(=O)c1c(N)ncnc1Nc1ccc(OCc2ccccc2)c(Cl)c1	7	TRUE	<rdkit.Chem.rdchem.Mol object at 0x7facdf65e820>
CHEMBL3972249	100	nM	C[C@@H](Nc1ncnc2[nH]c(-c3ccc(CN4CCN(CCCCC(=O)NO)CC4)cc3)cc12)c1ccccc1	7	TRUE	<rdkit.Chem.rdchem.Mol object at 0x7facdf65e890>
CHEMBL230994	100	nM	COc1cc2ncnc(Nc3ccc(OC4CCN(C(=O)CC(C)(C)C)CC4)c(C)c3)c2cc1OC	7	TRUE	<rdkit.Chem.rdchem.Mol object at 0x7facdf65e900>
CHEMBL3896779	102	nM	O=C(/C=C/CN1CCCC1)Nc1cc2c(Nc3ccc(Oc4ccccc4)cc3)ncnc2cn1	6.9914	TRUE	<rdkit.Chem.rdchem.Mol object at 0x7facdf65e970>
CHEMBL496211	102	nM	CN1CC(CC(=O)N2CCCCC2)C[C@H](C(=O)NO)[C@H]1C(=O)N1CCN(c2ccccc2)CC1	6.9914	TRUE	<rdkit.Chem.rdchem.Mol object at 0x7facdf65e9e0>
CHEMBL4582195	104	nM	O=C(CSC(=S)N1CCCCC1)Nc1cccc(NC(=O)c2ccccn2)c1	6.98297	TRUE	<rdkit.Chem.rdchem.Mol object at 0x7facdf65ea50>
CHEMBL438536	107	nM	Cc1cc(Nc2ncnc3[nH]nc(OCCN4CCC(O)CC4)c23)ccc1OCc1cccc(F)c1	6.97062	TRUE	<rdkit.Chem.rdchem.Mol object at 0x7facdf65eac0>
CHEMBL218677	107	nM	COc1cc2ncnc(Nc3cccc(Cl)c3F)c2cc1OC1CCN(CC(N)=O)CC1	6.97062	TRUE	<rdkit.Chem.rdchem.Mol object at 0x7facdf65eb30>
CHEMBL5204417	108	nM	CC(=O)NNC(=O)c1csc2ncc(-c3ccc(Br)cc3)n12	6.96658	TRUE	<rdkit.Chem.rdchem.Mol object at 0x7facdf65eba0>
CHEMBL234772	110	nM	O=C(O)C1CCN(Cc2ccn3ncnc(Nc4ccc5c(cnn5Cc5cccc(F)c5)c4)c23)CC1	6.95861	TRUE	<rdkit.Chem.rdchem.Mol object at 0x7facdf65ec10>
CHEMBL194958	110	nM	CCc1c(C(N)=O)cn2ncnc(Nc3ccc4c(cnn4Cc4ccccc4)c3)c12	6.95861	TRUE	<rdkit.Chem.rdchem.Mol object at 0x7facdf65ec80>
CHEMBL247309	110	nM	CN(C)C1CCN(Cc2ccn3ncnc(Nc4ccc5c(cnn5Cc5cccc(F)c5)c4)c23)CC1	6.95861	TRUE	<rdkit.Chem.rdchem.Mol object at 0x7facdf65ecf0>
CHEMBL140561	110	nM	CN(C)CCCOC(=O)/C=C/C(=O)Nc1ccc2ncnc(Nc3cccc(Br)c3)c2c1	6.95861	TRUE	<rdkit.Chem.rdchem.Mol object at 0x7facdf65ed60>
CHEMBL391521	110	nM	CN(CCO)Cc1ccn2ncnc(Nc3ccc4c(cnn4Cc4cccc(F)c4)c3)c12	6.95861	TRUE	<rdkit.Chem.rdchem.Mol object at 0x7facdf65edd0>
CHEMBL246276	110	nM	OCc1ccn2ncnc(Nc3ccc4c(cnn4Cc4cccc(F)c4)c3)c12	6.95861	TRUE	<rdkit.Chem.rdchem.Mol object at 0x7facdf65ee40>
CHEMBL246694	110	nM	NC(=O)COCc1ccn2ncnc(Nc3ccc4c(cnn4Cc4cccc(F)c4)c3)c12	6.95861	TRUE	<rdkit.Chem.rdchem.Mol object at 0x7facdf65eeb0>
CHEMBL429827	110	nM	Cc1ccn2ncnc(Nc3ccc4c(cnn4Cc4ccccc4)c3)c12	6.95861	TRUE	<rdkit.Chem.rdchem.Mol object at 0x7facdf65ef20>
CHEMBL3092308	112	nM	O=C(NCCN1CCCC1)Nc1cc2c(Nc3ccc(F)c(Cl)c3)ncnc2cc1O[C@H]1CCOC1	6.95078	TRUE	<rdkit.Chem.rdchem.Mol object at 0x7facdf65ef90>
CHEMBL91811	113	nM	CC(C)N(C)CC#CC(=O)Nc1ccc2ncnc(Nc3cccc(Br)c3)c2c1	6.94692	TRUE	<rdkit.Chem.rdchem.Mol object at 0x7facdf65f040>
CHEMBL473427	113	nM	Fc1cccc(COc2ccc(Nc3ncnc4cc(-c5cccs5)sc34)cc2Cl)c1	6.94692	TRUE	<rdkit.Chem.rdchem.Mol object at 0x7facdf65f0b0>
CHEMBL388978	115	nM	CN[C@@H]1C[C@H]2O[C@@](C)([C@@H]1OC)n1c3ccccc3c3c4c(c5c6ccccc6n2c5c31)C(=O)NC4	6.9393	TRUE	<rdkit.Chem.rdchem.Mol object at 0x7facdf65f120>
CHEMBL327838	116	nM	COCCOCC#CC(=O)Nc1ccc2ncnc(Nc3cccc(Br)c3)c2c1	6.93554	TRUE	<rdkit.Chem.rdchem.Mol object at 0x7facdf65f190>
CHEMBL93784	117	nM	COCC1CCCN1CC#CC(=O)Nc1ccc2ncnc(Nc3cccc(Br)c3)c2c1	6.93181	TRUE	<rdkit.Chem.rdchem.Mol object at 0x7facdf65f200>
CHEMBL525725	118	nM	COc1ccc(/N=C/c2c(N)ncnc2Nc2ccc3c(cnn3Cc3cccc(F)c3)c2)cc1	6.92812	TRUE	<rdkit.Chem.rdchem.Mol object at 0x7facdf65f270>
CHEMBL2408046	120	nM	CCNC(=O)CN1CCC(Oc2cc3c(Nc4cccc(Cl)c4F)ncnc3cc2OC)CC1	6.92082	TRUE	<rdkit.Chem.rdchem.Mol object at 0x7facdf65f2e0>
CHEMBL232082	120	nM	CN1CCN(Cc2ccn3ncnc(Nc4ccc5c(cnn5Cc5cccc(F)c5)c4)c23)CC1	6.92082	TRUE	<rdkit.Chem.rdchem.Mol object at 0x7facdf65f350>
CHEMBL246072	120	nM	Fc1cccc(Cn2ncc3cc(Nc4ncnn5ccc(COCC6CCNCC6)c45)ccc32)c1	6.92082	TRUE	<rdkit.Chem.rdchem.Mol object at 0x7facdf65f3c0>
CHEMBL234577	120	nM	CN1CCCN(Cc2ccn3ncnc(Nc4ccc5c(cnn5Cc5cccc(F)c5)c4)c23)CC1	6.92082	TRUE	<rdkit.Chem.rdchem.Mol object at 0x7facdf65f430>
CHEMBL400413	120	nM	CS(=O)(=O)N1CCCN(Cc2ccn3ncnc(Nc4ccc5c(cnn5Cc5cccc(F)c5)c4)c23)CC1	6.92082	TRUE	<rdkit.Chem.rdchem.Mol object at 0x7facdf65f4a0>
CHEMBL1922904	120	nM	FC(F)(F)c1ccccc1Oc1ccc(Nc2ncnc3cc[nH]c23)cc1Cl	6.92082	TRUE	<rdkit.Chem.rdchem.Mol object at 0x7facdf65f510>
CHEMBL258353	120	nM	CN(CCO)C(=O)COc1cccc2ncnc(Nc3ccc(OCc4ccccn4)c(Cl)c3)c12	6.92082	TRUE	<rdkit.Chem.rdchem.Mol object at 0x7facdf65f580>
CHEMBL247513	120	nM	O=C(CO)NC1CCN(Cc2ccn3ncnc(Nc4ccc5c(cnn5Cc5cccc(F)c5)c4)c23)CC1	6.92082	TRUE	<rdkit.Chem.rdchem.Mol object at 0x7facdf65f5f0>
CHEMBL473436	121	nM	Fc1cccc(COc2ccc(Nc3ncnc4cc(-c5ccc[nH]5)sc34)cc2Cl)c1	6.91721	TRUE	<rdkit.Chem.rdchem.Mol object at 0x7facdf65f660>
CHEMBL5204650	121	nM	NNC(=O)c1csc2nc(CN3CCOCC3)c(-c3ccc(Br)cc3)n12	6.91721	TRUE	<rdkit.Chem.rdchem.Mol object at 0x7facdf65f6d0>
CHEMBL473428	122	nM	OCc1ccc(-c2cc3ncnc(Nc4ccc(OCc5cccc(F)c5)c(Cl)c4)c3s2)o1	6.91364	TRUE	<rdkit.Chem.rdchem.Mol object at 0x7facdf65f740>
CHEMBL93049	122	nM	COCOCC#CC(=O)Nc1ccc2ncnc(Nc3cccc(Br)c3)c2c1	6.91364	TRUE	<rdkit.Chem.rdchem.Mol object at 0x7facdf65f7b0>
CHEMBL328977	124	nM	O=C(C#CCN1CCSCC1)Nc1ccc2ncnc(Nc3cccc(Br)c3)c2c1	6.90658	TRUE	<rdkit.Chem.rdchem.Mol object at 0x7facdf65f820>
CHEMBL3977326	124	nM	CCC(=O)Nc1cc2c(Nc3ccc4c(ccn4Cc4ccccc4)c3)ncnc2cc1OC	6.90658	TRUE	<rdkit.Chem.rdchem.Mol object at 0x7facdf65f890>
CHEMBL31816	125	nM	C=CC(=O)Nc1nc2c(Nc3ccc(F)c(Cl)c3)ncnc2cc1OC	6.90309	TRUE	<rdkit.Chem.rdchem.Mol object at 0x7facdf65f900>
CHEMBL3633932	126	nM	CCNC(=O)Nc1ccc2ncnc(Nc3ccc(OCc4cccc(F)c4)c(Cl)c3)c2c1	6.89963	TRUE	<rdkit.Chem.rdchem.Mol object at 0x7facdf65f970>
CHEMBL258270	129	nM	CC(=O)N1CCN(CCOc2n[nH]c3ncnc(Nc4ccc(OCc5ccccn5)c(Cl)c4)c23)CC1	6.88941	TRUE	<rdkit.Chem.rdchem.Mol object at 0x7facdf65f9e0>
CHEMBL394495	130	nM	C[C@H](c1ccccc1)n1ncc2cc(Nc3ncnn4ccc(COC[C@@H]5CNCCO5)c34)ccc21	6.88606	TRUE	<rdkit.Chem.rdchem.Mol object at 0x7facdf65fa50>
CHEMBL256996	130	nM	C[C@H](Oc1cccc2ncnc(Nc3ccc4c(cnn4Cc4cscn4)c3)c12)C(=O)N(C)C	6.88606	TRUE	<rdkit.Chem.rdchem.Mol object at 0x7facdf65fac0>
CHEMBL245867	130	nM	NCCCCOCc1ccn2ncnc(Nc3ccc4c(cnn4Cc4cccc(F)c4)c3)c12	6.88606	TRUE	<rdkit.Chem.rdchem.Mol object at 0x7facdf65fb30>
CHEMBL255337	130	nM	Cc1ccc(Oc2ccc(Nc3ncnc4cccc(OCC(=O)N(C)CCO)c34)cc2C)cn1	6.88606	TRUE	<rdkit.Chem.rdchem.Mol object at 0x7facdf65fba0>
CHEMBL2048792	130	nM	O=C1Cc2ccc(Oc3ccc(Nc4ncnc5ccn(CCO)c45)cc3Cl)cc2N1	6.88606	TRUE	<rdkit.Chem.rdchem.Mol object at 0x7facdf65fc10>
CHEMBL197689	130	nM	CCc1c(C(=O)NC)cn2ncnc(Nc3ccc4c(cnn4Cc4ccccc4)c3)c12	6.88606	TRUE	<rdkit.Chem.rdchem.Mol object at 0x7facdf65fc80>
CHEMBL1336	131	nM	CNC(=O)c1cc(Oc2ccc(NC(=O)Nc3ccc(Cl)c(C(F)(F)F)c3)cc2)ccn1	6.88273	TRUE	<rdkit.Chem.rdchem.Mol object at 0x7facdf65fcf0>
CHEMBL1928946	135	nM	CC(=O)Nc1cccc(Oc2cc(Nc3ccc(OCc4cccc(F)c4)c(Cl)c3)ncn2)c1	6.86967	TRUE	<rdkit.Chem.rdchem.Mol object at 0x7facdf65fd60>
CHEMBL445717	137	nM	O=C(CC1CN[C@H](C(=O)N2CCC(c3ccccc3)C2)[C@@H](C(=O)NO)C1)NCCCCCNC(=O)OCc1ccccc1	6.86328	TRUE	<rdkit.Chem.rdchem.Mol object at 0x7facdf65fdd0>
CHEMBL395591	140	nM	Fc1cccc(Cn2ncc3cc(Nc4ncnn5ccc(COCC6CNCCOC6)c45)ccc32)c1	6.85387	TRUE	<rdkit.Chem.rdchem.Mol object at 0x7facdf65fe40>
CHEMBL1683955	140	nM	Cc1ncnc(Nc2ccc(OCc3cccc(F)c3)c(Cl)c2)c1C	6.85387	TRUE	<rdkit.Chem.rdchem.Mol object at 0x7facdf65feb0>
CHEMBL199532	140	nM	COc1ccc(I)c(Sc2nc3c(N)ncnc3n2CCCNC(C)(C)C)c1	6.85387	TRUE	<rdkit.Chem.rdchem.Mol object at 0x7facdf65ff20>
CHEMBL438440	140	nM	Fc1cccc(COc2ccc(Nc3ncncc3C#Cc3cccnc3)cc2Cl)c1	6.85387	TRUE	<rdkit.Chem.rdchem.Mol object at 0x7facdf65ff90>
CHEMBL257196	140	nM	C[C@@H](Oc1cccc2ncnc(Nc3ccc4c(cnn4Cc4cscn4)c3)c12)C(N)=O	6.85387	TRUE	<rdkit.Chem.rdchem.Mol object at 0x7facdf660040>
CHEMBL391437	140	nM	c1ccc2c(-c3cnc4[nH]nc(-c5nc6ccccc6[nH]5)c4c3)cncc2c1	6.85387	TRUE	<rdkit.Chem.rdchem.Mol object at 0x7facdf6600b0>
CHEMBL413997	140	nM	C[C@H](Oc1cccc2ncnc(Nc3ccc4c(cnn4Cc4ccccn4)c3)c12)C(=O)N1CCOCC1	6.85387	TRUE	<rdkit.Chem.rdchem.Mol object at 0x7facdf660120>
CHEMBL258354	140	nM	O=C(COc1cccc2ncnc(Nc3ccc(OCc4ccccn4)c(Cl)c3)c12)N1CCOCC1	6.85387	TRUE	<rdkit.Chem.rdchem.Mol object at 0x7facdf660190>
CHEMBL5194543	146	nM	Cc1ccc(-c2c(CN3CCCCC3)nc3scc(C(=O)O)n23)cc1	6.83565	TRUE	<rdkit.Chem.rdchem.Mol object at 0x7facdf660200>
CHEMBL511478	146	nM	NNC(=O)c1c(N)ncnc1Nc1ccc(OCc2ccccc2)c(Cl)c1	6.83565	TRUE	<rdkit.Chem.rdchem.Mol object at 0x7facdf660270>
CHEMBL460732	147	nM	CS(=O)(=O)CCNCCCCOc1ccc2ncnc(Nc3ccc(S(=O)(=O)c4ccccc4)cc3)c2c1	6.83268	TRUE	<rdkit.Chem.rdchem.Mol object at 0x7facdf660350>
CHEMBL270448	148	nM	Clc1cc(Nc2ncnc3[nH]nc(OCCN4CCCCCO4)c23)ccc1OCc1ccccn1	6.82974	TRUE	<rdkit.Chem.rdchem.Mol object at 0x7facdf6603c0>
CHEMBL4577883	148.3	nM	COC[C@@H](C)Oc1cc2ncnc(Nc3ccc(F)c(Cl)c3)c2cc1NC(=O)/C=C/CN(C)C	6.82886	TRUE	<rdkit.Chem.rdchem.Mol object at 0x7facdf660430>
CHEMBL3357641	149.4	nM	CN(C)C/C=C(\F)C(=O)Nc1cc2c(Nc3ccc(F)c(Cl)c3)ncnc2cc1O[C@H]1CCOC1	6.82565	TRUE	<rdkit.Chem.rdchem.Mol object at 0x7facdf6604a0>
CHEMBL1683961	150	nM	Cc1ncnc(Nc2ccc(OCc3cccc(F)c3)c(Cl)c2)c1C#CCCCN1CCOCC1	6.82391	TRUE	<rdkit.Chem.rdchem.Mol object at 0x7facdf660510>
CHEMBL2048793	150	nM	O=C1NCc2c(Oc3ccc(Nc4ncnc5ccn(CCO)c45)cc3Cl)cccc21	6.82391	TRUE	<rdkit.Chem.rdchem.Mol object at 0x7facdf6605f0>
CHEMBL230574	150	nM	COCC(=O)NCC#Cc1ccc2ncnc(Nc3ccc(OC4CCN(C(=O)C5CCC5)CC4)c(C)c3)c2c1	6.82391	TRUE	<rdkit.Chem.rdchem.Mol object at 0x7facdf660660>
CHEMBL257815	153	nM	CO/N=C/c1c(N)ncnc1Nc1ccc(OCc2ccccc2)c(Cl)c1	6.81531	TRUE	<rdkit.Chem.rdchem.Mol object at 0x7facdf6606d0>
CHEMBL3948084	153	nM	CCC(=O)Nc1cc2c(Nc3ccc4c(cnn4Cc4ccccc4)c3)ncnc2cc1OC	6.81531	TRUE	<rdkit.Chem.rdchem.Mol object at 0x7facdf660740>
CHEMBL205047	160	nM	OCc1nc(C#Cc2cncnc2Nc2ccc(OCc3cccc(F)c3)c(Cl)c2)cs1	6.79588	TRUE	<rdkit.Chem.rdchem.Mol object at 0x7facdf6607b0>
CHEMBL404327	160	nM	C[C@@H](Oc1cccc2ncnc(Nc3ccc4c(cnn4Cc4cscn4)c3)c12)C(=O)N1CCOCC1	6.79588	TRUE	<rdkit.Chem.rdchem.Mol object at 0x7facdf660820>
CHEMBL568356	162	nM	NCCCCNC(=O)CC1CN[C@H](C(=O)N2CCC(c3ccccc3)C2)[C@@H](C(=O)NO)C1	6.79048	TRUE	<rdkit.Chem.rdchem.Mol object at 0x7facdf660890>
CHEMBL92961	162	nM	CC(C)N(CC#CC(=O)Nc1ccc2ncnc(Nc3cccc(Br)c3)c2c1)C(C)C	6.79048	TRUE	<rdkit.Chem.rdchem.Mol object at 0x7facdf660900>
CHEMBL495797	162	nM	NCCCCCNC(=O)CC1CN[C@H](C(=O)N2CCC(c3ccccc3)C2)[C@@H](C(=O)NO)C1	6.79048	TRUE	<rdkit.Chem.rdchem.Mol object at 0x7facdf660970>
CHEMBL3920583	165.5	nM	O=C(CCCCCn1cc(-c2ccc3ncnc(Nc4ccc(F)c(Cl)c4)c3c2)nn1)NO	6.7812	TRUE	<rdkit.Chem.rdchem.Mol object at 0x7facdf6609e0>
CHEMBL392774	170	nM	COC1CNCCN(Cc2ccn3ncnc(Nc4ccc5c(cnn5Cc5cccc(F)c5)c4)c23)C1	6.76955	TRUE	<rdkit.Chem.rdchem.Mol object at 0x7facdf660a50>
CHEMBL246073	170	nM	Fc1cccc(Cn2ncc3cc(Nc4ncnn5ccc(COC[C@H]6CCCNC6)c45)ccc32)c1	6.76955	TRUE	<rdkit.Chem.rdchem.Mol object at 0x7facdf660ac0>
CHEMBL5199520	170	nM	NS(=O)(=O)c1ccc(CCn2c(SCC(=O)Nc3ccc(Cl)cc3)nc3ccccc3c2=O)cc1	6.76955	TRUE	<rdkit.Chem.rdchem.Mol object at 0x7facdf660b30>
CHEMBL496629	170	nM	O=C(NO)[C@H]1C[C@H](CC(=O)N2CCCCC2)CC[C@@H]1C(=O)N1CCN(c2ccccc2)CC1	6.76955	TRUE	<rdkit.Chem.rdchem.Mol object at 0x7facdf660ba0>
CHEMBL247711	170	nM	COc1cn2ncnc(Nc3ccc4c(cnn4Cc4cccc(F)c4)c3)c2c1CN1CCCNCC1	6.76955	TRUE	<rdkit.Chem.rdchem.Mol object at 0x7facdf660c10>
CHEMBL430031	173	nM	CC(C)CO/N=C/c1c(N)ncnc1Nc1ccc2c(cnn2Cc2cccc(F)c2)c1	6.76195	TRUE	<rdkit.Chem.rdchem.Mol object at 0x7facdf660c80>
CHEMBL3957416	174	nM	CCOc1cc2ncnc(Nc3ccc(NS(=O)(=O)c4ccccc4)cc3)c2cc1NC(=O)/C=C/CN1CCOCC1	6.75945	TRUE	<rdkit.Chem.rdchem.Mol object at 0x7facdf660cf0>
CHEMBL3930620	174.9	nM	O=C(CCCCCCn1cc(-c2ccc3ncnc(Nc4cccc(Cl)c4F)c3c2)nn1)NO	6.75721	TRUE	<rdkit.Chem.rdchem.Mol object at 0x7facdf660d60>
CHEMBL598406	175	nM	COc1cc2ncnc(N[C@@H](C)c3ccc(F)cc3)c2cc1OCCCCCCC(=O)NO	6.75696	TRUE	<rdkit.Chem.rdchem.Mol object at 0x7facdf660dd0>
CHEMBL3957055	176.7	nM	O=C(CCCCCCn1cc(-c2ccc3ncnc(Nc4ccc(F)c(Cl)c4)c3c2)nn1)NO	6.75276	TRUE	<rdkit.Chem.rdchem.Mol object at 0x7facdf660e40>
CHEMBL328245	177	nM	CCCN(CC#CC(=O)Nc1ccc2ncnc(Nc3cccc(Br)c3)c2c1)CCC	6.75203	TRUE	<rdkit.Chem.rdchem.Mol object at 0x7facdf660eb0>
CHEMBL116853	180	nM	COc1cc2ncc(C#N)c(Nc3cccc(Br)c3)c2cc1NC(=O)C#CCN(C)C	6.74473	TRUE	<rdkit.Chem.rdchem.Mol object at 0x7facdf660f20>
CHEMBL381521	180	nM	COc1ccc(I)c(Sc2nc3c(N)ncnc3n2CCCNC(C)C)c1	6.74473	TRUE	<rdkit.Chem.rdchem.Mol object at 0x7facdf660f90>
CHEMBL196925	180	nM	CCOC(=O)c1cn2ncnc(Nc3ccc4c(cnn4Cc4ccccc4)c3)c2c1CC	6.74473	TRUE	<rdkit.Chem.rdchem.Mol object at 0x7facdf662040>
CHEMBL247512	180	nM	CC(=O)NC1CCN(Cc2ccn3ncnc(Nc4ccc5c(cnn5Cc5cccc(F)c5)c4)c23)CC1	6.74473	TRUE	<rdkit.Chem.rdchem.Mol object at 0x7facdf6620b0>
CHEMBL272929	180	nM	NC(=O)COc1cccc2ncnc(Nc3ccc(OCc4ccccn4)c(Cl)c3)c12	6.74473	TRUE	<rdkit.Chem.rdchem.Mol object at 0x7facdf662120>
CHEMBL284326	182	nM	C=CC(=O)Nc1nc2c(Nc3ccc(F)c(Cl)c3)ncnc2cc1OCCCN1CCN(C)CC1	6.73993	TRUE	<rdkit.Chem.rdchem.Mol object at 0x7facdf662190>
CHEMBL92356	183	nM	CCN1CCN(CC#CC(=O)Nc2ccc3ncnc(Nc4cccc(Br)c4)c3c2)CC1	6.73755	TRUE	<rdkit.Chem.rdchem.Mol object at 0x7facdf662200>
CHEMBL255170	184	nM	Cc1ccc(Oc2ccc(Nc3ncnc4[nH]nc(OCCN5CCC(O)CC5)c34)cc2Cl)cn1	6.73518	TRUE	<rdkit.Chem.rdchem.Mol object at 0x7facdf662270>
CHEMBL249496	186	nM	Nc1ncnc2c1c(-c1ccc3nc(Cc4ccccc4)[nH]c3c1)nn2[C@H]1CC[C@H](N2CCOCC2)CC1	6.73049	TRUE	<rdkit.Chem.rdchem.Mol object at 0x7facdf6622e0>
CHEMBL31656	189	nM	C=CC(=O)Nc1nc2c(Nc3ccc(F)c(Cl)c3)ncnc2cc1OCCCN1CCOCC1	6.72354	TRUE	<rdkit.Chem.rdchem.Mol object at 0x7facdf662350>
CHEMBL256527	189	nM	CO/N=C/c1c(N)ncnc1Nc1ccc2c(cnn2Cc2ccc(F)cc2)c1	6.72354	TRUE	<rdkit.Chem.rdchem.Mol object at 0x7facdf6623c0>
CHEMBL4079768	190	nM	C#Cc1cccc(Nc2ncnc3ccc(OCCCOP(N)(=O)N(CCCl)CCCl)cc23)c1	6.72125	TRUE	<rdkit.Chem.rdchem.Mol object at 0x7facdf662430>
CHEMBL246898	190	nM	CS(=O)(=O)CCNC1CCN(Cc2ccn3ncnc(Nc4ccc5c(cnn5Cc5cccc(F)c5)c4)c23)CC1	6.72125	TRUE	<rdkit.Chem.rdchem.Mol object at 0x7facdf6624a0>
CHEMBL247916	190	nM	NC1CCN(Cc2ccn3ncnc(Nc4ccc5c(cnn5Cc5ccncc5)c4)c23)CC1	6.72125	TRUE	<rdkit.Chem.rdchem.Mol object at 0x7facdf662510>
CHEMBL496018	194	nM	CN1CC(CC(=O)N2CCCC2)C[C@H](C(=O)NO)[C@H]1C(=O)N1CCN(c2ccccc2)CC1	6.7122	TRUE	<rdkit.Chem.rdchem.Mol object at 0x7facdf662580>
CHEMBL157084	200	nM	CS(=O)(=O)CCNc1nc(-c2ccc3ncnc(Nc4ccc(F)c(Cl)c4)c3c2)cs1	6.69897	TRUE	<rdkit.Chem.rdchem.Mol object at 0x7facdf6625f0>
CHEMBL181742	200	nM	Clc1cc(Nc2ncnc3nn4ccccc4c23)ccc1OCc1ccccc1	6.69897	TRUE	<rdkit.Chem.rdchem.Mol object at 0x7facdf662660>
CHEMBL3325477	200	nM	CCOC(=O)C1=C(N)N(c2cccnc2)C2=C(C(=O)CCC2)C1c1cc2ccccc2n2nnnc12	6.69897	TRUE	<rdkit.Chem.rdchem.Mol object at 0x7facdf6626d0>
CHEMBL196738	200	nM	CCOC(=O)c1cn2ncnc(Nc3ccc4c(cnn4Cc4ccccc4)c3)c2c1C	6.69897	TRUE	<rdkit.Chem.rdchem.Mol object at 0x7facdf662740>
CHEMBL265629	200	nM	O=C1CN(Cc2ccn3ncnc(Nc4ccc5c(cnn5Cc5cccc(F)c5)c4)c23)CCN1	6.69897	TRUE	<rdkit.Chem.rdchem.Mol object at 0x7facdf6627b0>
CHEMBL271668	200	nM	Cc1ccc(Oc2ccc(Nc3ncnc4cccc(O[C@H](C)C(=O)NCCO)c34)cc2C)cn1	6.69897	TRUE	<rdkit.Chem.rdchem.Mol object at 0x7facdf662820>
CHEMBL483082	200	nM	Nc1nc(Nc2ccc(S(N)(=O)=O)cc2)nn1C(=O)c1sccc1-n1cccc1	6.69897	TRUE	<rdkit.Chem.rdchem.Mol object at 0x7facdf662890>
CHEMBL475600	203	nM	Fc1cccc(COc2ccc(Nc3ncnc4sc(-c5ccc[nH]5)cc34)cc2Cl)c1	6.6925	TRUE	<rdkit.Chem.rdchem.Mol object at 0x7facdf662900>
CHEMBL255490	204	nM	CO/N=C/c1c(N)ncnc1Nc1ccc(F)c(Cl)c1	6.69037	TRUE	<rdkit.Chem.rdchem.Mol object at 0x7facdf662970>
CHEMBL345109	207	nM	CN(C)CCCNC(=O)/C=C/C(=O)Nc1ccc2ncnc(Nc3cccc(Br)c3)c2c1	6.68403	TRUE	<rdkit.Chem.rdchem.Mol object at 0x7facdf6629e0>
CHEMBL496825	208	nM	O=C(NO)[C@H]1CC(CC(=O)N2CCOCC2)CC[C@@H]1C(=O)N1CCN(c2ccccc2)CC1	6.68194	TRUE	<rdkit.Chem.rdchem.Mol object at 0x7facdf662a50>
CHEMBL365606	210	nM	CCOC(=O)c1cn2ncnc(Nc3ccc4c(cnn4Cc4ccccc4)c3)c2c1C(C)C	6.67778	TRUE	<rdkit.Chem.rdchem.Mol object at 0x7facdf662ac0>
CHEMBL381376	210	nM	CCC(C)NCCCn1c(Sc2cc(OC)ccc2I)nc2c(N)ncnc21	6.67778	TRUE	<rdkit.Chem.rdchem.Mol object at 0x7facdf662b30>
CHEMBL460731	210	nM	CS(=O)(=O)CCNCCCCOc1ccc2ncnc(Nc3ccc(F)c(Cl)c3)c2c1	6.67778	TRUE	<rdkit.Chem.rdchem.Mol object at 0x7facdf662ba0>
CHEMBL201162	210	nM	CCC(CC)NCCCn1c(Sc2cc(OC)ccc2I)nc2c(N)ncnc21	6.67778	TRUE	<rdkit.Chem.rdchem.Mol object at 0x7facdf662c10>
CHEMBL3680376	212.11	nM	COc1cc2ncnc(Nc3ccc(F)c(Cl)c3)c2cc1NC(=O)/C=C/CN1CCCC(F)C1	6.67344	TRUE	<rdkit.Chem.rdchem.Mol object at 0x7facdf662c80>
CHEMBL457250	220	nM	O=C(O[C@H]1CN[C@H](C#Cc2cc3ncnc(Nc4ccc(Sc5ccccn5)cc4)c3s2)C1)N1CCOCC1	6.65758	TRUE	<rdkit.Chem.rdchem.Mol object at 0x7facdf662cf0>
CHEMBL596761	225.2	nM	COc1cc2ncnc(NCc3ccccc3)c2cc1OCCCCCCC(=O)NO	6.64743	TRUE	<rdkit.Chem.rdchem.Mol object at 0x7facdf662d60>
CHEMBL497032	226	nM	O=C(NO)[C@H]1CC(CC(=O)N2CC[C@@H](O)C2)CC[C@@H]1C(=O)N1CCN(c2ccccc2)CC1	6.64589	TRUE	<rdkit.Chem.rdchem.Mol object at 0x7facdf662dd0>
CHEMBL230786	230	nM	COCC(=O)NCC#Cc1ccc2ncnc(Nc3ccc(Oc4cccc(C(=O)NC5CCC5)c4)c(C)c3)c2c1	6.63827	TRUE	<rdkit.Chem.rdchem.Mol object at 0x7facdf662e40>
CHEMBL387202	230	nM	CN1CC2(CC2)C[C@H](C(=O)NO)[C@H]1C(=O)N1CCN(c2ccccc2)CC1	6.63827	TRUE	<rdkit.Chem.rdchem.Mol object at 0x7facdf662eb0>
CHEMBL2408209	230	nM	CNC(=O)CN1CCCC(Oc2cc3c(Nc4cccc(Cl)c4F)ncnc3cc2OC)C1	6.63827	TRUE	<rdkit.Chem.rdchem.Mol object at 0x7facdf662f20>
CHEMBL256995	230	nM	C[C@@H](Oc1cccc2ncnc(Nc3ccc4c(cnn4Cc4cscn4)c3)c12)C(=O)N(C)C	6.63827	TRUE	<rdkit.Chem.rdchem.Mol object at 0x7facdf662f90>
CHEMBL5171922	230	nM	FC(F)(F)c1ccc(/C=C/c2nc(CNc3cccc(Br)c3)co2)cc1	6.63827	TRUE	<rdkit.Chem.rdchem.Mol object at 0x7facdf663040>
CHEMBL3114700	230	nM	C#Cc1cccc(Nc2ncnc3cc4c(cc23)N(C(=O)/C=C/CN2CCCC2)CCO4)c1	6.63827	TRUE	<rdkit.Chem.rdchem.Mol object at 0x7facdf6630b0>
CHEMBL517907	234	nM	C#Cc1cccc(Nc2ncnc3ccc(OCCCCNCCS(C)(=O)=O)cc23)c1	6.63078	TRUE	<rdkit.Chem.rdchem.Mol object at 0x7facdf663120>
CHEMBL14952	234	nM	CS(=O)(=O)CCNCCCOc1ccc2ncnc(Nc3ccc(OCc4ccccc4)cc3)c2c1	6.63078	TRUE	<rdkit.Chem.rdchem.Mol object at 0x7facdf663190>
CHEMBL1091613	240	nM	O=C(Nc1cccc(-c2nc3sccn3c2-c2ccncc2)c1)c1ccccc1Cl	6.61979	TRUE	<rdkit.Chem.rdchem.Mol object at 0x7facdf663200>
CHEMBL193368	240	nM	CCc1c(C(=O)OCCCn2ccnc2)cn2ncnc(Nc3ccc4c(cnn4Cc4ccccc4)c3)c12	6.61979	TRUE	<rdkit.Chem.rdchem.Mol object at 0x7facdf6632e0>
CHEMBL939	240	nM	COc1cc2ncnc(Nc3ccc(F)c(Cl)c3)c2cc1OCCCN1CCOCC1	6.61979	TRUE	<rdkit.Chem.rdchem.Mol object at 0x7facdf663350>
CHEMBL257410	240	nM	CNC(=O)[C@@H](C)Oc1cccc2ncnc(Nc3ccc4c(cnn4Cc4nccs4)c3)c12	6.61979	TRUE	<rdkit.Chem.rdchem.Mol object at 0x7facdf6633c0>
CHEMBL248890	240	nM	OCc1cccc2[nH]c(-c3n[nH]c4ncc(-c5cncc6ccccc56)cc34)nc12	6.61979	TRUE	<rdkit.Chem.rdchem.Mol object at 0x7facdf663430>
CHEMBL5176561	244	nM	CCC(=O)NNC(=O)c1csc2ncc(-c3ccc(C)cc3)n12	6.61261	TRUE	<rdkit.Chem.rdchem.Mol object at 0x7facdf6634a0>
CHEMBL3680377	247.12	nM	COc1cc2ncnc(Nc3ccc(F)c(Cl)c3)c2cc1NC(=O)/C=C/CN1CCC(F)CC1	6.60709	TRUE	<rdkit.Chem.rdchem.Mol object at 0x7facdf663510>
CHEMBL394463	250	nM	Cc1ccn2ncnc(Nc3ccc4c(cnn4Cc4cccnc4)c3)c12	6.60206	TRUE	<rdkit.Chem.rdchem.Mol object at 0x7facdf663580>
CHEMBL4561606	250	nM	O=C(/C=C/CN1CCCC1)N1CCOc2cc3ncnc(Nc4ccc(F)c(Cl)c4)c3cc21	6.60206	TRUE	<rdkit.Chem.rdchem.Mol object at 0x7facdf6635f0>
CHEMBL2408210	250	nM	CNC(=O)CN1CCC(Oc2cc3c(Nc4cccc(Cl)c4F)ncnc3cc2OC)C1	6.60206	TRUE	<rdkit.Chem.rdchem.Mol object at 0x7facdf663660>
CHEMBL248877	250	nM	Nc1ncnc2c1c(-c1ccc3nc(Cc4cccs4)[nH]c3c1)nn2[C@H]1CC[C@H](N2CCOCC2)CC1	6.60206	TRUE	<rdkit.Chem.rdchem.Mol object at 0x7facdf6636d0>
CHEMBL5187375	250	nM	Cc1nn(-c2ccc(F)cc2)c2c(Nc3ccc(F)c(Cl)c3)ncnc12	6.60206	TRUE	<rdkit.Chem.rdchem.Mol object at 0x7facdf663740>
CHEMBL395883	250	nM	COc1cn2ncnc(Nc3ccc4c(cnn4Cc4cccc(F)c4)c3)c2c1COC[C@@H]1CNCCO1	6.60206	TRUE	<rdkit.Chem.rdchem.Mol object at 0x7facdf6637b0>
CHEMBL3114690	250	nM	C#Cc1cccc(Nc2ncnc3cc4c(cc23)N(C(=O)/C=C/CN(C)C)CCO4)c1	6.60206	TRUE	<rdkit.Chem.rdchem.Mol object at 0x7facdf663820>
CHEMBL291126	250	nM	O=C1NC(=O)c2c1c1c3ccccc3n3c1c1c2c2ccccc2n1[C@@H]1O[C@H]3C[C@@H]1CO	6.60206	TRUE	<rdkit.Chem.rdchem.Mol object at 0x7facdf663890>
CHEMBL3114687	250	nM	C#Cc1cccc(Nc2ncnc3cc4c(cc23)N(C(=O)/C=C/CN(CC)CC)CCO4)c1	6.60206	TRUE	<rdkit.Chem.rdchem.Mol object at 0x7facdf663900>
CHEMBL2408047	250	nM	COCCNC(=O)CN1CCC(Oc2cc3c(Nc4cccc(Cl)c4F)ncnc3cc2OC)CC1	6.60206	TRUE	<rdkit.Chem.rdchem.Mol object at 0x7facdf663970>
CHEMBL4792279	254	nM	Cc1nn(-c2ccc(F)cc2)c2ncnc(Nc3ccc(F)c(Cl)c3)c12	6.59517	TRUE	<rdkit.Chem.rdchem.Mol object at 0x7facdf6639e0>
CHEMBL14932	263	nM	Oc1ccc2ncnc(Nc3ccc(OCc4ccccc4)cc3)c2c1	6.58004	TRUE	<rdkit.Chem.rdchem.Mol object at 0x7facdf663ac0>
CHEMBL2408050	264	nM	CNC(=O)CN1CCC(Oc2cc3c(Nc4ccc(F)c(Cl)c4)ncnc3cc2OC)CC1	6.5784	TRUE	<rdkit.Chem.rdchem.Mol object at 0x7facdf663b30>
CHEMBL4752700	268	nM	C=CC(=O)Nc1ccc2nccc(Oc3ccc(C(=O)Nc4cc(CC)ccn4)cc3)c2c1	6.57187	TRUE	<rdkit.Chem.rdchem.Mol object at 0x7facdf663ba0>
CHEMBL503638	270	nM	CCOC(=O)N1CCN([C@H]2CC[C@H](n3nc(-c4ccc5nc(Cc6ccccc6OC)[nH]c5c4)c4c(N)ncnc43)CC2)CC1	6.56864	TRUE	<rdkit.Chem.rdchem.Mol object at 0x7facdf663c10>
CHEMBL3633940	275	nM	NC(=O)Nc1ccc(C(=O)Nc2ccc3ncnc(Nc4ccc(F)c(Cl)c4)c3c2)cc1	6.56067	TRUE	<rdkit.Chem.rdchem.Mol object at 0x7facdf663c80>
CHEMBL191635	280	nM	C#CCCCn1c(Sc2cc(OC)ccc2I)nc2c(N)ncnc21	6.55284	TRUE	<rdkit.Chem.rdchem.Mol object at 0x7facdf663cf0>
CHEMBL246491	280	nM	COC(=O)COCc1ccn2ncnc(Nc3ccc4c(cnn4Cc4cccc(F)c4)c3)c12	6.55284	TRUE	<rdkit.Chem.rdchem.Mol object at 0x7facdf663d60>
CHEMBL3981041	286	nM	CCC(=O)Nc1cc2c(Nc3ccc4c(ccn4S(=O)(=O)c4ccccc4)c3)ncnc2cc1OC	6.54363	TRUE	<rdkit.Chem.rdchem.Mol object at 0x7facdf663dd0>
CHEMBL3633928	287	nM	NC(=O)Nc1ccc2ncnc(Nc3ccc(OCc4cccc(F)c4)c(Cl)c3)c2c1	6.54212	TRUE	<rdkit.Chem.rdchem.Mol object at 0x7facdf663e40>
CHEMBL3114686	290	nM	C#Cc1cccc(Nc2ncnc3cc4c(cc23)N(C(=O)/C=C/CN2CCCCC2C)CCO4)c1	6.5376	TRUE	<rdkit.Chem.rdchem.Mol object at 0x7facdf663eb0>
CHEMBL3114688	290	nM	C#Cc1cccc(Nc2ncnc3cc4c(cc23)N(C(=O)/C=C/CN2CCCCC2)CCO4)c1	6.5376	TRUE	<rdkit.Chem.rdchem.Mol object at 0x7facdf663f20>
CHEMBL1358485	290	nM	CCN(CC)CC1CCN(c2ncc3ncnc(Nc4ccc(F)c(Cl)c4)c3n2)CC1	6.5376	TRUE	<rdkit.Chem.rdchem.Mol object at 0x7facdf663f90>
CHEMBL3936505	290	nM	CCOc1cc2ncnc(Nc3ccc(NS(=O)(=O)c4ccccc4)cc3)c2cc1NC(=O)/C=C/CN1CCN(C)CC1	6.5376	TRUE	<rdkit.Chem.rdchem.Mol object at 0x7facdf664040>
CHEMBL596964	295.4	nM	COc1cc2ncnc(NCc3ccc(F)cc3)c2cc1OCCCCCCC(=O)NO	6.52959	TRUE	<rdkit.Chem.rdchem.Mol object at 0x7facdf6640b0>
CHEMBL3133824	298	nM	O=S(=O)(c1ccc2[nH]c3nccc(Nc4cccc(O)c4)c3c2c1)N1CCOCC1	6.52578	TRUE	<rdkit.Chem.rdchem.Mol object at 0x7facdf664120>
CHEMBL114593	300	nM	COCC#CC(=O)Nc1ccc2ncc(C#N)c(Nc3cccc(Br)c3)c2c1	6.52288	TRUE	<rdkit.Chem.rdchem.Mol object at 0x7facdf664190>
CHEMBL202621	300	nM	O=C(C#CCN1CCOCC1)Nc1ccc2ncnc(Nc3ccc(F)c(Cl)c3)c2c1	6.52288	TRUE	<rdkit.Chem.rdchem.Mol object at 0x7facdf664200>
CHEMBL94061	301	nM	CN(C)C/C=C/C(=O)Nc1ccc2ncnc(Nc3cccc(Br)c3)c2c1	6.52143	TRUE	<rdkit.Chem.rdchem.Mol object at 0x7facdf664270>
CHEMBL15202	309	nM	COc1ccc2ncnc(Nc3ccc(OCc4ccccc4)cc3)c2c1	6.51004	TRUE	<rdkit.Chem.rdchem.Mol object at 0x7facdf6642e0>
CHEMBL398388	310	nM	NC(=O)C1CCN(Cc2ccn3ncnc(Nc4ccc5c(cnn5Cc5cccc(F)c5)c4)c23)CC1	6.50864	TRUE	<rdkit.Chem.rdchem.Mol object at 0x7facdf664350>
CHEMBL3133823	310	nM	Clc1ccc(Nc2ccnc3[nH]c4ccccc4c23)cc1	6.50864	TRUE	<rdkit.Chem.rdchem.Mol object at 0x7facdf6643c0>
CHEMBL394462	310	nM	Cc1ccn2ncnc(Nc3ccc4c(cnn4Cc4ccccn4)c3)c12	6.50864	TRUE	<rdkit.Chem.rdchem.Mol object at 0x7facdf664430>
CHEMBL1683966	318	nM	Cc1ncnc(Nc2ccc(OCc3cccc(F)c3)c(Cl)c2)c1/C=C/C(=O)NCCN1CCOCC1	6.49757	TRUE	<rdkit.Chem.rdchem.Mol object at 0x7facdf6644a0>
CHEMBL2441565	319	nM	CN(C)C/C=C/C(=O)N1CCOc2cc3ncnc(Nc4ccc(F)c(Cl)c4)c3cc21	6.49621	TRUE	<rdkit.Chem.rdchem.Mol object at 0x7facdf664510>
CHEMBL3357635	324.4	nM	COc1cc2ncnc(Nc3ccc(F)c(Cl)c3)c2cc1NC(=O)/C(F)=C/CN1CCCCC1	6.48892	TRUE	<rdkit.Chem.rdchem.Mol object at 0x7facdf6645f0>
CHEMBL3114701	330	nM	C#Cc1cccc(Nc2ncnc3cc4c(cc23)N(C(=O)/C=C/CN2CCC(C)CC2)CCO4)c1	6.48149	TRUE	<rdkit.Chem.rdchem.Mol object at 0x7facdf664660>
CHEMBL4468924	337	nM	CC1CCN(C/C=C/C(=O)N2CCOc3cc4ncnc(Nc5ccc(F)c(Cl)c5)c4cc32)CC1	6.47237	TRUE	<rdkit.Chem.rdchem.Mol object at 0x7facdf6646d0>
CHEMBL4445017	344	nM	O=C(/C=C/CN1CCCCC1)N1CCOc2cc3ncnc(Nc4ccc(F)c(Cl)c4)c3cc21	6.46344	TRUE	<rdkit.Chem.rdchem.Mol object at 0x7facdf664740>
CHEMBL540701	347	nM	C=CCOc1ccc2ncnc(Nc3ccc(OCc4ccccc4)cc3)c2c1	6.45967	TRUE	<rdkit.Chem.rdchem.Mol object at 0x7facdf6647b0>
CHEMBL258352	350	nM	CN1CCN(C(=O)COc2cccc3ncnc(Nc4ccc(OCc5ccccn5)c(Cl)c4)c23)CC1	6.45593	TRUE	<rdkit.Chem.rdchem.Mol object at 0x7facdf664820>
CHEMBL1614707	350	nM	FC(F)(F)c1ccc(/C=C/c2nc(COc3ccc(CCCCn4ccnn4)cc3)co2)cc1	6.45593	TRUE	<rdkit.Chem.rdchem.Mol object at 0x7facdf664900>
CHEMBL602728	350	nM	O=C(Nc1cccc2ccccc12)c1ccc(N(CCCl)CCCl)cc1	6.45593	TRUE	<rdkit.Chem.rdchem.Mol object at 0x7facdf664970>
CHEMBL5170804	357	nM	Cc1ccc(-c2c(CN3CCOCC3)nc3scc(C(=O)NN)n23)cc1	6.44733	TRUE	<rdkit.Chem.rdchem.Mol object at 0x7facdf6649e0>
CHEMBL252246	359	nM	O=C(NO)[C@H]1CC2(CC2)CN[C@@H]1C(=O)N1CCC(c2ccccc2)C1	6.44491	TRUE	<rdkit.Chem.rdchem.Mol object at 0x7facdf664a50>
CHEMBL201684	360	nM	C#CCCCn1c(Sc2cc(OC)ccc2I)nc2c(N)nc(F)nc21	6.4437	TRUE	<rdkit.Chem.rdchem.Mol object at 0x7facdf664ac0>
CHEMBL1645464	360	nM	Cn1ncc2cc(Nc3ncnn4ccc(CN5CCC(N)CC5)c34)ccc21	6.4437	TRUE	<rdkit.Chem.rdchem.Mol object at 0x7facdf664b30>
CHEMBL391675	360	nM	Fc1cccc(Cn2ncc3cc(Nc4ncnn5ccc(CN6CCCC6)c45)ccc32)c1	6.4437	TRUE	<rdkit.Chem.rdchem.Mol object at 0x7facdf664ba0>
CHEMBL2408052	360	nM	CNC(=O)CN1CCC(Oc2cc3c(Nc4cccc(Cl)c4)ncnc3cc2OC)CC1	6.4437	TRUE	<rdkit.Chem.rdchem.Mol object at 0x7facdf664c10>
CHEMBL379892	370	nM	COc1ccc(I)c(Sc2nc3c(N)ncnc3n2CCC=C(C)C)c1	6.4318	TRUE	<rdkit.Chem.rdchem.Mol object at 0x7facdf664c80>
CHEMBL3133832	376	nM	O=S(=O)(c1ccc2[nH]c3nccc(Nc4cccc(O)c4)c3c2c1)N1CCN(CCO)CC1	6.42481	TRUE	<rdkit.Chem.rdchem.Mol object at 0x7facdf664cf0>
CHEMBL91867	378	nM	CC#CC(=O)Nc1ccc2ncnc(Nc3cccc(Br)c3)c2c1	6.42251	TRUE	<rdkit.Chem.rdchem.Mol object at 0x7facdf664d60>
CHEMBL326280	380	nM	COCC#CC(=O)Nc1cc2c(Nc3cccc(Br)c3)c(C#N)cnc2cc1OC	6.42022	TRUE	<rdkit.Chem.rdchem.Mol object at 0x7facdf664dd0>
CHEMBL396079	380	nM	c1ccc(Cn2ncc3cc(Nc4ncnn5ccc(COC[C@@H]6CNCCO6)c45)ccc32)nc1	6.42022	TRUE	<rdkit.Chem.rdchem.Mol object at 0x7facdf664e40>
CHEMBL414631	380	nM	COCOC#CC(=O)Nc1ccc2ncc(C#N)c(Nc3cccc(Br)c3)c2c1	6.42022	TRUE	<rdkit.Chem.rdchem.Mol object at 0x7facdf664eb0>
CHEMBL4458843	384	nM	CC1CCCCN1C/C=C/C(=O)N1CCOc2cc3ncnc(Nc4ccc(F)c(Cl)c4)c3cc21	6.41567	TRUE	<rdkit.Chem.rdchem.Mol object at 0x7facdf664f20>
CHEMBL3929484	386.1	nM	O=C(CCCCCn1cc(-c2ccc3ncnc(Nc4cccc(Cl)c4F)c3c2)nn1)NO	6.4133	TRUE	<rdkit.Chem.rdchem.Mol object at 0x7facdf664f90>
CHEMBL4166412	390	nM	NS(=O)(=O)c1ccc(-n2c(SCC(=O)Nc3cnc4ccccc4c3)nc3cc4ccccc4cc3c2=O)cc1	6.40894	TRUE	<rdkit.Chem.rdchem.Mol object at 0x7facdf665040>
CHEMBL3133828	390	nM	COc1cccc(Nc2ccnc3[nH]c4ccc(S(=O)(=O)N5CCNCC5)cc4c23)c1	6.40894	TRUE	<rdkit.Chem.rdchem.Mol object at 0x7facdf6650b0>
CHEMBL425738	390	nM	CCOC(=O)c1cc2c(Nc3ccc4c(cnn4Cc4ccccc4)c3)ncnn2c1	6.40894	TRUE	<rdkit.Chem.rdchem.Mol object at 0x7facdf665120>
CHEMBL3934034	404	nM	CCC(=O)Nc1cc2c(Nc3ccc(OCc4ccccc4)cc3)ncnc2cc1OC	6.39362	TRUE	<rdkit.Chem.rdchem.Mol object at 0x7facdf665190>
CHEMBL3930316	406	nM	CCC(=O)Nc1cc2c(Nc3ccc(F)c(Cl)c3)ncnc2cc1OC	6.39147	TRUE	<rdkit.Chem.rdchem.Mol object at 0x7facdf665200>
CHEMBL589588	410	nM	COc1ccc(NC(=O)c2ccc(N(CCCl)CCCl)cc2)cc1	6.38722	TRUE	<rdkit.Chem.rdchem.Mol object at 0x7facdf665270>
CHEMBL2408048	410	nM	COc1cc2ncnc(Nc3cccc(Cl)c3F)c2cc1OC1CCN(CC(=O)NC(C)C)CC1	6.38722	TRUE	<rdkit.Chem.rdchem.Mol object at 0x7facdf6652e0>
CHEMBL247127	410	nM	c1cncc(Cn2ncc3cc(Nc4ncnn5ccc(COC[C@@H]6CNCCO6)c45)ccc32)c1	6.38722	TRUE	<rdkit.Chem.rdchem.Mol object at 0x7facdf665350>
CHEMBL3930965	413	nM	COc1cc2ncnc(Nc3ccc(Cc4ccccn4)cc3)c2cc1NC(=O)/C=C/CN1CCCC1	6.38405	TRUE	<rdkit.Chem.rdchem.Mol object at 0x7facdf6653c0>
CHEMBL93783	414	nM	CN(C/C=C/C(=O)Nc1ccc2ncnc(Nc3cccc(Br)c3)c2c1)CCO	6.383	TRUE	<rdkit.Chem.rdchem.Mol object at 0x7facdf665430>
CHEMBL3943512	419	nM	CCC(=O)Nc1cc2c(Nc3ccc(Oc4ccccc4)cc3)ncnc2cc1OC	6.37779	TRUE	<rdkit.Chem.rdchem.Mol object at 0x7facdf6654a0>
CHEMBL246489	420	nM	COCCOCc1ccn2ncnc(Nc3ccc4c(cnn4Cc4cccc(F)c4)c3)c12	6.37675	TRUE	<rdkit.Chem.rdchem.Mol object at 0x7facdf665580>
CHEMBL394056	420	nM	COCc1ccn2ncnc(Nc3ccc4c(cnn4Cc4cccc(F)c4)c3)c12	6.37675	TRUE	<rdkit.Chem.rdchem.Mol object at 0x7facdf6655f0>
CHEMBL247101	430	nM	Cc1ccn2ncnc(Nc3ccc(OCc4cccc(F)c4)c(Cl)c3)c12	6.36653	TRUE	<rdkit.Chem.rdchem.Mol object at 0x7facdf665660>
CHEMBL255236	435	nM	COc1ccccc1CO/N=C/c1c(N)ncnc1Nc1ccc2c(cnn2Cc2cccc(F)c2)c1	6.36151	TRUE	<rdkit.Chem.rdchem.Mol object at 0x7facdf6656d0>
CHEMBL5207091	440	nM	Cc1ccccc1NCc1coc(/C=C/c2ccc(C(F)(F)F)cc2)n1	6.35655	TRUE	<rdkit.Chem.rdchem.Mol object at 0x7facdf665740>
CHEMBL257859	440	nM	Clc1cc(Nc2ncnc3[nH]nc(OCCCN4CCOCC4)c23)ccc1OCc1ccccn1	6.35655	TRUE	<rdkit.Chem.rdchem.Mol object at 0x7facdf6657b0>
CHEMBL449949	450	nM	O=C(O[C@H]1CN[C@H](C#Cc2cc3ncnc(Nc4ccc(OCc5cccc(F)c5)nc4)c3s2)C1)N1CCOCC1	6.34679	TRUE	<rdkit.Chem.rdchem.Mol object at 0x7facdf665820>
CHEMBL115440	450	nM	COCCOCC#CC(=O)Nc1ccc2ncc(C#N)c(Nc3cccc(Br)c3)c2c1	6.34679	TRUE	<rdkit.Chem.rdchem.Mol object at 0x7facdf665890>
CHEMBL3961532	458	nM	CCC(=O)Nc1cc2c(Nc3ccc(OCc4cccc(F)c4)c(Cl)c3)ncnc2cc1OC	6.33913	TRUE	<rdkit.Chem.rdchem.Mol object at 0x7facdf665900>
CHEMBL94066	458	nM	C=C(CN1CCOCC1)C(=O)Nc1ccc2ncnc(Nc3cccc(Br)c3)c2c1	6.33913	TRUE	<rdkit.Chem.rdchem.Mol object at 0x7facdf665970>
CHEMBL202398	464	nM	CCCCN(CC#CC(=O)Nc1ccc2ncnc(Nc3ccc(F)c(Cl)c3)c2c1)CCCC	6.33348	TRUE	<rdkit.Chem.rdchem.Mol object at 0x7facdf6659e0>
CHEMBL496212	470	nM	O=C(NO)[C@H]1CCCC[C@@H]1C(=O)N1CCN(c2ccccc2)CC1	6.3279	TRUE	<rdkit.Chem.rdchem.Mol object at 0x7facdf665a50>
CHEMBL500591	470	nM	N#Cc1c(N)ncnc1Nc1ccc(OCc2ccccc2)c(Cl)c1	6.3279	TRUE	<rdkit.Chem.rdchem.Mol object at 0x7facdf665ac0>
CHEMBL596957	478.2	nM	COc1cc2ncnc(NCc3ccc(Cl)c(F)c3)c2cc1OCCCCCCC(=O)NO	6.32039	TRUE	<rdkit.Chem.rdchem.Mol object at 0x7facdf665b30>
CHEMBL4443188	482.1	nM	COC[C@H](C)Oc1cc2ncnc(Nc3ccc(F)c(Cl)c3)c2cc1NC(=O)/C=C/CN(C)C	6.31686	TRUE	<rdkit.Chem.rdchem.Mol object at 0x7facdf665ba0>
CHEMBL258694	500	nM	Cc1nnc(-c2cn3ncnc(Nc4cnc5[nH]ccc5c4)c3c2C(C)C)o1	6.30103	TRUE	<rdkit.Chem.rdchem.Mol object at 0x7facdf665c10>
CHEMBL372293	500	nM	CCc1c(C(=O)N(C)C)cn2ncnc(Nc3ccc4c(cnn4Cc4ccccc4)c3)c12	6.30103	TRUE	<rdkit.Chem.rdchem.Mol object at 0x7facdf665c80>
CHEMBL3957801	509	nM	CCC(=O)Nc1cc2c(Nc3ccc(F)c(Cl)c3)ncnc2cc1OCCCN1CCOCC1	6.29328	TRUE	<rdkit.Chem.rdchem.Mol object at 0x7facdf665cf0>
CHEMBL3746557	510	nM	CC(=O)N1N=C(c2ccc(C(F)(F)F)cc2)CC1c1ccc(C(=O)OCCn2c([N+](=O)[O-])cnc2C)cc1	6.29243	TRUE	<rdkit.Chem.rdchem.Mol object at 0x7facdf665d60>
CHEMBL397122	510	nM	C[C@@H](c1cccc(F)c1)n1ncc2cc(Nc3ncnn4ccc(COC[C@@H]5CNCCO5)c34)ccc21	6.29243	TRUE	<rdkit.Chem.rdchem.Mol object at 0x7facdf665dd0>
CHEMBL3936761	530	nM	C=CC(=O)N1CCC([C@@H]2CCNc3c(C(N)=O)c(-c4ccc(Oc5ccccc5)cc4)nn32)CC1	6.27572	TRUE	<rdkit.Chem.rdchem.Mol object at 0x7facdf665e40>
CHEMBL230680	550	nM	COCC(=O)NCC#Cc1ccc2ncnc(Nc3ccc(OC4CCN(C(=O)C5CCCO5)CC4)c(C)c3)c2c1	6.25964	TRUE	<rdkit.Chem.rdchem.Mol object at 0x7facdf665eb0>
CHEMBL2408054	550	nM	CNC(=O)CCN1CCC(Oc2cc3c(Nc4cccc(Cl)c4F)ncnc3cc2OC)CC1	6.25964	TRUE	<rdkit.Chem.rdchem.Mol object at 0x7facdf665f20>
CHEMBL598407	556.9	nM	COc1cc2ncnc(N[C@@H](C)c3ccc(Cl)cc3)c2cc1OCCCCCCC(=O)NO	6.25422	TRUE	<rdkit.Chem.rdchem.Mol object at 0x7facdf666040>
CHEMBL402149	557	nM	CO/N=C/c1c(N)ncnc1Nc1cccc(Br)c1	6.25414	TRUE	<rdkit.Chem.rdchem.Mol object at 0x7facdf6660b0>
CHEMBL1928945	559	nM	Nc1cccc(Oc2cc(Nc3ccc(OCc4cccc(F)c4)c(Cl)c3)ncn2)c1	6.25259	TRUE	<rdkit.Chem.rdchem.Mol object at 0x7facdf666120>
CHEMBL246493	560	nM	Fc1cccc(COc2ccc(Nc3ncnn4ccc(COC[C@@H]5CNCCO5)c34)cc2Cl)c1	6.25181	TRUE	<rdkit.Chem.rdchem.Mol object at 0x7facdf666190>
CHEMBL245868	560	nM	CN(C)CCCOCc1ccn2ncnc(Nc3ccc4c(cnn4Cc4cccc(F)c4)c3)c12	6.25181	TRUE	<rdkit.Chem.rdchem.Mol object at 0x7facdf666200>
CHEMBL3133829	576	nM	CCOc1cccc(Nc2ccnc3[nH]c4ccc(S(=O)(=O)N5CCNCC5)cc4c23)c1	6.23958	TRUE	<rdkit.Chem.rdchem.Mol object at 0x7facdf666270>
CHEMBL246492	590	nM	Fc1cccc(Cn2ncc3cc(Nc4ncnn5ccc(COC[C@@H]6COCCN6)c45)ccc32)c1	6.22915	TRUE	<rdkit.Chem.rdchem.Mol object at 0x7facdf6662e0>
CHEMBL3828021	590	nM	C#Cc1cccc(Nc2ncnc3ccc(-c4cnn(C)c4)cc23)c1	6.22915	TRUE	<rdkit.Chem.rdchem.Mol object at 0x7facdf666350>
CHEMBL2205030	590	nM	O=S1(=O)N=S(c2ccc(Br)cc2)c2ccncc21	6.22915	TRUE	<rdkit.Chem.rdchem.Mol object at 0x7facdf6663c0>
CHEMBL202425	597	nM	CCN(CC)CC#CC(=O)Nc1cc2c(Nc3ccc(F)c(Cl)c3)ncnc2cn1	6.22403	TRUE	<rdkit.Chem.rdchem.Mol object at 0x7facdf6664a0>
CHEMBL231885	610	nM	CC(=O)N1CCN(Cc2ccn3ncnc(Nc4ccc5c(cnn5Cc5cccc(F)c5)c4)c23)CC1	6.21467	TRUE	<rdkit.Chem.rdchem.Mol object at 0x7facdf666510>
CHEMBL4103370	610	nM	Clc1ccc(-c2nnc(Cc3nc4ccccc4[nH]3)o2)cc1	6.21467	TRUE	<rdkit.Chem.rdchem.Mol object at 0x7facdf666580>
CHEMBL1080272	620	nM	O=C(NCCN1CCCC1)c1cc2cnnc(Nc3ccc(OCc4cccc(F)c4)c(Cl)c3)c2[nH]1	6.20761	TRUE	<rdkit.Chem.rdchem.Mol object at 0x7facdf6665f0>
CHEMBL442754	634	nM	COCCN(C)C/C=C/C(=O)Nc1ccc2ncnc(Nc3cccc(Br)c3)c2c1	6.19791	TRUE	<rdkit.Chem.rdchem.Mol object at 0x7facdf6666d0>
CHEMBL3968839	642	nM	CCC(=O)Nc1cc2c(Nc3ccc4c(ccn4Cc4ccccn4)c3)ncnc2cc1OC	6.19246	TRUE	<rdkit.Chem.rdchem.Mol object at 0x7facdf666740>
CHEMBL2408049	670	nM	COc1cc2ncnc(Nc3cccc(Cl)c3F)c2cc1OC1CCN(CC(=O)N(C)C)CC1	6.17393	TRUE	<rdkit.Chem.rdchem.Mol object at 0x7facdf666820>
CHEMBL4549542	674	nM	CN1CCN(C/C=C/C(=O)N2CCOc3cc4ncnc(Nc5ccc(F)c(Cl)c5)c4cc32)CC1	6.17134	TRUE	<rdkit.Chem.rdchem.Mol object at 0x7facdf666890>
CHEMBL3828269	676	nM	Cn1cc(-c2ccc3ncnc(Nc4ccc(F)c(Cl)c4)c3c2)cn1	6.17005	TRUE	<rdkit.Chem.rdchem.Mol object at 0x7facdf666900>
CHEMBL372692	680	nM	CCc1c(CC(=O)O)cn2ncnc(Nc3ccc4c(cnn4Cc4ccccc4)c3)c12	6.16749	TRUE	<rdkit.Chem.rdchem.Mol object at 0x7facdf666970>
CHEMBL3133830	689	nM	COc1cccc(Nc2ccnc3[nH]c4ccc(S(=O)(=O)N5CCN(CCO)CC5)cc4c23)c1	6.16178	TRUE	<rdkit.Chem.rdchem.Mol object at 0x7facdf6669e0>
CHEMBL3633775	706	nM	NC(=O)Nc1ccc2ncnc(Nc3ccc(Oc4ccc(Cl)c(Cl)c4)c(Cl)c3)c2c1	6.1512	TRUE	<rdkit.Chem.rdchem.Mol object at 0x7facdf666a50>
CHEMBL479800	709	nM	Fc1cccc(COc2ccc(Nc3ncnc4cc(-c5ccco5)sc34)cc2Cl)c1	6.14935	TRUE	<rdkit.Chem.rdchem.Mol object at 0x7facdf666ac0>
CHEMBL1421	710	nM	Cc1nc(Nc2ncc(C(=O)Nc3c(C)cccc3Cl)s2)cc(N2CCN(CCO)CC2)n1	6.14874	TRUE	<rdkit.Chem.rdchem.Mol object at 0x7facdf666b30>
CHEMBL458997	710	nM	CNC(=O)c1ccccc1Nc1nc(Nc2ccc(N3CCOCC3)cc2OC)ncc1Cl	6.14874	TRUE	<rdkit.Chem.rdchem.Mol object at 0x7facdf666ba0>
CHEMBL1922903	720	nM	N#Cc1ccc(Oc2ccc(Nc3ncnc4cc[nH]c34)cc2Cl)cc1	6.14267	TRUE	<rdkit.Chem.rdchem.Mol object at 0x7facdf666c10>
CHEMBL373025	730	nM	CCc1c(CO)cn2ncnc(Nc3ccc4c(cnn4Cc4ccccc4)c3)c12	6.13668	TRUE	<rdkit.Chem.rdchem.Mol object at 0x7facdf666c80>
CHEMBL419501	733	nM	COC[C@H]1CCCN1C/C=C/C(=O)Nc1ccc2ncnc(Nc3cccc(Br)c3)c2c1	6.1349	TRUE	<rdkit.Chem.rdchem.Mol object at 0x7facdf666cf0>
CHEMBL521284	733	nM	c1ccc(Oc2ccc(Nc3ccnc4ccccc34)cc2)cc1	6.1349	TRUE	<rdkit.Chem.rdchem.Mol object at 0x7facdf666d60>
CHEMBL1683958	740	nM	Cc1ncnc(Nc2ccc(OCc3cccc(F)c3)c(Cl)c2)c1/C=N/OCCN1CCOCC1	6.13077	TRUE	<rdkit.Chem.rdchem.Mol object at 0x7facdf666dd0>
CHEMBL233324	750	nM	O=C1CCN(Cc2ccn3ncnc(Nc4ccc5c(cnn5Cc5cccc(F)c5)c4)c23)CCN1	6.12494	TRUE	<rdkit.Chem.rdchem.Mol object at 0x7facdf666e40>
CHEMBL1934621	750	nM	Cc1ncnc(Nc2ccc(OCc3cccc(F)c3)c(Cl)c2)c1C#Cc1ccccc1	6.12494	TRUE	<rdkit.Chem.rdchem.Mol object at 0x7facdf666eb0>
CHEMBL553	760	nM	C#Cc1cccc(Nc2ncnc3cc(OCCOC)c(OCCOC)cc23)c1	6.11919	TRUE	<rdkit.Chem.rdchem.Mol object at 0x7facdf666f20>
CHEMBL512391	776	nM	Nc1ncnc(Nc2ccc(OCc3ccccc3)c(Cl)c2)c1C(=O)O	6.11014	TRUE	<rdkit.Chem.rdchem.Mol object at 0x7facdf666f90>
CHEMBL461114	776	nM	Nc1ncnc(Nc2ccc(OCc3ccccc3)c(Cl)c2)c1C(=O)Nc1ccccc1	6.11014	TRUE	<rdkit.Chem.rdchem.Mol object at 0x7facdf667040>
CHEMBL379093	780	nM	Fc1cccc(COc2ccc(Nc3ncncc3C#Cc3ccccc3)cc2Cl)c1	6.10791	TRUE	<rdkit.Chem.rdchem.Mol object at 0x7facdf6670b0>
CHEMBL3964380	782	nM	CCC(=O)Nc1cc2c(Nc3ccc4c(ccn4Cc4ccco4)c3)ncnc2cc1OC	6.10679	TRUE	<rdkit.Chem.rdchem.Mol object at 0x7facdf667120>
CHEMBL3970738	798	nM	CCC(=O)Nc1cc2c(Nc3ccc(NS(=O)(=O)c4ccccc4)cc3)ncnc2cc1OC	6.098	TRUE	<rdkit.Chem.rdchem.Mol object at 0x7facdf667190>
CHEMBL3963723	800	nM	CCC(=O)Nc1cc2c(Nc3ccc4[nH]ccc4c3)ncnc2cc1OC	6.09691	TRUE	<rdkit.Chem.rdchem.Mol object at 0x7facdf667200>
CHEMBL3925158	815	nM	CCC(=O)Nc1cc2c(Nc3ccc(OCc4ccccn4)cc3)ncnc2cc1OC	6.08884	TRUE	<rdkit.Chem.rdchem.Mol object at 0x7facdf667270>
CHEMBL5201807	820	nM	Cc1cccc(-c2ccc3c(ccn3Cc3coc(/C=C/c4ccc(C(F)(F)F)cc4)n3)c2)c1	6.08619	TRUE	<rdkit.Chem.rdchem.Mol object at 0x7facdf6672e0>
CHEMBL194349	820	nM	CCOC(=O)c1cn2ncnc(Nc3ccc(Oc4ccccc4)cc3)c2c1CC	6.08619	TRUE	<rdkit.Chem.rdchem.Mol object at 0x7facdf667350>
CHEMBL1082012	843	nM	Cc1c(C(=O)NCCN2CCN(C)CC2)[nH]c2cnnc(Nc3ccc(OCc4cccc(F)c4)c(Cl)c3)c12	6.07417	TRUE	<rdkit.Chem.rdchem.Mol object at 0x7facdf6673c0>
CHEMBL245277	850	nM	C[C@@H](c1ccccc1)n1ncc2cc(Nc3ncnn4ccc(COC[C@@H]5CNCCO5)c34)ccc21	6.07058	TRUE	<rdkit.Chem.rdchem.Mol object at 0x7facdf667430>
CHEMBL3633941	855	nM	CCNC(=O)Nc1ccc(C(=O)Nc2ccc3ncnc(Nc4ccc(F)c(Cl)c4)c3c2)cc1	6.06803	TRUE	<rdkit.Chem.rdchem.Mol object at 0x7facdf6674a0>
CHEMBL2408053	860	nM	CNC(=O)CN1CCC(Oc2cc3c(Nc4cc(Cl)ccc4F)ncnc3cc2OC)CC1	6.0655	TRUE	<rdkit.Chem.rdchem.Mol object at 0x7facdf667510>
CHEMBL5189871	860	nM	Cc1cccc(NCc2coc(/C=C/c3ccc(C(F)(F)F)cc3)n2)c1	6.0655	TRUE	<rdkit.Chem.rdchem.Mol object at 0x7facdf667580>
CHEMBL3828079	874	nM	Cn1cc(-c2ccc3ncnc(Nc4ccc5ncccc5c4)c3c2)cn1	6.05849	TRUE	<rdkit.Chem.rdchem.Mol object at 0x7facdf6676d0>
CHEMBL2325087	880	nM	NC(=S)N1N=C(c2ccc(Cl)c(Cl)c2)CC1c1ccc2ccccc2c1	6.05552	TRUE	<rdkit.Chem.rdchem.Mol object at 0x7facdf667740>
CHEMBL1645468	880	nM	CC(C)Nc1ncnn2ccc(CN3CCC(N)CC3)c12	6.05552	TRUE	<rdkit.Chem.rdchem.Mol object at 0x7facdf6677b0>
CHEMBL4084249	910	nM	COc1ccc(-c2nnc(Cc3nc4ccccc4[nH]3)o2)cc1	6.04096	TRUE	<rdkit.Chem.rdchem.Mol object at 0x7facdf667890>
CHEMBL3114699	930	nM	C#Cc1cccc(Nc2ncnc3cc4c(cc23)N(C(=O)/C=C/CN2CCOCC2)CCO4)c1	6.03152	TRUE	<rdkit.Chem.rdchem.Mol object at 0x7facdf667900>
CHEMBL1080990	934	nM	CCOC(=O)c1[nH]c(C)c2cnnc(Nc3ccc(OCc4cccc(F)c4)c(Cl)c3)c12	6.02965	TRUE	<rdkit.Chem.rdchem.Mol object at 0x7facdf667970>
CHEMBL3923650	958	nM	CCC(=O)Nc1cc2c(Nc3ccc(NS(=O)(=O)c4ccccc4)nc3)ncnc2cc1OC	6.01863	TRUE	<rdkit.Chem.rdchem.Mol object at 0x7facdf6679e0>
CHEMBL3133817	978	nM	CC(=O)c1ccc2[nH]c3nccc(Nc4cccc([N+](=O)[O-])c4)c3c2c1	6.00966	TRUE	<rdkit.Chem.rdchem.Mol object at 0x7facdf667ac0>
CHEMBL3133820	978	nM	Cc1ccccc1Nc1ccnc2[nH]c3ccccc3c12	6.00966	TRUE	<rdkit.Chem.rdchem.Mol object at 0x7facdf667b30>
CHEMBL2441561	996	nM	O=C(/C=C/CN1CCOCC1)N1CCOc2cc3ncnc(Nc4ccc(F)c(Cl)c4)c3cc21	6.00174	TRUE	<rdkit.Chem.rdchem.Mol object at 0x7facdf667ba0>
CHEMBL3921390	1000	nM	COc1cc2c(Nc3ccc(Cl)c(Cl)c3C)ncnc2cc1OCC1CN(C)CCO1	6	TRUE	<rdkit.Chem.rdchem.Mol object at 0x7facdf667c10>
CHEMBL3921861	1000	nM	COc1cc2c(Nc3ccc(Br)c(Cl)c3)ncnc2cc1O[C@H]1CO[C@H]2[C@@H]1OC[C@@H]2N1CCOCC1	6	TRUE	<rdkit.Chem.rdchem.Mol object at 0x7facdf667c80>
CHEMBL4568087	1000	nM	Cn1cc(-c2cnc3c(-c4csc(C(=O)N[C@@H]5CCCC[C@@H]5N)c4)cnn3c2)cn1	6	TRUE	<rdkit.Chem.rdchem.Mol object at 0x7facdf667cf0>
CHEMBL1917092	1000	nM	COC(=O)c1ccc2c(c1)S(=O)(=O)N=S2c1ccc(Br)cc1	6	TRUE	<rdkit.Chem.rdchem.Mol object at 0x7facdf667d60>
CHEMBL3986082	1000	nM	COc1cc2c(Nc3ccc(Br)c(Cl)c3)ncnc2cc1O[C@@H]1CO[C@H]2[C@@H]1OC[C@@H]2OS(C)(=O)=O	6	TRUE	<rdkit.Chem.rdchem.Mol object at 0x7facdf667dd0>
CHEMBL3909603	1000	nM	COc1cc2c(Nc3ccc(Cl)c(Cl)c3F)ncnc2cc1OC[C@@H]1CN(C)CC(=O)N1C	6	TRUE	<rdkit.Chem.rdchem.Mol object at 0x7facdf667e40>
CHEMBL3891130	1000	nM	COc1cc2c(Nc3ccc(Br)c(Cl)c3F)ncnc2cc1OC[C@@H]1CN(C)CC(=O)N1C	6	TRUE	<rdkit.Chem.rdchem.Mol object at 0x7facdf667eb0>
CHEMBL3891059	1000	nM	COc1cc2c(Nc3ccc(C)c(Cl)c3Cl)ncnc2cc1OCC1CN(C)CCO1	6	TRUE	<rdkit.Chem.rdchem.Mol object at 0x7facdf667f20>
CHEMBL3985116	1000	nM	COc1cc2c(Nc3ccc(Cl)c(Cl)c3N3CCN(C)CC3)ncnc2cc1O[C@H]1CO[C@H]2[C@@H]1OC[C@@H]2F	6	TRUE	<rdkit.Chem.rdchem.Mol object at 0x7facdf667f90>
CHEMBL3895458	1000	nM	COc1cc2c(Nc3cccc(Br)c3C)ncnc2cc1O[C@H]1CO[C@H]2[C@@H]1OC[C@@H]2OC	6	TRUE	<rdkit.Chem.rdchem.Mol object at 0x7facdf6680b0>
CHEMBL3929354	1000	nM	COc1cc2c(Nc3ccc(Br)c(Cl)c3)ncnc2cc1O[C@H]1CO[C@H]2[C@@H]1OC[C@H]2OC	6	TRUE	<rdkit.Chem.rdchem.Mol object at 0x7facdf668120>
CHEMBL3893058	1000	nM	COc1cc2c(Nc3ccc(N4CCN(C)CC4)c(Cl)c3Cl)ncnc2cc1O[C@H]1CO[C@H]2[C@@H]1OC[C@@H]2F	6	TRUE	<rdkit.Chem.rdchem.Mol object at 0x7facdf668190>
CHEMBL3971560	1000	nM	COc1cc2c(Nc3ccc(Br)c(Cl)c3)ncnc2cc1OC1CCN(C)C1	6	TRUE	<rdkit.Chem.rdchem.Mol object at 0x7facdf668200>
CHEMBL3959160	1000	nM	COc1cc2c(Nc3cccc(Cl)c3C)ncnc2cc1O[C@H]1CO[C@H]2[C@@H]1OC[C@@H]2OC	6	TRUE	<rdkit.Chem.rdchem.Mol object at 0x7facdf6682e0>
CHEMBL539947	1000	nM	CC(C)(C)c1cc(/C=C(\C#N)C(N)=S)cc(C(C)(C)C)c1O	6	TRUE	<rdkit.Chem.rdchem.Mol object at 0x7facdf668350>
CHEMBL3961417	1000	nM	COc1cc2c(Nc3ccc(Br)c(Cl)c3)ncnc2cc1O[C@H]1CO[C@H]2[C@@H]1OC[C@@H]2NC(C)=O	6	TRUE	<rdkit.Chem.rdchem.Mol object at 0x7facdf6683c0>
CHEMBL5187554	1000	nM	CC#CC(=O)N1CCC[C@H]1n1nc(-c2ccc(C(=O)Nc3ccccn3)cc2)c2c(N)ncnc21	6	TRUE	<rdkit.Chem.rdchem.Mol object at 0x7facdf668430>
CHEMBL3972940	1000	nM	COc1cc2c(Nc3ccc(Br)c(Cl)c3)ncnc2cc1O[C@H]1CO[C@H]2[C@@H]1OC[C@@H]2N1CCN(C)CC1	6	TRUE	<rdkit.Chem.rdchem.Mol object at 0x7facdf6684a0>
CHEMBL3976788	1000	nM	COc1cc2c(Nc3ccc(Br)c(Cl)c3)ncnc2cc1O[C@H]1CO[C@H]2[C@@H]1OC[C@@H]2N	6	TRUE	<rdkit.Chem.rdchem.Mol object at 0x7facdf668510>
CHEMBL3707348	1000	nM	CC#CC(=O)N1CCC[C@H]1c1nc(-c2ccc(C(=O)Nc3ccccn3)cc2)c2c(N)nccn12	6	TRUE	<rdkit.Chem.rdchem.Mol object at 0x7facdf668580>
CHEMBL3923645	1000	nM	COc1cc2c(Nc3ccc(Br)c(Cl)c3)ncnc2cc1O[C@H]1CO[C@H]2[C@@H]1OC[C@@H]2N1CCCC1	6	TRUE	<rdkit.Chem.rdchem.Mol object at 0x7facdf6685f0>
CHEMBL3945072	1000	nM	COc1cc2c(Nc3ccc(Cl)c(Cl)c3F)ncnc2cc1OC[C@@H]1CN2CCC[C@@H]2C(=O)N1	6	TRUE	<rdkit.Chem.rdchem.Mol object at 0x7facdf668660>
CHEMBL3967530	1000	nM	COc1cc2ncnc(NCc3ccc(F)c(Cl)c3)c2cc1OCCCCCCC(=O)NO	6	TRUE	<rdkit.Chem.rdchem.Mol object at 0x7facdf6686d0>
CHEMBL3910297	1000	nM	C[C@@H](Nc1ncnc2[nH]c(-c3ccc(CNCC(=O)NO)cc3)cc12)c1ccccc1	6	TRUE	<rdkit.Chem.rdchem.Mol object at 0x7facdf668740>
CHEMBL3940489	1000	nM	COc1cc2c(Nc3ccc(Cl)c(Cl)c3F)ncnc2cc1OC[C@@H]1CN2CCCC[C@H]2C(=O)N1	6	TRUE	<rdkit.Chem.rdchem.Mol object at 0x7facdf6687b0>
CHEMBL3900059	1000	nM	COc1cc2c(Nc3ccc(Cl)c(Cl)c3F)ncnc2cc1OC[C@@H]1CN2CCCC[C@@H]2C(=O)N1	6	TRUE	<rdkit.Chem.rdchem.Mol object at 0x7facdf668820>
CHEMBL3986135	1000	nM	COc1cc2c(Nc3ccc(Br)c(Cl)c3F)ncnc2cc1OC[C@@H]1CN2CCC[C@H]2C(=O)N1	6	TRUE	<rdkit.Chem.rdchem.Mol object at 0x7facdf668890>
CHEMBL3985004	1000	nM	O=C(CCCCCCOc1ccc(-c2cc3c(NCc4ccccc4)ncnc3[nH]2)cc1)NO	6	TRUE	<rdkit.Chem.rdchem.Mol object at 0x7facdf668900>
CHEMBL3983466	1000	nM	COc1cc2c(Nc3ccc(Cl)c(Cl)c3F)ncnc2cc1OC[C@@H]1CN2CCC[C@H]2C(=O)N1C	6	TRUE	<rdkit.Chem.rdchem.Mol object at 0x7facdf668970>
CHEMBL3946590	1000	nM	COc1cc2c(Nc3cc(Cl)c(Br)cc3F)ncnc2cc1O[C@@H]1C[C@H]2OC[C@H](OC)[C@H]2O1	6	TRUE	<rdkit.Chem.rdchem.Mol object at 0x7facdf6689e0>
CHEMBL3955486	1000	nM	COc1cc2c(Nc3ccc(F)c(Cl)c3F)ncnc2cc1O[C@@H]1C[C@H]2OC[C@H](OC)[C@H]2O1	6	TRUE	<rdkit.Chem.rdchem.Mol object at 0x7facdf668a50>
CHEMBL3924380	1000	nM	COc1cc2c(Nc3cc(Cl)c(Cl)cc3F)ncnc2cc1O[C@@H]1C[C@H]2OC[C@H](OC)[C@H]2O1	6	TRUE	<rdkit.Chem.rdchem.Mol object at 0x7facdf668ac0>
CHEMBL3905501	1000	nM	COc1cc2c(Nc3ccc(Br)c(Cl)c3Cl)ncnc2cc1OC[C@@H]1CN2CCOC[C@H]2CO1	6	TRUE	<rdkit.Chem.rdchem.Mol object at 0x7facdf668b30>
CHEMBL400858	1000	nM	Cc1cccc2[nH]c(-c3n[nH]c4ncc(-c5cncc6ccccc56)cc34)nc12	6	TRUE	<rdkit.Chem.rdchem.Mol object at 0x7facdf668ba0>
CHEMBL3974328	1000	nM	CN[C@H]1CO[C@H]2[C@@H]1OC[C@@H]2Oc1cc2ncnc(Nc3ccc(Br)c(Cl)c3)c2cc1OC	6	TRUE	<rdkit.Chem.rdchem.Mol object at 0x7facdf668c10>
CHEMBL3933359	1000	nM	COc1cc2c(Nc3ccc(Br)c(Cl)c3)ncnc2cc1O[C@H]1CO[C@H]2[C@@H]1OC[C@@H]2OC(C)=O	6	TRUE	<rdkit.Chem.rdchem.Mol object at 0x7facdf668c80>
CHEMBL2325101	1020	nM	Clc1ccc(C2=NN(c3ccccc3)C(c3ccc4ccccc4c3)C2)cc1Cl	5.9914	TRUE	<rdkit.Chem.rdchem.Mol object at 0x7facdf668cf0>
CHEMBL2324873	1040	nM	Cc1ccc(C2=NN(C(N)=S)C(c3ccc4ccccc4c3)C2)cc1	5.98297	TRUE	<rdkit.Chem.rdchem.Mol object at 0x7facdf668d60>
CHEMBL327023	1040	nM	N#Cc1cnc2ccc(NC(=O)C#CCN3CCSCC3)cc2c1Nc1cccc(Br)c1	5.98297	TRUE	<rdkit.Chem.rdchem.Mol object at 0x7facdf668dd0>
CHEMBL305660	1057.5	nM	CC(C)(C)c1ccc(C(=O)CCCN2CCC(OC(c3ccccc3)c3ccccc3)CC2)cc1	5.97572	TRUE	<rdkit.Chem.rdchem.Mol object at 0x7facdf668e40>
CHEMBL1958215	1070	nM	Cc1ccc(C2=NN(C3=NC(=O)CS3)C(c3ccc(Br)cc3)C2)cc1	5.97062	TRUE	<rdkit.Chem.rdchem.Mol object at 0x7facdf668eb0>
CHEMBL5187503	1070	nM	FC(F)(F)c1ccc(/C=C/c2nc(CNc3ccccc3Br)co2)cc1	5.97062	TRUE	<rdkit.Chem.rdchem.Mol object at 0x7facdf668f20>
CHEMBL400569	1070	nM	CCNCc1cncc(-c2cnc3[nH]nc(-c4nc5cc(N6CCN(C)CC6)ccc5[nH]4)c3c2)c1	5.97062	TRUE	<rdkit.Chem.rdchem.Mol object at 0x7facdf668f90>
CHEMBL3908711	1100	nM	O=C(CBr)OCCn1c(=O)oc2cc3ncnc(Nc4ccc(F)c(Cl)c4)c3cc21	5.95861	TRUE	<rdkit.Chem.rdchem.Mol object at 0x7facdf669040>
CHEMBL2408211	1100	nM	CNC(=O)CN1CC(Oc2cc3c(Nc4cccc(Cl)c4F)ncnc3cc2OC)C1	5.95861	TRUE	<rdkit.Chem.rdchem.Mol object at 0x7facdf6690b0>
CHEMBL197525	1100	nM	COc1ccc(Nc2ncnc3cccc(OC4CCN(C)CC4)c23)cc1Cl	5.95861	TRUE	<rdkit.Chem.rdchem.Mol object at 0x7facdf669120>
CHEMBL464210	1100	nM	CNC(=O)c1cc(Nc2ccc(-c3nc4ccccc4s3)cc2)ccn1	5.95861	TRUE	<rdkit.Chem.rdchem.Mol object at 0x7facdf669190>
CHEMBL3114689	1110	nM	C#Cc1cccc(Nc2ncnc3cc4c(cc23)N(C(=O)/C=C/CN2CCN(C)CC2)CCO4)c1	5.95468	TRUE	<rdkit.Chem.rdchem.Mol object at 0x7facdf669200>
CHEMBL5174917	1110	nM	COc1ccc(-c2ccc3c(ccn3Cc3coc(/C=C/c4ccc(C(F)(F)F)cc4)n3)c2)cc1	5.95468	TRUE	<rdkit.Chem.rdchem.Mol object at 0x7facdf669270>
CHEMBL2325100	1130	nM	Cc1ccc(C2=NN(c3ccccc3)C(c3ccc4ccccc4c3)C2)cc1	5.94692	TRUE	<rdkit.Chem.rdchem.Mol object at 0x7facdf6692e0>
CHEMBL3133814	1150	nM	Clc1cccc(Nc2ccnc3[nH]c4ccc(Br)cc4c23)c1	5.9393	TRUE	<rdkit.Chem.rdchem.Mol object at 0x7facdf669350>
CHEMBL3133819	1150	nM	CC(=O)c1ccc2[nH]c3nccc(Nc4cccc(Cl)c4)c3c2c1	5.9393	TRUE	<rdkit.Chem.rdchem.Mol object at 0x7facdf6693c0>
CHEMBL91925	1164	nM	CCN(CC)C/C=C/C(=O)Nc1ccc2ncnc(Nc3cccc(Br)c3)c2c1	5.93405	TRUE	<rdkit.Chem.rdchem.Mol object at 0x7facdf669430>
CHEMBL438805	1200	nM	CCCc1c(C(=O)OCC)cn2ncnc(Nc3ccc4c(cnn4Cc4ccccc4)c3)c12	5.92082	TRUE	<rdkit.Chem.rdchem.Mol object at 0x7facdf6694a0>
CHEMBL3828092	1202	nM	Fc1ccc(Nc2ncnc3ccc(-c4cnn(C5CCNCC5)c4)cc23)cc1Cl	5.9201	TRUE	<rdkit.Chem.rdchem.Mol object at 0x7facdf669510>
CHEMBL117326	1210	nM	C=C(CN(C)C)C(=O)Nc1cc2c(Nc3ccc(F)c(Cl)c3)c(C#N)cnc2cc1OCC	5.91721	TRUE	<rdkit.Chem.rdchem.Mol object at 0x7facdf669580>
CHEMBL2324871	1210	nM	NC(=S)N1N=C(c2ccc(Br)cc2)CC1c1ccc2ccccc2c1	5.91721	TRUE	<rdkit.Chem.rdchem.Mol object at 0x7facdf6695f0>
CHEMBL157128	1220	nM	COCC1CCCN1CC#CC(=O)Nc1ccc2ncc(C#N)c(Nc3cccc(Br)c3)c2c1	5.91364	TRUE	<rdkit.Chem.rdchem.Mol object at 0x7facdf669660>
CHEMBL607707	1230	nM	CCOc1cc2ncc(C#N)c(Nc3ccc(F)c(Cl)c3)c2cc1NC(=O)/C=C/CN(C)C	5.91009	TRUE	<rdkit.Chem.rdchem.Mol object at 0x7facdf669740>
CHEMBL3133825	1240	nM	COc1cccc(Nc2ccnc3[nH]c4ccc(S(=O)(=O)N5CCOCC5)cc4c23)c1	5.90658	TRUE	<rdkit.Chem.rdchem.Mol object at 0x7facdf6697b0>
CHEMBL2325098	1280	nM	Brc1ccc(C2=NN(c3ccccc3)C(c3ccc4ccccc4c3)C2)cc1	5.89279	TRUE	<rdkit.Chem.rdchem.Mol object at 0x7facdf669820>
CHEMBL5186640	1290	nM	FC(F)(F)c1ccc(/C=C/c2nc(CNc3ccc(Cl)cc3)co2)cc1	5.88941	TRUE	<rdkit.Chem.rdchem.Mol object at 0x7facdf669890>
CHEMBL3906330	1300	nM	O=C(CBr)OCCn1c(=O)oc2cc3ncnc(Nc4ccc(F)c(F)c4)c3cc21	5.88606	TRUE	<rdkit.Chem.rdchem.Mol object at 0x7facdf669900>
CHEMBL3133821	1300	nM	Oc1cccc(Nc2ccnc3[nH]c4ccccc4c23)c1	5.88606	TRUE	<rdkit.Chem.rdchem.Mol object at 0x7facdf669970>
CHEMBL5270336	1320	nM	CN1C(=O)c2ccc(NC(=O)CSc3nc4cc5ccccc5cc4c(=O)n3-c3ccc(S(N)(=O)=O)cc3)cc2C1=O	5.87943	TRUE	<rdkit.Chem.rdchem.Mol object at 0x7facdf6699e0>
CHEMBL4095253	1350	nM	C=CS(=O)(=O)N1CCC[C@@H]1Cn1cc(-c2ccc3c(c2)OCO3)c2c(N)ncnc21	5.86967	TRUE	<rdkit.Chem.rdchem.Mol object at 0x7facdf669ac0>
CHEMBL3827349	1350	nM	c1cnc2ccc(Nc3ncnc4ccc(-c5cnn(C6CCNCC6)c5)cc34)cc2c1	5.86967	TRUE	<rdkit.Chem.rdchem.Mol object at 0x7facdf669b30>
CHEMBL3633933	1390	nM	CCNC(=O)Nc1ccc2ncnc(Nc3ccc(OCc4ccccn4)c(Cl)c3)c2c1	5.85699	TRUE	<rdkit.Chem.rdchem.Mol object at 0x7facdf669ba0>
CHEMBL196548	1400	nM	CCOCc1cn2ncnc(Nc3ccc4c(cnn4Cc4ccccc4)c3)c2c1CC	5.85387	TRUE	<rdkit.Chem.rdchem.Mol object at 0x7facdf669c10>
CHEMBL92731	1428	nM	CCCN(C/C=C/C(=O)Nc1ccc2ncnc(Nc3cccc(Br)c3)c2c1)CCC	5.84527	TRUE	<rdkit.Chem.rdchem.Mol object at 0x7facdf669cf0>
CHEMBL2325099	1450	nM	COc1ccc(C2=NN(c3ccccc3)C(c3ccc4ccccc4c3)C2)cc1	5.83863	TRUE	<rdkit.Chem.rdchem.Mol object at 0x7facdf669d60>
CHEMBL2325097	1460	nM	Clc1ccc(C2=NN(c3ccccc3)C(c3ccc4ccccc4c3)C2)cc1	5.83565	TRUE	<rdkit.Chem.rdchem.Mol object at 0x7facdf669dd0>
CHEMBL2408212	1500	nM	CNC(=O)CN(C)CCOc1cc2c(Nc3cccc(Cl)c3F)ncnc2cc1OC	5.82391	TRUE	<rdkit.Chem.rdchem.Mol object at 0x7facdf669e40>
CHEMBL461113	1530	nM	Nc1ncnc(Nc2ccc(OCc3ccccc3)c(Cl)c2)c1C(=O)OCCN1CCOCC1	5.81531	TRUE	<rdkit.Chem.rdchem.Mol object at 0x7facdf669eb0>
CHEMBL1828862	1530	nM	Cc1ncc([N+](=O)[O-])n1CC(=O)NS(=O)(=O)c1ccc(F)cc1	5.81531	TRUE	<rdkit.Chem.rdchem.Mol object at 0x7facdf669f20>
CHEMBL3647967	1536	nM	C=CC(=O)N[C@H]1CC[C@@H](n2nc(-c3ccc(Oc4ccccc4)cc3)c3c(N)ncnc32)CC1	5.81361	TRUE	<rdkit.Chem.rdchem.Mol object at 0x7facdf669f90>
CHEMBL3357643	1536	nM	COc1cc2ncnc(Nc3ccc(F)c(Cl)c3)c2cc1NC(=O)/C(F)=C/CN1CCOCC1	5.81361	TRUE	<rdkit.Chem.rdchem.Mol object at 0x7facdf66a040>
CHEMBL94068	1559	nM	O=C(/C=C/CN1CCCCC1)Nc1ccc2ncnc(Nc3cccc(Br)c3)c2c1	5.80715	TRUE	<rdkit.Chem.rdchem.Mol object at 0x7facdf66a0b0>
CHEMBL3357639	1574	nM	O=C(Nc1cc2c(Nc3ccc(F)c(Cl)c3)ncnc2cc1O[C@H]1CCOC1)/C(F)=C/CN1CCOCC1	5.803	TRUE	<rdkit.Chem.rdchem.Mol object at 0x7facdf66a120>
CHEMBL361322	1580	nM	c1ccc(Cc2nc3cc(Nc4ncnc5nn6ccccc6c45)ccc3[nH]2)cc1	5.80134	TRUE	<rdkit.Chem.rdchem.Mol object at 0x7facdf66a190>
CHEMBL3940060	1600	nM	O=C(CCl)OCCn1c(=O)oc2cc3ncnc(Nc4ccc(F)c(Cl)c4)c3cc21	5.79588	TRUE	<rdkit.Chem.rdchem.Mol object at 0x7facdf66a200>
CHEMBL462162	1600	nM	COc1cc(Nc2ncnc3[nH]ccc23)ccc1-c1nc2ccccc2s1	5.79588	TRUE	<rdkit.Chem.rdchem.Mol object at 0x7facdf66a270>
CHEMBL281300	1630	nM	C=CC(=O)Nc1ccc2ncc(C#N)c(Nc3cccc(Br)c3)c2c1	5.78781	TRUE	<rdkit.Chem.rdchem.Mol object at 0x7facdf66a2e0>
CHEMBL3133818	1640	nM	CC(=O)c1ccc2[nH]c3nccc(Nc4cccc(N)c4)c3c2c1	5.78516	TRUE	<rdkit.Chem.rdchem.Mol object at 0x7facdf66a350>
CHEMBL954	1669	nM	CCN(CC)CCOc1ccc(/C(=C(/Cl)c2ccccc2)c2ccccc2)cc1	5.77754	TRUE	<rdkit.Chem.rdchem.Mol object at 0x7facdf66a3c0>
CHEMBL488564	1700	nM	COc1cc2nccc(Nc3ccc(N4C(=O)c5ccc(Cl)cc5C4=O)c(C)c3)c2cc1OC	5.76955	TRUE	<rdkit.Chem.rdchem.Mol object at 0x7facdf66a430>
CHEMBL193282	1700	nM	C#CCCCn1c(Sc2cc(OC)c(OC)c(OC)c2Cl)nc2c(N)nc(F)nc21	5.76955	TRUE	<rdkit.Chem.rdchem.Mol object at 0x7facdf66a4a0>
CHEMBL2325110	1750	nM	NC(=S)N1N=C(c2ccc(F)cc2)CC1c1ccc2ccccc2c1	5.75696	TRUE	<rdkit.Chem.rdchem.Mol object at 0x7facdf66a510>
CHEMBL14874	1778	nM	CN(CCCOc1ccc2ncnc(Nc3ccc(OCc4ccccc4)cc3)c2c1)CCS(C)(=O)=O	5.75007	TRUE	<rdkit.Chem.rdchem.Mol object at 0x7facdf66a580>
CHEMBL1683959	1800	nM	Cc1ncnc(Nc2ccc(OCc3cccc(F)c3)c(Cl)c2)c1/C=N/OCCCN1CCOCC1	5.74473	TRUE	<rdkit.Chem.rdchem.Mol object at 0x7facdf66a660>
CHEMBL438075	1820	nM	CC(=O)Nc1ccc(C#Cc2cncnc2Nc2ccc(OCc3cccc(F)c3)c(Cl)c2)cc1	5.73993	TRUE	<rdkit.Chem.rdchem.Mol object at 0x7facdf66a6d0>
CHEMBL5190408	1830	nM	Cc1ccc(NCc2coc(/C=C/c3ccc(C(F)(F)F)cc3)n2)cc1	5.73755	TRUE	<rdkit.Chem.rdchem.Mol object at 0x7facdf66a740>
CHEMBL334255	1878	nM	CCCCCCCCCCCCCCCC[n+]1ccccc1.[Br-]	5.7263	TRUE	<rdkit.Chem.rdchem.Mol object at 0x7facdf66a890>
CHEMBL601040	1880	nM	Cc1ccc(NC(=O)c2ccc(N(CCCl)CCCl)cc2)cc1	5.72584	TRUE	<rdkit.Chem.rdchem.Mol object at 0x7facdf66a900>
CHEMBL2325095	1890	nM	c1ccc(C2=NN(c3ccccc3)C(c3ccc4ccccc4c3)C2)cc1	5.72354	TRUE	<rdkit.Chem.rdchem.Mol object at 0x7facdf66a970>
CHEMBL1079742	1890	nM	C#Cc1cccc(Nc2ncnc3cc(OCCOC)c(OCCOC)cc23)c1.Cl	5.72354	TRUE	<rdkit.Chem.rdchem.Mol object at 0x7facdf66a9e0>
CHEMBL3325473	1900	nM	COC(=O)C1=C(N)N(c2cccnc2)C2=C(C(=O)CCC2)C1c1cc2ccccc2n2nnnc12	5.72125	TRUE	<rdkit.Chem.rdchem.Mol object at 0x7facdf66aa50>
CHEMBL2325093	1910	nM	Cc1ccc(C2=NN(c3ccccc3)C(c3cccc4ccccc34)C2)cc1	5.71897	TRUE	<rdkit.Chem.rdchem.Mol object at 0x7facdf66aac0>
CHEMBL2112370	1912	nM	COC[C@@H]1CCCN1C/C=C/C(=O)Nc1ccc2ncnc(Nc3cccc(Br)c3)c2c1	5.71851	TRUE	<rdkit.Chem.rdchem.Mol object at 0x7facdf66ab30>
CHEMBL5179098	1940	nM	Fc1cccc(-c2ccc3c(ccn3Cc3coc(/C=C/c4ccc(C(F)(F)F)cc4)n3)c2)c1	5.7122	TRUE	<rdkit.Chem.rdchem.Mol object at 0x7facdf66aba0>
CHEMBL323630	1950	nM	CN(C)C/C=C/C(=O)Nc1ccc2ncc(C#N)c(Nc3ccc(F)c(Cl)c3)c2c1	5.70997	TRUE	<rdkit.Chem.rdchem.Mol object at 0x7facdf66ac10>
CHEMBL2325094	1980	nM	Clc1ccc(C2=NN(c3ccccc3)C(c3cccc4ccccc34)C2)cc1Cl	5.70333	TRUE	<rdkit.Chem.rdchem.Mol object at 0x7facdf66ac80>
CHEMBL605161	2000	nM	O=[N+]([O-])c1ccc2c(c1)S(=O)(=O)N=S2c1ccc(Br)cc1	5.69897	TRUE	<rdkit.Chem.rdchem.Mol object at 0x7facdf66acf0>
CHEMBL2325096	2010	nM	Fc1ccc(C2=NN(c3ccccc3)C(c3ccc4ccccc4c3)C2)cc1	5.6968	TRUE	<rdkit.Chem.rdchem.Mol object at 0x7facdf66ad60>
CHEMBL5183608	2010	nM	FC(F)(F)c1ccc(/C=C/c2nc(CNc3cccc(Cl)c3)co2)cc1	5.6968	TRUE	<rdkit.Chem.rdchem.Mol object at 0x7facdf66add0>
CHEMBL3746473	2060	nM	CC(=O)N1N=C(c2ccc([N+](=O)[O-])cc2)CC1c1ccc(C(=O)OCCn2c([N+](=O)[O-])cnc2C)cc1	5.68613	TRUE	<rdkit.Chem.rdchem.Mol object at 0x7facdf66aeb0>
CHEMBL221753	2084	nM	CC(C)(C)CC(C)(C)c1ccc(OCCOCC[N+](C)(C)Cc2ccccc2)cc1.[Cl-]	5.6811	TRUE	<rdkit.Chem.rdchem.Mol object at 0x7facdf66af20>
CHEMBL3325475	2100	nM	COC(=O)C1=C(N)N(c2cccnc2)C2=C(C(=O)CCC2)C1c1cc2cc(OC)ccc2n2nnnc12	5.67778	TRUE	<rdkit.Chem.rdchem.Mol object at 0x7facdf66af90>
CHEMBL116525	2120	nM	CC#CC(=O)Nc1cc2c(Nc3cccc(Br)c3)c(C#N)cnc2cc1OC	5.67366	TRUE	<rdkit.Chem.rdchem.Mol object at 0x7facdf66b040>
CHEMBL290106	2147	nM	Oc1c(Cl)cc(Cl)cc1Sc1cc(Cl)cc(Cl)c1O	5.66817	TRUE	<rdkit.Chem.rdchem.Mol object at 0x7facdf66b0b0>
CHEMBL1173718	2150	nM	Cc1ncc([N+](=O)[O-])n1CCOC(=O)/C=C/c1ccc(-c2ccccc2)cc1	5.66756	TRUE	<rdkit.Chem.rdchem.Mol object at 0x7facdf66b120>
CHEMBL5193804	2170	nM	Fc1ccc(NCc2coc(/C=C/c3ccc(C(F)(F)F)cc3)n2)cc1	5.66354	TRUE	<rdkit.Chem.rdchem.Mol object at 0x7facdf66b190>
CHEMBL5171924	2210	nM	COc1ccccc1-c1ccc2c(ccn2Cc2coc(/C=C/c3ccc(C(F)(F)F)cc3)n2)c1	5.65561	TRUE	<rdkit.Chem.rdchem.Mol object at 0x7facdf66b200>
CHEMBL1958212	2240	nM	Cc1ccc(C2=NN(C3=NC(=O)CS3)C(c3ccccc3)C2)cc1	5.64975	TRUE	<rdkit.Chem.rdchem.Mol object at 0x7facdf66b2e0>
CHEMBL1081849	2240	nM	Cc1c(C(=O)NCCCN2CCN(C)CC2)[nH]c2cnnc(Nc3ccc(OCc4cccc(F)c4)c(Cl)c3)c12	5.64975	TRUE	<rdkit.Chem.rdchem.Mol object at 0x7facdf66b350>
CHEMBL5181577	2250	nM	FC(F)(F)c1ccc(/C=C/c2nc(Cn3ccc4cc(-c5cccc(Cl)c5)ccc43)co2)cc1	5.64782	TRUE	<rdkit.Chem.rdchem.Mol object at 0x7facdf66b3c0>
CHEMBL589589	2320	nM	CC(C)c1ccc(NC(=O)c2ccc(N(CCCl)CCCl)cc2)cc1	5.63451	TRUE	<rdkit.Chem.rdchem.Mol object at 0x7facdf66b4a0>
CHEMBL2325091	2320	nM	Brc1ccc(C2=NN(c3ccccc3)C(c3cccc4ccccc34)C2)cc1	5.63451	TRUE	<rdkit.Chem.rdchem.Mol object at 0x7facdf66b510>
CHEMBL194160	2400	nM	CCc1c(CC(N)=O)cn2ncnc(Nc3ccc4c(cnn4Cc4ccccc4)c3)c12	5.61979	TRUE	<rdkit.Chem.rdchem.Mol object at 0x7facdf66b580>
CHEMBL1928944	2421	nM	O=[N+]([O-])c1cccc(Oc2cc(Nc3ccc(OCc4cccc(F)c4)c(Cl)c3)ncn2)c1	5.61601	TRUE	<rdkit.Chem.rdchem.Mol object at 0x7facdf66b5f0>
CHEMBL591910	2430	nM	O=C1CSC(N/N=C/c2ccc(Br)cc2)=N1	5.61439	TRUE	<rdkit.Chem.rdchem.Mol object at 0x7facdf66b660>
CHEMBL4084996	2500	nM	Clc1ccc(-c2nnc(Cc3nc4ccc(Cl)cc4[nH]3)o2)cc1	5.60206	TRUE	<rdkit.Chem.rdchem.Mol object at 0x7facdf66b6d0>
CHEMBL1958216	2520	nM	Cc1ccc(C2=NN(C3=NC(=O)CS3)C(c3ccc(C)cc3)C2)cc1	5.5986	TRUE	<rdkit.Chem.rdchem.Mol object at 0x7facdf66b740>
CHEMBL589831	2580	nM	O=C(Nc1ccc(Br)cc1)c1ccc(N(CCCl)CCCl)cc1	5.58838	TRUE	<rdkit.Chem.rdchem.Mol object at 0x7facdf66b7b0>
CHEMBL3633938	2720	nM	N#CC(C#N)=CNc1ccc2ncnc(Nc3ccc(OCc4cccc(F)c4)c(Cl)c3)c2c1	5.56543	TRUE	<rdkit.Chem.rdchem.Mol object at 0x7facdf66b890>
CHEMBL3746711	2750	nM	CC(=O)N1N=C(c2ccc(I)cc2)CC1c1ccc(C(=O)OCCn2c([N+](=O)[O-])cnc2C)cc1	5.56067	TRUE	<rdkit.Chem.rdchem.Mol object at 0x7facdf66b900>
CHEMBL589823	2750	nM	O=C1CSC(N/N=C/c2ccc(Cl)cc2)=N1	5.56067	TRUE	<rdkit.Chem.rdchem.Mol object at 0x7facdf66b970>
CHEMBL1958221	2750	nM	COc1ccc(C2=NN(C3=NC(=O)CS3)C(c3ccc(Br)cc3)C2)cc1	5.56067	TRUE	<rdkit.Chem.rdchem.Mol object at 0x7facdf66b9e0>
CHEMBL1173814	2770	nM	COc1ccc(C2CC(c3ccc(C)c(C)c3)=NN2C(N)=S)cc1	5.55752	TRUE	<rdkit.Chem.rdchem.Mol object at 0x7facdf66ba50>
CHEMBL316127	2776	nM	O=C(/C=C/CN1CCOCC1)Nc1ccc2ncnc(Nc3cccc(Br)c3)c2c1	5.55658	TRUE	<rdkit.Chem.rdchem.Mol object at 0x7facdf66bac0>
CHEMBL5186298	2790	nM	FC(F)(F)c1ccc(/C=C/c2nc(CNc3ccccc3Cl)co2)cc1	5.5544	TRUE	<rdkit.Chem.rdchem.Mol object at 0x7facdf66bb30>
CHEMBL196018	2800	nM	CCOC(=O)c1cn2ncnc(Nc3ccc(F)c(Cl)c3)c2c1CC	5.55284	TRUE	<rdkit.Chem.rdchem.Mol object at 0x7facdf66bba0>
CHEMBL93537	2808	nM	O=C(/C=C/CN1CCSCC1)Nc1ccc2ncnc(Nc3cccc(Br)c3)c2c1	5.5516	TRUE	<rdkit.Chem.rdchem.Mol object at 0x7facdf66bc10>
CHEMBL3218001	2900	nM	C#Cc1cccc(Nc2ncnc3ccc(S(=O)(=O)n4ccc(/C=C/C(=O)Nc5ccccc5N)c4)cc23)c1	5.5376	TRUE	<rdkit.Chem.rdchem.Mol object at 0x7facdf66bc80>
CHEMBL1683956	2900	nM	CCc1ncnc(Nc2ccc(OCc3cccc(F)c3)c(Cl)c2)c1C	5.5376	TRUE	<rdkit.Chem.rdchem.Mol object at 0x7facdf66bcf0>
CHEMBL2112369	2921	nM	COC[C@@H]1CCCN1C/C=C\C(=O)Nc1ccc2ncnc(Nc3cccc(Br)c3)c2c1	5.53447	TRUE	<rdkit.Chem.rdchem.Mol object at 0x7facdf66bd60>
CHEMBL83	2949	nM	CC/C(=C(\c1ccccc1)c1ccc(OCCN(C)C)cc1)c1ccccc1	5.53033	TRUE	<rdkit.Chem.rdchem.Mol object at 0x7facdf66bdd0>
CHEMBL114728	2970	nM	CCOc1cc2ncc(C#N)c(Nc3cccc(Br)c3)c2cc1NC(=O)/C=C/CN(C)C	5.52724	TRUE	<rdkit.Chem.rdchem.Mol object at 0x7facdf66be40>
CHEMBL370934	3000	nM	CCOC(=O)c1cn2ncnc(Nc3cccc(Br)c3)c2c1CC	5.52288	TRUE	<rdkit.Chem.rdchem.Mol object at 0x7facdf66beb0>
CHEMBL2205026	3000	nM	N#Cc1ccc2c(c1)S(=O)(=O)N=S2c1ccc(Br)cc1	5.52288	TRUE	<rdkit.Chem.rdchem.Mol object at 0x7facdf66bf20>
CHEMBL2325092	3010	nM	COc1ccc(C2=NN(c3ccccc3)C(c3cccc4ccccc34)C2)cc1	5.52143	TRUE	<rdkit.Chem.rdchem.Mol object at 0x7facdf66c040>
CHEMBL245967	3030	nM	CCNCc1cncc(/C=C/c2c[nH]nc2-c2nc3ccc(OC)cc3[nH]2)c1	5.51856	TRUE	<rdkit.Chem.rdchem.Mol object at 0x7facdf66c0b0>
CHEMBL1958022	3050	nM	O=C1CSC(N2N=C(c3ccccc3)CC2c2ccc(Br)cc2)=N1	5.5157	TRUE	<rdkit.Chem.rdchem.Mol object at 0x7facdf66c120>
CHEMBL2325090	3070	nM	Clc1ccc(C2=NN(c3ccccc3)C(c3cccc4ccccc34)C2)cc1	5.51286	TRUE	<rdkit.Chem.rdchem.Mol object at 0x7facdf66c190>
CHEMBL5174515	3070	nM	COc1ccccc1NCc1coc(/C=C/c2ccc(C(F)(F)F)cc2)n1	5.51286	TRUE	<rdkit.Chem.rdchem.Mol object at 0x7facdf66c200>
CHEMBL518803	3100	nM	c1ccc2sc(-c3ccc(Nc4ncnc5[nH]ccc45)cc3)nc2c1	5.50864	TRUE	<rdkit.Chem.rdchem.Mol object at 0x7facdf66c270>
CHEMBL1958214	3110	nM	Cc1ccc(C2=NN(C3=NC(=O)CS3)C(c3ccc(Cl)cc3)C2)cc1	5.50724	TRUE	<rdkit.Chem.rdchem.Mol object at 0x7facdf66c2e0>
CHEMBL3902295	3200	nM	O=C(CCl)OCCn1c(=O)oc2cc3ncnc(Nc4ccc(F)c(F)c4)c3cc21	5.49485	TRUE	<rdkit.Chem.rdchem.Mol object at 0x7facdf66c350>
CHEMBL5193926	3250	nM	COc1cccc(-c2ccc3c(ccn3Cc3coc(/C=C/c4ccc(C(F)(F)F)cc4)n3)c2)c1	5.48812	TRUE	<rdkit.Chem.rdchem.Mol object at 0x7facdf66c3c0>
CHEMBL2324872	3280	nM	COc1ccc(C2=NN(C(N)=S)C(c3ccc4ccccc4c3)C2)cc1	5.48413	TRUE	<rdkit.Chem.rdchem.Mol object at 0x7facdf66c430>
CHEMBL372112	3300	nM	CCOC(=O)c1cn2ncnc(Nc3ccc4[nH]ncc4c3)c2c1CC	5.48149	TRUE	<rdkit.Chem.rdchem.Mol object at 0x7facdf66c4a0>
CHEMBL496	3318.8	nM	Oc1c(Cl)cc(Cl)c(Cl)c1Cc1c(O)c(Cl)cc(Cl)c1Cl	5.47902	TRUE	<rdkit.Chem.rdchem.Mol object at 0x7facdf66c510>
CHEMBL589830	3330	nM	O=C(Nc1ccc(Cl)cc1)c1ccc(N(CCCl)CCCl)cc1	5.47756	TRUE	<rdkit.Chem.rdchem.Mol object at 0x7facdf66c580>
CHEMBL258940	3400	nM	CN1CCC(Nc2ncc3ncnc(Nc4ccc(F)c(Cl)c4)c3n2)CC1	5.46852	TRUE	<rdkit.Chem.rdchem.Mol object at 0x7facdf66c5f0>
CHEMBL3218002	3400	nM	C#Cc1cccc(Nc2ncnc3ccc(S(=O)(=O)n4ccc(/C=C/C(=O)NO)c4)cc23)c1	5.46852	TRUE	<rdkit.Chem.rdchem.Mol object at 0x7facdf66c660>
CHEMBL1828863	3410	nM	Cc1ncc([N+](=O)[O-])n1CC(=O)NS(=O)(=O)c1ccc(Cl)cc1	5.46725	TRUE	<rdkit.Chem.rdchem.Mol object at 0x7facdf66c6d0>
CHEMBL3746212	3450	nM	CC(=O)N1N=C(c2ccc(Br)cc2)CC1c1ccc(C(=O)OCCn2c([N+](=O)[O-])cnc2C)cc1	5.46218	TRUE	<rdkit.Chem.rdchem.Mol object at 0x7facdf66c740>
CHEMBL1173783	3460	nM	Cc1ncc([N+](=O)[O-])n1CCOC(=O)/C=C/c1ccc(OCc2ccccc2)cc1	5.46092	TRUE	<rdkit.Chem.rdchem.Mol object at 0x7facdf66c820>
CHEMBL382125	3500	nM	CCCCn1c(Sc2cc(OC)ccc2OC)nc2c(N)ncnc21	5.45593	TRUE	<rdkit.Chem.rdchem.Mol object at 0x7facdf66c890>
CHEMBL3746642	3530	nM	CC(=O)N1N=C(c2ccc([N+](=O)[O-])cc2)CC1c1ccc(C(=O)OC(C)Cn2c([N+](=O)[O-])cnc2C)cc1	5.45223	TRUE	<rdkit.Chem.rdchem.Mol object at 0x7facdf66c900>
CHEMBL1958213	3530	nM	Cc1ccc(C2=NN(C3=NC(=O)CS3)C(c3ccc(F)cc3)C2)cc1	5.45223	TRUE	<rdkit.Chem.rdchem.Mol object at 0x7facdf66c970>
CHEMBL5180538	3580	nM	FC(F)(F)c1ccc(/C=C/c2nc(Cn3ccc4cc(-c5ccc(Cl)cc5)ccc43)co2)cc1	5.44612	TRUE	<rdkit.Chem.rdchem.Mol object at 0x7facdf66ca50>
CHEMBL1828864	3590	nM	Cc1ncc([N+](=O)[O-])n1CC(=O)NS(=O)(=O)c1ccc(Br)cc1	5.44491	TRUE	<rdkit.Chem.rdchem.Mol object at 0x7facdf66cac0>
CHEMBL2325089	3590	nM	Fc1ccc(C2=NN(c3ccccc3)C(c3cccc4ccccc34)C2)cc1	5.44491	TRUE	<rdkit.Chem.rdchem.Mol object at 0x7facdf66cb30>
CHEMBL248712	3600	nM	CCNCc1cncc(-c2cnc3[nH]nc(-c4nc5cc(F)c(F)cc5[nH]4)c3c2)c1	5.4437	TRUE	<rdkit.Chem.rdchem.Mol object at 0x7facdf66cc10>
CHEMBL1958209	3650	nM	O=C1CSC(N2N=C(c3ccc(Br)cc3)CC2c2ccc(Br)cc2)=N1	5.43771	TRUE	<rdkit.Chem.rdchem.Mol object at 0x7facdf66cc80>
CHEMBL65376	3800	nM	O=C(CCCC(=O)Oc1ccc(/C=C/[N+](=O)[O-])cc1)OCc1ccco1	5.42022	TRUE	<rdkit.Chem.rdchem.Mol object at 0x7facdf66cd60>
CHEMBL205870	3800	nM	C#Cc1cncnc1Nc1ccc(OCc2cccc(F)c2)c(Cl)c1	5.42022	TRUE	<rdkit.Chem.rdchem.Mol object at 0x7facdf66cdd0>
CHEMBL400906	3820	nM	CNCc1cncc(-c2cnc3[nH]nc(-c4nc5cc(OC(F)(F)F)ccc5[nH]4)c3c2)c1	5.41794	TRUE	<rdkit.Chem.rdchem.Mol object at 0x7facdf66ce40>
CHEMBL2325088	3830	nM	c1ccc(C2=NN(c3ccccc3)C(c3cccc4ccccc34)C2)cc1	5.4168	TRUE	<rdkit.Chem.rdchem.Mol object at 0x7facdf66ceb0>
CHEMBL1958034	3840	nM	O=C1CSC(N2N=C(c3ccc(Cl)cc3)CC2c2ccc(Br)cc2)=N1	5.41567	TRUE	<rdkit.Chem.rdchem.Mol object at 0x7facdf66cf20>
CHEMBL283682	3870	nM	CC#CC(=O)Nc1ccc2ncc(C#N)c(Nc3cccc(Br)c3)c2c1	5.41229	TRUE	<rdkit.Chem.rdchem.Mol object at 0x7facdf66cf90>
CHEMBL2324870	3870	nM	NC(=S)N1N=C(c2ccc(Cl)cc2)CC1c1ccc2ccccc2c1	5.41229	TRUE	<rdkit.Chem.rdchem.Mol object at 0x7facdf66d040>
CHEMBL589822	3890	nM	O=C1CSC(N/N=C/c2ccc(F)cc2)=N1	5.41005	TRUE	<rdkit.Chem.rdchem.Mol object at 0x7facdf66d0b0>
CHEMBL592711	3890	nM	O=C(Nc1ccc(F)cc1)c1ccc(N(CCCl)CCCl)cc1	5.41005	TRUE	<rdkit.Chem.rdchem.Mol object at 0x7facdf66d120>
CHEMBL3981210	3900	nM	COc1ccc(COc2ccc(Nc3ncnc4cc5oc(=O)n(CCOC(=O)CBr)c5cc34)cc2)cc1	5.40894	TRUE	<rdkit.Chem.rdchem.Mol object at 0x7facdf66d190>
CHEMBL3747281	4070	nM	CC(=O)N1N=C(c2ccc(F)cc2)CC1c1ccc(C(=O)OCCn2c([N+](=O)[O-])cnc2C)cc1	5.39041	TRUE	<rdkit.Chem.rdchem.Mol object at 0x7facdf66d200>
CHEMBL3747277	4100	nM	CC(=O)N1N=C(c2ccc(Cl)cc2)CC1c1ccc(C(=O)OCCn2c([N+](=O)[O-])cnc2C)cc1	5.38722	TRUE	<rdkit.Chem.rdchem.Mol object at 0x7facdf66d270>
CHEMBL3325478	4100	nM	CCOC(=O)C1=C(N)N(c2cccnc2)C2=C(C(=O)CCC2)C1c1cc2cc(C)ccc2n2nnnc12	5.38722	TRUE	<rdkit.Chem.rdchem.Mol object at 0x7facdf66d2e0>
CHEMBL1958218	4120	nM	COc1ccc(C2=NN(C3=NC(=O)CS3)C(c3ccccc3)C2)cc1	5.3851	TRUE	<rdkit.Chem.rdchem.Mol object at 0x7facdf66d350>
CHEMBL255866	4123	nM	CO/N=C/c1c(N)ncnc1Nc1ccc2[nH]ncc2c1	5.38479	TRUE	<rdkit.Chem.rdchem.Mol object at 0x7facdf66d3c0>
CHEMBL30973	4160	nM	CN(C)C/C=C/C(=O)Nc1ccc2ncc(C#N)c(Nc3cccc(Br)c3)c2c1	5.38091	TRUE	<rdkit.Chem.rdchem.Mol object at 0x7facdf66d430>
CHEMBL429478	4170	nM	CCNCc1cncc(-c2cnc3[nH]nc(-c4nc5cc(OC)ccc5[nH]4)c3c2)c1	5.37986	TRUE	<rdkit.Chem.rdchem.Mol object at 0x7facdf66d4a0>
CHEMBL2325106	4180	nM	COc1ccc(C2=NN(C(N)=S)C(c3cccc4ccccc34)C2)cc1	5.37882	TRUE	<rdkit.Chem.rdchem.Mol object at 0x7facdf66d510>
CHEMBL94123	4182	nM	O=C(/C=C/N1CCOCC1)Nc1ccc2ncnc(Nc3cccc(Br)c3)c2c1	5.37862	TRUE	<rdkit.Chem.rdchem.Mol object at 0x7facdf66d580>
CHEMBL1828860	4210	nM	Cc1ncc([N+](=O)[O-])n1CC(=O)NS(=O)(=O)c1ccccc1	5.37572	TRUE	<rdkit.Chem.rdchem.Mol object at 0x7facdf66d5f0>
CHEMBL5189379	4346	nM	CN1CCN(C(C)(C)/C=C(\C#N)C(=O)N2CCC[C@@H](n3nc(-c4ccc(Oc5ccccc5)cc4F)c4c(N)ncnc43)C2)CC1	5.36191	TRUE	<rdkit.Chem.rdchem.Mol object at 0x7facdf66d660>
CHEMBL114392	4390	nM	C=C(CN1CCOCC1)C(=O)Nc1ccc2ncc(C#N)c(Nc3ccc(F)c(Cl)c3)c2c1	5.35754	TRUE	<rdkit.Chem.rdchem.Mol object at 0x7facdf66d6d0>
CHEMBL304442	4400	nM	O=C(CCCC(=O)Oc1ccc(/C=C/[N+](=O)[O-])cc1)Oc1ccccc1	5.35655	TRUE	<rdkit.Chem.rdchem.Mol object at 0x7facdf66d740>
CHEMBL114490	4490	nM	COc1cc2ncc(C#N)c(Nc3ccc(F)c(Cl)c3)c2cc1NC(=O)/C=C/CN(C)C	5.34775	TRUE	<rdkit.Chem.rdchem.Mol object at 0x7facdf66d7b0>
CHEMBL326811	4500	nM	C/C=C/C(=O)Nc1ccc2ncc(C#N)c(Nc3cccc(Br)c3)c2c1	5.34679	TRUE	<rdkit.Chem.rdchem.Mol object at 0x7facdf66d820>
CHEMBL1958023	4640	nM	Cc1ccc(C2CC(c3ccccc3)=NN2C2=NC(=O)CS2)cc1	5.33348	TRUE	<rdkit.Chem.rdchem.Mol object at 0x7facdf66d900>
CHEMBL1173651	4650	nM	Cc1ncc([N+](=O)[O-])n1CCOC(=O)/C=C/c1ccc(Br)cc1	5.33255	TRUE	<rdkit.Chem.rdchem.Mol object at 0x7facdf66d970>
CHEMBL324718	4680	nM	C=CC(=O)Nc1cc2c(Nc3cccc(Br)c3)c(C#N)cnc2cc1OC	5.32975	TRUE	<rdkit.Chem.rdchem.Mol object at 0x7facdf66d9e0>
CHEMBL4079125	4700	nM	Clc1ccc(-c2nnc(Cc3nc4ccccc4[nH]3)o2)c(Cl)c1	5.3279	TRUE	<rdkit.Chem.rdchem.Mol object at 0x7facdf66da50>
CHEMBL3891774	4700	nM	O=C(Nc1ccc(Nc2ncnc3cc4oc(=O)n(CCOC(=O)CBr)c4cc23)cc1)NC1CCCCC1	5.3279	TRUE	<rdkit.Chem.rdchem.Mol object at 0x7facdf66dac0>
CHEMBL1828861	4760	nM	Cc1ccc(S(=O)(=O)NC(=O)Cn2c([N+](=O)[O-])cnc2C)cc1	5.32239	TRUE	<rdkit.Chem.rdchem.Mol object at 0x7facdf66db30>
CHEMBL1172803	4770	nM	Cc1ncc([N+](=O)[O-])n1CCOC(=O)/C=C/c1ccc(Cl)cc1	5.32148	TRUE	<rdkit.Chem.rdchem.Mol object at 0x7facdf66dba0>
CHEMBL2070198	4800	nM	Brc1cccc(Nc2ncnc3ccc(NCc4ccc5c(c4)OCCCO5)cc23)c1	5.31876	TRUE	<rdkit.Chem.rdchem.Mol object at 0x7facdf66dc10>
CHEMBL1958021	4830	nM	O=C1CSC(N2N=C(c3ccccc3)CC2c2ccc(Cl)cc2)=N1	5.31605	TRUE	<rdkit.Chem.rdchem.Mol object at 0x7facdf66dc80>
CHEMBL1958037	4870	nM	O=C1CSC(N2N=C(c3ccc(Br)cc3)CC2c2ccccc2)=N1	5.31247	TRUE	<rdkit.Chem.rdchem.Mol object at 0x7facdf66dcf0>
CHEMBL425578	5000	nM	CCCCn1c(Cc2cc(OC)ccc2I)nc2c(N)ncnc21	5.30103	TRUE	<rdkit.Chem.rdchem.Mol object at 0x7facdf66ddd0>
CHEMBL370808	5000	nM	COc1ccc(C#CC(C)(C)N)cc1-c1[nH]nc2nc(Nc3ccc(F)cc3F)ncc12	5.30103	TRUE	<rdkit.Chem.rdchem.Mol object at 0x7facdf66de40>
CHEMBL1170278	5030	nM	Cc1ncc([N+](=O)[O-])n1CCOC(=O)/C=C/c1cccc2ccccc12	5.29843	TRUE	<rdkit.Chem.rdchem.Mol object at 0x7facdf66deb0>
CHEMBL92902	5042	nM	CN1CCC=C(C(=O)Nc2ccc3ncnc(Nc4cccc(Br)c4)c3c2)C1	5.2974	TRUE	<rdkit.Chem.rdchem.Mol object at 0x7facdf66df20>
CHEMBL1958019	5120	nM	O=C1CSC(N2N=C(c3ccccc3)CC2c2ccccc2)=N1	5.29073	TRUE	<rdkit.Chem.rdchem.Mol object at 0x7facdf66df90>
CHEMBL248713	5120	nM	CCNCc1cncc(-c2cnc3[nH]nc(-c4nc5cc(F)ccc5[nH]4)c3c2)c1	5.29073	TRUE	<rdkit.Chem.rdchem.Mol object at 0x7facdf66e040>
CHEMBL3327179	5200	nM	N#CC1=C(N)N(c2cccnc2)C2=C(C(=O)CCC2)C1c1cc2ccccc2n2nnnc12	5.284	TRUE	<rdkit.Chem.rdchem.Mol object at 0x7facdf66e120>
CHEMBL364623	5200	nM	Cc1cc(Nc2ncc(C(=O)Nc3c(C)cccc3Cl)s2)nc(C)n1	5.284	TRUE	<rdkit.Chem.rdchem.Mol object at 0x7facdf66e190>
CHEMBL3325474	5200	nM	COC(=O)C1=C(N)N(c2cccnc2)C2=C(C(=O)CCC2)C1c1cc2cc(C)ccc2n2nnnc12	5.284	TRUE	<rdkit.Chem.rdchem.Mol object at 0x7facdf66e200>
CHEMBL255291	5220	nM	CO/N=C/c1c(N)ncnc1NCc1ccc(F)c(Cl)c1	5.28233	TRUE	<rdkit.Chem.rdchem.Mol object at 0x7facdf66e270>
CHEMBL5183407	5260	nM	Fc1ccc(-c2ccc3c(ccn3Cc3coc(/C=C/c4ccc(C(F)(F)F)cc4)n3)c2)cc1	5.27901	TRUE	<rdkit.Chem.rdchem.Mol object at 0x7facdf66e2e0>
CHEMBL195218	5300	nM	CONC(=O)c1cc(Nc2ncnn3cc(NC(=O)OCCCS(C)(=O)=O)c(C(C)C)c23)c(F)cc1F	5.27572	TRUE	<rdkit.Chem.rdchem.Mol object at 0x7facdf66e350>
CHEMBL518983	5300	nM	CONC(=O)c1ccc(F)c(Nc2ncnn3cc(NC(=O)OCCCS(C)(=O)=O)c(C(C)C)c23)c1	5.27572	TRUE	<rdkit.Chem.rdchem.Mol object at 0x7facdf66e3c0>
CHEMBL5206700	5300	nM	FC(F)(F)c1ccc(/C=C/c2nc(CNc3ccccc3)co2)cc1	5.27572	TRUE	<rdkit.Chem.rdchem.Mol object at 0x7facdf66e430>
CHEMBL1683971	5380	nM	Cc1ncnc(Nc2ccc(OCc3cccc(F)c3)c(Cl)c2)c1C#CCN1CCOCC1	5.26922	TRUE	<rdkit.Chem.rdchem.Mol object at 0x7facdf66e4a0>
CHEMBL5286730	5400	nM	Cc1ccc(NC(=O)CSc2nc3cc4ccccc4cc3c(=O)n2-c2ccc(S(N)(=O)=O)cc2)cc1C	5.26761	TRUE	<rdkit.Chem.rdchem.Mol object at 0x7facdf66e510>
CHEMBL29197	5400	nM	COc1cc2ncnc(Nc3cccc(Br)c3)c2cc1OC	5.26761	TRUE	<rdkit.Chem.rdchem.Mol object at 0x7facdf66e580>
CHEMBL2325104	5460	nM	NC(=S)N1N=C(c2ccc(Cl)cc2)CC1c1cccc2ccccc12	5.26281	TRUE	<rdkit.Chem.rdchem.Mol object at 0x7facdf66e5f0>
CHEMBL263788	5660	nM	COc1cc2ncc(C#N)c(Nc3cccc(Br)c3)c2cc1NC(=O)/C=C/CN(C)C	5.24718	TRUE	<rdkit.Chem.rdchem.Mol object at 0x7facdf66e660>
CHEMBL2325109	5690	nM	NC(=S)N1N=C(c2ccccc2)CC1c1ccc2ccccc2c1	5.24489	TRUE	<rdkit.Chem.rdchem.Mol object at 0x7facdf66e6d0>
CHEMBL472544	5700	nM	Nc1ncnc(Nc2ccc(OCc3ccccc3)c(Cl)c2)c1C(=O)NNC(=O)CCN1CCOCC1	5.24413	TRUE	<rdkit.Chem.rdchem.Mol object at 0x7facdf66e7b0>
CHEMBL5202630	5790	nM	Fc1ccccc1NCc1coc(/C=C/c2ccc(C(F)(F)F)cc2)n1	5.23732	TRUE	<rdkit.Chem.rdchem.Mol object at 0x7facdf66e820>
CHEMBL592707	5830	nM	Cc1ccc(/C=N/NC2=NC(=O)CS2)cc1	5.23433	TRUE	<rdkit.Chem.rdchem.Mol object at 0x7facdf66e890>
CHEMBL1172802	5840	nM	Cc1ncc([N+](=O)[O-])n1CCOC(=O)/C=C/c1ccc(F)cc1	5.23359	TRUE	<rdkit.Chem.rdchem.Mol object at 0x7facdf66e900>
CHEMBL1958039	5870	nM	O=C1CSC(N2N=C(c3ccc(Br)cc3)CC2c2ccc(Cl)cc2)=N1	5.23136	TRUE	<rdkit.Chem.rdchem.Mol object at 0x7facdf66e970>
CHEMBL1016	5947.2	nM	CCOc1nc2cccc(C(=O)O)c2n1Cc1ccc(-c2ccccc2-c2nnn[nH]2)cc1	5.22569	TRUE	<rdkit.Chem.rdchem.Mol object at 0x7facdf66e9e0>
CHEMBL24944	5970	nM	O=C(Nc1ccc(Br)cc1)c1cc(Br)cc(Br)c1O	5.22403	TRUE	<rdkit.Chem.rdchem.Mol object at 0x7facdf66ea50>
CHEMBL459729	6000	nM	Cc1cc(C2CCN(CCCF)CC2)cc2[nH]c(-c3c(NCCn4cc(Cl)cn4)cc[nH]c3=O)nc12	5.22185	TRUE	<rdkit.Chem.rdchem.Mol object at 0x7facdf66eac0>
CHEMBL1093235	6000	nM	O=[N+]([O-])c1cccc(-c2nc3sccn3c2-c2ccnc(Nc3ccccc3)n2)c1	5.22185	TRUE	<rdkit.Chem.rdchem.Mol object at 0x7facdf66eb30>
CHEMBL1365395	6029	nM	Cc1ccc2c(C)nc(Nc3nc(O)cc(CSc4nnnn4-c4ccccc4)n3)nc2c1	5.21975	TRUE	<rdkit.Chem.rdchem.Mol object at 0x7facdf66eba0>
CHEMBL3917657	6200	nM	CC(C)(C)c1ccc(Nc2ncnc3cc4oc(=O)n(CCOC(=O)CBr)c4cc23)cc1	5.20761	TRUE	<rdkit.Chem.rdchem.Mol object at 0x7facdf66ec10>
CHEMBL1958024	6210	nM	COc1ccc(C2CC(c3ccccc3)=NN2C2=NC(=O)CS2)cc1	5.20691	TRUE	<rdkit.Chem.rdchem.Mol object at 0x7facdf66ec80>
CHEMBL1958217	6230	nM	COc1ccc(C2CC(c3ccc(C)cc3)=NN2C2=NC(=O)CS2)cc1	5.20551	TRUE	<rdkit.Chem.rdchem.Mol object at 0x7facdf66ecf0>
CHEMBL1958028	6240	nM	O=C1CSC(N2N=C(c3ccc(F)cc3)CC2c2ccc(Br)cc2)=N1	5.20482	TRUE	<rdkit.Chem.rdchem.Mol object at 0x7facdf66ed60>
CHEMBL1683950	6300	nM	Fc1cccc(COc2ccc(Nc3cc(-c4ccccc4)ncn3)cc2Cl)c1	5.20066	TRUE	<rdkit.Chem.rdchem.Mol object at 0x7facdf66edd0>
CHEMBL1958020	6350	nM	O=C1CSC(N2N=C(c3ccccc3)CC2c2ccc(F)cc2)=N1	5.19723	TRUE	<rdkit.Chem.rdchem.Mol object at 0x7facdf66ee40>
CHEMBL4094471	6500	nM	Clc1ccccc1-c1nnc(Cc2nc3ccccc3[nH]2)o1	5.18709	TRUE	<rdkit.Chem.rdchem.Mol object at 0x7facdf66ef90>
CHEMBL1683949	6500	nM	Cc1cc(Nc2ccc(OCc3cccc(F)c3)c(Cl)c2)ncn1	5.18709	TRUE	<rdkit.Chem.rdchem.Mol object at 0x7facdf66f040>
CHEMBL2070191	6500	nM	Clc1cccc(Nc2ncnc3ccc(NCc4ccc5c(c4)OCO5)cc23)c1	5.18709	TRUE	<rdkit.Chem.rdchem.Mol object at 0x7facdf66f0b0>
CHEMBL249304	6510	nM	CN1CCN(c2ccc3[nH]c(-c4n[nH]c5ncc(-c6cncc7ccccc67)cc45)nc3c2)CC1	5.18642	TRUE	<rdkit.Chem.rdchem.Mol object at 0x7facdf66f120>
CHEMBL3133831	6530	nM	CCOc1cccc(Nc2ccnc3[nH]c4ccc(S(=O)(=O)N5CCN(CCO)CC5)cc4c23)c1	5.18509	TRUE	<rdkit.Chem.rdchem.Mol object at 0x7facdf66f190>
CHEMBL1173667	6580	nM	NC(=S)N1N=C(c2ccc(Cl)c(Cl)c2)CC1c1ccc(O)cc1	5.18177	TRUE	<rdkit.Chem.rdchem.Mol object at 0x7facdf66f200>
CHEMBL63559	6600	nM	COc1ccc(OC(=O)CCCC(=O)Oc2ccc(/C=C/[N+](=O)[O-])cc2)cc1	5.18046	TRUE	<rdkit.Chem.rdchem.Mol object at 0x7facdf66f270>
CHEMBL428206	6600	nM	N#Cc1n[nH]nc1-c1ccc(Oc2ccccc2)cc1	5.18046	TRUE	<rdkit.Chem.rdchem.Mol object at 0x7facdf66f2e0>
CHEMBL2325107	6680	nM	Cc1ccc(C2=NN(C(N)=S)C(c3cccc4ccccc34)C2)cc1	5.17522	TRUE	<rdkit.Chem.rdchem.Mol object at 0x7facdf66f350>
CHEMBL2325108	6840	nM	NC(=S)N1N=C(c2ccc(Cl)c(Cl)c2)CC1c1cccc2ccccc12	5.16494	TRUE	<rdkit.Chem.rdchem.Mol object at 0x7facdf66f3c0>
CHEMBL85021	7000	nM	CC(C)c1cc(/C=C2\C(=O)Nc3ccccc32)cc(C(C)C)c1O	5.1549	TRUE	<rdkit.Chem.rdchem.Mol object at 0x7facdf66f4a0>
CHEMBL1828867	7020	nM	O=C(Cc1ccc(F)cc1)NS(=O)(=O)c1ccc(F)cc1	5.15366	TRUE	<rdkit.Chem.rdchem.Mol object at 0x7facdf66f510>
CHEMBL1958210	7040	nM	Cc1ccc(C2CC(c3ccc(Br)cc3)=NN2C2=NC(=O)CS2)cc1	5.15243	TRUE	<rdkit.Chem.rdchem.Mol object at 0x7facdf66f580>
CHEMBL1958031	7050	nM	O=C1CSC(N2N=C(c3ccc(Cl)cc3)CC2c2ccccc2)=N1	5.15181	TRUE	<rdkit.Chem.rdchem.Mol object at 0x7facdf66f5f0>
CHEMBL371863	7200	nM	CCOC(=O)c1cn2ncnc(NCc3ccccc3)c2c1CC	5.14267	TRUE	<rdkit.Chem.rdchem.Mol object at 0x7facdf66f6d0>
CHEMBL2325102	7240	nM	NC(=S)N1N=C(c2ccccc2)CC1c1cccc2ccccc12	5.14026	TRUE	<rdkit.Chem.rdchem.Mol object at 0x7facdf66f740>
CHEMBL1958222	7350	nM	COc1ccc(C2=NN(C3=NC(=O)CS3)C(c3ccc(C)cc3)C2)cc1	5.13371	TRUE	<rdkit.Chem.rdchem.Mol object at 0x7facdf66f7b0>
CHEMBL3809172	7400	nM	O=C1N=C(C(=O)c2c[nH]c3ccccc23)N/C1=C\c1c[nH]c2cc(O)ccc12	5.13077	TRUE	<rdkit.Chem.rdchem.Mol object at 0x7facdf66f820>
CHEMBL4869634	7491	nM	CC(C)Oc1cc(F)ccc1Nc1ncnc2ccc(-c3ccc(C(=O)N4CCNCC4)cc3)nc12	5.12546	TRUE	<rdkit.Chem.rdchem.Mol object at 0x7facdf66f890>
CHEMBL1828868	7560	nM	O=C(Cc1ccc(F)cc1)NS(=O)(=O)c1ccc(Cl)cc1	5.12148	TRUE	<rdkit.Chem.rdchem.Mol object at 0x7facdf66f900>
CHEMBL5180660	7590	nM	FC(F)(F)c1ccc(/C=C/c2nc(Cn3ccc4cc(-c5ccccc5)ccc43)co2)cc1	5.11976	TRUE	<rdkit.Chem.rdchem.Mol object at 0x7facdf66f970>
CHEMBL1958220	7590	nM	COc1ccc(C2=NN(C3=NC(=O)CS3)C(c3ccc(Cl)cc3)C2)cc1	5.11976	TRUE	<rdkit.Chem.rdchem.Mol object at 0x7facdf66f9e0>
CHEMBL489083	7700	nM	N=C(N)SCCCn1c(=O)c2c(c1=O)n1c3ccccc3cc1c1cccc3ccn2c31	5.11351	TRUE	<rdkit.Chem.rdchem.Mol object at 0x7facdf66fa50>
CHEMBL424252	7800	nM	CCN(CC)C/C=C/C(=O)Nc1cc2c(Nc3ccc(F)c(Cl)c3)c(C#N)cnc2cc1OC	5.10791	TRUE	<rdkit.Chem.rdchem.Mol object at 0x7facdf66fac0>
CHEMBL238828	7900	nM	N#Cc1n[nH]nc1-c1ccc(Br)cc1	5.10237	TRUE	<rdkit.Chem.rdchem.Mol object at 0x7facdf66fb30>
CHEMBL201772	8000	nM	CCCCn1c(Cc2cc(OC)ccc2Br)nc2c(N)ncnc21	5.09691	TRUE	<rdkit.Chem.rdchem.Mol object at 0x7facdf66fba0>
CHEMBL3633939	8000	nM	N#CC(C#N)=CNc1ccc2ncnc(Nc3ccc(OCc4ccccn4)c(Cl)c3)c2c1	5.09691	TRUE	<rdkit.Chem.rdchem.Mol object at 0x7facdf66fc10>
CHEMBL365318	8000	nM	CONC(=O)c1cc(Nc2ncnn3cc(-c4nnc(C)o4)c(C(C)C)c23)c(F)cc1F	5.09691	TRUE	<rdkit.Chem.rdchem.Mol object at 0x7facdf66fc80>
CHEMBL1958219	8040	nM	COc1ccc(C2=NN(C3=NC(=O)CS3)C(c3ccc(F)cc3)C2)cc1	5.09474	TRUE	<rdkit.Chem.rdchem.Mol object at 0x7facdf66fcf0>
CHEMBL1958035	8130	nM	Cc1ccc(C2CC(c3ccc(Cl)cc3)=NN2C2=NC(=O)CS2)cc1	5.08991	TRUE	<rdkit.Chem.rdchem.Mol object at 0x7facdf66fd60>
CHEMBL1958038	8140	nM	O=C1CSC(N2N=C(c3ccc(Br)cc3)CC2c2ccc(F)cc2)=N1	5.08938	TRUE	<rdkit.Chem.rdchem.Mol object at 0x7facdf66fdd0>
CHEMBL1828869	8180	nM	O=C(Cc1ccc(F)cc1)NS(=O)(=O)c1ccc(Br)cc1	5.08725	TRUE	<rdkit.Chem.rdchem.Mol object at 0x7facdf66fe40>
CHEMBL89723	8200	nM	CC(C)c1cc(/C=C2\C(=O)Nc3ccc(Cl)cc32)cc(C(C)C)c1O	5.08619	TRUE	<rdkit.Chem.rdchem.Mol object at 0x7facdf66feb0>
CHEMBL3747776	8270	nM	CC(=O)N1N=C(c2ccc(Br)cc2)CC1c1ccc(C(=O)OC(C)Cn2c([N+](=O)[O-])cnc2C)cc1	5.08249	TRUE	<rdkit.Chem.rdchem.Mol object at 0x7facdf66ff20>
CHEMBL1828865	8410	nM	O=C(Cc1ccc(F)cc1)NS(=O)(=O)c1ccccc1	5.0752	TRUE	<rdkit.Chem.rdchem.Mol object at 0x7facdf66ff90>
CHEMBL604671	8460	nM	O=C1CSC(N/N=C/c2ccc([N+](=O)[O-])cc2)=N1	5.07263	TRUE	<rdkit.Chem.rdchem.Mol object at 0x7facdf670040>
CHEMBL3747152	8540	nM	CC(=O)N1N=C(c2ccc(F)cc2)CC1c1ccc(C(=O)OC(C)Cn2c([N+](=O)[O-])cnc2C)cc1	5.06854	TRUE	<rdkit.Chem.rdchem.Mol object at 0x7facdf6700b0>
CHEMBL86754	8577	nM	Oc1c(I)cc(I)c2cccnc12	5.06666	TRUE	<rdkit.Chem.rdchem.Mol object at 0x7facdf670120>
CHEMBL5182590	8630	nM	Fc1cccc(NCc2coc(/C=C/c3ccc(C(F)(F)F)cc3)n2)c1	5.06399	TRUE	<rdkit.Chem.rdchem.Mol object at 0x7facdf670190>
CHEMBL5270270	8730	nM	COc1cc2ncnc(NCCOc3ccccc3F)c2cc1OC	5.05899	TRUE	<rdkit.Chem.rdchem.Mol object at 0x7facdf670200>
CHEMBL118000	8740	nM	N#Cc1cnc2ccc(NC(=O)/C=C/CN3CCOCC3)cc2c1Nc1ccc(F)c(Cl)c1	5.05849	TRUE	<rdkit.Chem.rdchem.Mol object at 0x7facdf670270>
CHEMBL4066118	8800	nM	c1ccc2c(Cc3nnc(Cc4nc5ccccc5[nH]4)o3)cccc2c1	5.05552	TRUE	<rdkit.Chem.rdchem.Mol object at 0x7facdf6702e0>
CHEMBL3133815	8830	nM	O=[N+]([O-])c1cccc(Nc2ccnc3[nH]c4ccc(Br)cc4c23)c1	5.05404	TRUE	<rdkit.Chem.rdchem.Mol object at 0x7facdf670350>
CHEMBL92882	8832	nM	COC/C=C/C(=O)Nc1ccc2ncnc(Nc3cccc(Br)c3)c2c1	5.05394	TRUE	<rdkit.Chem.rdchem.Mol object at 0x7facdf6703c0>
CHEMBL3325471	8900	nM	COc1ccc2c(c1)cc(C1C(C#N)=C(N)N(c3cccnc3)C3=C1C(=O)CCC3)c1nnnn12	5.05061	TRUE	<rdkit.Chem.rdchem.Mol object at 0x7facdf670430>
CHEMBL3325476	9000	nM	COC(=O)C1=C(N)N(c2cccnc2)C2=C(C(=O)CCC2)C1c1cc2cc(Cl)ccc2n2nnnc12	5.04576	TRUE	<rdkit.Chem.rdchem.Mol object at 0x7facdf6704a0>
CHEMBL2325105	9150	nM	NC(=S)N1N=C(c2ccc(Br)cc2)CC1c1cccc2ccccc12	5.03858	TRUE	<rdkit.Chem.rdchem.Mol object at 0x7facdf670510>
CHEMBL592708	9170	nM	COc1ccc(/C=N/NC2=NC(=O)CS2)cc1	5.03763	TRUE	<rdkit.Chem.rdchem.Mol object at 0x7facdf670580>
CHEMBL1170459	9240	nM	Cc1ncc([N+](=O)[O-])n1CCOC(=O)/C=C/c1ccc2ccccc2c1	5.03433	TRUE	<rdkit.Chem.rdchem.Mol object at 0x7facdf6705f0>
CHEMBL1958211	9270	nM	COc1ccc(C2CC(c3ccc(Br)cc3)=NN2C2=NC(=O)CS2)cc1	5.03292	TRUE	<rdkit.Chem.rdchem.Mol object at 0x7facdf670660>
CHEMBL394465	9300	nM	CN1CCN(c2ccc3nc(-c4n[nH]cc4/C=C/c4cccnc4)[nH]c3c2)CC1	5.03152	TRUE	<rdkit.Chem.rdchem.Mol object at 0x7facdf6706d0>
CHEMBL116857	9350	nM	COc1cc(NC(=O)/C=C/CN(C)C)cc2c(Nc3cccc(Br)c3)c(C#N)cnc12	5.02919	TRUE	<rdkit.Chem.rdchem.Mol object at 0x7facdf670740>
CHEMBL461140	9500	nM	CN(C)CCOc1ccc(/C=C/c2cc(-c3cc4c(=O)[nH]cnc4[nH]3)ccn2)cc1	5.02228	TRUE	<rdkit.Chem.rdchem.Mol object at 0x7facdf670820>
CHEMBL325156	9580	nM	CCN(CC)C(C)/C=C/C(=O)Nc1cc2c(Nc3ccc(F)c(Cl)c3)c(C#N)cnc2cc1OC	5.01863	TRUE	<rdkit.Chem.rdchem.Mol object at 0x7facdf670890>
CHEMBL1173653	9650	nM	Cc1ccc(/C=C/C(=O)OCCn2c([N+](=O)[O-])cnc2C)cc1	5.01547	TRUE	<rdkit.Chem.rdchem.Mol object at 0x7facdf670970>
CHEMBL369967	9700	nM	CCNCc1cn2ncnc(Nc3ccc4c(cnn4Cc4ccccc4)c3)c2c1CC	5.01323	TRUE	<rdkit.Chem.rdchem.Mol object at 0x7facdf6709e0>
CHEMBL604672	9950	nM	O=C(Nc1ccccc1Br)c1ccc(N(CCCl)CCCl)cc1	5.00218	TRUE	<rdkit.Chem.rdchem.Mol object at 0x7facdf670a50>
CHEMBL3746168	9960	nM	CC(=O)N1N=C(c2ccc(Cl)cc2)CC1c1ccc(C(=O)OC(C)Cn2c([N+](=O)[O-])cnc2C)cc1	5.00174	TRUE	<rdkit.Chem.rdchem.Mol object at 0x7facdf670ac0>
CHEMBL1958033	9960	nM	O=C1CSC(N2N=C(c3ccc(Cl)cc3)CC2c2ccc(Cl)cc2)=N1	5.00174	TRUE	<rdkit.Chem.rdchem.Mol object at 0x7facdf670b30>
CHEMBL1173714	9970	nM	Cc1ncc([N+](=O)[O-])n1CCOC(=O)/C=C/c1ccc(C(C)C)cc1	5.0013	TRUE	<rdkit.Chem.rdchem.Mol object at 0x7facdf670ba0>
CHEMBL1172957	10000	nM	NS(=O)(=O)c1ccc(Nc2nc(N3CCOCC3)nc3[nH]cnc23)cc1	5	TRUE	<rdkit.Chem.rdchem.Mol object at 0x7facdf670c10>
CHEMBL462343	10000	nM	Nc1ncnc(Nc2ccc(OCc3ccccc3)c(Cl)c2)c1C(=O)NCCN1CCCCC1	5	TRUE	<rdkit.Chem.rdchem.Mol object at 0x7facdf670c80>
CHEMBL518646	10000	nM	Nc1ncnc(Nc2ccc(OCc3ccccc3)c(Cl)c2)c1C(=O)NCCN1CCOCC1	5	TRUE	<rdkit.Chem.rdchem.Mol object at 0x7facdf670cf0>
CHEMBL3884319	10000	nM	CC1(C)C(=O)N([C@H]2CCc3c(O)cccc32)c2nc(Nc3ccccc3)ncc21	5	TRUE	<rdkit.Chem.rdchem.Mol object at 0x7facdf670dd0>
CHEMBL5169997	10230	nM	FC(F)(F)c1ccc(/C=C/c2nc(Cn3ccc4cc(-c5ccccc5Cl)ccc43)co2)cc1	4.99012	TRUE	<rdkit.Chem.rdchem.Mol object at 0x7facdf670e40>
CHEMBL1958029	10260	nM	Cc1ccc(C2CC(c3ccc(F)cc3)=NN2C2=NC(=O)CS2)cc1	4.98885	TRUE	<rdkit.Chem.rdchem.Mol object at 0x7facdf670eb0>
CHEMBL590524	10260	nM	O=C1CSC(N/N=C/c2cccc(Br)c2)=N1	4.98885	TRUE	<rdkit.Chem.rdchem.Mol object at 0x7facdf670f20>
CHEMBL1958036	10340	nM	COc1ccc(C2CC(c3ccc(Cl)cc3)=NN2C2=NC(=O)CS2)cc1	4.98548	TRUE	<rdkit.Chem.rdchem.Mol object at 0x7facdf670f90>
CHEMBL1958223	10480	nM	COc1ccc(C2=NN(C3=NC(=O)CS3)C(c3ccc(OC)cc3)C2)cc1	4.97964	TRUE	<rdkit.Chem.rdchem.Mol object at 0x7facdf671040>
CHEMBL1828866	10530	nM	Cc1ccc(S(=O)(=O)NC(=O)Cc2ccc(F)cc2)cc1	4.97757	TRUE	<rdkit.Chem.rdchem.Mol object at 0x7facdf6710b0>
CHEMBL1958025	10530	nM	O=C1CSC(N2N=C(c3ccc(F)cc3)CC2c2ccccc2)=N1	4.97757	TRUE	<rdkit.Chem.rdchem.Mol object at 0x7facdf671120>
CHEMBL2325103	10630	nM	NC(=S)N1N=C(c2ccc(F)cc2)CC1c1cccc2ccccc12	4.97347	TRUE	<rdkit.Chem.rdchem.Mol object at 0x7facdf671190>
CHEMBL1173652	10780	nM	Cc1ncc([N+](=O)[O-])n1CCOC(=O)/C=C/c1ccccc1	4.96738	TRUE	<rdkit.Chem.rdchem.Mol object at 0x7facdf671200>
CHEMBL393014	11000	nM	N#Cc1n[nH]nc1-c1ccc(Cl)cc1	4.95861	TRUE	<rdkit.Chem.rdchem.Mol object at 0x7facdf6712e0>
CHEMBL1828872	11050	nM	O=C(Cc1ccc(Cl)cc1)NS(=O)(=O)c1ccc(F)cc1	4.95664	TRUE	<rdkit.Chem.rdchem.Mol object at 0x7facdf671350>
CHEMBL113901	11820	nM	COc1cc2ncc(C#N)c(Nc3ccc(F)c(Cl)c3)c2cc1NC(=O)/C=C/C(C)N(C)C	4.92738	TRUE	<rdkit.Chem.rdchem.Mol object at 0x7facdf6714a0>
CHEMBL245770	12000	nM	COc1cncc(/C=C/c2c[nH]nc2-c2nc3ccc(OC)cc3[nH]2)c1	4.92082	TRUE	<rdkit.Chem.rdchem.Mol object at 0x7facdf671510>
CHEMBL113194	12000	nM	CCCCn1c(Cc2cc(OC)ccc2OC)nc2c(N)ncnc21	4.92082	TRUE	<rdkit.Chem.rdchem.Mol object at 0x7facdf671580>
CHEMBL3746387	12050	nM	COc1ccc(C2=NN(C(C)=O)C(c3ccc(C(=O)OC(C)Cn4c([N+](=O)[O-])cnc4C)cc3)C2)cc1	4.91901	TRUE	<rdkit.Chem.rdchem.Mol object at 0x7facdf671660>
CHEMBL5192580	12140	nM	Fc1ccccc1-c1ccc2c(ccn2Cc2coc(/C=C/c3ccc(C(F)(F)F)cc3)n2)c1	4.91578	TRUE	<rdkit.Chem.rdchem.Mol object at 0x7facdf6716d0>
CHEMBL3393072	12370	nM	O=C(Cc1c[nH]c2ccccc12)NNC(=S)Nc1ncccc1Br	4.90763	TRUE	<rdkit.Chem.rdchem.Mol object at 0x7facdf671740>
CHEMBL1958030	12430	nM	COc1ccc(C2CC(c3ccc(F)cc3)=NN2C2=NC(=O)CS2)cc1	4.90553	TRUE	<rdkit.Chem.rdchem.Mol object at 0x7facdf6717b0>
CHEMBL3746564	12660	nM	CC(=O)N1N=C(c2ccc(I)cc2)CC1c1ccc(C(=O)OC(C)Cn2c([N+](=O)[O-])cnc2C)cc1	4.89757	TRUE	<rdkit.Chem.rdchem.Mol object at 0x7facdf671820>
CHEMBL592710	12870	nM	O=C(Nc1ccccc1Cl)c1ccc(N(CCCl)CCCl)cc1	4.89042	TRUE	<rdkit.Chem.rdchem.Mol object at 0x7facdf671890>
CHEMBL1828870	13070	nM	O=C(Cc1ccc(Cl)cc1)NS(=O)(=O)c1ccccc1	4.88372	TRUE	<rdkit.Chem.rdchem.Mol object at 0x7facdf671900>
CHEMBL296419	13084	nM	COc1ccc(CCN2CCC(Nc3nc4ccccc4n3Cc3ccc(F)cc3)CC2)cc1	4.88326	TRUE	<rdkit.Chem.rdchem.Mol object at 0x7facdf671970>
CHEMBL3746268	13160	nM	CC(=O)N1N=C(c2ccc(C)cc2)CC1c1ccc(C(=O)OCCn2c([N+](=O)[O-])cnc2C)cc1	4.88074	TRUE	<rdkit.Chem.rdchem.Mol object at 0x7facdf6719e0>
CHEMBL1958027	13160	nM	O=C1CSC(N2N=C(c3ccc(F)cc3)CC2c2ccc(Cl)cc2)=N1	4.88074	TRUE	<rdkit.Chem.rdchem.Mol object at 0x7facdf671a50>
CHEMBL86945	13200	nM	COc1ccc(/C=C2\C(=O)Nc3ccccc32)cc1C(C)(C)C	4.87943	TRUE	<rdkit.Chem.rdchem.Mol object at 0x7facdf671ac0>
CHEMBL605957	13316	nM	COc1cc(C2=C(c3c[nH]c4ccc(Br)cc34)C(=O)NC2=O)cc(OC)c1OC	4.87563	TRUE	<rdkit.Chem.rdchem.Mol object at 0x7facdf671b30>
CHEMBL1828873	13320	nM	O=C(Cc1ccc(Cl)cc1)NS(=O)(=O)c1ccc(Cl)cc1	4.8755	TRUE	<rdkit.Chem.rdchem.Mol object at 0x7facdf671ba0>
CHEMBL5183228	13340	nM	Cc1ccccc1-c1ccc2c(ccn2Cc2coc(/C=C/c3ccc(C(F)(F)F)cc3)n2)c1	4.87484	TRUE	<rdkit.Chem.rdchem.Mol object at 0x7facdf671c10>
CHEMBL239895	13500	nM	CC(C)c1ccc(-c2n[nH]nc2C#N)cc1	4.86967	TRUE	<rdkit.Chem.rdchem.Mol object at 0x7facdf671cf0>
CHEMBL1828874	13560	nM	O=C(Cc1ccc(Cl)cc1)NS(=O)(=O)c1ccc(Br)cc1	4.86774	TRUE	<rdkit.Chem.rdchem.Mol object at 0x7facdf671d60>
CHEMBL808	13904	nM	Clc1ccc(COC(Cn2ccnc2)c2ccc(Cl)cc2Cl)cc1	4.85686	TRUE	<rdkit.Chem.rdchem.Mol object at 0x7facdf671e40>
CHEMBL3747079	14040	nM	CC(=O)N1N=C(c2ccccc2)CC1c1ccc(C(=O)OCCn2c([N+](=O)[O-])cnc2C)cc1	4.85263	TRUE	<rdkit.Chem.rdchem.Mol object at 0x7facdf671eb0>
CHEMBL1173713	14320	nM	COc1ccc(/C=C/C(=O)OCCn2c([N+](=O)[O-])cnc2C)cc1	4.84406	TRUE	<rdkit.Chem.rdchem.Mol object at 0x7facdf671f20>
CHEMBL592139	14340	nM	O=C1CSC(N/N=C/c2cccc(Cl)c2)=N1	4.84345	TRUE	<rdkit.Chem.rdchem.Mol object at 0x7facdf671f90>
CHEMBL3325470	14800	nM	Cc1ccc2c(c1)cc(C1C(C#N)=C(N)N(c3cccnc3)C3=C1C(=O)CCC3)c1nnnn12	4.82974	TRUE	<rdkit.Chem.rdchem.Mol object at 0x7facdf672040>
CHEMBL3747407	14930	nM	CCOc1ccc(C2=NN(C(C)=O)C(c3ccc(C(=O)OCCn4c([N+](=O)[O-])cnc4C)cc3)C2)cc1	4.82594	TRUE	<rdkit.Chem.rdchem.Mol object at 0x7facdf6720b0>
CHEMBL597492	15180	nM	COc1cc(C2=C(c3c[nH]c4ccc(I)cc34)C(=O)NC2=O)cc(OC)c1OC	4.81873	TRUE	<rdkit.Chem.rdchem.Mol object at 0x7facdf672120>
CHEMBL86944	15200	nM	COc1c(Br)cc(/C=C2\C(=O)Nc3ccc(Cl)cc32)cc1C(C)(C)C	4.81816	TRUE	<rdkit.Chem.rdchem.Mol object at 0x7facdf672190>
CHEMBL92086	15238	nM	C=C(C)C(=O)Nc1ccc2ncnc(Nc3cccc(Br)c3)c2c1	4.81707	TRUE	<rdkit.Chem.rdchem.Mol object at 0x7facdf672200>
CHEMBL589825	15390	nM	O=C(Nc1ccccc1F)c1ccc(N(CCCl)CCCl)cc1	4.81276	TRUE	<rdkit.Chem.rdchem.Mol object at 0x7facdf672270>
CHEMBL1828871	15570	nM	Cc1ccc(S(=O)(=O)NC(=O)Cc2ccc(Cl)cc2)cc1	4.80771	TRUE	<rdkit.Chem.rdchem.Mol object at 0x7facdf6722e0>
CHEMBL93754	15624	nM	O=C(/C=C/Cn1cccn1)Nc1ccc2ncnc(Nc3cccc(Br)c3)c2c1	4.80621	TRUE	<rdkit.Chem.rdchem.Mol object at 0x7facdf672350>
CHEMBL428690	15800	nM	CN1CC[C@H](c2c(O)cc(O)c3c(=O)cc(-c4ccccc4Cl)oc23)[C@H](O)C1	4.80134	TRUE	<rdkit.Chem.rdchem.Mol object at 0x7facdf672430>
CHEMBL86326	16200	nM	COc1ccc(/C=C2\C(=O)Nc3ccc(Cl)cc32)cc1C(C)(C)C	4.79048	TRUE	<rdkit.Chem.rdchem.Mol object at 0x7facdf672580>
CHEMBL1828877	16260	nM	O=C(Cc1ccc(Br)cc1)NS(=O)(=O)c1ccc(F)cc1	4.78888	TRUE	<rdkit.Chem.rdchem.Mol object at 0x7facdf6725f0>
CHEMBL1958032	16420	nM	O=C1CSC(N2N=C(c3ccc(Cl)cc3)CC2c2ccc(F)cc2)=N1	4.78463	TRUE	<rdkit.Chem.rdchem.Mol object at 0x7facdf672660>
CHEMBL393015	16600	nM	N#Cc1n[nH]nc1-c1ccc(Oc2ccccc2)c(F)c1	4.77989	TRUE	<rdkit.Chem.rdchem.Mol object at 0x7facdf6726d0>
CHEMBL1172951	16750	nM	Cc1ncc([N+](=O)[O-])n1CCOC(=O)/C=C/c1cccc(F)c1	4.77599	TRUE	<rdkit.Chem.rdchem.Mol object at 0x7facdf672740>
CHEMBL48760	16900	nM	CC(C)c1ccc(/C=C2/C(=O)Nc3ccccc32)cc1	4.77211	TRUE	<rdkit.Chem.rdchem.Mol object at 0x7facdf6727b0>
CHEMBL3747570	17000	nM	CC(=O)N1N=C(c2ccccc2)CC1c1ccc(C(=O)OC(C)Cn2c([N+](=O)[O-])cnc2C)cc1	4.76955	TRUE	<rdkit.Chem.rdchem.Mol object at 0x7facdf672820>
CHEMBL401930	17100	nM	Cc1cc(N2CCOCC2)cc2[nH]c(-c3c(NC[C@@H](O)c4cccc(Cl)c4)cc[nH]c3=O)nc12	4.767	TRUE	<rdkit.Chem.rdchem.Mol object at 0x7facdf672900>
CHEMBL3747055	17250	nM	COc1ccc(C2=NN(C(C)=O)C(c3ccc(C(=O)OCCn4c([N+](=O)[O-])cnc4C)cc3)C2)cc1	4.76321	TRUE	<rdkit.Chem.rdchem.Mol object at 0x7facdf672970>
CHEMBL3745929	18120	nM	CCOc1ccc(C2=NN(C(C)=O)C(c3ccc(C(=O)OC(C)Cn4c([N+](=O)[O-])cnc4C)cc3)C2)cc1	4.74184	TRUE	<rdkit.Chem.rdchem.Mol object at 0x7facdf672b30>
CHEMBL1958026	18120	nM	O=C1CSC(N2N=C(c3ccc(F)cc3)CC2c2ccc(F)cc2)=N1	4.74184	TRUE	<rdkit.Chem.rdchem.Mol object at 0x7facdf672ba0>
CHEMBL4539558	18460	nM	N=C1NC(=O)/C(=C2/CCNC(=O)c3[nH]cc(Br)c32)N1	4.73377	TRUE	<rdkit.Chem.rdchem.Mol object at 0x7facdf672c80>
CHEMBL1173014	18820	nM	COc1cccc(/C=C/C(=O)OCCn2c([N+](=O)[O-])cnc2C)c1	4.72538	TRUE	<rdkit.Chem.rdchem.Mol object at 0x7facdf672cf0>
CHEMBL3746980	18890	nM	CC(=O)N1N=C(c2ccc(C)cc2)CC1c1ccc(C(=O)OC(C)Cn2c([N+](=O)[O-])cnc2C)cc1	4.72377	TRUE	<rdkit.Chem.rdchem.Mol object at 0x7facdf672d60>
CHEMBL10	18896	nM	C[S+]([O-])c1ccc(-c2nc(-c3ccc(F)cc3)c(-c3ccncc3)[nH]2)cc1	4.72363	TRUE	<rdkit.Chem.rdchem.Mol object at 0x7facdf672dd0>
CHEMBL1828878	18940	nM	O=C(Cc1ccc(Br)cc1)NS(=O)(=O)c1ccc(Cl)cc1	4.72262	TRUE	<rdkit.Chem.rdchem.Mol object at 0x7facdf672e40>
CHEMBL87746	19000	nM	COc1c(Br)cc(/C=C2\C(=O)Nc3ccccc32)cc1C(C)(C)C	4.72125	TRUE	<rdkit.Chem.rdchem.Mol object at 0x7facdf672eb0>
CHEMBL1828875	19050	nM	O=C(Cc1ccc(Br)cc1)NS(=O)(=O)c1ccccc1	4.72011	TRUE	<rdkit.Chem.rdchem.Mol object at 0x7facdf672f20>
CHEMBL3325472	19300	nM	N#CC1=C(N)N(c2cccnc2)C2=C(C(=O)CCC2)C1c1cc2cc(Cl)ccc2n2nnnc12	4.71444	TRUE	<rdkit.Chem.rdchem.Mol object at 0x7facdf672f90>
CHEMBL1172950	19340	nM	Cc1ncc([N+](=O)[O-])n1CCOC(=O)/C=C/c1cccc([N+](=O)[O-])c1	4.71354	TRUE	<rdkit.Chem.rdchem.Mol object at 0x7facdf673040>
CHEMBL71	19366	nM	CN(C)CCCN1c2ccccc2Sc2ccc(Cl)cc21	4.71296	TRUE	<rdkit.Chem.rdchem.Mol object at 0x7facdf6730b0>
CHEMBL726	19570	nM	OCCN1CCN(CCCN2c3ccccc3Sc3ccc(C(F)(F)F)cc32)CC1	4.70841	TRUE	<rdkit.Chem.rdchem.Mol object at 0x7facdf673120>
CHEMBL1828879	19830	nM	O=C(Cc1ccc(Br)cc1)NS(=O)(=O)c1ccc(Br)cc1	4.70268	TRUE	<rdkit.Chem.rdchem.Mol object at 0x7facdf673190>
CHEMBL199865	20000	nM	CCCCn1c(Cc2cc(OC)ccc2Cl)nc2c(N)ncnc21	4.69897	TRUE	<rdkit.Chem.rdchem.Mol object at 0x7facdf673200>
CHEMBL1828876	20330	nM	Cc1ccc(S(=O)(=O)NC(=O)Cc2ccc(Br)cc2)cc1	4.69186	TRUE	<rdkit.Chem.rdchem.Mol object at 0x7facdf673270>
CHEMBL1829273	20450	nM	O=C(Cc1cccc(Br)c1)NS(=O)(=O)c1ccc(F)cc1	4.68931	TRUE	<rdkit.Chem.rdchem.Mol object at 0x7facdf6732e0>
CHEMBL4531006	20990	nM	N=C1NC(=O)/C(=C2/CCNC(=O)c3[nH]c(Br)c(Br)c32)N1	4.67799	TRUE	<rdkit.Chem.rdchem.Mol object at 0x7facdf673350>
CHEMBL205652	21000	nM	Fc1cccc(COc2ccc(Nc3ccncn3)cc2Cl)c1	4.67778	TRUE	<rdkit.Chem.rdchem.Mol object at 0x7facdf6733c0>
CHEMBL71884	21000	nM	Cc1cc2nc(CBr)c(-c3ccccc3)nc2cc1C	4.67778	TRUE	<rdkit.Chem.rdchem.Mol object at 0x7facdf673430>
CHEMBL113902	21510	nM	C/C=C/C(=O)Nc1cc2c(Nc3ccc(F)c(Cl)c3)c(C#N)cnc2cc1OCC	4.66736	TRUE	<rdkit.Chem.rdchem.Mol object at 0x7facdf6734a0>
CHEMBL329642	21657	nM	C/C=C\C(=O)Nc1ccc2ncnc(Nc3cccc(Br)c3)c2c1	4.6644	TRUE	<rdkit.Chem.rdchem.Mol object at 0x7facdf673510>
CHEMBL590877	21750	nM	O=C1CSC(N/N=C/c2cccc(F)c2)=N1	4.66254	TRUE	<rdkit.Chem.rdchem.Mol object at 0x7facdf673580>
CHEMBL314021	22500	nM	CN1C(=O)/C(=C\c2ccc(Br)cc2)c2ccccc21	4.64782	TRUE	<rdkit.Chem.rdchem.Mol object at 0x7facdf6735f0>
CHEMBL3325480	22700	nM	CCOC(=O)C1=C(N)N(c2cccnc2)C2=C(C(=O)CCC2)C1c1cc2cc(Cl)ccc2n2nnnc12	4.64397	TRUE	<rdkit.Chem.rdchem.Mol object at 0x7facdf673660>
CHEMBL589120	22750	nM	CN(C(=O)c1ccc(N(CCCl)CCCl)cc1)c1ccccc1	4.64302	TRUE	<rdkit.Chem.rdchem.Mol object at 0x7facdf6736d0>
CHEMBL1828882	23450	nM	COc1ccc(CC(=O)NS(=O)(=O)c2ccc(F)cc2)cc1	4.62986	TRUE	<rdkit.Chem.rdchem.Mol object at 0x7facdf6737b0>
CHEMBL1829274	23460	nM	O=C(Cc1cccc(Br)c1)NS(=O)(=O)c1ccc(Cl)cc1	4.62967	TRUE	<rdkit.Chem.rdchem.Mol object at 0x7facdf673820>
CHEMBL113985	23590	nM	COc1cc(NC(=O)/C=C/CN2CCOCC2)cc2c(Nc3cccc(Br)c3)c(C#N)cnc12	4.62727	TRUE	<rdkit.Chem.rdchem.Mol object at 0x7facdf673890>
CHEMBL4446681	24000	nM	CN(CCc1ccc(-c2ccccc2)cc1)Cc1cn(C)c2ccc(C(=O)Nc3ccc(F)cc3)cc12	4.61979	TRUE	<rdkit.Chem.rdchem.Mol object at 0x7facdf673900>
CHEMBL488646	25000	nM	COc1cc(C2=C(c3cn(COC(C)(C)C)c4ccccc34)CNC2=O)cc(OC)c1OC	4.60206	TRUE	<rdkit.Chem.rdchem.Mol object at 0x7facdf673970>
CHEMBL1828884	25030	nM	COc1ccc(CC(=O)NS(=O)(=O)c2ccc(Br)cc2)cc1	4.60154	TRUE	<rdkit.Chem.rdchem.Mol object at 0x7facdf6739e0>
CHEMBL91748	25710	nM	CN(C)/C=C/C(=O)Nc1ccc2ncnc(Nc3cccc(Br)c3)c2c1	4.5899	TRUE	<rdkit.Chem.rdchem.Mol object at 0x7facdf673a50>
CHEMBL589847	25870	nM	O=C(NCc1ccccc1)c1ccc(N(CCCl)CCCl)cc1	4.5872	TRUE	<rdkit.Chem.rdchem.Mol object at 0x7facdf673ac0>
CHEMBL1829271	26330	nM	O=C(Cc1cccc(Br)c1)NS(=O)(=O)c1ccccc1	4.57955	TRUE	<rdkit.Chem.rdchem.Mol object at 0x7facdf673b30>
CHEMBL589832	27190	nM	O=C(Nc1ccc([N+](=O)[O-])cc1)c1ccc(N(CCCl)CCCl)cc1	4.56559	TRUE	<rdkit.Chem.rdchem.Mol object at 0x7facdf673ba0>
CHEMBL1829275	27380	nM	O=C(Cc1cccc(Br)c1)NS(=O)(=O)c1ccc(Br)cc1	4.56257	TRUE	<rdkit.Chem.rdchem.Mol object at 0x7facdf673c10>
CHEMBL91	27430	nM	Clc1ccc(COC(Cn2ccnc2)c2ccc(Cl)cc2Cl)c(Cl)c1	4.56177	TRUE	<rdkit.Chem.rdchem.Mol object at 0x7facdf673c80>
CHEMBL591051	27830	nM	O=C1CSC(N/N=C/c2cccc(O)c2)=N1	4.55549	TRUE	<rdkit.Chem.rdchem.Mol object at 0x7facdf673cf0>
CHEMBL1829272	27890	nM	Cc1ccc(S(=O)(=O)NC(=O)Cc2cccc(Br)c2)cc1	4.55455	TRUE	<rdkit.Chem.rdchem.Mol object at 0x7facdf673d60>
CHEMBL1828880	29070	nM	COc1ccc(CC(=O)NS(=O)(=O)c2ccccc2)cc1	4.53655	TRUE	<rdkit.Chem.rdchem.Mol object at 0x7facdf673e40>
CHEMBL590083	30060	nM	CCCCNC(=O)c1ccc(N(CCCl)CCCl)cc1	4.52201	TRUE	<rdkit.Chem.rdchem.Mol object at 0x7facdf673eb0>
CHEMBL592240	31000	nM	O=C1CSC(NN=C2CCCCCCC2)=N1	4.50864	TRUE	<rdkit.Chem.rdchem.Mol object at 0x7facdf673f90>
CHEMBL209511	31000	nM	O=S(=O)(Nc1ccc(Cl)cc1O)c1ccccc1	4.50864	TRUE	<rdkit.Chem.rdchem.Mol object at 0x7facdf674040>
CHEMBL113996	31430	nM	COc1cc2ncc(C#N)c(Nc3ccc(F)c(Cl)c3)c2cc1NC(=O)/C=C/CN1CCOCC1	4.50266	TRUE	<rdkit.Chem.rdchem.Mol object at 0x7facdf6740b0>
CHEMBL238617	31600	nM	N#Cc1n[nH]nc1-c1ccc(F)cc1	4.50031	TRUE	<rdkit.Chem.rdchem.Mol object at 0x7facdf674120>
CHEMBL590568	31780	nM	Cc1cccc(/C=N/NC2=NC(=O)CS2)c1	4.49785	TRUE	<rdkit.Chem.rdchem.Mol object at 0x7facdf674190>
CHEMBL246167	32730	nM	FC(F)(F)c1c[nH]c(-c2n[nH]cc2/C=C/c2cncc3ccccc23)n1	4.48505	TRUE	<rdkit.Chem.rdchem.Mol object at 0x7facdf674270>
CHEMBL116012	33950	nM	CCOc1cc2ncc(C#N)c(Nc3cccc(Br)c3)c2cc1NC(=O)/C=C/CN1CCOCC1	4.46916	TRUE	<rdkit.Chem.rdchem.Mol object at 0x7facdf6742e0>
CHEMBL114073	33950	nM	COc1cc2ncc(C#N)c(Nc3ccc(F)c(Cl)c3)c2cc1NC(=O)/C=C/C(C)N1CCOCC1	4.46916	TRUE	<rdkit.Chem.rdchem.Mol object at 0x7facdf674350>
CHEMBL332497	34130	nM	COc1cc2ncc(C#N)c(Nc3cccc(Br)c3)c2cc1NC(=O)/C=C/CN1CCOCC1	4.46686	TRUE	<rdkit.Chem.rdchem.Mol object at 0x7facdf674430>
CHEMBL5172914	34720	nM	Cc1ccc(-c2ccc3c(ccn3Cc3coc(/C=C/c4ccc(C(F)(F)F)cc4)n3)c2)cc1	4.45942	TRUE	<rdkit.Chem.rdchem.Mol object at 0x7facdf6744a0>
CHEMBL453336	36000	nM	COc1cc(C2=C(c3cn(COCc4ccccc4)c4ccccc34)CNC2=O)cc(OC)c1OC	4.4437	TRUE	<rdkit.Chem.rdchem.Mol object at 0x7facdf6745f0>
CHEMBL1683952	36000	nM	Fc1cccc(COc2ccc(Nc3cc(-c4ccsc4)ncn3)cc2Cl)c1	4.4437	TRUE	<rdkit.Chem.rdchem.Mol object at 0x7facdf674660>
CHEMBL1172878	36450	nM	Cc1ncc([N+](=O)[O-])n1CCOC(=O)/C=C/c1ccccc1Cl	4.4383	TRUE	<rdkit.Chem.rdchem.Mol object at 0x7facdf6746d0>
CHEMBL240093	36500	nM	Cc1ccc(-c2n[nH]nc2C#N)cc1	4.43771	TRUE	<rdkit.Chem.rdchem.Mol object at 0x7facdf674740>
CHEMBL4095623	36900	nM	c1ccc(Cc2nnc(Cc3nc4ccccc4[nH]3)o2)cc1	4.43297	TRUE	<rdkit.Chem.rdchem.Mol object at 0x7facdf6747b0>
CHEMBL245966	37000	nM	CCNC(=O)c1cncc(/C=C/c2c[nH]nc2-c2nc3ccc(OC)cc3[nH]2)c1	4.4318	TRUE	<rdkit.Chem.rdchem.Mol object at 0x7facdf674820>
CHEMBL488811	37000	nM	COc1cc(C2=C(c3cn(COc4ccccc4)c4ccccc34)CNC2=O)cc(OC)c1OC	4.4318	TRUE	<rdkit.Chem.rdchem.Mol object at 0x7facdf674900>
CHEMBL591050	37640	nM	O=C1CSC(N/N=C/c2cccc([N+](=O)[O-])c2)=N1	4.42435	TRUE	<rdkit.Chem.rdchem.Mol object at 0x7facdf674970>
CHEMBL1828883	37930	nM	COc1ccc(CC(=O)NS(=O)(=O)c2ccc(Cl)cc2)cc1	4.42102	TRUE	<rdkit.Chem.rdchem.Mol object at 0x7facdf674a50>
CHEMBL4575427	37930	nM	N=C1N=C(NCCS(=O)(=O)O)/C(=C/C(O)CNC(=O)c2cc(Br)c[nH]2)N1	4.42102	TRUE	<rdkit.Chem.rdchem.Mol object at 0x7facdf674ac0>
CHEMBL602645	39640	nM	CCCN(CCC)C(=O)c1ccc(N(CCCl)CCCl)cc1	4.40187	TRUE	<rdkit.Chem.rdchem.Mol object at 0x7facdf674c10>
CHEMBL4068254	40000	nM	c1ccc(-c2nnc(Cc3nc4ccccc4[nH]3)o2)cc1	4.39794	TRUE	<rdkit.Chem.rdchem.Mol object at 0x7facdf660580>
CHEMBL1173789	40000	nM	Cc1ncc([N+](=O)[O-])n1CCOC(=O)/C=C/c1ccccc1[N+](=O)[O-]	4.39794	TRUE	<rdkit.Chem.rdchem.Mol object at 0x7facdf674cf0>
CHEMBL113690	40000	nM	CCCCn1c(Cc2cc(OC)c(OC)c(OC)c2)nc2c(N)ncnc21	4.39794	TRUE	<rdkit.Chem.rdchem.Mol object at 0x7facdf674d60>
CHEMBL1172877	41260	nM	Cc1ncc([N+](=O)[O-])n1CCOC(=O)/C=C/c1ccccc1F	4.38447	TRUE	<rdkit.Chem.rdchem.Mol object at 0x7facdf674dd0>
CHEMBL31184	41503	nM	c1ccc2c(c1)cc1ccc3cccc4ccc2c1c34	4.38192	TRUE	<rdkit.Chem.rdchem.Mol object at 0x7facdf674e40>
CHEMBL589119	44510	nM	CCCCN(CCCC)C(=O)c1ccc(N(CCCl)CCCl)cc1	4.35154	TRUE	<rdkit.Chem.rdchem.Mol object at 0x7facdf674f20>
CHEMBL1172947	44850	nM	Cc1ncc([N+](=O)[O-])n1CCOC(=O)/C=C/c1ccccc1Br	4.34824	TRUE	<rdkit.Chem.rdchem.Mol object at 0x7facdf674f90>
CHEMBL14326	45000	nM	Nc1ncnc2c1ncn2[C@@H]1O[C@H](CO)[C@@H](O)[C@H]1S	4.34679	TRUE	<rdkit.Chem.rdchem.Mol object at 0x7facdf675040>
CHEMBL592141	45510	nM	COc1cccc(/C=N/NC2=NC(=O)CS2)c1	4.34189	TRUE	<rdkit.Chem.rdchem.Mol object at 0x7facdf6750b0>
CHEMBL4083493	45700	nM	Clc1ccc2nc(Cc3nnc(-c4ccccc4Cl)o3)[nH]c2c1	4.34008	TRUE	<rdkit.Chem.rdchem.Mol object at 0x7facdf675120>
CHEMBL589259	46100	nM	CC(C)(C)NC(=O)c1ccc(N(CCCl)CCCl)cc1	4.3363	TRUE	<rdkit.Chem.rdchem.Mol object at 0x7facdf675190>
CHEMBL4074782	46800	nM	Cc1ccccc1-c1nnc(Cc2nc3ccccc3[nH]2)o1	4.32975	TRUE	<rdkit.Chem.rdchem.Mol object at 0x7facdf675200>
CHEMBL589165	47000	nM	O=C1CSC(NN=C2CCCCCC2)=N1	4.3279	TRUE	<rdkit.Chem.rdchem.Mol object at 0x7facdf675270>
CHEMBL589503	48350	nM	O=C(NC1CCCC1)c1ccc(N(CCCl)CCCl)cc1	4.3156	TRUE	<rdkit.Chem.rdchem.Mol object at 0x7facdf6752e0>
CHEMBL201511	50000	nM	COc1cc(C2=C(c3c[nH]c4ccccc34)C(=O)NC2=O)cc(OC)c1OC	4.30103	TRUE	<rdkit.Chem.rdchem.Mol object at 0x7facdf675430>
CHEMBL4087921	52400	nM	c1ccc(OCc2nnc(Cc3nc4ccccc4[nH]3)o2)cc1	4.28067	TRUE	<rdkit.Chem.rdchem.Mol object at 0x7facdf6754a0>
CHEMBL4102942	52600	nM	Clc1ccc(-c2nnc(Cc3nc4ccc(Cl)cc4[nH]3)o2)c(Cl)c1	4.27901	TRUE	<rdkit.Chem.rdchem.Mol object at 0x7facdf675510>
CHEMBL269528	53500	nM	N#Cc1n[nH]nc1-c1ccccc1	4.27165	TRUE	<rdkit.Chem.rdchem.Mol object at 0x7facdf675580>
CHEMBL3133826	54800	nM	CCOc1cccc(Nc2ccnc3[nH]c4ccc(S(=O)(=O)N5CCOCC5)cc4c23)c1	4.26122	TRUE	<rdkit.Chem.rdchem.Mol object at 0x7facdf6755f0>
CHEMBL4102214	57600	nM	c1ccc(C(c2ccccc2)c2nnc(Cc3nc4ccccc4[nH]3)o2)cc1	4.23958	TRUE	<rdkit.Chem.rdchem.Mol object at 0x7facdf6756d0>
CHEMBL89505	64800	nM	CC(C)(C)c1cc(/C=C2\C(=O)Nc3ccccc32)cc(C(C)(C)C)c1O	4.18842	TRUE	<rdkit.Chem.rdchem.Mol object at 0x7facdf6757b0>
CHEMBL1683957	65000	nM	Cc1c(Nc2ccc(OCc3cccc(F)c3)c(Cl)c2)ncnc1-c1ccccc1	4.18709	TRUE	<rdkit.Chem.rdchem.Mol object at 0x7facdf675820>
CHEMBL104	66405	nM	Clc1ccccc1C(c1ccccc1)(c1ccccc1)n1ccnc1	4.1778	TRUE	<rdkit.Chem.rdchem.Mol object at 0x7facdf675890>
CHEMBL3133834	91200	nM	COc1cccc(Nc2ccnc3[nH]c4ccc(Br)cc4c23)c1	4.04001	TRUE	<rdkit.Chem.rdchem.Mol object at 0x7facdf6759e0>
CHEMBL93464	91325	nM	C/C=C/C(=O)Nc1ccc2ncnc(Nc3cccc(Br)c3)c2c1	4.03941	TRUE	<rdkit.Chem.rdchem.Mol object at 0x7facdf675a50>
CHEMBL86432	91400	nM	CSc1ccc(/C=C2\C(=O)Nc3cccc(C)c32)s1	4.03905	TRUE	<rdkit.Chem.rdchem.Mol object at 0x7facdf675ac0>
CHEMBL521155	95000	nM	Nc1ncnc2c1ncn2CC(=O)c1c[nH]c2ccccc12	4.02228	TRUE	<rdkit.Chem.rdchem.Mol object at 0x7facdf675ba0>
CHEMBL364272	120000	nM	Nc1ncnc2[nH]c(Sc3cc(Cl)ccc3Cl)nc12	3.92082	TRUE	<rdkit.Chem.rdchem.Mol object at 0x7facdf675c10>
CHEMBL190654	310000	nM	CCCCn1c(S(=O)(=O)c2cc(OC)c(OC)c(OC)c2)nc2c(N)ncnc21	3.50864	TRUE	<rdkit.Chem.rdchem.Mol object at 0x7facdf675c80>
