# Supplementary material for: AI-Driven Drug Discovery for Breast Cancer Based on ERBB2 Identified Through Network Pharmacology and GEO Data Analysis
Source: Research Square preprint supplement (doi:10.21203/rs.3.rs-6047847/v1), 2025-02-26
Supplement: Supplementary file 2 [file 15bd226d556718c61e9ecdd8.xlsx]

## Sheet: RF
S2.RF model screening for core genes
Gene	Importance
ERBB2	0.0549451
SREBF2	0.0549451
FABP4	0.0549451
MYC	0.043956
ABCB1	0.043956
CDC25A	0.043956
GJA1	0.043956
GSK3B	0.032967
BIRC2	0.032967
GRB2	0.032967
STAT6	0.032967
ROCK1	0.032967
PTPN1	0.032967
TTK	0.032967
SIRT2	0.032967
PSMB5	0.032967
