# Supplementary material for: AI-Driven Drug Discovery for Breast Cancer Based on ERBB2 Identified Through Network Pharmacology and GEO Data Analysis
Source: Research Square preprint supplement (doi:10.21203/rs.3.rs-6047847/v1), 2025-02-26
Supplement: Supplementary file 3 [file 168868be71d53acfc3539a78.xlsx]

## Sheet: Lasso
S4.Lasso model screening for core genes
Gene	Importance
(Intercept)	1.59545
BCL2	-1.27089
JUN	0.58022
CREB1	0.233894
ERBB2	2.84074
VCP	0.400978
ROCK2	0.543203
