# Supplementary material for: AI-Driven Drug Discovery for Breast Cancer Based on ERBB2 Identified Through Network Pharmacology and GEO Data Analysis
Source: Research Square preprint supplement (doi:10.21203/rs.3.rs-6047847/v1), 2025-02-26
Supplement: Supplementary file 4 [file 2c22c27575c6e38ce81d11f8.xlsx]

## Sheet: DEGs
S1.Differential genes expression in Breast Cancer patients and normal group
id	logFC	adj.P.Val
LOC731002	-3.76477	1.52946e-07
CCR6	7.27419	1.52946e-07
RPS26L1	3.89433	1.89647e-07
SOX10	-4.11948	1.89647e-07
LOC388524	7.76833	2.37044e-07
MGC16703	7.14666	2.50697e-07
COPS2	-3.32689	2.78718e-07
NOMO2	4.62044	2.82347e-07
SHCBP1	5.75645	2.82347e-07
FKSG44	-4.17457	2.82347e-07
ATP5G2	-3.01455	3.22432e-07
SEC61A1	3.87864	3.22432e-07
FANCG	2.8755	3.22432e-07
ITM2B	-4.55963	3.22432e-07
CDC37L1	-3.79671	3.26241e-07
LOC731640	-3.05349	3.26241e-07
LOC641750	-6.68278	3.26241e-07
CDCA7	2.69865	4.58118e-07
SSB	-4.42361	4.58118e-07
NACA	4.2129	4.58118e-07
RIOK3	-3.67197	4.58118e-07
LOC642947	6.50931	4.63028e-07
C4orf18	-3.93264	4.63028e-07
ZNF302	3.49271	4.63028e-07
SEPP1	-4.62644	4.70995e-07
LOC641848	-5.067	4.87675e-07
EEF1E1	-4.17353	4.87675e-07
RPS27L	-3.31986	5.52024e-07
CARM1	5.58892	6.07848e-07
CRYAB	-4.15923	6.15861e-07
IGJ	-6.54214	6.15861e-07
BGN	5.62236	6.15861e-07
RPS24	-3.27823	6.15861e-07
LOC643949	-3.45356	6.15861e-07
WDR51A	3.77463	6.15861e-07
FTHL8	-4.60674	6.15861e-07
C19orf31	4.23896	6.29696e-07
ECT2	4.28164	6.36286e-07
IMAA	3.11085	6.36286e-07
MRPL55	3.33049	6.36286e-07
MAPKAP1	2.61711	6.39646e-07
THYN1	-4.18501	6.40071e-07
LOC642989	-4.59078	6.69494e-07
FKBP9L	2.28311	7.02403e-07
SNRP70	-4.62119	7.22655e-07
LOC402677	-4.65841	7.24119e-07
FAM115A	3.15464	7.24119e-07
RPL6	5.45283	7.24119e-07
ACAD8	-2.55773	7.84544e-07
RNF34	-3.82316	7.84544e-07
ITIH5	4.07878	7.84544e-07
DTWD1	-2.57654	8.04109e-07
ARHGAP17	-3.16739	8.04109e-07
XPNPEP3	3.66054	8.04574e-07
LOC647856	-3.44651	8.17059e-07
SHISA5	4.31051	8.47108e-07
TIMP2	2.53408	8.48117e-07
VPS36	-2.64262	8.95039e-07
SLC26A3	-6.06288	9.28275e-07
NAG18	3.89931	9.44984e-07
SELT	-1.92913	9.5393e-07
SFRS12	-2.27311	9.5393e-07
PLEKHA5	-3.25117	9.59537e-07
CCL28	-3.68942	9.59537e-07
SHPK	2.87558	9.59537e-07
PLSCR3	5.02308	9.71176e-07
CTHRC1	3.7544	9.71176e-07
TRMT5	6.09393	9.71176e-07
GCNT1	-2.39377	1.04408e-06
ZNF549	3.07256	1.04408e-06
LOC647074	-2.74667	1.04408e-06
LSM12	3.00151	1.04408e-06
C6orf62	-2.43593	1.07147e-06
PIGR	-5.2956	1.07722e-06
CGGBP1	-2.83956	1.226e-06
CHRNA5	2.32846	1.226e-06
MCM6	4.3429	1.226e-06
BBOX1	-4.84841	1.226e-06
LOC641704	-3.60317	1.226e-06
LOC399900	6.29907	1.226e-06
TOMM20	-2.19768	1.25104e-06
LOC346950	-3.64894	1.25104e-06
LRAP	5.01085	1.25257e-06
FTHL7	3.64618	1.26746e-06
SOSTDC1	-2.51026	1.26746e-06
SKP1A	2.35359	1.28377e-06
IDH3B	2.99626	1.29166e-06
ADAMTS5	-2.87253	1.31982e-06
CTTN	2.79084	1.35339e-06
GGA1	2.23878	1.35339e-06
C8orf45	4.05838	1.35339e-06
RFNG	-3.066	1.38339e-06
ATP6V0C	3.19076	1.38339e-06
RPL32	3.31757	1.38339e-06
MTSS1	3.26741	1.3834e-06
LOC347292	-2.64038	1.3834e-06
LOC649150	-3.77413	1.3834e-06
ORC6L	4.72891	1.39501e-06
COX10	2.19581	1.39908e-06
FTHL2	-5.26103	1.39908e-06
SELK	1.90282	1.48447e-06
RPL8	4.83159	1.48447e-06
WWP1	-2.80319	1.48447e-06
PEX3	-2.83841	1.51616e-06
CLCA4	-2.18276	1.59896e-06
CCDC104	-2.54687	1.61359e-06
LOC387820	-3.00119	1.65974e-06
C3orf1	-3.81837	1.65974e-06
GNAS	4.04337	1.6756e-06
KCNH6	2.00775	1.6756e-06
LOC648249	3.39439	1.6756e-06
C1orf164	2.69531	1.73274e-06
CSNK1E	-1.91178	1.75e-06
MGC29891	3.54329	1.76802e-06
POMP	-5.74603	1.76802e-06
ATP9A	1.88564	1.76802e-06
ZNF14	-4.75974	1.89184e-06
BET1L	-3.58021	1.90579e-06
AKR1D1	3.6764	1.90579e-06
CALML5	-3.58415	1.90579e-06
FOXK1	1.75857	1.92946e-06
FXYD5	2.20408	1.95301e-06
KRCC1	-2.41033	1.95301e-06
HBXIP	2.85256	1.95301e-06
C9orf61	-2.7898	1.97519e-06
SMARCD1	3.99489	2.01557e-06
SERPINA5	-3.65945	2.08359e-06
VDAC2	-6.6141	2.08679e-06
VCL	3.5963	2.09281e-06
KCTD12	-3.51175	2.09281e-06
CDKN2AIPNL	3.59537	2.09281e-06
C21orf24	3.22278	2.14844e-06
CBY1	-2.823	2.14844e-06
PREPL	-2.38877	2.14844e-06
COL17A1	-4.43675	2.14844e-06
FAM127B	-1.58816	2.14844e-06
FTHL11	-3.12736	2.16583e-06
PANK2	3.59762	2.16583e-06
LOC407835	1.81943	2.16583e-06
CLDN8	-5.3235	2.16583e-06
MSH3	2.89687	2.16583e-06
RICTOR	-3.72894	2.17385e-06
CYP20A1	2.32328	2.19987e-06
CHST9	-1.80678	2.20786e-06
LOC388789	-2.34441	2.35153e-06
FAM8A1	-3.14962	2.35153e-06
ROPN1	-5.00265	2.35153e-06
RPL23	-3.52505	2.37951e-06
ZC3H3	3.25881	2.42502e-06
APITD1	1.70677	2.42677e-06
KRT81	2.60856	2.42677e-06
SLC6A14	-4.75713	2.42677e-06
MGC3207	2.48607	2.47737e-06
BOC	-2.86673	2.48723e-06
FARSLB	5.61418	2.58354e-06
ZNF146	2.98958	2.61041e-06
CDC26	2.58208	2.68297e-06
NDUFA5	-2.86034	2.80514e-06
ZNF598	2.78662	2.84961e-06
RPS28	-2.43941	2.84961e-06
KRT15	-6.82939	2.84961e-06
LOC648622	-1.98531	2.85103e-06
C1D	-1.88967	2.89621e-06
DOCK7	-2.07329	2.90392e-06
KBTBD7	-1.60526	2.96517e-06
NAT5	-5.74195	2.96517e-06
LOC643430	-4.33444	2.96547e-06
ITFG1	-3.19436	2.98087e-06
SFRS17A	1.90104	2.99779e-06
C6orf160	-3.13895	3.00375e-06
GRIPAP1	1.7805	3.00377e-06
C16orf69	-2.36549	3.01202e-06
CACNB3	3.74113	3.01202e-06
NME1-NME2	2.82265	3.01202e-06
RNASEN	-3.13093	3.01202e-06
TAF1C	-3.68925	3.04788e-06
METTL7A	-4.17207	3.04788e-06
BTBD15	-2.93478	3.1164e-06
APPL1	-2.60648	3.12196e-06
GPR172A	2.5014	3.14059e-06
C4orf16	-2.62246	3.14059e-06
SLC17A5	-3.769	3.14059e-06
LSM1	3.29001	3.14059e-06
DKK3	2.11552	3.14059e-06
TRIB3	1.8413	3.14913e-06
TMEM99	-2.08769	3.14913e-06
ABI1	-2.81549	3.14913e-06
LGR6	-1.59144	3.17309e-06
ANKRD9	1.85735	3.17309e-06
SPCS2	-1.89104	3.17309e-06
MCM8	-7.00586	3.18053e-06
LOC389787	-3.32858	3.19208e-06
LOC285074	2.34021	3.19208e-06
LOC645138	-3.29013	3.19208e-06
ANXA7	2.36883	3.24694e-06
LOC653314	-2.89965	3.27808e-06
PMP22	2.66859	3.27808e-06
LRFN3	1.92642	3.39349e-06
NASP	-2.39457	3.39349e-06
PAIP2	1.47781	3.41172e-06
CCAR1	-3.04925	3.41172e-06
ANKRD11	2.02372	3.41172e-06
GYPC	-2.62367	3.4616e-06
RDH14	2.45219	3.58784e-06
NHLRC3	-2.0225	3.58784e-06
PDE4C	6.62827	3.58784e-06
FBXW11	-1.66426	3.58784e-06
CPT1C	2.26669	3.58784e-06
LOC137107	-2.68914	3.58784e-06
SYT11	2.94866	3.63465e-06
ODC1	2.49702	3.6407e-06
PNRC2	1.94002	3.64241e-06
BAZ1B	1.90528	3.6509e-06
AP3M1	-1.46327	3.6509e-06
NONO	2.55344	3.68947e-06
TMEM203	3.56614	3.70243e-06
MAOB	-3.19868	3.7321e-06
SEMA4B	-3.39713	3.83249e-06
C1orf2	2.56225	3.86763e-06
LOC652694	-4.379	3.86763e-06
MAN2B2	-2.58233	3.86767e-06
AZI1	1.44578	3.92929e-06
PIK4CA	1.93256	3.92929e-06
STX19	-2.75313	3.9308e-06
FAM10A4	-2.91728	3.93103e-06
LOC648343	-3.38288	4.03917e-06
GABRP	-4.9092	4.05672e-06
LOC645671	-3.29624	4.0582e-06
G6PC3	-1.97315	4.11768e-06
ATP5L	-2.26092	4.18561e-06
DDX59	-1.98819	4.18561e-06
MTIF2	2.17032	4.22632e-06
F2R	4.66578	4.22912e-06
LOC648659	-3.81509	4.22912e-06
RPS15	3.43606	4.25883e-06
SIAH1	-1.50939	4.30698e-06
BCAR1	1.72701	4.30698e-06
GPM6B	-3.75253	4.30698e-06
PABPC3	-1.74745	4.30698e-06
HOXB8	1.46055	4.30698e-06
CD320	2.96394	4.48047e-06
INPPL1	1.81762	4.53513e-06
BUB3	-2.69609	4.53513e-06
FAM100B	-2.65145	4.64962e-06
PRMT3	2.63774	4.70788e-06
LOC653971	-4.72379	4.85441e-06
LOC642250	-3.01844	4.85441e-06
LOC220433	-4.34498	4.85441e-06
CCDC77	2.5365	4.97725e-06
B4GALT5	2.11322	5.00406e-06
CCDC127	-1.43434	5.00406e-06
ST6GALNAC2	-3.1183	5.00406e-06
DEFB1	-3.76496	5.00406e-06
CATSPER2	4.98066	5.00406e-06
SRP9	2.48151	5.00406e-06
SCFD1	2.44228	5.07535e-06
KIAA1199	3.74338	5.08327e-06
SDHA	2.83742	5.16923e-06
NUDT21	-1.86408	5.16923e-06
C11orf71	-1.85605	5.21675e-06
CD9	-3.73488	5.21675e-06
OSBPL8	-2.50732	5.21675e-06
ESF1	-1.9567	5.21675e-06
SUMO1P3	-2.74791	5.21675e-06
KRT5	-4.42618	5.27252e-06
MRPL11	-3.38028	5.27252e-06
FAM156A	2.35764	5.27252e-06
ISCA2	-2.29888	5.27252e-06
PFDN5	-1.3105	5.27252e-06
CASP8AP2	-1.52566	5.27321e-06
RILPL1	1.95675	5.27321e-06
JTB	5.37705	5.31215e-06
SIRPG	1.18221	5.33503e-06
TNRC6B	-3.24452	5.33503e-06
DDX3X	-2.51372	5.33503e-06
TRIM24	-2.27212	5.51878e-06
RAB18	-1.37681	5.54932e-06
LOC283412	-2.85569	5.55982e-06
SEMA3E	1.62653	5.55982e-06
ATN1	-1.90256	5.55982e-06
NEK2	2.26855	5.55982e-06
LYRM5	-1.95371	5.56568e-06
ARHGAP18	-2.02128	5.62414e-06
C14orf131	2.158	5.62414e-06
BMS1	-1.78022	5.62414e-06
SACM1L	-2.22673	5.66299e-06
TRIM39	1.61108	5.67337e-06
EIF6	2.54774	5.69258e-06
MAN2A1	-2.57523	5.69929e-06
TOP1MT	2.04012	5.69929e-06
SLC2A6	3.03496	5.69929e-06
MRPL9	-1.87705	5.81105e-06
LOC645649	-2.74092	5.82202e-06
SFRS6	3.902	6.101e-06
FAM3D	-2.27663	6.15009e-06
EXOC7	2.02273	6.15886e-06
RPL39L	2.58305	6.40343e-06
GALNT1	-2.1074	6.41647e-06
TSN	-2.43123	6.41837e-06
CLTA	2.79947	6.4186e-06
FEN1	3.51873	6.49251e-06
C8orf37	2.76404	6.49251e-06
EIF2AK1	2.8534	6.49251e-06
EXOC8	-2.06057	6.49251e-06
SAA2	-3.63928	6.50377e-06
C1GALT1C1	-2.74578	6.76423e-06
GON4L	-1.62504	6.78116e-06
RPL13A	-2.36035	6.80448e-06
TM4SF1	-2.11512	6.83435e-06
RPL23AP7	1.6251	6.8686e-06
CMTM7	-5.06204	6.87071e-06
DBT	-1.84977	6.90337e-06
YES1	-1.55738	6.92197e-06
ZHX1	-4.66812	6.92197e-06
FAM57A	1.2709	6.93264e-06
LRRC1	-1.8075	6.99657e-06
ST3GAL1	2.06616	7.09281e-06
SHFM1	2.65599	7.21092e-06
DAP	-2.71678	7.24594e-06
FBLN1	1.59957	7.29435e-06
RTN4	1.56009	7.30159e-06
ZNF473	1.49227	7.30159e-06
PPP2R4	1.82232	7.30159e-06
SERINC3	-1.56908	7.30159e-06
LOC652493	-3.9044	7.30159e-06
C6orf1	-3.58721	7.30159e-06
SURF6	3.4261	7.32785e-06
LOC441377	-2.52836	7.36818e-06
CHPT1	-2.55882	7.42266e-06
HIST1H2BJ	2.39165	7.43875e-06
AQP1	-3.66397	7.45147e-06
XRCC5	-3.29236	7.59457e-06
GSTT1	-3.8909	7.59457e-06
GRHL1	-2.074	7.63042e-06
UQCRC2	-2.31435	7.63042e-06
SLC16A12	3.29176	7.63042e-06
ZCCHC6	-3.23278	7.67002e-06
TMEM32	2.44659	7.7586e-06
PPAN	1.61914	7.76497e-06
UBE3C	1.96411	7.83235e-06
C2orf33	-1.35903	7.83309e-06
ATL3	2.24004	7.83309e-06
CREB1	3.93948	7.8408e-06
KRT14	-5.04924	7.85471e-06
RAB33B	-2.78052	7.91451e-06
ZNF668	1.60243	8.04324e-06
SLC25A43	2.1495	8.04324e-06
CMPK1	-2.42901	8.04324e-06
KIAA1033	-2.8594	8.04324e-06
GPC4	2.23914	8.04324e-06
PTCD1	2.33247	8.04324e-06
POT1	-1.70476	8.04324e-06
TNK2	1.36516	8.04324e-06
LIMK1	-2.84535	8.12363e-06
ANXA4	-2.20566	8.19435e-06
LOC644591	-1.52723	8.19435e-06
TPMT	1.8318	8.19435e-06
KDELR1	3.49717	8.19435e-06
UBE4B	-1.45298	8.30608e-06
GBAS	-2.00585	8.30608e-06
ZNF695	1.45142	8.31911e-06
LOC641849	-3.60631	8.52241e-06
TAF12	1.75857	8.63268e-06
HSPD1	3.60705	8.97586e-06
TMEM17	2.55356	9.14594e-06
LOC389672	-2.01103	9.3702e-06
C8orf76	1.50649	9.4949e-06
IFP38	-3.69491	9.49589e-06
LOC441376	-2.19055	9.52778e-06
GPR1	3.03126	9.52778e-06
ENAH	-2.3451	9.53888e-06
DUSP19	4.28925	9.53888e-06
ZNF711	-1.83033	9.54295e-06
PEX10	-2.58753	9.55719e-06
LOC647908	-2.72264	9.76872e-06
LOC647673	-3.12945	9.83384e-06
C9orf80	2.11769	9.85162e-06
ZNF180	-2.07743	9.85348e-06
BEX4	-2.36815	9.85348e-06
PRMT7	-1.96869	9.85348e-06
PSMB7	1.37091	9.85348e-06
NUDC	1.83145	9.85348e-06
LOC644094	-1.94769	9.85348e-06
AIRE	2.94966	9.85348e-06
DUXAP3	1.82822	9.85348e-06
CLUAP1	1.88934	9.85921e-06
RPS26	3.5389	9.99541e-06
MLLT3	-1.62897	1.00024e-05
CDAN1	3.00739	1.00024e-05
HLF	-1.73874	1.00066e-05
PXMP2	1.3877	1.00659e-05
AKR1A1	-2.42135	1.007e-05
NAV1	2.24729	1.0117e-05
LOC731999	1.33298	1.01429e-05
RAB1A	-1.5975	1.01429e-05
C19orf52	1.83204	1.01429e-05
IL20RA	-2.79512	1.01429e-05
SERPINB6	-2.03278	1.02528e-05
YAP1	-2.41839	1.02558e-05
MGC10997	2.47405	1.02558e-05
FLJ46309	2.06659	1.02967e-05
ZFAND1	-1.34038	1.02967e-05
ARL6IP6	-2.21486	1.02967e-05
NBPF14	1.63698	1.02967e-05
YWHAZ	4.52565	1.0302e-05
C20orf111	2.65159	1.0548e-05
C3orf34	3.04921	1.05657e-05
SENP8	-1.32994	1.05657e-05
TEX261	-1.45923	1.05657e-05
MLSTD1	2.32984	1.05657e-05
UTP3	-2.62517	1.05852e-05
CAPG	-1.35499	1.06507e-05
MUT	-1.68832	1.06507e-05
PPP1R15B	-1.36898	1.06961e-05
UBE2Q1	1.24692	1.0869e-05
ADD3	-2.80052	1.09625e-05
LOC728481	-2.76044	1.10801e-05
ZDHHC14	-1.42017	1.10801e-05
SAA4	-1.88976	1.10801e-05
PNPT1	2.49448	1.10801e-05
DDX51	3.89074	1.10801e-05
ATP6V1B1	-3.38172	1.11527e-05
MAFA	1.28233	1.117e-05
CMTM3	1.44754	1.117e-05
HYPK	2.5087	1.11977e-05
SLC35F2	2.31861	1.12248e-05
KIAA1219	1.57907	1.12248e-05
REPIN1	4.94793	1.12654e-05
RANGRF	-1.93476	1.12654e-05
NBEA	-1.82443	1.12789e-05
EIF4G1	1.85624	1.13781e-05
SAMD9	1.62198	1.14326e-05
EEF1D	3.6641	1.14586e-05
CD164	-4.12041	1.14586e-05
DIABLO	3.46893	1.14655e-05
CCDC91	-2.34039	1.1626e-05
LOC731985	-2.17927	1.16468e-05
BICD2	2.02093	1.1708e-05
F8A1	1.80075	1.17564e-05
ARHGAP12	-2.27063	1.17564e-05
TANK	-1.64979	1.18375e-05
CKAP5	3.08969	1.19417e-05
KLHDC8B	3.22952	1.19417e-05
GPX2	-1.69437	1.19417e-05
JMJD2B	-1.20231	1.2034e-05
PPID	-1.79095	1.2034e-05
MID1	-2.57021	1.2089e-05
ADARB1	1.29367	1.2089e-05
FUBP3	-2.71705	1.23601e-05
CHES1	3.04429	1.24306e-05
TSC22D4	-4.65879	1.25984e-05
RPL5	-1.6506	1.25984e-05
PMS1	-2.05781	1.26313e-05
ID4	-3.26482	1.26313e-05
PBLD	-1.0266	1.26905e-05
GOLM1	1.53786	1.27464e-05
MRPL27	1.45388	1.27464e-05
PPIL3	-4.85676	1.2801e-05
IGBP1	-1.59083	1.2802e-05
CSE1L	1.21292	1.2802e-05
SNX19	-1.86775	1.28166e-05
LPCAT2	1.77798	1.29156e-05
TM2D3	1.80841	1.30095e-05
MRPL14	2.5746	1.30314e-05
FTHL12	-2.6549	1.31875e-05
HTATSF1	-2.40439	1.31878e-05
TARDBP	-1.57302	1.31878e-05
VCP	4.19389	1.324e-05
PHOSPHO2	-1.82284	1.32407e-05
WRNIP1	1.40896	1.32407e-05
ORC2L	1.28201	1.32407e-05
RTKN	1.45088	1.32407e-05
LOC647450	-3.69682	1.32613e-05
BRMS1	2.40224	1.32649e-05
ZNHIT3	-2.33273	1.32649e-05
IMP4	1.81041	1.33309e-05
ALKBH7	-3.4869	1.33479e-05
PTPRA	1.29646	1.33479e-05
BCL2L1	2.1753	1.33479e-05
ZW10	3.74312	1.34083e-05
IL1R1	-1.94177	1.34083e-05
IQGAP2	-2.54332	1.34443e-05
PCNA	1.32222	1.34443e-05
C19orf6	2.0914	1.34497e-05
SHROOM2	2.35527	1.34497e-05
CLIP2	-2.41147	1.36441e-05
NEDD8	4.77137	1.38556e-05
ITGA2	-1.71968	1.40231e-05
SPAG16	-1.78933	1.40231e-05
FNBP1L	1.4548	1.40232e-05
DTWD2	1.86044	1.40232e-05
SMPDL3A	-2.01568	1.43088e-05
ATAD2	3.29261	1.43623e-05
LOC653232	-1.76967	1.44071e-05
PDIA6	1.89756	1.45793e-05
MOBKL2C	-2.27955	1.45793e-05
PPIG	-1.06133	1.46527e-05
EIF4EBP3	-1.96921	1.46527e-05
LOC729559	1.87256	1.46527e-05
C1orf9	-1.85887	1.47219e-05
STYXL1	2.46289	1.47219e-05
SDHC	1.84657	1.48399e-05
STOX1	-1.14737	1.48399e-05
UBTD1	1.62095	1.4995e-05
HEBP2	-1.52929	1.52283e-05
VPS16	1.56703	1.52283e-05
ROCK2	2.06769	1.52982e-05
C1orf109	3.1701	1.53546e-05
RNF5	1.27878	1.53638e-05
MUTED	-1.56575	1.59716e-05
GCLC	-1.72938	1.60702e-05
MOBKL2B	-1.80296	1.60702e-05
WDR77	2.37992	1.60702e-05
CPE	-3.44084	1.611e-05
WBP11	2.0719	1.62842e-05
KIAA0999	-1.75733	1.62842e-05
ATRN	-1.0674	1.62842e-05
RSRC2	-2.39782	1.62842e-05
GTF2H4	1.80631	1.63744e-05
ATF4	3.35851	1.65229e-05
TNIP2	-1.8961	1.66912e-05
LOC653884	2.0644	1.69078e-05
ANKRD5	-1.88253	1.69203e-05
RANBP6	-1.16576	1.69203e-05
TCEAL8	-2.33825	1.69207e-05
FZD1	-3.41387	1.69207e-05
TOR3A	2.3679	1.69207e-05
MMP14	1.17666	1.70317e-05
MAP2K2	2.87273	1.70317e-05
LOC653596	-1.19515	1.70765e-05
TRAF3IP2	1.76859	1.71384e-05
PLCB1	-1.29317	1.71438e-05
PPP3R1	1.77191	1.7186e-05
LOC648245	-2.44009	1.73055e-05
TUBE1	-1.35339	1.73055e-05
PRRX1	2.19227	1.73055e-05
KLHL2	-1.65821	1.73055e-05
GAS2L3	1.88596	1.73055e-05
GATAD2A	1.58012	1.73055e-05
C6orf203	-1.68144	1.73055e-05
CNOT6	1.67984	1.73055e-05
LOC642113	-3.65973	1.74926e-05
FRZB	-2.8243	1.75048e-05
LY75	-2.13894	1.75048e-05
CEP57	-1.91213	1.75048e-05
FAM13A1	-2.09916	1.75329e-05
TSPAN14	-2.06077	1.75559e-05
ZNF658	-1.19896	1.75559e-05
PPIB	-5.55317	1.76083e-05
SH3YL1	-4.46631	1.76527e-05
FLJ40722	-1.53344	1.77562e-05
PIK3R1	-2.29438	1.78172e-05
NTRK2	-2.6275	1.78172e-05
BCAS2	-2.01295	1.78537e-05
SLC38A2	-1.91082	1.80091e-05
PDCD6IP	-2.36976	1.81058e-05
BTN3A2	-1.22022	1.82214e-05
ERBB2	1.42604	1.82242e-05
RPS27	-1.43245	1.83526e-05
OTUD4	-1.19188	1.83786e-05
PIK3C2G	-1.86673	1.88257e-05
LOC644774	3.07825	1.89742e-05
PCAF	-2.4299	1.90029e-05
ENC1	1.71229	1.90029e-05
GPBP1	-1.4831	1.90129e-05
CTRC	1.16038	1.90129e-05
AMN1	-1.50881	1.90129e-05
RPL7	-3.15067	1.90129e-05
TRAPPC2	-2.23042	1.90895e-05
SNORD100	1.57343	1.91036e-05
GALE	1.12844	1.91961e-05
TXN2	-2.11577	1.92379e-05
SLC30A9	-1.45069	1.92628e-05
ELF5	-3.56326	1.93466e-05
MEG3	2.4427	1.95133e-05
SLC22A18	-1.8342	1.95883e-05
COBL	-3.11727	1.95883e-05
C12orf62	-1.72835	1.95883e-05
CLEC2D	-1.04327	1.96437e-05
CANX	1.30114	1.97262e-05
HIST1H2BK	-2.04903	2.00086e-05
SPHAR	-1.82715	2.00113e-05
ZBTB41	-1.79904	2.00113e-05
HIBADH	-1.37888	2.00113e-05
SNX11	1.41683	2.02626e-05
LOC647000	2.9535	2.02626e-05
HDHD2	-2.6019	2.03008e-05
MRPL49	-1.72917	2.03366e-05
ADD1	-5.31096	2.03366e-05
EXOSC7	1.31085	2.03406e-05
CTDSP1	-2.09605	2.05301e-05
ANKRD6	1.61927	2.06982e-05
EGF	-1.89471	2.09656e-05
LOC57228	1.54635	2.09656e-05
STK24	2.07128	2.09656e-05
KIAA1542	-2.86546	2.10467e-05
MCM4	2.62363	2.12012e-05
RSPO1	-1.66659	2.12012e-05
LOC647346	1.5842	2.12308e-05
ZDHHC16	-4.21671	2.14692e-05
SFRS11	-3.20925	2.16689e-05
CXorf40A	1.48779	2.16849e-05
FYTTD1	-2.3096	2.17686e-05
PPAP2A	-1.4367	2.18109e-05
LGALS7	-2.38242	2.20882e-05
BCL2	-1.18877	2.20882e-05
RBMS1	2.331	2.21409e-05
TMEM5	1.15134	2.22425e-05
MPND	-2.92998	2.22425e-05
C20orf24	1.2512	2.24435e-05
TTLL1	-1.48637	2.25127e-05
RNF135	-1.90995	2.25127e-05
MFAP5	2.65183	2.25127e-05
NRAS	2.90909	2.26239e-05
GOLPH4	1.89305	2.26594e-05
RNF20	-1.0386	2.27046e-05
MYBPC1	-3.01158	2.27046e-05
HCG2P7	2.75648	2.29033e-05
C3orf26	1.69709	2.31425e-05
LOC440498	-1.51266	2.32242e-05
NCK1	1.1967	2.32711e-05
ARL6IP1	-2.2078	2.33266e-05
CD99	-1.10123	2.33423e-05
TIMP3	2.99387	2.34241e-05
USP8	-1.37938	2.34241e-05
LDOC1L	-1.78865	2.35555e-05
PUF60	1.68596	2.37394e-05
KLHDC2	-1.55452	2.37394e-05
LOC651453	-2.93092	2.38104e-05
APOD	-5.89017	2.39062e-05
C9orf90	2.23933	2.39062e-05
CUTL1	2.70325	2.39062e-05
IFI27	4.23047	2.40331e-05
WRB	-1.20156	2.43349e-05
TIGD5	2.4974	2.43741e-05
MRPL3	-2.20025	2.44356e-05
SPN	-1.56313	2.44494e-05
C12orf29	-1.64923	2.45081e-05
PTGER4	-1.17516	2.48152e-05
LOC642082	1.03832	2.48152e-05
TIGA1	-1.45504	2.51965e-05
ERN1	1.20515	2.51965e-05
TTC8	-1.24447	2.51965e-05
DPM3	-2.41977	2.51965e-05
DDX17	2.05744	2.5223e-05
ACYP1	-2.4548	2.52345e-05
GMEB2	2.05788	2.55549e-05
LOC390414	-1.00484	2.55549e-05
SEC61B	2.22971	2.56604e-05
MZF1	1.30089	2.57665e-05
CAT	-1.80542	2.59104e-05
LOC136143	-1.91786	2.60229e-05
RNF19A	-2.07262	2.612e-05
LOC653527	-2.02455	2.61251e-05
CHM	1.72934	2.63666e-05
LOC442064	-1.50255	2.67161e-05
ZNF544	-1.28796	2.67911e-05
TCF20	1.27609	2.67911e-05
SEC63	-1.14689	2.68308e-05
C14orf94	-1.16458	2.6835e-05
WDR5	1.31615	2.6835e-05
NAB1	-1.18959	2.6835e-05
LSMD1	-2.89174	2.68567e-05
POLR2I	-1.54804	2.68653e-05
HTR3B	-1.7461	2.69874e-05
FAM26C	1.21289	2.69874e-05
LOC389137	-2.22504	2.73433e-05
GARNL4	1.21921	2.74695e-05
LRSAM1	1.07805	2.7606e-05
SYNGR1	-1.05515	2.76762e-05
CXorf40B	1.49972	2.77668e-05
DLG5	-2.46688	2.7938e-05
MAGED1	3.88184	2.7938e-05
B2M	-1.19958	2.80357e-05
BNIP3L	-1.51589	2.82234e-05
WBP5	-2.77495	2.83952e-05
GUCY1A3	-2.87678	2.84438e-05
TIMM44	1.9345	2.84438e-05
CD276	1.79086	2.84438e-05
PHF10	-2.24825	2.86916e-05
RNF141	-2.04637	2.87747e-05
NGDN	2.10711	2.87884e-05
TLE1	-1.77674	2.88799e-05
RDBP	1.53035	2.89767e-05
TMEM186	-1.23938	2.91524e-05
USP47	-1.42591	2.92307e-05
REEP5	-1.84268	2.95626e-05
LOC728689	1.32829	2.95626e-05
OFD1	-2.06777	2.97441e-05
LOC644250	-2.7508	2.99043e-05
DCAKD	-1.46451	2.99043e-05
TRUB2	-2.93192	3.00111e-05
PRDX2	2.69263	3.0027e-05
CCT6B	-1.86518	3.01133e-05
PAPSS1	-2.21333	3.05108e-05
DDX39	1.32332	3.09924e-05
IER3IP1	-1.7312	3.13229e-05
NACAP1	-3.90849	3.14963e-05
USP6NL	2.20468	3.18325e-05
PNPLA4	-1.32807	3.18325e-05
DSTN	-2.58729	3.18325e-05
ERO1L	1.12105	3.18325e-05
AMY2A	-3.40396	3.18325e-05
ULK1	2.34408	3.18467e-05
ABL1	1.60869	3.19556e-05
CLTC	-1.43676	3.19556e-05
RTTN	2.54844	3.23928e-05
GLT25D1	2.56325	3.24415e-05
EXT2	2.05627	3.26566e-05
C14orf153	2.05522	3.27207e-05
ALG13	-2.36477	3.316e-05
C20orf30	-1.68232	3.316e-05
LOC645968	-3.24308	3.32992e-05
CALML3	-3.48571	3.32992e-05
C12orf30	-1.03436	3.34039e-05
VTA1	-1.26927	3.34793e-05
MAOA	-3.25654	3.34793e-05
HOXB7	2.75896	3.34793e-05
DMC1	2.31063	3.34793e-05
PHF5A	1.73042	3.36106e-05
LOC158345	-1.55668	3.37138e-05
RPL9	1.81039	3.37912e-05
KIAA0101	4.98754	3.37912e-05
FBXL3	-1.88182	3.3841e-05
FRAG1	-1.63015	3.43182e-05
LOC652615	1.24531	3.43626e-05
PDCD7	1.4834	3.4388e-05
ADSS	2.18438	3.44123e-05
MYNN	-1.01764	3.45449e-05
FASTKD5	1.53438	3.45449e-05
RNF149	-2.12733	3.46333e-05
RHOB	-3.56159	3.46333e-05
EIF1AX	-1.92493	3.47202e-05
SCAMP1	-2.24468	3.4985e-05
UCKL1	1.80634	3.52592e-05
KCTD18	-1.03818	3.53297e-05
BRSK1	1.83773	3.53297e-05
PAM	2.9403	3.54365e-05
MORC4	-2.66423	3.5496e-05
CD2BP2	1.63357	3.55691e-05
DENND1C	-1.03128	3.56124e-05
LOC651919	-2.88378	3.56124e-05
HSD17B7	4.48028	3.57834e-05
LGLL338	1.82944	3.61876e-05
ZNF569	-2.51211	3.63498e-05
ARHGEF18	1.69184	3.64083e-05
TCEB3	3.35508	3.64662e-05
IQWD1	-3.33777	3.64952e-05
LCMT1	1.77571	3.65685e-05
CLIC1	5.02748	3.65685e-05
PNPLA8	-2.15533	3.65685e-05
NENF	3.14155	3.66656e-05
MATN2	1.83144	3.67321e-05
ATG10	-1.6887	3.67321e-05
NTN4	-2.63403	3.70302e-05
SLTM	-1.50549	3.70302e-05
ATP5I	-1.49683	3.70302e-05
PLP1	-1.86258	3.74093e-05
CKMT1B	-1.89431	3.75088e-05
ARL4C	-1.19562	3.78402e-05
C20orf117	-1.05189	3.80509e-05
KRTCAP3	-2.53903	3.82476e-05
ADM	4.52302	3.82476e-05
CLTB	2.29454	3.83998e-05
KHDRBS1	2.90814	3.85681e-05
C16orf42	-1.22404	3.88559e-05
UQCRH	-3.85255	3.88559e-05
CDC37	1.8402	3.88559e-05
LOC285016	-2.49354	3.90555e-05
NOL1	3.28752	3.90555e-05
SFRS3	-2.22105	3.90688e-05
FLJ38482	1.35029	3.93571e-05
ZBTB16	-4.06947	3.95185e-05
IL33	-1.57389	3.95589e-05
ZGPAT	-1.01827	3.95922e-05
ZNF69	2.30562	3.97279e-05
SETD6	-2.65645	3.97398e-05
CSTF2	1.60193	4.00119e-05
FXYD3	-1.10066	4.01319e-05
EPHX2	-2.59734	4.01496e-05
DENR	-1.41037	4.08062e-05
UBE2V2	-1.34322	4.12253e-05
LOC651751	-3.04438	4.13775e-05
PRKCQ	2.09789	4.14585e-05
C1orf63	-2.14437	4.14585e-05
ATM	1.1062	4.1787e-05
LOC284988	-1.5647	4.1787e-05
RNASE1	-2.87621	4.1787e-05
TESK1	1.51167	4.1787e-05
BIRC5	1.69699	4.1787e-05
UBE2I	1.71383	4.19551e-05
FAM102B	-1.67112	4.2141e-05
CCNDBP1	-1.82833	4.24929e-05
ARHGAP27	-2.66309	4.28722e-05
ZNF650	1.67177	4.29709e-05
LYSMD3	-2.14863	4.32517e-05
HNRPH1	-2.9058	4.34424e-05
KIAA0423	-1.97983	4.34712e-05
PPCS	-1.48715	4.35687e-05
SLC38A10	1.75393	4.35687e-05
HDHD1A	1.44113	4.35687e-05
REEP4	1.65614	4.36396e-05
ST13	-1.43413	4.44447e-05
NCL	2.38901	4.45648e-05
LOC653499	-1.38122	4.45648e-05
MAP6D1	1.88356	4.45648e-05
AMD1	1.06497	4.50275e-05
PM20D2	-1.7138	4.54953e-05
ARHGAP22	1.41279	4.5811e-05
NUP37	1.56607	4.65734e-05
TSPAN6	-1.55845	4.68709e-05
C20orf127	-3.10371	4.68709e-05
LOC642432	-1.53805	4.68709e-05
FABP7	-3.7069	4.68709e-05
KIAA0100	-2.98988	4.68907e-05
CNOT8	-1.38507	4.76952e-05
CSRP1	-1.31518	4.76952e-05
HAS3	-1.71497	4.80135e-05
UNC84B	3.26543	4.80818e-05
C4orf32	-2.05901	4.84181e-05
ZNF394	1.63003	4.84181e-05
AGGF1	1.21542	4.85323e-05
TMEM189	1.29006	4.87225e-05
ACAT2	-2.62312	4.87225e-05
MPPED2	-2.28045	4.88866e-05
TCTEX1D2	1.98312	4.89333e-05
KCNN4	-3.27901	4.89333e-05
PSRC1	1.86018	4.89333e-05
DNTTIP2	-1.88058	4.9159e-05
JMJD1C	1.82667	4.97296e-05
ZNF280C	1.17152	4.98247e-05
CHMP4C	-2.22268	5.018e-05
ADI1	-4.61748	5.018e-05
HNRPK	3.14692	5.02089e-05
TRIM2	-3.27542	5.07582e-05
ISY1	3.13764	5.07582e-05
LOC643007	-4.76328	5.08156e-05
H2AFY	2.05744	5.097e-05
DYNLRB2	-1.65372	5.11744e-05
LPHN2	-1.93864	5.13751e-05
UBE2L6	1.92568	5.17135e-05
SPOPL	-1.34756	5.17135e-05
RBM10	1.17238	5.17135e-05
POLA2	1.84208	5.24058e-05
MGC3196	1.02721	5.24058e-05
RAB40C	4.19346	5.24786e-05
BOP1	1.92382	5.25208e-05
LOC645351	-2.02827	5.26076e-05
GRB2	1.50621	5.35407e-05
RG9MTD1	-1.80069	5.35823e-05
USP42	3.13201	5.36389e-05
UNQ830	-3.99628	5.38954e-05
CDR2L	2.54663	5.39978e-05
KLHDC1	-1.6211	5.39978e-05
LDLRAD3	-2.08444	5.39978e-05
NAGLU	-1.24429	5.39978e-05
CEP135	1.1451	5.40858e-05
HMGN2	3.99975	5.41088e-05
RPL36	-1.29764	5.41088e-05
BLOC1S1	-1.72671	5.42979e-05
LOC653066	1.36777	5.4461e-05
LOC347376	-3.1836	5.45319e-05
LOC653566	2.14201	5.4584e-05
ATP2B4	1.92351	5.46499e-05
RAVER2	-1.09924	5.47619e-05
LOC127295	-1.66743	5.47619e-05
ZNF140	-2.1347	5.52321e-05
TULP2	-1.03231	5.54595e-05
LRIG3	-1.70521	5.57417e-05
FCHO2	-2.08509	5.58843e-05
IL10	2.00389	5.59492e-05
SAV1	-1.83068	5.59729e-05
C9orf82	-2.17894	5.61147e-05
PTPRZ1	-1.04412	5.61426e-05
GMPPA	2.18581	5.61426e-05
AK5	-1.87916	5.6666e-05
MTRF1L	3.71816	5.6882e-05
ANXA8	-2.20363	5.69931e-05
BRPF1	1.43567	5.73867e-05
GLE1	-1.3144	5.73867e-05
EID2B	1.80954	5.73867e-05
SCYE1	-1.25021	5.73867e-05
ITM2A	-3.9451	5.73867e-05
LOC441461	-1.45289	5.76332e-05
KIAA0652	-1.52493	5.76332e-05
NMI	-1.51033	5.81075e-05
FLNA	-1.65287	5.82389e-05
NGFRAP1	-1.59087	5.82684e-05
CLDN12	-1.47309	5.83233e-05
MOBKL1A	-2.34717	5.86885e-05
TTC26	1.23264	5.86956e-05
ZNF420	-1.44161	5.88092e-05
TSPAN12	-1.15932	5.96593e-05
TSFM	-1.56908	5.98243e-05
ZNF323	-1.87585	6.02849e-05
CENPC1	-1.36507	6.08795e-05
SMAD6	2.56277	6.10529e-05
C1R	1.14728	6.10972e-05
FLJ40504	2.40827	6.10972e-05
USF2	-2.41163	6.18259e-05
ATMIN	-1.21386	6.20977e-05
WDR46	2.069	6.22584e-05
EXOSC2	1.73955	6.32627e-05
CDK5RAP3	1.33174	6.32627e-05
HIST1H1C	-1.16031	6.34223e-05
ARHGEF10	2.45512	6.36809e-05
ZNF91	-2.77813	6.38359e-05
LOC653829	-1.66023	6.38359e-05
LOC647389	-2.1058	6.43968e-05
AQR	-1.03779	6.44837e-05
RPS6KA5	-1.07098	6.46305e-05
HPS6	1.35625	6.47238e-05
LOC388122	-1.85191	6.48054e-05
TRAF3IP1	1.02073	6.48054e-05
HOXC6	2.47898	6.48054e-05
MYOZ3	1.23447	6.51181e-05
FLJ41423	2.27588	6.51292e-05
KLF5	-3.53055	6.54733e-05
PRSS16	-2.37283	6.5771e-05
TMEM71	-2.47263	6.5982e-05
PPL	-2.48183	6.61412e-05
XRCC2	1.69033	6.62886e-05
JUN	2.33309	6.63101e-05
SEC31A	2.53681	6.66593e-05
FAM119A	1.60544	6.755e-05
NDUFB10	-1.65556	6.7694e-05
FLJ41200	-1.95202	6.7694e-05
CAMK2B	-1.4302	6.7694e-05
TTC3	2.31829	6.7694e-05
SLC22A15	1.03158	6.7694e-05
GABARAPL2	-1.89878	6.7694e-05
SAR1A	-1.35512	6.80048e-05
LOC653888	2.68551	6.80964e-05
KIAA1671	-2.04582	6.81641e-05
FAM36A	-1.52202	6.83091e-05
POLR3H	-2.02658	6.91926e-05
HARS2	2.59647	6.91926e-05
HOMEZ	-1.95243	7.01711e-05
RAB3IL1	1.01941	7.02952e-05
TMEM154	-1.14601	7.08393e-05
LOC644338	-2.54615	7.08393e-05
GPX1	2.47117	7.08393e-05
ZNF229	-1.05858	7.09208e-05
TMEM201	-1.06484	7.10486e-05
PER1	-1.54953	7.13616e-05
BLNK	-1.09391	7.14614e-05
FAM122A	-1.3206	7.14614e-05
ORMDL1	-2.02246	7.14614e-05
C9orf23	-2.36604	7.15576e-05
FAM29A	-1.39943	7.2246e-05
LOC642033	1.49934	7.23657e-05
SERTAD2	1.8517	7.27775e-05
LUC7L	1.19782	7.27775e-05
SLC25A42	2.06825	7.30981e-05
FRYL	-1.39133	7.33252e-05
TPM1	2.3545	7.34005e-05
MGC12966	-1.38126	7.34394e-05
MAP1B	1.7254	7.37407e-05
HSD17B8	-2.24396	7.39184e-05
COMMD8	-2.03222	7.63725e-05
KIAA0020	1.83478	7.66806e-05
GOLPH3L	-2.02782	7.69878e-05
PEA15	1.17467	7.70227e-05
LMOD3	-2.78862	7.70673e-05
FCF1	1.28711	7.71094e-05
HMGN3	-1.73938	7.74281e-05
DHFRL1	-1.61555	7.74281e-05
WDR4	1.85837	7.79887e-05
CNTNAP2	1.42158	7.89457e-05
LOC338799	-1.2307	7.92633e-05
RPL7A	-3.93855	7.92709e-05
FAM108A3	-2.42078	7.93464e-05
SUV39H1	2.24041	7.94407e-05
C11orf24	1.04077	7.94407e-05
PHACTR4	1.06753	7.94859e-05
CDK10	1.43159	7.98934e-05
BIRC2	2.17739	8.05364e-05
TTF2	2.00467	8.10781e-05
PSMB6	2.37108	8.1218e-05
TICAM1	-1.29653	8.28853e-05
ARL13B	-1.53653	8.28853e-05
BARD1	2.40784	8.29327e-05
ATPBD1C	-1.36887	8.4027e-05
KIAA2010	1.12264	8.4027e-05
CBLN3	1.42043	8.41791e-05
RBM39	-1.44598	8.45168e-05
SCOC	-1.39449	8.4608e-05
SUV420H2	-1.67615	8.51028e-05
SCYL3	-1.08881	8.51736e-05
ARMC10	2.33904	8.55989e-05
RPL29	2.98929	8.55989e-05
ARSD	-2.0307	8.63269e-05
EPRS	1.124	8.67158e-05
GK2	1.80013	8.67158e-05
ARID3A	1.43636	8.73917e-05
ZNF766	-1.97832	8.76656e-05
KNTC1	1.73164	8.78761e-05
LMBR1L	-1.17508	8.78761e-05
MRTO4	1.66415	8.78761e-05
CDC45L	3.47103	8.78761e-05
POLR3A	1.51972	8.79403e-05
NUDT9	-2.32215	8.87156e-05
SDHALP1	1.09255	8.93337e-05
C13orf27	1.55843	8.95892e-05
MRPS21	1.04695	8.97472e-05
GTF2H1	-1.44018	8.97472e-05
SMARCA4	1.21043	8.97472e-05
EIF3EIP	-1.69818	9.03114e-05
COMMD1	-1.12114	9.08053e-05
SIPA1L1	-2.40112	9.08053e-05
HDHD3	-1.76846	9.15651e-05
CCDC117	-1.16437	9.26472e-05
CCDC44	1.5109	9.33843e-05
DHRS7	-1.10731	9.35113e-05
UVRAG	-1.73613	9.4223e-05
C15orf38	1.64867	9.4859e-05
FBXO28	1.2377	9.62495e-05
AFG3L2	1.95116	9.63167e-05
MOSPD2	-1.40533	9.67104e-05
PLEKHB1	-2.05373	9.69454e-05
CSNK1D	1.55338	9.80669e-05
C9orf58	-4.84475	9.81496e-05
LOC158318	1.16785	9.83989e-05
B3GNT5	-1.38687	0.000100516
LOC652837	-1.11429	0.000100516
PLLP	-1.18565	0.000100719
ALDH3A2	-1.73774	0.000100763
SALL4	1.62649	0.000100784
TGFBR2	3.82653	0.000100873
BCLAF1	1.74	0.000101294
MFSD11	-2.29351	0.000101726
DUSP11	-1.21372	0.000102217
MELK	4.32703	0.000102233
ZNF577	1.17036	0.000102371
KIF4A	1.91248	0.000102371
STX16	2.9215	0.000102371
TRPT1	1.86303	0.00010261
ELOVL5	-2.2188	0.00010275
ETAA1	-1.07087	0.000102875
C15orf29	-2.49223	0.000103982
EFEMP2	1.37495	0.000104036
CXCL16	-3.05899	0.000104736
HLA-E	-1.9221	0.00010481
ZNF330	-1.95034	0.00010481
GPRC5A	1.40379	0.000105228
NPTN	-3.13948	0.000105228
MGST1	-1.52713	0.000105423
ENO1	1.10928	0.000105615
ACTR1A	1.2522	0.000105761
PI4K2B	-1.38967	0.000105908
TTRAP	-1.05302	0.000106385
MED22	2.63255	0.000106715
C14orf45	-1.94337	0.000107201
RCN2	-1.84857	0.000107518
COL4A3BP	1.71605	0.000107518
ITGA11	1.81445	0.000109277
TLR1	-2.08017	0.000109583
KIAA1754	1.35326	0.000109583
WNT5A	1.58032	0.00011008
CD164L2	-1.05245	0.00011008
C1orf135	1.68164	0.00011008
MARS2	-1.21331	0.000110203
SEMA3C	-3.81621	0.00011046
MTRF1	-1.36381	0.000111203
KIAA1618	-1.3659	0.000111387
AS3MT	-1.30743	0.000111387
TIA1	1.28579	0.000111387
LOC645688	-1.25434	0.000111387
BRCC3	1.67065	0.000111387
TBC1D22A	-2.6457	0.000111508
RABGEF1	-1.92284	0.000111508
DCTN4	-1.82444	0.000111806
FAM129A	-1.06587	0.000111874
BTBD14A	2.37829	0.000112097
SMC3	-1.11477	0.0001126
SLC35A5	-1.1428	0.000112681
MORF4L2	1.32165	0.000113237
AUH	-1.34818	0.000113294
HBP1	-1.54899	0.000113405
NXT2	-2.51738	0.000113435
NFIC	-1.18097	0.000113601
PCGF2	-1.80413	0.000113676
C9orf130	-1.78744	0.000113739
UTP14A	1.96376	0.000115287
SH3D19	-1.37373	0.000115372
IL10RB	1.58706	0.000115479
TUBB8	-1.84022	0.00011552
CD302	-1.11298	0.000115564
CREBL2	-1.48011	0.000116074
SNORA65	1.01869	0.000116074
SQSTM1	2.7791	0.000116074
RPA2	2.16098	0.000116074
NCOA6IP	2.05783	0.000116157
ETFB	-1.89016	0.000116354
ISCU	-1.0242	0.000116878
SLC25A33	-1.37597	0.000117193
CCNT2	1.18579	0.000117287
MAP3K4	1.7616	0.000117928
ITGA5	2.2341	0.000118628
MRPL44	-1.31672	0.000118628
RNASEH2B	-2.5773	0.000118628
ZMYND19	1.41632	0.000118987
LOC642443	-1.6655	0.000119268
C16orf53	1.00011	0.000119817
TSPO	2.17656	0.000119883
TMEM49	2.85109	0.000120245
SSRP1	-2.85379	0.000120246
ABCC5	1.81164	0.000120594
DCLRE1C	1.11946	0.000121259
RPL37A	-2.51579	0.000121485
PYGB	-1.75731	0.000122077
CYFIP1	1.13469	0.000122077
YTHDC1	2.03203	0.000123404
ZNF750	-1.52498	0.000123446
ADORA1	1.77937	0.000126008
BACE2	-1.52827	0.000126008
PUS1	-2.94777	0.000126195
C2orf40	-4.33875	0.000126604
C9orf10OS	-1.64279	0.000127047
GLO1	1.21042	0.000127549
ANXA1	-1.53695	0.000127636
CRISPLD1	-1.27983	0.000127636
TWF2	1.0249	0.000128821
RTN3	-1.02595	0.000128821
FLJ22795	1.48247	0.000128821
SCARNA9	-1.5673	0.000128839
ETV5	-2.42971	0.000128987
MRPL23	1.00962	0.000129089
ASCC3	-1.27541	0.000129763
PFDN2	-1.71844	0.000130574
NME5	-1.8427	0.00013114
HNRPUL2	1.52515	0.000131884
FLJ45909	-1.10229	0.000132503
CBX2	1.11457	0.000132689
LOC285176	-1.48361	0.000132811
AHNAK	-2.49475	0.000134626
TYRO3	1.3982	0.000134973
SSBP4	1.21156	0.000134973
TPI1	1.68433	0.000135135
TWSG1	3.12056	0.000136705
SLC39A1	1.63393	0.000136884
PRKAG1	2.68307	0.000137383
CCDC16	1.48419	0.000137819
MCM3	2.6482	0.000137819
RPL12	-1.17798	0.000138189
LIFR	-3.42474	0.000138569
DHRS4	1.52702	0.000138569
CYP4F11	-1.31062	0.000139099
CDK5RAP1	1.99665	0.000139277
IER3	2.10931	0.000140289
PCNX	1.04976	0.000140347
CTSZ	2.37739	0.000140953
LCP2	-1.53448	0.000140953
PIP	-6.3448	0.000141454
FAM20C	1.03498	0.000141454
SQLE	3.35673	0.000141739
CFI	-1.84152	0.000142369
TIAF1	1.48617	0.000142821
DMN	-2.77126	0.000144099
CTR9	-1.44082	0.000144657
LOC648638	-1.31809	0.000145541
INSIG1	1.1538	0.000145558
EIF4EBP2	-2.04472	0.000146101
DDX28	-1.18048	0.000146101
LPAR1	1.63205	0.000146101
NDRG4	1.55591	0.000146101
RYK	1.07541	0.000146198
C20orf19	-1.59356	0.000146379
TMTC3	1.71707	0.000146702
SFXN3	-2.14849	0.000147359
AFMID	-1.52533	0.00014795
MTRR	1.45857	0.000147966
SLC25A4	1.35569	0.000147966
MMP7	-4.64622	0.000148864
KCNJ10	-1.24011	0.000148946
PURA	-1.4673	0.00014952
DCTN6	-1.94494	0.00014952
CSNK1A1L	-1.06875	0.000153759
SPOCK1	2.75303	0.00015399
PTGES3	-1.97023	0.000154531
TPM2	1.30775	0.000154868
DDEF1	1.2668	0.000155273
SARS	-2.89611	0.000156548
THBS1	3.35792	0.000156903
RAD54B	1.08384	0.000157046
CD24	3.1748	0.000157695
DNAJC5	1.42731	0.000158216
FBN2	2.47351	0.000158216
KIAA0329	-1.02359	0.000158963
SERF1B	-2.21774	0.000159292
ESPNL	2.15029	0.000160323
LOC728069	-1.12348	0.000160441
UBE4A	-1.24274	0.000161482
GSTO1	1.009	0.000161482
C1orf86	1.36293	0.000162607
FOXRED2	1.32608	0.000162722
ATG3	-1.39419	0.000163333
C5orf35	-1.7223	0.00016431
LOC134145	-1.28553	0.000164424
JUNB	2.77658	0.000164741
EXOC1	-3.40726	0.000164741
STK40	1.70776	0.000164903
SLAIN1	-1.72332	0.00016517
G3BP1	-4.15526	0.000165343
TSKU	2.31924	0.000165779
PDE6C	-1.01813	0.000166053
LOC653450	1.28393	0.000168032
DTYMK	-1.95648	0.000168432
SLC16A11	-1.2327	0.00016854
C6orf120	-1.0998	0.000168849
KRAS	1.16688	0.000168849
ELF1	-1.23213	0.000168849
DAZAP1	1.36527	0.00016932
RAD21	2.37387	0.000170873
LARP1	-1.2144	0.00017119
LOC91561	-2.24163	0.00017119
DFFA	1.61322	0.000173161
GRAMD1C	-1.56595	0.000173605
COPB2	1.17835	0.000173641
NLRP8	2.09051	0.00017394
XPA	-1.36703	0.000174998
IFIH1	-1.80957	0.000175587
ABCA4	1.05008	0.000175775
LOC647037	-1.16433	0.000175888
ST7OT1	-1.02592	0.000176337
LUZP2	-1.13122	0.000176528
DYNC1LI1	-1.39395	0.000177319
CASP6	-2.60772	0.000177319
TMEM173	2.76309	0.000177609
RAB32	1.84647	0.000177825
LOC727761	2.29057	0.000178456
CMTM4	-1.81486	0.000178647
NPNT	-1.43773	0.000179013
LOC645304	-1.82751	0.00017923
RPS19	-1.09452	0.000179287
LOC728518	-1.11643	0.000179541
CYYR1	-3.12884	0.000180387
KHDRBS3	-1.40817	0.000180421
LOC642333	3.09767	0.000180826
USP25	-1.12927	0.00018167
SLC19A2	-1.23027	0.000182506
ELAVL1	1.15214	0.000184307
NPDC1	-3.08262	0.000185385
C17orf59	-1.92065	0.000185385
MTG1	1.21336	0.000185385
PDPR	-3.37993	0.000187953
TOP3A	1.50399	0.000187988
RPS7	2.59449	0.0001881
MORF4L1	2.43779	0.000188303
JOSD1	-1.07911	0.000188329
MBD1	1.26402	0.000188602
FLJ34047	-1.27776	0.000189001
GLUD1	-1.17283	0.000189001
ZNF708	-1.07624	0.000189006
PEX11G	-1.96782	0.000189006
OXSR1	1.21018	0.000189006
DNAJB1	1.1603	0.000189006
SKI	1.16545	0.000189811
DNAJC12	-2.06177	0.00018997
ABHD3	1.24063	0.000190104
IDE	1.57626	0.000190253
SLC25A32	-1.14789	0.000190755
RACGAP1	1.85081	0.000190834
RNASEH2A	1.33626	0.000191258
KIF1B	-1.22195	0.000192614
PAX7	1.64918	0.000192834
HECTD3	1.27871	0.000192834
TFAP2B	-2.43832	0.000194935
PPFIA3	-1.22306	0.000195051
C17orf56	-1.47171	0.000195422
UBB	1.97869	0.00019566
ST8SIA1	-1.09613	0.000199131
TPR	-1.32951	0.000200028
UCK1	-1.18982	0.000201487
LOC644422	3.02119	0.000201746
BAIAP2L1	1.02439	0.000201843
STX8	-1.19855	0.000202459
FLJ20444	1.05323	0.000202473
SMAP2	1.54866	0.000202588
SRF	1.54366	0.000202588
STXBP5	1.8062	0.000202822
SLC30A1	1.8985	0.000203472
SIAE	-1.98915	0.000204401
COPS8	1.44153	0.000204987
LOC440093	-2.25708	0.000204987
SIGIRR	-1.49152	0.000206899
HSP90B1	1.16601	0.000207442
LOC645508	1.13782	0.000207785
ZNF521	-3.06173	0.000209798
RNF128	-1.03262	0.000210704
PRPS1	1.14613	0.000212177
C6orf106	1.17221	0.000212875
DNAJC9	1.76068	0.000213261
MGC12965	-1.40089	0.000213965
SSH3	-1.38209	0.000213965
RNF217	1.43662	0.000214394
PSTPIP2	-1.4845	0.000214509
VEGFB	-1.49818	0.000214691
LZTFL1	-1.96758	0.000216117
FLJ20628	-1.33876	0.000218046
ALDH4A1	-1.30763	0.000222173
TMEM30A	-1.09571	0.000222173
CDR2	1.41342	0.000222567
CDYL	-1.37157	0.000222933
HELLS	1.30598	0.000223023
PIN1	1.48164	0.000223635
DDHD2	1.03321	0.000224006
LOC644482	-1.87102	0.000224135
PISD	-1.03824	0.000224608
CREM	-1.28171	0.000225014
HSF2	-1.03714	0.000225014
CMIP	1.20324	0.000226834
L3MBTL3	-1.12751	0.000227045
POLR2A	-1.07976	0.000227088
CD59	-1.49016	0.000227878
HS2ST1	-1.61037	0.000227878
MB	-1.12225	0.000227878
ZNF443	2.38245	0.000227878
PVT1	1.73421	0.000227878
SLC7A1	1.19874	0.000229571
RFTN1	1.82671	0.000229585
PHF12	-1.06011	0.000230015
DNMT1	2.07123	0.000232679
GOLGA7	1.96442	0.000232857
TWIST1	1.86496	0.000232983
SNAPC4	1.03452	0.000233071
TBC1D4	-1.58607	0.000233071
LOC645317	-1.91969	0.000233745
ZXDB	-1.12071	0.000234905
C18orf54	1.22459	0.000234905
SUOX	1.64654	0.000235436
PHACS	-2.22412	0.000235636
ULK2	-1.16547	0.000237021
PSMA6	2.46144	0.000238492
TIMELESS	1.79514	0.000239117
ANGPTL4	1.19977	0.000239597
MTHFD1L	2.09468	0.000240328
PSCDBP	-1.60082	0.000243531
VRK3	-2.11048	0.000244514
TRAPPC6A	-1.77251	0.000245311
PIK3AP1	-1.70485	0.000245311
RAB23	2.31101	0.00024561
KATNA1	2.50538	0.00024561
PKN1	-1.70274	0.000245942
NUCB2	-1.36872	0.000245995
ZC3H14	-1.21259	0.000245995
PRRX2	2.20178	0.00024624
TMEM139	-1.44819	0.000246302
TMEM159	-1.60445	0.000246302
TDRD1	-2.23998	0.000247153
FZD7	-1.2727	0.000251056
KIFC1	4.46162	0.00025165
FBXL6	1.2459	0.000256492
PITX1	5.8345	0.000256964
KRT6B	-4.61007	0.000257857
KIAA1751	1.06678	0.000260219
HOMER3	1.49334	0.000260754
ZFYVE21	1.02861	0.000262848
DGAT1	1.17412	0.000263726
MOAP1	-1.25558	0.000264106
USP6	-1.16872	0.000264186
NOLC1	2.71496	0.000266205
PLS3	1.76506	0.000267062
CAMTA1	-1.82594	0.000267062
SRPK2	-1.18981	0.000267087
MGC40489	1.39334	0.000267853
FAT	-1.88007	0.000268258
IRX1	-1.48016	0.000268888
FBXO8	-1.20891	0.000268919
ZNF430	1.62113	0.000268919
ZNF627	1.56212	0.000269618
RAB8B	1.1746	0.000271518
LOC728411	-1.77226	0.000272235
MYO10	-3.03495	0.000276811
HSPCAL3	-1.08598	0.000279711
TUBB	3.47013	0.000280252
DCI	-1.37403	0.000281992
MT1M	-2.28667	0.000284491
FBXL10	-1.2761	0.000284642
LOC729446	-1.69833	0.000285342
MYC	-1.41106	0.000286307
DIMT1L	-1.55828	0.000290698
RHOJ	-1.11136	0.000290698
KIAA1143	-1.13087	0.000293081
SMARCA2	1.84527	0.000294762
SLC25A12	-1.08316	0.000296637
DERL1	1.04484	0.000296681
PRDX6	1.16373	0.000296872
SH3BP5L	1.24725	0.000296872
SLC24A1	-1.26944	0.00029924
PRODH	-1.95833	0.000300501
RPLP0	-3.79031	0.00030115
MRPL54	-1.0398	0.00030115
TFDP1	1.43238	0.00030125
PLXDC1	-1.66415	0.000303525
C14orf125	-1.16051	0.000305412
CIR	-1.67822	0.000309533
NME1	-3.20706	0.000309533
RAI14	2.10694	0.000309533
SSPN	-2.63716	0.00031073
PLAU	2.74183	0.000311971
ARHGEF16	-2.18422	0.000313149
LOC645895	-1.25974	0.000315335
CKMT1A	-1.70963	0.000315335
CDC42BPA	1.04367	0.000316242
PIGA	-2.82358	0.000316633
TFAP2C	-1.70267	0.000316633
NGRN	3.18191	0.000316633
LOC651630	-1.29996	0.000316633
CYP39A1	-1.13188	0.000316887
CKAP4	1.80986	0.000317361
ABHD14A	-1.13565	0.000317665
SC5DL	3.20938	0.000318858
ALDH6A1	-1.85116	0.000319756
PRPF4B	-1.13884	0.000320782
ASS1	-1.74024	0.000321515
GCDH	-1.12115	0.000322109
C19orf48	-3.67391	0.000322167
ZBTB2	-1.24281	0.00032357
REV3L	-1.17375	0.00032357
SRP54	2.3651	0.000324041
SMG1	-1.19623	0.000324041
PDRG1	1.09293	0.000324439
MRPL37	1.31601	0.000325277
ZNRF2	-1.21125	0.000327369
GOLGA8A	-1.12611	0.000328154
ZBP1	1.66803	0.000328232
PLOD1	1.61818	0.000330913
ZCRB1	-1.04503	0.000336466
CAMKK2	-1.46439	0.000336764
C20orf108	-3.73042	0.000336764
RRN3	-2.24324	0.00033997
GPAA1	2.01471	0.000341797
PLOD3	3.91623	0.000341797
SLC12A2	-2.1103	0.000344214
RSU1	2.31304	0.000344214
LOC652541	-1.47874	0.000344214
MACF1	-1.85817	0.000345169
LTBR	1.14707	0.000345636
SEPW1	-1.85189	0.000348133
ZNF219	-1.0836	0.000349269
RPS18	-1.08366	0.0003501
RNF130	-1.00325	0.000350338
ZNF696	2.44847	0.000350664
C17orf58	2.06102	0.00035322
CDC14A	-1.16471	0.000354086
CHURC1	1.47157	0.000354117
RASA1	-1.32325	0.000354397
FAM58A	1.09006	0.000354397
TAF2	1.50178	0.000356773
PLAUR	2.38571	0.000357507
MTR	-1.51223	0.000357781
NUP85	1.46184	0.000358498
PARD6G	-1.07394	0.000358498
LOC400759	-1.23675	0.000359307
WAC	-3.5469	0.000359635
MIB2	-1.48161	0.000360095
RAB28	-1.01337	0.000361267
SDF4	-1.53505	0.000362691
SURF4	1.41374	0.000366227
CDCA5	3.30899	0.000367815
IDH1	1.24233	0.000369186
NPAT	-1.30328	0.000369186
CCDC82	-1.06231	0.000369186
DGKD	-1.02874	0.000371854
DPYD	-1.55259	0.000372264
IHPK1	-1.30416	0.000372264
CCDC128	-1.49614	0.000374685
INTS8	-1.22188	0.000374685
LYPLAL1	1.26434	0.000374898
LOC648176	-1.02568	0.000377044
P2RY11	1.04633	0.000379583
IQGAP1	-2.44454	0.000381723
TESC	-2.89318	0.000381723
HIGD2A	-1.28959	0.00038199
TMEM4	-1.72948	0.000382344
CARD11	1.05076	0.000386213
LAPTM4A	-2.45841	0.000386317
SMARCE1	-1.18282	0.000387207
CALU	1.40394	0.000387207
LOC648399	-1.90551	0.000388833
TRPV4	-1.25719	0.000388833
POLG	-1.30613	0.000389604
BAT1	-5.19639	0.000389628
STAC2	-3.20605	0.000390178
PITPNB	-2.29173	0.000392473
SIRT1	-1.44726	0.000392473
DTX2	1.15347	0.000392975
WBP4	-1.0407	0.000393296
SEMA5A	-1.813	0.000393296
LYPD3	-1.55508	0.000393296
RIC8B	-2.02083	0.000394897
HNRPM	4.0313	0.000394897
ZBTB8	1.43801	0.000395072
ROCK1	-2.44023	0.000395324
RAB15	-1.25317	0.000395758
MBNL2	-3.72138	0.000396449
FBXO27	-1.49515	0.000400571
RMI1	1.40953	0.000402792
SLC28A3	-1.40706	0.000402792
C16orf59	1.48492	0.000403398
BANF1	2.84835	0.000403633
ALDH16A1	-1.33872	0.000403752
NPM3	3.75402	0.000403819
OTUD5	-1.40753	0.000403819
ARID5B	-1.51224	0.000404053
C14orf106	-1.2466	0.000404639
RPSA	-2.20083	0.000405087
ACACA	1.08616	0.000405642
OMA1	-1.33248	0.000405642
RASGRP1	-1.14837	0.000405642
APPBP2	1.2207	0.000405642
BBC3	-1.10755	0.000406073
MEOX2	-1.13774	0.000407351
FOXO4	-1.70221	0.000407351
SLC2A1	3.89075	0.000408964
C4orf14	-1.47216	0.000409766
EXOC4	-1.80553	0.000410282
DHX37	2.10717	0.000411568
POFUT2	1.89683	0.000411952
PTTG1IP	1.90016	0.000411952
RSF1	-1.48501	0.000413071
TSPAN17	1.56373	0.000413203
GDI2	-1.44844	0.000414047
POLE2	1.70831	0.000414147
MPHOSPH1	1.01987	0.000415709
TMEM185A	1.18703	0.000415794
UBE2L3	1.42883	0.000417174
CAPZA1	-1.2718	0.000418264
PPM2C	-2.33827	0.000421309
YIPF4	-1.81924	0.000422853
NT5DC1	-2.06592	0.00042299
RCCD1	-1.6641	0.000423313
CYP2J2	-2.08732	0.000423313
PLK1	1.86236	0.000424171
SLC2A3	1.86496	0.000426915
TIAM1	1.07448	0.000426928
GLOD4	-1.07617	0.000427315
GUSBL1	-1.31328	0.000427315
FLJ10081	-2.06601	0.000428327
LOC654096	-2.23379	0.000428568
ZC3H8	-1.58989	0.000428568
CLIP1	1.03243	0.000429698
ZFP36L1	-2.22104	0.000430037
PLDN	1.36345	0.000430399
VSIG2	-1.29091	0.000430399
MGST2	-1.24272	0.000430767
GSK3B	1.741	0.000430767
MSH2	-1.45628	0.000431371
EGR2	-2.09945	0.000436415
ALG5	-1.22613	0.000439516
DIS3L	-1.08411	0.000442062
IVNS1ABP	-3.69598	0.000442062
HOXC13	1.57455	0.000443391
KLHL13	-1.70386	0.000444203
SSBP2	-1.48443	0.000451248
XPO4	-1.35526	0.000451609
C9orf16	-1.07141	0.000453296
NFYC	-1.06992	0.000454042
CPEB3	-1.62142	0.000454227
SDPR	-2.26417	0.000454227
CAND1	-1.72969	0.000455866
GNPDA2	-1.52845	0.000455866
PDK4	-3.84542	0.000455866
CENTA1	2.62061	0.00045605
SDC4	-2.18926	0.00045605
HMOX1	1.67375	0.000456353
PIGV	-1.94842	0.000457287
ESD	-2.55669	0.0004576
HBEGF	1.91049	0.000458446
LOC650321	-1.6227	0.000458446
NEK3	-1.24105	0.000458965
TMEM14A	1.23926	0.000461186
TXNL1	-3.04581	0.000461186
ORAOV1	1.32126	0.000462684
FDX1L	1.43172	0.00046308
TTC32	-1.27755	0.00046969
CASP3	-2.39445	0.000470554
TSC22D2	1.4073	0.000470664
SRXN1	1.8819	0.000474993
ZMAT5	1.19172	0.000477208
PLD3	-1.017	0.000477208
LOC400304	-2.33558	0.000477208
LOC652489	1.67576	0.000478132
A4GALT	1.1122	0.000478284
STOM	2.55676	0.000480721
C11orf68	-1.1539	0.000480721
CYP51A1	-3.10008	0.000480721
ALPP	-2.05428	0.000480916
MTERFD1	1.15508	0.000483274
IL4R	-1.41816	0.000483274
PEX11A	-1.48023	0.000483573
ERICH1	1.67097	0.00048698
UBQLN1	1.51791	0.000492725
CPVL	1.15345	0.000492816
ARMCX5	-1.28678	0.000492943
CDK2	2.90965	0.000493641
GM2A	-3.05319	0.000493641
SEC22C	1.72142	0.000494162
LOC730740	-1.19687	0.000494162
FLJ36848	-2.5369	0.000495577
C1orf163	1.21076	0.000507449
MGC4677	1.45951	0.000509035
SLC35A4	1.23365	0.000511099
AP1S2	2.39033	0.000518525
LOC153364	-1.07095	0.000518663
TCEAL7	-1.40091	0.000523352
USP49	-2.70104	0.000525508
C11orf75	-1.06652	0.000529823
HBB	-2.67607	0.000531501
ACSL1	-2.41178	0.000532107
LOC654074	-1.48135	0.000533523
NEO1	-1.45222	0.000534065
RANBP9	-1.72997	0.000534065
FAM62B	4.22397	0.000534135
NAP1L4	1.21938	0.000537864
DNM2	1.0069	0.000537864
CGNL1	-2.44004	0.00054267
SLC26A2	-2.21175	0.000544146
RKHD1	-1.07504	0.000548557
LMBRD1	-1.34878	0.000554421
PHYHD1	-2.25669	0.000555962
PCYOX1L	-1.47864	0.000558763
EIF1AD	-1.13216	0.000561285
ATP5O	-1.51967	0.000561285
FNTB	1.32815	0.000561285
KIAA0564	-1.05469	0.000564466
LOC151579	3.38985	0.000566307
HSD17B6	1.69687	0.000567753
NSUN6	-1.367	0.000571526
IQCG	-1.38456	0.000572935
PDIA4	-1.78362	0.000574344
PCF11	-1.27553	0.000576003
EPHB1	-1.44634	0.000576003
FZD10	-2.05134	0.000576581
UBXD2	-1.15034	0.000580529
BPGM	-1.2335	0.000580744
CCDC28B	1.4048	0.000581965
PDCD10	1.50617	0.000585685
DMKN	-1.15183	0.000586206
RPS27A	-1.14489	0.000587353
GALNT7	-1.27239	0.000588886
POLE	-1.24853	0.000589318
TMEM61	-1.22179	0.00059074
PPM1D	-1.03754	0.000590962
GLMN	-1.11109	0.000591004
ARL6IP5	-2.30797	0.000592962
ARFGAP3	-1.37329	0.000598241
C16orf70	1.16728	0.000600458
KCTD21	1.65548	0.000600458
MUSK	2.04784	0.000600759
TNFAIP8L1	1.46591	0.000600759
DYNLT3	-1.67797	0.000606292
ARPC5	-1.23851	0.000606579
C10orf59	-1.2273	0.000606871
CCBE1	1.19021	0.000609923
LOC440354	-1.71688	0.000609952
FAM120A	1.48065	0.000609952
EIF4H	2.60381	0.000610048
CCDC113	-1.4581	0.000611341
TMEM141	-1.01542	0.000618418
MAP3K7IP2	-1.12602	0.000618488
RPL23A	-1.46723	0.000618488
FHIT	-1.14415	0.000621046
RBBP7	-1.76809	0.000621378
SFPQ	-2.55492	0.00062267
LOC648695	1.95787	0.00062267
DUSP22	1.29613	0.000623407
RQCD1	3.10695	0.00063128
KIAA0408	-1.36302	0.000635068
GDF15	1.02661	0.000635068
LOC646897	-1.5199	0.000636126
ENPP5	-2.21036	0.000636858
SPTAN1	-1.3542	0.000638036
SMG7	2.07411	0.000642252
NEFH	1.9349	0.000643042
DYNLL2	1.14036	0.000643204
C10orf58	2.05589	0.000644544
VEZT	-1.01535	0.000645355
LOC90379	1.32686	0.000646745
CCT6AP1	1.99909	0.000649379
ZNF595	-1.06479	0.000654561
GADD45GIP1	-1.42487	0.000655744
HIST2H2BE	-1.9109	0.000656003
FCAR	1.41559	0.000660327
KIAA1279	-1.24179	0.000660327
TXNDC9	-1.57099	0.000660327
BAPX1	1.16354	0.000661912
RAG1AP1	-1.43211	0.000664743
ZDHHC23	-1.76956	0.000670641
RPS26L	-1.46865	0.000674235
REL	-1.0108	0.000679205
TEAD4	1.4675	0.000680195
DSC2	-3.751	0.000680367
METTL1	-1.00552	0.000683157
PRKRA	-1.29341	0.000683932
ZNF213	1.05039	0.000683932
H3F3B	-2.35622	0.000686047
MTMR9	1.31166	0.000686259
TNFRSF1B	-1.69289	0.000687821
PWP1	1.1039	0.000690642
RPL37	-1.43251	0.000694093
FXR2	1.34444	0.000694093
PPM1G	2.1668	0.000696269
SKAP1	-2.12332	0.000697149
GKAP1	-1.12363	0.000698891
LRRC8A	1.29199	0.000699555
SETDB2	-1.8292	0.000700151
UCK2	1.18194	0.00070234
LOC402251	-2.13492	0.000703325
ERGIC2	-1.8966	0.000709269
DDX27	-1.14257	0.000709315
HTR2A	2.24439	0.000709673
PTPLAD2	-2.45667	0.000713844
RPA1	1.21856	0.00071678
CCM2	2.24942	0.000717612
HEATR6	1.20536	0.000721939
SLC39A3	1.52098	0.000723307
PPWD1	1.48649	0.00072428
YY1	-1.73537	0.00072428
C14orf4	2.65898	0.000725281
DPAGT1	2.82444	0.00072718
DNAJC1	-1.09157	0.000727289
USP21	-1.64949	0.000729622
STOML2	1.30318	0.000729709
ZNF83	-2.28832	0.000734397
RNF113A	-1.03164	0.000738535
ARS2	1.38019	0.000738535
LOC54103	-1.08696	0.000740521
AKAP7	-1.20964	0.000740768
PLEKHB2	1.36842	0.000743457
TRMT6	-1.66457	0.000744288
LOC727726	1.12895	0.000744987
BNC2	1.40083	0.000748702
ASCC3L1	-1.63607	0.000748702
CCDC138	1.26488	0.000752541
RCOR2	1.25373	0.000753996
MGC3731	1.04563	0.000754061
LUZP1	2.50084	0.000762563
MIZF	1.13738	0.000764649
ISG20	-2.28043	0.000764807
OSMR	1.38012	0.000764883
LTA4H	-1.01254	0.000765481
MAPKAPK3	1.06983	0.000765965
RPL13	1.90615	0.000765965
SLFN12	-1.48552	0.000769658
SYPL1	2.18393	0.000772349
GHR	-3.37066	0.000775072
RGS4	1.97968	0.00077508
HEATR2	-2.13602	0.000778128
APCDD1	-2.24211	0.000778128
HOMER2	-1.45854	0.000780183
THUMPD1	-1.0266	0.000786576
PHF2	1.01231	0.000788552
POLR3F	-1.25944	0.000789279
SNX27	1.17214	0.000790641
RRS1	2.31514	0.000790641
C17orf90	2.03283	0.000793213
HOXD12	1.26347	0.000794751
ASF1B	1.79168	0.000800849
LAD1	-1.38842	0.000801412
TAP1	1.01892	0.000803238
PIGX	-2.34118	0.000803238
NUDT8	-2.07109	0.00080397
SUFU	-1.28156	0.000806974
PEBP1	-2.18695	0.000812011
LOC85390	1.23614	0.000812052
NAP1L1	-1.29383	0.000812052
CASD1	-1.4149	0.000824421
E2F2	2.13087	0.000826695
MOS	-1.28097	0.000830431
COX7B	-1.49976	0.00083121
ZCCHC8	1.90476	0.00083121
TNPO2	1.37665	0.000835454
CBFA2T2	-1.21244	0.000837431
BTF3L4	1.93225	0.000839732
MPHOSPH10	-1.29157	0.000842488
IFT88	-1.02892	0.000842488
C4orf7	-1.77953	0.000842488
CISD1	1.30574	0.000845732
SFRP1	-5.15432	0.000849788
PIP3-E	-1.29876	0.000849788
NOD1	1.01167	0.000850079
YPEL5	-1.52422	0.000851462
CD27	-1.35899	0.000852543
C9orf32	2.03234	0.000854087
LOC654103	-1.28568	0.000854106
LRRN2	1.13929	0.000868728
GSTT2	1.80709	0.000875246
PNPLA2	-1.18511	0.000882707
UBC	1.26831	0.00088541
ACTR3	-1.9517	0.000888265
ZCWPW1	-1.44042	0.000889221
MAF1	1.42673	0.000890979
PERP	-4.93697	0.000891213
DIP2B	1.14378	0.000892558
SLC10A3	1.24817	0.000892587
SHANK2	-1.21954	0.000895244
SNX26	1.30545	0.000895244
SLC20A2	1.66697	0.000895244
ELOVL6	1.11609	0.000897584
AURKA	3.22009	0.000906928
CPLX1	-1.23079	0.000906928
TROVE2	-1.043	0.000906928
SATB2	1.14171	0.000907133
NPEPPS	1.37361	0.00090905
ATP6V0E1	1.21262	0.000911478
PLK4	2.37635	0.000911499
LOC283345	1.01309	0.000914095
C17orf53	1.87828	0.000914991
TMEM133	-1.05069	0.000914991
ADAM17	1.04678	0.000915165
ARRDC1	-1.9309	0.000922651
LYST	-1.05735	0.000922651
EPS15L1	1.01861	0.000922651
AP1M2	-1.23106	0.000924476
RPN2	-1.50071	0.000924795
CKS1B	1.36493	0.000924795
PGD	1.26891	0.000925738
MRPS18C	-1.36198	0.000930881
SNORA10	1.70269	0.000932676
MKL2	-2.45845	0.000933747
BTN3A1	1.12402	0.00093597
PPP1CA	1.79415	0.00093729
TUBD1	-1.65963	0.000939803
PAK3	-2.12749	0.000939803
SH3BGRL	-4.36322	0.000954844
TLK1	-1.50348	0.000954844
C7orf28B	-1.54567	0.000961393
SETD3	-1.13254	0.000964986
PCMTD1	-2.65298	0.000971317
AZGP1	-4.90623	0.000971528
VPS45	1.31497	0.000981698
SF3B1	-1.42748	0.000983457
C22orf32	-1.27118	0.000988853
TNPO3	1.40021	0.000989758
BDKRB1	1.45336	0.000998576
PTGES	-1.14348	0.000999305
NUP43	1.7028	0.000999781
C12orf57	-1.53492	0.00100364
ZC3H7A	-1.12588	0.00100486
NIPSNAP3A	-1.20134	0.0010084
RBP7	-1.93682	0.00101221
TMEM66	-1.48297	0.00101221
RBM4	1.07516	0.00101287
FADS3	-1.22435	0.00101428
RUVBL1	1.00877	0.00102252
C8orf33	1.29481	0.00102673
RAXL1	-1.33397	0.00102907
SAT2	-1.90241	0.00103325
SNHG3-RCC1	2.69423	0.00103393
KIAA1274	-1.22266	0.00104657
FHL2	-1.64569	0.0010481
SREBF2	-1.86961	0.00105644
ZNF512	-1.76727	0.00105697
XYLT1	2.59935	0.00105884
SPRY2	-1.40759	0.00106175
RGL2	-2.74168	0.00106269
EIF3A	-2.33615	0.00106392
ZNF600	-1.17316	0.00107036
MC1R	1.48328	0.00107938
LOC648509	-1.59099	0.00108077
C7orf43	1.12266	0.0010819
SUDS3	-1.19336	0.00108581
ACSS2	1.14634	0.00108876
SYNJ2	-1.04435	0.0010897
SIRT2	-1.19344	0.00108988
AZIN1	4.09628	0.00109033
MCFD2	-1.0964	0.00109301
CADM4	-1.06736	0.0010951
CACHD1	-2.06715	0.00110604
HOXC8	2.29369	0.00111169
INTS1	1.85902	0.00111283
ACTN1	1.02886	0.00111641
SOX4	-2.05036	0.00111641
GPR81	-2.0737	0.00111811
PPP1R14A	-2.11172	0.00111966
POLE3	1.29269	0.00112223
MED30	1.34754	0.00112223
NGFR	-1.15692	0.00112245
AGTR1	-1.15952	0.00112322
FHL3	1.19774	0.00112977
KIAA0090	1.06104	0.00112984
MRPL19	-2.80217	0.00113095
RRM1	1.27405	0.00114431
DDX19A	1.14507	0.00114625
RAB30	1.55922	0.00114995
PTPN1	1.12576	0.00115004
ARRDC3	-3.15997	0.00115047
TMEM93	-3.18112	0.00115047
MCRS1	3.15049	0.00115803
PPAP2B	2.2368	0.00116901
CDV3	2.0833	0.00118276
SUB1	-2.04104	0.00118356
LOC643882	-1.68311	0.00119263
CNTFR	-1.54997	0.0011958
ENTPD6	1.03989	0.00119879
APM-1	-1.76608	0.00121429
TYK2	1.28318	0.0012194
PPM1E	1.51794	0.00122163
TP53BP1	1.19893	0.00122176
DHRS7B	-1.063	0.00122506
MCTS1	-2.196	0.00122598
APEG1	-1.23261	0.00123018
LOC441087	-1.13271	0.00123094
TRIM25	2.32451	0.00123094
FRG1	-2.15114	0.00123231
ZDHHC3	-1.1221	0.00123839
BIRC3	-2.86181	0.00124305
CCDC50	1.2031	0.0012448
KIAA0831	-1.2118	0.00125623
FAM59A	-1.00366	0.00125646
RGS10	-1.07256	0.00126636
ZNF561	-1.14566	0.00126714
APLP2	-2.02268	0.00127966
DLST	1.51812	0.00128383
EVI2B	-1.27743	0.00129684
ADA	1.24347	0.00129684
C6orf211	1.07362	0.00129684
MARVELD2	-2.37859	0.00129792
C14orf147	-1.55697	0.00129859
RIMS3	-1.14544	0.00130116
C3	-2.00842	0.00130127
LOC645737	-1.06839	0.00130437
PYGO2	-1.15004	0.00130563
PIGO	1.00935	0.00131076
NME6	1.40779	0.00131076
CEP27	-1.59162	0.00131076
SERTAD3	1.45864	0.00131266
PIK3C3	-1.7027	0.00131901
PTPLA	2.14083	0.0013348
SLC36A1	-1.14677	0.00133825
BST2	1.93442	0.00134467
GSTA4	-1.69351	0.00135481
PPIL1	1.57457	0.00135608
LATS2	1.053	0.00135777
FLJ10986	-1.7902	0.00136283
CDK8	1.56813	0.00136816
SOX11	1.46401	0.0013744
FABP4	-3.23116	0.0013745
AK3L1	1.0718	0.00137987
RBP1	-1.06079	0.00138341
FLJ20718	-1.08627	0.00138403
WDR51B	-1.4965	0.00139135
ZNF12	-1.39426	0.0013914
AHCYL2	-1.05848	0.00139206
NTF5	-1.09068	0.00139371
GJA1	-1.70919	0.00139884
PAFAH1B3	1.88535	0.00140467
CREB3L4	-1.64085	0.00141397
DECR1	-1.34532	0.00142143
LOC653778	-1.77836	0.00142643
GPIHBP1	-1.33423	0.00142832
LYRM1	-1.15405	0.00143197
NSMCE2	1.09614	0.00143441
C12orf32	1.1719	0.00143615
MRPL48	-1.31958	0.00144127
PCDHB4	-1.39729	0.00144324
TMEM59	-1.4006	0.00144533
RECQL4	1.96472	0.00144606
SHMT2	1.02871	0.00144967
KIAA0586	1.00872	0.00145078
LTF	-2.64154	0.00145661
LOC285900	-1.07328	0.0014735
CCDC21	1.60374	0.00147862
TFCP2L1	-2.54502	0.00147862
TMED4	1.69444	0.00149069
CCDC86	3.52214	0.00151507
UBE1DC1	-1.26499	0.00152957
PGAM5	1.72471	0.00153476
LOC644131	-1.90761	0.00153676
DDX31	1.20154	0.00153918
LOC644642	-1.67753	0.00154451
TRIM6	1.18126	0.00154858
BTG1	-2.24787	0.00154858
LRP2	-1.70745	0.00154858
TPST2	1.81691	0.00154858
ABI3BP	-1.46975	0.00154923
TOX4	-1.73037	0.00155683
FLJ10213	1.62697	0.00155786
LOC143543	-1.63522	0.00155887
LOH11CR2A	-1.33219	0.00156246
MLLT10	1.4095	0.00157555
DOLPP1	1.61669	0.00157935
ARHGAP30	1.06228	0.00158067
TMEM9B	-1.21075	0.00158339
NAT10	1.58807	0.00158394
C14orf80	1.85667	0.00158434
C1orf64	-1.81941	0.00158742
RPP21	1.37094	0.00159159
TUBG1	2.0035	0.00159601
HOXA5	-2.60274	0.00160042
KIF2C	2.94242	0.00161721
CHD1	-1.22972	0.0016207
TMEM14B	-1.30897	0.00162363
NUDCD2	-1.74564	0.00163094
ZMAT3	1.77661	0.00164267
LOC440704	-2.24602	0.00164852
[truncated: 1,146 more rows]
