# Supplementary material for: AI-Driven Drug Discovery for Breast Cancer Based on ERBB2 Identified Through Network Pharmacology and GEO Data Analysis
Source: Research Square preprint supplement (doi:10.21203/rs.3.rs-6047847/v1), 2025-02-26
Supplement: Supplementary file 5 [file 68ea14b370f984a5567043fb.xlsx]

## Sheet: ADMET
S12.ADMET Evaluation of Properties
smiles	molecule_chembl_id	IC50	units	pIC50	molecular_weight	n_hba	n_hbd	logp	ro5_fulfilled	molecular_weight	logP	hydrogen_bond_acceptors	hydrogen_bond_donors	Lipinski	QED	stereo_centers	tpsa	AMES	BBB_Martins	Bioavailability_Ma	CYP1A2_Veith	CYP2C19_Veith	CYP2C9_Substrate_CarbonMangels	CYP2C9_Veith	CYP2D6_Substrate_CarbonMangels	CYP2D6_Veith	CYP3A4_Substrate_CarbonMangels	CYP3A4_Veith	Carcinogens_Lagunin	ClinTox	DILI	HIA_Hou	NR-AR-LBD	NR-AR	NR-AhR	NR-Aromatase	NR-ER-LBD	NR-ER	NR-PPAR-gamma	PAMPA_NCATS	Pgp_Broccatelli	SR-ARE	SR-ATAD5	SR-HSE	SR-MMP	SR-p53	Skin_Reaction	hERG	Caco2_Wang
Cc1ccc(NC(=O)c2ccc(CN3CCN(C)CC3)cc2)cc1Nc1nccc(-c2cccnc2)n1	CHEMBL941	0.06	nM	10.2218	493.259	7	2	4.59032	TRUE	493.615	4.59032	7	2	4	0.389416	0	86.28	0.278614	0.597829	0.851244	0.169957	0.220763	0.422543	0.178614	0.304808	0.398256	0.791338	0.857186	0.453896	0.898539	0.928219	0.992016	0.0104626	0.0148938	0.249789	0.0628864	0.00904413	0.0322163	0.00876168	0.873716	0.732043	0.267581	0.0105308	0.0390422	0.201939	0.0713463	0.263024	0.965251	-5.24419
N#Cc1c(NC(=O)CNc2n[nH]c3ncccc23)sc2c1CCCC2	CHEMBL5221067	0.14	nM	9.85387	352.111	6	3	2.82048	TRUE	352.423	2.82048	6	3	4	0.669246	0	106.49	0.341878	0.767037	0.814905	0.806809	0.732399	0.391613	0.795918	0.272123	0.195648	0.61535	0.709711	0.146667	0.251405	0.927537	0.99947	0.0507063	0.0253042	0.564144	0.241933	0.0598053	0.18911	0.117703	0.91374	0.398682	0.493863	0.427671	0.103817	0.872334	0.748916	0.414132	0.709294	-5.45374
CN1CCN(CCC#CC(=O)Nc2cc3c(Nc4ccc(F)c(Br)c4)ncnc3cn2)CC1	CHEMBL437890	0.5	nM	9.30103	511.113	7	2	3.2494	TRUE	512.387	3.2494	7	2	3	0.508069	0	86.28	0.447263	0.816272	0.814602	0.347799	0.302637	0.36268	0.245523	0.380269	0.292386	0.544619	0.815415	0.333061	0.933217	0.951777	0.986815	0.0364394	0.0270704	0.363135	0.0404895	0.017648	0.0566376	0.0563173	0.847665	0.582131	0.390626	0.087312	0.0495454	0.123017	0.270714	0.242419	0.913548	-4.92768
CN1CCN(CCC#CC(=O)Nc2cc3c(Nc4ccc(F)c(Cl)c4)ncnc3cn2)CC1	CHEMBL203599	0.7	nM	9.1549	467.164	7	2	3.1403	TRUE	467.936	3.1403	7	2	4	0.55732	0	86.28	0.485189	0.768524	0.766002	0.355406	0.366757	0.322788	0.281029	0.36329	0.339892	0.584451	0.835239	0.309823	0.94502	0.948908	0.987764	0.0361635	0.0236454	0.415953	0.0757616	0.0483808	0.0724351	0.095418	0.86288	0.584727	0.471232	0.103649	0.067553	0.154399	0.289319	0.264176	0.886059	-4.8674
O=C(C#CCCN1CCOCC1)Nc1cc2c(Nc3ccc(F)c(Br)c3)ncnc2cn1	CHEMBL204638	0.7	nM	9.1549	498.082	7	2	3.3342	TRUE	499.344	3.3342	7	2	4	0.520743	0	92.27	0.485368	0.760824	0.867614	0.391963	0.436229	0.234285	0.488374	0.223338	0.159149	0.488485	0.85018	0.210483	0.888782	0.969214	0.994203	0.0417397	0.0210369	0.583034	0.153984	0.0476733	0.088153	0.18938	0.831821	0.626881	0.655281	0.312302	0.214103	0.44018	0.678833	0.253035	0.859786	-4.70058
O=C(C#CCCN1CCOCC1)Nc1cc2c(Nc3ccc(F)c(Cl)c3)ncnc2cn1	CHEMBL203661	0.8	nM	9.09691	454.132	7	2	3.2251	TRUE	454.893	3.2251	7	2	4	0.571642	0	92.27	0.494431	0.70382	0.847953	0.391004	0.446262	0.212576	0.506324	0.225378	0.165594	0.517524	0.847012	0.174723	0.901805	0.972141	0.995366	0.041723	0.0178729	0.609542	0.254592	0.0970057	0.106345	0.274548	0.851586	0.599182	0.721258	0.347242	0.245618	0.465039	0.680965	0.280536	0.824056	-4.68353
CN1CCN(CCOc2n[nH]c3ncnc(Nc4ccc(OCc5ccccn5)c(Cl)c4)c23)CC1	CHEMBL258282	1	nM	9	494.195	9	2	3.3501	TRUE	494.987	3.3501	9	2	4	0.362128	0	104.32	0.330681	0.642368	0.838098	0.434661	0.402091	0.220193	0.161371	0.429332	0.537799	0.72189	0.825966	0.283095	0.843565	0.907002	0.991847	0.00892123	0.0173828	0.363552	0.057907	0.0298457	0.0672698	0.0127712	0.781857	0.486101	0.355978	0.0279847	0.0308276	0.116982	0.17902	0.289282	0.907624	-5.55521
OC[C@H](Nc1cnc(-c2cc(Cl)ccc2O)c(-c2ccc3cnccc3c2)c1)c1ccccc1	CHEMBL4067871	1	nM	9	467.14	5	3	6.4683	TRUE	467.956	6.4683	5	3	3	0.266579	1	78.27	0.270205	0.121147	0.694366	0.819637	0.897564	0.36733	0.840686	0.317161	0.469605	0.598814	0.759413	0.316218	0.116805	0.855654	0.999543	0.0151912	0.00540272	0.717644	0.542385	0.0769942	0.163359	0.170611	0.63597	0.860949	0.763036	0.0231556	0.579561	0.914161	0.566949	0.371329	0.910295	-5.59199
Cc1n[nH]c2ccc(-c3cc(N[C@@H](CO)c4ccccc4)cnc3-c3cc(Cl)ccc3O)cc12	CHEMBL4105329	1	nM	9	470.151	5	4	6.10482	TRUE	470.96	6.10482	5	4	3	0.240199	1	94.06	0.222058	0.12699	0.768028	0.776666	0.895528	0.46982	0.86835	0.401193	0.35983	0.728989	0.784405	0.432255	0.169744	0.863216	0.99965	0.00926303	0.00497558	0.718293	0.342915	0.0489125	0.126066	0.0929688	0.624277	0.873386	0.605287	0.0309289	0.376334	0.926166	0.488466	0.232537	0.920857	-5.92867
Cc1n[nH]c2ccc(-c3cc(N[C@@H](CO)c4ccccc4)cnc3-c3ccc(F)cc3O)cc12	CHEMBL4075917	1	nM	9	454.181	5	4	5.59052	TRUE	454.505	5.59052	5	4	3	0.268333	1	94.06	0.379097	0.163424	0.80108	0.718165	0.870031	0.540721	0.832876	0.403353	0.288442	0.647842	0.835173	0.461219	0.220746	0.898227	0.999521	0.011094	0.00721823	0.637677	0.30345	0.0311374	0.087753	0.0502223	0.557597	0.906416	0.484101	0.0447352	0.159703	0.886161	0.291784	0.162236	0.952397	-5.74278
C[C@H](CN(C)C)Oc1cccc2ncnc(Nc3ccc(OCc4cnccn4)c(Cl)c3)c12	CHEMBL483332	1	nM	9	464.173	8	1	4.7247	TRUE	464.957	4.7247	8	1	4	0.380407	1	85.29	0.585702	0.590579	0.924291	0.711205	0.447705	0.301214	0.12845	0.371071	0.506736	0.788782	0.961491	0.361402	0.710286	0.906048	0.996602	0.0104676	0.0184926	0.558117	0.491351	0.0395179	0.0646566	0.0374823	0.866501	0.750854	0.505247	0.0535171	0.124892	0.196104	0.144689	0.205586	0.937107	-5.20273
Cc1cc(Nc2ncnc3cc(O)c(NC(=O)/C=C/[C@H]4CCCN4C)cc23)ccc1Oc1cc2nccn2cn1	CHEMBL5176920	1.06	nM	8.97469	536.228	10	3	4.81132	TRUE	536.596	4.81132	10	3	3	0.198115	1	129.8	0.619364	0.304005	0.69767	0.126058	0.200761	0.313816	0.179416	0.205319	0.233207	0.760793	0.592266	0.203983	0.635904	0.942963	0.986529	0.0140618	0.0123244	0.336606	0.0941372	0.0529638	0.149794	0.0179258	0.676806	0.768802	0.493515	0.16586	0.144743	0.297767	0.495512	0.155466	0.891439	-5.74435
CC#CC(=O)Nc1cc2c(Nc3ccc(F)c(Cl)c3)ncnc2cn1	CHEMBL203644	1.1	nM	8.95861	355.064	5	2	3.5227	TRUE	355.76	3.5227	5	2	4	0.702559	0	79.8	0.529457	0.728666	0.901254	0.863758	0.468343	0.335171	0.404238	0.160124	0.161029	0.585897	0.723507	0.154185	0.341723	0.987744	0.999756	0.0659339	0.0586093	0.946027	0.408319	0.0972738	0.242809	0.278898	0.953372	0.306821	0.848002	0.61635	0.306165	0.753667	0.728105	0.311398	0.500694	-4.54279
C=CC(=O)Nc1cc2c(Nc3ccc(F)c(Br)c3)ncnc2cn1	CHEMBL54091	1.1	nM	8.95861	387.013	5	2	3.7945	TRUE	388.2	3.7945	5	2	4	0.66516	0	79.8	0.526222	0.806109	0.916994	0.829431	0.583285	0.304253	0.351911	0.189911	0.232245	0.549222	0.681011	0.20373	0.376162	0.979744	0.999454	0.0942411	0.08358	0.878653	0.22489	0.0504434	0.248137	0.171483	0.91546	0.332539	0.812012	0.575325	0.235214	0.698294	0.760563	0.318218	0.562772	-4.93119
O=C1NCc2ccc(Oc3ccc(Nc4ncnc5ccn(CCO)c45)cc3Cl)cc21	CHEMBL2048789	1.3	nM	8.88606	435.11	7	3	3.8563	TRUE	435.871	3.8563	7	3	4	0.424901	0	101.3	0.361744	0.354312	0.841875	0.557717	0.666873	0.357082	0.633068	0.121207	0.214811	0.582434	0.732112	0.23083	0.305601	0.977096	0.999295	0.0144175	0.0226671	0.559765	0.381041	0.0155792	0.132512	0.0784001	0.810398	0.854908	0.558018	0.0578192	0.13813	0.664172	0.36236	0.220287	0.849433	-5.41946
Cc1cc(Nc2ncnc3ccc(NC(=O)/C=C/[C@H]4CCCN4C)cc23)ccc1Oc1cc2nncn2cn1	CHEMBL5179954	1.4	nM	8.85387	521.229	10	2	4.50072	TRUE	521.585	4.50072	10	2	3	0.298063	1	122.46	0.390305	0.46307	0.903166	0.065555	0.151655	0.298627	0.132174	0.147936	0.138679	0.787818	0.76867	0.324017	0.784866	0.974609	0.990358	0.0137496	0.0234032	0.210763	0.074695	0.0205466	0.0895507	0.0378285	0.825236	0.872799	0.648467	0.14421	0.0681241	0.266023	0.357295	0.103366	0.802269	-5.47794
C=CC(=O)N1CCC(Oc2cc3c(Nc4cccc(Cl)c4F)ncnc3cc2O[C@H]2CCOC2)CC1	CHEMBL5288888	1.42	nM	8.84771	512.163	7	1	4.8894	TRUE	512.969	4.8894	7	1	3	0.450993	1	85.81	0.134963	0.811218	0.80616	0.111202	0.645824	0.17371	0.556418	0.15861	0.0768809	0.816913	0.871538	0.11208	0.322743	0.954437	0.998944	0.0153626	0.0242271	0.407636	0.325936	0.0262823	0.109038	0.0873623	0.926411	0.891327	0.849157	0.0825436	0.157326	0.32222	0.265834	0.123059	0.814905	-4.919
Cc1cc(Nc2ncnc3cc(O)c(NC(=O)/C=C/[C@H]4CCCN4C)cc23)ccc1Oc1ccn2ncnc2c1	CHEMBL5193451	1.43	nM	8.84466	536.228	10	3	4.81132	TRUE	536.596	4.81132	10	3	3	0.198115	1	129.8	0.497666	0.284304	0.755641	0.0892091	0.189608	0.336397	0.225275	0.208565	0.0999563	0.756694	0.579624	0.250271	0.651606	0.957753	0.986103	0.0250796	0.0178779	0.26722	0.0988228	0.045405	0.13211	0.0409981	0.737971	0.80803	0.585059	0.213951	0.115485	0.453883	0.550613	0.135958	0.849468	-5.94766
O=C1Cc2cccc(Oc3ccc(Nc4ncnc5ccn(CCO)c45)cc3Cl)c2N1	CHEMBL2048795	1.5	nM	8.82391	435.11	7	3	4.1075	TRUE	435.871	4.1075	7	3	4	0.42109	0	101.3	0.220566	0.426898	0.773228	0.488396	0.744559	0.338706	0.675831	0.0914482	0.267418	0.639183	0.839165	0.169628	0.264645	0.972878	0.999102	0.0187345	0.030791	0.589875	0.405627	0.0173324	0.105387	0.124613	0.794133	0.85288	0.610902	0.0500553	0.146287	0.590461	0.426059	0.173674	0.809814	-5.43443
CC(=O)NCCn1ccc2ncnc(Nc3ccc(Oc4cccc5sncc45)c(Cl)c3)c21	CHEMBL2048906	1.6	nM	8.79588	478.098	8	2	5.3664	TRUE	478.965	5.3664	8	2	3	0.326519	0	93.96	0.350719	0.548254	0.812139	0.64062	0.894011	0.224748	0.766671	0.177474	0.562829	0.711762	0.93737	0.27945	0.383836	0.959038	0.999064	0.0168241	0.0189286	0.691112	0.539668	0.0481675	0.149938	0.127472	0.81585	0.930893	0.817035	0.0766298	0.213512	0.613407	0.42926	0.205528	0.890688	-5.46214
O=C1Cc2c(cccc2Oc2ccc(Nc3ncnc4ccn(CCO)c34)cc2Cl)N1	CHEMBL2048796	1.6	nM	8.79588	435.11	7	3	4.1075	TRUE	435.871	4.1075	7	3	4	0.42109	0	101.3	0.265293	0.362606	0.771959	0.554875	0.689878	0.285753	0.644284	0.110296	0.291253	0.598309	0.820053	0.176456	0.275215	0.975069	0.998806	0.0232544	0.0302621	0.599681	0.399247	0.0221019	0.131628	0.0986966	0.737666	0.851942	0.615426	0.0616151	0.153718	0.656206	0.488722	0.193468	0.823995	-5.41257
OCCn1ccc2ncnc(Nc3ccc(Oc4cccc5[nH]ncc45)c(Cl)c3)c21	CHEMBL2048903	1.7	nM	8.76955	420.11	7	3	4.4892	TRUE	420.86	4.4892	7	3	4	0.373919	0	100.88	0.152323	0.318726	0.814222	0.938048	0.91859	0.309191	0.868317	0.22998	0.441716	0.513454	0.969081	0.182528	0.22915	0.978536	0.999813	0.00895301	0.0114103	0.859191	0.675846	0.0269458	0.108322	0.144826	0.768932	0.790042	0.671144	0.0921339	0.184455	0.774801	0.455774	0.167941	0.926661	-5.60364
C#CC(=O)Nc1ccc2ncnc(Nc3cccc(Br)c3)c2c1	CHEMBL202360	1.9	nM	8.72125	366.012	4	2	3.7076	TRUE	367.206	3.7076	4	2	4	0.693022	0	66.91	0.855879	0.86584	0.953658	0.984148	0.538886	0.488149	0.167889	0.292229	0.608536	0.591037	0.906616	0.30234	0.269332	0.983433	0.999945	0.0639403	0.114983	0.965967	0.266434	0.0830377	0.521938	0.0654601	0.941804	0.177197	0.811542	0.437198	0.154476	0.682797	0.509823	0.44991	0.564372	-4.7277
C=CC(=O)Nc1cc2c(Nc3ccc(Oc4cc5nncn5cn4)c(C)c3)ncnc2cc1OCC	CHEMBL5175489	1.93	nM	8.71444	482.181	10	2	4.43502	TRUE	482.504	4.43502	10	2	4	0.308512	0	128.45	0.437223	0.39683	0.898268	0.114366	0.356394	0.327532	0.298121	0.0796574	0.139248	0.663324	0.808559	0.33913	0.437635	0.980048	0.988644	0.0139122	0.0328232	0.436326	0.140915	0.0287099	0.102948	0.0898385	0.745448	0.888172	0.720447	0.237666	0.114364	0.467818	0.539046	0.13992	0.795781	-5.48162
CN(C)C/C=C/C(=O)Nc1cc2c(Nc3ccc(F)c(Cl)c3)ncnc2cc1O[C@H]1CCOC1	CHEMBL1173655	2	nM	8.69897	485.163	7	2	4.3899	TRUE	485.947	4.3899	7	2	4	0.457293	1	88.61	0.612812	0.659157	0.887014	0.169001	0.261927	0.218058	0.116318	0.20705	0.164493	0.759887	0.750196	0.348606	0.757223	0.96307	0.993474	0.023045	0.018715	0.386244	0.261572	0.0428861	0.0766969	0.078594	0.877511	0.714276	0.687355	0.10277	0.107159	0.270377	0.415039	0.199078	0.8124	-4.98674
C[C@@H]1COC(Nc2ccc3ncnc(Nc4ccc(OCc5nccs5)c(Cl)c4)c3c2)=N1	CHEMBL2103842	2	nM	8.69897	466.098	9	2	5.2489	TRUE	466.954	5.2489	9	2	3	0.400512	1	93.55	0.458393	0.450086	0.923277	0.763187	0.767483	0.383663	0.551571	0.237873	0.369323	0.628386	0.840723	0.350705	0.300082	0.954442	0.998354	0.00730787	0.0154356	0.663103	0.381533	0.0305596	0.144334	0.119658	0.704434	0.868847	0.682361	0.176483	0.29836	0.609472	0.321225	0.238177	0.840191	-5.59221
Clc1cc(Nc2ncnc3[nH]nc(OCCN4CCCC4)c23)ccc1OCc1ccccn1	CHEMBL402553	2	nM	8.69897	465.168	8	2	4.1985	TRUE	465.945	4.1985	8	2	4	0.379027	0	101.08	0.407764	0.631885	0.87213	0.637514	0.476937	0.125272	0.261072	0.39353	0.660465	0.708461	0.822438	0.266501	0.829591	0.858195	0.995214	0.017668	0.0185696	0.559034	0.140044	0.0457759	0.111514	0.029307	0.80961	0.616648	0.498543	0.105124	0.0919811	0.223326	0.337315	0.269247	0.890153	-5.5825
CN(C)C/C=C/C(=O)Nc1cc2c(Nc3ccc(F)c(Cl)c3)ncnc2cn1	CHEMBL3968417	2	nM	8.69897	400.121	6	2	3.6172	TRUE	400.845	3.6172	6	2	4	0.614811	0	83.04	0.62692	0.7817	0.873867	0.343469	0.288635	0.220348	0.0816781	0.171753	0.32481	0.669294	0.554043	0.310648	0.77244	0.944257	0.993049	0.119934	0.0478503	0.607957	0.184226	0.0742434	0.126545	0.097566	0.894246	0.410653	0.514758	0.247017	0.0950885	0.281736	0.407859	0.225965	0.613347	-5.11436
CN(C)/N=C/c1c(N)ncnc1Nc1ccc2c(cnn2Cc2cccc(F)c2)c1	CHEMBL497459	2	nM	8.69897	404.187	8	2	3.235	TRUE	404.453	3.235	8	2	4	0.378261	0	97.25	0.593593	0.754386	0.933204	0.372832	0.621526	0.277812	0.266683	0.254828	0.185376	0.682193	0.924976	0.46136	0.523804	0.921012	0.999089	0.0124353	0.0367656	0.71481	0.477003	0.0275569	0.0721002	0.0193478	0.89104	0.59107	0.428043	0.119532	0.0290169	0.262274	0.0909826	0.149052	0.931825	-5.46227
O=C(CO)N1CCC[C@H]1COc1cccc2ncnc(Nc3ccc(OCc4ccccn4)c(Cl)c3)c12	CHEMBL403569	2	nM	8.69897	519.167	8	2	4.3629	TRUE	519.989	4.3629	8	2	3	0.335443	1	109.7	0.16876	0.239727	0.80916	0.233525	0.573926	0.250841	0.468204	0.144102	0.159081	0.779294	0.898256	0.200391	0.464429	0.961596	0.998406	0.0104856	0.0178658	0.543841	0.215255	0.0131189	0.0892948	0.0555148	0.865758	0.821479	0.741803	0.0272885	0.0881536	0.385203	0.324351	0.0884443	0.856294	-5.25091
CC(C)(Oc1cccc2ncnc(Nc3ccc(OCc4ccccn4)c(Cl)c3)c12)C(N)=O	CHEMBL518750	2	nM	8.69897	463.141	7	2	4.6435	TRUE	463.925	4.6435	7	2	4	0.390944	0	112.25	0.509747	0.561202	0.958311	0.537087	0.85818	0.380006	0.674306	0.131649	0.208287	0.805774	0.890923	0.387448	0.404596	0.911283	0.999506	0.0104034	0.0147811	0.545877	0.484513	0.0465414	0.146665	0.159399	0.932527	0.780436	0.662521	0.0741162	0.146974	0.484292	0.237975	0.143095	0.813326	-5.45943
COc1cc2ncnc(Nc3ccc(OCc4cccc(F)c4)c(Cl)c3)c2cc1OCCCN1CCNCCNCCNCC1	CHEMBL4522240	2.1	nM	8.67778	637.294	10	4	4.6068	TRUE	638.188	4.6068	10	4	3	0.174422	0	104.83	0.567813	0.529612	0.808878	0.279185	0.262296	0.115214	0.0927551	0.520163	0.571932	0.812824	0.864104	0.371532	0.771578	0.848826	0.983803	0.0147261	0.012279	0.527049	0.211558	0.052909	0.0710377	0.0260533	0.615314	0.926082	0.570672	0.0777474	0.097254	0.256007	0.318575	0.297575	0.986439	-5.79483
OCCn1ccc2ncnc(Nc3ccc(Oc4cccc5sncc45)c(Cl)c3)c21	CHEMBL2048905	2.1	nM	8.67778	437.071	8	2	5.2226	TRUE	437.912	5.2226	8	2	3	0.378411	0	85.09	0.250313	0.373793	0.809871	0.895261	0.86453	0.239556	0.754889	0.156771	0.375885	0.508725	0.88888	0.21121	0.191563	0.975336	0.999687	0.0205101	0.0195333	0.855481	0.772443	0.0321584	0.147165	0.227758	0.838517	0.909638	0.842038	0.0959157	0.308096	0.83632	0.559992	0.213111	0.90059	-5.2947
O=C(C#CCO)Nc1ccc2ncnc(Nc3ccc(F)c(Cl)c3)c2c1	CHEMBL202411	2.1	nM	8.67778	370.063	5	3	3.1001	TRUE	370.771	3.1001	5	3	4	0.616597	0	87.14	0.317982	0.586752	0.890971	0.820664	0.458856	0.439523	0.320778	0.122658	0.167737	0.564099	0.708652	0.237292	0.301861	0.987081	0.999748	0.0299414	0.0357037	0.855761	0.399018	0.0249494	0.126856	0.137142	0.93178	0.438643	0.632924	0.116002	0.159193	0.732298	0.399765	0.275551	0.68014	-4.83094
O=C(C#CCCN1CCCCC1)Nc1cc2c(Nc3ccc(F)c(Cl)c3)ncnc2cn1	CHEMBL205059	2.1	nM	8.67778	452.153	6	2	4.3788	TRUE	452.921	4.3788	6	2	4	0.558891	0	83.04	0.426885	0.846535	0.756509	0.471745	0.513259	0.145575	0.450194	0.340252	0.566559	0.610646	0.723486	0.207772	0.926567	0.883876	0.996289	0.0522117	0.0210936	0.635439	0.213485	0.0711773	0.139618	0.16914	0.90523	0.769631	0.71267	0.259313	0.272238	0.404632	0.476233	0.294399	0.869444	-4.91598
OCCOCCn1ccc2ncnc(Nc3ccc(Oc4cccc(Cl)c4)c(Cl)c3)c21	CHEMBL1923009	2.1	nM	8.67778	458.091	7	2	5.2829	TRUE	459.333	5.2829	7	2	3	0.331585	0	81.43	0.188703	0.574793	0.793836	0.884422	0.90637	0.221377	0.819529	0.296136	0.569809	0.667377	0.879339	0.274387	0.203687	0.915463	0.999372	0.0104639	0.0158	0.791505	0.70248	0.0171609	0.111426	0.157584	0.866493	0.966598	0.734152	0.0290373	0.301212	0.746534	0.242774	0.234216	0.951876	-5.14644
Cn1ncc2c(Oc3ccc(Nc4ncnc5ccn(CCO)c45)cc3Cl)cccc21	CHEMBL2048904	2.1	nM	8.67778	434.126	8	2	4.4996	TRUE	434.887	4.4996	8	2	4	0.408689	0	90.02	0.274008	0.349363	0.871061	0.734911	0.665664	0.287121	0.475767	0.185775	0.187504	0.674735	0.858897	0.303547	0.211309	0.962426	0.999531	0.0211932	0.0267089	0.71564	0.654396	0.030332	0.124371	0.118773	0.818462	0.92526	0.716524	0.101107	0.157162	0.693701	0.409243	0.123537	0.913174	-5.32135
O=C(C#CCCN1CCOCC1)Nc1ccc2ncnc(Nc3ccc(F)c(Cl)c3)c2c1	CHEMBL204085	2.3	nM	8.63827	453.137	6	2	3.8301	TRUE	453.905	3.8301	6	2	4	0.571498	0	79.38	0.508985	0.790728	0.864255	0.45547	0.601642	0.290748	0.480376	0.241525	0.296821	0.663013	0.896701	0.2851	0.860302	0.970032	0.998138	0.019637	0.0131494	0.533992	0.344177	0.0552195	0.0901686	0.153508	0.871248	0.762787	0.657297	0.13864	0.216797	0.504233	0.483225	0.330425	0.90964	-4.64977
CC(C)(C)NC(=O)c1cccc(Oc2ccc(Nc3ncnc4ccn(CCO)c34)cc2Cl)c1	CHEMBL2048788	2.3	nM	8.63827	479.172	7	3	5.1412	TRUE	479.968	5.1412	7	3	3	0.338977	0	101.3	0.171078	0.286798	0.845373	0.325603	0.847422	0.39716	0.840684	0.135452	0.191823	0.75423	0.75607	0.381686	0.230774	0.927302	0.999024	0.00568092	0.0106091	0.499955	0.505992	0.0106084	0.0824423	0.0703196	0.898989	0.929382	0.595337	0.0241409	0.176826	0.78027	0.192148	0.133858	0.890149	-5.3032
C#CC(=O)Nc1cc2c(Nc3cccc(Br)c3)ncnc2cn1	CHEMBL378144	2.4	nM	8.61979	367.007	5	2	3.1026	TRUE	368.194	3.1026	5	2	4	0.694864	0	79.8	0.82555	0.750921	0.943034	0.958156	0.27803	0.407524	0.166865	0.231428	0.298666	0.46128	0.759134	0.214458	0.378429	0.985883	0.999798	0.105987	0.116207	0.975724	0.171453	0.110125	0.479415	0.131665	0.915838	0.124035	0.837254	0.646092	0.192282	0.671591	0.731716	0.376525	0.381376	-4.69337
Cc1cc(Nc2ncnc3cc(O)c(NC(=O)/C=C/[C@H]4CCCN4C)cc23)ccc1Oc1cnc2ccnn2c1	CHEMBL5190132	2.41	nM	8.61798	536.228	10	3	4.81132	TRUE	536.596	4.81132	10	3	3	0.198115	1	129.8	0.516166	0.298254	0.748361	0.0983791	0.166667	0.351874	0.214335	0.200194	0.0843606	0.733274	0.565976	0.238427	0.615494	0.967867	0.985675	0.0191899	0.0173245	0.273012	0.0925761	0.0381765	0.126441	0.0354398	0.675689	0.808258	0.60582	0.247573	0.105637	0.459024	0.571539	0.144676	0.868942	-5.8527
O=C1NCc2cccc(Oc3ccc(Nc4ncnc5ccn(CCO)c45)cc3Cl)c21	CHEMBL2048794	2.5	nM	8.60206	435.11	7	3	3.8563	TRUE	435.871	3.8563	7	3	4	0.424901	0	101.3	0.348591	0.378539	0.835168	0.644267	0.72774	0.360761	0.694765	0.119341	0.231844	0.575944	0.781343	0.219394	0.304392	0.979779	0.999432	0.0129324	0.019979	0.596883	0.400249	0.0137043	0.114728	0.0967715	0.831144	0.868032	0.583851	0.0520727	0.139671	0.668361	0.362998	0.237193	0.855129	-5.3826
OCCn1ccc2ncnc(Nc3ccc(Oc4cccc5[nH]ccc45)c(Cl)c3)c21	CHEMBL2048797	2.5	nM	8.60206	419.115	6	3	5.0942	TRUE	419.872	5.0942	6	3	3	0.356344	0	87.99	0.229396	0.381583	0.771763	0.958063	0.937091	0.309359	0.802856	0.302389	0.603655	0.542122	0.938655	0.174419	0.178543	0.965106	0.999747	0.0216181	0.0160254	0.898315	0.672683	0.0473777	0.168067	0.192795	0.806239	0.915461	0.750451	0.10043	0.344486	0.838117	0.528164	0.20986	0.924945	-5.46074
COCC(=O)NC/C=C/c1ccc2ncnc(Nc3ccc(Oc4cc5nncn5cn4)c(C)c3)c2c1	CHEMBL5203179	2.55	nM	8.59346	496.197	10	2	3.68762	TRUE	496.531	3.68762	10	2	4	0.313866	0	128.45	0.597677	0.541287	0.894194	0.107498	0.315523	0.290892	0.279647	0.11334	0.124111	0.769266	0.88481	0.271446	0.543276	0.967358	0.994803	0.0145452	0.0212	0.358693	0.118186	0.0365375	0.104228	0.0687521	0.814993	0.88943	0.656137	0.151944	0.0782843	0.242965	0.393162	0.135742	0.858587	-5.56387
CCN(CC)CCC#CC(=O)Nc1ccc2ncnc(Nc3ccc(F)c(Cl)c3)c2c1	CHEMBL382073	2.6	nM	8.58503	439.158	5	2	4.8397	TRUE	439.922	4.8397	5	2	4	0.515343	0	70.15	0.710271	0.910507	0.820063	0.697567	0.603997	0.288382	0.345754	0.430201	0.82743	0.729851	0.798711	0.560191	0.845293	0.856176	0.994746	0.0378001	0.0159867	0.635707	0.300154	0.054819	0.105977	0.105991	0.88021	0.899126	0.528753	0.14871	0.241483	0.445033	0.336812	0.444252	0.936836	-4.95886
CC(C)N(CC#CC(=O)Nc1ccc2ncnc(Nc3ccc(F)c(Cl)c3)c2c1)C(C)C	CHEMBL380669	2.8	nM	8.55284	453.173	5	2	5.2266	TRUE	453.949	5.2266	5	2	3	0.500154	0	70.15	0.552149	0.881502	0.844309	0.489155	0.680607	0.333124	0.482536	0.323631	0.773397	0.797833	0.784294	0.658599	0.793346	0.828045	0.993993	0.0177001	0.0128039	0.592058	0.300165	0.0371516	0.0878096	0.0646288	0.9233	0.829891	0.464473	0.0605924	0.173382	0.493326	0.18978	0.417762	0.932802	-4.93451
CS(=O)(=O)O.O=C(CCO)NCCn1ccc2ncnc(Nc3ccc(Oc4cccc(C(F)(F)F)c4)c(Cl)c3)c21	CHEMBL1923022	2.8	nM	8.55284	615.117	9	4	4.642	TRUE	616.018	4.642	9	4	3	0.196999	0	155.67	0.313421	0.581132	0.755292	0.357928	0.587567	0.348159	0.571026	0.238562	0.425418	0.653144	0.856492	0.553184	0.644181	0.932787	0.991911	0.0130849	0.0318035	0.0983427	0.162031	0.00817399	0.0576987	0.0593251	0.670593	0.880289	0.470389	0.0166346	0.0411857	0.578045	0.22813	0.113251	0.93832	-5.56034
Cc1cc(Nc2ncnc3ccc(NC(=O)/C=C/CN(C)C)cc23)ccc1Oc1cc2nncn2cn1	CHEMBL5175873	2.85	nM	8.54516	495.213	10	2	3.96812	TRUE	495.547	3.96812	10	2	4	0.307898	0	122.46	0.535793	0.540211	0.894531	0.0734737	0.129958	0.314978	0.0731088	0.1465	0.213343	0.759931	0.730532	0.422216	0.728216	0.956567	0.96984	0.0211184	0.0267669	0.203021	0.0768259	0.0272339	0.0780883	0.0347152	0.744001	0.847318	0.437174	0.105823	0.0627169	0.210961	0.30221	0.124643	0.831896	-5.55333
CS(=O)(=O)CC(=O)NCCn1ccc2ncnc(Nc3ccc(Oc4cccc(Cl)c4)c(Cl)c3)c21	CHEMBL2148050	2.9	nM	8.5376	533.069	8	2	4.4348	TRUE	534.425	4.4348	8	2	3	0.326449	0	115.21	0.142755	0.763719	0.826711	0.677641	0.965815	0.457345	0.914574	0.214134	0.686737	0.788261	0.984753	0.368961	0.337906	0.963044	0.998281	0.00814083	0.0128545	0.312812	0.202719	0.0138324	0.0513904	0.14002	0.787998	0.911881	0.727397	0.015495	0.141984	0.363115	0.177432	0.11425	0.897667	-5.2756
CNC(=O)CN1CCC(Oc2cc3c(Nc4cccc(Cl)c4F)ncnc3cc2OC)CC1	CHEMBL2408045	3	nM	8.52288	473.163	7	2	3.7637	TRUE	473.936	3.7637	7	2	4	0.539702	0	88.61	0.192998	0.920767	0.879263	0.249716	0.611338	0.244511	0.359499	0.365413	0.309839	0.840584	0.920801	0.0937842	0.720879	0.916053	0.99978	0.0065666	0.00746495	0.503271	0.0914989	0.0138535	0.055311	0.0239731	0.96124	0.712159	0.499813	0.0444688	0.0264415	0.080305	0.10563	0.107109	0.890134	-4.96503
CNCCOc1n[nH]c2ncnc(Nc3ccc(OCc4ccccn4)c(Cl)c3)c12	CHEMBL255135	3	nM	8.52288	425.137	8	3	3.3221	TRUE	425.88	3.3221	8	3	4	0.350182	0	109.87	0.406087	0.473245	0.903543	0.655182	0.520869	0.192978	0.222749	0.30155	0.4381	0.674765	0.886384	0.293676	0.657664	0.931114	0.996111	0.00900932	0.0157608	0.683269	0.14128	0.0370112	0.0696598	0.0318491	0.799438	0.484424	0.423787	0.0915467	0.0659532	0.175621	0.250853	0.227576	0.827302	-5.68608
C=CC(=O)Nc1cc2c(Nc3ccc(F)c(Cl)c3)ncnc2cn1	CHEMBL53555	3	nM	8.52288	343.064	5	2	3.6854	TRUE	343.749	3.6854	5	2	4	0.706202	0	79.8	0.55791	0.750225	0.893342	0.808798	0.516548	0.247198	0.326343	0.154516	0.227358	0.544578	0.678099	0.163521	0.396451	0.986101	0.999529	0.131214	0.0657091	0.90396	0.421235	0.125653	0.267796	0.262858	0.91219	0.252951	0.860911	0.62517	0.287773	0.742009	0.787489	0.356661	0.410058	-4.77715
Clc1cc(Nc2ncnc3[nH]nc(OCCN4CCNCC4)c23)ccc1OCc1ccccn1	CHEMBL257430	3	nM	8.52288	480.179	9	3	3.0079	TRUE	480.96	3.0079	9	3	4	0.33238	0	113.11	0.307271	0.554015	0.813753	0.538088	0.51895	0.200363	0.326717	0.452196	0.462525	0.657779	0.852083	0.260192	0.773953	0.909577	0.992428	0.0148219	0.0179388	0.483778	0.0891075	0.0537434	0.0952152	0.0250996	0.683047	0.401291	0.439408	0.0436334	0.049058	0.162224	0.315674	0.305542	0.898826	-5.73858
COc1cc(Nc2ncnc3[nH]nc(OCCN4CCC(O)CC4)c23)ccc1OCc1cccc(F)c1	CHEMBL402339	3	nM	8.52288	508.223	9	3	3.6587	TRUE	508.554	3.6587	9	3	3	0.294962	0	117.65	0.17045	0.579601	0.819597	0.231695	0.388498	0.145832	0.30088	0.45516	0.476221	0.760391	0.756156	0.168919	0.757899	0.842955	0.997707	0.00754071	0.0147187	0.557291	0.0452055	0.00575803	0.0529228	0.00625439	0.720898	0.810657	0.381792	0.0568448	0.0233342	0.244121	0.18021	0.102347	0.968375	-5.34256
Cn1ccc2ncnc(Nc3ccc(Oc4cccc(Cl)c4)c(Cl)c3)c21	CHEMBL1923003	3.3	nM	8.48149	384.054	5	1	5.811	TRUE	385.254	5.811	5	1	3	0.481651	0	51.97	0.491769	0.782635	0.943663	0.982552	0.942825	0.272622	0.563964	0.202601	0.538454	0.666434	0.727771	0.290189	0.103816	0.94756	0.999963	0.0191244	0.0451864	0.893952	0.685372	0.0598626	0.301353	0.137231	0.944357	0.906589	0.865136	0.246228	0.377371	0.723311	0.319963	0.289551	0.764417	-4.93281
C=CC(=O)Nc1ccc2ncnc(Nc3ccc4[nH]cc(Br)c4c3)c2c1	CHEMBL5182567	3.5	nM	8.45593	407.038	4	3	4.7417	TRUE	408.259	4.7417	4	3	4	0.426189	0	82.7	0.608505	0.798961	0.818908	0.945531	0.801978	0.253864	0.361442	0.314403	0.669603	0.566181	0.859149	0.218393	0.320616	0.967781	0.999228	0.0827682	0.0496434	0.921211	0.345571	0.115674	0.359766	0.101797	0.826317	0.68246	0.793467	0.446946	0.366534	0.78675	0.792546	0.373465	0.793686	-5.3398
C=CC(=O)Nc1cccc(-c2c[nH]c3ncnc(Nc4ccc5[nH]c(Cc6ccccc6)nc5c4)c23)c1	CHEMBL4755170	3.5	nM	8.45593	485.196	5	4	5.9601	TRUE	485.551	5.9601	5	4	3	0.208544	0	111.38	0.474045	0.438636	0.645949	0.672717	0.87628	0.240403	0.69093	0.184796	0.652935	0.657628	0.850777	0.286661	0.371772	0.940056	0.993164	0.023666	0.0203522	0.794821	0.513328	0.059413	0.157812	0.0781212	0.694944	0.96055	0.795158	0.187582	0.346048	0.765342	0.635346	0.302178	0.961181	-5.51658
CN1C[C@@H](OC(=O)N2CC=CC2)C[C@H](C(=O)NO)[C@H]1C(=O)N1CCN(c2ccccc2)CC1	CHEMBL572091	3.8	nM	8.42022	457.233	7	2	0.5379	TRUE	457.531	0.5379	7	2	4	0.386203	3	105.66	0.315328	0.661223	0.522668	0.00183467	0.129148	0.218506	0.0153123	0.121075	0.016817	0.753153	0.125424	0.0832344	0.722576	0.564457	0.876775	0.00899624	0.0507128	0.0119085	0.00317409	0.00622128	0.0545426	0.00738755	0.809126	0.107337	0.282283	0.020781	0.00582125	0.00434395	0.0726722	0.202151	0.438405	-5.247
CCCC#CC(=O)Nc1cc2c(Nc3ccc(F)c(Cl)c3)ncnc2cn1	CHEMBL203645	3.8	nM	8.42022	383.095	5	2	4.3029	TRUE	383.814	4.3029	5	2	4	0.656332	0	79.8	0.419437	0.72161	0.867164	0.804655	0.694896	0.353998	0.63688	0.158861	0.160025	0.607624	0.721466	0.179068	0.353979	0.975795	0.999681	0.0478445	0.0466304	0.915653	0.45179	0.0881026	0.23125	0.343177	0.958021	0.557772	0.85651	0.502452	0.396295	0.794107	0.711637	0.294647	0.57236	-4.67367
O=C(NO)[C@H]1C[C@H](OC(=O)N2CCCC2)CN[C@@H]1C(=O)N1CCN(c2ccccc2)CC1	CHEMBL566233	3.8	nM	8.42022	445.233	7	3	0.4197	TRUE	445.52	0.4197	7	3	4	0.454584	3	114.45	0.286917	0.560891	0.458914	0.0038382	0.165086	0.157708	0.0390767	0.129862	0.0149894	0.727513	0.109888	0.0592632	0.57266	0.509648	0.800625	0.0168126	0.0580832	0.0228672	0.00555647	0.0165851	0.121137	0.0156843	0.614738	0.0535186	0.350617	0.0741727	0.0151733	0.00980079	0.252164	0.237987	0.484817	-5.32161
C=CC(=O)Nc1cc2c(Nc3cccc(Br)c3)ncnc2cn1	CHEMBL51659	3.9	nM	8.40894	369.023	5	2	3.6554	TRUE	370.21	3.6554	5	2	4	0.685602	0	79.8	0.595714	0.847011	0.894945	0.937829	0.602875	0.267166	0.302394	0.224068	0.314674	0.4938	0.541319	0.159251	0.299255	0.975891	0.999674	0.112471	0.0718352	0.898768	0.246051	0.0553666	0.346848	0.128597	0.937812	0.337875	0.822095	0.566958	0.279758	0.737838	0.757871	0.432166	0.490358	-4.99991
COCCOc1cc2ncnc(Nc3ccc4c(cnn4Cc4ccccc4)c3)c2cc1NC(=O)/C=C/CN(C)C	CHEMBL3959248	4	nM	8.39794	551.264	9	2	4.8529	TRUE	551.651	4.8529	9	2	3	0.167428	0	106.43	0.588536	0.535567	0.796475	0.0835446	0.345501	0.263676	0.205234	0.226298	0.137463	0.831425	0.746545	0.431109	0.661907	0.945486	0.972998	0.0100939	0.0162855	0.494196	0.166846	0.0217729	0.0399016	0.0253471	0.808829	0.949404	0.665177	0.0989826	0.0809373	0.374858	0.385785	0.164192	0.968995	-5.26849
NC1CCN(Cc2ccn3ncnc(Nc4cccc(Cl)c4)c23)CC1	CHEMBL1645473	4	nM	8.39794	356.152	6	2	3.0494	TRUE	356.861	3.0494	6	2	4	0.751386	0	71.48	0.21187	0.991493	0.920364	0.333989	0.210921	0.0629984	0.0342224	0.513861	0.901267	0.501139	0.208703	0.12704	0.845725	0.44876	0.999902	0.00917763	0.0212263	0.319082	0.118041	0.00918619	0.0879789	0.000767368	0.883032	0.308213	0.180552	0.00717571	0.00883781	0.0154169	0.00991869	0.343872	0.94129	-5.498
COC1CCN(CCOc2n[nH]c3ncnc(Nc4ccc(OCc5ccccn5)c(Cl)c4)c23)CC1	CHEMBL411897	4	nM	8.39794	509.194	9	2	4.2135	TRUE	509.998	4.2135	9	2	3	0.324435	0	110.31	0.310036	0.704915	0.851939	0.283309	0.470377	0.0701228	0.281558	0.362109	0.503298	0.810184	0.63434	0.147995	0.780645	0.802296	0.996454	0.00820532	0.0119653	0.608979	0.11239	0.0341299	0.107768	0.0180617	0.85702	0.624391	0.474083	0.0739907	0.0784874	0.169435	0.252229	0.232298	0.901319	-5.52308
OCCOc1n[nH]c2ncnc(Nc3ccc(OCc4ccccn4)c(Cl)c3)c12	CHEMBL257861	4	nM	8.39794	412.105	8	3	3.095	TRUE	412.837	3.095	8	3	4	0.403745	0	118.07	0.155441	0.22573	0.894304	0.742483	0.495957	0.271886	0.38745	0.150552	0.158783	0.448455	0.790555	0.192482	0.266092	0.970715	0.998422	0.00935968	0.0138219	0.788415	0.173036	0.0205601	0.0790922	0.0647657	0.75602	0.336016	0.475372	0.0739169	0.0835501	0.371681	0.331394	0.182104	0.680723	-5.66403
CN1CCN(CCCOc2n[nH]c3ncnc(Nc4ccc(OCc5ccccn5)c(Cl)c4)c23)CC1	CHEMBL272935	4	nM	8.39794	508.21	9	2	3.7402	TRUE	509.014	3.7402	9	2	3	0.309804	0	104.32	0.364287	0.637162	0.775244	0.301103	0.412976	0.15855	0.154695	0.436948	0.590707	0.783809	0.83105	0.279094	0.850602	0.853488	0.988335	0.00660969	0.0157396	0.378412	0.0806033	0.033933	0.0624166	0.0105331	0.770506	0.60019	0.430456	0.0272565	0.0307145	0.129082	0.168652	0.306964	0.945903	-5.53699
OCc1ccc(-c2cc3c(Nc4ccc(OCc5ccccc5)cc4)ncnc3cn2)o1	CHEMBL479171	4	nM	8.39794	424.154	7	2	5.0997	TRUE	424.46	5.0997	7	2	3	0.375372	0	93.3	0.438143	0.131676	0.840101	0.590093	0.730163	0.299587	0.479686	0.0871255	0.188628	0.488625	0.554151	0.302925	0.0876643	0.96854	0.997502	0.0282836	0.0485736	0.770294	0.62299	0.0394113	0.270153	0.190631	0.81806	0.939518	0.864286	0.19582	0.31523	0.863516	0.461759	0.210731	0.926797	-5.33199
CN(CCOc1cccc2ncnc(Nc3ccc(OCc4ccccn4)c(Cl)c3)c12)C(=O)CO	CHEMBL249928	4	nM	8.39794	493.152	8	2	3.8303	TRUE	493.951	3.8303	8	2	4	0.342808	0	109.7	0.259228	0.209823	0.852704	0.327276	0.644281	0.382418	0.327808	0.114358	0.251132	0.74911	0.898859	0.267685	0.367566	0.961068	0.997724	0.00859904	0.0167797	0.696591	0.200489	0.010533	0.0548687	0.0444061	0.879217	0.746206	0.52051	0.0180079	0.0576673	0.291686	0.198675	0.096791	0.825347	-5.19632
Cc1c(C(=O)NCCN2CCOCC2)[nH]c2cnnc(Nc3ccc(OCc4cccc(F)c4)c(Cl)c3)c12	CHEMBL1080506	4	nM	8.39794	538.19	7	3	4.44342	TRUE	539.011	4.44342	7	3	3	0.289187	0	104.4	0.403613	0.518443	0.880749	0.269878	0.70222	0.252029	0.726251	0.346327	0.313843	0.818043	0.951637	0.438106	0.679859	0.944509	0.999147	0.00423139	0.00652061	0.551326	0.194228	0.0156898	0.0686596	0.0470965	0.723094	0.959296	0.648976	0.0598344	0.0859994	0.669292	0.291899	0.242794	0.963396	-5.25454
NC1CCN(Cc2ccn3ncnc(Nc4cccc(Br)c4)c23)CC1	CHEMBL1645474	4	nM	8.39794	400.101	6	2	3.1585	TRUE	401.312	3.1585	6	2	4	0.702976	0	71.48	0.246967	0.991828	0.9049	0.317325	0.187218	0.0648582	0.039073	0.588374	0.923268	0.427178	0.172239	0.15239	0.845012	0.415776	0.999778	0.00957298	0.02272	0.304181	0.0921876	0.00656777	0.0845645	0.000793865	0.841146	0.374377	0.175448	0.00842597	0.00903126	0.0178483	0.0130982	0.369578	0.962468	-5.61075
C=C(F)C(=O)Nc1cc2c(Nc3ccc(Oc4cc5nncn5cn4)c(C)c3)ncnc2cc1OCC	CHEMBL5183924	4.05	nM	8.39254	500.172	10	2	4.73222	TRUE	500.494	4.73222	10	2	3	0.290509	0	128.45	0.516223	0.383493	0.926908	0.095633	0.360102	0.344301	0.410039	0.0534931	0.105075	0.602065	0.766987	0.471608	0.488293	0.98923	0.993515	0.00777906	0.0186481	0.286677	0.139819	0.0153503	0.0663176	0.0750435	0.677632	0.858426	0.666667	0.136374	0.0486226	0.467103	0.36195	0.152868	0.818235	-5.26501
CC(C(=O)NCCn1ccc2ncnc(Nc3ccc(Oc4cccc(Cl)c4)c(Cl)c3)c21)S(C)(=O)=O	CHEMBL2148051	4.1	nM	8.38722	547.085	8	2	4.8233	TRUE	548.452	4.8233	8	2	3	0.308161	1	115.21	0.155587	0.693299	0.795768	0.557734	0.981145	0.427883	0.947782	0.157239	0.702826	0.823649	0.988113	0.319172	0.267886	0.947691	0.998975	0.00588221	0.0104057	0.368954	0.331776	0.0185977	0.0626744	0.148049	0.804946	0.92729	0.77797	0.0143125	0.173227	0.483707	0.186016	0.108534	0.903926	-5.1782
OCCn1ccc2ncnc(Nc3ccc(Oc4cccc(Cl)c4)c(Cl)c3)c21	CHEMBL1923006	4.1	nM	8.38722	414.065	6	2	5.2663	TRUE	415.28	5.2663	6	2	3	0.449225	0	72.2	0.199161	0.584999	0.852735	0.964935	0.935618	0.295915	0.818445	0.256631	0.650314	0.557969	0.857856	0.210721	0.138538	0.948362	0.999845	0.0158498	0.0216032	0.862044	0.73604	0.0237906	0.166126	0.210006	0.918511	0.925417	0.770475	0.058971	0.336082	0.814493	0.334789	0.238104	0.888301	-5.08189
Cn1nc(C(C)(C)C)cc1NC(=O)Nc1ccc(Cc2ccncc2)cc1	CHEMBL288812	4.2	nM	8.37675	363.206	4	2	4.3474	TRUE	363.465	4.3474	4	2	4	0.723845	0	71.84	0.249424	0.806932	0.931503	0.410203	0.855504	0.565673	0.856392	0.219539	0.206512	0.686439	0.852104	0.435189	0.496625	0.78329	0.999753	0.00535002	0.0222997	0.46385	0.456976	0.0421864	0.0965307	0.0251501	0.939528	0.51274	0.55792	0.0815835	0.114447	0.810054	0.112452	0.306918	0.781472	-5.02909
C=CC(=O)Nc1ccc2ncnc(Nc3ccc(F)c(Cl)c3)c2c1	CHEMBL31373	4.3	nM	8.36653	342.068	4	2	4.2904	TRUE	342.761	4.2904	4	2	4	0.693987	0	66.91	0.543925	0.847944	0.906451	0.895302	0.746482	0.281029	0.31397	0.157021	0.500099	0.637573	0.865803	0.187639	0.274991	0.983739	0.999755	0.0877847	0.0675662	0.933559	0.58227	0.126304	0.326861	0.172571	0.918816	0.349719	0.870278	0.522554	0.312083	0.787134	0.746472	0.311865	0.500685	-4.70646
O=C(CO)NCCn1ccc2ncnc(Nc3ccc(Oc4cccc(C(F)(F)F)c4)c(Cl)c3)c21	CHEMBL1923019	4.3	nM	8.36653	505.113	7	3	4.7479	TRUE	505.884	4.7479	7	3	3	0.319407	0	101.3	0.160229	0.645075	0.80133	0.645913	0.85281	0.243202	0.716432	0.157065	0.509479	0.663419	0.946423	0.275587	0.334667	0.945135	0.999231	0.01346	0.0267492	0.417163	0.448011	0.0120641	0.0755992	0.12176	0.83068	0.913916	0.626496	0.0263454	0.0750967	0.758822	0.377236	0.0749862	0.922347	-5.3516
O=C(NO)[C@H]1CC(CC(=O)N2CCCC2)CN[C@@H]1C(=O)N1CC=C(c2ccccc2)CC1	CHEMBL569166	4.3	nM	8.36653	440.242	5	3	1.4145	TRUE	440.544	1.4145	5	3	4	0.474784	3	101.98	0.291167	0.529507	0.554912	0.018981	0.182026	0.0980571	0.0477245	0.190684	0.0867977	0.764222	0.48221	0.0655287	0.479281	0.376006	0.963767	0.0154771	0.0256918	0.0502301	0.0118346	0.019588	0.139456	0.0109737	0.724543	0.191033	0.393062	0.0540175	0.0311564	0.012585	0.0825258	0.364871	0.465969	-5.72341
CN1C[C@@H](OC(=O)N2CCCCCC2)C[C@H](C(=O)NO)[C@H]1C(=O)N1CCN(c2ccccc2)CC1	CHEMBL572302	4.4	nM	8.35655	487.279	7	2	1.5421	TRUE	487.601	1.5421	7	2	4	0.490297	3	105.66	0.288068	0.615048	0.496048	0.00569509	0.290702	0.235044	0.0611721	0.18421	0.0406397	0.820181	0.519301	0.0677949	0.734947	0.608953	0.945868	0.00680404	0.0406237	0.0253956	0.00682421	0.0116897	0.0595022	0.020643	0.893754	0.281881	0.447183	0.0539387	0.0143586	0.026986	0.172604	0.211701	0.659222	-5.17304
Cc1cccc(Oc2ccc(Nc3ncnc4cc[nH]c34)cc2Cl)c1	CHEMBL1922999	4.6	nM	8.33724	350.093	4	2	5.45562	TRUE	350.809	5.45562	4	2	3	0.512976	0	62.83	0.667584	0.642469	0.936914	0.989786	0.970289	0.311132	0.626598	0.305852	0.581356	0.691782	0.916346	0.240302	0.092399	0.961882	0.999984	0.0154977	0.030023	0.9515	0.679375	0.143987	0.43906	0.138249	0.92791	0.780232	0.859997	0.372444	0.458819	0.843246	0.494061	0.322466	0.759109	-5.1706
C=CC(=O)Nc1cc(Nc2nccc(-c3cn(C)c4ccccc34)n2)c(OC)cc1N(C)CCN(C)C	CHEMBL3353410	4.8	nM	8.31876	499.27	8	2	4.5098	TRUE	499.619	4.5098	8	2	4	0.310535	0	87.55	0.740212	0.736957	0.786104	0.374658	0.209838	0.266263	0.0408849	0.301729	0.466217	0.857173	0.82621	0.31663	0.662321	0.91195	0.989887	0.0752608	0.0280878	0.737772	0.270336	0.0518191	0.0473883	0.0318418	0.876687	0.951034	0.483002	0.22351	0.181743	0.39225	0.614862	0.202611	0.957391	-5.08329
Cc1cccc(Nc2ncnn3ccc(CN4CCC(N)CC4)c23)c1	CHEMBL1645470	5	nM	8.30103	336.206	6	2	2.70442	TRUE	336.443	2.70442	6	2	4	0.766371	0	71.48	0.282151	0.990032	0.931299	0.19612	0.107084	0.076841	0.0248061	0.637172	0.811438	0.538005	0.181676	0.120743	0.83652	0.281469	0.999876	0.00721166	0.0261192	0.269103	0.0565915	0.00652	0.0854045	0.000470452	0.870729	0.323265	0.0899101	0.0073443	0.00508887	0.00873429	0.00723378	0.300054	0.964338	-5.64127
Cc1ccc(Oc2ccc(Nc3ncnc4[nH]nc(OCCN5CCC(O)CC5)c34)cc2F)cn1	CHEMBL257873	5	nM	8.30103	479.208	9	3	3.56682	TRUE	479.516	3.56682	9	3	4	0.348157	0	121.31	0.261281	0.512398	0.826237	0.111135	0.147073	0.103576	0.149593	0.350787	0.393924	0.690165	0.545635	0.249278	0.85018	0.803994	0.99465	0.0144561	0.0207832	0.356077	0.0363418	0.00912231	0.0789599	0.00571601	0.624338	0.599875	0.240187	0.0382707	0.0146773	0.161025	0.132086	0.101465	0.929872	-5.45098
Cc1cc(Nc2ncnc3[nH]nc(OCCN4CCC(O)CC4)c23)ccc1OCc1ccccn1	CHEMBL403435	5	nM	8.30103	475.233	9	3	3.21442	TRUE	475.553	3.21442	9	3	4	0.334921	0	121.31	0.151169	0.397456	0.760438	0.126592	0.136982	0.09702	0.103368	0.389732	0.332994	0.741044	0.352298	0.171733	0.696728	0.721151	0.988014	0.0152194	0.021956	0.437854	0.0278696	0.0119519	0.109368	0.00510482	0.626797	0.5251	0.23418	0.0352506	0.028556	0.181327	0.200566	0.134748	0.908045	-5.76059
OC1CCN(CCOc2n[nH]c3ncnc(Nc4ccc(OCc5ccccn5)c(Cl)c4)c23)CC1	CHEMBL404405	5	nM	8.30103	495.179	9	3	3.5594	TRUE	495.971	3.5594	9	3	4	0.319667	0	121.31	0.143185	0.443335	0.750244	0.296746	0.315536	0.0884588	0.198273	0.347155	0.437993	0.657772	0.422672	0.165561	0.71719	0.811193	0.991047	0.0148404	0.0173725	0.549636	0.0657704	0.0169614	0.111684	0.0128161	0.634511	0.51336	0.365054	0.0383556	0.0484794	0.197215	0.23146	0.184161	0.872581	-5.74791
O=C(/C=C/C(=O)Nc1cc2c(Nc3cccc(Br)c3)ncnc2cn1)NCCCN1CCOCC1	CHEMBL136058	5	nM	8.30103	539.128	8	3	2.8641	TRUE	540.422	2.8641	8	3	3	0.280047	0	121.37	0.646878	0.74174	0.596627	0.0654618	0.371504	0.0935615	0.241917	0.106028	0.269835	0.485042	0.51398	0.20641	0.820134	0.898686	0.894306	0.0599244	0.0238604	0.357953	0.10245	0.0847565	0.125889	0.0491848	0.624694	0.623431	0.660138	0.312337	0.169791	0.24752	0.629319	0.381989	0.826418	-5.35184
OCCOCCn1ccc2ncnc(Nc3ccc(Oc4cccc(C(F)(F)F)c4)c(Cl)c3)c21	CHEMBL1923010	5.1	nM	8.29243	492.118	7	2	5.6483	TRUE	492.885	5.6483	7	2	3	0.293887	0	81.43	0.134867	0.658185	0.755291	0.810913	0.860228	0.167476	0.73731	0.236654	0.368661	0.681761	0.923587	0.301189	0.22188	0.892958	0.999404	0.0109412	0.0169034	0.446676	0.661555	0.0156449	0.083192	0.179653	0.814552	0.967093	0.668738	0.0219419	0.16136	0.837546	0.339059	0.103573	0.964776	-5.06884
C=CC(=O)N1CCC(Oc2cc3c(Nc4ccc(Cl)c(Cl)c4F)ncnc3cc2OC)CC1	CHEMBL3545154	5.3	nM	8.27572	490.097	6	1	5.3837	TRUE	491.35	5.3837	6	1	3	0.368575	0	76.58	0.111145	0.893321	0.856205	0.254463	0.80841	0.237133	0.765118	0.198215	0.0830364	0.802074	0.911	0.107975	0.330221	0.962881	0.999662	0.0107304	0.0146016	0.664322	0.291926	0.0227669	0.0788295	0.0795389	0.966136	0.925579	0.842973	0.0989398	0.17275	0.373511	0.277927	0.124117	0.841407	-4.7035
C=CC(=O)Nc1cc2c(Nc3ccc(F)c(Cl)c3)ncnc2cc1OCc1cn(CCC(=O)NO)nn1	CHEMBL4793338	5.4	nM	8.26761	526.128	10	4	3.3564	TRUE	526.916	3.3564	10	4	3	0.138102	0	156.18	0.903512	0.497271	0.879935	0.165585	0.372008	0.168323	0.287607	0.0698967	0.204762	0.699333	0.905848	0.392382	0.722552	0.965992	0.991029	0.0123695	0.00687626	0.221159	0.0964254	0.0491797	0.0870882	0.097001	0.632947	0.69516	0.620282	0.126566	0.0561114	0.143752	0.499303	0.263536	0.719694	-5.55394
CCCCC#CC(=O)Nc1cc2c(Nc3ccc(F)c(Cl)c3)ncnc2cn1	CHEMBL202424	5.4	nM	8.26761	397.111	5	2	4.693	TRUE	397.841	4.693	5	2	4	0.481813	0	79.8	0.446465	0.780462	0.82526	0.685184	0.755934	0.314756	0.741425	0.164529	0.160468	0.652774	0.70668	0.210826	0.46824	0.959387	0.99948	0.0279127	0.0346393	0.885511	0.476167	0.0666885	0.196253	0.302572	0.949084	0.779316	0.847026	0.415511	0.368335	0.787167	0.686989	0.334186	0.73759	-4.78789
O=C(NO)[C@H]1CC(CC(=O)N2CCCC2)CN[C@@H]1C(=O)N1CC[C@H](c2ccccc2)C1	CHEMBL576061	5.6	nM	8.25181	428.242	5	3	1.1147	TRUE	428.533	1.1147	5	3	4	0.481833	4	101.98	0.245406	0.44065	0.561111	0.00583738	0.0786549	0.0719759	0.0200112	0.160762	0.0604168	0.747953	0.395768	0.0437718	0.431638	0.196235	0.955702	0.0165321	0.0341355	0.019533	0.00755424	0.018178	0.13499	0.00440383	0.628956	0.0939026	0.205137	0.0188525	0.0147599	0.00505793	0.0444192	0.338885	0.361284	-5.729
O=C(NO)[C@H]1CC(OC(=O)N2CCCC2)CN[C@@H]1C(=O)N1CC=C(c2ccccc2)CC1	CHEMBL569388	5.6	nM	8.25181	442.222	6	3	1.3868	TRUE	442.516	1.3868	6	3	4	0.48006	3	111.21	0.508207	0.619713	0.648178	0.0239786	0.230588	0.131411	0.0849238	0.161827	0.0466424	0.707626	0.372349	0.0715246	0.654022	0.587332	0.948633	0.015479	0.035621	0.0692776	0.0145818	0.0290623	0.17646	0.0220929	0.735837	0.168938	0.46772	0.156131	0.031666	0.0188005	0.286111	0.279321	0.503216	-5.45362
C=CC(=O)Nc1cc2c(Nc3ccc(F)c(Cl)c3)ncnc2cc1OCc1cn(CCCC(=O)NO)nn1	CHEMBL4759072	5.7	nM	8.24413	540.144	10	4	3.7465	TRUE	540.943	3.7465	10	4	3	0.126291	0	156.18	0.884431	0.496157	0.873705	0.157487	0.514597	0.174689	0.40297	0.0719831	0.269394	0.75256	0.927574	0.389708	0.701442	0.960449	0.993642	0.0105233	0.00781212	0.269234	0.114686	0.0476432	0.0933229	0.102244	0.674254	0.800076	0.662229	0.126662	0.0669892	0.206856	0.511873	0.236627	0.766316	-5.54459
C=CC(=O)Nc1ccc2ncnc(Nc3cccc(Br)c3)c2c1	CHEMBL285063	5.7	nM	8.24413	368.027	4	2	4.2604	TRUE	369.222	4.2604	4	2	4	0.674718	0	66.91	0.612492	0.924824	0.894248	0.975615	0.813759	0.298249	0.305546	0.281993	0.682132	0.599778	0.823832	0.18562	0.254934	0.97137	0.999819	0.0920611	0.0730593	0.920735	0.395838	0.0685583	0.430548	0.0955358	0.940383	0.532566	0.861823	0.456571	0.329893	0.774447	0.723632	0.455006	0.640025	-4.91787
OCCn1ccc2ncnc(Nc3ccc(Oc4cccc5sccc45)c(Cl)c3)c21	CHEMBL2048798	6	nM	8.22185	436.076	7	2	5.8276	TRUE	436.924	5.8276	7	2	3	0.35021	0	72.2	0.360613	0.521232	0.76397	0.922141	0.898527	0.315755	0.750801	0.20145	0.65865	0.543129	0.891252	0.212854	0.17246	0.961703	0.99956	0.0299991	0.0232434	0.841543	0.674674	0.0338056	0.207557	0.228168	0.794585	0.941657	0.827555	0.104444	0.431846	0.841664	0.590581	0.290993	0.899868	-5.26953
C[C@H](Oc1cccc2ncnc(Nc3ccc4c(cnn4Cc4cccc(F)c4)c3)c12)C(=O)N(C)C	CHEMBL256784	6	nM	8.22185	484.202	7	1	4.766	TRUE	484.535	4.766	7	1	4	0.358392	1	85.17	0.476978	0.595335	0.935098	0.224932	0.709562	0.575385	0.515982	0.190377	0.196895	0.806503	0.967253	0.502946	0.511406	0.972246	0.999445	0.0051126	0.0162858	0.375254	0.274849	0.00667438	0.0544259	0.0403854	0.915691	0.950402	0.70496	0.0254706	0.0232656	0.485899	0.0693034	0.110233	0.95566	-5.031
NC1CCN(Cc2ccn3ncnc(Nc4cccc(F)c4)c23)CC1	CHEMBL1645472	6	nM	8.22185	340.181	6	2	2.5351	TRUE	340.406	2.5351	6	2	4	0.763606	0	71.48	0.344327	0.992037	0.94781	0.236086	0.15268	0.0839468	0.0396082	0.629327	0.820578	0.46593	0.282689	0.169742	0.911137	0.342005	0.999932	0.0130118	0.03784	0.220238	0.0565663	0.00646459	0.0720751	0.000528136	0.867522	0.267531	0.113619	0.00956398	0.0028503	0.00490716	0.00496415	0.256724	0.965734	-5.43812
Cc1ccc(Nc2ncnn3ccc(CN4CCC(N)CC4)c23)cc1	CHEMBL1645471	6	nM	8.22185	336.206	6	2	2.70442	TRUE	336.443	2.70442	6	2	4	0.766371	0	71.48	0.276872	0.986982	0.929299	0.130003	0.0953469	0.0819333	0.0266077	0.608892	0.753569	0.536739	0.123448	0.140432	0.832558	0.299389	0.999725	0.00707519	0.0249122	0.22478	0.0572599	0.0068492	0.0842804	0.000569484	0.836337	0.314412	0.0991203	0.00913554	0.00544727	0.0103369	0.00866538	0.308572	0.960207	-5.65318
NC1CCN(Cc2ccn3ncnc(Nc4ccc(F)c(Cl)c4)c23)CC1	CHEMBL1645476	6	nM	8.22185	374.142	6	2	3.1885	TRUE	374.851	3.1885	6	2	4	0.733447	0	71.48	0.24201	0.987401	0.933509	0.327393	0.365505	0.089837	0.130193	0.535512	0.847894	0.541216	0.620962	0.183547	0.914647	0.550995	0.99993	0.0169019	0.0258135	0.395835	0.1844	0.0181833	0.0858644	0.00257793	0.912587	0.427794	0.272471	0.0198273	0.0116443	0.0247939	0.015792	0.254064	0.946546	-5.42165
COCCO/N=C/c1c(N)ncnc1Nc1ccc2c(cnn2Cc2cccc(F)c2)c1	CHEMBL255237	6	nM	8.22185	435.182	9	2	3.3364	TRUE	435.463	3.3364	9	2	4	0.235521	0	112.47	0.550727	0.777353	0.85057	0.163555	0.766896	0.173804	0.472208	0.193069	0.143975	0.767669	0.959282	0.322506	0.48168	0.916525	0.998345	0.00578188	0.0241665	0.644672	0.376653	0.0207381	0.0670344	0.0211855	0.818233	0.81313	0.560447	0.110245	0.0370176	0.134499	0.100959	0.16146	0.967405	-5.39552
CCN1CCN(Cc2ccc(-c3cc4c(N[C@H](C)c5ccccc5)ncnc4[nH]3)cc2)CC1	CHEMBL587723	6	nM	8.22185	440.269	5	2	4.9355	TRUE	440.595	4.9355	5	2	4	0.426456	1	60.08	0.296619	0.879183	0.771728	0.456046	0.165889	0.344515	0.0552291	0.642794	0.690436	0.564528	0.447091	0.261008	0.774626	0.669305	0.99071	0.00661785	0.0122112	0.266445	0.087232	0.0167687	0.0450501	0.00281819	0.817079	0.627264	0.129041	0.0080689	0.0268151	0.11746	0.0378938	0.472054	0.987543	-5.29912
OC1CCN(CCCOc2n[nH]c3ncnc(Nc4ccc(OCc5ccccn5)c(Cl)c4)c23)CC1	CHEMBL257860	6	nM	8.22185	509.194	9	3	3.9495	TRUE	509.998	3.9495	9	3	3	0.272643	0	121.31	0.152137	0.450573	0.675849	0.199799	0.303238	0.0600832	0.176667	0.356906	0.511945	0.73683	0.451163	0.159486	0.71256	0.732934	0.986693	0.0115776	0.0163786	0.540925	0.0844213	0.0192018	0.106971	0.00951112	0.618864	0.636601	0.387456	0.0353575	0.045957	0.207976	0.215631	0.199346	0.924109	-5.7518
CN(C)C/C=C/C(=O)Nc1cc2c(Nc3ccc(F)c(Cl)c3)ncnc2cc1OCC1C2COCC21	CHEMBL3892310	6	nM	8.22185	511.179	7	2	4.4934	TRUE	511.985	4.4934	7	2	3	0.408997	2	88.61	0.520895	0.78538	0.899775	0.18829	0.33919	0.259811	0.173173	0.225266	0.247369	0.764911	0.803782	0.363169	0.698509	0.956924	0.996684	0.0206374	0.0140273	0.407864	0.208562	0.0328232	0.0820153	0.0757726	0.813632	0.798219	0.733908	0.224857	0.174644	0.506229	0.449829	0.165128	0.808182	-5.07395
CN1CCN(CC(=O)Nc2ccc3ncnc(Nc4ccc(OCc5cccc(F)c5)c(Cl)c4)c3c2)CC1	CHEMBL4796265	6.1	nM	8.21467	534.195	7	2	4.9308	TRUE	535.023	4.9308	7	2	3	0.331478	0	82.62	0.303159	0.645393	0.770471	0.380809	0.829994	0.449032	0.548207	0.391312	0.603569	0.859601	0.937274	0.437491	0.767387	0.95739	0.997151	0.00723689	0.00838433	0.449716	0.150879	0.0199201	0.0525093	0.062073	0.828904	0.910522	0.705696	0.0241417	0.106001	0.336628	0.290708	0.210385	0.959751	-5.16007
CN(C)C/C=C/C(=O)Nc1cc2ncnc(Nc3ccc(F)c(Cl)c3)c2cc1O[C@@H]1CCOC1	CHEMBL4759112	6.2	nM	8.20761	485.163	7	2	4.3899	TRUE	485.947	4.3899	7	2	4	0.457293	1	88.61	0.605091	0.655286	0.889129	0.143421	0.272163	0.226713	0.127939	0.192843	0.159358	0.7666	0.731309	0.369559	0.759596	0.962209	0.992246	0.0208081	0.0186835	0.365359	0.246202	0.0399956	0.0756464	0.0765692	0.872829	0.717872	0.688754	0.0968968	0.107376	0.265775	0.400021	0.190142	0.805158	-5.00407
O=C(Nc1cccc(-c2nc3sccn3c2-c2ccnc(Nc3ccccc3)n2)c1)c1ccccc1	CHEMBL1093234	6.3	nM	8.20066	488.142	7	2	6.5157	TRUE	488.576	6.5157	7	2	3	0.278971	0	84.21	0.362357	0.402804	0.806883	0.243913	0.668901	0.414339	0.601788	0.0825698	0.226427	0.550563	0.69475	0.483854	0.269497	0.976188	0.995254	0.0166077	0.0300731	0.803357	0.349344	0.0282686	0.23207	0.115968	0.69618	0.95416	0.87577	0.155167	0.240583	0.799259	0.383275	0.285989	0.916981	-5.33056
CS(=O)(=O)CC(=O)NCCn1ccc2ncnc(Nc3ccc(Oc4cccc(C(F)(F)F)c4)c(Cl)c3)c21	CHEMBL2148044	6.3	nM	8.20066	567.095	8	2	4.8002	TRUE	567.977	4.8002	8	2	3	0.298415	0	115.21	0.143217	0.793466	0.7538	0.717179	0.943464	0.318522	0.851062	0.217642	0.616349	0.699913	0.987936	0.383815	0.34694	0.957034	0.997691	0.0106466	0.0146907	0.107188	0.265465	0.0163856	0.0475886	0.236381	0.622706	0.874788	0.674833	0.0188375	0.0840385	0.60326	0.264282	0.0918767	0.92434	-5.27291
Cc1cc(Nc2ncnc3cc(O)c(NC(=O)/C=C/[C@H]4CCCN4C)cc23)ccc1Oc1ccn2cnnc2c1	CHEMBL5180965	6.31	nM	8.19997	536.228	10	3	4.81132	TRUE	536.596	4.81132	10	3	3	0.198115	1	129.8	0.565733	0.272548	0.763852	0.0780853	0.176059	0.318513	0.185645	0.194611	0.138405	0.75581	0.574893	0.254767	0.66109	0.941127	0.97653	0.0241445	0.0167716	0.245165	0.053259	0.0460723	0.149555	0.0348548	0.700084	0.82658	0.500202	0.184521	0.113299	0.309503	0.46179	0.146228	0.753924	-5.88474
C=CC(=O)Nc1cc2c(Nc3cccc(Br)c3)ncnc2cc1OCCCN1CCOCC1	CHEMBL31419	6.4	nM	8.19382	511.122	7	2	4.3615	TRUE	512.408	4.3615	7	2	3	0.325453	0	88.61	0.674412	0.805116	0.724411	0.386751	0.550866	0.136386	0.342091	0.300267	0.506723	0.623346	0.786306	0.320221	0.819957	0.910629	0.986834	0.0327281	0.0192267	0.574902	0.261337	0.0877289	0.129203	0.0624398	0.689603	0.876201	0.776785	0.184799	0.233887	0.40825	0.673742	0.42913	0.930497	-4.98677
Cc1cc(Nc2ncnc3ccc(NC4=NC(C)(C)CO4)cc23)ccc1Oc1ccn2ncnc2c1	CHEMBL3989868	6.9	nM	8.16115	480.202	10	2	5.09352	TRUE	480.532	5.09352	10	2	3	0.357724	0	110.85	0.23693	0.354192	0.937912	0.177733	0.407646	0.386491	0.450387	0.209654	0.10003	0.775593	0.648375	0.440333	0.492563	0.948814	0.995773	0.00978848	0.0166135	0.364877	0.313793	0.028263	0.0954019	0.0747165	0.80723	0.902828	0.657912	0.169457	0.111602	0.667853	0.301562	0.106773	0.904762	-5.94565
C#Cc1cccc(Nc2ncnn3ccc(CN4CCC(N)CC4)c23)c1	CHEMBL1645466	7	nM	8.1549	346.191	6	2	2.3773	TRUE	346.438	2.3773	6	2	4	0.709886	0	71.48	0.418122	0.96628	0.906409	0.338501	0.0657564	0.114478	0.0448018	0.593882	0.764277	0.419525	0.459073	0.190496	0.844223	0.403683	0.999553	0.0360888	0.0625858	0.369087	0.083367	0.029689	0.174202	0.00111886	0.753022	0.1518	0.152535	0.0202474	0.00549765	0.0173136	0.0278129	0.259281	0.929778	-5.48272
Nc1ncnc(Nc2ccc3c(cnn3Cc3cccc(F)c3)c2)c1/C=N/N1CCOCC1	CHEMBL498133	7	nM	8.1549	446.198	9	2	3.0056	TRUE	446.49	3.0056	9	2	4	0.438636	0	106.48	0.537502	0.736407	0.927363	0.168622	0.710223	0.22096	0.507884	0.10916	0.069941	0.623649	0.932854	0.316575	0.640316	0.964494	0.999403	0.00441398	0.0215513	0.634343	0.458154	0.024794	0.067092	0.0298814	0.886266	0.620971	0.60213	0.115276	0.0373038	0.268762	0.142827	0.17846	0.938795	-5.17004
CCO/N=C/c1c(N)ncnc1Nc1ccc2c(cnn2Cc2cccc(F)c2)c1	CHEMBL402294	7	nM	8.1549	405.171	8	2	3.7099	TRUE	405.437	3.7099	8	2	4	0.358864	0	103.24	0.472754	0.743585	0.89193	0.460159	0.877987	0.280274	0.53361	0.221434	0.259506	0.678033	0.964062	0.403927	0.340565	0.921632	0.999132	0.00950218	0.0343491	0.686625	0.414205	0.0295645	0.123845	0.0360729	0.864424	0.716927	0.567095	0.1551	0.0484327	0.2727	0.0927717	0.186609	0.915209	-5.37696
C=CC(=O)Nc1cc2c(Nc3ccc(F)c(Cl)c3)ncnc2cc1OCc1cn(CCCCC(=O)NO)nn1	CHEMBL4744985	7.3	nM	8.13668	554.159	10	4	4.1366	TRUE	554.97	4.1366	10	4	3	0.0874117	0	156.18	0.892176	0.505706	0.832653	0.111912	0.560718	0.124422	0.448012	0.067182	0.320006	0.807023	0.92834	0.397497	0.732273	0.943929	0.992291	0.00871288	0.00854542	0.281526	0.140846	0.0554262	0.0926611	0.074384	0.639262	0.867074	0.690205	0.129275	0.0660418	0.246643	0.535408	0.249621	0.845686	-5.60616
CN1C[C@@H](OC(=O)N2CCCCC2)C[C@H](C(=O)NO)[C@H]1C(=O)N1CCN(c2ccccc2)CC1	CHEMBL584116	7.3	nM	8.13668	473.264	7	2	1.152	TRUE	473.574	1.152	7	2	4	0.49926	3	105.66	0.291429	0.63449	0.510846	0.00409803	0.208088	0.216002	0.0350216	0.165849	0.0326622	0.813903	0.324647	0.0671006	0.733838	0.549011	0.930297	0.00751418	0.046749	0.0198317	0.0051982	0.0103998	0.0622285	0.0150029	0.871942	0.172279	0.377064	0.0426295	0.0112777	0.0149911	0.147328	0.19621	0.590235	-5.19248
C=CC(=O)Nc1ccc2ncnc(Nc3ccc(F)c(Br)c3)c2c1	CHEMBL280757	7.3	nM	8.13668	386.018	4	2	4.3995	TRUE	387.212	4.3995	4	2	4	0.651667	0	66.91	0.506788	0.877941	0.917737	0.907252	0.763712	0.332838	0.327733	0.195448	0.483239	0.608564	0.863446	0.242733	0.289842	0.978283	0.999608	0.0835618	0.0849196	0.90641	0.353549	0.0530217	0.283486	0.133493	0.894247	0.448229	0.816996	0.460513	0.282086	0.769714	0.728343	0.317075	0.640011	-4.91416
C=CC(=O)Nc1ccc2ncnc(Nc3ccc(OCc4ccccc4)cc3)c2c1	CHEMBL430571	7.6	nM	8.11919	396.159	5	2	5.0769	TRUE	396.45	5.0769	5	2	3	0.426304	0	76.14	0.723542	0.507204	0.840762	0.49935	0.735876	0.383077	0.442747	0.168963	0.380727	0.653417	0.635256	0.453176	0.223934	0.968787	0.983072	0.0351033	0.065145	0.788112	0.41155	0.105338	0.388265	0.133922	0.764707	0.901251	0.893926	0.362072	0.39202	0.79144	0.67588	0.308568	0.839032	-5.15164
OCCNCCn1ccc2ncnc(Nc3ccc(Oc4cccc(C(F)(F)F)c4)c(Cl)c3)c21	CHEMBL1923013	7.7	nM	8.11351	491.134	7	3	5.2213	TRUE	491.901	5.2213	7	3	3	0.278321	0	84.23	0.23727	0.680975	0.74006	0.878974	0.808367	0.164472	0.477247	0.438699	0.823119	0.639325	0.954116	0.401411	0.581153	0.826575	0.998676	0.018092	0.0182208	0.432096	0.545651	0.0184165	0.083782	0.103939	0.770318	0.955846	0.552406	0.0165398	0.134436	0.757917	0.320638	0.13076	0.98174	-5.23246
C=CC(=O)Nc1cccc(-c2c[nH]c3ncnc(Nc4ccc5c(ccn5Cc5ccccc5)c4)c23)c1	CHEMBL4758224	7.9	nM	8.10237	484.201	5	3	6.496	TRUE	484.563	6.496	5	3	3	0.225892	0	87.63	0.391178	0.562593	0.681635	0.794627	0.870544	0.287335	0.566279	0.251897	0.657152	0.652793	0.849955	0.329933	0.331046	0.946163	0.996068	0.038911	0.0238399	0.806023	0.466474	0.0635547	0.182151	0.0810622	0.743003	0.956859	0.783307	0.167777	0.358543	0.78727	0.620904	0.281637	0.95423	-5.50067
C[C@@H](Oc1cccc2ncnc(Nc3ccc4c(cnn4Cc4cccc(F)c4)c3)c12)C(=O)N(C)C	CHEMBL256783	8	nM	8.09691	484.202	7	1	4.766	TRUE	484.535	4.766	7	1	4	0.358392	1	85.17	0.492989	0.611231	0.941019	0.237222	0.684651	0.575245	0.473945	0.208264	0.201821	0.808431	0.968975	0.510331	0.533565	0.971534	0.999482	0.00509054	0.0166522	0.374585	0.260241	0.00632775	0.0521148	0.036523	0.919064	0.951324	0.69434	0.0243698	0.0209566	0.452471	0.0621804	0.108834	0.95809	-5.03211
N#Cc1ccccc1Oc1ccc(Nc2ncnc3cc[nH]c23)cc1Cl	CHEMBL1922901	8	nM	8.09691	361.073	5	2	5.01888	TRUE	361.792	5.01888	5	2	3	0.532644	0	86.62	0.546466	0.648655	0.916412	0.979201	0.895035	0.247904	0.660095	0.27906	0.377827	0.667156	0.900705	0.175265	0.183033	0.982913	0.999957	0.0151688	0.0204067	0.951334	0.812701	0.126778	0.180535	0.172743	0.914745	0.698231	0.816286	0.430697	0.308431	0.897569	0.762556	0.205105	0.869993	-5.18611
CN1CCN(/N=C/c2c(N)ncnc2Nc2ccc3c(cnn3Cc3cccc(F)c3)c2)CC1	CHEMBL498134	8	nM	8.09691	459.23	9	2	2.9208	TRUE	459.533	2.9208	9	2	4	0.427738	0	100.49	0.417407	0.714415	0.890034	0.102789	0.495473	0.368827	0.247734	0.31961	0.145268	0.752334	0.927071	0.384958	0.793522	0.945613	0.998535	0.00475257	0.0196288	0.447224	0.204241	0.0164986	0.0316711	0.0120117	0.885942	0.664164	0.406151	0.032139	0.0140831	0.143789	0.0738215	0.157184	0.969672	-5.41302
C=CC(=O)Nc1cc2c(Nc3cccc(Cl)c3F)ncnc2cc1OCc1cn(CCCC(=O)NO)nn1	CHEMBL4794998	8	nM	8.09691	540.144	10	4	3.7465	TRUE	540.943	3.7465	10	4	3	0.126291	0	156.18	0.88853	0.532425	0.877693	0.132921	0.413609	0.168473	0.365	0.0569573	0.221904	0.718826	0.930354	0.35541	0.657207	0.964131	0.995137	0.0127614	0.0074832	0.198927	0.125932	0.0415614	0.0877628	0.119963	0.669139	0.841227	0.678706	0.12192	0.0468569	0.203985	0.452606	0.257487	0.754305	-5.60211
Nc1ncnc(Nc2ccc3c(cnn3Cc3cccc(F)c3)c2)c1/C=N/N1CCN(CCO)CC1	CHEMBL514566	8	nM	8.09691	489.24	10	3	2.2833	TRUE	489.559	2.2833	10	3	4	0.322565	0	120.72	0.293404	0.460025	0.732907	0.0764763	0.465746	0.323426	0.38283	0.381053	0.154774	0.59026	0.85931	0.370491	0.757276	0.902625	0.997166	0.00764285	0.020812	0.561631	0.155111	0.0140015	0.031874	0.00655139	0.691401	0.708395	0.342149	0.0239928	0.0147587	0.205304	0.0834664	0.145736	0.984548	-5.64716
C=CC(=O)N1CCC[C@@H](n2nc(-c3ccc(OCc4ccccn4)c(Cl)c3)c3c(N)ncnc32)C1	CHEMBL4068839	8.1	nM	8.09151	489.168	8	1	4.0524	TRUE	489.967	4.0524	8	1	4	0.40634	1	112.05	0.25632	0.78522	0.807465	0.136095	0.728313	0.117989	0.625311	0.107367	0.144374	0.787684	0.924009	0.123694	0.557726	0.92993	0.999193	0.015472	0.0226808	0.317962	0.425076	0.0472814	0.155653	0.0755288	0.93853	0.792944	0.846984	0.0867114	0.0734108	0.189815	0.219954	0.185553	0.816192	-5.39091
COC(=O)N1C[C@@H](OC(=O)N2CCCC2)C[C@H](C(=O)NO)[C@H]1C(=O)N1CCN(c2ccccc2)CC1	CHEMBL585886	8.1	nM	8.09151	503.238	8	2	0.8985	TRUE	503.556	0.8985	8	2	3	0.457664	3	131.96	0.304225	0.525882	0.412272	0.00205291	0.173334	0.181259	0.0684223	0.100914	0.01925	0.801915	0.296169	0.0440243	0.536183	0.654771	0.87733	0.0120767	0.0577054	0.0202483	0.00948279	0.0243346	0.0954272	0.0111008	0.820643	0.206363	0.417791	0.0477114	0.00933562	0.012536	0.186114	0.14255	0.587537	-5.0849
O=C(/C=C/C(=O)Nc1cc2c(Nc3cccc(Br)c3)ncnc2cn1)NCCCn1ccnc1	CHEMBL342828	8.1	nM	8.09151	520.097	8	3	3.4286	TRUE	521.379	3.4286	8	3	3	0.227611	0	126.72	0.561389	0.539871	0.622846	0.304325	0.85663	0.148637	0.780499	0.0910445	0.739181	0.51034	0.895965	0.178763	0.580394	0.91967	0.98902	0.020698	0.0127024	0.690033	0.296023	0.0405365	0.0884146	0.0748156	0.612101	0.910404	0.731108	0.148868	0.303833	0.480692	0.415948	0.402487	0.926012	-5.85442
C=CC(=O)Nc1cc2c(Nc3ccc(F)c(Br)c3)ncnc2cc1OCCCN1CCOCC1	CHEMBL27685	8.2	nM	8.08619	529.112	7	2	4.5006	TRUE	530.398	4.5006	7	2	3	0.311254	0	88.61	0.599308	0.783327	0.792016	0.207453	0.419165	0.17106	0.298093	0.261042	0.359291	0.689011	0.838352	0.350686	0.841024	0.937318	0.988442	0.0254234	0.019303	0.551413	0.201647	0.0544573	0.110139	0.0667757	0.69126	0.849987	0.716953	0.185994	0.168377	0.453244	0.668781	0.278566	0.93508	-4.91794
N#Cc1cccc(Oc2ccc(Nc3ncnc4cc[nH]c34)cc2Cl)c1	CHEMBL1922902	8.2	nM	8.08619	361.073	5	2	5.01888	TRUE	361.792	5.01888	5	2	3	0.532644	0	86.62	0.524737	0.507904	0.924064	0.975866	0.853657	0.202843	0.625868	0.249418	0.347386	0.64659	0.88121	0.194226	0.168331	0.983401	0.999937	0.0166408	0.0262675	0.948678	0.796339	0.123584	0.224624	0.124442	0.887616	0.644323	0.820396	0.492988	0.25895	0.908703	0.783945	0.184021	0.852731	-5.18884
Clc1cccc(Oc2ccc(Nc3ncnc4cc[nH]c34)cc2Cl)c1	CHEMBL1921812	8.3	nM	8.08092	370.039	4	2	5.8006	TRUE	371.227	5.8006	4	2	3	0.47589	0	62.83	0.513922	0.701547	0.896202	0.99266	0.960057	0.228825	0.662907	0.275439	0.722211	0.547449	0.862642	0.203941	0.0856263	0.974522	0.999971	0.0148919	0.0276252	0.957382	0.690416	0.105981	0.40035	0.112035	0.919994	0.700957	0.84617	0.35076	0.434161	0.875348	0.487035	0.332788	0.804055	-5.08487
CC(C)OC(=O)N(C)C1CN[C@H](C(=O)N2CC=C(c3ccccc3)CC2)[C@@H](C(=O)NO)C1	CHEMBL572301	8.5	nM	8.07058	444.237	6	3	1.6312	TRUE	444.532	1.6312	6	3	4	0.470292	3	111.21	0.656092	0.695749	0.708058	0.0140313	0.193885	0.161087	0.0503198	0.0943485	0.0479618	0.775702	0.535878	0.0935167	0.667503	0.592636	0.984653	0.00417075	0.0205539	0.0661468	0.0140123	0.010387	0.0640899	0.00818753	0.87731	0.173498	0.25889	0.0251072	0.0122728	0.0082905	0.120846	0.271564	0.445536	-5.30148
C=CC(=O)Nc1ccc2ncnc(Nc3ccc(Oc4ccccc4)cc3)c2c1	CHEMBL53203	8.6	nM	8.0655	382.143	5	2	5.2902	TRUE	382.423	5.2902	5	2	3	0.443204	0	76.14	0.75428	0.677051	0.864298	0.61629	0.776673	0.412901	0.475524	0.199066	0.439709	0.655643	0.704355	0.419648	0.295151	0.975049	0.994259	0.03375	0.0615079	0.823074	0.443938	0.0924698	0.334711	0.134556	0.84573	0.874639	0.890985	0.311142	0.404751	0.808461	0.68689	0.337567	0.834286	-5.03003
C=CC(=O)Nc1cc2c(Nc3cccc(C)c3)ncnc2cn1	CHEMBL54088	8.8	nM	8.05552	305.128	5	2	3.20132	TRUE	305.341	3.20132	5	2	4	0.723537	0	79.8	0.755405	0.757905	0.937766	0.888798	0.482351	0.317589	0.168522	0.229332	0.196459	0.60483	0.586937	0.141239	0.245282	0.968402	0.999816	0.120423	0.095167	0.924561	0.270284	0.0916986	0.439258	0.0965035	0.949992	0.246403	0.797408	0.675368	0.245429	0.794695	0.767756	0.36401	0.504984	-5.00198
NC1CCN(Cc2ccn3ncnc(Nc4ccccc4)c23)CC1	CHEMBL1645467	9	nM	8.04576	322.191	6	2	2.396	TRUE	322.416	2.396	6	2	4	0.771593	0	71.48	0.169527	0.99303	0.882889	0.0857048	0.0459959	0.0859139	0.00910268	0.581362	0.702611	0.431517	0.0427672	0.0959328	0.777101	0.241462	0.999692	0.00622183	0.0277108	0.187333	0.0381685	0.00385236	0.0650876	0.000275808	0.766549	0.152804	0.0638478	0.00335243	0.00361244	0.00514989	0.00459856	0.33735	0.947064	-5.50636
CS(=O)(=O)CCNC(=O)NCc1cccc(C#Cc2cncnc2Nc2ccc(OCc3cccc(F)c3)c(Cl)c2)n1	CHEMBL206029	9	nM	8.04576	608.141	8	3	4.2303	TRUE	609.083	4.2303	8	3	3	0.227723	0	135.2	0.193223	0.491735	0.784976	0.363381	0.924657	0.599	0.877404	0.309903	0.540279	0.790334	0.991619	0.304093	0.462668	0.935421	0.996173	0.00419069	0.00664974	0.161377	0.11764	0.0177691	0.0395841	0.21623	0.576933	0.824719	0.565649	0.0144561	0.148058	0.418454	0.175164	0.0919708	0.851522	-5.1911
CN1CCN(c2ccc(Nc3ncnc4cc5oc(=O)n(CCOC(=O)CCl)c5cc34)cc2Cl)CC1	CHEMBL3921302	9	nM	8.04576	530.124	10	1	3.4685	TRUE	531.4	3.4685	10	1	3	0.283563	0	105.73	0.382791	0.670449	0.611381	0.502858	0.616527	0.170009	0.234915	0.202433	0.30465	0.574458	0.847907	0.233268	0.691381	0.961057	0.988151	0.0564289	0.0345814	0.201589	0.177641	0.0664149	0.102819	0.187432	0.80959	0.703964	0.690998	0.146822	0.142082	0.207819	0.367005	0.340804	0.853215	-5.00273
C=CC(=O)Nc1cc2c(Nc3ccc(F)c(Cl)c3)ncnc2cc1OCCCN1CCOCC1	CHEMBL31965	9	nM	8.04576	485.163	7	2	4.3915	TRUE	485.947	4.3915	7	2	4	0.342973	0	88.61	0.629572	0.734078	0.780872	0.20925	0.450543	0.143071	0.32799	0.23551	0.39549	0.696111	0.86438	0.299974	0.843673	0.942201	0.990102	0.0274212	0.0168866	0.557809	0.331107	0.103949	0.123072	0.0946103	0.705675	0.819982	0.742535	0.182625	0.186358	0.488297	0.661821	0.291989	0.915482	-4.84284
Fc1ccccc1Oc1ccc(Nc2ncnc3cc[nH]c23)cc1Cl	CHEMBL1922898	9.3	nM	8.03152	354.068	4	2	5.2863	TRUE	354.772	5.2863	4	2	3	0.522627	0	62.83	0.558927	0.813365	0.934911	0.982937	0.952657	0.386537	0.71087	0.274957	0.464771	0.616777	0.916753	0.216816	0.107504	0.981937	0.999983	0.0111125	0.0204247	0.964448	0.67483	0.0997809	0.340335	0.168041	0.933051	0.634711	0.835651	0.368104	0.294806	0.832543	0.442572	0.225573	0.80424	-4.88308
C=CC(=O)N1CCC[C@@H](n2nc(-c3ccc(Oc4ccccc4)cc3)c3c(N)ncnc32)C1	CHEMBL1873475	9.4	nM	8.02687	440.196	7	1	4.2173	TRUE	440.507	4.2173	7	1	4	0.466703	1	99.16	0.316337	0.881167	0.813701	0.17948	0.802683	0.206725	0.771812	0.158201	0.14098	0.745975	0.828272	0.149627	0.528043	0.92525	0.999247	0.0140416	0.0307347	0.328205	0.400698	0.0425638	0.149376	0.0795963	0.932929	0.862447	0.854403	0.131533	0.0898093	0.304484	0.230853	0.238727	0.891816	-5.20105
CN(C(=O)c1ccccc1)C1CN[C@H](C(=O)N2CC=C(c3ccccc3)CC2)[C@@H](C(=O)NO)C1	CHEMBL570760	10	nM	8	462.227	5	3	1.9266	TRUE	462.55	1.9266	5	3	4	0.465612	3	101.98	0.481071	0.481088	0.748044	0.0257859	0.254463	0.242562	0.108398	0.114821	0.0964992	0.758493	0.618137	0.209897	0.638077	0.786336	0.975178	0.00576465	0.0157514	0.0699892	0.0223064	0.00648573	0.070295	0.0116231	0.826578	0.389485	0.316866	0.0333734	0.0270852	0.0409165	0.0500831	0.371134	0.625355	-5.6865
O=C(CNCCO)Nc1ccc2ncnc(Nc3ccc(OCc4cccc(F)c4)c(Cl)c3)c2c1	CHEMBL4783947	10.4	nM	7.98297	495.147	7	4	4.2653	TRUE	495.942	4.2653	7	4	4	0.243288	0	108.4	0.243322	0.30831	0.717939	0.488505	0.78207	0.33003	0.633888	0.202717	0.460171	0.746501	0.905955	0.356075	0.335263	0.939221	0.996498	0.0092299	0.0139511	0.698873	0.26909	0.0143663	0.0726451	0.0644245	0.67053	0.887276	0.536684	0.0276708	0.152867	0.548223	0.378743	0.144234	0.962724	-5.43186
COc1cc2ncnc(Nc3ccc(F)c(Cl)c3)c2cc1OCCC(=O)NO	CHEMBL597551	10.6	nM	7.97469	406.084	7	3	3.4488	TRUE	406.801	3.4488	7	3	4	0.407323	0	105.6	0.860667	0.76881	0.961128	0.659735	0.473266	0.249649	0.210249	0.1458	0.136987	0.716834	0.930457	0.168723	0.518818	0.984309	0.999787	0.0174912	0.00938568	0.838728	0.277887	0.0550581	0.0916049	0.0750988	0.928793	0.415778	0.731128	0.212648	0.0468206	0.185975	0.575246	0.23522	0.696519	-5.13272
Cc1cc(Nc2c(C#N)cnc3ccc(NC(=O)/C=C/[C@H]4CCCN4C)cc23)ccc1Oc1cc2nncn2cn1	CHEMBL5209046	10.77	nM	7.96778	545.229	10	2	4.9774	TRUE	545.607	4.9774	10	2	3	0.271715	1	133.36	0.411305	0.329817	0.874123	0.0316053	0.16703	0.247029	0.274171	0.154286	0.0643852	0.82569	0.764786	0.359292	0.807899	0.976566	0.982359	0.0160543	0.0193686	0.247658	0.0958281	0.0186236	0.046971	0.0589611	0.797439	0.912666	0.674664	0.197868	0.0594454	0.517877	0.620922	0.115454	0.897514	-5.49284
Cn1ccc2ncnc(Nc3ccc(Oc4cccc(C(F)(F)F)c4)c(Cl)c3)c21	CHEMBL1923004	11	nM	7.95861	418.081	5	1	6.1764	TRUE	418.806	6.1764	5	1	3	0.429903	0	51.97	0.198665	0.825428	0.914316	0.967454	0.911598	0.299977	0.529771	0.204445	0.350082	0.649912	0.764977	0.37121	0.138267	0.919292	0.999926	0.0211726	0.0290826	0.715661	0.681963	0.0705273	0.258023	0.248227	0.920474	0.957977	0.855633	0.104138	0.235732	0.849062	0.424302	0.127028	0.871107	-4.90748
CN(C)C/C=C/C(=O)Nc1cc2c(Nc3ccc(Cc4ccccn4)cc3)ncnc2cn1	CHEMBL3969056	11	nM	7.95861	439.212	7	2	3.8105	TRUE	439.523	3.8105	7	2	4	0.403116	0	95.93	0.522731	0.625452	0.816067	0.114575	0.159328	0.275113	0.0692903	0.165133	0.239357	0.690007	0.414947	0.34556	0.732069	0.876138	0.932551	0.0489284	0.0490296	0.300518	0.0950758	0.0416089	0.1058	0.0247138	0.782699	0.607123	0.32778	0.126914	0.0806902	0.221153	0.27847	0.179404	0.81519	-5.59552
O=C(NO)[C@H]1C[C@H](OC(=O)N2CCCC2)CN[C@@H]1C(=O)N1CC=C(c2ccccc2)C1	CHEMBL568346	11	nM	7.95861	428.206	6	3	0.9967	TRUE	428.489	0.9967	6	3	4	0.487392	3	111.21	0.572534	0.64099	0.691285	0.0193751	0.134292	0.112755	0.0425705	0.140176	0.0343402	0.663293	0.239548	0.0728163	0.688598	0.531357	0.943951	0.0223407	0.0413964	0.0405836	0.0101364	0.0212049	0.185739	0.0150009	0.690255	0.0723241	0.374159	0.120986	0.0146632	0.00844618	0.258145	0.267947	0.446701	-5.45431
Cc1ccc(Oc2ccc(Nc3ncnc4[nH]nc(OCCN5CCC(O)CC5)c34)cc2C)cn1	CHEMBL257872	11	nM	7.95861	475.233	9	3	3.73614	TRUE	475.553	3.73614	9	3	4	0.349812	0	121.31	0.153928	0.452616	0.792187	0.139237	0.139507	0.0951901	0.121787	0.420041	0.380575	0.749113	0.37842	0.184691	0.752708	0.728187	0.990109	0.0145228	0.0236058	0.490132	0.0315962	0.010458	0.0982334	0.00435327	0.674703	0.540303	0.228612	0.0351184	0.0274225	0.216663	0.192045	0.120091	0.92006	-5.62998
Clc1ccccc1Oc1ccc(Nc2ncnc3cc[nH]c23)cc1Cl	CHEMBL1922900	11	nM	7.95861	370.039	4	2	5.8006	TRUE	371.227	5.8006	4	2	3	0.47589	0	62.83	0.60204	0.731959	0.898597	0.987396	0.949384	0.282441	0.640748	0.258917	0.564643	0.576799	0.802677	0.239687	0.0882137	0.975286	0.999954	0.012275	0.0220418	0.956035	0.72425	0.122223	0.357748	0.156864	0.920634	0.699674	0.844064	0.355526	0.477717	0.876296	0.505162	0.375774	0.820993	-5.06657
O[C@H]1CN[C@H](C#Cc2cc3ncnc(Nc4ccc(OCc5cccc(F)c5)c(Cl)c4)c3s2)C1	CHEMBL497804	11	nM	7.95861	494.098	7	3	4.8807	TRUE	494.979	4.8807	7	3	4	0.343103	2	79.3	0.338444	0.290713	0.784708	0.494146	0.788071	0.312388	0.7659	0.160605	0.307461	0.598398	0.855423	0.206704	0.238224	0.963928	0.999494	0.0166966	0.0144575	0.730406	0.595788	0.0202476	0.132346	0.244282	0.70906	0.975528	0.863135	0.129336	0.472946	0.892747	0.531345	0.276638	0.910702	-5.47192
OCCOCCn1ccc2ncnc(Nc3cnc(Oc4cccc(C(F)(F)F)c4)c(Cl)c3)c21	CHEMBL1614726	11	nM	7.95861	493.113	8	2	5.0433	TRUE	493.873	5.0433	8	2	3	0.315242	0	94.32	0.107242	0.67283	0.759812	0.627236	0.666902	0.127209	0.683192	0.18035	0.207791	0.676116	0.876478	0.246988	0.34938	0.935974	0.99909	0.0142874	0.0180027	0.39732	0.565702	0.0152898	0.0552718	0.134325	0.883067	0.902748	0.674771	0.0200218	0.0930336	0.689443	0.355066	0.104618	0.932813	-5.15155
C=CC(=O)Nc1cccc(-c2c[nH]c3ncnc(Nc4ccc(OCc5ccccn5)c(Cl)c4)c23)c1	CHEMBL4787483	11	nM	7.95861	496.141	6	3	6.1204	TRUE	496.958	6.1204	6	3	3	0.223422	0	104.82	0.456082	0.320772	0.793582	0.651473	0.874693	0.287723	0.642976	0.171469	0.54523	0.710893	0.886268	0.339169	0.41267	0.959709	0.99558	0.0149964	0.0160985	0.792246	0.390394	0.0592347	0.163238	0.127219	0.707251	0.904675	0.794795	0.117733	0.361344	0.69114	0.630636	0.213743	0.884877	-5.63866
CN1C[C@@H](OC(=O)N2CCCC2)C[C@H](C(=O)NO)[C@H]1C(=O)N1CCN(c2ccccc2)CC1	CHEMBL585299	11.5	nM	7.9393	459.248	7	2	0.7619	TRUE	459.547	0.7619	7	2	4	0.505934	3	105.66	0.309907	0.652624	0.520729	0.00275691	0.159559	0.208628	0.0241122	0.136291	0.0207217	0.805667	0.166493	0.0662503	0.715572	0.5321	0.913537	0.00824259	0.0489275	0.0162289	0.00447854	0.00912182	0.0630119	0.0122947	0.836693	0.109096	0.327785	0.0389556	0.00927925	0.0090572	0.134306	0.197467	0.515608	-5.20467
COCC(=O)NC/C=C/c1ccc2ncnc(Nc3ccc(Oc4ccc(C)nc4)c(C)c3)c2c1	CHEMBL483321	12	nM	7.92082	469.211	7	2	4.95334	TRUE	469.545	4.95334	7	2	4	0.357714	0	98.26	0.644666	0.437772	0.8664	0.187751	0.538839	0.278207	0.365504	0.210358	0.211472	0.877926	0.916876	0.308133	0.527021	0.931028	0.996486	0.0205646	0.0263381	0.6714	0.262785	0.0637256	0.121235	0.0706945	0.903771	0.916896	0.745272	0.151462	0.190403	0.447884	0.461561	0.126619	0.921984	-5.3046
CO/N=C/c1c(N)ncnc1Nc1ccc2c(cnn2Cc2cccc(F)c2)c1	CHEMBL255871	12	nM	7.92082	391.156	8	2	3.3198	TRUE	391.41	3.3198	8	2	4	0.386033	0	103.24	0.525062	0.75729	0.89722	0.499138	0.804338	0.277737	0.359904	0.225321	0.230975	0.620188	0.953962	0.395423	0.348546	0.931415	0.999009	0.0118708	0.0405982	0.6689	0.374274	0.0310262	0.136826	0.0300953	0.826936	0.619495	0.505264	0.159235	0.0411335	0.209967	0.0900571	0.195883	0.89704	-5.37529
C=CC(=O)Nc1cccc(-c2c[nH]c3ncnc(Nc4ccc5c(cnn5Cc5ccccc5)c4)c23)c1	CHEMBL4778909	12	nM	7.92082	485.196	6	3	5.891	TRUE	485.551	5.891	6	3	3	0.244844	0	100.52	0.319402	0.50065	0.728248	0.66867	0.829205	0.320856	0.725528	0.238904	0.435747	0.653335	0.853721	0.37999	0.417956	0.958869	0.99556	0.0208554	0.0200536	0.693946	0.401436	0.0402123	0.122626	0.066806	0.731536	0.921369	0.757104	0.14252	0.193325	0.780367	0.5984	0.228258	0.955156	-5.57826
C=CC(=O)Nc1nc2c(Nc3ccc(F)c(Cl)c3)ncnc2cc1/C=C/CCN1CCOCC1	CHEMBL417478	12	nM	7.92082	482.163	7	2	4.4209	TRUE	482.947	4.4209	7	2	4	0.458942	0	92.27	0.646813	0.715885	0.761095	0.221999	0.482527	0.0871204	0.392703	0.126062	0.297547	0.554958	0.806372	0.184017	0.768872	0.95579	0.994207	0.10139	0.0229665	0.673959	0.488456	0.120706	0.131059	0.244608	0.837212	0.844052	0.834105	0.438156	0.324819	0.684922	0.744692	0.411931	0.858043	-5.02186
OCCn1ccc2ncnc(Nc3ccc(Oc4cccc(C(F)(F)F)c4)c(Cl)c3)c21	CHEMBL1923007	12	nM	7.92082	448.091	6	2	5.6317	TRUE	448.832	5.6317	6	2	3	0.399631	0	72.2	0.0985314	0.655053	0.824473	0.936839	0.915472	0.240385	0.751167	0.194737	0.442549	0.582802	0.888469	0.268968	0.144467	0.931861	0.999794	0.0155584	0.0229722	0.621517	0.723862	0.0195558	0.123186	0.238618	0.892843	0.934575	0.708702	0.0322776	0.184684	0.889271	0.430355	0.0985002	0.928288	-5.03232
Nc1nccc(C#Cc2cncnc2Nc2ccc(OCc3cccc(F)c3)c(Cl)c2)n1	CHEMBL381604	12	nM	7.92082	446.106	7	2	4.3637	TRUE	446.873	4.3637	7	2	4	0.439142	0	98.84	0.401916	0.47546	0.90144	0.307206	0.906872	0.271686	0.735765	0.0870318	0.456946	0.710023	0.96116	0.301884	0.318789	0.963693	0.999278	0.00294344	0.0117357	0.722048	0.584894	0.0315027	0.0942113	0.0824613	0.76651	0.621365	0.615429	0.0428537	0.176154	0.48007	0.213146	0.18768	0.860276	-5.23167
C[C@H](Oc1cccc2ncnc(Nc3ccc4c(cnn4Cc4nccs4)c3)c12)C(=O)N1CCOCC1	CHEMBL404181	12	nM	7.92082	515.174	10	1	3.854	TRUE	515.599	3.854	10	1	3	0.348322	1	107.29	0.28109	0.411496	0.901998	0.128802	0.569702	0.404514	0.576565	0.133494	0.0376613	0.598569	0.949414	0.244501	0.428807	0.985662	0.998542	0.00480828	0.0120373	0.327031	0.194675	0.0137844	0.106755	0.084554	0.812246	0.736467	0.732064	0.0532121	0.0435857	0.367441	0.231342	0.13848	0.850097	-5.16928
C=CC(=O)Nc1ccc2ncnc(Nc3ccc(F)c(Cl)c3)c2n1	CHEMBL28418	12	nM	7.92082	343.064	5	2	3.6854	TRUE	343.749	3.6854	5	2	4	0.706202	0	79.8	0.606263	0.795032	0.907848	0.846468	0.532582	0.188541	0.337323	0.124546	0.262081	0.539191	0.736795	0.133546	0.282434	0.988326	0.999784	0.15174	0.0625142	0.934568	0.525065	0.126452	0.304769	0.294874	0.94222	0.38125	0.919037	0.690256	0.331429	0.827962	0.815943	0.443433	0.469365	-4.82447
COc1cc2ncnc(Nc3ccc(F)c(Cl)c3)c2cc1OCCCC(=O)NO	CHEMBL597752	12.4	nM	7.90658	420.1	7	3	3.8389	TRUE	420.828	3.8389	7	3	4	0.288606	0	105.6	0.845306	0.796424	0.938916	0.560648	0.59559	0.217869	0.341173	0.169292	0.175264	0.788673	0.938525	0.182842	0.601294	0.970797	0.999655	0.010917	0.00857157	0.829091	0.301647	0.0570239	0.0907891	0.0528542	0.931812	0.628642	0.754149	0.171159	0.0515249	0.22478	0.54023	0.226277	0.834943	-5.19969
Fc1cccc(COc2ccc(Nc3ncnc4cc[nH]c34)cc2Cl)c1	CHEMBL1923000	13	nM	7.88606	368.084	4	2	5.073	TRUE	368.799	5.073	4	2	3	0.515746	0	62.83	0.490876	0.670412	0.909413	0.984891	0.968621	0.364426	0.731118	0.270528	0.569952	0.59782	0.933231	0.194322	0.0868338	0.968739	0.999972	0.0137852	0.0246412	0.948325	0.655244	0.113872	0.415491	0.173699	0.891588	0.740392	0.834348	0.37521	0.364252	0.793633	0.440416	0.221425	0.795321	-5.16223
OCc1cccc(C#Cc2cncnc2Nc2ccc(OCc3cccc(F)c3)c(Cl)c2)n1	CHEMBL204570	13	nM	7.88606	460.11	6	2	4.8788	TRUE	460.896	4.8788	6	2	4	0.399152	0	80.16	0.191197	0.173294	0.844881	0.477695	0.916022	0.395459	0.879958	0.103639	0.369408	0.759512	0.919138	0.289086	0.11732	0.936417	0.999656	0.00370033	0.00714981	0.717197	0.622099	0.0143622	0.0702724	0.229676	0.804213	0.914835	0.665468	0.0256712	0.454801	0.815912	0.372406	0.1271	0.865112	-5.16868
Cc1cncc(Cn2ncc3cc(Nc4ncnn5ccc(CN6CCC(N)CC6)c45)ccc32)c1	CHEMBL248114	13	nM	7.88606	467.255	9	2	3.49742	TRUE	467.581	3.49742	9	2	4	0.394022	0	102.19	0.217087	0.826816	0.846972	0.123209	0.190418	0.0795237	0.190519	0.366559	0.555685	0.71844	0.845155	0.186149	0.870789	0.58668	0.999059	0.0104856	0.0164625	0.318012	0.156717	0.0165244	0.0605201	0.00238542	0.835167	0.574413	0.247403	0.0158831	0.0239972	0.0722273	0.0385582	0.20871	0.9702	-6.24358
CC(=O)c1ccc2[nH]c3nccc(Nc4cccc(O)c4)c3c2c1	CHEMBL3133816	13	nM	7.88606	317.116	4	3	4.3679	TRUE	317.348	4.3679	4	3	4	0.490342	0	78.01	0.735049	0.434943	0.791247	0.996217	0.757214	0.169981	0.430077	0.403459	0.774611	0.390436	0.819668	0.0539172	0.0372412	0.958756	0.999978	0.0866873	0.0253632	0.985876	0.357814	0.211062	0.407328	0.0562627	0.934275	0.587922	0.926076	0.571715	0.304187	0.97528	0.801354	0.551599	0.718301	-5.45336
CC(=O)Nc1cccc(C#Cc2cncnc2Nc2ccc(OCc3cccc(F)c3)c(Cl)c2)c1	CHEMBL205798	13	nM	7.88606	486.126	5	2	5.9499	TRUE	486.934	5.9499	5	2	3	0.32927	0	76.14	0.299809	0.304178	0.831515	0.297205	0.944485	0.36481	0.885453	0.0843886	0.415498	0.822283	0.923759	0.42392	0.142731	0.950515	0.999146	0.00345177	0.00958771	0.589961	0.435534	0.0298417	0.134842	0.144736	0.700207	0.938423	0.778931	0.0303719	0.504973	0.765821	0.416605	0.151236	0.837249	-5.26777
C=CC(=O)Nc1cccc(-c2c[nH]c3ncnc(Nc4ccc(Oc5ccccc5)cc4)c23)c1	CHEMBL4759178	13	nM	7.88606	447.17	5	3	6.2853	TRUE	447.498	6.2853	5	3	3	0.255239	0	91.93	0.499682	0.536001	0.773587	0.674354	0.866973	0.380761	0.660842	0.265139	0.50727	0.670941	0.766731	0.37088	0.341856	0.964775	0.993564	0.0246161	0.031354	0.809208	0.39939	0.0628298	0.201136	0.09831	0.739134	0.945465	0.821568	0.163744	0.359246	0.795352	0.659287	0.28003	0.93076	-5.39605
CN(C)CCCNC(=O)/C=C/C(=O)Nc1cc2c(Nc3cccc(Br)c3)ncnc2cn1	CHEMBL334801	13	nM	7.88606	497.117	7	3	3.0935	TRUE	498.385	3.0935	7	3	4	0.307149	0	112.14	0.627593	0.801458	0.665073	0.0710994	0.230264	0.115623	0.0852018	0.147243	0.304459	0.569684	0.211429	0.338615	0.71066	0.793608	0.809669	0.0932539	0.045238	0.328214	0.068384	0.0682156	0.134214	0.0183728	0.647279	0.613016	0.466821	0.177375	0.0892923	0.156342	0.367808	0.320291	0.793069	-5.68864
C=CC(=O)Nc1cc2c(Nc3cccc(Cl)c3F)ncnc2cc1OCc1cn(CCC(=O)NO)nn1	CHEMBL4759697	13	nM	7.88606	526.128	10	4	3.3564	TRUE	526.916	3.3564	10	4	3	0.138102	0	156.18	0.904839	0.52711	0.883222	0.141179	0.270213	0.163555	0.231623	0.0545871	0.175728	0.645426	0.899861	0.361	0.693086	0.97034	0.992792	0.0153647	0.00639203	0.166437	0.102711	0.0432141	0.0794649	0.105991	0.619211	0.760402	0.627032	0.115081	0.0390774	0.131608	0.414491	0.282904	0.685551	-5.61972
C=CC(=O)N1CCC[C@H](n2nc(C(=O)c3ccc(CC(=O)N(C)C)c(C)c3C)c3c(N)ncnc32)C1	CHEMBL5286014	13	nM	7.88606	489.249	8	1	2.23654	TRUE	489.58	2.23654	8	1	4	0.415421	1	127.31	0.262103	0.848977	0.612924	0.0122814	0.239468	0.126975	0.184849	0.0831306	0.0597529	0.80484	0.908851	0.0847692	0.493281	0.883355	0.998159	0.0288232	0.0421491	0.0837539	0.198827	0.0290952	0.0654633	0.00937404	0.961297	0.592697	0.550819	0.05642	0.0108229	0.0373145	0.0698947	0.144134	0.750428	-5.17998
Fc1cccc(COc2ccc(Nc3ncnc4cc(C#C[C@H]5CCCN5)sc34)cc2Cl)c1	CHEMBL496174	13	nM	7.88606	478.103	6	2	5.9099	TRUE	478.98	5.9099	6	2	3	0.34909	1	59.07	0.486066	0.512025	0.860326	0.519323	0.843378	0.288973	0.75213	0.10706	0.345345	0.656719	0.844422	0.277626	0.252235	0.952772	0.999602	0.0122728	0.0134587	0.707589	0.583225	0.0373569	0.197554	0.30998	0.753462	0.971943	0.926536	0.189543	0.631102	0.824432	0.510827	0.370853	0.838149	-5.28203
COC(=O)CNCc1ccc(-c2cc3c(Nc4ccc(OCc5ccccc5)cc4)ncnc3cn2)o1	CHEMBL488350	13	nM	7.88606	495.191	9	2	4.87	TRUE	495.539	4.87	9	2	4	0.262124	0	111.4	0.342335	0.401354	0.783304	0.649182	0.883249	0.23207	0.777302	0.133915	0.381458	0.589541	0.927742	0.188795	0.281233	0.951664	0.995735	0.0237617	0.0353598	0.559126	0.268878	0.0363055	0.135437	0.195289	0.864916	0.946388	0.724601	0.126752	0.228345	0.544335	0.304755	0.241342	0.944868	-5.3939
CCN(CC)CCCNC(=O)/C=C/C(=O)Nc1cc2c(Nc3cccc(Br)c3)ncnc2cn1	CHEMBL434827	14	nM	7.85387	525.149	7	3	3.8737	TRUE	526.439	3.8737	7	3	3	0.256941	0	112.14	0.7361	0.838337	0.601198	0.144949	0.397579	0.0904793	0.162337	0.186853	0.578421	0.563394	0.265298	0.394123	0.770457	0.722763	0.831519	0.11269	0.0377198	0.39871	0.0938661	0.0780918	0.130384	0.0281804	0.651167	0.762226	0.501126	0.315409	0.121477	0.211518	0.454407	0.421497	0.878189	-5.65216
O=C(/C=C/CN1CCCCC1)Nc1cc2c(Nc3ccc(F)c(Cl)c3)ncnc2cn1	CHEMBL3930506	14	nM	7.85387	440.153	6	2	4.5415	TRUE	440.91	4.5415	6	2	4	0.54733	0	83.04	0.46644	0.892837	0.738116	0.373081	0.650301	0.120026	0.468046	0.259791	0.620024	0.648294	0.661075	0.22042	0.877453	0.879646	0.996628	0.0720156	0.0238316	0.609946	0.20659	0.0711711	0.170821	0.114567	0.906861	0.704962	0.762006	0.250338	0.241335	0.371427	0.469071	0.320215	0.828998	-5.22045
CN(C)CC#CC(=O)Nc1ccc2ncnc(Nc3cccc(Br)c3)c2c1	CHEMBL329856	14	nM	7.85387	423.069	5	2	3.6394	TRUE	424.302	3.6394	5	2	4	0.626346	0	70.15	0.589169	0.901431	0.86529	0.815579	0.495878	0.416514	0.241409	0.408119	0.607763	0.693854	0.769252	0.439307	0.63952	0.946465	0.997592	0.053794	0.0352845	0.702869	0.252335	0.030258	0.137724	0.103023	0.9162	0.766546	0.608377	0.168413	0.226397	0.518438	0.424433	0.389812	0.891391	-5.04359
C=CC(=O)Nc1cccc(-c2c(-c3ccc(N4CCN(C)CC4)cc3)[nH]c3ncnc(OCC)c23)c1	CHEMBL4741898	14	nM	7.85387	482.243	6	2	4.5669	TRUE	482.588	4.5669	6	2	4	0.375555	0	86.38	0.26582	0.51627	0.718487	0.389977	0.438046	0.387081	0.277706	0.379274	0.166697	0.751005	0.636231	0.257115	0.566042	0.968025	0.982765	0.0284364	0.0240606	0.510493	0.167123	0.0370544	0.0687868	0.0386326	0.744987	0.806545	0.63636	0.129928	0.169058	0.455094	0.597901	0.249136	0.898479	-4.98681
Fc1cccc(COc2ccc(Nc3ncnc4sc(-c5ccco5)cc34)cc2Cl)c1	CHEMBL514938	14	nM	7.85387	451.056	6	1	7.0664	TRUE	451.91	7.0664	6	1	3	0.299	0	60.18	0.454626	0.358589	0.834323	0.75791	0.915284	0.378443	0.733678	0.0670514	0.279327	0.601856	0.728974	0.370538	0.0492086	0.975135	0.999778	0.0125817	0.0283781	0.794893	0.481878	0.0577425	0.3944	0.28531	0.715764	0.910069	0.90435	0.145312	0.590517	0.771761	0.441311	0.249852	0.790071	-5.01267
CN(C)C/C=C/C(=O)Nc1cc2c(Nc3ccc(F)c(Cl)c3)ncnc2cc1O[C@@H]1CCOC1	CHEMBL2347958	14	nM	7.85387	485.163	7	2	4.3899	TRUE	485.947	4.3899	7	2	4	0.457293	1	88.61	0.594115	0.649802	0.882845	0.149161	0.263674	0.22445	0.121113	0.192257	0.148339	0.76172	0.714107	0.352821	0.745505	0.962949	0.992247	0.0225599	0.0189035	0.367166	0.252087	0.0427052	0.0770228	0.0795442	0.874141	0.708583	0.681985	0.100643	0.105664	0.267336	0.414428	0.197073	0.80192	-4.99899
C=CC(=O)Nc1cc(-c2c[nH]c3ncnc(Nc4ccc(CN5C(=O)c6ccccc6C5=O)cc4)c23)ccc1OCCO	CHEMBL4783667	15	nM	7.82391	574.196	8	4	4.6603	TRUE	574.597	4.6603	8	4	3	0.138997	0	149.54	0.195687	0.214277	0.576504	0.358628	0.611715	0.326664	0.670749	0.0859883	0.0889914	0.50925	0.734577	0.252094	0.270263	0.987498	0.989854	0.00639026	0.0109972	0.376214	0.203272	0.0115901	0.0411603	0.0397862	0.486782	0.861787	0.487462	0.0506774	0.186629	0.800303	0.47776	0.213496	0.925485	-5.47955
OCCCCCn1ccc2ncnc(Nc3ccc(Oc4cccc(C(F)(F)F)c4)c(Cl)c3)c21	CHEMBL1923012	15	nM	7.82391	490.138	6	2	6.802	TRUE	490.913	6.802	6	2	3	0.252302	0	72.2	0.15986	0.671632	0.76998	0.793133	0.882377	0.166619	0.733081	0.22376	0.551526	0.771113	0.901964	0.372057	0.142857	0.787062	0.9998	0.0106121	0.015075	0.402951	0.734003	0.0258725	0.144675	0.127139	0.836461	0.991902	0.70664	0.0144316	0.22774	0.911766	0.330814	0.117944	0.967223	-5.11906
COc1cc2ncnc(Nc3ccc(F)c(Cl)c3)c2cc1OCCCCC(=O)NO	CHEMBL596736	15	nM	7.82391	434.116	7	3	4.229	TRUE	434.855	4.229	7	3	4	0.262699	0	105.6	0.818062	0.77503	0.933485	0.485508	0.67762	0.220444	0.472478	0.185126	0.229254	0.814253	0.94481	0.193491	0.619692	0.959283	0.999538	0.00975174	0.0101158	0.821469	0.328902	0.0564631	0.0913681	0.0604145	0.928025	0.771686	0.768428	0.154777	0.058636	0.312245	0.559057	0.206919	0.868347	-5.22022
CC(C)C(=O)N(C)C1CN[C@H](C(=O)N2CC=C(c3ccccc3)CC2)[C@@H](C(=O)NO)C1	CHEMBL569853	15.5	nM	7.80967	428.242	5	3	1.2688	TRUE	428.533	1.2688	5	3	4	0.484282	3	101.98	0.532029	0.549994	0.654589	0.00653346	0.137408	0.134805	0.0184099	0.0951597	0.0438898	0.795588	0.485718	0.103009	0.505916	0.379839	0.971415	0.00624116	0.0189762	0.037218	0.0143269	0.0111601	0.0702546	0.0047592	0.860712	0.136554	0.249999	0.0126434	0.0121179	0.00502917	0.02814	0.41294	0.366989	-5.61914
C#Cc1cccc(Nc2cccc3cc(OC)c(OCCCCCCC(=O)NO)cc23)c1	CHEMBL4637274	15.7	nM	7.8041	432.205	5	3	5.408	TRUE	432.52	5.408	5	3	3	0.163434	0	79.82	0.946353	0.667978	0.828627	0.54939	0.725304	0.254635	0.637162	0.338378	0.61661	0.858123	0.944386	0.38427	0.566141	0.876224	0.996767	0.0284423	0.0895763	0.83533	0.234499	0.0677691	0.250313	0.0471698	0.779223	0.942978	0.874954	0.258328	0.10036	0.594366	0.627942	0.387137	0.921298	-5.15206
C#Cc1cccc(Nc2ncnc3cc(OC)c(OCCCCCCC(=O)NO)cc23)c1	CHEMBL598797	15.7	nM	7.8041	434.195	7	3	4.198	TRUE	434.496	4.198	7	3	4	0.179745	0	105.6	0.945092	0.596048	0.881269	0.397996	0.647658	0.261824	0.538584	0.205469	0.49547	0.781441	0.966532	0.27194	0.691045	0.903854	0.998332	0.0200475	0.0593723	0.799946	0.279713	0.123733	0.207491	0.045716	0.851543	0.869608	0.857349	0.349613	0.0702382	0.489864	0.646031	0.272437	0.902776	-5.19461
Clc1cc(Nc2ncnc3cc[nH]c23)ccc1Oc1ccccc1	CHEMBL1922897	16	nM	7.79588	336.078	4	2	5.1472	TRUE	336.782	5.1472	4	2	3	0.540855	0	62.83	0.596268	0.750753	0.890194	0.993302	0.961457	0.281073	0.650183	0.264958	0.597744	0.564985	0.821928	0.18145	0.0735187	0.975968	0.999978	0.0140859	0.0227064	0.958409	0.723156	0.163196	0.46954	0.15606	0.940498	0.61595	0.854388	0.416525	0.466232	0.848552	0.487068	0.369615	0.767373	-5.04291
O[C@H]1CNCCN(Cc2ccn3ncnc(Nc4ccc5c(cnn5Cc5cccc(F)c5)c4)c23)C1	CHEMBL233325	16	nM	7.79588	486.229	9	3	2.7761	TRUE	486.555	2.7761	9	3	4	0.339747	1	95.54	0.252921	0.51252	0.733	0.155436	0.325858	0.20205	0.213587	0.439895	0.618551	0.531874	0.931909	0.349621	0.776744	0.836967	0.997879	0.0149184	0.0251153	0.298746	0.0912123	0.00445343	0.0368919	0.00392527	0.631137	0.788038	0.254096	0.0104284	0.012197	0.141544	0.0486038	0.158613	0.984663	-5.89001
C=CC(=O)Nc1cc2c(Nc3cccc(Cl)c3F)ncnc2cc1OCc1cn(CCCCC(=O)NO)nn1	CHEMBL4783641	16	nM	7.79588	554.159	10	4	4.1366	TRUE	554.97	4.1366	10	4	3	0.0874117	0	156.18	0.891697	0.544068	0.84064	0.0922035	0.476429	0.12278	0.421576	0.0522854	0.274228	0.78731	0.933267	0.367663	0.681133	0.94947	0.99415	0.0104073	0.0082111	0.215391	0.151331	0.04675	0.0871578	0.0841891	0.64623	0.901925	0.711238	0.125133	0.0463844	0.249222	0.475956	0.261972	0.839931	-5.66915
CN(C)c1cc2c(Nc3ccc4c(cnn4Cc4ccccc4)c3)ncnc2cn1	CHEMBL30432	16	nM	7.79588	395.186	7	1	4.2324	TRUE	395.47	4.2324	7	1	4	0.480093	0	71.76	0.578061	0.591459	0.860801	0.807648	0.616521	0.292235	0.262327	0.34542	0.359975	0.524116	0.775632	0.428109	0.399477	0.956515	0.998041	0.0689701	0.0449108	0.793588	0.491245	0.0550809	0.154588	0.10468	0.894843	0.756761	0.724591	0.240494	0.156968	0.665555	0.504577	0.248147	0.933049	-5.27842
O=C(C#CCO)Nc1ccc2ncnc(Nc3cccc(Br)c3)c2c1	CHEMBL94062	16	nM	7.79588	396.022	5	3	3.0701	TRUE	397.232	3.0701	5	3	4	0.591742	0	87.14	0.451749	0.689447	0.895564	0.930701	0.545256	0.448754	0.312781	0.187633	0.281082	0.490226	0.695489	0.282615	0.307256	0.980931	0.999825	0.0375932	0.0400527	0.902078	0.305299	0.017959	0.175787	0.10915	0.936674	0.466097	0.67956	0.123752	0.175179	0.818194	0.400786	0.380302	0.723442	-5.07965
CC(=O)Nc1ccc2ncnc(Nc3ccc(OCc4ccccn4)c(Cl)c3)c2c1	CHEMBL3633929	16	nM	7.79588	419.115	6	2	4.9592	TRUE	419.872	4.9592	6	2	4	0.458863	0	89.03	0.553678	0.416312	0.908787	0.611987	0.751365	0.305162	0.358788	0.149502	0.324603	0.741804	0.807196	0.336139	0.35955	0.967304	0.998252	0.0192818	0.0264573	0.754216	0.387636	0.0608135	0.201091	0.0913939	0.86176	0.641885	0.768231	0.151136	0.234174	0.502954	0.558648	0.178148	0.717339	-5.37502
NC(=O)O[C@H]1CN[C@H](C#Cc2cc3ncnc(Nc4ccc(OCc5cccc(F)c5)c(Cl)c4)c3s2)C1	CHEMBL461426	16	nM	7.79588	537.104	8	3	4.9837	TRUE	538.004	4.9837	8	3	3	0.297242	2	111.39	0.638547	0.633914	0.903305	0.397285	0.775817	0.348894	0.750732	0.128403	0.258589	0.668873	0.932466	0.187744	0.595001	0.954708	0.998614	0.0169195	0.0253403	0.322793	0.272586	0.0530912	0.181582	0.409244	0.670018	0.937683	0.858739	0.290542	0.284519	0.731125	0.668081	0.235711	0.811954	-5.37672
O=C(/C=C/CN1CCCC1)Nc1cc2c(Nc3ccc(Cc4ccccn4)cc3)ncnc2cn1	CHEMBL3967962	17	nM	7.76955	465.228	7	2	4.3447	TRUE	465.561	4.3447	7	2	4	0.373688	0	95.93	0.389486	0.647871	0.69772	0.154074	0.347209	0.207806	0.297319	0.224027	0.296981	0.654705	0.477795	0.278146	0.756352	0.893954	0.962481	0.0455154	0.029383	0.335745	0.0909751	0.0430829	0.124763	0.0342343	0.792838	0.704288	0.568909	0.168385	0.141367	0.267698	0.409807	0.261285	0.872978	-5.60606
COc1cc(Nc2ncnc3[nH]nc(OCCN4CCC(O)CC4)c23)ccc1OCc1ccccn1	CHEMBL401713	17	nM	7.76955	491.228	10	3	2.9146	TRUE	491.552	2.9146	10	3	4	0.304296	0	130.54	0.112838	0.416117	0.739338	0.0884676	0.127421	0.0782922	0.0871714	0.326646	0.2213	0.658499	0.270663	0.100557	0.640636	0.72167	0.984984	0.00866346	0.0157134	0.471743	0.0179292	0.00736901	0.0763902	0.00283469	0.589407	0.339017	0.206589	0.0230458	0.0185393	0.101681	0.185841	0.120968	0.889613	-5.6128
COc1ccccc1Cc1nc2ccc(-c3nn([C@H]4CC[C@H](N5CCN(C(=O)N(C)C)CC5)CC4)c4ncnc(N)c34)cc2[nH]1	CHEMBL448628	17	nM	7.76955	608.334	9	2	4.3341	TRUE	608.751	4.3341	9	2	3	0.29096	0	134.32	0.307261	0.744781	0.74019	0.100443	0.688074	0.355811	0.613299	0.344346	0.375255	0.80775	0.914522	0.116696	0.720349	0.884424	0.99773	0.00318933	0.00951414	0.372753	0.24601	0.0189184	0.0484394	0.014063	0.822462	0.78651	0.612138	0.0699312	0.0235333	0.551144	0.225558	0.207183	0.981828	-5.47266
Cn1ccc2ncnc(Nc3ccc(Oc4cccc(OC(F)(F)F)c4)c(Cl)c3)c21	CHEMBL1923005	17	nM	7.76955	434.076	6	1	6.0562	TRUE	434.805	6.0562	6	1	3	0.413663	0	61.2	0.365527	0.742533	0.91983	0.941839	0.89385	0.328855	0.59645	0.178215	0.444806	0.630608	0.746926	0.357014	0.137999	0.942577	0.999757	0.0131937	0.0252389	0.789703	0.497996	0.0495437	0.243167	0.203202	0.879596	0.934125	0.80378	0.112059	0.31447	0.769671	0.346944	0.165914	0.80481	-4.86029
CO/N=C/c1c(N)ncnc1Nc1ccc(OCc2cccc(F)c2)c(Cl)c1	CHEMBL256297	18	nM	7.74473	401.105	7	2	4.1542	TRUE	401.829	4.1542	7	2	4	0.4558	0	94.65	0.469906	0.692981	0.903896	0.749616	0.955706	0.265093	0.60602	0.156917	0.395546	0.654892	0.95148	0.326769	0.134662	0.903056	0.999501	0.00548229	0.0237189	0.842843	0.429804	0.0411002	0.145453	0.0908902	0.83889	0.711732	0.591103	0.187926	0.262328	0.365453	0.155794	0.221933	0.758313	-5.04154
Cc1cc(Nc2ncnc3cnc(N4CCOCC4)cc23)ccc1OC1CCN(C(=O)C2CCCC2)CC1	CHEMBL228276	18	nM	7.74473	516.285	8	1	4.47342	TRUE	516.646	4.47342	8	1	3	0.513007	0	92.71	0.17011	0.649463	0.83033	0.0386686	0.358753	0.191995	0.30442	0.221445	0.0385082	0.83963	0.626859	0.150306	0.396039	0.878968	0.998111	0.0123894	0.0203407	0.358507	0.155413	0.0479445	0.16476	0.0387927	0.912886	0.708052	0.750298	0.323904	0.250908	0.554849	0.397043	0.0953981	0.755297	-4.96916
O=C(NO)[C@H]1CC2(CC2)CN[C@@H]1C(=O)N1CC=C(c2ccccc2)CC1	CHEMBL373532	18	nM	7.74473	355.19	4	3	1.566	TRUE	355.438	1.566	4	3	4	0.567786	2	81.67	0.759788	0.857979	0.827983	0.0902062	0.334496	0.122891	0.0550695	0.191954	0.135034	0.733217	0.41954	0.0668781	0.688832	0.297685	0.998439	0.024544	0.0312858	0.105441	0.0828182	0.0358721	0.170676	0.0194008	0.793045	0.0654719	0.393107	0.128959	0.0482313	0.0375614	0.182562	0.53205	0.406018	-5.61013
O=C1NCc2cc(Oc3ccc(Nc4ncnc5ccn(CCO)c45)cc3Cl)ccc21	CHEMBL2048790	18	nM	7.74473	435.11	7	3	3.8563	TRUE	435.871	3.8563	7	3	4	0.424901	0	101.3	0.388862	0.328878	0.8382	0.526866	0.621373	0.332374	0.57246	0.1127	0.219468	0.57261	0.702342	0.22891	0.325969	0.975642	0.999091	0.0161089	0.0235113	0.56515	0.384105	0.0179796	0.145086	0.0777681	0.795786	0.841591	0.553867	0.0655788	0.144746	0.671824	0.395182	0.218015	0.845439	-5.40693
C=CC(=O)N1CCC[C@H]1C(=O)Nc1cc2c(Nc3ccc(F)c(Cl)c3F)ncnc2cc1OCCOC	CHEMBL569880	18	nM	7.74473	531.148	7	2	4.4457	TRUE	531.947	4.4457	7	2	3	0.238679	1	105.68	0.313315	0.646026	0.784523	0.0651443	0.405332	0.148668	0.461341	0.0805434	0.0669567	0.8052	0.868679	0.151911	0.393963	0.975439	0.997015	0.0159596	0.0160213	0.417476	0.239997	0.0230884	0.055245	0.0759848	0.851106	0.892859	0.773472	0.113862	0.0964279	0.274249	0.436305	0.13929	0.860862	-4.8564
O=C(O)COCc1ccn2ncnc(Nc3ccc4c(cnn4Cc4cccc(F)c4)c3)c12	CHEMBL394057	18	nM	7.74473	446.15	8	2	3.6112	TRUE	446.442	3.6112	8	2	4	0.37499	0	106.57	0.0980167	0.691803	0.915346	0.265958	0.333415	0.365294	0.422864	0.0507614	0.139466	0.273456	0.633263	0.222266	0.531004	0.982736	0.976768	0.0116982	0.0380444	0.179777	0.178025	0.0153434	0.0671821	0.223113	0.41125	0.247783	0.413204	0.0353571	0.0186706	0.0593443	0.0943019	0.0904801	0.544908	-5.7781
NC1CCN(Cc2ccn3ncnc(Nc4ccc(OCc5cccc[n+]5[O-])c(Cl)c4)c23)CC1	CHEMBL248322	18	nM	7.74473	479.184	8	2	3.2618	TRUE	479.972	3.2618	8	2	4	0.309156	0	107.65	0.257413	0.804761	0.783586	0.170008	0.271311	0.051596	0.133999	0.382963	0.848856	0.746565	0.579185	0.217944	0.793558	0.608195	0.994442	0.0343325	0.0287179	0.325554	0.203779	0.0424557	0.118433	0.00859381	0.753265	0.635331	0.420088	0.0449534	0.041331	0.125611	0.135087	0.208356	0.929753	-5.98876
COC(=O)C1=Cc2c(ncnc2Nc2ccc(Oc3cccc4sccc34)c(Cl)c2)NCC1	CHEMBL2348416	18	nM	7.74473	478.087	8	2	6.2526	TRUE	478.961	6.2526	8	2	3	0.327582	0	85.37	0.446032	0.590225	0.773133	0.852801	0.91162	0.226601	0.745292	0.156811	0.6202	0.645475	0.922799	0.155217	0.291689	0.972075	0.999015	0.0135786	0.0194133	0.806604	0.285942	0.0440662	0.157892	0.131591	0.870277	0.899061	0.718439	0.153364	0.400195	0.68145	0.628591	0.288236	0.842143	-5.06458
O=C(NO)[C@H]1C[C@@H](CC(=O)N2CCCCC2)CC[C@@H]1C(=O)N1CCN(c2ccccc2)CC1	CHEMBL496628	18	nM	7.74473	456.274	5	2	2.2757	TRUE	456.587	2.2757	5	2	4	0.523828	3	93.19	0.186913	0.906177	0.445509	0.00945201	0.373033	0.236609	0.134412	0.343594	0.0792666	0.890181	0.671711	0.0508511	0.427039	0.387095	0.995041	0.0101406	0.0351787	0.0333021	0.0206062	0.0168899	0.0998649	0.0111998	0.893869	0.301069	0.5352	0.0627751	0.0401456	0.0705066	0.131525	0.242242	0.66897	-5.23369
Nc1ncnc(Nc2ccc3c(cnn3Cc3cccc(F)c3)c2)c1/C=N/N1CCCCC1	CHEMBL524457	18	nM	7.74473	444.219	8	2	4.1593	TRUE	444.518	4.1593	8	2	4	0.433614	0	97.25	0.507335	0.801271	0.907044	0.303451	0.839428	0.184669	0.670713	0.21613	0.202177	0.709358	0.901998	0.324123	0.668127	0.910594	0.99974	0.00455113	0.0173639	0.70217	0.557561	0.0305329	0.10126	0.0264562	0.932239	0.794838	0.696979	0.152455	0.0611234	0.392361	0.107907	0.222217	0.957134	-5.51947
CCC1=C2C(Nc3ccc4c(cnn4Cc4ccccc4)c3)=NC=NC2N=C1NC(=O)OCCN1CCNCC1	CHEMBL565714	18	nM	7.74473	539.276	10	3	3.0131	TRUE	539.644	3.0131	10	3	3	0.424639	1	120.53	0.209131	0.809737	0.753149	0.244226	0.747299	0.430139	0.720996	0.422135	0.452976	0.625183	0.891285	0.169773	0.717426	0.903656	0.99747	0.00613432	0.0132517	0.249275	0.0691778	0.0114038	0.0536313	0.0451045	0.728267	0.916025	0.632281	0.0544252	0.0318961	0.350001	0.2892	0.250699	0.961129	-5.90456
CCC1=C2C(Nc3ccc4c(cnn4Cc4ccccc4)c3)=NC=NC2N=C1NC(=O)O[C@H]1CC[C@H](N)CC1	CHEMBL565467	18	nM	7.74473	524.265	9	3	4.3778	TRUE	524.629	4.3778	9	3	3	0.455911	1	131.28	0.565524	0.859032	0.913346	0.351552	0.698653	0.352969	0.769387	0.228138	0.413016	0.648011	0.890986	0.160667	0.647545	0.848253	0.999461	0.0149441	0.0170407	0.237574	0.340047	0.034785	0.139246	0.191203	0.756917	0.917039	0.747204	0.455499	0.122136	0.837948	0.595834	0.195098	0.896746	-6.00884
OC1CCN(CCOc2n[nH]c3ncnc(Nc4ccc(OCc5cccc(F)c5)c(Cl)c4)c23)CC1	CHEMBL255376	19	nM	7.72125	512.174	8	3	4.3035	TRUE	512.973	4.3035	8	3	3	0.304411	0	108.42	0.127094	0.584179	0.774085	0.403427	0.544963	0.164301	0.435997	0.446184	0.609178	0.76608	0.783425	0.218054	0.723401	0.866027	0.997706	0.0114953	0.0151651	0.596833	0.122196	0.0141831	0.0869259	0.0237519	0.715031	0.871008	0.497368	0.0458688	0.0704617	0.383067	0.246441	0.150239	0.949272	-5.46879
COc1cc2ncnc(Nc3ccc(F)c(Cl)c3)c2cc1OCCCCCCC(=O)NO	CHEMBL598377	19	nM	7.72125	462.147	7	3	5.0092	TRUE	462.909	5.0092	7	3	3	0.208783	0	105.6	0.796491	0.740743	0.914543	0.385377	0.791179	0.254019	0.707409	0.208454	0.286873	0.852287	0.954727	0.231684	0.629588	0.939741	0.99935	0.00723754	0.0124529	0.79779	0.342171	0.0467987	0.100743	0.0688749	0.904221	0.936069	0.801173	0.152639	0.0826342	0.482574	0.576191	0.211623	0.91778	-5.27975
COCCOc1cc2ncnc(Nc3ccc4c(cnn4Cc4ccccc4)c3)c2cc1NC(=O)/C=C/CN1CCN(C)CC1	CHEMBL3970330	19	nM	7.72125	606.307	10	2	4.5387	TRUE	606.731	4.5387	10	2	3	0.156311	0	109.67	0.485758	0.579411	0.673705	0.0722484	0.408717	0.31356	0.276732	0.289074	0.150058	0.829713	0.784379	0.360407	0.782164	0.961455	0.977027	0.00755579	0.0119522	0.359952	0.0821798	0.022061	0.0326602	0.0256106	0.777174	0.908272	0.782479	0.0587796	0.0554801	0.302285	0.415553	0.234243	0.977253	-5.19168
C[C@@H](Oc1cccc2ncnc(Nc3ccc(OCc4ccccn4)c(Cl)c3)c12)C(=O)N1CCOCC1	CHEMBL403774	19	nM	7.72125	519.167	8	1	4.6269	TRUE	519.989	4.6269	8	1	3	0.359672	1	98.7	0.253602	0.43953	0.915206	0.130166	0.689159	0.310189	0.557017	0.0964097	0.0690072	0.737086	0.89706	0.261752	0.509423	0.978407	0.998503	0.00444893	0.0111543	0.439947	0.312546	0.0165198	0.0776867	0.117314	0.909825	0.844897	0.796182	0.032196	0.0721686	0.367905	0.157257	0.146688	0.83465	-4.99162
C=CC(=O)Nc1cc2c(Nc3ccc(F)c(Cl)c3)ncnc2cc1C#CC(C)(C)N1CCN(C)CC1	CHEMBL2138625	19	nM	7.72125	506.2	6	2	4.6679	TRUE	507.013	4.6679	6	2	3	0.386893	0	73.39	0.338523	0.696289	0.652218	0.129225	0.611612	0.288322	0.395726	0.215544	0.422254	0.838284	0.882782	0.479898	0.775087	0.918137	0.98771	0.0179018	0.0165464	0.271084	0.280063	0.0820626	0.07449	0.0737567	0.901635	0.856833	0.723137	0.0680824	0.172193	0.329231	0.26485	0.315618	0.89132	-4.81266
O=C(O)CNCc1ccc(-c2cc3c(Nc4ccc(OCc5ccccc5)cc4)ncnc3cn2)o1	CHEMBL477078	19	nM	7.72125	481.175	8	3	4.7816	TRUE	481.512	4.7816	8	3	4	0.258516	0	122.4	0.230328	0.288129	0.892919	0.438889	0.440021	0.331882	0.349325	0.0471871	0.258578	0.276856	0.53058	0.30003	0.415272	0.966077	0.907062	0.0132132	0.0573624	0.534667	0.306544	0.0507821	0.170038	0.499042	0.496988	0.549292	0.77728	0.105741	0.165842	0.35597	0.236172	0.215508	0.753678	-5.95281
C[C@@H](COc1cccc2ncnc(Nc3ccc(OCc4ccccn4)c(Cl)c3)c12)N(C)C(=O)CO	CHEMBL403785	19	nM	7.72125	507.167	8	2	4.2188	TRUE	507.978	4.2188	8	2	3	0.328167	1	109.7	0.245895	0.186544	0.855052	0.229788	0.579347	0.346694	0.314451	0.111425	0.244342	0.790043	0.904635	0.275384	0.389832	0.947491	0.997341	0.008809	0.0178595	0.643446	0.233537	0.0119774	0.0593682	0.0438792	0.877739	0.78085	0.507913	0.0177926	0.0601784	0.319265	0.194998	0.0818088	0.828622	-5.14164
CS(=O)(=O)CCNCCCCOc1ccc2ncnc(Nc3ccc4c(cnn4Cc4cccc(F)c4)c3)c2c1	CHEMBL493428	19	nM	7.72125	562.216	9	2	4.7037	TRUE	562.671	4.7037	9	2	3	0.198735	0	111.03	0.424606	0.582123	0.805339	0.424033	0.753613	0.439793	0.497752	0.441202	0.535098	0.831757	0.985015	0.601694	0.531477	0.928781	0.995681	0.00716945	0.0136454	0.27931	0.210538	0.0179592	0.0456054	0.0597144	0.4545	0.913332	0.615002	0.0333274	0.0871143	0.37232	0.23898	0.0991836	0.980881	-5.35003
O=C(O[C@H]1CN[C@H](C#Cc2cc3ncnc(Nc4ccc(OCc5cccc(F)c5)c(Cl)c4)c3s2)C1)N1CCNCC1	CHEMBL499534	20	nM	7.69897	606.162	9	3	4.9302	TRUE	607.111	4.9302	9	3	3	0.265801	2	100.64	0.357993	0.463338	0.666397	0.220622	0.852049	0.389334	0.778405	0.198843	0.325924	0.780692	0.970533	0.198886	0.481142	0.966448	0.996558	0.00835756	0.017462	0.302584	0.172754	0.0340907	0.15099	0.226424	0.683271	0.954118	0.876661	0.0872834	0.214619	0.656549	0.49458	0.278576	0.90219	-5.38122
CCC1=C2C(Nc3ccc4c(cnn4Cc4ccccc4)c3)=NC=NC2N=C1NC(=O)O[C@H]1CC[C@@](C)(N)CC1	CHEMBL567197	20	nM	7.69897	538.28	9	3	4.7679	TRUE	538.656	4.7679	9	3	3	0.430734	1	131.28	0.539236	0.896976	0.926388	0.239702	0.552939	0.351257	0.622975	0.298068	0.452302	0.700712	0.867545	0.206744	0.748287	0.799705	0.999173	0.0110009	0.0121768	0.199497	0.279759	0.0271495	0.0989751	0.117226	0.77792	0.925854	0.655911	0.336636	0.0867759	0.780702	0.472086	0.175962	0.914599	-5.98833
Fc1cccc(Oc2ccc(Nc3ncnc4cc[nH]c34)cc2Cl)c1	CHEMBL1922899	20	nM	7.69897	354.068	4	2	5.2863	TRUE	354.772	5.2863	4	2	3	0.522627	0	62.83	0.507734	0.747357	0.936407	0.989412	0.954478	0.335698	0.693814	0.29461	0.542021	0.602075	0.928357	0.188007	0.102157	0.980169	0.999983	0.0132645	0.029246	0.963048	0.643429	0.0877079	0.370956	0.11642	0.923006	0.65205	0.820876	0.402953	0.269895	0.830847	0.447243	0.213189	0.808303	-5.00291
C#Cc1cccc(Nc2ncnn3ccc(COC[C@@H]4CNCCO4)c23)c1	CHEMBL1645465	20	nM	7.69897	363.17	7	2	1.9592	TRUE	363.421	1.9592	7	2	4	0.652548	1	72.71	0.808253	0.722762	0.943251	0.465106	0.115544	0.195682	0.0553104	0.236139	0.120282	0.439887	0.939663	0.161685	0.570394	0.897556	0.999515	0.0361245	0.0477264	0.421911	0.348703	0.119153	0.255752	0.0329142	0.791645	0.127771	0.36154	0.13934	0.0278916	0.0861832	0.244856	0.334249	0.744936	-5.06316
Nc1ncnc(Nc2ccc3c(cnn3Cc3cccc(F)c3)c2)c1/C=N/NCC(F)(F)F	CHEMBL497863	20	nM	7.69897	458.159	8	3	3.8253	TRUE	458.423	3.8253	8	3	4	0.220894	0	106.04	0.5682	0.724854	0.878834	0.671328	0.859009	0.297217	0.600674	0.21762	0.419399	0.525789	0.969617	0.504235	0.611258	0.945682	0.998925	0.0114282	0.021009	0.636369	0.520731	0.0253857	0.0769129	0.0820666	0.755701	0.577505	0.547801	0.106657	0.0483897	0.653805	0.181364	0.144139	0.952431	-5.36429
Cc1ccccc1Nc1ncnn2ccc(CN3CCC(N)CC3)c12	CHEMBL1645469	20	nM	7.69897	336.206	6	2	2.70442	TRUE	336.443	2.70442	6	2	4	0.766371	0	71.48	0.266161	0.993004	0.925507	0.0912796	0.0596152	0.0904746	0.0117663	0.605399	0.741592	0.584775	0.0939236	0.114846	0.81498	0.239747	0.999859	0.00496091	0.0241936	0.195809	0.046151	0.00515231	0.0612043	0.000339572	0.859827	0.297079	0.0653448	0.00320314	0.00391727	0.0053021	0.00453007	0.311423	0.967042	-5.66004
COc1cc2ncnc(Nc3ccc(F)c(Cl)c3)c2cc1OCCCCCC(=O)NO	CHEMBL598163	20	nM	7.69897	448.131	7	3	4.6191	TRUE	448.882	4.6191	7	3	4	0.235892	0	105.6	0.819725	0.760539	0.927288	0.422815	0.729192	0.228173	0.577302	0.198015	0.267026	0.838717	0.95121	0.214494	0.636389	0.946928	0.999442	0.00859975	0.0110349	0.806131	0.339847	0.0522473	0.0992362	0.0646232	0.917065	0.871285	0.786767	0.156084	0.0687286	0.396285	0.573757	0.201873	0.895406	-5.23385
COc1cc2ncnc(Nc3ccc(F)c(Cl)c3)c2cc1NC(=O)CCCCCCC(=O)NO	CHEMBL597773	20.1	nM	7.6968	489.158	7	4	4.959	TRUE	489.935	4.959	7	4	4	0.170262	0	125.47	0.797121	0.57627	0.852439	0.230242	0.695474	0.195057	0.619133	0.130689	0.219174	0.838115	0.901915	0.274211	0.65062	0.937852	0.995528	0.0102504	0.0144563	0.64651	0.239155	0.058436	0.0858698	0.0555901	0.793519	0.824489	0.616968	0.149229	0.0839129	0.389555	0.644471	0.245906	0.899456	-5.36065
Cc1ccccc1NC(=O)CSc1nc2cc3ccccc3cc2c(=O)n1-c1ccc(S(N)(=O)=O)cc1	CHEMBL5280584	21	nM	7.67778	530.108	7	2	4.22552	TRUE	530.631	4.22552	7	2	3	0.192399	0	124.15	0.122435	0.604014	0.827519	0.287089	0.48536	0.746689	0.675238	0.150551	0.0882563	0.539465	0.775218	0.582402	0.243769	0.979565	0.978384	0.0663568	0.110119	0.0609704	0.100642	0.0178763	0.0919225	0.172434	0.593175	0.823492	0.323923	0.0372306	0.0290497	0.356843	0.0647594	0.147732	0.79024	-5.82117
C=CC(=O)Nc1cccc(-c2c(-c3ccc(N4CCN(C)CC4)cc3)[nH]c3ncnc(OC(C)C)c23)c1	CHEMBL4799276	21	nM	7.67778	496.259	6	2	4.9554	TRUE	496.615	4.9554	6	2	4	0.35206	0	86.38	0.255466	0.451442	0.698595	0.305535	0.490634	0.379177	0.35511	0.3516	0.139097	0.794848	0.585824	0.261475	0.555262	0.957317	0.979064	0.0232341	0.0207508	0.46471	0.196552	0.0459362	0.0767171	0.0486551	0.748041	0.832974	0.669773	0.163749	0.203263	0.490108	0.56511	0.236247	0.894029	-4.96537
CCC1=C2C(Nc3ccc4c(cnn4Cc4ccccc4)c3)=NC=NC2N=C1NC(=O)OC[C@@H]1COCCN1	CHEMBL567873	21	nM	7.67778	526.244	10	3	3.0963	TRUE	526.601	3.0963	10	3	3	0.453196	2	126.52	0.364383	0.73047	0.853479	0.231065	0.822343	0.329687	0.889877	0.178211	0.202896	0.603945	0.922246	0.12809	0.555169	0.955504	0.999173	0.00485514	0.0112595	0.400096	0.235732	0.0197412	0.0850161	0.172382	0.789519	0.90852	0.804402	0.203995	0.0835119	0.701321	0.506255	0.199161	0.92112	-5.70126
O=C(CBr)OCCn1c(=O)oc2cc3ncnc(Nc4ccc(N5CCOCC5)c(Cl)c4)c3cc21	CHEMBL3965948	21	nM	7.67778	561.041	10	1	3.7094	TRUE	562.808	3.7094	10	1	3	0.266073	0	111.72	0.296362	0.760452	0.677228	0.552989	0.766387	0.0887944	0.559228	0.0754272	0.133354	0.359831	0.84309	0.108052	0.439419	0.982029	0.997531	0.0340282	0.0243282	0.361042	0.389413	0.0442331	0.0976405	0.345588	0.831867	0.728841	0.81655	0.258662	0.265488	0.488744	0.467342	0.330407	0.793895	-4.92876
Cc1ccc(NC(=O)CSc2nc3cc4ccccc4cc3c(=O)n2-c2ccc(S(N)(=O)=O)cc2)cc1	CHEMBL5277831	21	nM	7.67778	530.108	7	2	4.22552	TRUE	530.631	4.22552	7	2	3	0.192399	0	124.15	0.112384	0.476439	0.819913	0.28086	0.459294	0.703653	0.67384	0.130771	0.0822989	0.496238	0.734737	0.612952	0.249364	0.98265	0.970575	0.0620055	0.102003	0.0622827	0.0970697	0.0199241	0.109075	0.163597	0.51094	0.817818	0.337394	0.051966	0.0295148	0.40467	0.0751164	0.150677	0.766624	-5.74412
C[C@@H](Oc1cccc2ncnc(Nc3ccc4c(cnn4Cc4cccc(F)c4)c3)c12)C(=O)N1CCOCC1	CHEMBL439425	22	nM	7.65758	526.213	8	1	4.5366	TRUE	526.572	4.5366	8	1	3	0.332868	1	94.4	0.302965	0.56409	0.914975	0.0907583	0.690735	0.384392	0.696388	0.106416	0.0731672	0.734423	0.946963	0.359382	0.538897	0.98502	0.999389	0.00307789	0.0125887	0.33291	0.272009	0.00817085	0.0602367	0.0636144	0.874835	0.91515	0.821805	0.0288181	0.031721	0.541009	0.128224	0.118427	0.94832	-4.91774
C=CC(=O)Nc1ccc2ncnc(Nc3cccc(C)c3)c2c1	CHEMBL31815	22	nM	7.65758	304.132	4	2	3.80632	TRUE	304.353	3.80632	4	2	4	0.71933	0	66.91	0.780047	0.879338	0.930054	0.956372	0.71542	0.363848	0.149805	0.317061	0.484389	0.70393	0.871469	0.171764	0.211571	0.962101	0.999895	0.108675	0.107518	0.942213	0.422539	0.125821	0.5359	0.0813716	0.956879	0.444022	0.846888	0.629489	0.301286	0.829015	0.766358	0.378483	0.661212	-4.96953
NC1CCN(Cc2ccn3ncnc(Nc4ccc(OCc5ccccn5)c(Cl)c4)c23)CC1	CHEMBL248116	22	nM	7.65758	463.189	8	2	4.0234	TRUE	463.973	4.0234	8	2	4	0.427105	0	93.6	0.312326	0.86459	0.883593	0.351281	0.381165	0.0760257	0.180234	0.455245	0.777982	0.725909	0.640783	0.230763	0.854551	0.614247	0.999014	0.012402	0.0178739	0.404081	0.262847	0.0323033	0.104475	0.00795342	0.838793	0.72315	0.42389	0.029993	0.0613776	0.102537	0.0781582	0.248523	0.947371	-5.84314
CO/N=C/c1c(N)ncnc1Nc1ccc2c(cnn2Cc2ccccc2)c1	CHEMBL402113	22	nM	7.65758	373.165	8	2	3.1807	TRUE	373.42	3.1807	8	2	4	0.397376	0	103.24	0.49744	0.789183	0.845441	0.479106	0.71555	0.211469	0.302326	0.197703	0.233077	0.506334	0.842197	0.312232	0.227563	0.920429	0.998322	0.0109304	0.037064	0.713316	0.361706	0.0393657	0.177013	0.026828	0.777679	0.578469	0.523387	0.131329	0.0864184	0.260655	0.122811	0.303843	0.847459	-5.38129
C[C@@H](CN(C)C(=O)CO)Oc1cccc2ncnc(Nc3ccc(OCc4ccccn4)c(Cl)c3)c12	CHEMBL413987	22	nM	7.65758	507.167	8	2	4.2188	TRUE	507.978	4.2188	8	2	3	0.328167	1	109.7	0.287312	0.211779	0.852117	0.311461	0.64377	0.31897	0.328319	0.125193	0.402982	0.789929	0.939858	0.285137	0.44746	0.933187	0.99783	0.00840411	0.0153459	0.6215	0.234225	0.0122087	0.0578519	0.038291	0.883367	0.785534	0.518336	0.0148687	0.0611712	0.296601	0.171778	0.0885601	0.851289	-5.13594
Clc1cc(Nc2ncnc3cc[nH]c23)ccc1OCc1ccccn1	CHEMBL1923001	22	nM	7.65758	351.089	5	2	4.3289	TRUE	351.797	4.3289	5	2	4	0.559412	0	75.72	0.571207	0.488184	0.906568	0.976241	0.886409	0.242689	0.381739	0.255357	0.458628	0.547517	0.916943	0.159639	0.156312	0.9677	0.999887	0.0202257	0.021343	0.927942	0.612005	0.134598	0.317103	0.109948	0.886451	0.363194	0.796559	0.381158	0.326121	0.644372	0.53388	0.29618	0.683094	-5.36568
Cc1ccc(Oc2ccc(Nc3ncnc4cccc(O[C@H](C)C(=O)N5CCOCC5)c34)cc2C)cn1	CHEMBL402507	22	nM	7.65758	499.222	8	1	4.80364	TRUE	499.571	4.80364	8	1	4	0.387091	1	98.7	0.313543	0.427918	0.929256	0.0408742	0.483919	0.386717	0.476663	0.117351	0.0481975	0.808812	0.913745	0.297018	0.631051	0.970472	0.998213	0.00573546	0.017609	0.383589	0.22739	0.0160701	0.0863391	0.0711018	0.9109	0.893515	0.748539	0.0512861	0.0624976	0.503811	0.182228	0.108962	0.886763	-4.82021
CCC1=C2C(Nc3ccc4c(cnn4Cc4cccc(F)c4)c3)=NC=NC2N=C1NC(=O)OC[C@@H]1COCCN1	CHEMBL583403	22	nM	7.65758	544.235	10	3	3.2354	TRUE	544.591	3.2354	10	3	3	0.43752	2	126.52	0.397053	0.71822	0.894469	0.198359	0.825087	0.328979	0.879669	0.1724	0.224951	0.681309	0.967096	0.176253	0.631099	0.960307	0.999493	0.00408035	0.0103791	0.361358	0.227307	0.0117014	0.0663244	0.156728	0.796259	0.922117	0.795116	0.196703	0.0495774	0.666642	0.404492	0.141179	0.937301	-5.60896
Cc1c(NC(=O)OC[C@@H]2COCCN2)cn2ncnc(Nc3ccc4c(cnn4Cc4cccc(F)c4)c3)c12	CHEMBL1645462	22	nM	7.65758	530.219	10	3	3.85532	TRUE	530.564	3.85532	10	3	3	0.290337	1	119.63	0.432671	0.582549	0.876419	0.0835509	0.430497	0.186777	0.499696	0.109428	0.154475	0.648807	0.966834	0.243875	0.797222	0.974255	0.998342	0.00844456	0.0206172	0.270447	0.187342	0.0130887	0.0722084	0.084894	0.735475	0.871479	0.716102	0.0906266	0.0320358	0.529979	0.353408	0.111917	0.941745	-5.28455
CN(C)C/C=C/C(=O)Nc1cc2c(Nc3ccc(F)c(Cl)c3)ncnc2cc1OC[C@@]12COC[C@@H]1C2	CHEMBL3901296	22	nM	7.65758	511.179	7	2	4.6375	TRUE	511.985	4.6375	7	2	3	0.404565	2	88.61	0.65183	0.75875	0.88395	0.206734	0.128234	0.169089	0.0717544	0.232098	0.235748	0.749381	0.875904	0.245736	0.773178	0.923362	0.994882	0.0633354	0.0258012	0.338594	0.320947	0.0714235	0.102743	0.106957	0.814696	0.715482	0.691754	0.391427	0.181167	0.482097	0.636479	0.160392	0.83274	-5.05528
C=CC(=O)NCc1coc(-c2c(N)ncnc2Nc2ccc(OCc3ccccn3)c(Cl)c2)n1	CHEMBL2035810	22.4	nM	7.64975	477.132	9	3	3.887	TRUE	477.912	3.887	9	3	4	0.30588	0	141.08	0.51162	0.529229	0.856252	0.26362	0.827985	0.212664	0.431792	0.0803485	0.369088	0.714106	0.950464	0.252468	0.458641	0.941813	0.99474	0.00903956	0.0143332	0.442541	0.267769	0.0411753	0.104183	0.0928616	0.797797	0.499319	0.697116	0.0499576	0.140542	0.159955	0.237672	0.253607	0.7444	-5.48096
CCOc1cc2ncnc(Nc3ccc4c(cnn4Cc4ccccc4)c3)c2cc1NC(=O)/C=C/CN1CCN(C)CC1	CHEMBL3921129	23	nM	7.63827	576.296	9	2	4.9122	TRUE	576.705	4.9122	9	2	3	0.226341	0	100.44	0.342642	0.571235	0.696696	0.161914	0.521545	0.406517	0.348391	0.319662	0.26014	0.767552	0.811381	0.427784	0.729162	0.96688	0.981056	0.012084	0.0140347	0.330796	0.0903595	0.0196223	0.0424154	0.0324424	0.757887	0.888348	0.750939	0.0567694	0.0826714	0.386902	0.404965	0.23323	0.960438	-5.21994
COc1cc(Nc2ncnc3cccc(O[C@H](C)C(=O)N4CCOCC4)c23)ccc1Oc1ccc(C)nc1	CHEMBL411799	23	nM	7.63827	515.217	9	1	4.50382	TRUE	515.57	4.50382	9	1	3	0.362711	1	107.93	0.32535	0.410126	0.948128	0.0345144	0.393114	0.369428	0.393061	0.101158	0.02736	0.805864	0.941845	0.221448	0.632058	0.979439	0.998597	0.00445536	0.0121544	0.409201	0.169507	0.011071	0.0508147	0.0459948	0.930653	0.866248	0.688258	0.0391043	0.0398761	0.371417	0.167557	0.0931928	0.898021	-4.78614
Cc1cc(Nc2ncnc3cnc(N4CCOCC4)cc23)ccc1OC1CCN(C(=O)CC(C)(C)C)CC1	CHEMBL411192	23	nM	7.63827	518.301	8	1	4.71942	TRUE	518.662	4.71942	8	1	3	0.501222	0	92.71	0.167769	0.52856	0.801648	0.0241912	0.426518	0.178328	0.458771	0.182306	0.0265932	0.901686	0.52853	0.210798	0.370614	0.877358	0.995832	0.00958406	0.0172091	0.422135	0.166109	0.0428795	0.112102	0.0373539	0.954173	0.730626	0.761688	0.152046	0.172048	0.45453	0.304242	0.0998705	0.841931	-4.88947
NC1CCN(Cc2ccn3ncnc(Nc4ccc5c(cnn5Cc5cccc(F)c5)c4)c23)CC1	CHEMBL248108	23	nM	7.63827	470.234	8	2	3.9331	TRUE	470.556	3.9331	8	2	4	0.39091	0	89.3	0.296207	0.907967	0.843106	0.229032	0.346698	0.0971576	0.236542	0.463312	0.782219	0.684865	0.876204	0.30288	0.883077	0.656063	0.999311	0.0139163	0.017332	0.330791	0.187044	0.0139584	0.0503266	0.00445893	0.821423	0.83551	0.416487	0.0278118	0.0253355	0.0992248	0.0349048	0.229062	0.985454	-6.013
CCC1=C2C(Nc3ccc4c(cnn4Cc4ccccc4)c3)=NC=NC2N=C1NC(=O)OCC1CCNCC1	CHEMBL583218	23	nM	7.63827	524.265	9	3	4.1075	TRUE	524.629	4.1075	9	3	3	0.448753	1	117.29	0.205047	0.813464	0.838683	0.257611	0.848293	0.333119	0.882111	0.273757	0.355425	0.716482	0.876945	0.142312	0.627708	0.90199	0.999397	0.00477294	0.0094953	0.373728	0.176847	0.0107202	0.0807331	0.075806	0.840805	0.942524	0.780869	0.128409	0.0809141	0.613586	0.350224	0.230096	0.934636	-6.09526
Cc1ccc(Oc2ccc(Nc3ncnc4cccc(O[C@H](C)C(=O)N(C)C)c34)cc2C)cn1	CHEMBL256362	23	nM	7.63827	457.211	7	1	5.03304	TRUE	457.534	5.03304	7	1	3	0.416094	1	89.47	0.54238	0.48407	0.946539	0.145224	0.468228	0.503243	0.238908	0.208997	0.172391	0.86064	0.944793	0.404932	0.54431	0.932618	0.998312	0.00937467	0.0236042	0.499694	0.263742	0.0163856	0.0720055	0.032435	0.9488	0.930207	0.618618	0.047762	0.0495966	0.417988	0.0898593	0.108863	0.909146	-5.00103
C=CC(=O)N[C@@H]1Cn2c(c(-c3ccc(Oc4ccccc4)cc3)c3c(N)ncnc32)C1=C	CHEMBL4211949	23.2	nM	7.63451	423.17	6	2	4.1704	TRUE	423.476	4.1704	6	2	4	0.469932	1	95.06	0.786358	0.733678	0.779696	0.328053	0.744309	0.261112	0.586647	0.126659	0.277564	0.734775	0.776593	0.290861	0.443242	0.95208	0.992207	0.031977	0.0415983	0.580154	0.505094	0.0819118	0.157882	0.123739	0.812694	0.897625	0.806465	0.21028	0.253946	0.501183	0.633044	0.401673	0.888936	-5.19146
O=C(/C=C/C(=O)Nc1cc2c(Nc3ccc(F)c(Cl)c3)ncnc2cn1)NCCCN1CCOCC1	CHEMBL138940	24	nM	7.61979	513.169	8	3	2.8941	TRUE	513.961	2.8941	8	3	3	0.294849	0	121.37	0.659586	0.668562	0.591885	0.0546775	0.319945	0.0819635	0.221744	0.0973716	0.262105	0.566965	0.683126	0.185672	0.849511	0.929269	0.90439	0.081621	0.0245928	0.325249	0.176204	0.142348	0.127233	0.103101	0.597856	0.532949	0.667158	0.382267	0.189484	0.275356	0.667316	0.324889	0.799044	-5.23288
Clc1cc(Nc2ncnc3cccc(OC4CCOCC4)c23)ccc1OCc1ccccn1	CHEMBL193578	24	nM	7.61979	462.146	7	1	5.5586	TRUE	462.937	5.5586	7	1	3	0.384926	0	78.39	0.379881	0.477134	0.929043	0.552489	0.828267	0.26213	0.627735	0.170871	0.102794	0.739434	0.692398	0.355129	0.392791	0.965713	0.999127	0.00646196	0.0138714	0.640336	0.513411	0.0276994	0.109769	0.141819	0.897213	0.863253	0.864032	0.0618377	0.309477	0.405834	0.278116	0.222453	0.813932	-5.12705
C[C@H](Oc1cccc2ncnc(Nc3ccc4c(cnn4Cc4nccs4)c3)c12)C(=O)N(C)C	CHEMBL257198	24	nM	7.61979	473.163	9	1	4.0834	TRUE	473.562	4.0834	9	1	4	0.380234	1	98.06	0.444779	0.463942	0.91729	0.33088	0.597517	0.56898	0.405972	0.213045	0.125152	0.669076	0.975269	0.36009	0.389923	0.97383	0.998775	0.0074983	0.0156929	0.404169	0.227577	0.011752	0.0795734	0.0552026	0.8644	0.795679	0.588843	0.0488075	0.0409846	0.348213	0.14117	0.124756	0.847167	-5.2673
COc1cc2ncnc(Nc3ccc(F)c(Cl)c3)c2cc1OC	CHEMBL301018	24	nM	7.61979	333.068	5	1	4.1831	TRUE	333.75	4.1831	5	1	4	0.775739	0	56.27	0.444346	0.851437	0.977037	0.981411	0.772924	0.296096	0.163988	0.315595	0.124555	0.647374	0.930394	0.0860627	0.0426148	0.9885	0.999984	0.0219093	0.0388197	0.949848	0.581185	0.0559173	0.19504	0.0679137	0.979232	0.384351	0.731281	0.54099	0.087487	0.516427	0.402767	0.149927	0.605942	-4.3669
COc1cccc2ncnc(Nc3ccc(OCc4ccccn4)c(Cl)c3)c12	CHEMBL194389	24	nM	7.61979	392.104	6	1	5.0094	TRUE	392.846	5.0094	6	1	3	0.497106	0	69.16	0.729132	0.50242	0.926569	0.942976	0.912149	0.236392	0.34258	0.211332	0.465085	0.703272	0.951223	0.227658	0.204269	0.966914	0.999858	0.0138241	0.0201347	0.905591	0.627092	0.0644288	0.184663	0.138721	0.932027	0.675897	0.846063	0.203439	0.360911	0.496261	0.485544	0.250566	0.793453	-4.94884
COc1cc2ncnc(Nc3ccc(F)c(Cl)c3)c2cc1SCCCCCCC(=O)NO	CHEMBL596754	24.2	nM	7.61618	478.124	7	3	5.7225	TRUE	478.977	5.7225	7	3	3	0.14018	0	96.37	0.838293	0.596607	0.899453	0.487602	0.880354	0.314384	0.817903	0.251089	0.422209	0.861565	0.963234	0.318586	0.558571	0.931721	0.999601	0.00788741	0.0118826	0.792716	0.307537	0.0608582	0.168897	0.119297	0.829639	0.9304	0.807036	0.155387	0.150405	0.555762	0.638348	0.219135	0.867828	-5.38558
CC(C)O/N=C/c1c(N)ncnc1Nc1ccc2c(cnn2Cc2cccc(F)c2)c1	CHEMBL402293	25	nM	7.60206	419.187	8	2	4.0984	TRUE	419.464	4.0984	8	2	4	0.345317	0	103.24	0.492629	0.67936	0.856158	0.353577	0.880965	0.25706	0.622567	0.215378	0.293315	0.707569	0.966821	0.40657	0.35538	0.899321	0.99913	0.00936362	0.0304153	0.668789	0.518221	0.0389768	0.136304	0.0448881	0.850848	0.756901	0.602146	0.146746	0.0651921	0.337808	0.0898917	0.179909	0.927021	-5.3943
CO[C@@H]1COC2C1OC[C@H]2Oc1cc2ncnc(Nc3ccc(F)c(Cl)c3)c2cc1NC(=O)/C=C/CN(C)C	CHEMBL4112924	25	nM	7.60206	557.184	9	2	3.7822	TRUE	558.01	3.7822	9	2	3	0.380022	4	107.07	0.552315	0.52917	0.881993	0.0338345	0.179763	0.128573	0.0783053	0.0721443	0.0565358	0.77079	0.653067	0.221822	0.636352	0.974168	0.98753	0.0180427	0.0157944	0.239678	0.27357	0.0291145	0.0511721	0.0729092	0.828486	0.702173	0.66782	0.110554	0.0696439	0.204077	0.366877	0.16711	0.794824	-5.24078
C[C@@H](Oc1cccc2ncnc(Nc3ccc4c(cnn4Cc4nccs4)c3)c12)C(=O)N(C)C	CHEMBL257197	26	nM	7.58503	473.163	9	1	4.0834	TRUE	473.562	4.0834	9	1	4	0.380234	1	98.06	0.454148	0.475733	0.924557	0.339731	0.559766	0.569465	0.363052	0.230937	0.124965	0.669839	0.976303	0.364895	0.407652	0.973481	0.998861	0.00747018	0.0156329	0.408709	0.219239	0.011023	0.0755317	0.0497225	0.868804	0.79338	0.576307	0.0473305	0.037278	0.324015	0.131538	0.122383	0.853176	-5.27346
O=C(C#CCN1CCOCC1)Nc1cc2c(Nc3ccc(F)c(Cl)c3)ncnc2cn1	CHEMBL202556	26	nM	7.58503	440.116	7	2	2.835	TRUE	440.866	2.835	7	2	4	0.602486	0	92.27	0.444134	0.685449	0.858771	0.427657	0.443509	0.226474	0.522862	0.166352	0.123938	0.481231	0.775207	0.163766	0.848949	0.982916	0.996424	0.0338461	0.0156319	0.647802	0.250661	0.076349	0.100383	0.307988	0.888806	0.493081	0.760902	0.367373	0.254525	0.465772	0.687509	0.307568	0.780346	-4.64015
CS(=O)(=O)CCNCc1ccc(-c2cc3c(Nc4ccc(OCc5ccccc5)cc4)ncnc3cn2)o1	CHEMBL3409484	26	nM	7.58503	529.178	9	2	4.7416	TRUE	529.622	4.7416	9	2	3	0.233807	0	119.24	0.435276	0.455644	0.781174	0.47987	0.75194	0.327623	0.495241	0.223005	0.378192	0.694167	0.928452	0.462228	0.373002	0.93788	0.983584	0.0170153	0.0236675	0.322269	0.327722	0.0357293	0.0865931	0.141191	0.570239	0.921068	0.720213	0.0641419	0.224391	0.439955	0.28508	0.181791	0.971715	-5.4401
NC1CCN(Cc2ccn3ncnc(Nc4ccc(OCc5cnccn5)c(Cl)c4)c23)CC1	CHEMBL248321	26	nM	7.58503	464.184	9	2	3.4184	TRUE	464.961	3.4184	9	2	4	0.428194	0	106.49	0.28053	0.876913	0.895464	0.42456	0.360563	0.0771731	0.219347	0.408854	0.640152	0.688668	0.805916	0.194225	0.853836	0.725811	0.99924	0.00752435	0.0154623	0.43032	0.289297	0.0236178	0.0770767	0.00638856	0.792509	0.501877	0.408581	0.0335698	0.0404258	0.0632179	0.0704553	0.245008	0.941926	-5.93351
COc1cccc(Oc2ccc(Nc3ncnc4cc[nH]c34)cc2Cl)c1	CHEMBL1921813	26	nM	7.58503	366.088	5	2	5.1558	TRUE	366.808	5.1558	5	2	3	0.510346	0	72.06	0.570312	0.580108	0.902462	0.991776	0.975357	0.22307	0.68875	0.302789	0.745272	0.579996	0.974818	0.118877	0.104364	0.973018	0.99997	0.0099668	0.0191502	0.959057	0.707976	0.0925113	0.312226	0.088642	0.923128	0.727855	0.827513	0.372422	0.366833	0.820174	0.45136	0.249743	0.847416	-5.07274
C=CC(=O)Nc1ccc2ncnc(Nc3ccc(F)c(Br)c3)c2n1	CHEMBL53665	26	nM	7.58503	387.013	5	2	3.7945	TRUE	388.2	3.7945	5	2	4	0.66516	0	79.8	0.570347	0.838536	0.926346	0.87203	0.563089	0.234781	0.335495	0.16028	0.261571	0.538119	0.742161	0.167749	0.276738	0.983061	0.999724	0.12289	0.0854768	0.916657	0.304424	0.0510516	0.268611	0.209002	0.93838	0.45579	0.884431	0.639597	0.279518	0.783994	0.784378	0.437385	0.612172	-4.99083
Fc1cccc(Cn2ncc3cc(Nc4ncnn5ccc(CN6CCCNCC6)c45)ccc32)c1	CHEMBL392273	27	nM	7.56864	470.234	8	2	3.8053	TRUE	470.556	3.8053	8	2	4	0.393236	0	75.31	0.432514	0.84673	0.845016	0.440251	0.548026	0.206486	0.296863	0.418434	0.811878	0.663472	0.967837	0.419724	0.852525	0.855748	0.998856	0.0157882	0.0186617	0.328719	0.191351	0.0147157	0.0513065	0.0131236	0.825469	0.866508	0.466267	0.0235556	0.0276578	0.172179	0.0764326	0.257012	0.986736	-5.76053
CCOc1cc2ncnc(Nc3ccc4c(cnn4Cc4ccccc4)c3)c2cc1NC(=O)/C=C/CN1CCOCC1	CHEMBL3907533	27	nM	7.56864	563.264	9	2	4.997	TRUE	563.662	4.997	9	2	3	0.228893	0	106.43	0.39884	0.472633	0.749459	0.137208	0.660872	0.260381	0.654014	0.140409	0.155553	0.715093	0.808581	0.370206	0.579994	0.977986	0.991593	0.00856483	0.0126156	0.542191	0.215849	0.0329441	0.0825829	0.0726889	0.743296	0.921679	0.853597	0.1362	0.209263	0.657764	0.611254	0.239183	0.946658	-5.11283
CO/N=C/c1c(N)ncnc1Nc1ccc2c(ccn2Cc2cccc(F)c2)c1	CHEMBL257816	27	nM	7.56864	390.16	7	2	3.9248	TRUE	390.422	3.9248	7	2	4	0.384601	0	90.35	0.644017	0.791463	0.876253	0.747313	0.931798	0.262431	0.400479	0.247906	0.456373	0.66662	0.968375	0.347823	0.285475	0.905046	0.999374	0.0238702	0.0491607	0.813476	0.507819	0.0563757	0.212994	0.064037	0.865942	0.813927	0.627693	0.243111	0.138822	0.396411	0.158308	0.237822	0.911826	-5.34812
CN1C[C@@H](OC(=O)N2CCCCCCC2)C[C@H](C(=O)NO)[C@H]1C(=O)N1CCN(c2ccccc2)CC1	CHEMBL572045	27.5	nM	7.56067	501.295	7	2	1.9322	TRUE	501.628	1.9322	7	2	3	0.479787	3	105.66	0.268838	0.620788	0.464357	0.00593924	0.335549	0.2467	0.0717423	0.202069	0.0505026	0.822952	0.613474	0.0679961	0.715712	0.641508	0.950452	0.00503766	0.0338096	0.0300042	0.00931245	0.0131211	0.0562571	0.0196366	0.901249	0.447979	0.45712	0.0476024	0.0191755	0.0435077	0.162723	0.226391	0.681475	-5.15574
COc1cc2ncnc(N[C@H](C)c3ccccc3)c2cc1OCCCCCCC(=O)NO	CHEMBL605976	27.8	nM	7.55596	438.227	7	3	4.6462	TRUE	438.528	4.6462	7	3	4	0.214739	1	105.6	0.85297	0.770394	0.883549	0.411832	0.837681	0.248919	0.708174	0.244444	0.470264	0.845448	0.95107	0.251378	0.696712	0.792723	0.998903	0.00879708	0.0223621	0.589824	0.28014	0.047053	0.0898082	0.0262858	0.913129	0.906085	0.718152	0.161291	0.0613364	0.339905	0.377422	0.263424	0.942734	-5.40459
O=C1Cc2cc(Oc3ccc(Nc4ncnc5ccn(CCO)c45)cc3Cl)ccc2N1	CHEMBL2048791	28	nM	7.55284	435.11	7	3	4.1075	TRUE	435.871	4.1075	7	3	4	0.42109	0	101.3	0.285766	0.322694	0.787482	0.427398	0.608249	0.272454	0.541753	0.0977272	0.266473	0.614426	0.775569	0.192287	0.302207	0.972695	0.998126	0.0250653	0.0356601	0.566732	0.390542	0.0241019	0.144187	0.091457	0.718669	0.830634	0.603988	0.0736523	0.144022	0.641048	0.515571	0.173966	0.815066	-5.41219
O=C(NO)[C@H]1CC(CC(=O)N2CCCC2)CN[C@@H]1C(=O)N1CCN(c2ccccc2)CC1	CHEMBL495596	28	nM	7.55284	443.253	6	3	0.4474	TRUE	443.548	0.4474	6	3	4	0.450835	3	105.22	0.120745	0.635337	0.391785	0.0032511	0.135853	0.150872	0.0359534	0.217905	0.0172547	0.811231	0.145366	0.0595616	0.328362	0.358375	0.90358	0.0116348	0.0417637	0.0240384	0.00416969	0.00969411	0.0927541	0.00702321	0.66934	0.0761528	0.327591	0.0282193	0.0123358	0.00703644	0.109296	0.263252	0.550723	-5.48561
Cl.O=C(NO)[C@H]1CC(OC(=O)N2CCCC2)CN[C@@H]1C(=O)N1CC[C@H](c2ccccc2)C1	CHEMBL1204013	28	nM	7.55284	466.198	6	3	1.5088	TRUE	466.966	1.5088	6	3	4	0.457902	4	111.21	0.658967	0.485694	0.670357	0.0118393	0.155949	0.0791491	0.0420199	0.151273	0.112209	0.704798	0.473768	0.116256	0.683304	0.321696	0.887523	0.0231319	0.0332045	0.0271748	0.0113488	0.036777	0.192713	0.0123465	0.509832	0.114491	0.336778	0.128299	0.0207412	0.010887	0.231647	0.301787	0.458333	-5.58145
CCC1=C2C(Nc3ccc4c(cnn4Cc4ccccc4)c3)=NC=NC2N=C1NC(=O)OCCN1CCCCC1	CHEMBL566350	28	nM	7.55284	538.28	9	2	4.5938	TRUE	538.656	4.5938	9	2	3	0.457359	1	108.5	0.243754	0.924937	0.787364	0.327225	0.708598	0.224952	0.681956	0.4103	0.613452	0.677461	0.808286	0.13682	0.756911	0.81563	0.998952	0.00555051	0.00840408	0.350484	0.131504	0.00803133	0.066021	0.0310622	0.847697	0.960509	0.686345	0.101819	0.0627722	0.450921	0.256379	0.297198	0.964023	-5.79801
Oc1cccc(Nc2ccnc3[nH]c4ccc(Br)cc4c23)c1	CHEMBL3133833	29	nM	7.5376	353.016	3	3	4.9278	TRUE	354.207	4.9278	3	3	4	0.478456	0	60.94	0.679222	0.539132	0.764747	0.99737	0.878885	0.183038	0.601197	0.420954	0.851842	0.483317	0.789063	0.122811	0.0286106	0.957272	0.999984	0.0431405	0.0209718	0.973099	0.400673	0.192546	0.372378	0.131084	0.876383	0.401191	0.945437	0.333414	0.604927	0.977454	0.894799	0.705003	0.809043	-5.34359
C=CC(=O)Nc1cccc(Oc2cc(Nc3ccc(OCc4cccc(F)c4)c(Cl)c3)ncn2)c1	CHEMBL1928947	29	nM	7.5376	490.121	6	2	6.5085	TRUE	490.922	6.5085	6	2	3	0.260099	0	85.37	0.327425	0.469504	0.869958	0.254182	0.896403	0.417081	0.805606	0.10126	0.368821	0.773081	0.827011	0.490775	0.229239	0.963729	0.996947	0.00436714	0.0137395	0.526999	0.211241	0.0239382	0.135177	0.130675	0.655511	0.925872	0.760382	0.0373483	0.376053	0.681943	0.39669	0.148669	0.811774	-5.26671
OCCn1ccc2ncnc(Nc3ccc(Oc4cccc(OC(F)(F)F)c4)c(Cl)c3)c21	CHEMBL1923008	29	nM	7.5376	464.086	7	2	5.5115	TRUE	464.831	5.5115	7	2	3	0.375065	0	81.43	0.180554	0.514423	0.83124	0.905267	0.903281	0.311773	0.789788	0.182567	0.559026	0.550806	0.880495	0.256474	0.148313	0.945434	0.999471	0.00927883	0.0161499	0.720908	0.532047	0.0165869	0.122826	0.180855	0.84479	0.909093	0.644748	0.0336581	0.225001	0.841019	0.340104	0.130637	0.896926	-4.96885
C=CC(=O)Nc1cccc(-c2c[nH]c3ncnc(Nc4ccc(Cc5ccccc5)cc4)c23)c1	CHEMBL4763834	29	nM	7.5376	445.19	4	3	6.0838	TRUE	445.526	6.0838	4	3	3	0.265046	0	82.7	0.417659	0.561976	0.751837	0.665475	0.793092	0.349316	0.565615	0.257585	0.486562	0.666759	0.689742	0.445887	0.375223	0.934589	0.990108	0.0353648	0.0293754	0.699317	0.409406	0.0726512	0.197983	0.0951801	0.688748	0.944281	0.773318	0.170614	0.34335	0.757968	0.601721	0.303038	0.927269	-5.38158
CN(C(=O)c1ccccc1)C1CN[C@H](C(=O)N2CC[C@H](c3ccccc3)C2)[C@@H](C(=O)NO)C1	CHEMBL584960	29	nM	7.5376	450.227	5	3	1.6268	TRUE	450.539	1.6268	5	3	4	0.47478	4	101.98	0.290885	0.460225	0.742158	0.00731678	0.0998576	0.19798	0.0348349	0.136175	0.0741759	0.737401	0.557531	0.102906	0.580734	0.501094	0.978197	0.00556104	0.0151985	0.0248679	0.00729212	0.00424077	0.0558538	0.00258567	0.755048	0.189662	0.121475	0.00932211	0.00969571	0.0102382	0.0124159	0.285165	0.467903	-5.60621
CCC1=C2C(Nc3ccc4c(cnn4Cc4ccccc4)c3)=NC=NC2N=C1NC(=O)OCC1CCCNC1	CHEMBL584714	29	nM	7.5376	524.265	9	3	4.1075	TRUE	524.629	4.1075	9	3	3	0.448753	2	117.29	0.222768	0.839919	0.833568	0.296233	0.881976	0.328607	0.891041	0.305635	0.412702	0.708066	0.912705	0.129145	0.634502	0.897209	0.999611	0.00434969	0.00907192	0.409728	0.187514	0.0099892	0.0785151	0.0709707	0.862698	0.947866	0.774912	0.116002	0.0779071	0.616559	0.329531	0.239249	0.942897	-6.06469
O=C(NCCO)C1=Cc2c(ncnc2Nc2ccc(Oc3cccc(C(F)(F)F)c3)c(Cl)c2)NCC1	CHEMBL2348414	29	nM	7.5376	519.129	7	4	4.9922	TRUE	519.911	4.9922	7	4	3	0.348001	0	108.4	0.334486	0.532446	0.800328	0.593146	0.738672	0.213194	0.648239	0.176765	0.430726	0.670159	0.876014	0.350955	0.383477	0.939897	0.998871	0.0103893	0.0188943	0.450224	0.357403	0.0172247	0.0900366	0.112045	0.789541	0.879679	0.674819	0.0551536	0.167142	0.84507	0.622573	0.117821	0.924445	-5.20438
CCC1=C2C(Nc3ccc4c(cnn4Cc4ccccc4)c3)=NC=NC2N=C1NC(=O)OCC1CCCCN1	CHEMBL566559	30	nM	7.52288	524.265	9	3	4.25	TRUE	524.629	4.25	9	3	3	0.445732	2	117.29	0.257412	0.85286	0.815389	0.362208	0.904327	0.288863	0.896028	0.258159	0.464033	0.675277	0.880112	0.127318	0.628396	0.890138	0.999574	0.00462608	0.00907751	0.401083	0.238937	0.0112025	0.0843451	0.0838389	0.847919	0.953433	0.78257	0.126188	0.0987784	0.661753	0.372122	0.271573	0.940933	-6.03782
O=C(O[C@H]1CN[C@H](C#Cc2cc3ncnc(Nc4ccc(OCc5ccccn5)c(Cl)c4)c3s2)C1)N1CCOCC1	CHEMBL504117	30	nM	7.52288	590.15	10	2	4.6131	TRUE	591.093	4.6131	10	2	3	0.310937	2	110.73	0.433143	0.371767	0.787522	0.101351	0.559926	0.213619	0.532458	0.0914845	0.150493	0.686041	0.904796	0.157479	0.604688	0.968895	0.991266	0.0107562	0.014939	0.396204	0.239821	0.0540439	0.152523	0.260531	0.74912	0.855963	0.8506	0.16814	0.229251	0.691886	0.639412	0.282274	0.804715	-5.28286
Cc1ccc(Oc2ccc(Nc3ncnc4cccc(O[C@@H](C)C(=O)N(C)C)c34)cc2C)cn1	CHEMBL429760	30	nM	7.52288	457.211	7	1	5.03304	TRUE	457.534	5.03304	7	1	3	0.416094	1	89.47	0.550298	0.502619	0.951461	0.155806	0.428486	0.501155	0.20508	0.224928	0.176498	0.860814	0.945507	0.405746	0.562568	0.930827	0.998463	0.00946498	0.0237695	0.501058	0.250232	0.0153774	0.0685178	0.0294961	0.951333	0.93018	0.603017	0.0464807	0.0439794	0.386745	0.0802807	0.107302	0.914368	-5.00327
O=C(/C=C/CN1CC2CCC1C(=O)C2)Nc1cc2c(Nc3ccc(F)c(Cl)c3)ncnc2s1	CHEMBL3233785	30	nM	7.52288	485.109	7	2	4.7755	TRUE	485.972	4.7755	7	2	4	0.488687	2	87.22	0.540764	0.959088	0.777769	0.249036	0.699029	0.168301	0.666858	0.160564	0.468694	0.657	0.671736	0.18965	0.715135	0.92928	0.999083	0.0444803	0.0162183	0.566435	0.242712	0.0296514	0.129819	0.0908338	0.901572	0.836001	0.858228	0.551214	0.285451	0.68525	0.705644	0.318749	0.769539	-5.37122
CCc1c(C(=O)NCCCn2ccnc2)cn2ncnc(Nc3ccc4c(cnn4Cc4ccccc4)c3)c12	CHEMBL193681	30	nM	7.52288	519.25	9	2	4.4499	TRUE	519.613	4.4499	9	2	3	0.259101	0	106.96	0.365232	0.561685	0.702531	0.395588	0.964437	0.257142	0.972674	0.143386	0.791665	0.779263	0.989231	0.268446	0.459995	0.898411	0.999764	0.00294154	0.00544799	0.473313	0.533174	0.00876481	0.0484298	0.0293194	0.802364	0.982955	0.675218	0.0176014	0.10649	0.652885	0.080178	0.292917	0.990612	-5.94529
FC(F)(F)c1cccc(Oc2ccc(Nc3ncnc4cc[nH]c34)cc2Cl)c1	CHEMBL1922905	30	nM	7.52288	404.065	4	2	6.166	TRUE	404.779	6.166	4	2	3	0.426922	0	62.83	0.207779	0.773451	0.87826	0.987768	0.945095	0.279068	0.663438	0.299676	0.563966	0.542594	0.856102	0.285789	0.145928	0.961583	0.999943	0.0152485	0.0145936	0.90161	0.691927	0.111187	0.335391	0.180846	0.894899	0.834575	0.817884	0.166759	0.253935	0.927215	0.567195	0.151378	0.899943	-5.0743
O=C(O[C@H]1CN[C@H](C#Cc2cc3ncnc(Nc4ccc5c(cnn5Cc5cccc(F)c5)c4)c3s2)C1)N1CCOCC1	CHEMBL510845	30	nM	7.52288	597.196	10	2	4.5228	TRUE	597.676	4.5228	10	2	3	0.285082	2	106.43	0.382549	0.499075	0.746621	0.100114	0.524607	0.233451	0.600422	0.0879271	0.114501	0.627387	0.941007	0.185067	0.561956	0.975487	0.995877	0.00953871	0.0166931	0.250844	0.22096	0.0307347	0.133289	0.156198	0.670532	0.907723	0.81627	0.166735	0.114917	0.707266	0.576867	0.236103	0.901808	-5.17164
FC(F)(F)c1ccc(/C=C/c2nc(CNc3ccc(Br)cc3)co2)cc1	CHEMBL5189852	30	nM	7.52288	422.024	3	1	6.2384	TRUE	423.232	6.2384	3	1	3	0.528254	0	38.06	0.196355	0.859805	0.867563	0.90403	0.933505	0.288085	0.486174	0.132347	0.319661	0.562252	0.408503	0.627606	0.0723849	0.927884	0.999803	0.0171877	0.0186302	0.737778	0.51534	0.12725	0.484837	0.199829	0.868822	0.733598	0.884357	0.133235	0.43592	0.935826	0.621938	0.377028	0.768799	-5.05727
CN(CCO)c1cc2c(Nc3ccc4c(cnn4Cc4ccccc4)c3)ncnc2cn1	CHEMBL3409482	30	nM	7.52288	425.196	8	2	3.5949	TRUE	425.496	3.5949	8	2	4	0.411614	0	91.99	0.337928	0.313227	0.7703	0.591018	0.43118	0.354934	0.251053	0.28796	0.269777	0.448929	0.669034	0.396827	0.427586	0.942454	0.997041	0.0417896	0.0350169	0.699897	0.307996	0.0146686	0.0799869	0.0488732	0.786542	0.691931	0.450307	0.0723064	0.0554717	0.622573	0.317523	0.171631	0.930679	-5.36825
CNc1cc2c(Nc3ccc(Oc4ccc(C(=O)NCC(C)(C)C)cc4)c(C)c3)ncnc2cn1	CHEMBL228925	30	nM	7.52288	470.243	7	3	5.68672	TRUE	470.577	5.68672	7	3	3	0.319042	0	101.06	0.575304	0.321729	0.90211	0.1377	0.522661	0.379041	0.504792	0.249851	0.11635	0.850305	0.575689	0.597724	0.481903	0.886465	0.993536	0.0114511	0.019392	0.668031	0.302678	0.0422349	0.145262	0.051377	0.874662	0.927461	0.710279	0.216128	0.26309	0.782363	0.322541	0.159157	0.919687	-5.35456
O=C(NO)[C@H]1C[C@@H](OC(=O)N2CCCC2)CN[C@@H]1C(=O)N1CC=C(c2ccccc2)CC1	CHEMBL585304	30	nM	7.52288	442.222	6	3	1.3868	TRUE	442.516	1.3868	6	3	4	0.48006	3	111.21	0.581521	0.626346	0.666787	0.0216809	0.175359	0.11344	0.0567235	0.161807	0.0517367	0.700245	0.324298	0.0684825	0.707925	0.54275	0.945896	0.0161273	0.0393371	0.0564898	0.0135348	0.0303015	0.194472	0.0165965	0.722712	0.154297	0.427557	0.134332	0.0252169	0.0157815	0.264581	0.27723	0.484377	-5.4534
CO/N=C/c1c(N)ncnc1Nc1ccc2c(cnn2Cc2cccc(Cl)c2)c1	CHEMBL255656	30	nM	7.52288	407.126	8	2	3.8341	TRUE	407.865	3.8341	8	2	4	0.371582	0	103.24	0.326479	0.722582	0.868026	0.631293	0.886433	0.186881	0.47556	0.159524	0.294838	0.622759	0.933574	0.319768	0.252437	0.930048	0.999021	0.00955861	0.0245765	0.725313	0.510245	0.0384106	0.131129	0.0478403	0.855646	0.672621	0.625287	0.0909321	0.118638	0.228794	0.104017	0.247111	0.827612	-5.29237
C[C@@H](Oc1cccc2ncnc(Nc3ccc(OCc4ccccn4)c(Cl)c3)c12)C(=O)N(C)CCO	CHEMBL258313	31	nM	7.50864	507.167	8	2	4.2188	TRUE	507.978	4.2188	8	2	3	0.328167	1	109.7	0.290408	0.238454	0.888265	0.288458	0.605037	0.458137	0.395446	0.129958	0.220911	0.718785	0.924741	0.308601	0.433005	0.939516	0.998696	0.00626524	0.0114883	0.440399	0.293966	0.00673575	0.0544597	0.0545096	0.897158	0.860846	0.484813	0.0122474	0.0466024	0.386672	0.0868527	0.113951	0.874893	-5.2321
C=CCNC1=C2C[C@@H](C)C[C@H](OC)[C@H](O)[C@@H](C)/C=C(\C)[C@H](OC(N)=O)[C@@H](OC)/C=C\C=C(/C)C(=O)NC(=CC1=O)C2=O	CHEMBL109480	31	nM	7.50864	585.305	9	4	2.5376	TRUE	585.698	2.5376	9	4	3	0.270594	6	166.28	0.741253	0.349096	0.683935	0.00542856	0.0750302	0.0729026	0.0682972	0.0253545	0.0619954	0.657662	0.285575	0.162254	0.402256	0.777406	0.954026	0.0619844	0.0578878	0.0331356	0.0566683	0.0182304	0.0645867	0.0396716	0.543426	0.828314	0.349317	0.0989559	0.0619966	0.348559	0.41284	0.155357	0.377954	-5.39218
CN(C)C(=O)O[C@H]1C[C@H](C(=O)NO)[C@@H](C(=O)N2CCN(c3ccccc3)CC2)N(C)C1	CHEMBL567940	31	nM	7.50864	433.233	7	2	0.2277	TRUE	433.509	0.2277	7	2	4	0.517189	3	105.66	0.336489	0.698153	0.547565	0.00142501	0.0811247	0.226863	0.00792838	0.116368	0.0119326	0.766246	0.0761516	0.060461	0.686391	0.48114	0.91949	0.0066756	0.0491687	0.0114831	0.00353647	0.00606737	0.0433311	0.0026156	0.84321	0.0702662	0.165583	0.00851796	0.00293263	0.00167991	0.0338923	0.177694	0.431643	-5.16011
OCCNC1CCN(Cc2ccn3ncnc(Nc4ccc5c(cnn5Cc5cccc(F)c5)c4)c23)CC1	CHEMBL247104	31	nM	7.50864	514.26	9	3	3.5563	TRUE	514.609	3.5563	9	3	3	0.276895	0	95.54	0.168635	0.733269	0.621045	0.152766	0.334981	0.0859187	0.182099	0.463694	0.768815	0.621344	0.728032	0.297472	0.75022	0.646031	0.997253	0.0122105	0.0143822	0.27576	0.0714886	0.0058614	0.0476435	0.00262199	0.665067	0.803637	0.340581	0.0105207	0.0172365	0.10716	0.0343244	0.214728	0.986619	-5.93318
COc1cc2ncnc(Nc3ccc(F)c(Cl)c3)c2cc1NC(=O)/C=C/CN(C(C)C)C(C)C	CHEMBL3950549	32	nM	7.49485	485.199	6	2	5.788	TRUE	485.991	5.788	6	2	3	0.373429	0	79.38	0.612042	0.810995	0.854956	0.290977	0.544827	0.190853	0.298002	0.322147	0.661331	0.828826	0.785468	0.470392	0.741447	0.800818	0.990991	0.0404483	0.0197726	0.707024	0.214528	0.0649968	0.0895566	0.0483243	0.908584	0.864182	0.519847	0.149309	0.152936	0.390818	0.370715	0.244566	0.905369	-5.09009
NC1CCN(Cc2ccn3ncnc(Nc4ccc(OCc5cccc(F)c5)c(Cl)c4)c23)CC1	CHEMBL247710	32	nM	7.49485	480.184	7	2	4.7675	TRUE	480.975	4.7675	7	2	4	0.396446	0	80.71	0.28457	0.891972	0.88541	0.445615	0.563454	0.13035	0.36555	0.540587	0.862034	0.785919	0.861914	0.272379	0.834651	0.657881	0.999743	0.0145672	0.0140851	0.459856	0.317662	0.0259119	0.0817208	0.0155611	0.841312	0.950226	0.578346	0.0312415	0.0942619	0.20318	0.0880408	0.237816	0.974014	-5.62431
CS(=O)(=O)CCNC(=O)O[C@H]1CN[C@H](C#Cc2cc3ncnc(Nc4ccc(OCc5cccc(F)c5)c(Cl)c4)c3s2)C1	CHEMBL504034	32	nM	7.49485	643.113	10	3	4.6592	TRUE	644.15	4.6592	10	3	3	0.222934	2	131.54	0.533173	0.637961	0.768888	0.481607	0.871911	0.460693	0.825133	0.249968	0.438797	0.754653	0.987701	0.232931	0.564544	0.970623	0.998349	0.00691527	0.0110513	0.154355	0.157061	0.0281789	0.10608	0.355291	0.547894	0.920067	0.839519	0.0797538	0.171871	0.538422	0.452668	0.216658	0.899461	-5.38255
CNC(=O)c1cccc(C#Cc2cncnc2Nc2ccc(OCc3cccc(F)c3)c(Cl)c2)c1	CHEMBL207410	32	nM	7.49485	486.126	5	2	5.3511	TRUE	486.934	5.3511	5	2	3	0.359171	0	76.14	0.297937	0.297294	0.865688	0.312823	0.920543	0.474495	0.90372	0.112701	0.288811	0.792835	0.918433	0.467259	0.170582	0.960807	0.999445	0.00239473	0.00794025	0.607283	0.398668	0.016849	0.103755	0.138127	0.780716	0.93661	0.718567	0.0275226	0.45259	0.737349	0.273088	0.170453	0.881689	-5.31504
C[C@@H](Oc1cccc2ncnc(Nc3ccc4c(cnn4Cc4ccccn4)c3)c12)C(N)=O	CHEMBL256363	32	nM	7.49485	439.176	8	2	3.419	TRUE	439.479	3.419	8	2	4	0.398491	1	120.84	0.545418	0.668258	0.962395	0.389745	0.469044	0.421546	0.377643	0.176695	0.126975	0.652656	0.882452	0.352403	0.68025	0.945914	0.999024	0.0174358	0.0308726	0.30307	0.222601	0.0318039	0.104461	0.0655843	0.875268	0.608466	0.464794	0.0939277	0.0403578	0.265156	0.238291	0.100869	0.837175	-5.58245
CC(=O)Nc1ccc2ncnc(Nc3ccc(OCc4cccc(F)c4)c(Cl)c3)c2c1	CHEMBL3814846	32.3	nM	7.4908	436.11	5	2	5.7033	TRUE	436.874	5.7033	5	2	3	0.404972	0	76.14	0.445809	0.474719	0.888596	0.567434	0.858153	0.383865	0.564491	0.131656	0.32697	0.777824	0.788877	0.431238	0.177151	0.973455	0.999323	0.0135414	0.0225158	0.785635	0.370736	0.0416027	0.21852	0.11203	0.800699	0.858736	0.804496	0.0994068	0.28655	0.664251	0.512866	0.137599	0.806883	-5.20606
CN1CCN(c2ccc(Nc3ncnc4cc5oc(=O)n(CCOC(=O)CBr)c5cc34)cc2Cl)CC1	CHEMBL3897363	33	nM	7.48149	574.073	10	1	3.6246	TRUE	575.851	3.6246	10	1	3	0.261213	0	105.73	0.379528	0.759554	0.600153	0.508666	0.636189	0.160701	0.249961	0.195578	0.282605	0.582437	0.825556	0.197616	0.71369	0.96253	0.99206	0.0533741	0.034131	0.18097	0.201012	0.0473979	0.077133	0.189145	0.853207	0.767731	0.703802	0.126412	0.134572	0.21632	0.342553	0.351188	0.877282	-5.01684
COCC#CC(=O)Nc1ccc2ncnc(Nc3cccc(Br)c3)c2c1	CHEMBL91009	33	nM	7.48149	410.038	5	2	3.7242	TRUE	411.259	3.7242	5	2	4	0.64042	0	76.14	0.700216	0.876341	0.887909	0.947317	0.762519	0.353504	0.44993	0.295115	0.369434	0.661443	0.856473	0.189032	0.411171	0.979784	0.999862	0.0410506	0.0242374	0.893717	0.36978	0.0460096	0.195519	0.150036	0.960278	0.762738	0.733884	0.334154	0.331964	0.628822	0.582974	0.381379	0.807324	-4.87549
NC1CCN(Cc2ccn3ncnc(Nc4cc(Cl)cc(Cl)c4)c23)CC1	CHEMBL1645475	34	nM	7.46852	390.113	6	2	3.7028	TRUE	391.306	3.7028	6	2	4	0.709756	0	71.48	0.187547	0.990493	0.912467	0.427049	0.229888	0.06708	0.0583726	0.536456	0.909817	0.520499	0.225797	0.154791	0.839955	0.530697	0.999795	0.0120501	0.0257712	0.382223	0.158221	0.0107939	0.0790653	0.00131273	0.908681	0.477432	0.231053	0.0104642	0.0140868	0.0383223	0.0189836	0.380787	0.955608	-5.46057
C[C@@H](Oc1cccc2ncnc(Nc3ccc(OCc4ccccn4)c(Cl)c3)c12)C(=O)N(C)C	CHEMBL428777	34	nM	7.46852	477.157	7	1	4.8563	TRUE	477.952	4.8563	7	1	4	0.387424	1	89.47	0.439096	0.49562	0.933311	0.318799	0.700072	0.44759	0.342801	0.165099	0.226323	0.81443	0.924605	0.361611	0.463268	0.950686	0.998539	0.00630911	0.0136957	0.516299	0.350219	0.0149057	0.0726651	0.053704	0.952246	0.888859	0.677569	0.0317298	0.0654278	0.308621	0.0898408	0.146084	0.845456	-5.1652
NC1CCN(Cc2ccn3ncnc(Nc4ccc5c(cnn5Cc5cccnc5)c4)c23)CC1	CHEMBL247915	34	nM	7.46852	453.239	9	2	3.189	TRUE	453.554	3.189	9	2	4	0.407031	0	102.19	0.198009	0.867246	0.803341	0.179831	0.231216	0.0779223	0.226032	0.356767	0.589118	0.599525	0.793438	0.156592	0.850885	0.567135	0.998738	0.0111372	0.0172676	0.379697	0.173111	0.0164926	0.0635392	0.00229034	0.776197	0.381563	0.219112	0.0144473	0.0238971	0.0696955	0.0403109	0.256005	0.964349	-6.20844
O=C(O[C@H]1CN[C@H](C#Cc2cc3ncnc(Nc4ccc5c(cnn5Cc5cc(F)ccc5F)c4)c3s2)C1)N1CCOCC1	CHEMBL500072	35	nM	7.45593	615.186	10	2	4.6619	TRUE	615.666	4.6619	10	2	3	0.275265	2	106.43	0.417398	0.522715	0.765927	0.0768183	0.509269	0.203354	0.584209	0.0775033	0.115803	0.62726	0.940381	0.191527	0.553825	0.979965	0.99617	0.00883934	0.0159362	0.227312	0.221942	0.0251939	0.123451	0.139305	0.658388	0.905049	0.823702	0.142307	0.0991844	0.698136	0.556609	0.204629	0.89186	-4.96851
O=C(CCl)OCCn1c(=O)oc2cc3ncnc(Nc4ccc(N5CCOCC5)c(Cl)c4)c3cc21	CHEMBL3982289	35	nM	7.45593	517.092	10	1	3.5533	TRUE	518.357	3.5533	10	1	3	0.290051	0	111.72	0.28952	0.680684	0.691186	0.544105	0.741316	0.0974987	0.515953	0.0806745	0.15019	0.354907	0.860608	0.125969	0.399674	0.98006	0.996084	0.0338844	0.0246932	0.38133	0.352255	0.0602709	0.130509	0.333593	0.7915	0.667178	0.8068	0.271043	0.264163	0.48272	0.476853	0.324389	0.75905	-4.89439
Cc1ccc(Oc2ccc(Nc3ncnc4cccc(O[C@@H](C)C(=O)N5CCOCC5)c34)cc2C)cn1	CHEMBL430407	35	nM	7.45593	499.222	8	1	4.80364	TRUE	499.571	4.80364	8	1	4	0.387091	1	98.7	0.323415	0.452414	0.932517	0.0487506	0.489109	0.385203	0.476362	0.125917	0.053427	0.809686	0.922738	0.29319	0.647132	0.970252	0.998474	0.00565795	0.0170281	0.388714	0.221503	0.0151138	0.0817216	0.0658729	0.914635	0.894863	0.743713	0.049422	0.0602963	0.484419	0.167823	0.109402	0.896303	-4.82058
NC1CCN(Cc2ccn3ncnc(Nc4ccc5c(cnn5Cc5ccccn5)c4)c23)CC1	CHEMBL247914	35	nM	7.45593	453.239	9	2	3.189	TRUE	453.554	3.189	9	2	4	0.407031	0	102.19	0.22887	0.880512	0.79015	0.104243	0.129609	0.0681021	0.0995695	0.362082	0.506156	0.623601	0.47	0.188378	0.817088	0.537095	0.995711	0.0117809	0.0233698	0.261064	0.0912778	0.0156594	0.0795425	0.00206043	0.714566	0.346621	0.200447	0.0170325	0.0185076	0.051311	0.0430327	0.234435	0.95171	-6.19506
O=C(/C=C/CN1CCOCC1)Nc1cc2c(Nc3ccc(F)c(Cl)c3)ncnc2cn1	CHEMBL3958006	35	nM	7.45593	442.132	7	2	3.3878	TRUE	442.882	3.3878	7	2	4	0.565105	0	92.27	0.558569	0.747717	0.816972	0.282487	0.50639	0.155606	0.391101	0.142513	0.225425	0.535552	0.768168	0.181609	0.830711	0.965499	0.993871	0.0685555	0.0231755	0.608743	0.271187	0.104208	0.145563	0.201447	0.854663	0.472709	0.730328	0.354261	0.215244	0.428521	0.665252	0.314486	0.768795	-5.00647
NC1CCN(Cc2ccn3ncnc(Nc4ccc(OCc5cccnc5)c(Cl)c4)c23)CC1	CHEMBL391387	36	nM	7.4437	463.189	8	2	4.0234	TRUE	463.973	4.0234	8	2	4	0.427105	0	93.6	0.28527	0.870568	0.8808	0.548577	0.595837	0.0840128	0.38317	0.458831	0.882763	0.688207	0.892499	0.19425	0.885325	0.616083	0.99976	0.0104641	0.0125725	0.527346	0.410727	0.0311945	0.0865439	0.00751578	0.883051	0.727273	0.444983	0.0225962	0.0763633	0.121884	0.064128	0.275358	0.96404	-5.85965
Nc1ccc(C#Cc2cncnc2Nc2ccc(OCc3cccc(F)c3)c(Cl)c2)cc1	CHEMBL205966	36	nM	7.4437	444.115	5	2	5.5737	TRUE	444.897	5.5737	5	2	3	0.310586	0	73.06	0.574095	0.30299	0.85942	0.487262	0.966547	0.238743	0.833726	0.089612	0.524884	0.739178	0.962718	0.397256	0.110528	0.944453	0.999766	0.0027863	0.00918746	0.838296	0.765291	0.0491902	0.168704	0.175101	0.652954	0.88461	0.779858	0.0441512	0.51455	0.741177	0.322897	0.240484	0.901185	-5.27015
C=CC(=O)Nc1cc(Nc2ncc(Cl)c(Nc3ccccc3S(=O)(=O)C(C)C)n2)c(OC)cc1N(C)CCN(C)C	CHEMBL4473365	37	nM	7.4318	601.224	10	3	4.9302	TRUE	602.161	4.9302	10	3	3	0.231912	0	128.79	0.34988	0.516351	0.724414	0.118467	0.673685	0.359069	0.317681	0.165013	0.435122	0.852907	0.927606	0.512061	0.439117	0.900089	0.983513	0.00810657	0.00730608	0.2009	0.216759	0.0272666	0.0289615	0.0550312	0.732846	0.875038	0.590361	0.0353836	0.158607	0.437516	0.28803	0.159486	0.890026	-5.17026
CCC1=C2C(Nc3ccc4c(cnn4Cc4ccccc4)c3)=NC=NC2N=C1NC(=O)OCCC1CCNCC1	CHEMBL578044	37	nM	7.4318	538.28	9	3	4.4976	TRUE	538.656	4.4976	9	3	3	0.409608	1	117.29	0.205387	0.822179	0.834129	0.279863	0.874195	0.338036	0.899315	0.265314	0.40234	0.73127	0.895263	0.144549	0.632918	0.893639	0.999534	0.00458213	0.00921456	0.388615	0.186857	0.0102924	0.0800575	0.0743829	0.841131	0.956742	0.791691	0.121078	0.0900577	0.635734	0.347734	0.246417	0.938135	-6.10696
CCN(CC)CC#CC(=O)Nc1ccc2ncnc(Nc3cccc(Br)c3)c2c1	CHEMBL328704	38	nM	7.42022	451.101	5	2	4.4196	TRUE	452.356	4.4196	5	2	4	0.542318	0	70.15	0.715956	0.933749	0.797997	0.869345	0.628807	0.335017	0.375737	0.482348	0.809535	0.657823	0.76481	0.537852	0.798632	0.882173	0.996444	0.0547934	0.0198358	0.632371	0.242325	0.0350606	0.119836	0.110383	0.88678	0.894371	0.59047	0.157585	0.261189	0.426706	0.373435	0.562595	0.941461	-5.05941
NCc1cccc(C#Cc2cncnc2Nc2ccc(OCc3cccc(F)c3)c(Cl)c2)n1	CHEMBL206003	38	nM	7.42022	459.126	6	2	4.8452	TRUE	459.912	4.8452	6	2	4	0.400954	0	85.95	0.43585	0.292046	0.89409	0.561892	0.942634	0.302686	0.831107	0.146164	0.54239	0.779148	0.973219	0.336707	0.239605	0.882007	0.999808	0.00507391	0.00889995	0.75608	0.658839	0.0450641	0.109502	0.204226	0.797251	0.88767	0.687928	0.0588541	0.506567	0.684336	0.299824	0.164279	0.861685	-5.4394
NCC1CCN(Cc2ccn3ncnc(Nc4ccc5c(cnn5Cc5cccc(F)c5)c4)c23)CC1	CHEMBL391778	38	nM	7.42022	484.25	8	2	4.1807	TRUE	484.583	4.1807	8	2	4	0.360305	0	89.3	0.307773	0.909242	0.835262	0.250139	0.385968	0.0983885	0.284946	0.47716	0.849319	0.714449	0.924186	0.331872	0.894769	0.661675	0.999314	0.0118236	0.0131191	0.333871	0.194145	0.0115449	0.0423819	0.00534969	0.839265	0.885933	0.453766	0.0256598	0.0294328	0.11135	0.0354414	0.237478	0.988111	-6.02823
C#Cc1cccc(Nc2ncnc3cc(OC)c(OCCCCCC(=O)NO)cc23)c1	CHEMBL598164	38.2	nM	7.41794	420.18	7	3	3.8079	TRUE	420.469	3.8079	7	3	4	0.198198	0	105.6	0.953475	0.616839	0.900467	0.436824	0.53179	0.240043	0.37996	0.185646	0.451823	0.761537	0.9616	0.253379	0.68573	0.907768	0.998605	0.0238751	0.0552428	0.801253	0.268217	0.133591	0.207386	0.0409838	0.87103	0.725776	0.833006	0.359366	0.0575663	0.410764	0.650945	0.263509	0.887241	-5.14056
C#Cc1cccc(Nc2ncnc3cc(OC)c(OCCCCC(=O)NO)cc23)c1	CHEMBL599398	38.4	nM	7.41567	406.164	7	3	3.4178	TRUE	406.442	3.4178	7	3	4	0.216371	0	105.6	0.960233	0.64207	0.921613	0.461903	0.443915	0.230047	0.268039	0.164197	0.40894	0.724038	0.957946	0.253334	0.687156	0.930483	0.998873	0.0245256	0.0485569	0.833568	0.242961	0.133616	0.200028	0.0363747	0.880584	0.572781	0.824571	0.331586	0.0453772	0.331222	0.632561	0.261232	0.852118	-5.07802
O=C1CNCCN(Cc2ccn3ncnc(Nc4ccc5c(cnn5Cc5cccc(F)c5)c4)c23)C1	CHEMBL234580	39	nM	7.40894	484.214	9	2	2.9843	TRUE	484.539	2.9843	9	2	4	0.382855	0	92.38	0.322817	0.803695	0.848975	0.252264	0.547111	0.232787	0.416613	0.359269	0.494829	0.661827	0.954265	0.380164	0.704054	0.912381	0.999162	0.0212523	0.018076	0.381902	0.110471	0.0072795	0.0455183	0.0263171	0.811297	0.865311	0.58544	0.0462516	0.0316753	0.18212	0.155512	0.184217	0.945509	-5.65259
COC[C@@H]1CCCN1/N=C/c1c(N)ncnc1Nc1ccc2c(cnn2Cc2cccc(F)c2)c1	CHEMBL456758	39	nM	7.40894	474.229	9	2	3.7842	TRUE	474.544	3.7842	9	2	4	0.374371	1	106.48	0.637459	0.697564	0.915662	0.137551	0.751448	0.179798	0.627129	0.134872	0.109655	0.783746	0.969683	0.229105	0.686133	0.941802	0.999735	0.00461242	0.0170744	0.660367	0.582455	0.0290651	0.0625311	0.0300176	0.933121	0.82263	0.675631	0.120631	0.0457004	0.297953	0.186004	0.165574	0.968856	-5.37534
COCCCOc1cc2ncnc(Nc3ccc(F)c(Cl)c3)c2cc1NC(=O)/C=C/CN(C)C	CHEMBL4474073	39.26	nM	7.40605	487.179	7	2	4.6375	TRUE	487.963	4.6375	7	2	4	0.300707	0	88.61	0.62739	0.749629	0.857219	0.12204	0.307505	0.21476	0.11994	0.272275	0.215232	0.840645	0.735625	0.380919	0.686673	0.912449	0.986532	0.021254	0.0198262	0.593861	0.213837	0.0473325	0.0562441	0.0356058	0.894754	0.878908	0.543775	0.0998833	0.0834477	0.233576	0.320948	0.188808	0.896728	-4.98966
CCc1c(NC(=O)OCCn2ccnc2)cn2ncnc(Nc3ccc4c(cnn4Cc4ccccc4)c3)c12	CHEMBL412367	40	nM	7.39794	521.229	10	2	4.8785	TRUE	521.585	4.8785	10	2	3	0.278579	0	116.19	0.326781	0.574744	0.766769	0.622118	0.966408	0.281528	0.971835	0.0999085	0.820316	0.656636	0.992452	0.197576	0.463793	0.942755	0.999637	0.00431958	0.0101507	0.574565	0.452121	0.0119575	0.0571339	0.0880677	0.794	0.971108	0.723108	0.0357133	0.114851	0.638851	0.214494	0.190442	0.977616	-5.7126
CS(=O)(=O)O[C@H]1CN[C@H](C#Cc2cc3ncnc(Nc4ccc(OCc5cccc(F)c5)c(Cl)c4)c3s2)C1	CHEMBL500115	40	nM	7.39794	572.076	9	2	4.8646	TRUE	573.071	4.8646	9	2	3	0.238962	2	102.44	0.662529	0.576554	0.866782	0.328889	0.739163	0.314757	0.76596	0.139432	0.258546	0.714261	0.894844	0.481783	0.461294	0.973624	0.999105	0.00508234	0.010509	0.41795	0.453351	0.0210896	0.116436	0.224477	0.75605	0.945812	0.896982	0.0860593	0.213449	0.792192	0.405623	0.392649	0.911044	-5.31842
C=CC(=O)Nc1cc2c(Nc3ccc(F)c(Cl)c3)ncnc2s1	CHEMBL3233767	40	nM	7.39794	348.025	5	2	4.3519	TRUE	348.79	4.3519	5	2	4	0.687677	0	66.91	0.560594	0.865176	0.867862	0.84906	0.714831	0.305759	0.50261	0.112519	0.236442	0.569996	0.69967	0.174327	0.264656	0.987646	0.999643	0.0876538	0.0741548	0.908689	0.518963	0.117846	0.34366	0.247612	0.923522	0.372601	0.907047	0.670415	0.375966	0.847182	0.810738	0.520401	0.442241	-4.72217
CCc1c(C(=O)O)cn2ncnc(Nc3ccc4c(cnn4Cc4ccccc4)c3)c12	CHEMBL196438	40	nM	7.39794	412.165	7	2	4.1315	TRUE	412.453	4.1315	7	2	4	0.435196	0	97.34	0.215488	0.359891	0.920104	0.140432	0.320015	0.291892	0.419729	0.0264964	0.0762277	0.143017	0.1952	0.388475	0.347655	0.979248	0.96583	0.0174695	0.0570484	0.179012	0.145947	0.0228959	0.143772	0.161783	0.385725	0.312638	0.431118	0.080517	0.0297446	0.31091	0.113787	0.188017	0.360401	-5.73471
FC(F)(F)Oc1cccc(Oc2ccc(Nc3ncnc4cc[nH]c34)cc2Cl)c1	CHEMBL1922998	41	nM	7.38722	420.06	5	2	6.0458	TRUE	420.778	6.0458	5	2	3	0.411201	0	72.06	0.364776	0.671324	0.884712	0.979275	0.931552	0.304391	0.705972	0.256637	0.639988	0.534422	0.850007	0.272495	0.146077	0.970183	0.999815	0.00915071	0.0136741	0.921369	0.505448	0.0758304	0.331988	0.127117	0.851694	0.732203	0.749441	0.164152	0.306357	0.890293	0.483946	0.195727	0.861834	-5.04918
C[C@H](c1cccc(F)c1)n1ncc2cc(Nc3ncnn4ccc(COC[C@@H]5CNCCO5)c34)ccc21	CHEMBL245278	41	nM	7.38722	501.229	9	2	4.076	TRUE	501.566	4.076	9	2	3	0.331205	2	90.53	0.426535	0.612566	0.877186	0.0857263	0.51707	0.1484	0.407434	0.150594	0.172474	0.744101	0.987399	0.230217	0.703169	0.923815	0.998962	0.00937222	0.0199662	0.252583	0.433496	0.0258576	0.082405	0.0429586	0.833663	0.817522	0.645782	0.0528023	0.037336	0.394238	0.189848	0.135416	0.956207	-5.39274
COc1cc2nccc(Oc3ccc(C(=O)Nc4ccccn4)cc3)c2cc1NC(=O)C#CCCN1CCOCC1	CHEMBL4755977	41	nM	7.38722	551.217	8	2	4.3472	TRUE	551.603	4.3472	8	2	3	0.310893	0	114.91	0.47979	0.383716	0.849014	0.0488813	0.365838	0.325338	0.52484	0.117932	0.0822652	0.720175	0.702024	0.329525	0.759023	0.981051	0.983989	0.00837351	0.0137738	0.541743	0.118426	0.0215716	0.0654245	0.0697913	0.825961	0.884481	0.703596	0.126266	0.18416	0.640359	0.525958	0.201017	0.900025	-4.80347
Fc1cccc(COc2ccc(Nc3ncnn4ccc(CN5CCCNCC5)c34)cc2Cl)c1	CHEMBL247709	41	nM	7.38722	480.184	7	2	4.6397	TRUE	480.975	4.6397	7	2	4	0.401499	0	66.72	0.471577	0.826023	0.86573	0.68486	0.775413	0.242239	0.522048	0.515212	0.888459	0.783554	0.965105	0.396282	0.812444	0.853147	0.999548	0.0128498	0.0131532	0.524035	0.350605	0.0326006	0.0828391	0.0431424	0.836524	0.956066	0.701499	0.0259159	0.112072	0.37152	0.186865	0.276618	0.977424	-5.48291
O=C(NO)[C@H]1C[C@H](OC(=O)N2CCCC2)CN[C@@H]1C(=O)N1CCC(c2ccccc2)CC1	CHEMBL584120	42	nM	7.37675	444.237	6	3	1.4771	TRUE	444.532	1.4771	6	3	4	0.47922	3	111.21	0.522006	0.539635	0.652191	0.00769522	0.122843	0.101159	0.045094	0.14794	0.0497702	0.711996	0.245484	0.0560373	0.633628	0.362226	0.893247	0.0140077	0.0427627	0.0268131	0.00824496	0.0308859	0.166015	0.00803448	0.662279	0.132832	0.26963	0.0921002	0.019088	0.0133302	0.217365	0.244401	0.457306	-5.43398
C=CC(=O)N1CCC[C@H]1C(=O)Nc1cc2c(Nc3cccc(Cl)c3F)ncnc2cc1OCCOC	CHEMBL571040	42	nM	7.37675	513.158	7	2	4.3066	TRUE	513.957	4.3066	7	2	3	0.324278	1	105.68	0.322695	0.64823	0.780843	0.0843632	0.399115	0.15383	0.413051	0.0806691	0.0704527	0.79566	0.880659	0.130201	0.407702	0.972261	0.997837	0.0162215	0.0145944	0.416713	0.259653	0.026021	0.0637072	0.0841767	0.863471	0.86518	0.763348	0.117252	0.0876074	0.249407	0.417071	0.143516	0.862731	-4.9445
Nc1ncnc(Nc2ccc3c(cnn3Cc3cccc(F)c3)c2)c1/C=N/O	CHEMBL256295	42	nM	7.37675	377.14	8	3	3.1476	TRUE	377.383	3.1476	8	3	4	0.279622	0	114.24	0.584545	0.691708	0.897709	0.667839	0.830171	0.271142	0.420887	0.202798	0.299487	0.551157	0.965924	0.359196	0.335202	0.93912	0.999184	0.0128712	0.0412152	0.75933	0.483487	0.0426044	0.177062	0.041938	0.786	0.49581	0.54435	0.2275	0.0566717	0.337264	0.140729	0.232315	0.886907	-5.41793
CCc1cccc(NC(=O)CSc2nc3cc4ccccc4cc3c(=O)n2-c2ccc(S(N)(=O)=O)cc2)c1	CHEMBL5281270	42	nM	7.37675	544.124	7	2	4.4795	TRUE	544.658	4.4795	7	2	3	0.176889	0	124.15	0.133042	0.492932	0.788645	0.396424	0.595356	0.650701	0.740969	0.118822	0.119763	0.488044	0.772369	0.590852	0.229159	0.975071	0.97578	0.0603952	0.0960236	0.0503853	0.126279	0.0240084	0.113485	0.197811	0.494732	0.884876	0.395671	0.0490237	0.0414719	0.426896	0.0874395	0.170344	0.792914	-5.70738
CCOCCOc1cc2ncnc(Nc3ccc(F)c(Cl)c3)c2cc1NC(=O)/C=C/CN(C)C	CHEMBL4473875	42.11	nM	7.37561	487.179	7	2	4.6375	TRUE	487.963	4.6375	7	2	4	0.300707	0	88.61	0.565194	0.729749	0.823793	0.153068	0.37065	0.211553	0.137119	0.282022	0.312554	0.813196	0.724547	0.451107	0.654842	0.897468	0.981107	0.0238217	0.0221644	0.566318	0.236309	0.047116	0.0646819	0.0407451	0.857214	0.868925	0.549457	0.0811349	0.106279	0.299179	0.287776	0.216661	0.884866	-5.03352
C[C@@H](Oc1cccc2ncnc(Nc3ccc4c(cnn4Cc4nccs4)c3)c12)C(=O)N1CCOCC1	CHEMBL257411	43	nM	7.36653	515.174	10	1	3.854	TRUE	515.599	3.854	10	1	3	0.348322	1	107.29	0.289369	0.42918	0.905912	0.149341	0.574698	0.402911	0.577936	0.142273	0.0409311	0.598754	0.955641	0.242676	0.443702	0.985829	0.998764	0.00470965	0.0115693	0.331593	0.192977	0.013008	0.10092	0.0813797	0.816313	0.740176	0.732137	0.0510701	0.0430865	0.357764	0.222	0.138469	0.858235	-5.17308
CC1(N)CCN(Cc2ccn3ncnc(Nc4ccc5c(cnn5Cc5cccc(F)c5)c4)c23)CC1	CHEMBL393264	43	nM	7.36653	484.25	8	2	4.3232	TRUE	484.583	4.3232	8	2	4	0.373122	0	89.3	0.25963	0.926499	0.834444	0.140805	0.234463	0.091439	0.174848	0.500341	0.807895	0.705754	0.854545	0.30092	0.881743	0.568965	0.998963	0.0106431	0.0148217	0.239872	0.163943	0.013724	0.0482246	0.00294761	0.834871	0.826507	0.33952	0.0161253	0.0195523	0.0838316	0.0216105	0.222483	0.985757	-6.01683
C[C@H](Oc1cccc2ncnc(Nc3ccc(OCc4ccccn4)c(Cl)c3)c12)C(=O)N(C)C	CHEMBL255968	43	nM	7.36653	477.157	7	1	4.8563	TRUE	477.952	4.8563	7	1	4	0.387424	1	89.47	0.429025	0.479123	0.927104	0.30441	0.729971	0.448483	0.384148	0.152147	0.223647	0.81131	0.923645	0.354263	0.446024	0.951669	0.998462	0.00632898	0.0136726	0.522265	0.364099	0.0159817	0.0757778	0.0598422	0.949983	0.888524	0.690885	0.0329968	0.0733887	0.332639	0.100798	0.145549	0.839046	-5.16432
COc1cn2ncnc(Nc3ccc4c(cnn4Cc4cccc(F)c4)c3)c2c1CN1CCC(N)CC1	CHEMBL391181	43	nM	7.36653	500.245	9	2	3.9417	TRUE	500.582	3.9417	9	2	3	0.349267	0	98.53	0.33825	0.853362	0.88254	0.197342	0.307198	0.103383	0.228447	0.532973	0.649467	0.784176	0.899455	0.237059	0.827997	0.693316	0.999535	0.0112301	0.0148231	0.421292	0.159248	0.014036	0.0533844	0.00657474	0.842519	0.889579	0.440772	0.0529803	0.0336174	0.135426	0.0744607	0.140577	0.982495	-5.63875
Fc1cccc(COc2ccc(Nc3ncnc4sc(-c5cccs5)cc34)cc2Cl)c1	CHEMBL506414	43	nM	7.36653	467.033	6	1	7.5349	TRUE	467.978	7.5349	6	1	3	0.280029	0	47.04	0.49949	0.463077	0.838218	0.605936	0.809017	0.419609	0.607948	0.0963005	0.21721	0.645392	0.595711	0.448367	0.0932738	0.969839	0.999544	0.0206575	0.0288639	0.83667	0.43378	0.0681643	0.354382	0.287432	0.68774	0.93857	0.894023	0.186823	0.584362	0.759198	0.542962	0.280903	0.773236	-5.09483
O=C(CCCCCCOc1ccc2ncnc(Nc3ccc(F)c(Cl)c3)c2c1)NO	CHEMBL604094	43.5	nM	7.36151	432.136	6	3	5.0006	TRUE	432.883	5.0006	6	3	3	0.236813	0	96.37	0.866063	0.678951	0.880573	0.548932	0.863652	0.286758	0.696984	0.231842	0.501198	0.847631	0.932388	0.368152	0.651592	0.913379	0.999401	0.00935321	0.0187304	0.815377	0.42513	0.0827868	0.193175	0.093907	0.835295	0.874103	0.839553	0.151874	0.171257	0.572705	0.662844	0.268654	0.873649	-5.34093
CO/N=C/c1c(N)ncnc1Nc1ccc2c(cnn2Cc2cccc(C#N)c2)c1	CHEMBL255865	44	nM	7.35655	398.16	9	2	3.05238	TRUE	398.43	3.05238	9	2	4	0.377321	0	127.03	0.48167	0.572434	0.868652	0.283427	0.497292	0.207304	0.246872	0.207248	0.126154	0.670935	0.90292	0.346516	0.369427	0.924071	0.995903	0.0147399	0.0416112	0.662118	0.417224	0.044149	0.0887661	0.0328412	0.799705	0.612936	0.366016	0.188121	0.0500996	0.276128	0.279674	0.209192	0.925178	-5.45119
CCC1=C2C(Nc3ccc4c(cnn4Cc4ccccc4)c3)=NC=NC2N=C1NC(=O)OCCn1ccnc1	CHEMBL566337	44	nM	7.35655	521.229	10	2	4.0046	TRUE	521.585	4.0046	10	2	3	0.380525	1	123.08	0.268389	0.73976	0.819861	0.743527	0.985166	0.424917	0.991819	0.132037	0.73561	0.633777	0.988648	0.100902	0.361918	0.941364	0.999912	0.00147725	0.00401696	0.6598	0.458915	0.00921136	0.0467821	0.118705	0.827468	0.97329	0.782931	0.0562805	0.143963	0.730106	0.275828	0.226363	0.970232	-6.0031
Nc1cccc(C#Cc2cncnc2Nc2ccc(OCc3cccc(F)c3)c(Cl)c2)c1	CHEMBL205235	44	nM	7.35655	444.115	5	2	5.5737	TRUE	444.897	5.5737	5	2	3	0.310586	0	73.06	0.535876	0.363669	0.856551	0.603273	0.978972	0.242837	0.878444	0.0971807	0.611782	0.738242	0.976333	0.356335	0.10782	0.940657	0.999879	0.00244544	0.008046	0.845984	0.761565	0.0423562	0.158378	0.169864	0.701085	0.890705	0.767605	0.0342077	0.5019	0.734453	0.283248	0.235552	0.909356	-5.26158
COc1ccccc1Cc1nc2ccc(-c3nn([C@H]4CC[C@H](N5CCNCC5)CC4)c4ncnc(N)c34)cc2[nH]1	CHEMBL455208	44	nM	7.35655	537.296	9	3	3.9401	TRUE	537.672	3.9401	9	3	3	0.297721	0	122.8	0.356219	0.730896	0.792628	0.119759	0.479142	0.207101	0.262007	0.383048	0.509284	0.794643	0.864681	0.131386	0.651409	0.803203	0.997941	0.00404253	0.0115643	0.519773	0.311783	0.0210409	0.0486629	0.00615833	0.736886	0.620756	0.361002	0.0609756	0.0474962	0.384864	0.237326	0.261814	0.989182	-5.8398
CN1C[C@@H](OC(=O)N2CCC2)C[C@H](C(=O)NO)[C@H]1C(=O)N1CCN(c2ccccc2)CC1	CHEMBL584334	44.5	nM	7.35164	445.233	7	2	0.3718	TRUE	445.52	0.3718	7	2	4	0.509634	3	105.66	0.331986	0.679719	0.536577	0.0023549	0.132812	0.207843	0.0176894	0.126442	0.0179804	0.778866	0.110643	0.0693667	0.730786	0.501245	0.906756	0.00858599	0.0484263	0.0155881	0.00391542	0.00769105	0.059255	0.00862278	0.807664	0.0755128	0.273348	0.0303457	0.00705202	0.00540491	0.112029	0.206206	0.466221	-5.20946
COc1cc2ncnc(Nc3ccc(F)c(Cl)c3)c2cc1NC(=O)/C=C/CN1CCCCC1.O	CHEMBL2105719	46	nM	7.33724	487.179	6	2	4.3304	TRUE	487.963	4.3304	6	2	4	0.479706	0	110.88	0.482234	0.846647	0.800568	0.303801	0.548241	0.133917	0.339642	0.338578	0.599391	0.751972	0.769228	0.222799	0.822536	0.885761	0.99709	0.0266425	0.0123188	0.65217	0.193815	0.073099	0.142428	0.0606347	0.883458	0.853134	0.72359	0.210677	0.248854	0.399305	0.514235	0.241633	0.898076	-5.05042
CCN(CC)CC#CC(=O)Nc1ccc2ncnc(Nc3ccc(F)c(Cl)c3)c2c1	CHEMBL373207	46	nM	7.33724	425.142	5	2	4.4496	TRUE	425.895	4.4496	5	2	4	0.570839	0	70.15	0.718938	0.892202	0.818836	0.690632	0.642564	0.313681	0.401766	0.36462	0.736228	0.741968	0.811309	0.534354	0.78712	0.900217	0.996131	0.040669	0.019167	0.726174	0.337311	0.0517144	0.12501	0.129912	0.905246	0.86591	0.644558	0.165693	0.274157	0.494909	0.401785	0.449313	0.913716	-4.90511
COc1cc2ncnc(Nc3ccc(F)c(Cl)c3)c2cc1NC(=O)/C=C/CN1CCCCC1	CHEMBL2110732	46	nM	7.33724	469.168	6	2	5.1551	TRUE	469.948	5.1551	6	2	3	0.465445	0	79.38	0.506511	0.882453	0.823045	0.360466	0.572946	0.150166	0.369509	0.367816	0.587902	0.770317	0.794677	0.243268	0.808312	0.893508	0.998083	0.0329933	0.0132821	0.709643	0.217984	0.070406	0.149777	0.0730088	0.918835	0.893595	0.76984	0.221662	0.281848	0.436885	0.526094	0.26176	0.897246	-4.96613
OCCNCc1ccn2ncnc(Nc3ccc4c(cnn4Cc4cccc(F)c4)c3)c12	CHEMBL391321	47	nM	7.3279	431.187	8	3	3.0919	TRUE	431.475	3.0919	8	3	4	0.327165	0	92.3	0.261501	0.540991	0.768527	0.349648	0.624375	0.262633	0.383072	0.326121	0.598301	0.660131	0.95211	0.44311	0.543163	0.876305	0.998197	0.0161952	0.0325439	0.455398	0.250005	0.00773204	0.0579931	0.0167358	0.65767	0.79828	0.356208	0.0195796	0.0195544	0.32508	0.0676554	0.118664	0.976246	-5.77826
OCc1ccc(C#Cc2cncnc2Nc2ccc(OCc3cccc(F)c3)c(Cl)c2)o1	CHEMBL204467	47	nM	7.3279	449.094	6	2	5.0768	TRUE	449.869	5.0768	6	2	3	0.399618	0	80.41	0.133525	0.2169	0.817714	0.762863	0.96633	0.317094	0.926151	0.0705837	0.52387	0.673194	0.948166	0.186584	0.0362893	0.936206	0.999877	0.00379563	0.00776402	0.657664	0.763793	0.0161973	0.111216	0.250652	0.820414	0.954401	0.756075	0.023228	0.566914	0.868794	0.258162	0.147798	0.894593	-5.16205
Cc1cc(Nc2ncnc3cnc(N(C)C)cc23)ccc1Oc1ccc(C(=O)NCC(C)(C)C)cc1	CHEMBL228926	48	nM	7.31876	484.259	7	2	5.71102	TRUE	484.604	5.71102	7	2	3	0.34698	0	92.27	0.591162	0.360693	0.899258	0.127992	0.465616	0.374517	0.446648	0.267298	0.101116	0.86	0.494936	0.6057	0.463705	0.8838	0.991939	0.0123264	0.017796	0.641031	0.294056	0.0380803	0.122978	0.0408489	0.895569	0.940516	0.707699	0.197452	0.241343	0.757252	0.283206	0.169713	0.927512	-5.22257
COc1cc2c(Nc3ccc(Br)c(Cl)c3)ncnc2cc1O[C@H]1CO[C@H]2[C@@H]1OC[C@@H]2S(C)(=O)=O	CHEMBL3896067	50	nM	7.30103	569.002	9	1	3.7561	TRUE	570.849	3.7561	9	1	3	0.473795	4	108.87	0.353641	0.758863	0.906963	0.339366	0.505074	0.195354	0.267531	0.150194	0.08695	0.763005	0.894792	0.169588	0.377125	0.970975	0.997669	0.0142954	0.0279872	0.377549	0.398618	0.0320902	0.0742976	0.18195	0.840257	0.651343	0.804972	0.0915782	0.17079	0.297192	0.426332	0.161277	0.86383	-4.95997
COc1cc2c(Nc3ccc(Br)c(Cl)c3)ncnc2cc1O[C@H]1CO[C@H]2[C@@H]1OC[C@@H]2OC	CHEMBL3910031	50	nM	7.30103	521.035	8	1	4.3579	TRUE	522.783	4.3579	8	1	3	0.511345	4	83.96	0.415792	0.666747	0.930574	0.295031	0.416454	0.120563	0.21063	0.137088	0.0611353	0.728667	0.597988	0.145362	0.321948	0.968666	0.997307	0.0198843	0.0335221	0.657329	0.552229	0.0338443	0.0969269	0.126056	0.905232	0.662389	0.819921	0.155315	0.188642	0.404465	0.532093	0.295911	0.86484	-4.99612
CCO[C@H]1CO[C@H]2[C@@H]1OC[C@@H]2Oc1cc2ncnc(Nc3ccc(Br)c(Cl)c3)c2cc1OC	CHEMBL3907230	50	nM	7.30103	535.051	8	1	4.748	TRUE	536.81	4.748	8	1	3	0.463274	4	83.96	0.478886	0.685108	0.925862	0.314546	0.494773	0.109372	0.289603	0.144974	0.0883822	0.758611	0.668763	0.14696	0.348386	0.957531	0.998257	0.0192724	0.030853	0.674377	0.594756	0.0378029	0.109156	0.139294	0.905313	0.767461	0.851312	0.153397	0.239937	0.461466	0.542017	0.294634	0.877726	-4.99124
COc1cc2c(Nc3ccc(Br)c(Cl)c3)ncnc2cc1O[C@H]1CO[C@H]2[C@@H]1OC[C@@H]2OC(F)F	CHEMBL3921689	50	nM	7.30103	557.016	8	1	4.9507	TRUE	558.763	4.9507	8	1	3	0.43621	4	83.96	0.481791	0.765122	0.937366	0.307545	0.430567	0.110844	0.351129	0.12134	0.0506725	0.593788	0.769913	0.181849	0.5236	0.968718	0.998636	0.0199585	0.040683	0.648432	0.632352	0.0324673	0.096123	0.251757	0.89345	0.737211	0.894138	0.204846	0.11265	0.743889	0.652935	0.188584	0.90824	-5.04274
COc1cc2c(Nc3ccc(F)c(Cl)c3F)ncnc2cc1OC[C@@H]1CN2CCC[C@H]2CO1	CHEMBL3922278	50	nM	7.30103	476.143	7	1	4.5556	TRUE	476.911	4.5556	7	1	4	0.523076	2	68.74	0.687237	0.778111	0.951841	0.148244	0.1456	0.108214	0.10096	0.195154	0.106887	0.664449	0.853628	0.211131	0.718569	0.954662	0.998911	0.0457626	0.0473009	0.635773	0.591839	0.0608351	0.0774314	0.0876744	0.870368	0.714638	0.6282	0.203514	0.0759805	0.486988	0.506052	0.186286	0.913517	-4.62837
COc1cc2c(Nc3ccc(Br)c(Cl)c3)ncnc2cc1O[C@H]1CO[C@@H]2CCO[C@H]12	CHEMBL3932115	50	nM	7.30103	491.025	7	1	4.733	TRUE	492.757	4.733	7	1	4	0.551603	3	74.73	0.520648	0.752241	0.927695	0.663197	0.515435	0.123085	0.267911	0.187748	0.135082	0.695123	0.728364	0.0938908	0.339765	0.959933	0.999436	0.0405998	0.0451496	0.794311	0.705357	0.0761464	0.190715	0.191388	0.929137	0.704249	0.872842	0.257818	0.284169	0.593363	0.639185	0.313264	0.850637	-4.91107
COc1cc2c(Nc3ccc(Cl)c(Cl)c3)ncnc2cc1OCc1nc2c(s1)CNCC2	CHEMBL3945353	50	nM	7.30103	487.064	8	2	5.37	TRUE	488.4	5.37	8	2	3	0.377767	0	81.19	0.336535	0.57422	0.906378	0.865794	0.94091	0.224111	0.689997	0.224717	0.370308	0.700228	0.963472	0.216622	0.161339	0.95997	0.99975	0.00706115	0.0144403	0.891654	0.442011	0.022178	0.112127	0.128262	0.880444	0.925375	0.808903	0.152567	0.447119	0.606672	0.373742	0.215751	0.838447	-5.19259
COc1cc2c(Nc3ccc(Cl)c(Cl)c3)ncnc2cc1OCC1CC1	CHEMBL3928696	50	nM	7.30103	389.07	5	1	5.4776	TRUE	390.27	5.4776	5	1	3	0.604316	0	56.27	0.428022	0.893583	0.973465	0.98223	0.633552	0.351653	0.181135	0.388935	0.324482	0.579698	0.825846	0.134624	0.0831202	0.925345	0.999988	0.0302618	0.0344665	0.947672	0.503555	0.0498466	0.208004	0.0773742	0.957919	0.652031	0.820826	0.555923	0.341911	0.809088	0.466318	0.23989	0.69667	-4.54598
COc1cc2c(Nc3ccc(Br)c(Cl)c3)ncnc2cc1O[C@@H]1CO[C@H]2[C@@H]1OC[C@@H]2O	CHEMBL3945028	50	nM	7.30103	507.02	8	2	3.7038	TRUE	508.756	3.7038	8	2	3	0.538705	4	94.96	0.335376	0.497783	0.883866	0.27455	0.26345	0.128	0.141951	0.0836191	0.0617884	0.567576	0.414055	0.0927728	0.37151	0.968963	0.997482	0.0326768	0.0469808	0.697612	0.545799	0.0247443	0.117511	0.109942	0.853007	0.508344	0.722733	0.130146	0.110301	0.521816	0.621483	0.189701	0.83216	-5.12679
COc1cc2c(Nc3ccc(Cl)c(Cl)c3)ncnc2cc1O[C@@H]1C[C@H]2OC[C@H](OC)[C@H]2O1	CHEMBL3919145	50	nM	7.30103	477.086	8	1	4.5964	TRUE	478.332	4.5964	8	1	4	0.550836	4	83.96	0.581837	0.68224	0.947483	0.389334	0.451186	0.0893731	0.256865	0.109565	0.0595355	0.689055	0.691285	0.118044	0.301786	0.975117	0.999034	0.0249241	0.0332759	0.792957	0.716936	0.0615253	0.152035	0.134333	0.937092	0.622369	0.876514	0.22922	0.173864	0.612231	0.590396	0.305608	0.841343	-4.96794
O=C(CCl)Nc1ccc2ncnc(Nc3cc(Cl)c(Cl)cc3F)c2c1	CHEMBL275762	50	nM	7.30103	397.99	4	2	4.9966	TRUE	399.64	4.9966	4	2	4	0.478611	0	66.91	0.675115	0.803639	0.905534	0.910862	0.736198	0.259827	0.428829	0.146803	0.411149	0.674573	0.902621	0.34175	0.236825	0.981097	0.999664	0.0524701	0.0310843	0.940295	0.599963	0.11247	0.265912	0.21773	0.879424	0.496845	0.917545	0.474679	0.464512	0.827977	0.792012	0.405347	0.62056	-4.71889
CN(C)C/C=C/C(=O)Nc1ccc2ncnc(Nc3cc(Cl)c(Cl)cc3F)c2c1	CHEMBL190094	50	nM	7.30103	433.087	5	2	4.8756	TRUE	434.302	4.8756	5	2	4	0.427838	0	70.15	0.648534	0.864158	0.872989	0.472808	0.458392	0.245717	0.108285	0.214346	0.508867	0.727537	0.763513	0.469584	0.750019	0.941652	0.992735	0.0738213	0.0431274	0.660592	0.300011	0.0518569	0.0904227	0.0604131	0.872312	0.696572	0.5734	0.167102	0.13922	0.4059	0.418359	0.284933	0.756713	-4.91671
COc1cc2c(Nc3ccc(Cl)c(Cl)c3)ncnc2cc1OC[C@@H]1O[C@@H](OC)[C@@H](O)[C@H](O)[C@H]1O	CHEMBL3949434	50	nM	7.30103	511.091	10	4	2.5216	TRUE	512.346	2.5216	10	4	3	0.374093	5	135.42	0.271344	0.333287	0.853952	0.0708782	0.176298	0.14813	0.0889756	0.0641327	0.0502297	0.509084	0.196709	0.123272	0.418275	0.955948	0.963963	0.0121038	0.0240494	0.566381	0.29868	0.0180739	0.0673924	0.0292263	0.681132	0.413782	0.418487	0.0595983	0.0352664	0.237186	0.347538	0.139327	0.83429	-5.50059
COc1cc2c(Nc3ccc(Br)c(Cl)c3)ncnc2cc1O[C@@H]1C[C@H]2OCC3(OCCO3)[C@H]2O1	CHEMBL3964605	50	nM	7.30103	549.03	9	1	4.4336	TRUE	550.793	4.4336	9	1	3	0.495006	3	93.19	0.561835	0.794325	0.950175	0.322039	0.499043	0.0657076	0.347993	0.101405	0.0549474	0.755957	0.745707	0.111812	0.27402	0.976015	0.999492	0.0135999	0.0252991	0.736979	0.644339	0.0238991	0.105048	0.101487	0.943738	0.617489	0.895396	0.118495	0.163519	0.506782	0.477324	0.290822	0.797971	-4.95491
COc1cc2c(Nc3ccc(Cl)c(Cl)c3)ncnc2cc1O[C@H]1CO[C@H]2[C@@H]1OC[C@@H]2OC	CHEMBL3964556	50	nM	7.30103	477.086	8	1	4.2488	TRUE	478.332	4.2488	8	1	4	0.563357	4	83.96	0.402986	0.623642	0.93675	0.273783	0.372106	0.130864	0.189951	0.121747	0.0428382	0.697603	0.574927	0.153491	0.297311	0.973411	0.996223	0.0191991	0.033212	0.656924	0.58237	0.0360837	0.0956018	0.131799	0.90761	0.593266	0.805879	0.186222	0.165219	0.422034	0.520854	0.319566	0.858474	-4.96834
CCN1CCOC(COc2cc3ncnc(Nc4ccc(Cl)c(Cl)c4)c3cc2OC)C1	CHEMBL3936151	50	nM	7.30103	462.123	7	1	4.7883	TRUE	463.365	4.7883	7	1	4	0.540582	1	68.74	0.698201	0.863452	0.936573	0.68338	0.487831	0.177044	0.0969473	0.434643	0.475447	0.681692	0.927458	0.223732	0.747746	0.931726	0.999468	0.0151335	0.0176012	0.813064	0.495392	0.0464101	0.071121	0.049841	0.943252	0.846849	0.664608	0.157628	0.142001	0.389138	0.337504	0.334204	0.941945	-4.70425
COc1cc2c(Nc3ccc(Br)c(Cl)c3)ncnc2cc1O[C@H]1CO[C@H]2[C@@H]1OC[C@@H]2O	CHEMBL3893363	50	nM	7.30103	507.02	8	2	3.7038	TRUE	508.756	3.7038	8	2	3	0.538705	4	94.96	0.336181	0.515307	0.894332	0.291591	0.279355	0.131063	0.151621	0.0914359	0.0648969	0.566112	0.454547	0.0991451	0.376288	0.970178	0.99794	0.0272145	0.0431131	0.710377	0.536639	0.0211009	0.107075	0.0966826	0.8554	0.528112	0.724949	0.119005	0.10778	0.50638	0.592011	0.189147	0.83853	-5.11086
COc1cc2c(Nc3ccc(Br)c(Cl)c3F)ncnc2cc1OC[C@@H]1CN(C)CC(=O)N1	CHEMBL3935851	50	nM	7.30103	523.042	7	2	3.746	TRUE	524.778	3.746	7	2	3	0.47498	1	88.61	0.200193	0.707051	0.92706	0.150606	0.352336	0.418538	0.266436	0.235769	0.0613476	0.826249	0.94134	0.158896	0.629285	0.983366	0.999169	0.00965555	0.0197002	0.453548	0.105949	0.0154679	0.0378239	0.0564732	0.941473	0.68616	0.610175	0.0504227	0.0263989	0.132781	0.239244	0.0928999	0.834684	-4.87502
CCN1CCCOC(COc2cc3ncnc(Nc4ccc(Cl)c(Cl)c4)c3cc2OC)C1	CHEMBL3983938	50	nM	7.30103	476.138	7	1	5.1784	TRUE	477.392	5.1784	7	1	3	0.503141	1	68.74	0.687221	0.860836	0.926341	0.685063	0.435126	0.178266	0.0890503	0.506781	0.604773	0.751119	0.876628	0.229315	0.730111	0.896882	0.999372	0.0131177	0.0169808	0.763887	0.477108	0.0392357	0.0817231	0.0457505	0.946094	0.910219	0.670123	0.11976	0.166475	0.365964	0.293442	0.32491	0.952877	-4.96502
COc1cc2c(Nc3ccc(Cl)c(Cl)c3)ncnc2cc1OC[C@@H]1CN2CCC[C@H]2CO1	CHEMBL3928883	50	nM	7.30103	474.123	7	1	4.9308	TRUE	475.376	4.9308	7	1	4	0.54232	2	68.74	0.71322	0.78627	0.934006	0.418398	0.231152	0.105199	0.0737187	0.306931	0.294902	0.67719	0.820665	0.174477	0.669346	0.914558	0.998918	0.0367212	0.0432818	0.801351	0.621725	0.0845514	0.130313	0.0619425	0.907021	0.807734	0.723933	0.217242	0.189749	0.567566	0.54775	0.325631	0.936356	-4.81771
CCCN1CCCOC(COc2cc3ncnc(Nc4ccc(Cl)c(Cl)c4)c3cc2OC)C1	CHEMBL3914599	50	nM	7.30103	490.154	7	1	5.5685	TRUE	491.419	5.5685	7	1	3	0.442039	1	68.74	0.602431	0.850783	0.898045	0.611064	0.517859	0.129817	0.208931	0.468869	0.658654	0.768135	0.8528	0.243018	0.67836	0.845413	0.999171	0.0150341	0.0166096	0.776783	0.532484	0.0513574	0.102464	0.0564154	0.921633	0.939835	0.750234	0.120415	0.281892	0.470129	0.355395	0.336108	0.960689	-5.07044
COc1cc2c(Nc3ccc(Cl)c(Cl)c3Cl)ncnc2cc1OCC1CN(C)CCO1	CHEMBL3944791	50	nM	7.30103	482.068	7	1	5.0516	TRUE	483.783	5.0516	7	1	3	0.491939	1	68.74	0.540279	0.833811	0.945494	0.505767	0.38608	0.180754	0.110458	0.3536	0.182326	0.686977	0.849674	0.235106	0.60296	0.961475	0.998997	0.0117545	0.0170147	0.785656	0.492693	0.0294217	0.0462639	0.0605241	0.941642	0.824998	0.701513	0.138388	0.1357	0.418792	0.331688	0.31114	0.91486	-4.66114
COc1cc2c(Nc3ccc(Br)c(Cl)c3F)ncnc2cc1O[C@@H]1C[C@H]2OC[C@H](OC)[C@H]2O1	CHEMBL3961005	50	nM	7.30103	539.026	8	1	4.8446	TRUE	540.773	4.8446	8	1	3	0.4447	4	83.96	0.498799	0.748804	0.952402	0.15921	0.345454	0.109939	0.318172	0.0918065	0.0285239	0.749701	0.772103	0.129383	0.385425	0.98399	0.999309	0.0170852	0.0273095	0.68608	0.630665	0.0334116	0.0719939	0.138285	0.938371	0.7065	0.841976	0.161778	0.102063	0.490903	0.514392	0.165778	0.862576	-4.92804
CCCCN1CCOC(COc2cc3ncnc(Nc4ccc(Cl)c(Cl)c4)c3cc2OC)C1	CHEMBL3919051	50	nM	7.30103	490.154	7	1	5.5685	TRUE	491.419	5.5685	7	1	3	0.419901	1	68.74	0.593261	0.848219	0.893002	0.54056	0.654312	0.124881	0.313867	0.39463	0.629367	0.711051	0.921964	0.248291	0.708399	0.87289	0.99927	0.012844	0.0151125	0.837295	0.572007	0.0553588	0.0854766	0.0627688	0.911235	0.952509	0.773956	0.127992	0.299838	0.560769	0.356841	0.34604	0.957901	-4.83452
COc1cc2c(Nc3ccc(C)c(Br)c3)ncnc2cc1OCC1CN(C)CCO1	CHEMBL3916225	50	nM	7.30103	472.111	7	1	4.16232	TRUE	473.371	4.16232	7	1	4	0.576759	1	68.74	0.72855	0.848028	0.967184	0.431107	0.34498	0.239044	0.0459109	0.421187	0.241454	0.753951	0.921513	0.222903	0.644038	0.948124	0.999607	0.0107088	0.0164324	0.72302	0.338852	0.0274745	0.0664387	0.0384392	0.941638	0.863596	0.615792	0.132351	0.0766582	0.296842	0.252305	0.22807	0.943462	-4.78279
COc1cc2c(Nc3ccc(F)c(Cl)c3F)ncnc2cc1OC[C@@H]1CN2CCOC[C@H]2CO1	CHEMBL3946242	50	nM	7.30103	492.138	8	1	3.792	TRUE	492.91	3.792	8	1	4	0.520755	2	77.97	0.667134	0.745731	0.955057	0.130181	0.17218	0.109597	0.132009	0.15147	0.0487367	0.669457	0.898255	0.172743	0.615242	0.976418	0.999043	0.0264583	0.0259373	0.597606	0.572439	0.0427454	0.0565271	0.10678	0.859599	0.614359	0.651484	0.175422	0.068162	0.399489	0.478275	0.188039	0.893567	-4.65594
COc1cc2c(Nc3cc(Cl)c(Cl)cc3F)ncnc2cc1OC[C@@H]1CN2CCOC[C@H]2CO1	CHEMBL3908311	50	nM	7.30103	508.108	8	1	4.3063	TRUE	509.365	4.3063	8	1	3	0.493239	2	77.97	0.686388	0.760821	0.958938	0.195465	0.204936	0.135695	0.163645	0.198951	0.0529872	0.724465	0.9229	0.195212	0.653066	0.974783	0.999207	0.0194741	0.0200865	0.672298	0.556078	0.0402935	0.0544636	0.114957	0.886546	0.757975	0.745231	0.196164	0.107339	0.485175	0.53752	0.224664	0.925705	-4.60724
COc1cc2c(Nc3ccc(Cl)c(Cl)c3F)ncnc2cc1O[C@@H]1C[C@H]2OC[C@H](OC)[C@H]2O1	CHEMBL3986404	50	nM	7.30103	495.076	8	1	4.7355	TRUE	496.322	4.7355	8	1	4	0.490664	4	83.96	0.503897	0.715676	0.953978	0.150481	0.330799	0.122958	0.307699	0.0836776	0.0222821	0.729393	0.76065	0.132429	0.366286	0.986425	0.999184	0.0170634	0.0260092	0.672191	0.658666	0.0374296	0.0702013	0.144321	0.935794	0.688667	0.837459	0.166674	0.0964953	0.493097	0.514787	0.183163	0.85153	-4.88275
COc1cc2c(Nc3cc(Cl)c(Cl)c(Cl)c3)ncnc2cc1OCC1CN(C)CCO1	CHEMBL3906715	50	nM	7.30103	482.068	7	1	5.0516	TRUE	483.783	5.0516	7	1	3	0.491939	1	68.74	0.473446	0.820572	0.949445	0.554464	0.39718	0.197725	0.121857	0.395265	0.1953	0.682866	0.841299	0.239392	0.596237	0.963258	0.998916	0.0131426	0.0193634	0.798056	0.481785	0.0305009	0.0468926	0.065552	0.94363	0.839328	0.697771	0.13863	0.139522	0.468231	0.349947	0.301017	0.91766	-4.64026
COc1cc2c(Nc3ccc(Cl)c(Cl)c3)ncnc2cc1OC1C[C@@H]2CN(C)C[C@@H]2C1	CHEMBL3920036	50	nM	7.30103	458.128	6	1	5.4078	TRUE	459.377	5.4078	6	1	3	0.55097	3	59.51	0.350503	0.8857	0.947422	0.535375	0.107356	0.209309	0.0366042	0.516905	0.364627	0.751474	0.757833	0.136247	0.513783	0.830351	0.999142	0.0382143	0.0311176	0.677625	0.359569	0.0410043	0.112674	0.0330377	0.909025	0.809049	0.649826	0.255527	0.214058	0.567955	0.414622	0.194372	0.932234	-5.01921
COc1cc2c(Nc3cc(Cl)c(Cl)cc3F)ncnc2cc1OCC1CN(C)CCO1	CHEMBL3968233	50	nM	7.30103	466.097	7	1	4.5373	TRUE	467.328	4.5373	7	1	4	0.534347	1	68.74	0.556926	0.809259	0.964838	0.332726	0.288379	0.268779	0.108798	0.3268	0.0785993	0.699605	0.930165	0.237512	0.691117	0.978943	0.999451	0.0126895	0.0154393	0.700594	0.409531	0.0323107	0.0368539	0.0767914	0.935573	0.77815	0.660519	0.120691	0.0610798	0.322002	0.313178	0.183372	0.900184	-4.47709
COc1cc2c(Nc3ccc(F)c(Cl)c3F)ncnc2cc1OCC1CN(C)C(C)(C)CO1	CHEMBL3895129	50	nM	7.30103	478.158	7	1	4.8016	TRUE	478.927	4.8016	7	1	4	0.510133	1	68.74	0.398683	0.79992	0.952461	0.128326	0.343525	0.208167	0.187532	0.192403	0.109725	0.73911	0.918161	0.245672	0.687647	0.955893	0.999008	0.0101162	0.0145065	0.567035	0.457583	0.0412807	0.0369761	0.0578989	0.936841	0.769189	0.586673	0.0866175	0.0499725	0.344437	0.200119	0.123166	0.884176	-4.43746
COc1cc2c(Nc3ccc(Cl)c(Cl)c3F)ncnc2cc1OC[C@H]1CN2CCOC[C@H]2CO1	CHEMBL3971781	50	nM	7.30103	508.108	8	1	4.3063	TRUE	509.365	4.3063	8	1	3	0.493239	2	77.97	0.69998	0.79868	0.960882	0.206321	0.207055	0.125643	0.15516	0.209223	0.0598326	0.715372	0.936276	0.183803	0.66976	0.97252	0.999373	0.0185261	0.0199866	0.685317	0.54311	0.0346241	0.050893	0.0936487	0.897422	0.754122	0.722644	0.167652	0.0995102	0.436655	0.473158	0.220377	0.925444	-4.61407
COc1cc2c(Nc3cc(Cl)c(Br)cc3F)ncnc2cc1OC[C@@H]1CN2CCOC[C@H]2CO1	CHEMBL3924147	50	nM	7.30103	552.058	8	1	4.4154	TRUE	553.816	4.4154	8	1	3	0.449916	2	77.97	0.662067	0.789778	0.958636	0.194853	0.226737	0.122473	0.163379	0.210651	0.0714781	0.74127	0.92405	0.18943	0.657909	0.971204	0.99932	0.0185225	0.0219268	0.698426	0.524921	0.0339206	0.0522558	0.0942485	0.897869	0.784502	0.739959	0.163218	0.112035	0.454917	0.509712	0.203689	0.924682	-4.66775
COc1cc2c(Nc3ccc(Br)c(Cl)c3)ncnc2cc1O[C@@H]1CO[C@H]2[C@@H]1OC[C@@H]2NC(F)(F)F	CHEMBL3958721	50	nM	7.30103	574.023	8	2	4.8209	TRUE	575.769	4.8209	8	2	3	0.4049	4	86.76	0.331032	0.710529	0.92786	0.342643	0.413891	0.108346	0.248426	0.1741	0.0991197	0.577644	0.797722	0.185319	0.633757	0.956416	0.998245	0.020833	0.0352267	0.59539	0.507284	0.0303804	0.0865097	0.178885	0.886409	0.722174	0.817091	0.15909	0.0938217	0.705862	0.609513	0.138669	0.926587	-5.16649
COc1cc2c(Nc3cc(Cl)c(Cl)cc3F)ncnc2cc1OC[C@@H]1CO[C@H]2[C@@H]1OC[C@@H]2OC	CHEMBL3931427	50	nM	7.30103	509.092	8	1	4.6355	TRUE	510.349	4.6355	8	1	3	0.460933	4	83.96	0.381361	0.639726	0.951145	0.129356	0.219612	0.185713	0.22626	0.119303	0.0156592	0.753843	0.752772	0.161363	0.393729	0.974249	0.998206	0.0242892	0.0379564	0.541905	0.556018	0.0402268	0.0666671	0.209819	0.887376	0.766913	0.779426	0.278371	0.110123	0.48992	0.547424	0.140959	0.886884	-4.85349
C=CC(=O)Nc1cccc(-c2c(-c3ccc(N4CCN(C)CC4)cc3)[nH]c3ncnc(OC)c23)c1	CHEMBL4776708	50	nM	7.30103	468.227	6	2	4.1768	TRUE	468.561	4.1768	6	2	4	0.413145	0	86.38	0.320757	0.511749	0.766257	0.375638	0.345782	0.392028	0.206435	0.347453	0.13483	0.749834	0.688975	0.194932	0.598095	0.974654	0.988401	0.0283108	0.023506	0.573101	0.161313	0.0394898	0.0683709	0.035014	0.776072	0.755912	0.595302	0.169805	0.132204	0.453358	0.638361	0.225627	0.907188	-4.98098
COc1cc2c(Nc3ccc(Br)c(Cl)c3)ncnc2cc1OCC1CN(C)CCO1	CHEMBL3945177	50	nM	7.30103	492.056	7	1	4.5073	TRUE	493.789	4.5073	7	1	4	0.54181	1	68.74	0.563803	0.8549	0.942863	0.625613	0.447092	0.175169	0.0780973	0.423159	0.330348	0.727729	0.893007	0.188709	0.654834	0.949044	0.999532	0.013796	0.0190161	0.782149	0.446384	0.0361914	0.0652532	0.0531232	0.945112	0.800051	0.668549	0.114352	0.129468	0.346588	0.32843	0.260436	0.913544	-4.70867
COc1cc2c(Nc3ccc(Br)c(C)c3)ncnc2cc1OCC1CN(C)CCO1	CHEMBL3934095	50	nM	7.30103	472.111	7	1	4.16232	TRUE	473.371	4.16232	7	1	4	0.576759	1	68.74	0.738527	0.834163	0.971137	0.478439	0.31294	0.236074	0.0424843	0.421754	0.226026	0.772806	0.918804	0.252297	0.67103	0.952356	0.999593	0.014279	0.0181816	0.703843	0.332156	0.0275989	0.070399	0.0498188	0.94181	0.818362	0.652318	0.17038	0.078547	0.309758	0.335628	0.214972	0.944353	-4.77354
COc1cc2c(Nc3ccc(Cl)c(Cl)c3)ncnc2cc1OCC1CNCC(C)(C)O1	CHEMBL3914189	50	nM	7.30103	462.123	7	2	4.8346	TRUE	463.365	4.8346	7	2	4	0.542131	1	77.53	0.417049	0.710198	0.944323	0.505043	0.732847	0.135796	0.389685	0.269813	0.187063	0.724957	0.895516	0.208166	0.485421	0.936591	0.999769	0.0076812	0.0116249	0.860437	0.598899	0.0512802	0.0934762	0.0911035	0.929998	0.811548	0.790303	0.167789	0.248131	0.599558	0.37559	0.226502	0.896318	-4.89988
COc1cc2c(Nc3ccc(Cl)c(Cl)c3)ncnc2cc1OC[C@@H]1CO[C@H]2[C@@H]1OC[C@@H]2OC	CHEMBL3893416	50	nM	7.30103	491.101	8	1	4.4964	TRUE	492.359	4.4964	8	1	4	0.516623	4	83.96	0.425785	0.604663	0.940942	0.280652	0.307355	0.157169	0.188261	0.150842	0.0373836	0.760582	0.719656	0.140332	0.329733	0.958573	0.99816	0.0306599	0.0452058	0.691286	0.611994	0.0601854	0.123161	0.179064	0.90275	0.68805	0.81096	0.30756	0.191833	0.528239	0.573999	0.229826	0.884183	-5.04086
COc1cc2c(Nc3ccc(Br)c(Cl)c3)ncnc2cc1O[C@@H]1CO[C@H]2[C@@H]1OC[C@@H]2NS(C)(=O)=O	CHEMBL3943734	50	nM	7.30103	584.013	9	2	3.2607	TRUE	585.864	3.2607	9	2	3	0.430362	4	120.9	0.271907	0.625029	0.910344	0.435813	0.396375	0.164705	0.22194	0.151764	0.171897	0.723557	0.843131	0.127496	0.396951	0.977547	0.997687	0.0351312	0.0567324	0.301933	0.31102	0.037966	0.108298	0.157524	0.878917	0.489182	0.675926	0.0908255	0.0959057	0.282888	0.496355	0.160545	0.841478	-5.39103
COc1cc2c(Nc3ccc(Cl)c(Cl)c3)ncnc2cc1OCC1CN(C)CC(C)(C)O1	CHEMBL3928601	50	nM	7.30103	476.138	7	1	5.1768	TRUE	477.392	5.1768	7	1	3	0.525036	1	68.74	0.450554	0.79953	0.942279	0.264513	0.469273	0.169064	0.11024	0.331246	0.278051	0.790019	0.860529	0.244479	0.659847	0.908051	0.999193	0.0068713	0.0129988	0.743178	0.471578	0.0415007	0.0612684	0.0405787	0.954785	0.88543	0.688662	0.0971566	0.131226	0.46521	0.230792	0.214489	0.929045	-4.67131
COc1cc2c(Nc3ccc(Cl)c(Cl)c3F)ncnc2cc1OC[C@@H]1CN(C)CC(=O)N1	CHEMBL3933130	50	nM	7.30103	479.093	7	2	3.6369	TRUE	480.327	3.6369	7	2	4	0.521263	1	88.61	0.211461	0.671661	0.924988	0.14483	0.330981	0.432165	0.244072	0.223158	0.0484428	0.803536	0.939012	0.154001	0.618342	0.985523	0.999053	0.00968474	0.0182397	0.445876	0.119584	0.0188318	0.0376647	0.0600695	0.932718	0.661522	0.602069	0.0512828	0.0247985	0.120253	0.229073	0.1078	0.815465	-4.84521
COc1cc2c(Nc3ccc(Cl)c(Cl)c3F)ncnc2cc1OC[C@@H]1CN2CCC[C@H]2CO1	CHEMBL3959774	50	nM	7.30103	492.113	7	1	5.0699	TRUE	493.366	5.0699	7	1	3	0.481245	2	68.74	0.685301	0.801767	0.951037	0.177676	0.162632	0.123842	0.124346	0.239359	0.12084	0.710327	0.897136	0.214995	0.74413	0.948186	0.999151	0.0327148	0.0359063	0.70309	0.57844	0.0564737	0.0741354	0.0912903	0.8954	0.838172	0.713174	0.208595	0.113437	0.535957	0.52263	0.213412	0.935153	-4.61265
COc1cc2c(Nc3cc(Cl)c(Cl)cc3F)ncnc2cc1OC[C@@H]1CN2CCC[C@H]2CO1	CHEMBL3896122	50	nM	7.30103	492.113	7	1	5.0699	TRUE	493.366	5.0699	7	1	3	0.481245	2	68.74	0.70516	0.778316	0.95221	0.195119	0.154669	0.126787	0.118255	0.244647	0.116301	0.706113	0.884732	0.227011	0.750421	0.950439	0.999033	0.0352184	0.0347992	0.695898	0.583451	0.0601975	0.0762421	0.0978407	0.888743	0.837818	0.726542	0.22678	0.116458	0.558065	0.560433	0.226407	0.937341	-4.60694
COc1cc2c(Nc3cccc(Cl)c3F)ncnc2cc1O[C@H]1CO[C@H]2[C@@H]1OC[C@@H]2OC	CHEMBL3955359	50	nM	7.30103	461.115	8	1	3.7345	TRUE	461.877	3.7345	8	1	4	0.594136	4	83.96	0.368087	0.71185	0.957017	0.106628	0.266486	0.200923	0.176023	0.0958499	0.016117	0.70721	0.715348	0.130123	0.386593	0.984437	0.998435	0.0133053	0.0235607	0.485418	0.491539	0.0226854	0.0557031	0.119986	0.919492	0.526717	0.692581	0.12859	0.0473927	0.199074	0.37243	0.155389	0.857609	-4.89356
COc1cc2c(Nc3cc(Cl)c(Cl)cc3F)ncnc2cc1OC[C@H]1CN2CCOC[C@H]2CO1	CHEMBL3977450	50	nM	7.30103	508.108	8	1	4.3063	TRUE	509.365	4.3063	8	1	3	0.493239	2	77.97	0.720068	0.773885	0.962455	0.226415	0.192769	0.129199	0.14482	0.216937	0.057322	0.713516	0.929416	0.196394	0.677992	0.974022	0.999275	0.020008	0.019618	0.678026	0.550254	0.0379343	0.0527491	0.101933	0.890501	0.748536	0.737219	0.187953	0.101669	0.462633	0.515021	0.233626	0.928773	-4.60706
O=C(O[C@H]1CN[C@H](C#Cc2cc3ncnc(Nc4ccc5c(cnn5Cc5ccccc5)c4)c3s2)C1)N1CCOCC1	CHEMBL507821	50	nM	7.30103	579.205	10	2	4.3837	TRUE	579.686	4.3837	10	2	3	0.295675	2	106.43	0.360539	0.476942	0.728235	0.131436	0.569732	0.289849	0.685042	0.103659	0.111925	0.599044	0.920124	0.165614	0.569543	0.974385	0.994118	0.0106566	0.0168783	0.352385	0.22553	0.0427785	0.161642	0.210058	0.707516	0.887943	0.828693	0.234334	0.161027	0.757785	0.646133	0.292174	0.899384	-5.31016
COc1cc2c(Nc3ccc(Br)c(Cl)c3F)ncnc2cc1OC[C@H]1CN2CCOC[C@H]2CO1	CHEMBL3914441	50	nM	7.30103	552.058	8	1	4.4154	TRUE	553.816	4.4154	8	1	3	0.449916	2	77.97	0.683969	0.814261	0.96096	0.211923	0.209799	0.112165	0.155841	0.224295	0.0741762	0.737613	0.932875	0.186621	0.683581	0.968777	0.999439	0.0192447	0.0225966	0.69699	0.518644	0.0303843	0.0528967	0.0892678	0.904815	0.755278	0.729216	0.167019	0.102897	0.435486	0.477244	0.197228	0.930495	-4.6673
COc1cc2c(Nc3ccc(Cl)c(Cl)c3)ncnc2cc1OCC1CN(S(=O)(=O)CCCCl)CCO1	CHEMBL3923692	50	nM	7.30103	574.061	8	1	4.7271	TRUE	575.902	4.7271	8	1	3	0.346366	1	102.88	0.387564	0.786501	0.913823	0.540419	0.734728	0.200016	0.655475	0.189887	0.177651	0.762791	0.970806	0.251164	0.296409	0.970442	0.999834	0.0148287	0.0159615	0.567039	0.628755	0.0550703	0.110898	0.238552	0.916883	0.794	0.869388	0.106525	0.134473	0.718431	0.504635	0.178754	0.933042	-4.96867
COc1cc2c(Nc3ccc(Cl)c(Cl)c3)ncnc2cc1OC[C@H]1CN2CCC[C@@H]2CO1	CHEMBL3917220	50	nM	7.30103	474.123	7	1	4.9308	TRUE	475.376	4.9308	7	1	4	0.54232	2	68.74	0.700525	0.779559	0.929216	0.476701	0.253065	0.0983125	0.0792869	0.301633	0.374646	0.657845	0.85884	0.16214	0.673456	0.906598	0.999009	0.0379645	0.041436	0.812599	0.633766	0.0870421	0.13514	0.0577969	0.912252	0.803781	0.715795	0.210272	0.196104	0.567283	0.541568	0.339997	0.94305	-4.81974
COc1cc2c(Nc3cc(F)c(Br)c(F)c3)ncnc2cc1OCC1CN(C)CCO1	CHEMBL3955083	50	nM	7.30103	494.077	7	1	4.1321	TRUE	495.324	4.1321	7	1	4	0.516195	1	68.74	0.56127	0.830061	0.964248	0.344297	0.248665	0.24171	0.0840359	0.326928	0.0990462	0.602107	0.917111	0.239204	0.659974	0.974942	0.998952	0.0205834	0.022965	0.654217	0.312175	0.0238449	0.0380211	0.0518976	0.901632	0.67448	0.506586	0.124491	0.0486382	0.298028	0.310155	0.156432	0.905307	-4.50941
COc1cc2c(Nc3ccc(Cl)c(Cl)c3)ncnc2cc1OCCC1CN(C)CC(C)(C)O1	CHEMBL3939133	50	nM	7.30103	490.154	7	1	5.5669	TRUE	491.419	5.5669	7	1	3	0.46375	1	68.74	0.348663	0.80581	0.935366	0.208371	0.554167	0.175916	0.145943	0.32775	0.287458	0.817441	0.869415	0.244599	0.622259	0.892757	0.999297	0.00466806	0.01129	0.727392	0.390898	0.0311754	0.0502188	0.0310213	0.950297	0.909499	0.670012	0.0701402	0.137899	0.479531	0.197607	0.197406	0.925704	-4.67053
COc1cc2c(Nc3ccc(Br)c(F)c3F)ncnc2cc1OCC1CN(C)CCO1	CHEMBL3941947	50	nM	7.30103	494.077	7	1	4.1321	TRUE	495.324	4.1321	7	1	4	0.516195	1	68.74	0.612568	0.840249	0.963564	0.281416	0.242504	0.235149	0.079649	0.279288	0.0973117	0.595872	0.911137	0.245403	0.673107	0.974225	0.999042	0.019184	0.022461	0.616475	0.317434	0.0248268	0.0391661	0.0491098	0.896054	0.649733	0.507236	0.113853	0.0417455	0.27018	0.287163	0.151157	0.901045	-4.5224
COc1cc2c(Nc3cc(F)c(Br)cc3F)ncnc2cc1OCC1CN(C)CCO1	CHEMBL3952465	50	nM	7.30103	494.077	7	1	4.1321	TRUE	495.324	4.1321	7	1	4	0.516195	1	68.74	0.643217	0.839528	0.966272	0.319259	0.22744	0.259655	0.071305	0.329571	0.0893877	0.625378	0.91939	0.247969	0.677628	0.976327	0.999163	0.0179979	0.0207672	0.607321	0.295797	0.0244279	0.0405721	0.0493504	0.90905	0.68946	0.531747	0.127306	0.0397077	0.256522	0.312358	0.152471	0.915413	-4.51721
COc1cc2c(Nc3cc(Cl)c(Br)cc3F)ncnc2cc1OC[C@H]1CN2CCOC[C@H]2CO1	CHEMBL3959516	50	nM	7.30103	552.058	8	1	4.4154	TRUE	553.816	4.4154	8	1	3	0.449916	2	77.97	0.695368	0.800669	0.962108	0.225029	0.214042	0.116607	0.143946	0.229645	0.0775394	0.730546	0.930329	0.191549	0.683861	0.970345	0.999377	0.0191363	0.0214408	0.704448	0.518414	0.0319139	0.0506646	0.082963	0.901803	0.776328	0.731324	0.156798	0.105853	0.431618	0.487172	0.211772	0.928082	-4.6684
COc1cc2c(Nc3cccc(Cl)c3F)ncnc2cc1O[C@H]1CO[C@H]2[C@@H]1OC[C@@H]2F	CHEMBL3937048	50	nM	7.30103	449.095	7	1	4.0576	TRUE	449.841	4.0576	7	1	4	0.629262	4	74.73	0.511526	0.836967	0.959856	0.245257	0.369489	0.186748	0.210767	0.106772	0.0336826	0.656245	0.841551	0.137062	0.459998	0.981797	0.999633	0.019434	0.0302859	0.591269	0.627677	0.0260592	0.0800943	0.183126	0.93152	0.580282	0.801825	0.208346	0.061341	0.320755	0.429873	0.135649	0.860607	-4.79811
COc1cc2c(Nc3ccc(Br)c(Cl)c3)ncnc2cc1O[C@@H]1CCOC1	CHEMBL3939828	50	nM	7.30103	449.014	6	1	4.9656	TRUE	450.72	4.9656	6	1	4	0.592201	1	65.5	0.461097	0.862475	0.950864	0.944333	0.747688	0.172117	0.40762	0.345714	0.168056	0.644871	0.838641	0.10717	0.253407	0.971031	0.999923	0.0194806	0.0223043	0.888	0.668001	0.0420154	0.149165	0.130853	0.965675	0.769878	0.852202	0.230875	0.277104	0.564777	0.457962	0.292756	0.825036	-4.79961
COc1cc2c(Nc3ccc(Br)c(Cl)c3C)ncnc2cc1OCC1CN(C)CCO1	CHEMBL3924098	50	nM	7.30103	506.072	7	1	4.81572	TRUE	507.816	4.81572	7	1	3	0.513092	1	68.74	0.532323	0.843819	0.953835	0.417741	0.395458	0.198964	0.085196	0.404681	0.245177	0.795157	0.9091	0.223868	0.645112	0.953942	0.999511	0.0113977	0.0185286	0.776658	0.400509	0.0275467	0.0514234	0.0449002	0.954056	0.818893	0.671814	0.0891735	0.115693	0.342953	0.288435	0.214932	0.917965	-4.73494
COc1cc2c(Nc3ccc(Cl)c(Cl)c3)ncnc2cc1OCC1CN2CSC[C@H]2CO1	CHEMBL3917294	50	nM	7.30103	492.079	8	1	4.8413	TRUE	493.416	4.8413	8	1	4	0.523448	2	68.74	0.690653	0.789753	0.948166	0.692027	0.514162	0.141526	0.222651	0.333135	0.254814	0.653262	0.933864	0.214159	0.514006	0.954237	0.999508	0.0232191	0.0186134	0.819108	0.610728	0.0742069	0.131973	0.138247	0.880968	0.813303	0.811928	0.201822	0.264387	0.605193	0.53878	0.385066	0.908393	-4.9312
COc1cc2c(Nc3cc(Cl)c(Br)cc3F)ncnc2cc1OCC1COCCN1C	CHEMBL3958898	50	nM	7.30103	510.047	7	1	4.6464	TRUE	511.779	4.6464	7	1	3	0.48338	1	68.74	0.435289	0.858656	0.968311	0.382261	0.432361	0.276823	0.146411	0.335312	0.146115	0.716959	0.937566	0.235134	0.704319	0.974726	0.999634	0.0109876	0.0195054	0.735075	0.297024	0.0207967	0.0356818	0.0517324	0.949251	0.819276	0.618686	0.0718301	0.0550901	0.276649	0.250419	0.16224	0.899429	-4.49741
COc1cc2c(Nc3ccc(Cl)c(Cl)c3F)ncnc2cc1OC[C@@H]1CN2CCC[C@H]2C(=O)N1	CHEMBL3947712	50	nM	7.30103	505.108	7	2	4.1695	TRUE	506.365	4.1695	7	2	3	0.485584	2	88.61	0.312752	0.653087	0.897039	0.113891	0.316378	0.269243	0.382923	0.218206	0.0801679	0.843013	0.91296	0.173284	0.666789	0.974961	0.998809	0.0186695	0.0262148	0.501616	0.250498	0.0392313	0.0782525	0.101571	0.894644	0.788173	0.754098	0.141565	0.0547638	0.341658	0.503035	0.128282	0.896698	-4.92161
COc1cc2c(Nc3ccc(Cl)c(Cl)c3)ncnc2cc1OCC1CN(C)C(C)(C)C(=O)O1	CHEMBL3893846	50	nM	7.30103	490.117	8	1	4.7034	TRUE	491.375	4.7034	8	1	4	0.496957	1	85.81	0.259582	0.55648	0.949004	0.1438	0.48004	0.0966732	0.191791	0.069062	0.05405	0.696187	0.953485	0.149994	0.580578	0.965398	0.997897	0.00669126	0.0128887	0.505913	0.404016	0.0489529	0.0792732	0.0798713	0.962127	0.73519	0.606575	0.0703551	0.0803951	0.464692	0.2793	0.279902	0.760191	-4.47345
COc1cc2c(Nc3ccc(Cl)c(Cl)c3)ncnc2cc1OCCC1CN(C)C(C)(C)CO1	CHEMBL3959495	50	nM	7.30103	490.154	7	1	5.5669	TRUE	491.419	5.5669	7	1	3	0.46375	1	68.74	0.330483	0.818593	0.930629	0.256554	0.544522	0.184137	0.1694	0.309898	0.304279	0.798146	0.885499	0.222249	0.641195	0.889702	0.999179	0.00605849	0.0129941	0.711186	0.430377	0.0432154	0.0583056	0.037461	0.952395	0.883381	0.658433	0.077947	0.124351	0.441274	0.196045	0.211352	0.914633	-4.64439
COc1cc2c(N[C@H]3COC[C@@H]3OC)ncnc2cc1O[C@H]1CO[C@H]2[C@@H]1OC[C@@H]2O	CHEMBL3916828	50	nM	7.30103	419.169	10	2	0.37	TRUE	419.434	0.37	10	2	4	0.680743	6	113.42	0.441891	0.433259	0.82867	0.00490717	0.00892062	0.0689726	0.00295197	0.0270494	0.00415941	0.436478	0.0610832	0.0234692	0.188529	0.933194	0.979246	0.0146156	0.0412593	0.124612	0.159741	0.0116758	0.135257	0.00829558	0.534532	0.0203825	0.226436	0.0360392	0.00984239	0.0277025	0.258732	0.17787	0.58775	-5.33311
COc1cc2c(Nc3ccc(Cl)c(Cl)c3)ncnc2cc1OCCC1CNC(C)(C)CO1	CHEMBL3962203	50	nM	7.30103	476.138	7	2	5.2247	TRUE	477.392	5.2247	7	2	3	0.482977	1	77.53	0.273866	0.711848	0.934916	0.325781	0.653745	0.150271	0.319889	0.311122	0.214289	0.743523	0.86161	0.218918	0.505923	0.909441	0.999473	0.00781303	0.0140203	0.786687	0.508362	0.0574295	0.0833814	0.0617929	0.920881	0.820803	0.725297	0.115413	0.189392	0.584907	0.300049	0.188968	0.888141	-4.8825
COc1cc2c(Nc3ccc(F)c(Cl)c3F)ncnc2cc1OC[C@H]1CN2CCOC[C@H]2CO1	CHEMBL3956820	50	nM	7.30103	492.138	8	1	3.792	TRUE	492.91	3.792	8	1	4	0.520755	2	77.97	0.700423	0.75847	0.958962	0.152805	0.162604	0.104046	0.116778	0.166476	0.0526339	0.657022	0.907112	0.173838	0.642283	0.975658	0.999129	0.0271975	0.0254729	0.605756	0.567075	0.0402434	0.054768	0.09488	0.865126	0.602055	0.642899	0.169419	0.0647226	0.379473	0.455916	0.196126	0.897734	-4.65609
CN1C[C@@H](OC(=O)N2CCC(F)(F)C2)C[C@H](C(=O)NO)[C@H]1C(=O)N1CCN(c2ccccc2)CC1	CHEMBL569389	50.5	nM	7.29671	495.229	7	2	1.0071	TRUE	495.527	1.0071	7	2	4	0.474495	3	105.66	0.599392	0.717147	0.552317	0.00329066	0.124167	0.139535	0.0215708	0.10022	0.0437212	0.780868	0.252004	0.183571	0.820659	0.528877	0.952226	0.0126895	0.0599119	0.00589824	0.0100514	0.0087166	0.065753	0.0106473	0.815667	0.135089	0.366863	0.0383736	0.00684871	0.0110976	0.0905663	0.186674	0.687831	-5.18964
C[C@@H](Oc1cccc2ncnc(Nc3ccc4c(cnn4Cc4ccccn4)c3)c12)C(=O)N1CCOCC1	CHEMBL256576	51	nM	7.29243	509.218	9	1	3.7925	TRUE	509.57	3.7925	9	1	3	0.353179	1	107.29	0.275454	0.458642	0.900731	0.0850561	0.42916	0.358212	0.489931	0.119573	0.0513797	0.667276	0.922271	0.238587	0.633544	0.980423	0.998295	0.00562904	0.0149355	0.285276	0.22348	0.0129922	0.0683879	0.0592595	0.891215	0.747759	0.704361	0.0380904	0.0337569	0.38437	0.187015	0.12137	0.898179	-5.10717
Cc1cc(Nc2ncnc3cnc(N(C)C)cc23)ccc1OC1CCN(C(=O)CC(C)(C)C)CC1	CHEMBL231100	51	nM	7.29243	476.29	7	1	4.94882	TRUE	476.625	4.94882	7	1	4	0.538902	0	83.48	0.23761	0.665964	0.799209	0.0786069	0.440707	0.213282	0.44633	0.313551	0.0874352	0.901412	0.529701	0.230884	0.429317	0.822396	0.997637	0.0163875	0.016365	0.398879	0.187701	0.0428016	0.111239	0.0267023	0.977608	0.808067	0.750476	0.132096	0.157944	0.403315	0.193036	0.137095	0.892732	-5.07143
C#Cc1cccc(Nc2ncnc3cc(OCCCCCCC(=O)NO)c(OC)cc23)c1	CHEMBL598611	51.6	nM	7.28735	434.195	7	3	4.198	TRUE	434.496	4.198	7	3	4	0.179745	0	105.6	0.944504	0.592809	0.879973	0.395359	0.649423	0.260505	0.542477	0.203647	0.503365	0.781278	0.966021	0.271953	0.694074	0.90475	0.998248	0.0199678	0.0589321	0.799366	0.280829	0.122237	0.206282	0.045806	0.84856	0.873404	0.856954	0.345522	0.0702545	0.491115	0.646947	0.271794	0.903094	-5.19783
CC(C)C(=O)N(C)C1CN[C@H](C(=O)N2CC[C@H](c3ccccc3)C2)[C@@H](C(=O)NO)C1	CHEMBL567939	52	nM	7.284	416.242	5	3	0.969	TRUE	416.522	0.969	5	3	4	0.490418	4	101.98	0.305953	0.505377	0.643313	0.00126872	0.0469679	0.0978398	0.00511953	0.0926917	0.0292294	0.766504	0.399546	0.0465193	0.415321	0.155291	0.973259	0.00484153	0.0169236	0.0139965	0.0047512	0.00596342	0.0532782	0.000889249	0.7921	0.0482892	0.091071	0.00242563	0.00419318	0.00105279	0.00546808	0.336344	0.230623	-5.55071
N[C@H]1CCN(Cc2ccn3ncnc(Nc4ccc5c(cnn5Cc5cccc(F)c5)c4)c23)C1	CHEMBL246687	52	nM	7.284	456.219	8	2	3.543	TRUE	456.529	3.543	8	2	4	0.406317	1	89.3	0.459362	0.844185	0.892837	0.400243	0.328134	0.148112	0.239513	0.491931	0.781666	0.625521	0.983807	0.342707	0.915999	0.763401	0.999662	0.0190905	0.0241573	0.376387	0.227003	0.0152214	0.0483404	0.0052174	0.830776	0.795655	0.337791	0.0318324	0.018159	0.103848	0.0419822	0.202679	0.98715	-5.87091
O=C(NO)[C@H]1CC2(CC2)CN[C@@H]1C(=O)N1CCN(c2ccccc2)CC1	CHEMBL221857	52	nM	7.284	358.2	5	3	0.5989	TRUE	358.442	0.5989	5	3	4	0.544274	2	84.91	0.452443	0.901021	0.647762	0.0111537	0.214948	0.197597	0.0384475	0.222974	0.0274	0.774525	0.0918449	0.0496111	0.530743	0.291423	0.990072	0.0175594	0.0397716	0.0551174	0.0311921	0.0185262	0.115785	0.0105774	0.673222	0.0314638	0.285381	0.0601741	0.0204433	0.0210298	0.182342	0.41051	0.492361	-5.41807
COc1ccccc1Cc1nc2ccc(-c3nn([C@H]4CC[C@H](N5CCOCC5)CC4)c4ncnc(N)c34)cc2[nH]1	CHEMBL437584	53	nM	7.27572	538.28	9	2	4.3671	TRUE	538.656	4.3671	9	2	3	0.327132	0	120	0.498784	0.731611	0.86672	0.131848	0.61251	0.160268	0.399848	0.207005	0.357168	0.767423	0.880423	0.157107	0.669174	0.839212	0.99842	0.00475451	0.011749	0.62166	0.471534	0.0274291	0.0646078	0.0178794	0.780949	0.702697	0.532589	0.162195	0.0746033	0.588954	0.384087	0.232849	0.985643	-5.43491
O=C(C#CCN1CCOCC1)Nc1ccc2ncnc(Nc3cccc(Br)c3)c2c1	CHEMBL93386	53	nM	7.27572	465.08	6	2	3.41	TRUE	466.339	3.41	6	2	4	0.574301	0	79.38	0.520251	0.837585	0.858773	0.691157	0.666161	0.312148	0.51925	0.246818	0.280451	0.576384	0.874841	0.280129	0.778919	0.973962	0.998754	0.0244072	0.0150221	0.61376	0.276963	0.0310549	0.0993363	0.142706	0.89122	0.739221	0.694433	0.186449	0.279229	0.534708	0.521638	0.449305	0.907577	-4.82963
CNC1CCN(Cc2ccn3ncnc(Nc4ccc5c(cnn5Cc5cccc(F)c5)c4)c23)CC1	CHEMBL391779	54	nM	7.26761	484.25	8	2	4.1938	TRUE	484.583	4.1938	8	2	4	0.360835	0	75.31	0.252949	0.912493	0.782389	0.21333	0.409979	0.114038	0.225709	0.478075	0.801568	0.693847	0.805111	0.327566	0.832199	0.729357	0.998521	0.0101585	0.0124611	0.288627	0.10156	0.00725184	0.0423453	0.00426291	0.841433	0.854981	0.431986	0.0146892	0.0248401	0.090832	0.0289811	0.277011	0.986821	-5.85671
O=C(CCSC(=S)N1CCN(c2ccccc2)CC1)Nc1cccc(NC(=O)c2ccccn2)c1	CHEMBL4437943	54	nM	7.26761	505.161	6	2	4.5028	TRUE	505.669	4.5028	6	2	3	0.457892	0	77.57	0.138691	0.72103	0.576177	0.293567	0.97406	0.579531	0.954108	0.208224	0.302118	0.750976	0.919466	0.269299	0.256022	0.955052	0.997342	0.007456	0.0114632	0.2199	0.153634	0.0160127	0.115571	0.178795	0.930707	0.928684	0.863088	0.0548884	0.391871	0.687711	0.215626	0.473224	0.864131	-5.39313
COCCCN1CCN([C@H]2CC[C@H](n3nc(-c4ccc5nc(Cc6ccccc6OC)[nH]c5c4)c4c(N)ncnc43)CC2)CC1	CHEMBL443098	54	nM	7.26761	609.354	10	2	4.689	TRUE	609.779	4.689	10	2	3	0.21718	0	123.24	0.451692	0.82016	0.735352	0.066186	0.301781	0.140252	0.146223	0.423988	0.587778	0.860389	0.813924	0.155635	0.748638	0.682161	0.995933	0.00255188	0.00776254	0.45762	0.303006	0.0208664	0.0289131	0.00322268	0.764232	0.781403	0.362781	0.039469	0.0354317	0.276533	0.157691	0.315758	0.994972	-5.70015
Fc1cccc(COc2ccc(Nc3ncnc4cc(C#C[C@@H]5CCCN5)sc34)cc2Cl)c1	CHEMBL495979	54	nM	7.26761	478.103	6	2	5.9099	TRUE	478.98	5.9099	6	2	3	0.34909	1	59.07	0.461627	0.496192	0.849701	0.519135	0.861938	0.285008	0.776353	0.0959394	0.349921	0.656201	0.857543	0.267942	0.230859	0.951848	0.999651	0.0125669	0.0129425	0.698927	0.593161	0.0387553	0.203204	0.316023	0.762386	0.970736	0.926533	0.18814	0.642558	0.831468	0.516477	0.36649	0.834589	-5.28132
Fc1cccc(Cn2ncc3cc(Nc4ncnn5ccc(COC[C@@H]6CNCCO6)c45)ccc32)c1	CHEMBL246284	55	nM	7.25964	487.213	9	2	3.515	TRUE	487.539	3.515	9	2	4	0.346175	1	90.53	0.472006	0.661437	0.873388	0.126069	0.577806	0.155417	0.398254	0.167224	0.195473	0.728538	0.985181	0.227625	0.69518	0.939448	0.999094	0.00894951	0.0169876	0.319738	0.420998	0.0251422	0.07857	0.0562025	0.815796	0.820835	0.677569	0.059374	0.0447259	0.345573	0.198648	0.163381	0.960984	-5.42718
FC(F)(F)Oc1ccccc1Oc1ccc(Nc2ncnc3cc[nH]c23)cc1Cl	CHEMBL1922906	55	nM	7.25964	420.06	5	2	6.0458	TRUE	420.778	6.0458	5	2	3	0.411201	0	72.06	0.323319	0.730171	0.882598	0.968749	0.925972	0.360799	0.708141	0.234089	0.50821	0.539678	0.783099	0.297857	0.136624	0.97337	0.99983	0.00888382	0.0109393	0.912214	0.493408	0.0738291	0.249249	0.173395	0.862679	0.727898	0.723942	0.121856	0.332275	0.877469	0.459817	0.21383	0.85685	-5.00534
Fc1cccc(COc2ccc(Nc3ncncc3C#Cc3ccccn3)cc2Cl)c1	CHEMBL205045	55	nM	7.25964	430.1	5	1	5.3865	TRUE	430.87	5.3865	5	1	3	0.43022	0	59.93	0.309341	0.336009	0.860901	0.573614	0.961605	0.334524	0.847484	0.096476	0.481732	0.752034	0.932791	0.341996	0.124715	0.933609	0.999864	0.00397457	0.00987529	0.748583	0.645969	0.0439834	0.15712	0.212937	0.860337	0.85195	0.804149	0.0463612	0.557987	0.752649	0.320978	0.185941	0.80475	-5.13155
COc1cc2ncnc(Nc3ccc(OCc4ccccn4)c(C)c3)c2cc1OC	CHEMBL371888	56	nM	7.25181	402.169	7	1	4.67302	TRUE	402.454	4.67302	7	1	4	0.481037	0	78.39	0.642441	0.449	0.96088	0.661954	0.663292	0.293159	0.135928	0.221123	0.14938	0.805224	0.953672	0.255972	0.152986	0.959037	0.999335	0.0216481	0.0406573	0.850827	0.437833	0.0454266	0.158837	0.0567566	0.934207	0.861574	0.772685	0.268567	0.182881	0.539688	0.415306	0.163359	0.89895	-5.12139
CNC(=O)[C@@H](C)Oc1cccc2ncnc(Nc3ccc4c(cnn4Cc4cccc(F)c4)c3)c12	CHEMBL256994	57	nM	7.24413	470.187	7	2	4.4238	TRUE	470.508	4.4238	7	2	4	0.365698	1	93.96	0.501293	0.546818	0.951524	0.307021	0.742564	0.591392	0.550858	0.182178	0.221387	0.759446	0.973923	0.518681	0.517421	0.980219	0.999606	0.00450401	0.0155798	0.417876	0.23337	0.00583211	0.0551785	0.0495221	0.878922	0.923351	0.673763	0.027939	0.0226375	0.505967	0.0913902	0.107697	0.945268	-5.17531
COc1ccccc1Cc1nc2ccc(-c3nn([C@H]4CC[C@H](N5CCN(C(C)=O)CC5)CC4)c4ncnc(N)c34)cc2[nH]1	CHEMBL452717	59	nM	7.22915	579.307	9	2	4.199	TRUE	579.709	4.199	9	2	3	0.30612	0	131.08	0.346061	0.682811	0.715897	0.0695836	0.63537	0.226695	0.532083	0.25696	0.396219	0.862778	0.873155	0.107619	0.613421	0.875566	0.997239	0.00559217	0.0144696	0.404967	0.294326	0.0320813	0.0674874	0.011093	0.796752	0.779851	0.589142	0.0926382	0.0396867	0.43236	0.301086	0.201328	0.980069	-5.66781
CC(=O)Nc1cccc(C#Cc2cncnc2Nc2ccc(OCc3cccc(F)c3)c(Cl)c2)n1	CHEMBL205765	59	nM	7.22915	487.121	6	2	5.3449	TRUE	487.922	5.3449	6	2	3	0.356553	0	89.03	0.311326	0.293527	0.849024	0.235049	0.914027	0.352994	0.853974	0.0822323	0.436327	0.806522	0.901686	0.366891	0.253623	0.952611	0.998572	0.00406826	0.00953432	0.619783	0.364256	0.0250153	0.100174	0.146101	0.807622	0.900041	0.744022	0.0404149	0.426569	0.713821	0.428131	0.15284	0.809001	-5.26517
CNC(=O)[C@@H](C)Oc1cccc2ncnc(Nc3ccc4c(cnn4Cc4ccccn4)c3)c12	CHEMBL256364	59	nM	7.22915	453.191	8	2	3.6797	TRUE	453.506	3.6797	8	2	4	0.387087	1	106.85	0.438366	0.443146	0.944898	0.273828	0.434273	0.500496	0.281529	0.161962	0.158508	0.681365	0.950026	0.374036	0.58126	0.967097	0.998833	0.00775847	0.0196008	0.386333	0.18724	0.00947303	0.0583771	0.0355688	0.895546	0.70167	0.487489	0.035685	0.0263525	0.314211	0.123494	0.113576	0.873025	-5.42739
O=C(O[C@H]1CN[C@H](C#Cc2cc3ncnc(Nc4ccc(Cc5ccccc5)cc4)c3s2)C1)N1CCOCC1	CHEMBL455434	60	nM	7.22185	539.199	8	2	4.5765	TRUE	539.661	4.5765	8	2	3	0.35919	2	88.61	0.418143	0.500036	0.752903	0.0972911	0.639645	0.291729	0.672576	0.0921614	0.1539	0.637266	0.862414	0.169758	0.540863	0.951496	0.98905	0.0127263	0.0214236	0.343404	0.21908	0.055591	0.201315	0.253751	0.686081	0.919312	0.82355	0.293116	0.263718	0.743864	0.59387	0.327519	0.85006	-5.20658
NCCCOCc1ccn2ncnc(Nc3ccc4c(cnn4Cc4cccc(F)c4)c3)c12	CHEMBL245667	60	nM	7.22185	445.203	8	2	3.8754	TRUE	445.502	3.8754	8	2	4	0.334523	0	95.29	0.533005	0.781352	0.885978	0.341658	0.750367	0.184959	0.597447	0.271633	0.506793	0.813179	0.978384	0.365986	0.66429	0.80769	0.999297	0.0173252	0.0329906	0.464393	0.500215	0.0287952	0.0807882	0.0350129	0.785873	0.93678	0.561981	0.0812219	0.0440982	0.278487	0.108735	0.158649	0.976437	-5.86266
O=C(NO)[C@H]1CC(CC(=O)N2CCCCC2)CC[C@@H]1C(=O)N1CCN(c2ccccc2)CC1	CHEMBL497026	60	nM	7.22185	456.274	5	2	2.2757	TRUE	456.587	2.2757	5	2	4	0.523828	3	93.19	0.16816	0.91339	0.438378	0.00894718	0.426816	0.264236	0.164445	0.335779	0.0704194	0.889645	0.638518	0.0556906	0.386621	0.410244	0.994085	0.00936495	0.0341624	0.0321318	0.0171322	0.0158032	0.0985982	0.0112826	0.893936	0.310033	0.534813	0.0610814	0.0413974	0.0714035	0.128071	0.249793	0.656884	-5.23671
Fc1cccc(COc2ccc(Nc3ncncc3C#Cc3ncccn3)cc2Cl)c1	CHEMBL207869	60	nM	7.22185	431.095	6	1	4.7815	TRUE	431.858	4.7815	6	1	4	0.458271	0	72.82	0.235303	0.478857	0.907366	0.615772	0.951855	0.310003	0.841436	0.0858714	0.494021	0.762807	0.964131	0.231685	0.200495	0.964902	0.999787	0.00230326	0.00975062	0.757052	0.642333	0.0295581	0.093072	0.109437	0.875448	0.704044	0.735153	0.050249	0.3355	0.572392	0.236605	0.164578	0.8092	-5.11333
CN1CCN(c2ccc(Nc3ncc4nc(Nc5ccccc5)n(C5CCCC5)c4n3)cc2)CC1	CHEMBL2178352	60	nM	7.22185	468.275	8	2	5.1804	TRUE	468.609	5.1804	8	2	3	0.40382	0	74.14	0.276339	0.673811	0.765915	0.341668	0.209574	0.252922	0.107596	0.293265	0.317377	0.645317	0.324762	0.172386	0.358618	0.939804	0.985605	0.0442528	0.0202293	0.686293	0.491017	0.0426833	0.0925185	0.0352279	0.852911	0.814649	0.796212	0.201749	0.259683	0.759502	0.648269	0.458583	0.955786	-5.2831
Cc1ccc(Oc2ccc(Nc3ncnc4cc[nH]c34)cc2C)cn1	CHEMBL1923002	60	nM	7.22185	331.143	5	2	4.50564	TRUE	331.379	4.50564	5	2	4	0.57542	0	75.72	0.733338	0.572992	0.960857	0.973191	0.764969	0.342406	0.227366	0.409498	0.49421	0.660381	0.950784	0.188692	0.258311	0.931046	0.999899	0.0281266	0.0591726	0.914359	0.383716	0.102118	0.324425	0.0569164	0.911997	0.395691	0.691181	0.477739	0.176201	0.665257	0.524318	0.251348	0.842125	-5.26597
O=C(O[C@H]1CN[C@H](C#Cc2cc3ncnc(Nc4ccc5c(ccn5Cc5ccccc5)c4)c3s2)C1)N1CCOCC1	CHEMBL500217	60	nM	7.22185	578.21	9	2	4.9887	TRUE	578.698	4.9887	9	2	3	0.284038	2	93.54	0.403539	0.501137	0.699528	0.177439	0.692946	0.26639	0.664379	0.0912266	0.202969	0.617695	0.919654	0.138142	0.5422	0.963372	0.994071	0.0144208	0.0175934	0.437753	0.270766	0.0546043	0.197702	0.266377	0.692046	0.926471	0.836062	0.261764	0.302388	0.774678	0.657304	0.342062	0.890033	-5.21888
Fc1cccc(Cn2ncc3cc(Nc4ncnn5ccc(COC[C@H]6CNCCO6)c45)ccc32)c1	CHEMBL428046	60	nM	7.22185	487.213	9	2	3.515	TRUE	487.539	3.515	9	2	4	0.346175	1	90.53	0.504887	0.677419	0.887277	0.138218	0.546065	0.150523	0.347885	0.183139	0.210333	0.723128	0.986261	0.238939	0.722096	0.93671	0.999178	0.0092396	0.0167491	0.310031	0.412219	0.0235204	0.0742626	0.0500595	0.820121	0.810536	0.655356	0.0548846	0.0416611	0.317003	0.176578	0.167833	0.962006	-5.42521
Cc1cncc(COc2ccc(Nc3ncnn4ccc(CN5CCC(N)CC5)c34)cc2Cl)c1	CHEMBL248115	60	nM	7.22185	477.204	8	2	4.33182	TRUE	478	4.33182	8	2	4	0.408779	0	93.6	0.268634	0.807377	0.911977	0.322552	0.433267	0.0871485	0.261581	0.462215	0.816465	0.821949	0.891927	0.231776	0.873195	0.605381	0.999792	0.0106844	0.0141284	0.421128	0.333341	0.0313525	0.0861829	0.00619652	0.908598	0.840558	0.434148	0.0183597	0.0675837	0.12829	0.0569444	0.218544	0.963115	-5.91028
O=C(O[C@H]1CN[C@H](C#Cc2cc3ncnc(Nc4ccc(Oc5ccccn5)c(Cl)c4)c3s2)C1)N1CCOCC1	CHEMBL453398	60	nM	7.22185	576.135	10	2	4.8264	TRUE	577.066	4.8264	10	2	3	0.322798	2	110.73	0.403228	0.401729	0.783562	0.101995	0.509019	0.190215	0.526925	0.0763137	0.169162	0.694361	0.851573	0.146285	0.629566	0.976905	0.991664	0.0109017	0.0151009	0.460338	0.261822	0.0478837	0.133068	0.18352	0.795944	0.773694	0.853297	0.154262	0.183179	0.734001	0.661373	0.296505	0.827574	-5.1812
O=C(/C=C/CN1CCCC1)Nc1cc2c(Nc3ccc4c(cnn4Cc4ccccc4)c3)ncnc2cn1	CHEMBL3948267	62	nM	7.20761	504.239	8	2	4.7569	TRUE	504.598	4.7569	8	2	3	0.294004	0	100.86	0.333794	0.63647	0.681887	0.223184	0.551868	0.213332	0.515137	0.232658	0.333023	0.659046	0.65258	0.365262	0.720817	0.9351	0.985241	0.0301355	0.0199676	0.497637	0.142623	0.0262455	0.0932644	0.0458026	0.824544	0.83058	0.740122	0.183152	0.12452	0.51252	0.469555	0.260895	0.936318	-5.62446
CN(C)C/C=C/C(=O)Nc1cc2c(Nc3ccc4c(cnn4Cc4ccccc4)c3)ncnc2cn1	CHEMBL3949347	62	nM	7.20761	478.223	8	2	4.2227	TRUE	478.56	4.2227	8	2	4	0.322076	0	100.86	0.46307	0.601722	0.794832	0.16714	0.374363	0.292053	0.211385	0.191277	0.29543	0.688702	0.622789	0.472685	0.71235	0.933929	0.968202	0.0344275	0.0337955	0.450527	0.163137	0.0285514	0.073472	0.0430243	0.811569	0.796791	0.516974	0.15275	0.0856901	0.473324	0.399974	0.181397	0.911923	-5.59461
Cc1cc(Nc2c(C#N)cnc3ccc(NC(=O)/C=C/CN(C)C)cc23)ccc1Oc1cc2nncn2cn1	CHEMBL5180725	62.26	nM	7.20579	519.213	10	2	4.4448	TRUE	519.569	4.4448	10	2	3	0.285323	0	133.36	0.504284	0.376402	0.86888	0.031038	0.171494	0.258176	0.190044	0.144151	0.119867	0.787753	0.701504	0.465171	0.787441	0.955409	0.955609	0.0196852	0.0204135	0.251283	0.112842	0.0250952	0.0419536	0.0473625	0.735531	0.915366	0.460159	0.135072	0.0522508	0.447773	0.499135	0.133648	0.897921	-5.64074
OC1CCN(Cc2ccn3ncnc(Nc4ccc5c(cnn5Cc5cccc(F)c5)c4)c23)CC1	CHEMBL401443	63	nM	7.20066	471.218	8	2	3.9667	TRUE	471.54	3.9667	8	2	4	0.390042	0	83.51	0.117224	0.794513	0.729625	0.182189	0.366509	0.147331	0.260229	0.418682	0.568829	0.651434	0.687946	0.268402	0.742208	0.781433	0.998949	0.0120862	0.0203809	0.266587	0.117702	0.00520357	0.0509034	0.00380587	0.772633	0.885555	0.438423	0.0120229	0.0198857	0.153958	0.0359613	0.166621	0.981068	-5.68624
O=C(Nc1cccc(NC(=O)c2ccccn2)c1)NC1CCCCC1	CHEMBL4437803	64	nM	7.19382	338.174	3	3	3.7881	TRUE	338.411	3.7881	3	3	4	0.792954	0	83.12	0.352633	0.945634	0.953996	0.567091	0.799132	0.689276	0.656773	0.258151	0.0961292	0.453909	0.471611	0.353392	0.382709	0.871909	0.999682	0.00888677	0.0275794	0.526698	0.113853	0.0157803	0.198626	0.0183248	0.915643	0.134375	0.393539	0.184078	0.143238	0.907272	0.150547	0.41005	0.428201	-4.87221
Fc1cccc(COc2ccc(Nc3ncncc3C#Cc3cc[nH]n3)cc2Cl)c1	CHEMBL205284	66	nM	7.18046	419.095	5	2	4.7146	TRUE	419.847	4.7146	5	2	4	0.45787	0	75.72	0.222107	0.411039	0.880388	0.830388	0.980119	0.350956	0.952248	0.158073	0.588143	0.721677	0.975041	0.260552	0.157222	0.948471	0.999905	0.0019098	0.00747458	0.853682	0.696034	0.0453224	0.130327	0.142417	0.802448	0.773764	0.701923	0.0877264	0.421366	0.824659	0.337684	0.157763	0.873948	-5.23967
CNC(=O)[C@@H](C)Oc1cccc2ncnc(Nc3ccc(OCc4ccccn4)c(Cl)c3)c12	CHEMBL403594	66	nM	7.18046	463.141	7	2	4.5141	TRUE	463.925	4.5141	7	2	4	0.39624	1	98.26	0.463492	0.438801	0.948372	0.437615	0.741792	0.44095	0.387041	0.136177	0.25487	0.767707	0.93688	0.364948	0.439726	0.967945	0.999035	0.00560392	0.0137708	0.595447	0.306853	0.0144066	0.0793792	0.0720358	0.927903	0.805995	0.664003	0.0390832	0.0802973	0.342234	0.132948	0.156544	0.79034	-5.35654
C#Cc1cccc(Nc2ncnc3ccc(OCc4ccc(C(=O)Nc5ccccc5N)cc4)cc23)c1	CHEMBL3218000	66	nM	7.18046	485.185	6	3	5.7682	TRUE	485.547	5.7682	6	3	3	0.199858	0	102.16	0.806673	0.359024	0.867024	0.243017	0.730452	0.483682	0.557374	0.126329	0.240472	0.722176	0.92048	0.553408	0.336826	0.970269	0.989512	0.0145658	0.0821622	0.829059	0.449833	0.0638405	0.277712	0.111428	0.629616	0.890269	0.843364	0.160076	0.141003	0.755553	0.464891	0.263318	0.938564	-5.45418
Clc1cccc(Nc2ccnc3[nH]c4ccccc4c23)c1	CHEMBL3133822	66	nM	7.18046	293.072	2	2	5.1131	TRUE	293.757	5.1131	2	2	3	0.538788	0	40.71	0.729631	0.925711	0.888163	0.998564	0.895736	0.184948	0.392115	0.293449	0.805426	0.547788	0.893732	0.141271	0.0703367	0.975634	0.999997	0.0716657	0.0130477	0.968635	0.585431	0.12363	0.221977	0.150947	0.960619	0.427571	0.88311	0.208018	0.532581	0.915165	0.776973	0.609894	0.698896	-4.82155
CCCCN(CC#CC(=O)Nc1cc2c(Nc3ccc(F)c(Cl)c3)ncnc2cn1)CCCC	CHEMBL202421	67	nM	7.17393	482.2	6	2	5.405	TRUE	482.991	5.405	6	2	3	0.376076	0	83.04	0.532535	0.800357	0.752525	0.390196	0.656761	0.236518	0.69755	0.242253	0.578561	0.734873	0.821023	0.393691	0.800592	0.830813	0.995582	0.0324179	0.0173841	0.664358	0.271383	0.0591094	0.113217	0.228831	0.871799	0.908192	0.676419	0.234469	0.340118	0.615271	0.536524	0.378189	0.890075	-4.91852
CC(C)c1cccc(C2CCN(C(=O)[C@H]3CC[C@H](CC(=O)N4CCCCC4)C[C@@H]3C(=O)NO)CC2)c1	CHEMBL496829	67	nM	7.17393	497.325	4	2	4.4565	TRUE	497.68	4.4565	4	2	4	0.448654	3	89.95	0.410412	0.787453	0.628468	0.0319612	0.448378	0.133476	0.224723	0.237742	0.25508	0.874983	0.927552	0.0800054	0.525045	0.329612	0.998213	0.00878273	0.0143352	0.028268	0.0370549	0.0306957	0.0815224	0.0144716	0.940602	0.679776	0.575514	0.0549378	0.123452	0.18431	0.102357	0.385648	0.638978	-5.42887
CNC(=O)NCc1cccc(C#Cc2cncnc2Nc2ccc(OCc3cccc(F)c3)c(Cl)c2)n1	CHEMBL380078	69	nM	7.16115	516.148	6	3	4.8155	TRUE	516.964	4.8155	6	3	3	0.304563	0	101.06	0.183766	0.319923	0.847588	0.321128	0.936891	0.468975	0.880542	0.153183	0.450327	0.79254	0.981674	0.268526	0.313293	0.945428	0.998961	0.00270681	0.00760107	0.512231	0.227642	0.0138458	0.0520767	0.147921	0.82597	0.840024	0.622777	0.019451	0.244865	0.585501	0.22485	0.11471	0.820462	-5.31204
Cc1ccc(Oc2ccc(Nc3ncnc4cccc(O[C@H](C)C(=O)N(C)CCO)c34)cc2C)cn1	CHEMBL257478	69	nM	7.16115	487.222	8	2	4.39554	TRUE	487.56	4.39554	8	2	4	0.357637	1	109.7	0.383014	0.224398	0.885346	0.110722	0.362711	0.487756	0.27973	0.159835	0.200287	0.793431	0.938148	0.367402	0.567786	0.911013	0.998253	0.00843098	0.0195022	0.447395	0.21354	0.00707847	0.0487365	0.029609	0.887471	0.918669	0.442948	0.0204181	0.0344977	0.44977	0.0815786	0.0797297	0.92969	-5.02756
Fc1cccc(Cn2ncc3cc(Nc4ncnn5ccc(COC6CCNCC6)c45)ccc32)c1	CHEMBL245869	70	nM	7.1549	471.218	8	2	4.2786	TRUE	471.54	4.2786	8	2	4	0.368872	0	81.3	0.357597	0.760378	0.845163	0.172583	0.651474	0.133393	0.485645	0.217907	0.370041	0.75998	0.893292	0.270702	0.708059	0.861181	0.999239	0.0106136	0.020345	0.298539	0.355998	0.0236476	0.0922566	0.0332678	0.849252	0.905315	0.714843	0.0533615	0.0609014	0.251067	0.109849	0.211752	0.95955	-5.73111
Cc1ncnc(Nc2ccc(OCc3cccc(F)c3)c(Cl)c2)c1C#C/C=N/OCCN1CCOCC1	CHEMBL1683972	70	nM	7.1549	523.179	8	1	4.58622	TRUE	523.996	4.58622	8	1	3	0.190098	0	81.1	0.341904	0.529958	0.705277	0.0719249	0.878448	0.12688	0.596889	0.189701	0.409985	0.878083	0.968916	0.284628	0.452119	0.836426	0.997637	0.00377396	0.0106156	0.475106	0.303305	0.0444936	0.0708785	0.057332	0.727804	0.981362	0.80459	0.0580626	0.466297	0.495807	0.183232	0.266914	0.926762	-4.88401
O=C(NO)[C@H]1CC(OC(=O)N2CCCC2)CN[C@@H]1C(=O)N1Cc2ccccc2C1	CHEMBL586042	70	nM	7.1549	402.19	6	3	0.6133	TRUE	402.451	0.6133	6	3	4	0.504771	3	111.21	0.594503	0.725796	0.734676	0.0135146	0.117558	0.0994229	0.0246441	0.143714	0.0303698	0.708205	0.129676	0.0614752	0.599183	0.397318	0.955626	0.0168805	0.04001	0.0356986	0.00759158	0.0185751	0.161526	0.00499836	0.652577	0.0333374	0.19413	0.0792025	0.0064118	0.00466754	0.192519	0.257654	0.428604	-5.42238
N[C@@H]1CCN(Cc2ccn3ncnc(Nc4ccc5c(cnn5Cc5cccc(F)c5)c4)c23)C1	CHEMBL393848	70	nM	7.1549	456.219	8	2	3.543	TRUE	456.529	3.543	8	2	4	0.406317	1	89.3	0.4228	0.846852	0.88543	0.389211	0.370626	0.160209	0.281491	0.474438	0.762062	0.647392	0.981449	0.336683	0.907208	0.775128	0.999643	0.0180529	0.0235922	0.381581	0.225728	0.0153725	0.0503719	0.00603989	0.830829	0.805316	0.353636	0.0325699	0.0200395	0.115155	0.0458808	0.196791	0.986415	-5.8565
CN1CCC(Oc2cccc3ncnc(Nc4ccc(OCc5ccccn5)cc4)c23)CC1	CHEMBL194337	70	nM	7.1549	441.216	7	1	4.8204	TRUE	441.535	4.8204	7	1	4	0.440738	0	72.4	0.280863	0.735866	0.862988	0.224574	0.126821	0.173072	0.0471812	0.510135	0.332994	0.764098	0.244952	0.227482	0.715912	0.762701	0.984814	0.0156094	0.0242857	0.373396	0.130263	0.0215967	0.110464	0.0142376	0.859219	0.646737	0.450836	0.0454128	0.100667	0.144895	0.161064	0.208484	0.941124	-5.17845
COc1ccc(Nc2ncnn3ccc(CN4CCC(N)CC4)c23)cc1Cl	CHEMBL1645477	70	nM	7.1549	386.162	7	2	3.058	TRUE	386.887	3.058	7	2	4	0.701041	0	80.71	0.322006	0.97626	0.925279	0.343636	0.199956	0.0579265	0.0418391	0.619485	0.860245	0.623869	0.318392	0.123775	0.819388	0.458704	0.999833	0.00732181	0.0169913	0.479424	0.129174	0.0143435	0.0967503	0.00173553	0.886056	0.323513	0.192948	0.0277597	0.0147313	0.0248314	0.0318218	0.234581	0.929314	-5.336
Cc1ncnc(Nc2ccc(OCc3cccc(F)c3)c(Cl)c2)c1/C=C(\F)C(=O)NCCS(C)(=O)=O	CHEMBL1683968	71	nM	7.14874	536.11	7	2	4.37132	TRUE	536.988	4.37132	7	2	3	0.370106	0	110.28	0.347657	0.704714	0.879866	0.283698	0.761188	0.589311	0.695833	0.216104	0.214384	0.825402	0.955194	0.53352	0.288614	0.947439	0.99666	0.00789506	0.00815181	0.0889791	0.166362	0.0145154	0.041236	0.18394	0.709437	0.919396	0.600299	0.0178639	0.132977	0.375767	0.134748	0.135906	0.842032	-5.17179
COc1cc2c(Nc3ccc(F)c(Cl)c3)ncnc2cc1OCCCCCCC(=O)NO	CHEMBL598610	71.2	nM	7.14752	462.147	7	3	5.0092	TRUE	462.909	5.0092	7	3	3	0.208783	0	105.6	0.794699	0.74184	0.914146	0.382224	0.793724	0.252594	0.710955	0.206717	0.293667	0.851879	0.954133	0.232384	0.63506	0.940453	0.999362	0.00720128	0.0124075	0.79782	0.343756	0.0459214	0.0999703	0.0680909	0.90256	0.937398	0.80116	0.150461	0.0823985	0.485263	0.577931	0.21139	0.917909	-5.28124
COC[C@H]1CCCN1/N=C/c1c(N)ncnc1Nc1ccc2c(cnn2Cc2cccc(F)c2)c1	CHEMBL515664	72	nM	7.14267	474.229	9	2	3.7842	TRUE	474.544	3.7842	9	2	4	0.374371	1	106.48	0.666635	0.711272	0.926327	0.126815	0.684042	0.175451	0.546617	0.147938	0.113065	0.78191	0.969108	0.247828	0.72293	0.938321	0.999746	0.00466762	0.0169622	0.647338	0.565796	0.0274258	0.0577152	0.0256315	0.933332	0.819495	0.652762	0.109923	0.0400722	0.268241	0.163473	0.159205	0.969616	-5.37862
O=C(C#CCN1CCCCC1)Nc1ccc2ncnc(Nc3cccc(Br)c3)c2c1	CHEMBL90595	73	nM	7.13668	463.101	5	2	4.5637	TRUE	464.367	4.5637	5	2	4	0.55431	0	70.15	0.454168	0.947262	0.78392	0.798502	0.70212	0.254274	0.482641	0.469575	0.66423	0.615197	0.766551	0.315684	0.839938	0.892799	0.998844	0.0303229	0.0120825	0.570234	0.225179	0.0230137	0.13334	0.0961947	0.9224	0.88963	0.764594	0.157919	0.326112	0.440621	0.333971	0.537814	0.935718	-5.00337
C=CC(=O)Nc1ccc2c(Nc3cccc(Br)c3)ncnc2c1	CHEMBL443523	73	nM	7.13668	368.027	4	2	4.2604	TRUE	369.222	4.2604	4	2	4	0.674718	0	66.91	0.650647	0.922475	0.907807	0.965275	0.78735	0.317925	0.265415	0.282744	0.640194	0.587464	0.744393	0.221695	0.291028	0.970578	0.999753	0.0941216	0.0751597	0.90388	0.342449	0.0666882	0.416333	0.0766719	0.932259	0.489167	0.832828	0.464669	0.283072	0.738107	0.694026	0.424329	0.604826	-4.93028
CC1CNCCN(Cc2ccn3ncnc(Nc4ccc5c(cnn5Cc5cccc(F)c5)c4)c23)C1	CHEMBL398793	74	nM	7.13077	484.25	8	2	4.0513	TRUE	484.583	4.0513	8	2	4	0.378824	1	75.31	0.398056	0.849471	0.8528	0.334214	0.572541	0.219931	0.41806	0.428069	0.784448	0.735595	0.971264	0.429429	0.842406	0.827746	0.999257	0.0121157	0.0167136	0.341618	0.189453	0.0123073	0.0464886	0.0115513	0.842749	0.909079	0.485642	0.0284641	0.0318707	0.190548	0.063348	0.229533	0.986764	-5.78778
Cc1ncnc(Nc2ccc(OCc3cccc(F)c3)c(Cl)c2)c1C#CCCN1CCOCC1	CHEMBL1683970	74	nM	7.13077	480.173	6	1	4.97392	TRUE	480.971	4.97392	6	1	4	0.481508	0	59.51	0.351731	0.640759	0.867216	0.175121	0.902259	0.224985	0.688353	0.215803	0.543833	0.850754	0.970077	0.333395	0.552912	0.830406	0.99961	0.00370251	0.00817747	0.458981	0.418204	0.0437019	0.0766449	0.061717	0.837592	0.976891	0.766809	0.0296139	0.418159	0.574752	0.193422	0.227226	0.917983	-4.83104
COc1cc2ncnc(Nc3ccc(F)c(Cl)c3)c2cc1NC(=O)/C(F)=C/CN(C)C	CHEMBL3357634	75	nM	7.12494	447.127	6	2	4.528	TRUE	447.873	4.528	6	2	4	0.518017	0	79.38	0.711263	0.855985	0.952626	0.377578	0.177444	0.391431	0.072136	0.250252	0.222641	0.704937	0.790492	0.399864	0.717569	0.961142	0.997722	0.0255522	0.0148833	0.5042	0.210898	0.0218536	0.0497291	0.0419999	0.928223	0.774906	0.375591	0.090516	0.0443837	0.286196	0.189967	0.223697	0.865577	-4.90977
O=C(CCCl)Nc1ccc2ncnc(Nc3ccc4[nH]cc(Br)c4c3)c2c1	CHEMBL5208454	75.1	nM	7.12436	443.015	4	3	5.1846	TRUE	444.72	5.1846	4	3	3	0.370191	0	82.7	0.675091	0.773541	0.806088	0.959193	0.842052	0.260434	0.43909	0.385719	0.683171	0.605809	0.910461	0.325698	0.400557	0.934841	0.999132	0.0656882	0.0285558	0.882489	0.336807	0.154226	0.352646	0.104784	0.802035	0.715943	0.763818	0.360519	0.385079	0.678757	0.752966	0.326207	0.849472	-5.48698
CO/N=C/c1c(N)ncnc1Nc1ccc2[nH]c(Cc3cccc(F)c3)nc2c1	CHEMBL402316	76	nM	7.11919	391.156	7	3	3.3889	TRUE	391.41	3.3889	7	3	4	0.342875	0	114.1	0.578418	0.635201	0.81763	0.5542	0.8615	0.215092	0.525534	0.242811	0.422686	0.638248	0.945151	0.303512	0.270203	0.891028	0.998657	0.010037	0.026257	0.825127	0.348506	0.0399394	0.16513	0.0254407	0.674296	0.711862	0.472316	0.198043	0.10817	0.315959	0.148291	0.256926	0.931203	-5.51684
O[C@@H]1CNCCN(Cc2ccn3ncnc(Nc4ccc5c(cnn5Cc5cccc(F)c5)c4)c23)C1	CHEMBL393787	76	nM	7.11919	486.229	9	3	2.7761	TRUE	486.555	2.7761	9	3	4	0.339747	1	95.54	0.246096	0.521213	0.728941	0.143622	0.334899	0.211481	0.219203	0.432726	0.583454	0.54786	0.916754	0.348146	0.770765	0.838381	0.99731	0.0144407	0.025006	0.297022	0.0887549	0.00473427	0.0379263	0.00425232	0.621409	0.788072	0.252939	0.0109754	0.0124551	0.146891	0.0519763	0.155671	0.983876	-5.88909
Fc1cccc(Cn2ncc3cc(Nc4ncnn5ccc(CNC6CCNCC6)c45)ccc32)c1	CHEMBL392664	76	nM	7.11919	470.234	8	3	3.8516	TRUE	470.556	3.8516	8	3	4	0.335165	0	84.1	0.333806	0.790247	0.820738	0.179066	0.486081	0.125242	0.252225	0.361935	0.612247	0.675277	0.811454	0.335747	0.774109	0.785681	0.99847	0.0142069	0.0201608	0.278847	0.17253	0.0149386	0.0678652	0.0109527	0.787589	0.767682	0.47535	0.0259003	0.0271967	0.138902	0.0545122	0.251025	0.972963	-6.03178
C#Cc1cc(Nc2ncnc3cc(OC)c(OCCCCCCC(=O)NO)cc23)ccc1F	CHEMBL598798	76.5	nM	7.11634	452.186	7	3	4.3371	TRUE	452.486	4.3371	7	3	4	0.17202	0	105.6	0.951111	0.625866	0.912332	0.264337	0.564718	0.256026	0.528609	0.142108	0.41129	0.78221	0.966848	0.328193	0.755688	0.925928	0.998345	0.0142219	0.0344262	0.690255	0.245864	0.0837012	0.143164	0.049094	0.802631	0.898563	0.851357	0.259406	0.041498	0.386635	0.545403	0.22861	0.908904	-5.0291
NC(=O)Nc1ccc2ncnc(Nc3ccc(Oc4cccc(C(F)(F)F)c4)c(Cl)c3)c2c1	CHEMBL3633774	77	nM	7.11351	473.087	5	3	6.3285	TRUE	473.842	6.3285	5	3	3	0.314181	0	102.16	0.340724	0.774803	0.954825	0.840098	0.836866	0.398298	0.562215	0.237902	0.24073	0.590775	0.742632	0.523007	0.400632	0.957462	0.999366	0.0196121	0.0295913	0.497374	0.259284	0.0298182	0.145336	0.22248	0.735709	0.85375	0.594105	0.0952345	0.124359	0.820569	0.511603	0.0818247	0.877995	-5.06683
O=C(CCl)OCCn1c(=O)oc2cc3ncnc(Nc4ccc(N5CCCCC5)c(Cl)c4)c3cc21	CHEMBL3912361	77	nM	7.11351	515.113	9	1	4.707	TRUE	516.385	4.707	9	1	3	0.278545	0	102.49	0.286136	0.759998	0.625866	0.669448	0.897849	0.0763689	0.690498	0.0838236	0.293757	0.447099	0.85784	0.112103	0.377572	0.936183	0.99869	0.0312154	0.0312773	0.47093	0.500258	0.0768726	0.193814	0.262819	0.869723	0.83724	0.86253	0.237088	0.390722	0.537279	0.387837	0.401975	0.782163	-5.15969
CCC1=C2C(Nc3ccc4c(cnn4Cc4ccccc4)c3)=NC=NC2N=C1NC(=O)OCCN1CCOCC1	CHEMBL578255	77	nM	7.11351	540.26	10	2	3.4401	TRUE	540.628	3.4401	10	2	3	0.474197	1	117.73	0.300959	0.834571	0.849379	0.258777	0.827573	0.352498	0.853967	0.245383	0.318587	0.642804	0.914405	0.166596	0.699586	0.935224	0.998572	0.00527643	0.0109395	0.370734	0.167156	0.0189208	0.0649887	0.102306	0.813529	0.940219	0.76845	0.157776	0.0745392	0.622497	0.456243	0.213377	0.942042	-5.51808
COc1ccc(-c2c(CN3CCOCC3)nc3scc(C(=O)NN)n23)cc1	CHEMBL5173449	78	nM	7.10791	387.137	8	2	1.5071	TRUE	387.465	1.5071	8	2	4	0.391531	0	94.12	0.847354	0.551214	0.904325	0.204445	0.372797	0.217777	0.313499	0.129158	0.150757	0.412735	0.835542	0.314892	0.67292	0.899602	0.998945	0.00602611	0.011035	0.714499	0.16526	0.0362878	0.170196	0.00852201	0.734783	0.356586	0.302449	0.066522	0.0744112	0.0785462	0.0812388	0.440673	0.803164	-4.98985
Cc1ncnc(Nc2ccc(OCc3cccc(F)c3)c(Cl)c2)c1/C=C(\F)C(=O)NCCN1CCOCC1	CHEMBL1683965	78	nM	7.10791	543.185	7	2	4.65892	TRUE	544.002	4.65892	7	2	3	0.359567	0	88.61	0.453895	0.671971	0.912025	0.0806444	0.612483	0.284547	0.445496	0.149058	0.274014	0.800254	0.942156	0.420632	0.744655	0.941866	0.998141	0.00593625	0.00738514	0.197214	0.220234	0.0168126	0.048986	0.0752259	0.830942	0.940875	0.644288	0.0241731	0.0884359	0.452157	0.168172	0.213429	0.913811	-4.92006
Cc1ccc(Oc2ccc(Nc3ncnc4cccc(O[C@@H](C)C(=O)N(C)CCO)c34)cc2C)cn1	CHEMBL430410	78	nM	7.10791	487.222	8	2	4.39554	TRUE	487.56	4.39554	8	2	4	0.357637	1	109.7	0.389115	0.233305	0.893203	0.118767	0.344061	0.485247	0.257048	0.1705	0.207158	0.795046	0.940918	0.366704	0.581527	0.909293	0.998437	0.00837725	0.0191337	0.451285	0.207792	0.00677594	0.046341	0.0271219	0.893088	0.919651	0.431289	0.0195895	0.032009	0.427133	0.0737785	0.0799545	0.933906	-5.02635
C[C@H](Oc1cccc2ncnc(Nc3ccc(OCc4ccccn4)c(Cl)c3)c12)C(=O)N(C)CCO	CHEMBL256060	79	nM	7.10237	507.167	8	2	4.2188	TRUE	507.978	4.2188	8	2	3	0.328167	1	109.7	0.287887	0.227757	0.880778	0.271645	0.62286	0.460352	0.420931	0.120627	0.214156	0.714916	0.92233	0.30637	0.41966	0.940649	0.998556	0.00629319	0.0116695	0.438363	0.301978	0.00708139	0.0566792	0.0591912	0.891322	0.858464	0.494013	0.0129	0.0498889	0.405411	0.0967812	0.112987	0.868075	-5.23041
C[C@H](Oc1cccc2ncnc(Nc3ccc4c(cnn4Cc4ccccn4)c3)c12)C(=O)N(C)C	CHEMBL402657	80	nM	7.09691	467.207	8	1	4.0219	TRUE	467.533	4.0219	8	1	4	0.385979	1	98.06	0.420141	0.501673	0.921672	0.209672	0.431867	0.500574	0.289309	0.184637	0.146358	0.742071	0.94797	0.358326	0.585155	0.957216	0.998388	0.0087653	0.0196001	0.335359	0.241951	0.0120293	0.0567351	0.0327636	0.930345	0.813391	0.545986	0.0331793	0.0281671	0.328957	0.103017	0.112306	0.900642	-5.2338
Nc1ncnc(Nc2ccc(OCc3ccccc3)c(Cl)c2)c1-c1nnc(CCN2CCOCC2)o1	CHEMBL472545	80	nM	7.09691	507.179	10	2	3.9595	TRUE	507.982	3.9595	10	2	3	0.343596	0	124.45	0.554124	0.616034	0.892528	0.144468	0.80507	0.161096	0.558047	0.119406	0.328363	0.718892	0.883768	0.386904	0.739139	0.956142	0.993744	0.00368644	0.0081027	0.283904	0.218826	0.0307293	0.0681164	0.0499045	0.715387	0.648546	0.664059	0.0330089	0.092365	0.203361	0.187683	0.34919	0.872046	-5.1161
C/C(=C\c1c(C)ncnc1Nc1ccc(OCc2cccc(F)c2)c(Cl)c1)C(=O)NCCN1CCOCC1	CHEMBL1683963	81	nM	7.09151	539.21	7	2	4.75182	TRUE	540.039	4.75182	7	2	3	0.359325	0	88.61	0.32585	0.562919	0.864828	0.0741539	0.73707	0.227552	0.44921	0.163572	0.355052	0.90433	0.963426	0.354399	0.686687	0.893432	0.997655	0.00655576	0.00992951	0.311418	0.195513	0.0351528	0.0609791	0.05484	0.843393	0.931295	0.731455	0.0322148	0.167242	0.377799	0.299698	0.160884	0.902516	-5.06519
Fc1cccc(Cn2ncc3cc(Nc4ncnn5ccc(CN6CCNCC6)c45)ccc32)c1	CHEMBL231875	81	nM	7.09151	456.219	8	2	3.4152	TRUE	456.529	3.4152	8	2	4	0.407943	0	75.31	0.26603	0.852369	0.807683	0.403607	0.669838	0.33649	0.413219	0.505607	0.688564	0.661696	0.975612	0.407795	0.808579	0.903281	0.999163	0.0120532	0.0184135	0.296767	0.119543	0.011483	0.0417824	0.0137905	0.813359	0.813465	0.465231	0.0102576	0.018313	0.129009	0.0516379	0.254712	0.986998	-5.62513
CN/N=C/c1c(N)ncnc1Nc1ccc2c(cnn2Cc2cccc(F)c2)c1	CHEMBL497697	84	nM	7.07572	390.172	8	3	2.8928	TRUE	390.426	2.8928	8	3	4	0.345277	0	106.04	0.656681	0.692835	0.941172	0.578961	0.744413	0.282189	0.338825	0.220573	0.239017	0.621383	0.96266	0.428877	0.43327	0.942017	0.999571	0.0104359	0.031794	0.786361	0.50853	0.0256774	0.0890701	0.0261825	0.865405	0.446144	0.463159	0.152501	0.0370173	0.336815	0.111228	0.182302	0.91166	-5.56664
C=CC(=O)Nc1cccc(-c2c(-c3ccc(N4CCN(C)CC4)cc3)[nH]c3ncn(CC)c(=O)c23)c1	CHEMBL4795863	84	nM	7.07572	482.243	6	2	3.9548	TRUE	482.588	3.9548	6	2	4	0.406567	0	86.26	0.327033	0.465417	0.639204	0.186323	0.309709	0.350949	0.241599	0.246751	0.0667901	0.71698	0.491319	0.366316	0.636058	0.964307	0.946436	0.0318063	0.0235933	0.205361	0.120544	0.0286781	0.0575627	0.0330369	0.647398	0.816825	0.462685	0.117148	0.11319	0.414667	0.37746	0.28086	0.903084	-4.9786
C=CCN(C)CC#CC(=O)Nc1ccc2ncnc(Nc3cccc(Br)c3)c2c1	CHEMBL414220	85	nM	7.07058	449.085	5	2	4.1956	TRUE	450.34	4.1956	5	2	4	0.43545	0	70.15	0.672499	0.913267	0.849865	0.879674	0.735862	0.467881	0.382605	0.43623	0.847253	0.694865	0.918995	0.548362	0.7677	0.929291	0.998604	0.0255856	0.015422	0.624494	0.166336	0.0170578	0.117293	0.0998141	0.910033	0.886481	0.582595	0.111086	0.238636	0.446289	0.289325	0.464722	0.917318	-5.05266
COCc1cccc2[nH]c(-c3n[nH]c4ncc(-c5cncc6ccccc56)cc34)nc12	CHEMBL248891	85	nM	7.07058	406.154	5	2	4.8628	TRUE	406.449	4.8628	5	2	4	0.436001	0	92.37	0.558177	0.556142	0.771148	0.960424	0.764828	0.212129	0.699289	0.279922	0.461286	0.607663	0.965574	0.0788592	0.42964	0.936072	0.999849	0.0581742	0.0143404	0.914118	0.705211	0.14285	0.138705	0.172294	0.927332	0.935581	0.725909	0.255706	0.368186	0.654871	0.678706	0.389948	0.973606	-5.40733
COc1cc2ncnc(Nc3ccc(F)c(Cl)c3)c2cc1NC(=O)/C=C/CN1CCCCCC1	CHEMBL3680378	85.98	nM	7.0656	483.184	6	2	5.5452	TRUE	483.975	5.5452	6	2	3	0.429087	0	79.38	0.517885	0.765392	0.833228	0.308168	0.573293	0.204271	0.39637	0.338608	0.516529	0.7955	0.874631	0.319681	0.777811	0.925441	0.997329	0.0279948	0.0153917	0.69679	0.228827	0.0683002	0.129918	0.0856933	0.896151	0.939156	0.787254	0.192335	0.285068	0.503196	0.551926	0.246772	0.906845	-4.99626
CCS(=O)(=O)N[C@H]1CN[C@H](C#Cc2cc3ncnc(Nc4ccc(OCc5cccc(F)c5)c(Cl)c4)c3s2)C1	CHEMBL501705	87	nM	7.06048	585.107	8	3	4.8277	TRUE	586.114	4.8277	8	3	3	0.254462	2	105.24	0.358744	0.428497	0.765283	0.465343	0.834463	0.338838	0.802669	0.139515	0.552499	0.775532	0.978471	0.220898	0.30316	0.954572	0.999175	0.0168956	0.0238538	0.319683	0.459063	0.036887	0.157943	0.298436	0.721219	0.92923	0.839081	0.0913725	0.27877	0.757279	0.454906	0.255787	0.914872	-5.4899
O=C(O[C@H]1CN[C@H](C#Cc2cc3ncnc(NCc4cccc(Oc5ccccc5)c4)c3s2)C1)N1CCOCC1	CHEMBL455433	87	nM	7.06048	555.194	9	2	4.6465	TRUE	555.66	4.6465	9	2	3	0.332171	2	97.84	0.41685	0.518312	0.751174	0.178572	0.804644	0.382329	0.775221	0.143077	0.182072	0.742773	0.940699	0.181118	0.573379	0.960688	0.99459	0.00664945	0.0154845	0.394031	0.162553	0.0335911	0.132777	0.231615	0.776832	0.867407	0.827396	0.127122	0.233328	0.652909	0.545414	0.281086	0.883137	-5.08136
Cc1ccn2ncnc(Nc3ccc4c(cnn4Cc4cccc(F)c4)c3)c12	CHEMBL427671	88	nM	7.05552	372.15	6	1	4.31842	TRUE	372.407	4.31842	6	1	4	0.510432	0	60.04	0.43993	0.87883	0.955305	0.841911	0.942791	0.397408	0.637245	0.221864	0.386988	0.719619	0.969843	0.316362	0.349736	0.946415	0.999955	0.0163738	0.0489434	0.588277	0.53185	0.0266961	0.188798	0.0676663	0.941202	0.897035	0.716266	0.128604	0.0503625	0.473337	0.10572	0.189482	0.907935	-5.33868
C=CC(=O)N1CCC([C@@H]2CCNC3C(C(N)=O)C(c4ccc(Oc5ccccc5)cc4)=NN32)CC1	CHEMBL5193128	88	nM	7.05552	473.243	6	2	2.7127	TRUE	473.577	2.7127	6	2	4	0.628684	3	100.26	0.1298	0.546054	0.629506	0.0497564	0.372554	0.139933	0.320682	0.284607	0.102308	0.868845	0.649411	0.0646193	0.293358	0.603939	0.988024	0.0286016	0.0426558	0.110984	0.0538525	0.0711382	0.218401	0.0850419	0.810133	0.693589	0.613121	0.129078	0.202359	0.113199	0.259051	0.174188	0.708618	-5.55248
CCN(CC)Cc1cccc2[nH]c(-c3n[nH]c4ncc(-c5cncc6ccccc56)cc34)nc12	CHEMBL249303	89	nM	7.05061	447.217	5	2	5.5582	TRUE	447.546	5.5582	5	2	3	0.349143	0	86.38	0.570618	0.780951	0.712531	0.904338	0.496143	0.216492	0.414662	0.456662	0.866247	0.575515	0.880805	0.291182	0.775184	0.720041	0.997444	0.0639409	0.0138883	0.769478	0.576656	0.0978323	0.0801871	0.0344276	0.857569	0.932176	0.432316	0.0753742	0.259782	0.46706	0.283704	0.510782	0.985072	-5.70593
CN1CCN(C/C=C/C(=O)Nc2cc3c(Nc4ccc(F)c(Cl)c4)ncnc3cn2)CC1	CHEMBL3921555	89	nM	7.05061	455.164	7	2	3.303	TRUE	455.925	3.303	7	2	4	0.551312	0	86.28	0.510472	0.799666	0.730616	0.229852	0.444273	0.230503	0.222196	0.264891	0.383327	0.605742	0.637004	0.313332	0.89054	0.937799	0.988529	0.0536372	0.0297528	0.385502	0.0727355	0.050649	0.0912881	0.0527016	0.84057	0.478479	0.505924	0.0946372	0.0489454	0.125201	0.259637	0.294656	0.824575	-5.1774
CNC(=O)CN1CCC(Oc2cc3c(Nc4ccc(F)c(Cl)c4F)ncnc3cc2OC)CC1	CHEMBL2408051	89	nM	7.05061	491.154	7	2	3.9028	TRUE	491.926	3.9028	7	2	4	0.484425	0	88.61	0.184289	0.890196	0.884154	0.228995	0.596365	0.214262	0.419267	0.314012	0.261062	0.805567	0.90386	0.116601	0.680739	0.940899	0.999457	0.00919752	0.00876248	0.489475	0.118694	0.0161048	0.0472618	0.0280544	0.945705	0.704102	0.489495	0.0533408	0.0340062	0.135356	0.150054	0.111739	0.872314	-4.92511
COc1ccc(I)c(Sc2nc3c(N)ncnc3n2CCNCC(C)(C)C)c1	CHEMBL381115	90	nM	7.04576	512.086	8	2	3.8086	TRUE	512.421	3.8086	8	2	3	0.367684	0	90.88	0.528442	0.908127	0.861828	0.251902	0.738571	0.105177	0.559713	0.374844	0.866622	0.854602	0.920521	0.256685	0.549605	0.53788	0.999651	0.002911	0.00745732	0.673481	0.429808	0.0310001	0.0594041	0.00688855	0.947111	0.878138	0.512269	0.0332327	0.17784	0.126148	0.024022	0.353184	0.969589	-5.33125
C[C@@H](Oc1cccc2ncnc(Nc3ccc4c(cnn4Cc4ccccn4)c3)c12)C(=O)N(C)C	CHEMBL402011	90	nM	7.04576	467.207	8	1	4.0219	TRUE	467.533	4.0219	8	1	4	0.385979	1	98.06	0.428221	0.51758	0.928052	0.216492	0.394359	0.499728	0.254342	0.198427	0.149113	0.743687	0.950112	0.362743	0.599751	0.955963	0.998493	0.00876389	0.0195892	0.337098	0.231662	0.0113904	0.0548006	0.0296202	0.933207	0.81077	0.528495	0.032241	0.0256332	0.303187	0.0939501	0.110836	0.905887	-5.23723
NCCOCc1ccn2ncnc(Nc3ccc4c(cnn4Cc4cccc(F)c4)c3)c12	CHEMBL394333	90	nM	7.04576	431.187	8	2	3.4853	TRUE	431.475	3.4853	8	2	4	0.365372	0	95.29	0.485969	0.793155	0.897351	0.457504	0.780279	0.214777	0.611484	0.288114	0.469273	0.771514	0.981467	0.34697	0.653345	0.85949	0.999442	0.0166536	0.0337995	0.525154	0.479979	0.023823	0.0748659	0.0362931	0.798855	0.8904	0.51802	0.084313	0.0365217	0.243056	0.0952574	0.15076	0.972935	-5.80292
Nc1ccccc1C#Cc1cncnc1Nc1ccc(OCc2cccc(F)c2)c(Cl)c1	CHEMBL204625	91	nM	7.04096	444.115	5	2	5.5737	TRUE	444.897	5.5737	5	2	3	0.310586	0	73.06	0.465882	0.43883	0.837654	0.675156	0.987528	0.275838	0.906414	0.0943397	0.661434	0.756446	0.980003	0.312092	0.091451	0.937815	0.999927	0.002214	0.00673259	0.849332	0.76781	0.0428416	0.134899	0.219483	0.759901	0.907349	0.746831	0.0263067	0.53395	0.7152	0.280448	0.237371	0.920821	-5.26869
CN(C)C/C=C/C(=O)Nc1cc2c(Nc3ccc(F)c(Cl)c3)ncnc2cc1OCC12COCC1C2	CHEMBL3895468	91	nM	7.04096	511.179	7	2	4.6375	TRUE	511.985	4.6375	7	2	3	0.404565	2	88.61	0.585151	0.796757	0.885207	0.186031	0.194832	0.201098	0.116732	0.237841	0.244566	0.765749	0.819297	0.302725	0.755825	0.928556	0.995343	0.0429673	0.0209054	0.37429	0.272445	0.0584798	0.0998324	0.0898343	0.818381	0.760491	0.705499	0.343627	0.181406	0.499832	0.5616	0.162034	0.827161	-5.04625
O=C(NO)[C@H]1CC2(CC2)CN[C@@H]1C(=O)N1CC[C@H](c2ccccc2)C1	CHEMBL221698	92	nM	7.03621	343.19	4	3	1.2662	TRUE	343.427	1.2662	4	3	4	0.570149	3	81.67	0.50133	0.827182	0.83676	0.0165767	0.138	0.0842017	0.015493	0.204341	0.0770555	0.705847	0.305336	0.027598	0.609286	0.113199	0.998838	0.0203087	0.031067	0.0327815	0.0214266	0.0195799	0.136769	0.00273613	0.687754	0.0202907	0.148541	0.0247781	0.0112188	0.00712136	0.0362522	0.437084	0.265037	-5.46248
COCC(=O)NCC#Cc1ccc2ncnc(Nc3ccc(OC4CCN(C(=O)CC(C)(C)C)CC4)c(C)c3)c2c1	CHEMBL230575	94	nM	7.02687	557.3	7	2	4.60192	TRUE	557.695	4.60192	7	2	3	0.390079	0	105.68	0.272214	0.532215	0.683229	0.0367819	0.559013	0.164401	0.582546	0.207676	0.0848541	0.939388	0.848538	0.127296	0.299895	0.833416	0.99717	0.00801457	0.00934201	0.275728	0.167341	0.0732033	0.113462	0.0390254	0.938041	0.936063	0.798761	0.146504	0.276788	0.330259	0.301064	0.14274	0.88276	-4.99122
Nc1ncnc(Nc2ccc3c(cnn3Cc3cccc(F)c3)c2)c1/C=N/OCc1ccccc1	CHEMBL255438	95	nM	7.02228	467.187	8	2	4.8902	TRUE	467.508	4.8902	8	2	4	0.248789	0	103.24	0.408979	0.602743	0.828677	0.295789	0.936151	0.321007	0.716574	0.155154	0.250509	0.706137	0.947014	0.508942	0.286294	0.94056	0.998285	0.00597356	0.0196113	0.682434	0.411157	0.0243194	0.11908	0.0699712	0.719853	0.91704	0.702078	0.109522	0.0770196	0.444868	0.0922066	0.193482	0.959315	-5.54742
CS(=O)(=O)CCNCCCCOc1ccc2ncnc(Nc3ccc(OCc4ccccc4)cc3)c2c1	CHEMBL15346	95	nM	7.02228	520.214	8	2	4.7456	TRUE	520.655	4.7456	8	2	3	0.22985	0	102.44	0.50006	0.551187	0.772328	0.470135	0.718351	0.386443	0.388317	0.368012	0.440773	0.808436	0.91174	0.522382	0.426826	0.899215	0.972608	0.0120607	0.0250702	0.330645	0.25102	0.0393179	0.0773496	0.0915012	0.465165	0.896893	0.596305	0.0666357	0.233114	0.326774	0.351867	0.183143	0.963174	-5.33238
Cc1ncnc(Nc2ccc(OCc3cccc(F)c3)c(Cl)c2)c1C#CCCCN1CCCC1	CHEMBL1683973	95	nM	7.02228	478.194	5	1	6.12762	TRUE	478.999	6.12762	5	1	3	0.311632	0	50.28	0.379536	0.708426	0.805062	0.180029	0.495923	0.140015	0.21371	0.480581	0.889108	0.911604	0.909689	0.361898	0.641715	0.507565	0.999151	0.00555262	0.00709478	0.267083	0.330111	0.0330561	0.0621892	0.0191235	0.83453	0.992097	0.702624	0.0129855	0.359435	0.366619	0.103785	0.351698	0.972962	-5.1327
COc1ccc2ncnc(Nc3ccc(OC4CCN(C(=O)CC(C)(C)C)CC4)c(C)c3)c2c1	CHEMBL230995	96	nM	7.01773	462.263	6	1	5.49642	TRUE	462.594	5.49642	6	1	3	0.521514	0	76.58	0.227015	0.745086	0.851311	0.105818	0.719959	0.252597	0.619399	0.316546	0.114206	0.931486	0.833321	0.175444	0.371847	0.772127	0.999582	0.00593512	0.0123395	0.532407	0.220738	0.0469964	0.122257	0.0199433	0.982206	0.911012	0.787388	0.116776	0.187759	0.420925	0.160309	0.10522	0.91766	-4.92491
CN(C)C/C=C(/F)C(=O)Nc1cc2c(Nc3ccc(F)c(Cl)c3)ncnc2cc1O[C@H]1CCOC1	CHEMBL3357642	97.1	nM	7.01278	503.154	7	2	4.6871	TRUE	503.937	4.6871	7	2	3	0.431117	1	88.61	0.636816	0.740204	0.923642	0.190846	0.201047	0.298968	0.135912	0.180591	0.129382	0.670431	0.732625	0.385523	0.779089	0.973028	0.995823	0.0145634	0.0103878	0.254069	0.312154	0.0210538	0.0487055	0.0706127	0.875441	0.77163	0.570028	0.0663264	0.0648228	0.350836	0.257306	0.246464	0.869594	-4.97314
O=C(NO)[C@H]1CC(CC(=O)N2CCCC2)CC[C@@H]1C(=O)N1CCN(c2ccccc2)CC1	CHEMBL523076	99	nM	7.00436	442.258	5	2	1.8856	TRUE	442.56	1.8856	5	2	4	0.536618	3	93.19	0.238053	0.827431	0.528241	0.00671181	0.304625	0.337042	0.118458	0.250563	0.0303714	0.893346	0.57436	0.0869996	0.351063	0.4799	0.985754	0.01583	0.0554973	0.0222317	0.0115757	0.0160108	0.102607	0.0143705	0.860235	0.207328	0.487869	0.0562878	0.0231319	0.0490061	0.14874	0.212684	0.57753	-5.21818
C[C@@H](Nc1ncnc2[nH]c(-c3ccc(NCc4ccc(C(=O)NO)cc4)cc3)cc12)c1ccccc1	CHEMBL3932057	100	nM	7	478.212	6	5	5.5291	TRUE	478.556	5.5291	6	5	3	0.147985	1	114.96	0.86475	0.423656	0.884378	0.573655	0.794628	0.336878	0.577016	0.234091	0.345479	0.671762	0.744813	0.520015	0.694551	0.948254	0.995521	0.00960336	0.017553	0.695107	0.379679	0.0777299	0.19608	0.0415839	0.744392	0.831262	0.660181	0.256749	0.121187	0.770497	0.453017	0.285541	0.93845	-5.79566
O=C(CCCCCN1CCN(Cc2ccc(-c3cc4c(NCc5ccccc5)ncnc4[nH]3)cc2)CC1)NO	CHEMBL3917105	100	nM	7	527.301	7	4	4.4204	TRUE	527.673	4.4204	7	4	3	0.12267	0	109.41	0.744563	0.763799	0.598179	0.335148	0.54676	0.176839	0.280855	0.411403	0.708718	0.768228	0.622864	0.306171	0.898376	0.687739	0.979056	0.0075286	0.00924808	0.419867	0.107422	0.0403458	0.0472115	0.00573868	0.707516	0.670616	0.451998	0.0437968	0.0243564	0.15731	0.23952	0.553545	0.987549	-5.88205
COc1ccc(I)c(Sc2nc3c(N)ncnc3n2CCNCC(C)C)c1	CHEMBL201871	100	nM	7	498.07	8	2	3.4185	TRUE	498.394	3.4185	8	2	4	0.363471	0	90.88	0.569252	0.910479	0.873598	0.497284	0.819655	0.104171	0.642899	0.374182	0.898872	0.805837	0.94735	0.232454	0.561282	0.628437	0.999762	0.00459923	0.0119039	0.772454	0.368412	0.0227345	0.0704429	0.0108674	0.92132	0.865354	0.499041	0.0507386	0.201541	0.101046	0.0428397	0.359327	0.962269	-5.34829
CCOc1cc2ncnc(Nc3ccc4c(ccn4S(=O)(=O)c4ccccc4)c3)c2cc1NC(=O)/C=C/CN1CCOCC1	CHEMBL3933895	100	nM	7	612.215	10	2	4.7907	TRUE	612.712	4.7907	10	2	3	0.214063	0	127.68	0.324597	0.391074	0.799354	0.0632473	0.577678	0.358399	0.617406	0.0950004	0.101215	0.654792	0.719527	0.508799	0.550044	0.98896	0.98517	0.00613867	0.0138092	0.236124	0.0933755	0.015129	0.0594364	0.038392	0.753247	0.836299	0.67568	0.0379119	0.104108	0.519281	0.337248	0.16123	0.90787	-4.84853
C[C@@H](Nc1ncnc2[nH]c(-c3ccc(OCCCCCCC(=O)NO)cc3)cc12)c1ccc(F)cc1	CHEMBL3914322	100	nM	7	491.233	6	4	5.7718	TRUE	491.567	5.7718	6	4	3	0.113678	1	112.16	0.820457	0.396054	0.842379	0.410618	0.814163	0.301835	0.695216	0.296468	0.494769	0.852436	0.906475	0.415276	0.695849	0.868835	0.997111	0.0075603	0.0179282	0.575422	0.267358	0.0582467	0.139889	0.0360013	0.682557	0.924043	0.613049	0.176778	0.0762275	0.562126	0.44773	0.226358	0.961232	-5.7124
COC(=O)C1=Cc2c(ncnc2Nc2ccc(Oc3cccc(C(F)(F)F)c3)c(Cl)c2)NCC1	CHEMBL2348419	100	nM	7	490.102	7	2	6.0567	TRUE	490.869	6.0567	7	2	3	0.420535	0	85.37	0.195911	0.747091	0.824156	0.85506	0.941003	0.149917	0.820384	0.179671	0.531163	0.64396	0.931033	0.257313	0.233696	0.947222	0.999679	0.00896056	0.0134691	0.62413	0.39792	0.0320203	0.0934503	0.12607	0.921661	0.918983	0.632093	0.059826	0.224068	0.774038	0.433173	0.136677	0.911128	-4.91058
C[C@@H](Nc1ncnc2[nH]c(-c3ccc(OCCCCCCC(=O)NO)cc3)cc12)c1ccccc1	CHEMBL3951620	100	nM	7	473.243	6	4	5.6327	TRUE	473.577	5.6327	6	4	3	0.120463	1	112.16	0.846181	0.486877	0.817318	0.575292	0.879546	0.272926	0.759224	0.294281	0.566483	0.825928	0.861873	0.354613	0.717913	0.852523	0.996933	0.00827456	0.0208319	0.680772	0.339253	0.0745752	0.156329	0.037974	0.763184	0.917274	0.655728	0.260094	0.119563	0.595843	0.536034	0.291687	0.956051	-5.79358
CN(C)C/C=C/C(=O)Nc1cc2c(Nc3ccc(Oc4ccccc4)cc3)ncnc2cn1	CHEMBL3977504	100	nM	7	440.196	7	2	4.617	TRUE	440.507	4.617	7	2	4	0.386402	0	92.27	0.656732	0.660988	0.842647	0.205946	0.360233	0.377301	0.181015	0.242095	0.35715	0.742612	0.506945	0.455908	0.741821	0.925556	0.965946	0.037065	0.0507322	0.533461	0.179183	0.033485	0.083921	0.0599369	0.870626	0.865732	0.598962	0.161653	0.178544	0.444099	0.402309	0.214106	0.880463	-5.26431
C[C@@H](Nc1ncnc2[nH]c(-c3ccc(CNCc4ccc(C(=O)NO)cc4)cc3)cc12)c1ccccc1	CHEMBL3968968	100	nM	7	492.227	6	5	5.2068	TRUE	492.583	5.2068	6	5	3	0.142597	1	114.96	0.845872	0.510588	0.877489	0.521949	0.71369	0.324945	0.519893	0.275956	0.474963	0.721746	0.685324	0.531846	0.807863	0.908228	0.990345	0.00944576	0.0154323	0.498023	0.272795	0.0472962	0.129262	0.0247679	0.726327	0.814573	0.446567	0.13943	0.0803419	0.61731	0.324188	0.311464	0.955029	-5.97225
C[C@@H](Nc1ncnc2[nH]c(-c3ccc(CNCCCCCCC(=O)NO)cc3)cc12)c1ccccc1	CHEMBL3901236	100	nM	7	486.274	6	5	5.3435	TRUE	486.62	5.3435	6	5	3	0.0989409	1	114.96	0.841218	0.68533	0.766169	0.557373	0.73644	0.201907	0.494442	0.37371	0.763427	0.813367	0.855409	0.357481	0.858993	0.699477	0.993464	0.0151764	0.0181719	0.512891	0.294477	0.0763012	0.100587	0.017202	0.758608	0.874282	0.425623	0.150658	0.0718101	0.388334	0.333961	0.356215	0.972928	-6.11058
O=C(NO)c1ccc(-c2cc3c(NCc4ccccc4)ncnc3[nH]2)cc1	CHEMBL3981584	100	nM	7	359.138	5	4	3.356	TRUE	359.389	3.356	5	4	4	0.323168	0	102.93	0.950251	0.707852	0.944286	0.878623	0.451636	0.347161	0.129224	0.250819	0.266564	0.504513	0.608125	0.371056	0.596178	0.972566	0.998349	0.0242494	0.0297185	0.895927	0.240874	0.0904879	0.40801	0.0176803	0.844044	0.302466	0.613439	0.481508	0.0607883	0.62123	0.486576	0.411731	0.779718	-5.46047
C[C@@H](Nc1ncnc2[nH]c(-c3ccc(CNCCCCCC(=O)NO)cc3)cc12)c1ccccc1	CHEMBL3936547	100	nM	7	472.259	6	5	4.9534	TRUE	472.593	4.9534	6	5	4	0.113171	1	114.96	0.845251	0.689761	0.772516	0.545438	0.692202	0.193134	0.447835	0.373475	0.741392	0.794168	0.839742	0.351792	0.860468	0.694486	0.99297	0.0172797	0.0184962	0.501245	0.267398	0.0800433	0.106008	0.0151572	0.749636	0.835872	0.40468	0.145366	0.064051	0.34967	0.322584	0.339318	0.969659	-6.12234
C[C@@H](Nc1ncnc2[nH]c(-c3ccc(C(=O)NO)cc3)cc12)c1ccc(F)cc1	CHEMBL3984055	100	nM	7	391.144	5	4	4.0561	TRUE	391.406	4.0561	5	4	4	0.303514	1	102.93	0.901576	0.58161	0.963118	0.672403	0.467732	0.364642	0.256689	0.225105	0.210249	0.568712	0.678436	0.524086	0.755577	0.965537	0.998411	0.0183922	0.0290239	0.705186	0.25266	0.0739693	0.223799	0.0195894	0.790877	0.327949	0.465099	0.374708	0.0358128	0.593953	0.384564	0.26089	0.829095	-5.52172
C[C@@H](Nc1ncnc2[nH]c(-c3ccc(NC(=O)CCNCC(=O)NO)cc3)cc12)c1ccccc1	CHEMBL3950023	100	nM	7	473.218	7	6	3.2216	TRUE	473.537	3.2216	7	6	3	0.117852	1	144.06	0.797669	0.501776	0.670761	0.329752	0.509274	0.211451	0.462641	0.236548	0.243628	0.611269	0.66139	0.318074	0.723314	0.859876	0.961087	0.0185198	0.0159196	0.318769	0.114088	0.0745148	0.0924967	0.0150677	0.506706	0.516734	0.337708	0.102187	0.0497112	0.251972	0.30316	0.383524	0.909889	-6.04537
C[C@@H](Nc1ncnc2[nH]c(-c3ccc(C(=O)NCCNCCC(=O)NO)cc3)cc12)c1ccccc1	CHEMBL3984573	100	nM	7	487.233	7	6	3.0129	TRUE	487.564	3.0129	7	6	3	0.108382	1	144.06	0.845827	0.57496	0.703662	0.252315	0.409568	0.179214	0.319424	0.259695	0.306149	0.644272	0.557306	0.37455	0.815825	0.811278	0.951205	0.0178411	0.0165534	0.335804	0.0888843	0.0613647	0.0936143	0.00771329	0.598869	0.520604	0.284294	0.115119	0.0275595	0.21053	0.254783	0.346049	0.93534	-6.07246
C[C@@H](Nc1ncnc2c1cc(-c1ccc(C(=O)NCCNCCCCCCC(=O)NO)cc1)n2C)c1ccccc1	CHEMBL3917093	100	nM	7	557.311	8	5	4.5837	TRUE	557.699	4.5837	8	5	3	0.082059	1	133.2	0.874112	0.567074	0.738179	0.157128	0.451655	0.173693	0.360714	0.263211	0.463318	0.86724	0.739265	0.425128	0.851023	0.730081	0.978674	0.0160952	0.0173853	0.218356	0.161875	0.0544912	0.0936025	0.0158567	0.710037	0.930602	0.424813	0.127153	0.0577181	0.251701	0.261778	0.299621	0.968714	-5.84229
O=C(NO)[C@H]1CC2(CC[C@@H]1C(=O)N1CCN(c3ccccc3)CC1)CC2	CHEMBL521719	100	nM	7	357.205	4	2	2.0371	TRUE	357.454	2.0371	4	2	4	0.641356	2	72.88	0.510938	0.888601	0.747908	0.0215786	0.284307	0.37487	0.069913	0.220788	0.0290045	0.826208	0.248537	0.108836	0.488746	0.397275	0.992775	0.0344925	0.0798534	0.0501095	0.0588889	0.0434554	0.151447	0.01931	0.841208	0.112361	0.432946	0.0620809	0.0324007	0.0666703	0.24874	0.356679	0.55188	-5.06908
C#Cc1cccc(Nc2ncnc3cc(OCCCCCCC(=O)NO)c(OCCOC)cc23)c1	CHEMBL3898444	100	nM	7	478.222	8	3	4.2146	TRUE	478.549	4.2146	8	3	4	0.136594	0	114.83	0.912601	0.523512	0.864132	0.219629	0.547031	0.244728	0.522166	0.192037	0.318855	0.828196	0.944208	0.297967	0.690377	0.891408	0.993833	0.0173984	0.054141	0.686412	0.250391	0.100934	0.144133	0.0413746	0.813874	0.890633	0.815574	0.277119	0.0562777	0.401468	0.610838	0.243333	0.913635	-5.23055
C[C@@H](Nc1ncnc2[nH]c(-c3ccc(CNCCC(=O)NO)cc3)cc12)c1ccccc1	CHEMBL3907491	100	nM	7	430.212	6	5	3.7831	TRUE	430.512	3.7831	6	5	4	0.156812	1	114.96	0.853621	0.721407	0.818076	0.577508	0.644455	0.208652	0.392251	0.347135	0.588696	0.706617	0.818466	0.354	0.834801	0.784362	0.994571	0.0215304	0.0182837	0.567983	0.196659	0.0777222	0.11647	0.0133543	0.746309	0.628321	0.405322	0.144243	0.0481283	0.286442	0.325695	0.32228	0.940443	-5.94319
C[C@@H](Nc1ncnc2[nH]c(-c3ccc(NC(=O)CCCC(=O)NO)cc3)cc12)c1ccccc1	CHEMBL3921652	100	nM	7	458.207	6	5	4.4122	TRUE	458.522	4.4122	6	5	4	0.186407	1	132.03	0.796306	0.573961	0.785782	0.517662	0.655113	0.290073	0.585706	0.24703	0.307342	0.663822	0.767499	0.349977	0.701096	0.883511	0.985804	0.0217819	0.02233	0.451983	0.201143	0.0877924	0.126662	0.0293569	0.680969	0.643954	0.440605	0.177931	0.0805013	0.416546	0.489504	0.285259	0.870957	-5.74354
C[C@@H](Nc1ncnc2[nH]c(-c3ccc(CN4CCN(CCCCCC(=O)NO)CC4)cc3)cc12)c1ccccc1	CHEMBL3938265	100	nM	7	541.317	7	4	4.9814	TRUE	541.7	4.9814	7	4	3	0.11376	1	109.41	0.713157	0.758257	0.621121	0.281481	0.514331	0.184169	0.313762	0.404448	0.710063	0.782832	0.658578	0.288507	0.90951	0.665185	0.984362	0.0070334	0.00935547	0.336695	0.104168	0.044693	0.05088	0.00535337	0.720021	0.67143	0.407034	0.0416591	0.0216417	0.162226	0.206001	0.474644	0.985739	-5.85561
C[C@@H](Nc1ncnc2[nH]c(-c3ccc(OCCCC(=O)NO)cc3)cc12)c1ccccc1	CHEMBL3977186	100	nM	7	431.196	6	4	4.4624	TRUE	431.496	4.4624	6	4	4	0.176805	1	112.16	0.876771	0.570463	0.852647	0.661597	0.855111	0.264935	0.676587	0.305177	0.548474	0.762838	0.892697	0.353966	0.711213	0.894634	0.997901	0.0106632	0.0203922	0.74475	0.301349	0.0909633	0.165791	0.0308339	0.808421	0.759246	0.657751	0.281167	0.0966528	0.533064	0.559847	0.255377	0.942316	-5.60666
C[C@@H](Nc1ncnc2[nH]c(-c3ccc(NC(=O)CCC(=O)NO)cc3)cc12)c1ccccc1	CHEMBL3961102	100	nM	7	444.191	6	5	4.0221	TRUE	444.495	4.0221	6	5	4	0.205966	1	132.03	0.796281	0.553064	0.793008	0.448038	0.486731	0.289799	0.414913	0.22041	0.248921	0.580572	0.665947	0.361004	0.695354	0.898158	0.975438	0.0283087	0.025329	0.417298	0.173013	0.0931901	0.145554	0.0224525	0.592134	0.523245	0.37934	0.185974	0.0608405	0.358341	0.436782	0.283151	0.82347	-5.78422
CN1CCN(C(=O)CC2CC[C@H](C(=O)N3CCN(c4ccccc4)CC3)[C@@H](C(=O)NO)C2)CC1	CHEMBL497222	100	nM	7	471.285	6	2	1.0372	TRUE	471.602	1.0372	6	2	4	0.492141	3	96.43	0.49286	0.710935	0.47763	0.00281183	0.137438	0.30004	0.0218486	0.207084	0.0420662	0.866157	0.246941	0.12406	0.612604	0.424865	0.827365	0.00927288	0.0331527	0.0127087	0.00627018	0.0182065	0.0599787	0.00961984	0.709538	0.13723	0.288336	0.0357531	0.0125032	0.0159642	0.114574	0.29653	0.539214	-5.42874
C[C@@H](Nc1ncnc2[nH]c(-c3ccc(NC(=O)CCCCC(=O)NO)cc3)cc12)c1ccccc1	CHEMBL3924346	100	nM	7	472.222	6	5	4.8023	TRUE	472.549	4.8023	6	5	4	0.127921	1	132.03	0.79321	0.566105	0.748164	0.374885	0.755017	0.253867	0.674233	0.228646	0.318742	0.774891	0.783081	0.324967	0.717215	0.874512	0.984433	0.0131967	0.0221739	0.493291	0.225543	0.085897	0.12433	0.0266888	0.72321	0.770421	0.509106	0.188505	0.0745254	0.446427	0.49985	0.289677	0.930701	-5.8129
C[C@@H](Nc1ncnc2[nH]c(-c3ccc(OCCCCC(=O)NO)cc3)cc12)c1ccccc1	CHEMBL3899385	100	nM	7	445.211	6	4	4.8525	TRUE	445.523	4.8525	6	4	4	0.157664	1	112.16	0.861223	0.531845	0.831121	0.654907	0.860677	0.263496	0.722984	0.319418	0.577704	0.792524	0.879684	0.340909	0.727763	0.862821	0.997534	0.0108009	0.0212204	0.691842	0.321541	0.089014	0.163104	0.0348714	0.786227	0.836507	0.638899	0.290572	0.112997	0.562345	0.567879	0.26894	0.950703	-5.71238
C[C@@H](Nc1ncnc2[nH]c(-c3ccc(OCCCCCC(=O)NO)cc3)cc12)c1ccccc1	CHEMBL3902161	100	nM	7	459.227	6	4	5.2426	TRUE	459.55	5.2426	6	4	3	0.138573	1	112.16	0.853265	0.504629	0.830361	0.602071	0.866414	0.263602	0.735995	0.311134	0.56935	0.8143	0.874141	0.345658	0.723638	0.856239	0.997177	0.00968939	0.0213835	0.683759	0.335031	0.0826891	0.16163	0.0365738	0.778932	0.88359	0.643908	0.279775	0.114118	0.584628	0.556295	0.272644	0.953066	-5.77074
C#Cc1cccc(Nc2ncnc3cc(OC)c(NC(=O)CCCCCCC(=O)NO)cc23)c1	CHEMBL3901144	100	nM	7	461.206	7	4	4.1478	TRUE	461.522	4.1478	7	4	4	0.146275	0	125.47	0.929838	0.445872	0.828462	0.16205	0.507647	0.242021	0.492218	0.141926	0.322005	0.796851	0.928417	0.312623	0.75074	0.913587	0.988286	0.0179031	0.0466498	0.649896	0.173312	0.128103	0.160874	0.0415618	0.785799	0.773179	0.749048	0.264407	0.0564691	0.377281	0.678237	0.238558	0.880793	-5.16689
C#Cc1cc(Nc2ncnc3cc(OCCOC)c(OCCCCCCCC(=O)NO)cc23)ccc1F	CHEMBL3909900	100	nM	7	510.228	8	3	4.7438	TRUE	510.566	4.7438	8	3	3	0.116224	0	114.83	0.929885	0.526345	0.885285	0.123073	0.52749	0.244442	0.546774	0.142775	0.26307	0.837249	0.949904	0.375452	0.719874	0.907828	0.994742	0.0127748	0.0363426	0.575189	0.217565	0.0668701	0.111652	0.0439416	0.74306	0.945003	0.840198	0.218381	0.0379938	0.361687	0.501811	0.21391	0.916231	-5.07089
C#Cc1cc(Nc2ncnc3cc(OC)c(OCCCCCCCC(=O)NO)cc23)ccc1F	CHEMBL3959043	100	nM	7	466.202	7	3	4.7272	TRUE	466.513	4.7272	7	3	4	0.153393	0	105.6	0.949167	0.582656	0.900234	0.222266	0.619257	0.260114	0.570272	0.142995	0.400086	0.807978	0.967802	0.348406	0.717477	0.917479	0.998062	0.013896	0.040967	0.685206	0.247565	0.0803391	0.156365	0.0498505	0.784811	0.939495	0.873953	0.252765	0.0486563	0.436191	0.550685	0.2381	0.910738	-5.05355
COC(=O)c1c(N)ncnc1Nc1ccc(OCc2ccccc2)c(Cl)c1	CHEMBL516487	100	nM	7	384.099	7	2	3.8214	TRUE	384.823	3.8214	7	2	4	0.622891	0	99.36	0.329455	0.796255	0.895198	0.925509	0.961076	0.188552	0.66794	0.119864	0.436648	0.436064	0.881422	0.115189	0.0988607	0.962917	0.999867	0.0096624	0.019397	0.831476	0.499602	0.0619606	0.237052	0.0647505	0.947161	0.38817	0.464497	0.136053	0.115862	0.402998	0.134136	0.226421	0.595214	-4.81938
C[C@@H](Nc1ncnc2[nH]c(-c3ccc(CN4CCN(CCCCC(=O)NO)CC4)cc3)cc12)c1ccccc1	CHEMBL3972249	100	nM	7	527.301	7	4	4.5913	TRUE	527.673	4.5913	7	4	3	0.128305	1	109.41	0.700105	0.749655	0.61462	0.261453	0.448283	0.174885	0.265077	0.392004	0.67474	0.76079	0.599817	0.295204	0.908975	0.657647	0.980209	0.00761611	0.0102548	0.3256	0.0865477	0.0427644	0.0518402	0.0047215	0.693137	0.60246	0.370585	0.0372112	0.018792	0.12572	0.18426	0.459251	0.983779	-5.85699
COc1cc2ncnc(Nc3ccc(OC4CCN(C(=O)CC(C)(C)C)CC4)c(C)c3)c2cc1OC	CHEMBL230994	100	nM	7	492.274	7	1	5.50502	TRUE	492.62	5.50502	7	1	3	0.465688	0	85.81	0.187536	0.747269	0.859253	0.0466193	0.639475	0.216116	0.543583	0.26133	0.0382369	0.939019	0.751605	0.155906	0.230448	0.852992	0.999055	0.00605627	0.0131202	0.49769	0.227213	0.0344729	0.0828962	0.0152828	0.978812	0.947865	0.802565	0.131647	0.139627	0.453632	0.149676	0.102047	0.909027	-4.99631
O=C(/C=C/CN1CCCC1)Nc1cc2c(Nc3ccc(Oc4ccccc4)cc3)ncnc2cn1	CHEMBL3896779	102	nM	6.9914	466.212	7	2	5.1512	TRUE	466.545	5.1512	7	2	3	0.346966	0	92.27	0.530497	0.704747	0.777268	0.262518	0.514199	0.283104	0.445209	0.284576	0.366284	0.70802	0.538774	0.357774	0.771383	0.929479	0.975649	0.0343603	0.028628	0.570599	0.157979	0.0313791	0.103136	0.0670792	0.852408	0.893235	0.770797	0.195819	0.253413	0.485824	0.531109	0.325866	0.905848	-5.23191
CN1CC(CC(=O)N2CCCCC2)C[C@H](C(=O)NO)[C@H]1C(=O)N1CCN(c2ccccc2)CC1	CHEMBL496211	102	nM	6.9914	471.285	6	2	1.1797	TRUE	471.602	1.1797	6	2	4	0.494641	3	96.43	0.151877	0.678946	0.414145	0.00254322	0.141497	0.199687	0.0296569	0.226968	0.0284083	0.854423	0.281535	0.0713255	0.515644	0.388361	0.939128	0.00684028	0.0342146	0.015362	0.00455659	0.00802868	0.0561294	0.00611344	0.865453	0.196411	0.336403	0.0155115	0.0101602	0.00771311	0.0508545	0.22855	0.623968	-5.33751
O=C(CSC(=S)N1CCCCC1)Nc1cccc(NC(=O)c2ccccn2)c1	CHEMBL4582195	104	nM	6.98297	414.118	5	2	3.7764	TRUE	414.556	3.7764	5	2	4	0.725657	0	74.33	0.212172	0.905521	0.669666	0.814269	0.96545	0.284983	0.938296	0.273098	0.45938	0.563201	0.925397	0.140792	0.356055	0.87543	0.999537	0.0188381	0.00897327	0.449681	0.339751	0.0451081	0.224307	0.139848	0.968623	0.684294	0.777692	0.191292	0.61831	0.810015	0.322229	0.666027	0.794926	-5.11212
Cc1cc(Nc2ncnc3[nH]nc(OCCN4CCC(O)CC4)c23)ccc1OCc1cccc(F)c1	CHEMBL438536	107	nM	6.97062	492.229	8	3	3.95852	TRUE	492.555	3.95852	8	3	4	0.322296	0	108.42	0.228796	0.592834	0.802907	0.287134	0.387807	0.134821	0.260206	0.48194	0.611682	0.809754	0.696997	0.244512	0.721821	0.797882	0.997548	0.0142856	0.0198561	0.43538	0.0691974	0.0107543	0.0876132	0.00879319	0.692921	0.914996	0.412552	0.0558403	0.0402382	0.303993	0.186187	0.136518	0.966263	-5.4556
COc1cc2ncnc(Nc3cccc(Cl)c3F)c2cc1OC1CCN(CC(N)=O)CC1	CHEMBL218677	107	nM	6.97062	459.147	7	2	3.503	TRUE	459.909	3.503	7	2	4	0.556977	0	102.6	0.244966	0.948515	0.920624	0.342089	0.621089	0.20375	0.381744	0.328988	0.238625	0.827999	0.867018	0.0943048	0.739256	0.839065	0.999791	0.0246935	0.016771	0.426441	0.118425	0.0350013	0.0813673	0.0399255	0.944703	0.577524	0.453851	0.117428	0.0369592	0.0867795	0.197344	0.0909919	0.866921	-5.17608
CC(=O)NNC(=O)c1csc2ncc(-c3ccc(Br)cc3)n12	CHEMBL5204417	108	nM	6.96658	377.979	5	2	2.6062	TRUE	379.239	2.6062	5	2	4	0.672521	0	75.5	0.790377	0.796219	0.951381	0.251722	0.143347	0.377952	0.0724368	0.0536116	0.0386623	0.383433	0.0748174	0.619189	0.395293	0.981643	0.992707	0.016522	0.0341561	0.492747	0.0385081	0.0110239	0.239709	0.0133783	0.787678	0.222743	0.362146	0.0902428	0.0608189	0.117311	0.0919679	0.6687	0.231319	-4.74901
O=C(O)C1CCN(Cc2ccn3ncnc(Nc4ccc5c(cnn5Cc5cccc(F)c5)c4)c23)CC1	CHEMBL234772	110	nM	6.95861	499.213	8	2	4.3066	TRUE	499.55	4.3066	8	2	4	0.344245	0	100.58	0.074774	0.810066	0.831348	0.144046	0.177718	0.187013	0.205406	0.141981	0.355864	0.445648	0.283429	0.22499	0.779128	0.856161	0.963523	0.0163218	0.0303821	0.129941	0.0744129	0.0137781	0.0708097	0.0339725	0.387303	0.348526	0.456929	0.026064	0.0148201	0.0416038	0.0381548	0.167495	0.776702	-5.93777
CCc1c(C(N)=O)cn2ncnc(Nc3ccc4c(cnn4Cc4ccccc4)c3)c12	CHEMBL194958	110	nM	6.95861	411.181	7	2	3.5322	TRUE	411.469	3.5322	7	2	4	0.444878	0	103.13	0.560914	0.8034	0.946511	0.337446	0.746333	0.439128	0.744419	0.140405	0.122741	0.657811	0.747654	0.454261	0.526977	0.951297	0.999453	0.0203597	0.0378471	0.206052	0.24278	0.029736	0.134565	0.0709304	0.86856	0.891927	0.521891	0.160216	0.0580265	0.478527	0.205801	0.191401	0.833426	-5.60927
CN(C)C1CCN(Cc2ccn3ncnc(Nc4ccc5c(cnn5Cc5cccc(F)c5)c4)c23)CC1	CHEMBL247309	110	nM	6.95861	498.266	8	1	4.536	TRUE	498.61	4.536	8	1	4	0.355586	0	66.52	0.301938	0.961225	0.784257	0.14049	0.249054	0.0998696	0.120486	0.478032	0.817063	0.725618	0.625595	0.33611	0.846533	0.675006	0.997253	0.00863989	0.0112995	0.189378	0.0993014	0.00706069	0.0342304	0.00239117	0.899062	0.903441	0.406004	0.00932319	0.0211693	0.0693658	0.0181135	0.335407	0.989909	-5.71918
CN(C)CCCOC(=O)/C=C/C(=O)Nc1ccc2ncnc(Nc3cccc(Br)c3)c2c1	CHEMBL140561	110	nM	6.95861	497.106	7	2	4.1255	TRUE	498.381	4.1255	7	2	4	0.260315	0	96.45	0.527588	0.881933	0.632668	0.470107	0.545759	0.126817	0.159756	0.238803	0.735958	0.569672	0.572182	0.330178	0.768951	0.850466	0.893386	0.109884	0.0477433	0.4043	0.108598	0.0730261	0.121222	0.0379807	0.741158	0.850908	0.50587	0.235031	0.162748	0.237925	0.434981	0.355863	0.861806	-5.39356
CN(CCO)Cc1ccn2ncnc(Nc3ccc4c(cnn4Cc4cccc(F)c4)c3)c12	CHEMBL391521	110	nM	6.95861	445.203	8	2	3.4341	TRUE	445.502	3.4341	8	2	4	0.380803	0	83.51	0.271556	0.702563	0.855711	0.333889	0.433998	0.388635	0.209382	0.385651	0.667814	0.693795	0.933134	0.491099	0.714604	0.855154	0.998281	0.0157843	0.0339631	0.266348	0.128579	0.00425058	0.0375604	0.00968458	0.79701	0.854192	0.21639	0.0121814	0.0111333	0.194772	0.0367401	0.119528	0.974545	-5.46946
OCc1ccn2ncnc(Nc3ccc4c(cnn4Cc4cccc(F)c4)c3)c12	CHEMBL246276	110	nM	6.95861	388.145	7	2	3.5023	TRUE	388.406	3.5023	7	2	4	0.481701	0	80.27	0.220113	0.599677	0.896698	0.553705	0.735678	0.416153	0.485924	0.16977	0.239115	0.577749	0.914808	0.290179	0.303088	0.960325	0.999757	0.0174294	0.0531428	0.495183	0.455718	0.0115109	0.11088	0.0573178	0.828098	0.725619	0.502397	0.0604022	0.0231938	0.473111	0.115446	0.101528	0.89843	-5.49452
NC(=O)COCc1ccn2ncnc(Nc3ccc4c(cnn4Cc4cccc(F)c4)c3)c12	CHEMBL246694	110	nM	6.95861	445.166	8	2	3.0119	TRUE	445.458	3.0119	8	2	4	0.379736	0	112.36	0.440345	0.858466	0.921096	0.331976	0.549241	0.285233	0.486382	0.133132	0.20219	0.734534	0.919097	0.292291	0.653864	0.94274	0.998741	0.037491	0.0444157	0.134645	0.178911	0.0250391	0.0735071	0.0623847	0.777839	0.74986	0.409892	0.0791119	0.0179014	0.114015	0.158061	0.0888599	0.860033	-5.62805
Cc1ccn2ncnc(Nc3ccc4c(cnn4Cc4ccccc4)c3)c12	CHEMBL429827	110	nM	6.95861	354.159	6	1	4.17932	TRUE	354.417	4.17932	6	1	4	0.525914	0	60.04	0.561376	0.882154	0.944661	0.884245	0.919013	0.403924	0.601786	0.231276	0.413823	0.671637	0.947807	0.313832	0.334447	0.949846	0.99992	0.0197784	0.0416835	0.702587	0.556329	0.042486	0.227823	0.102264	0.937309	0.845259	0.774595	0.224992	0.112043	0.61672	0.200052	0.299787	0.885248	-5.44075
O=C(NCCN1CCCC1)Nc1cc2c(Nc3ccc(F)c(Cl)c3)ncnc2cc1O[C@H]1CCOC1	CHEMBL3092308	112	nM	6.95078	514.19	7	3	4.5509	TRUE	514.989	4.5509	7	3	3	0.405163	1	100.64	0.395757	0.738191	0.832199	0.285485	0.190398	0.196685	0.112158	0.488786	0.369235	0.62803	0.786313	0.263996	0.876438	0.898073	0.990158	0.0246756	0.0202155	0.364217	0.0807181	0.0392952	0.0888795	0.0337679	0.748841	0.620227	0.460153	0.0899327	0.067716	0.273039	0.401821	0.161726	0.884183	-4.95554
CC(C)N(C)CC#CC(=O)Nc1ccc2ncnc(Nc3cccc(Br)c3)c2c1	CHEMBL91811	113	nM	6.94692	451.101	5	2	4.418	TRUE	452.356	4.418	5	2	4	0.561392	0	70.15	0.56173	0.913763	0.833785	0.800948	0.651065	0.373777	0.371357	0.446498	0.787399	0.716543	0.774727	0.540873	0.771679	0.875387	0.996971	0.0386497	0.0221279	0.64379	0.236626	0.029599	0.121475	0.0839744	0.918884	0.848907	0.534991	0.118071	0.222067	0.45671	0.27965	0.424969	0.931257	-5.0983
Fc1cccc(COc2ccc(Nc3ncnc4cc(-c5cccs5)sc34)cc2Cl)c1	CHEMBL473427	113	nM	6.94692	467.033	6	1	7.5349	TRUE	467.978	7.5349	6	1	3	0.280029	0	47.04	0.486275	0.546348	0.836963	0.774918	0.852737	0.387161	0.645759	0.108394	0.344049	0.609825	0.762638	0.33842	0.0720078	0.970345	0.999785	0.0251834	0.0242681	0.852348	0.517867	0.0486787	0.322436	0.292927	0.71832	0.967891	0.919684	0.165591	0.589768	0.80327	0.505455	0.318081	0.829009	-5.17471
CN[C@@H]1C[C@H]2O[C@@](C)([C@@H]1OC)n1c3ccccc3c3c4c(c5c6ccccc6n2c5c31)C(=O)NC4	CHEMBL388978	115	nM	6.9393	466.2	6	2	4.354	TRUE	466.541	4.354	6	2	4	0.405842	4	69.45	0.859374	0.574749	0.722377	0.636751	0.326754	0.142767	0.197091	0.0896902	0.0450433	0.721237	0.637299	0.0771446	0.516061	0.975009	0.997043	0.116512	0.0145878	0.589673	0.646336	0.115255	0.0730966	0.277233	0.830598	0.91842	0.73391	0.276088	0.30158	0.632668	0.731949	0.57764	0.898508	-4.93723
COCCOCC#CC(=O)Nc1ccc2ncnc(Nc3cccc(Br)c3)c2c1	CHEMBL327838	116	nM	6.93554	454.064	6	2	3.7408	TRUE	455.312	3.7408	6	2	4	0.417271	0	85.37	0.718906	0.858559	0.848171	0.729177	0.753866	0.258164	0.555225	0.258389	0.209477	0.726508	0.825022	0.268301	0.58835	0.967443	0.999234	0.0183852	0.0143163	0.807392	0.371923	0.0343758	0.0970427	0.121035	0.934348	0.886212	0.728868	0.21061	0.254939	0.493435	0.463047	0.338341	0.923153	-5.01076
COCC1CCCN1CC#CC(=O)Nc1ccc2ncnc(Nc3cccc(Br)c3)c2c1	CHEMBL93784	117	nM	6.93181	493.111	6	2	4.1886	TRUE	494.393	4.1886	6	2	4	0.50083	1	79.38	0.547553	0.909361	0.818022	0.687492	0.718723	0.257073	0.556277	0.39343	0.601078	0.763132	0.92163	0.275208	0.866983	0.920832	0.999328	0.0224111	0.0113017	0.643883	0.18547	0.0230256	0.0857166	0.086804	0.936624	0.900689	0.680166	0.129932	0.236749	0.361167	0.369727	0.402021	0.957194	-5.037
COc1ccc(/N=C/c2c(N)ncnc2Nc2ccc3c(cnn3Cc3cccc(F)c3)c2)cc1	CHEMBL525725	118	nM	6.92812	467.187	8	2	5.0987	TRUE	467.508	5.0987	8	2	3	0.322967	0	103.24	0.581374	0.421748	0.944228	0.254851	0.738258	0.363022	0.49457	0.156476	0.120382	0.728791	0.922159	0.508862	0.400423	0.969371	0.999146	0.00485846	0.0235772	0.787022	0.384758	0.0183804	0.0911905	0.0545825	0.72905	0.903302	0.722388	0.269852	0.057561	0.489764	0.224331	0.110116	0.959776	-5.26516
CCNC(=O)CN1CCC(Oc2cc3c(Nc4cccc(Cl)c4F)ncnc3cc2OC)CC1	CHEMBL2408046	120	nM	6.92082	487.179	7	2	4.1538	TRUE	487.963	4.1538	7	2	4	0.49301	0	88.61	0.182331	0.901912	0.865467	0.245224	0.709741	0.225063	0.418517	0.375688	0.375569	0.867787	0.937602	0.108422	0.685351	0.891686	0.999796	0.00638526	0.00862445	0.527234	0.0940057	0.0127503	0.0585777	0.0182553	0.96734	0.809094	0.544104	0.0340691	0.0344563	0.102287	0.0923056	0.110452	0.893284	-4.97829
CN1CCN(Cc2ccn3ncnc(Nc4ccc5c(cnn5Cc5cccc(F)c5)c4)c23)CC1	CHEMBL232082	120	nM	6.92082	470.234	8	1	3.7574	TRUE	470.556	3.7574	8	1	4	0.407759	0	66.52	0.320564	0.921983	0.842203	0.300047	0.496991	0.371853	0.194262	0.482215	0.702015	0.73012	0.961878	0.423447	0.86917	0.894252	0.999098	0.00773192	0.0182288	0.174016	0.0859787	0.00686158	0.0250012	0.00719811	0.905076	0.882247	0.397664	0.00578542	0.0118793	0.0719566	0.0230068	0.256497	0.989496	-5.34127
Fc1cccc(Cn2ncc3cc(Nc4ncnn5ccc(COCC6CCNCC6)c45)ccc32)c1	CHEMBL246072	120	nM	6.92082	485.234	8	2	4.5262	TRUE	485.567	4.5262	8	2	4	0.33627	0	81.3	0.304084	0.792764	0.850827	0.184599	0.572273	0.14059	0.466431	0.301368	0.487069	0.783344	0.929757	0.275774	0.75597	0.783489	0.999341	0.0129279	0.0226165	0.321784	0.2954	0.0218997	0.0790724	0.0214571	0.836604	0.937152	0.661679	0.0541186	0.0589414	0.229399	0.0879784	0.175517	0.969778	-5.81109
CN1CCCN(Cc2ccn3ncnc(Nc4ccc5c(cnn5Cc5cccc(F)c5)c4)c23)CC1	CHEMBL234577	120	nM	6.92082	484.25	8	1	4.1475	TRUE	484.583	4.1475	8	1	4	0.390727	0	66.52	0.538581	0.923788	0.874285	0.33689	0.329442	0.232987	0.11188	0.396371	0.813204	0.712289	0.952281	0.436022	0.902227	0.844667	0.998551	0.0108809	0.0178437	0.21203	0.142938	0.00955086	0.0321187	0.00650419	0.907081	0.918508	0.384579	0.0152274	0.0179574	0.0967382	0.037523	0.280143	0.988709	-5.47519
CS(=O)(=O)N1CCCN(Cc2ccn3ncnc(Nc4ccc5c(cnn5Cc5cccc(F)c5)c4)c23)CC1	CHEMBL400413	120	nM	6.92082	548.212	9	1	3.4773	TRUE	548.648	3.4773	9	1	3	0.332422	0	100.66	0.307467	0.877126	0.802665	0.440172	0.800291	0.323988	0.672176	0.287664	0.751672	0.826846	0.985044	0.323052	0.679941	0.942229	0.999494	0.0150058	0.0310914	0.194615	0.258402	0.0158495	0.0562611	0.0273654	0.932749	0.867601	0.630164	0.0166983	0.0222465	0.364103	0.0907532	0.21578	0.982359	-5.58566
FC(F)(F)c1ccccc1Oc1ccc(Nc2ncnc3cc[nH]c23)cc1Cl	CHEMBL1922904	120	nM	6.92082	404.065	4	2	6.166	TRUE	404.779	6.166	4	2	3	0.426922	0	62.83	0.217444	0.823605	0.875001	0.984838	0.94655	0.346576	0.615572	0.279631	0.441531	0.560852	0.796141	0.318441	0.14296	0.96369	0.999945	0.013322	0.011666	0.880187	0.703682	0.123047	0.268104	0.233344	0.903684	0.854712	0.81134	0.122168	0.269017	0.912992	0.55349	0.172636	0.909803	-5.02622
CN(CCO)C(=O)COc1cccc2ncnc(Nc3ccc(OCc4ccccn4)c(Cl)c3)c12	CHEMBL258353	120	nM	6.92082	493.152	8	2	3.8303	TRUE	493.951	3.8303	8	2	4	0.342808	0	109.7	0.266237	0.271559	0.866557	0.402838	0.551522	0.47338	0.347712	0.148014	0.158804	0.673175	0.854372	0.286993	0.361243	0.952489	0.998227	0.00865677	0.0137854	0.464144	0.209635	0.0067412	0.0511032	0.0557855	0.888226	0.839511	0.443737	0.0157276	0.0522338	0.32284	0.1032	0.141611	0.880307	-5.38681
O=C(CO)NC1CCN(Cc2ccn3ncnc(Nc4ccc5c(cnn5Cc5cccc(F)c5)c4)c23)CC1	CHEMBL247513	120	nM	6.92082	528.24	9	3	3.0829	TRUE	528.592	3.0829	9	3	3	0.283776	0	112.61	0.129727	0.630452	0.547955	0.0573796	0.328703	0.107478	0.250807	0.210822	0.50372	0.701982	0.717051	0.24739	0.656828	0.816921	0.994852	0.0156641	0.0180843	0.162997	0.0724891	0.00683693	0.0497246	0.00365948	0.643678	0.744886	0.455384	0.0126522	0.0122841	0.131701	0.0537127	0.108063	0.948634	-5.72723
Fc1cccc(COc2ccc(Nc3ncnc4cc(-c5ccc[nH]5)sc34)cc2Cl)c1	CHEMBL473436	121	nM	6.91721	450.072	5	2	6.8015	TRUE	450.926	6.8015	5	2	3	0.298313	0	62.83	0.420954	0.493643	0.833016	0.903274	0.93475	0.388498	0.793404	0.184663	0.507765	0.628131	0.895565	0.274856	0.0872404	0.962525	0.999865	0.0129461	0.0156757	0.901952	0.527433	0.0547339	0.320314	0.216478	0.725753	0.941461	0.863658	0.203526	0.490756	0.848748	0.478093	0.263561	0.885906	-5.38846
NNC(=O)c1csc2nc(CN3CCOCC3)c(-c3ccc(Br)cc3)n12	CHEMBL5204650	121	nM	6.91721	435.036	7	2	2.261	TRUE	436.335	2.261	7	2	4	0.372518	0	84.89	0.843819	0.818833	0.89974	0.50758	0.645565	0.19155	0.581177	0.155772	0.253813	0.43759	0.853624	0.490407	0.795464	0.901108	0.998916	0.0102642	0.0114369	0.700608	0.288697	0.0457	0.177181	0.021966	0.786485	0.624947	0.446347	0.103498	0.142538	0.170583	0.12085	0.644856	0.880653	-4.92125
OCc1ccc(-c2cc3ncnc(Nc4ccc(OCc5cccc(F)c5)c(Cl)c4)c3s2)o1	CHEMBL473428	122	nM	6.91364	481.066	7	2	6.5587	TRUE	481.936	6.5587	7	2	3	0.273847	0	80.41	0.283584	0.227815	0.784982	0.735148	0.906862	0.355445	0.820611	0.0697386	0.318026	0.597607	0.790586	0.281893	0.0317215	0.968473	0.999786	0.0120184	0.0192331	0.769042	0.593963	0.016882	0.209445	0.241141	0.720876	0.971863	0.878613	0.0696847	0.519853	0.89777	0.421195	0.195936	0.902432	-5.27498
COCOCC#CC(=O)Nc1ccc2ncnc(Nc3cccc(Br)c3)c2c1	CHEMBL93049	122	nM	6.91364	440.048	6	2	3.6983	TRUE	441.285	3.6983	6	2	4	0.344902	0	85.37	0.79026	0.875778	0.833294	0.760669	0.666982	0.253621	0.426055	0.277057	0.253046	0.702927	0.773617	0.252829	0.64332	0.963986	0.99919	0.0285301	0.0162553	0.805994	0.392381	0.0590765	0.128414	0.112145	0.941904	0.856184	0.705735	0.231391	0.254207	0.46278	0.469719	0.373822	0.90576	-4.97496
O=C(C#CCN1CCSCC1)Nc1ccc2ncnc(Nc3cccc(Br)c3)c2c1	CHEMBL328977	124	nM	6.90658	481.057	6	2	4.1266	TRUE	482.407	4.1266	6	2	4	0.545574	0	70.15	0.434654	0.886066	0.844472	0.904125	0.769077	0.445865	0.654545	0.437964	0.487281	0.55147	0.884465	0.378167	0.739459	0.968344	0.999224	0.0298792	0.0117177	0.540304	0.358354	0.0307471	0.118049	0.195735	0.882396	0.831574	0.782072	0.132893	0.229311	0.677403	0.504459	0.560662	0.935221	-5.2501
CCC(=O)Nc1cc2c(Nc3ccc4c(ccn4Cc4ccccc4)c3)ncnc2cc1OC	CHEMBL3977326	124	nM	6.90658	451.201	6	2	5.7335	TRUE	451.53	5.7335	6	2	3	0.330095	0	81.07	0.52175	0.463683	0.805974	0.623535	0.890578	0.304872	0.646925	0.194825	0.42201	0.758039	0.89628	0.262122	0.210943	0.956169	0.998484	0.0259875	0.026844	0.802064	0.443912	0.0481853	0.155401	0.0920786	0.8685	0.966999	0.817605	0.220367	0.328317	0.764075	0.636328	0.192691	0.942678	-5.13057
C=CC(=O)Nc1nc2c(Nc3ccc(F)c(Cl)c3)ncnc2cc1OC	CHEMBL31816	125	nM	6.90309	373.074	6	2	3.694	TRUE	373.775	3.694	6	2	4	0.662845	0	89.03	0.610731	0.653669	0.917116	0.78726	0.394911	0.178119	0.372737	0.120193	0.177769	0.556234	0.774522	0.0960407	0.224335	0.991512	0.999736	0.0914017	0.0347743	0.929042	0.458951	0.105406	0.174131	0.312546	0.940978	0.603743	0.870428	0.628669	0.293138	0.749569	0.81692	0.343972	0.584247	-4.72997
CCNC(=O)Nc1ccc2ncnc(Nc3ccc(OCc4cccc(F)c4)c(Cl)c3)c2c1	CHEMBL3633932	126	nM	6.89963	465.137	5	3	5.8863	TRUE	465.916	5.8863	5	3	3	0.316665	0	88.17	0.260105	0.50176	0.881247	0.652267	0.889507	0.494897	0.725113	0.19703	0.375333	0.684581	0.885499	0.390677	0.237153	0.972484	0.999184	0.00744806	0.0171706	0.788182	0.235933	0.0192219	0.130538	0.120725	0.802527	0.863324	0.701133	0.0575392	0.234429	0.718985	0.408314	0.118508	0.842921	-5.12512
CC(=O)N1CCN(CCOc2n[nH]c3ncnc(Nc4ccc(OCc5ccccn5)c(Cl)c4)c23)CC1	CHEMBL258270	129	nM	6.88941	522.189	9	2	3.2668	TRUE	522.997	3.2668	9	2	3	0.340804	0	121.39	0.251969	0.467732	0.736	0.2683	0.6395	0.265444	0.46626	0.349674	0.373847	0.790116	0.850876	0.21399	0.699687	0.912665	0.989533	0.0149422	0.017024	0.365579	0.0705808	0.0589058	0.119425	0.0396583	0.753896	0.618304	0.552986	0.0464721	0.0456838	0.148973	0.278033	0.235258	0.875614	-5.63767
C[C@H](c1ccccc1)n1ncc2cc(Nc3ncnn4ccc(COC[C@@H]5CNCCO5)c34)ccc21	CHEMBL394495	130	nM	6.88606	483.238	9	2	3.9369	TRUE	483.576	3.9369	9	2	4	0.345525	2	90.53	0.430508	0.635017	0.832749	0.133962	0.527374	0.14173	0.410287	0.151451	0.200962	0.661322	0.968063	0.177262	0.659247	0.899754	0.998073	0.00918643	0.0156337	0.323116	0.455475	0.0416512	0.102482	0.0460277	0.807895	0.777106	0.639983	0.0607822	0.0881994	0.420759	0.295364	0.225746	0.945697	-5.44108
C[C@H](Oc1cccc2ncnc(Nc3ccc4c(cnn4Cc4cscn4)c3)c12)C(=O)N(C)C	CHEMBL256996	130	nM	6.88606	473.163	9	1	4.0834	TRUE	473.562	4.0834	9	1	4	0.380234	1	98.06	0.395898	0.441082	0.910683	0.428505	0.687736	0.568007	0.493999	0.210005	0.150387	0.672305	0.983575	0.333153	0.362801	0.975796	0.999118	0.0070582	0.0151091	0.466915	0.271028	0.0113471	0.0734109	0.0650804	0.870922	0.825082	0.618342	0.0489249	0.0472578	0.395533	0.142612	0.127888	0.858803	-5.26509
NCCCCOCc1ccn2ncnc(Nc3ccc4c(cnn4Cc4cccc(F)c4)c3)c12	CHEMBL245867	130	nM	6.88606	459.218	8	2	4.2655	TRUE	459.529	4.2655	8	2	4	0.303049	0	95.29	0.515787	0.75958	0.876785	0.301459	0.757746	0.180418	0.636785	0.263065	0.541952	0.830569	0.978913	0.373931	0.652027	0.789065	0.999295	0.0160047	0.0312119	0.459849	0.48882	0.0274184	0.078445	0.0332432	0.775295	0.958326	0.565547	0.075371	0.0492935	0.309499	0.107756	0.155713	0.977812	-5.86961
Cc1ccc(Oc2ccc(Nc3ncnc4cccc(OCC(=O)N(C)CCO)c34)cc2C)cn1	CHEMBL255337	130	nM	6.88606	473.206	8	2	4.00704	TRUE	473.533	4.00704	8	2	4	0.375328	0	109.7	0.365806	0.280219	0.88234	0.198667	0.343029	0.510012	0.243785	0.201885	0.171122	0.770248	0.900853	0.333056	0.511508	0.918513	0.998255	0.0118387	0.0246731	0.474133	0.148992	0.00718685	0.0480019	0.028155	0.881892	0.905443	0.401371	0.0230788	0.03756	0.361711	0.0872145	0.106882	0.934498	-5.14192
O=C1Cc2ccc(Oc3ccc(Nc4ncnc5ccn(CCO)c45)cc3Cl)cc2N1	CHEMBL2048792	130	nM	6.88606	435.11	7	3	4.1075	TRUE	435.871	4.1075	7	3	4	0.42109	0	101.3	0.270892	0.338669	0.78982	0.474046	0.639425	0.290718	0.576586	0.104965	0.259662	0.606669	0.793665	0.188627	0.287083	0.974542	0.99843	0.0234325	0.0340384	0.576286	0.38623	0.0215045	0.136353	0.0861601	0.73141	0.840878	0.597999	0.0660232	0.134369	0.639879	0.482335	0.178119	0.821222	-5.42058
CCc1c(C(=O)NC)cn2ncnc(Nc3ccc4c(cnn4Cc4ccccc4)c3)c12	CHEMBL197689	130	nM	6.88606	425.196	7	2	3.7929	TRUE	425.496	3.7929	7	2	4	0.432054	0	89.14	0.392509	0.694989	0.876806	0.319794	0.793822	0.437548	0.772689	0.175621	0.222788	0.673363	0.849383	0.445585	0.428722	0.953612	0.999094	0.0111203	0.0227088	0.354407	0.281736	0.0144053	0.103478	0.052047	0.870423	0.937035	0.617989	0.0988282	0.0688692	0.609656	0.167303	0.226195	0.915259	-5.59649
CNC(=O)c1cc(Oc2ccc(NC(=O)Nc3ccc(Cl)c(C(F)(F)F)c3)cc2)ccn1	CHEMBL1336	131	nM	6.88273	464.086	4	3	5.5497	TRUE	464.831	5.5497	4	3	3	0.46134	0	92.35	0.363983	0.723846	0.915958	0.415755	0.772491	0.495219	0.676521	0.221859	0.182484	0.65898	0.487096	0.687967	0.377128	0.944748	0.997206	0.00536039	0.0168654	0.323967	0.148566	0.0133105	0.104173	0.0720959	0.789335	0.796676	0.521824	0.0331362	0.173733	0.857247	0.408183	0.176247	0.792743	-5.178
CC(=O)Nc1cccc(Oc2cc(Nc3ccc(OCc4cccc(F)c4)c(Cl)c3)ncn2)c1	CHEMBL1928946	135	nM	6.86967	478.121	6	2	6.3424	TRUE	478.911	6.3424	6	2	3	0.307032	0	85.37	0.262623	0.474343	0.899625	0.275061	0.913028	0.443294	0.791528	0.12334	0.306248	0.79242	0.819292	0.493726	0.197369	0.963914	0.998321	0.00349028	0.0122124	0.485311	0.182244	0.0171168	0.113291	0.0721175	0.726042	0.870903	0.614294	0.0226606	0.216072	0.601682	0.26756	0.104403	0.808246	-5.28536
O=C(CC1CN[C@H](C(=O)N2CCC(c3ccccc3)C2)[C@@H](C(=O)NO)C1)NCCCCCNC(=O)OCc1ccccc1	CHEMBL445717	137	nM	6.86328	593.321	7	5	2.7052	TRUE	593.725	2.7052	7	5	3	0.136227	4	149.1	0.643589	0.604593	0.502608	0.0690957	0.71269	0.1031	0.523279	0.284945	0.44244	0.852227	0.957882	0.081798	0.659785	0.499524	0.986237	0.00667655	0.0128971	0.0594014	0.0119575	0.0152373	0.0788059	0.0174894	0.752904	0.656721	0.508592	0.0800304	0.0301122	0.0485299	0.18471	0.355488	0.884416	-5.74428
Fc1cccc(Cn2ncc3cc(Nc4ncnn5ccc(COCC6CNCCOC6)c45)ccc32)c1	CHEMBL395591	140	nM	6.85387	501.229	9	2	3.7626	TRUE	501.566	3.7626	9	2	3	0.334613	1	90.53	0.355882	0.709457	0.872519	0.193655	0.65526	0.198647	0.520248	0.249731	0.293257	0.789225	0.981523	0.263733	0.651655	0.906845	0.999274	0.00929775	0.0200785	0.269111	0.303274	0.0183659	0.0700701	0.0370036	0.83704	0.91674	0.680848	0.0514822	0.0456516	0.249143	0.12224	0.136537	0.963047	-5.65635
Cc1ncnc(Nc2ccc(OCc3cccc(F)c3)c(Cl)c2)c1C	CHEMBL1683955	140	nM	6.85387	357.104	4	1	5.20854	TRUE	357.816	5.20854	4	1	3	0.680624	0	47.04	0.507746	0.817855	0.975448	0.928446	0.96148	0.474727	0.407536	0.316433	0.415503	0.810053	0.785271	0.356018	0.0644542	0.863257	0.999982	0.00424478	0.0265158	0.724633	0.45348	0.0601769	0.285768	0.0327781	0.966153	0.538958	0.562335	0.0967269	0.155059	0.553993	0.117107	0.208779	0.627852	-4.88775
COc1ccc(I)c(Sc2nc3c(N)ncnc3n2CCCNC(C)(C)C)c1	CHEMBL199532	140	nM	6.85387	512.086	8	2	3.9511	TRUE	512.421	3.9511	8	2	3	0.366087	0	90.88	0.6187	0.914969	0.904597	0.148841	0.455365	0.0727824	0.205388	0.384556	0.893252	0.865744	0.763185	0.294785	0.645542	0.506617	0.999253	0.00336496	0.0085641	0.47941	0.309975	0.0262147	0.0634067	0.00378281	0.940396	0.84193	0.361267	0.0170655	0.0907113	0.0824859	0.0174014	0.352028	0.968521	-5.38157
Fc1cccc(COc2ccc(Nc3ncncc3C#Cc3cccnc3)cc2Cl)c1	CHEMBL438440	140	nM	6.85387	430.1	5	1	5.3865	TRUE	430.87	5.3865	5	1	3	0.43022	0	59.93	0.310726	0.396516	0.865932	0.690261	0.973691	0.326228	0.905082	0.117971	0.57038	0.747101	0.97715	0.252747	0.170773	0.929855	0.999935	0.00310443	0.0087601	0.793011	0.731739	0.0421224	0.135548	0.174132	0.867467	0.848523	0.789816	0.0372531	0.53996	0.741268	0.299217	0.196783	0.850857	-5.12579
C[C@@H](Oc1cccc2ncnc(Nc3ccc4c(cnn4Cc4cscn4)c3)c12)C(N)=O	CHEMBL257196	140	nM	6.85387	445.132	9	2	3.4805	TRUE	445.508	3.4805	9	2	4	0.393312	1	120.84	0.503118	0.610486	0.960116	0.643166	0.716437	0.505296	0.591573	0.188227	0.115534	0.573504	0.959009	0.327543	0.463191	0.969177	0.999438	0.0143118	0.0227859	0.464032	0.257098	0.0290019	0.126039	0.13658	0.802898	0.650358	0.571816	0.145021	0.0684034	0.36211	0.318141	0.117713	0.792488	-5.53925
c1ccc2c(-c3cnc4[nH]nc(-c5nc6ccccc6[nH]5)c4c3)cncc2c1	CHEMBL391437	140	nM	6.85387	362.128	4	2	4.7164	TRUE	362.396	4.7164	4	2	4	0.466928	0	83.14	0.51355	0.626672	0.799905	0.984925	0.769577	0.310395	0.675448	0.335269	0.539199	0.433782	0.957478	0.0969234	0.343223	0.958858	0.999911	0.0862128	0.0213498	0.916251	0.686934	0.157963	0.216723	0.223155	0.927635	0.874125	0.783471	0.323623	0.343724	0.73351	0.692432	0.466991	0.955936	-5.48037
C[C@H](Oc1cccc2ncnc(Nc3ccc4c(cnn4Cc4ccccn4)c3)c12)C(=O)N1CCOCC1	CHEMBL413997	140	nM	6.85387	509.218	9	1	3.7925	TRUE	509.57	3.7925	9	1	3	0.353179	1	107.29	0.268725	0.43813	0.895932	0.0735205	0.42533	0.35989	0.490198	0.11215	0.0468085	0.666092	0.912275	0.238804	0.619314	0.980375	0.99801	0.00571728	0.0152781	0.281924	0.227536	0.0138348	0.0714096	0.062388	0.887264	0.743831	0.707696	0.0395089	0.034524	0.394645	0.197216	0.122016	0.890378	-5.10448
O=C(COc1cccc2ncnc(Nc3ccc(OCc4ccccn4)c(Cl)c3)c12)N1CCOCC1	CHEMBL258354	140	nM	6.85387	505.152	8	1	4.2384	TRUE	505.962	4.2384	8	1	3	0.379489	0	98.7	0.248652	0.50115	0.907133	0.202639	0.665031	0.348307	0.526567	0.107223	0.0504798	0.685459	0.818918	0.265981	0.4549	0.983135	0.997905	0.00580218	0.0118685	0.436629	0.236401	0.0141413	0.0702356	0.114681	0.900027	0.821562	0.767247	0.041148	0.0836688	0.306484	0.182582	0.200732	0.842431	-5.14129
Cc1ccc(-c2c(CN3CCCCC3)nc3scc(C(=O)O)n23)cc1	CHEMBL5194543	146	nM	6.83565	355.135	5	1	4.05532	TRUE	355.463	4.05532	5	1	4	0.766797	0	57.84	0.403077	0.77267	0.848912	0.0803728	0.121551	0.181506	0.1188	0.160385	0.422088	0.228819	0.025916	0.16338	0.690367	0.698846	0.968543	0.0124021	0.0255207	0.113515	0.0337081	0.0179278	0.152375	0.0390541	0.381783	0.286279	0.289669	0.0246598	0.0410452	0.0266463	0.0138225	0.61579	0.497884	-5.09394
NNC(=O)c1c(N)ncnc1Nc1ccc(OCc2ccccc2)c(Cl)c1	CHEMBL511478	146	nM	6.83565	384.11	7	4	2.6383	TRUE	384.827	2.6383	7	4	4	0.291897	0	128.18	0.873127	0.585169	0.95858	0.61841	0.852768	0.325706	0.657976	0.0863057	0.310532	0.446195	0.846431	0.706026	0.351694	0.956752	0.999609	0.00391189	0.022019	0.920372	0.440217	0.053184	0.257868	0.0346541	0.831802	0.233568	0.61231	0.127297	0.177411	0.529436	0.168934	0.404058	0.645432	-5.22839
C=CC(=O)Nc1cccc(-c2c(-c3ccc(N4CCN(C)CC4)cc3)[nH]c3ncn(C)c(=O)c23)c1	CHEMBL4785221	146	nM	6.83565	468.227	6	2	3.4719	TRUE	468.561	3.4719	6	2	4	0.438258	0	86.26	0.271358	0.432581	0.690133	0.18788	0.198436	0.371125	0.15336	0.245409	0.0436916	0.694671	0.398377	0.342243	0.625044	0.964587	0.936116	0.0389843	0.0270701	0.21554	0.10818	0.0317403	0.0553626	0.0311464	0.591778	0.774464	0.378889	0.136618	0.0953174	0.374637	0.359863	0.226242	0.892571	-4.97573
CS(=O)(=O)CCNCCCCOc1ccc2ncnc(Nc3ccc(S(=O)(=O)c4ccccc4)cc3)c2c1	CHEMBL460732	147	nM	6.83268	554.166	9	2	3.9994	TRUE	554.694	3.9994	9	2	3	0.235769	0	127.35	0.186838	0.515696	0.7673	0.203626	0.517921	0.44358	0.386199	0.304016	0.248267	0.792059	0.874694	0.637492	0.343004	0.939785	0.920524	0.0113137	0.0261177	0.0735907	0.0755207	0.0138678	0.0366566	0.0247926	0.496824	0.654907	0.380991	0.0150194	0.0537387	0.180392	0.161821	0.0866153	0.933533	-5.41624
Clc1cc(Nc2ncnc3[nH]nc(OCCN4CCCCCO4)c23)ccc1OCc1ccccn1	CHEMBL270448	148	nM	6.82974	495.179	9	2	4.5202	TRUE	495.971	4.5202	9	2	4	0.345895	0	110.31	0.620142	0.488108	0.925071	0.523063	0.74832	0.15081	0.642197	0.257133	0.316976	0.782585	0.922756	0.290736	0.826106	0.945083	0.99904	0.00525861	0.00779886	0.617827	0.276655	0.0430027	0.082878	0.0559055	0.872821	0.739845	0.75102	0.118244	0.0661322	0.411576	0.498376	0.242742	0.889527	-5.78183
COC[C@@H](C)Oc1cc2ncnc(Nc3ccc(F)c(Cl)c3)c2cc1NC(=O)/C=C/CN(C)C	CHEMBL4577883	148.3	nM	6.82886	487.179	7	2	4.6359	TRUE	487.963	4.6359	7	2	4	0.402711	1	88.61	0.626218	0.685394	0.891979	0.133315	0.2795	0.227523	0.095917	0.229	0.230109	0.829625	0.834781	0.374497	0.637391	0.921382	0.991946	0.0285041	0.0214454	0.532288	0.23444	0.047977	0.0628984	0.046998	0.900263	0.822872	0.539509	0.101995	0.0941891	0.257548	0.308774	0.157055	0.846605	-4.94907
CN(C)C/C=C(\F)C(=O)Nc1cc2c(Nc3ccc(F)c(Cl)c3)ncnc2cc1O[C@H]1CCOC1	CHEMBL3357641	149.4	nM	6.82565	503.154	7	2	4.6871	TRUE	503.937	4.6871	7	2	3	0.431117	1	88.61	0.671346	0.765146	0.933527	0.184759	0.178119	0.29103	0.113043	0.189357	0.119324	0.677704	0.73051	0.406135	0.795865	0.970021	0.996127	0.0140148	0.0103225	0.237974	0.308066	0.0181999	0.0458824	0.0610353	0.883427	0.756665	0.541683	0.0583065	0.052985	0.315391	0.224789	0.245146	0.873578	-4.93606
Cc1ncnc(Nc2ccc(OCc3cccc(F)c3)c(Cl)c2)c1C#CCCCN1CCOCC1	CHEMBL1683961	150	nM	6.82391	494.188	6	1	5.36402	TRUE	494.998	5.36402	6	1	3	0.335668	0	59.51	0.391514	0.616995	0.809191	0.104303	0.819901	0.146232	0.542717	0.264768	0.649404	0.892232	0.965407	0.34279	0.626981	0.731314	0.999258	0.00365778	0.00826715	0.38406	0.421906	0.0461071	0.0743465	0.0354497	0.790918	0.986983	0.782372	0.0214126	0.384764	0.533601	0.168577	0.27306	0.952326	-4.87312
O=C1NCc2c(Oc3ccc(Nc4ncnc5ccn(CCO)c45)cc3Cl)cccc21	CHEMBL2048793	150	nM	6.82391	435.11	7	3	3.8563	TRUE	435.871	3.8563	7	3	4	0.424901	0	101.3	0.3434	0.369376	0.838662	0.579821	0.704328	0.367592	0.674086	0.122753	0.215234	0.574113	0.746697	0.220047	0.304449	0.979064	0.999392	0.0129727	0.0207146	0.593156	0.375161	0.0138928	0.124208	0.0771924	0.823434	0.855121	0.556509	0.05316	0.136805	0.669646	0.343956	0.220401	0.85362	-5.41068
COCC(=O)NCC#Cc1ccc2ncnc(Nc3ccc(OC4CCN(C(=O)C5CCC5)CC4)c(C)c3)c2c1	CHEMBL230574	150	nM	6.82391	541.269	7	2	3.96582	TRUE	541.652	3.96582	7	2	3	0.415976	0	105.68	0.304267	0.673472	0.719249	0.0652922	0.440509	0.169445	0.434074	0.264459	0.119021	0.897262	0.87287	0.0878229	0.342635	0.845897	0.998414	0.014312	0.0143779	0.233971	0.132953	0.078372	0.194781	0.0437207	0.883028	0.887008	0.764283	0.343592	0.308563	0.387603	0.424435	0.128564	0.794724	-5.11326
CO/N=C/c1c(N)ncnc1Nc1ccc(OCc2ccccc2)c(Cl)c1	CHEMBL257815	153	nM	6.81531	383.115	7	2	4.0151	TRUE	383.839	4.0151	7	2	4	0.472422	0	94.65	0.603007	0.677339	0.887946	0.846348	0.962342	0.190797	0.533364	0.132229	0.447939	0.57967	0.87147	0.34621	0.0930057	0.896176	0.999483	0.00540326	0.0259387	0.877065	0.497963	0.0636108	0.240805	0.0852954	0.832951	0.649479	0.686172	0.237125	0.35506	0.38169	0.14326	0.356139	0.686157	-5.05284
CCC(=O)Nc1cc2c(Nc3ccc4c(cnn4Cc4ccccc4)c3)ncnc2cc1OC	CHEMBL3948084	153	nM	6.81531	452.196	7	2	5.1285	TRUE	452.518	5.1285	7	2	3	0.355612	0	93.96	0.357559	0.383389	0.865384	0.42032	0.797321	0.336742	0.696126	0.159417	0.176434	0.738245	0.894359	0.317739	0.255532	0.973145	0.998584	0.0122612	0.0257963	0.706988	0.351875	0.0238236	0.0961508	0.0564114	0.884049	0.900022	0.764528	0.167697	0.116724	0.663001	0.50321	0.140194	0.935983	-5.19892
OCc1nc(C#Cc2cncnc2Nc2ccc(OCc3cccc(F)c3)c(Cl)c2)cs1	CHEMBL205047	160	nM	6.79588	466.067	7	2	4.9403	TRUE	466.925	4.9403	7	2	4	0.391681	0	80.16	0.228939	0.20535	0.817993	0.679832	0.967676	0.391131	0.925923	0.100603	0.434943	0.665727	0.9638	0.285754	0.0694684	0.945793	0.999801	0.00295625	0.00804644	0.838755	0.633674	0.016526	0.0974303	0.217147	0.76979	0.924864	0.767761	0.0464493	0.573978	0.861688	0.358864	0.16009	0.836653	-5.05199
C[C@@H](Oc1cccc2ncnc(Nc3ccc4c(cnn4Cc4cscn4)c3)c12)C(=O)N1CCOCC1	CHEMBL404327	160	nM	6.79588	515.174	10	1	3.854	TRUE	515.599	3.854	10	1	3	0.348322	1	107.29	0.256875	0.424944	0.898865	0.202237	0.648758	0.39499	0.654232	0.138334	0.0484363	0.600589	0.967642	0.223599	0.429144	0.98682	0.999085	0.00452189	0.0110347	0.383658	0.22537	0.012558	0.0910351	0.0944814	0.825056	0.777974	0.752712	0.0503957	0.0492228	0.392603	0.223919	0.140846	0.868416	-5.16777
NCCCCNC(=O)CC1CN[C@H](C(=O)N2CCC(c3ccccc3)C2)[C@@H](C(=O)NO)C1	CHEMBL568356	162	nM	6.79048	445.269	6	5	0.3474	TRUE	445.564	0.3474	6	5	4	0.211309	4	136.79	0.454936	0.593743	0.513338	0.0061365	0.111447	0.0285896	0.0199638	0.186486	0.253577	0.745015	0.723778	0.0525574	0.631485	0.0887011	0.974698	0.0123757	0.0179076	0.0269335	0.00627822	0.0171893	0.0743069	0.00194571	0.556386	0.0852303	0.18486	0.0173669	0.00906555	0.00278678	0.0313041	0.400374	0.60425	-6.35048
CC(C)N(CC#CC(=O)Nc1ccc2ncnc(Nc3cccc(Br)c3)c2c1)C(C)C	CHEMBL92961	162	nM	6.79048	479.132	5	2	5.1966	TRUE	480.41	5.1966	5	2	3	0.475185	0	70.15	0.561671	0.908915	0.828214	0.702372	0.647514	0.345906	0.414016	0.43459	0.820623	0.744527	0.701409	0.659357	0.785468	0.803273	0.993525	0.0236751	0.0136394	0.504716	0.2101	0.0254506	0.0886193	0.0526394	0.905946	0.860514	0.427269	0.0604754	0.180901	0.404566	0.169402	0.523624	0.950908	-5.13408
NCCCCCNC(=O)CC1CN[C@H](C(=O)N2CCC(c3ccccc3)C2)[C@@H](C(=O)NO)C1	CHEMBL495797	162	nM	6.79048	459.285	6	5	0.7375	TRUE	459.591	0.7375	6	5	4	0.198832	4	136.79	0.451029	0.581822	0.488539	0.0078854	0.139706	0.0295112	0.0318143	0.204403	0.310036	0.758842	0.811949	0.0506615	0.64484	0.0943104	0.976228	0.0125648	0.0175044	0.0302495	0.00783651	0.0204468	0.0757285	0.00271785	0.605969	0.136136	0.224436	0.0216666	0.0119792	0.00456691	0.0380081	0.410999	0.674768	-6.35578
O=C(CCCCCn1cc(-c2ccc3ncnc(Nc4ccc(F)c(Cl)c4)c3c2)nn1)NO	CHEMBL3920583	165.5	nM	6.7812	469.143	8	3	4.4902	TRUE	469.908	4.4902	8	3	4	0.187605	0	117.85	0.898053	0.576516	0.873908	0.332989	0.748882	0.153054	0.484477	0.12518	0.428101	0.832359	0.956308	0.442841	0.824368	0.929479	0.998731	0.0112134	0.0113072	0.55102	0.371029	0.0792195	0.129863	0.0607189	0.809369	0.825365	0.723129	0.120059	0.0659479	0.387265	0.474806	0.310123	0.88111	-5.59948
COC1CNCCN(Cc2ccn3ncnc(Nc4ccc5c(cnn5Cc5cccc(F)c5)c4)c23)C1	CHEMBL392774	170	nM	6.76955	500.245	9	2	3.4302	TRUE	500.582	3.4302	9	2	3	0.354255	1	84.54	0.51664	0.826402	0.835221	0.247744	0.55555	0.152405	0.369575	0.321697	0.706125	0.749527	0.978764	0.300999	0.839134	0.840134	0.999399	0.0105705	0.0124197	0.328031	0.179386	0.0164692	0.0501792	0.0157413	0.859699	0.891279	0.468155	0.0262303	0.0304987	0.140487	0.0924801	0.223181	0.985756	-5.60279
Fc1cccc(Cn2ncc3cc(Nc4ncnn5ccc(COC[C@H]6CCCNC6)c45)ccc32)c1	CHEMBL246073	170	nM	6.76955	485.234	8	2	4.5262	TRUE	485.567	4.5262	8	2	4	0.33627	1	81.3	0.40533	0.803502	0.871033	0.193447	0.477292	0.116139	0.360074	0.320565	0.557908	0.763248	0.958142	0.244677	0.793174	0.744453	0.999533	0.0131183	0.0241699	0.320978	0.33644	0.0204815	0.0781581	0.0169954	0.856965	0.936326	0.634087	0.0482941	0.0548969	0.226098	0.076858	0.186234	0.9746	-5.78254
NS(=O)(=O)c1ccc(CCn2c(SCC(=O)Nc3ccc(Cl)cc3)nc3ccccc3c2=O)cc1	CHEMBL5199520	170	nM	6.76955	528.069	7	2	3.6708	TRUE	529.043	3.6708	7	2	3	0.265444	0	124.15	0.0698247	0.771099	0.842265	0.659656	0.954678	0.722077	0.959598	0.139056	0.650772	0.665298	0.976028	0.513519	0.196759	0.964844	0.998755	0.0223277	0.0377622	0.0700902	0.135731	0.00776167	0.0607642	0.175353	0.726551	0.883664	0.385161	0.0123742	0.0452682	0.476728	0.0438229	0.144297	0.851166	-5.93248
O=C(NO)[C@H]1C[C@H](CC(=O)N2CCCCC2)CC[C@@H]1C(=O)N1CCN(c2ccccc2)CC1	CHEMBL496629	170	nM	6.76955	456.274	5	2	2.2757	TRUE	456.587	2.2757	5	2	4	0.523828	3	93.19	0.183169	0.906273	0.437232	0.00894494	0.385478	0.240454	0.148653	0.32158	0.0757689	0.890047	0.644185	0.0513645	0.410996	0.390348	0.994276	0.0110074	0.0370572	0.0320909	0.0205592	0.0178092	0.104567	0.0119178	0.892002	0.299026	0.542503	0.0666731	0.0428886	0.075702	0.146939	0.240703	0.660712	-5.24252
COc1cn2ncnc(Nc3ccc4c(cnn4Cc4cccc(F)c4)c3)c2c1CN1CCCNCC1	CHEMBL247711	170	nM	6.76955	500.245	9	2	3.8139	TRUE	500.582	3.8139	9	2	3	0.351565	0	84.54	0.491846	0.7528	0.891497	0.330439	0.499299	0.234495	0.314322	0.441982	0.659381	0.768821	0.972368	0.363227	0.804345	0.896392	0.999256	0.0114955	0.0162787	0.429819	0.169787	0.0137318	0.0467604	0.01935	0.842217	0.910961	0.537781	0.0422651	0.0338681	0.253029	0.154907	0.179173	0.984561	-5.48792
CC(C)CO/N=C/c1c(N)ncnc1Nc1ccc2c(cnn2Cc2cccc(F)c2)c1	CHEMBL430031	173	nM	6.76195	433.203	8	2	4.346	TRUE	433.491	4.346	8	2	4	0.316368	0	103.24	0.404509	0.666246	0.872425	0.211554	0.888351	0.287245	0.648879	0.205496	0.203792	0.744279	0.961369	0.453021	0.342579	0.90419	0.998826	0.00716078	0.0308963	0.668588	0.454107	0.0306174	0.0998266	0.0388982	0.866824	0.846423	0.638717	0.127603	0.0582793	0.335079	0.0802135	0.161356	0.939306	-5.40383
CCOc1cc2ncnc(Nc3ccc(NS(=O)(=O)c4ccccc4)cc3)c2cc1NC(=O)/C=C/CN1CCOCC1	CHEMBL3957416	174	nM	6.75945	588.215	9	3	4.3998	TRUE	588.69	4.3998	9	3	3	0.217983	0	134.78	0.209902	0.406054	0.816664	0.159252	0.563517	0.49014	0.679814	0.126834	0.167273	0.588511	0.768352	0.467	0.486791	0.99	0.98307	0.0111873	0.0289394	0.129962	0.0734012	0.0121934	0.0557957	0.0485264	0.721689	0.723	0.546637	0.0286052	0.0968058	0.538233	0.295859	0.163069	0.908067	-5.13347
O=C(CCCCCCn1cc(-c2ccc3ncnc(Nc4cccc(Cl)c4F)c3c2)nn1)NO	CHEMBL3930620	174.9	nM	6.75721	483.159	8	3	4.8803	TRUE	483.935	4.8803	8	3	4	0.166981	0	117.85	0.881052	0.617982	0.863107	0.279407	0.75301	0.152685	0.563609	0.0996934	0.422904	0.831129	0.967791	0.39898	0.776452	0.929437	0.999148	0.0117162	0.0123374	0.487497	0.409408	0.0641023	0.125514	0.0729765	0.817521	0.921011	0.767866	0.128327	0.0546373	0.462171	0.424146	0.310438	0.897935	-5.66098
COc1cc2ncnc(N[C@@H](C)c3ccc(F)cc3)c2cc1OCCCCCCC(=O)NO	CHEMBL598406	175	nM	6.75696	456.217	7	3	4.7853	TRUE	456.518	4.7853	7	3	4	0.204478	1	105.6	0.834496	0.702945	0.920666	0.247218	0.791053	0.282627	0.647016	0.223214	0.356775	0.883096	0.965261	0.328534	0.690022	0.845305	0.999104	0.00794976	0.0192915	0.505825	0.213308	0.0271562	0.0705849	0.0222199	0.904039	0.922074	0.686685	0.106913	0.0330972	0.294035	0.297502	0.175523	0.949088	-5.40416
O=C(CCCCCCn1cc(-c2ccc3ncnc(Nc4ccc(F)c(Cl)c4)c3c2)nn1)NO	CHEMBL3957055	176.7	nM	6.75276	483.159	8	3	4.8803	TRUE	483.935	4.8803	8	3	4	0.166981	0	117.85	0.897035	0.565076	0.861298	0.318186	0.798724	0.156086	0.579332	0.127716	0.475806	0.843275	0.962699	0.438597	0.816642	0.919943	0.998827	0.00971719	0.0120897	0.543743	0.400083	0.0782593	0.134877	0.0677741	0.780851	0.898893	0.745797	0.127848	0.0805893	0.459778	0.480936	0.308672	0.894987	-5.61219
CCCN(CC#CC(=O)Nc1ccc2ncnc(Nc3cccc(Br)c3)c2c1)CCC	CHEMBL328245	177	nM	6.75203	479.132	5	2	5.1998	TRUE	480.41	5.1998	5	2	3	0.434063	0	70.15	0.576743	0.907821	0.766557	0.751793	0.704856	0.333931	0.546292	0.417117	0.770298	0.708608	0.782147	0.591952	0.76288	0.828395	0.996256	0.0314637	0.0132641	0.526317	0.256492	0.0293431	0.106913	0.117636	0.860544	0.937328	0.609578	0.120766	0.336744	0.511803	0.33636	0.570986	0.951087	-5.13652
COc1cc2ncc(C#N)c(Nc3cccc(Br)c3)c2cc1NC(=O)C#CCN(C)C	CHEMBL116853	180	nM	6.74473	477.08	6	2	4.12468	TRUE	478.35	4.12468	6	2	4	0.536579	0	90.28	0.552059	0.681381	0.877053	0.258913	0.375614	0.25941	0.489984	0.288231	0.141687	0.741892	0.623995	0.437222	0.499938	0.957397	0.995011	0.0244123	0.0131246	0.703943	0.249563	0.0192181	0.0424241	0.068622	0.897044	0.905997	0.627786	0.0954155	0.179844	0.82758	0.650487	0.319642	0.934137	-5.02272
COc1ccc(I)c(Sc2nc3c(N)ncnc3n2CCCNC(C)C)c1	CHEMBL381521	180	nM	6.74473	498.07	8	2	3.561	TRUE	498.394	3.561	8	2	4	0.362685	0	90.88	0.672463	0.919926	0.906815	0.357598	0.638145	0.0759823	0.293444	0.381643	0.932761	0.813621	0.867829	0.278143	0.666828	0.62599	0.999597	0.00468446	0.012577	0.631341	0.299546	0.0197857	0.0654386	0.00581624	0.920345	0.873208	0.385238	0.028704	0.10731	0.073481	0.0300554	0.407638	0.969538	-5.40424
CCOC(=O)c1cn2ncnc(Nc3ccc4c(cnn4Cc4ccccc4)c3)c2c1CC	CHEMBL196925	180	nM	6.74473	440.196	8	1	4.61	TRUE	440.507	4.61	8	1	4	0.372071	0	86.34	0.116377	0.688128	0.824126	0.649819	0.950433	0.279271	0.933416	0.0879909	0.268475	0.609613	0.913738	0.207587	0.201696	0.94733	0.999582	0.0161874	0.0354466	0.366251	0.260409	0.0234192	0.101692	0.105884	0.939202	0.950767	0.598306	0.0970385	0.088529	0.572949	0.168751	0.187832	0.870299	-5.4143
CC(=O)NC1CCN(Cc2ccn3ncnc(Nc4ccc5c(cnn5Cc5cccc(F)c5)c4)c23)CC1	CHEMBL247512	180	nM	6.74473	512.245	8	2	4.1105	TRUE	512.593	4.1105	8	2	3	0.341068	0	92.38	0.190572	0.854694	0.670247	0.0958362	0.500446	0.1298	0.393093	0.324756	0.642916	0.793495	0.828264	0.278173	0.745529	0.794957	0.997613	0.0116294	0.0135263	0.153736	0.0841431	0.0107884	0.0626928	0.0055425	0.826925	0.859936	0.553484	0.0221276	0.0190708	0.111156	0.0397722	0.182227	0.960802	-5.76857
NC(=O)COc1cccc2ncnc(Nc3ccc(OCc4ccccn4)c(Cl)c3)c12	CHEMBL272929	180	nM	6.74473	435.11	7	2	3.8649	TRUE	435.871	3.8649	7	2	4	0.431683	0	112.25	0.562607	0.751522	0.969882	0.697956	0.647272	0.414499	0.334462	0.191695	0.145451	0.669702	0.799474	0.36076	0.498164	0.959124	0.998967	0.0226245	0.0273541	0.511234	0.245719	0.0327888	0.108366	0.114968	0.897063	0.662263	0.540123	0.125111	0.100107	0.276617	0.252294	0.147935	0.728865	-5.58989
C=CC(=O)Nc1nc2c(Nc3ccc(F)c(Cl)c3)ncnc2cc1OCCCN1CCN(C)CC1	CHEMBL284326	182	nM	6.73993	499.19	8	2	3.7017	TRUE	499.978	3.7017	8	2	4	0.339723	0	95.51	0.60177	0.766533	0.691884	0.207563	0.314769	0.149677	0.221125	0.325629	0.557729	0.682271	0.7954	0.297261	0.889503	0.923144	0.983261	0.0536715	0.0246825	0.403747	0.153384	0.0672895	0.0753733	0.0598994	0.815959	0.812209	0.633567	0.14776	0.0656627	0.235705	0.44957	0.33425	0.923811	-5.07262
CCN1CCN(CC#CC(=O)Nc2ccc3ncnc(Nc4cccc(Br)c4)c3c2)CC1	CHEMBL92356	183	nM	6.73755	492.127	6	2	3.7153	TRUE	493.409	3.7153	6	2	4	0.528422	0	73.39	0.513785	0.907283	0.771522	0.63124	0.464476	0.410979	0.21923	0.51286	0.645425	0.585379	0.799292	0.471696	0.892063	0.936079	0.991684	0.0213311	0.0157292	0.315455	0.076829	0.0140158	0.0511635	0.0371117	0.864065	0.775614	0.457141	0.0371366	0.0665768	0.146358	0.133748	0.496761	0.958965	-5.02353
Cc1ccc(Oc2ccc(Nc3ncnc4[nH]nc(OCCN5CCC(O)CC5)c34)cc2Cl)cn1	CHEMBL255170	184	nM	6.73518	495.179	9	3	4.08112	TRUE	495.971	4.08112	9	3	4	0.331595	0	121.31	0.181687	0.457833	0.820618	0.236199	0.246803	0.0918479	0.170466	0.385262	0.489795	0.766245	0.49859	0.211797	0.790193	0.809404	0.995362	0.0133115	0.0187307	0.575767	0.065298	0.0159936	0.109913	0.0116741	0.730697	0.661962	0.349464	0.0373832	0.0428466	0.266741	0.220449	0.148857	0.901324	-5.68015
Nc1ncnc2c1c(-c1ccc3nc(Cc4ccccc4)[nH]c3c1)nn2[C@H]1CC[C@H](N2CCOCC2)CC1	CHEMBL249496	186	nM	6.73049	508.27	8	2	4.3585	TRUE	508.63	4.3585	8	2	3	0.36289	0	110.77	0.504539	0.699958	0.845913	0.147926	0.502052	0.123809	0.388295	0.159773	0.28792	0.656214	0.782827	0.217288	0.707327	0.838011	0.994729	0.0117907	0.0167324	0.557379	0.594558	0.0607924	0.100206	0.0218506	0.688288	0.701813	0.548149	0.229909	0.0892628	0.629512	0.399641	0.310741	0.979038	-5.45769
C=CC(=O)Nc1nc2c(Nc3ccc(F)c(Cl)c3)ncnc2cc1OCCCN1CCOCC1	CHEMBL31656	189	nM	6.72354	486.158	8	2	3.7865	TRUE	486.935	3.7865	8	2	4	0.347813	0	101.5	0.625482	0.690366	0.775719	0.155371	0.290463	0.0914753	0.334123	0.175203	0.299132	0.593441	0.786012	0.197612	0.829628	0.953767	0.989295	0.0556336	0.0202068	0.559026	0.353786	0.0966262	0.104343	0.173957	0.741522	0.790122	0.757114	0.294745	0.177661	0.550205	0.724862	0.352461	0.88561	-4.91745
CO/N=C/c1c(N)ncnc1Nc1ccc2c(cnn2Cc2ccc(F)cc2)c1	CHEMBL256527	189	nM	6.72354	391.156	8	2	3.3198	TRUE	391.41	3.3198	8	2	4	0.386033	0	103.24	0.517447	0.729568	0.898735	0.446759	0.776622	0.271718	0.334778	0.219001	0.230842	0.611483	0.942862	0.416521	0.353162	0.931233	0.998607	0.0119833	0.0414112	0.655825	0.374638	0.0320562	0.143226	0.0311197	0.80495	0.600499	0.49981	0.176728	0.0436382	0.233689	0.0959851	0.195609	0.894948	-5.38868
C#Cc1cccc(Nc2ncnc3ccc(OCCCOP(N)(=O)N(CCCl)CCCl)cc23)c1	CHEMBL4079768	190	nM	6.72125	521.115	6	2	4.9866	TRUE	522.373	4.9866	6	2	3	0.140232	1	102.6	0.946013	0.815669	0.885256	0.703828	0.58309	0.252885	0.471011	0.522872	0.643038	0.684801	0.982174	0.561245	0.884557	0.676266	0.996911	0.0524927	0.033426	0.580363	0.407818	0.254329	0.237746	0.125451	0.676375	0.717577	0.688345	0.242101	0.146114	0.467248	0.500977	0.340154	0.938017	-5.22832
CS(=O)(=O)CCNC1CCN(Cc2ccn3ncnc(Nc4ccc5c(cnn5Cc5cccc(F)c5)c4)c23)CC1	CHEMBL246898	190	nM	6.72125	576.243	10	2	3.6086	TRUE	576.702	3.6086	10	2	3	0.259654	0	109.45	0.275685	0.89587	0.680317	0.155744	0.470381	0.174165	0.293174	0.43419	0.71449	0.750697	0.923263	0.407543	0.785288	0.818248	0.995914	0.00807767	0.00886709	0.0883692	0.0633816	0.0118035	0.0351259	0.0076892	0.702681	0.701396	0.509123	0.0123266	0.0224734	0.0839709	0.0418226	0.201562	0.978523	-5.84265
NC1CCN(Cc2ccn3ncnc(Nc4ccc5c(cnn5Cc5ccncc5)c4)c23)CC1	CHEMBL247916	190	nM	6.72125	453.239	9	2	3.189	TRUE	453.554	3.189	9	2	4	0.407031	0	102.19	0.193756	0.871841	0.801087	0.276549	0.374306	0.0847743	0.430058	0.359717	0.684751	0.581553	0.860996	0.146522	0.860733	0.602003	0.999081	0.0111754	0.0146003	0.436734	0.22744	0.0168476	0.0602752	0.00353295	0.767972	0.425794	0.245347	0.0166685	0.0322147	0.0934778	0.0481309	0.288907	0.969148	-6.20703
CN1CC(CC(=O)N2CCCC2)C[C@H](C(=O)NO)[C@H]1C(=O)N1CCN(c2ccccc2)CC1	CHEMBL496018	194	nM	6.7122	457.269	6	2	0.7896	TRUE	457.575	0.7896	6	2	4	0.501427	3	96.43	0.159741	0.679757	0.414969	0.00172588	0.09996	0.191756	0.020297	0.196268	0.0182521	0.844363	0.150403	0.067007	0.480929	0.364958	0.92197	0.00756967	0.0368346	0.0123027	0.00365982	0.00704762	0.056887	0.00495279	0.830568	0.134717	0.29071	0.0140599	0.00812823	0.00476141	0.0453706	0.232709	0.563628	-5.35303
CS(=O)(=O)CCNc1nc(-c2ccc3ncnc(Nc4ccc(F)c(Cl)c4)c3c2)cs1	CHEMBL157084	200	nM	6.69897	477.05	8	2	4.7459	TRUE	477.974	4.7459	8	2	4	0.396251	0	96.87	0.424597	0.642717	0.872439	0.918153	0.697706	0.474479	0.269659	0.42053	0.297037	0.558706	0.978675	0.491197	0.381018	0.978033	0.998589	0.0548655	0.0265329	0.654377	0.431658	0.0665912	0.11096	0.298532	0.708538	0.777177	0.691137	0.163087	0.234592	0.543078	0.407877	0.195169	0.879364	-5.02739
Clc1cc(Nc2ncnc3nn4ccccc4c23)ccc1OCc1ccccc1	CHEMBL181742	200	nM	6.69897	401.104	6	1	5.2535	TRUE	401.857	5.2535	6	1	3	0.435223	0	64.34	0.473949	0.459686	0.901992	0.821219	0.883415	0.287604	0.632691	0.106055	0.254324	0.506042	0.584291	0.408463	0.156808	0.973791	0.999593	0.023865	0.0250268	0.79541	0.479458	0.066064	0.324244	0.379766	0.879425	0.861257	0.898937	0.229045	0.410799	0.622139	0.439663	0.291392	0.659583	-5.15062
CCOC(=O)C1=C(N)N(c2cccnc2)C2=C(C(=O)CCC2)C1c1cc2ccccc2n2nnnc12	CHEMBL3325477	200	nM	6.69897	481.186	10	1	3.0168	TRUE	481.516	3.0168	10	1	4	0.437344	1	128.6	0.122019	0.854609	0.760233	0.322189	0.922588	0.122454	0.968271	0.0326349	0.236602	0.571157	0.967654	0.0608977	0.139582	0.954994	0.999952	0.0376871	0.0406642	0.294925	0.267077	0.0162251	0.0487478	0.174698	0.958651	0.775718	0.619219	0.150055	0.0791832	0.7555	0.338649	0.166009	0.484411	-5.30593
CCOC(=O)c1cn2ncnc(Nc3ccc4c(cnn4Cc4ccccc4)c3)c2c1C	CHEMBL196738	200	nM	6.69897	426.18	8	1	4.35602	TRUE	426.48	4.35602	8	1	4	0.406244	0	86.34	0.132103	0.699005	0.862743	0.68726	0.937069	0.315159	0.907665	0.114589	0.250165	0.6222	0.933205	0.206763	0.22942	0.961813	0.999677	0.0156417	0.0385574	0.506063	0.212317	0.0213034	0.10699	0.0840466	0.94538	0.916575	0.586204	0.116819	0.0707085	0.562979	0.160608	0.172444	0.865657	-5.39277
O=C1CN(Cc2ccn3ncnc(Nc4ccc5c(cnn5Cc5cccc(F)c5)c4)c23)CCN1	CHEMBL265629	200	nM	6.69897	470.198	8	2	2.9418	TRUE	470.512	2.9418	8	2	4	0.396551	0	92.38	0.153946	0.777012	0.738683	0.187361	0.832442	0.421681	0.779896	0.287959	0.333674	0.800692	0.963978	0.278753	0.602656	0.961126	0.998984	0.00875053	0.019246	0.226334	0.109062	0.010745	0.0561879	0.0318483	0.848769	0.818016	0.673086	0.0226239	0.0184085	0.227865	0.098375	0.17515	0.951748	-5.52728
Cc1ccc(Oc2ccc(Nc3ncnc4cccc(O[C@H](C)C(=O)NCCO)c34)cc2C)cn1	CHEMBL271668	200	nM	6.69897	473.206	8	3	4.05334	TRUE	473.533	4.05334	8	3	4	0.333148	1	118.49	0.389306	0.223512	0.882104	0.135728	0.420351	0.431929	0.408049	0.157778	0.176361	0.75027	0.902103	0.387103	0.516618	0.918359	0.997702	0.00991758	0.0211246	0.518822	0.210898	0.00988004	0.0673645	0.0427187	0.811423	0.876773	0.522913	0.0285551	0.0589836	0.51194	0.156337	0.104041	0.91823	-5.30359
Nc1nc(Nc2ccc(S(N)(=O)=O)cc2)nn1C(=O)c1sccc1-n1cccc1	CHEMBL483082	200	nM	6.69897	429.068	10	3	1.792	TRUE	429.487	1.792	10	3	4	0.437336	0	150.92	0.166562	0.498467	0.721788	0.407163	0.375286	0.471598	0.617251	0.138769	0.219476	0.283845	0.627962	0.461789	0.54863	0.986913	0.939058	0.051606	0.0728107	0.0842771	0.0830217	0.0280041	0.0840885	0.0414933	0.459365	0.196493	0.142038	0.0460037	0.0245426	0.278932	0.165601	0.242192	0.639061	-5.74402
Fc1cccc(COc2ccc(Nc3ncnc4sc(-c5ccc[nH]5)cc34)cc2Cl)c1	CHEMBL475600	203	nM	6.6925	450.072	5	2	6.8015	TRUE	450.926	6.8015	5	2	3	0.298313	0	62.83	0.453821	0.404318	0.836162	0.804375	0.897979	0.423947	0.717761	0.170652	0.338977	0.644946	0.786532	0.373244	0.122836	0.963993	0.999702	0.0114757	0.0181017	0.88489	0.415856	0.0797127	0.355938	0.211165	0.664061	0.893544	0.824989	0.254656	0.487493	0.796486	0.537917	0.234081	0.846755	-5.29096
CO/N=C/c1c(N)ncnc1Nc1ccc(F)c(Cl)c1	CHEMBL255490	204	nM	6.69037	295.064	6	2	2.5752	TRUE	295.705	2.5752	6	2	4	0.668649	0	85.42	0.388927	0.821046	0.943376	0.801679	0.634399	0.201475	0.120823	0.1662	0.133386	0.423038	0.803036	0.233397	0.101125	0.921941	0.999819	0.0185357	0.0437433	0.900564	0.297744	0.0650881	0.228119	0.0207418	0.847983	0.0960089	0.465479	0.213144	0.123769	0.234328	0.0918986	0.388482	0.246249	-4.66415
CN(C)CCCNC(=O)/C=C/C(=O)Nc1ccc2ncnc(Nc3cccc(Br)c3)c2c1	CHEMBL345109	207	nM	6.68403	496.122	6	3	3.6985	TRUE	497.397	3.6985	6	3	4	0.308182	0	99.25	0.606445	0.864695	0.652162	0.141597	0.280351	0.125864	0.0659345	0.193112	0.488576	0.612603	0.301725	0.419409	0.676929	0.780657	0.837505	0.0764241	0.0419462	0.321657	0.10895	0.063799	0.119033	0.0124575	0.644965	0.757076	0.451	0.1408	0.105184	0.161214	0.30346	0.328708	0.862955	-5.60467
O=C(NO)[C@H]1CC(CC(=O)N2CCOCC2)CC[C@@H]1C(=O)N1CCN(c2ccccc2)CC1	CHEMBL496825	208	nM	6.68194	458.253	6	2	1.122	TRUE	458.559	1.122	6	2	4	0.506545	3	102.42	0.450517	0.791022	0.63185	0.0029478	0.224642	0.282941	0.0814863	0.104759	0.0135027	0.860856	0.528339	0.0971304	0.461887	0.613462	0.972028	0.0163412	0.0492286	0.0244872	0.0167526	0.0219709	0.0792532	0.0252793	0.823268	0.157962	0.393418	0.0651768	0.0255199	0.0463535	0.260997	0.229149	0.535546	-5.04711
CCOC(=O)c1cn2ncnc(Nc3ccc4c(cnn4Cc4ccccc4)c3)c2c1C(C)C	CHEMBL365606	210	nM	6.67778	454.212	8	1	5.171	TRUE	454.534	5.171	8	1	3	0.341501	0	86.34	0.0828565	0.68266	0.758912	0.60081	0.953805	0.269837	0.956984	0.0930715	0.305086	0.591715	0.944527	0.180699	0.197197	0.936816	0.999615	0.0136005	0.025133	0.347072	0.324493	0.0255336	0.0860451	0.0958919	0.944482	0.936293	0.594581	0.0726265	0.0825141	0.600711	0.14296	0.181782	0.881971	-5.34997
CCC(C)NCCCn1c(Sc2cc(OC)ccc2I)nc2c(N)ncnc21	CHEMBL381376	210	nM	6.67778	512.086	8	2	3.9511	TRUE	512.421	3.9511	8	2	3	0.331549	1	90.88	0.616867	0.910395	0.891223	0.281864	0.615505	0.0706283	0.321096	0.347893	0.942063	0.830991	0.876309	0.277626	0.641366	0.575657	0.99954	0.00467262	0.0126634	0.589458	0.308783	0.0200694	0.0660385	0.00584982	0.916527	0.904748	0.388607	0.0226528	0.115683	0.0807701	0.0290156	0.398067	0.97301	-5.44999
CS(=O)(=O)CCNCCCCOc1ccc2ncnc(Nc3ccc(F)c(Cl)c3)c2c1	CHEMBL460731	210	nM	6.67778	466.124	7	2	3.9591	TRUE	466.966	3.9591	7	2	4	0.412959	0	93.21	0.433506	0.770818	0.838222	0.736578	0.709754	0.42244	0.371411	0.620977	0.588858	0.806742	0.974437	0.535705	0.628635	0.896028	0.995448	0.0221772	0.0199409	0.429472	0.265967	0.0615441	0.0805463	0.153605	0.640685	0.803719	0.603011	0.0586115	0.205806	0.263377	0.331436	0.151804	0.925153	-5.16401
CCC(CC)NCCCn1c(Sc2cc(OC)ccc2I)nc2c(N)ncnc21	CHEMBL201162	210	nM	6.67778	526.101	8	2	4.3412	TRUE	526.448	4.3412	8	2	3	0.300122	0	90.88	0.613134	0.914322	0.887803	0.235313	0.576214	0.0732307	0.328162	0.353382	0.949433	0.838344	0.866652	0.285488	0.645725	0.532489	0.999505	0.00444662	0.012138	0.581391	0.322307	0.0185108	0.0611342	0.00588091	0.917322	0.933826	0.375515	0.0197955	0.112916	0.0981177	0.025567	0.409134	0.978714	-5.48216
COc1cc2ncnc(Nc3ccc(F)c(Cl)c3)c2cc1NC(=O)/C=C/CN1CCCC(F)C1	CHEMBL3680376	212.11	nM	6.67344	487.159	6	2	5.1031	TRUE	487.938	5.1031	6	2	3	0.451149	1	79.38	0.564188	0.891671	0.830932	0.39839	0.6828	0.13964	0.443592	0.301551	0.556419	0.751475	0.873645	0.27181	0.781327	0.904848	0.998773	0.0281711	0.0106482	0.697433	0.306923	0.0764417	0.159838	0.0930068	0.918612	0.877857	0.827979	0.238008	0.329804	0.536057	0.550258	0.241188	0.905387	-4.98462
O=C(O[C@H]1CN[C@H](C#Cc2cc3ncnc(Nc4ccc(Sc5ccccn5)cc4)c3s2)C1)N1CCOCC1	CHEMBL457250	220	nM	6.65758	558.151	10	2	4.5319	TRUE	558.689	4.5319	10	2	3	0.342191	2	101.5	0.367968	0.423139	0.763545	0.101079	0.442855	0.298656	0.516357	0.095147	0.101979	0.607464	0.835823	0.146282	0.645678	0.967783	0.985639	0.0206999	0.0255835	0.324622	0.180623	0.0527843	0.190921	0.266795	0.777876	0.765628	0.792305	0.28582	0.191179	0.692159	0.671381	0.283713	0.813652	-5.32204
COc1cc2ncnc(NCc3ccccc3)c2cc1OCCCCCCC(=O)NO	CHEMBL596761	225.2	nM	6.64743	424.211	7	3	4.0852	TRUE	424.501	4.0852	7	3	4	0.228442	0	105.6	0.904818	0.806655	0.879372	0.56017	0.887126	0.217804	0.599949	0.256369	0.57664	0.842677	0.948019	0.237677	0.66942	0.833443	0.999251	0.00858598	0.0203183	0.7415	0.305638	0.0439698	0.0947161	0.0260586	0.923247	0.914391	0.802205	0.20179	0.0765544	0.330477	0.448283	0.327347	0.95198	-5.39646
O=C(NO)[C@H]1CC(CC(=O)N2CC[C@@H](O)C2)CC[C@@H]1C(=O)N1CCN(c2ccccc2)CC1	CHEMBL497032	226	nM	6.64589	458.253	6	3	0.8564	TRUE	458.559	0.8564	6	3	4	0.445556	4	113.42	0.168224	0.488373	0.366948	0.00171981	0.139062	0.288892	0.0358311	0.184637	0.0184437	0.832186	0.280087	0.0551598	0.301148	0.387761	0.966226	0.0237499	0.0787921	0.0219452	0.00814172	0.0055271	0.0704349	0.00371253	0.613364	0.151249	0.234604	0.0255038	0.0106197	0.0350131	0.0753892	0.143747	0.575698	-5.37309
COCC(=O)NCC#Cc1ccc2ncnc(Nc3ccc(Oc4cccc(C(=O)NC5CCC5)c4)c(C)c3)c2c1	CHEMBL230786	230	nM	6.63827	549.238	7	3	4.87052	TRUE	549.631	4.87052	7	3	3	0.255303	0	114.47	0.569779	0.48925	0.835909	0.129998	0.631518	0.395945	0.707941	0.132982	0.128201	0.843174	0.893032	0.312512	0.369275	0.95823	0.997885	0.011392	0.0134186	0.385944	0.193522	0.0343277	0.132189	0.0706093	0.808277	0.958991	0.804359	0.219682	0.314584	0.761174	0.488762	0.199811	0.895904	-5.02066
CN1CC2(CC2)C[C@H](C(=O)NO)[C@H]1C(=O)N1CCN(c2ccccc2)CC1	CHEMBL387202	230	nM	6.63827	372.216	5	2	0.9411	TRUE	372.469	0.9411	5	2	4	0.610132	2	76.12	0.264441	0.948698	0.639733	0.00410572	0.135767	0.292942	0.0172202	0.346006	0.0335431	0.827171	0.105412	0.0424193	0.650908	0.230883	0.995478	0.00764231	0.0283906	0.0212168	0.00993979	0.00487033	0.0437602	0.00317387	0.848797	0.0527115	0.183062	0.0172555	0.00828686	0.00570725	0.0292105	0.303843	0.515858	-5.23556
CNC(=O)CN1CCCC(Oc2cc3c(Nc4cccc(Cl)c4F)ncnc3cc2OC)C1	CHEMBL2408209	230	nM	6.63827	473.163	7	2	3.7637	TRUE	473.936	3.7637	7	2	4	0.539702	1	88.61	0.173186	0.916569	0.871741	0.302623	0.67131	0.227181	0.383635	0.351929	0.381497	0.845918	0.952629	0.0887923	0.719626	0.910575	0.999849	0.00656984	0.0071188	0.529684	0.101384	0.0135425	0.0551712	0.0253024	0.966016	0.734823	0.544687	0.0428575	0.0336476	0.0840216	0.10592	0.103004	0.888452	-4.93623
C[C@@H](Oc1cccc2ncnc(Nc3ccc4c(cnn4Cc4cscn4)c3)c12)C(=O)N(C)C	CHEMBL256995	230	nM	6.63827	473.163	9	1	4.0834	TRUE	473.562	4.0834	9	1	4	0.380234	1	98.06	0.405392	0.454696	0.918403	0.436308	0.657431	0.569941	0.446309	0.228356	0.149198	0.674933	0.984126	0.338588	0.38173	0.975596	0.999177	0.0070165	0.0149876	0.471336	0.26057	0.010607	0.0696618	0.0583212	0.875255	0.824542	0.607295	0.0472595	0.0428284	0.368623	0.132849	0.126033	0.864952	-5.27123
FC(F)(F)c1ccc(/C=C/c2nc(CNc3cccc(Br)c3)co2)cc1	CHEMBL5171922	230	nM	6.63827	422.024	3	1	6.2384	TRUE	423.232	6.2384	3	1	3	0.528254	0	38.06	0.190585	0.898825	0.852032	0.954609	0.965068	0.279067	0.587788	0.146154	0.429723	0.573324	0.617489	0.531086	0.0746939	0.921292	0.999921	0.0147047	0.0173483	0.784704	0.539456	0.110158	0.477463	0.187152	0.910199	0.760937	0.887911	0.124995	0.407465	0.932472	0.581354	0.369731	0.797976	-5.09714
C#Cc1cccc(Nc2ncnc3cc4c(cc23)N(C(=O)/C=C/CN2CCCC2)CCO4)c1	CHEMBL3114700	230	nM	6.63827	439.201	6	1	3.7321	TRUE	439.519	3.7321	6	1	4	0.482584	0	70.59	0.708799	0.751996	0.757455	0.387886	0.246359	0.375605	0.268752	0.423206	0.420086	0.644394	0.816588	0.379499	0.780663	0.92182	0.99217	0.0691885	0.0557104	0.423647	0.12462	0.087964	0.242081	0.0624417	0.817286	0.806694	0.703381	0.188119	0.13676	0.343451	0.436535	0.323211	0.88686	-4.90786
C#Cc1cccc(Nc2ncnc3ccc(OCCCCNCCS(C)(=O)=O)cc23)c1	CHEMBL517907	234	nM	6.63078	438.173	7	2	3.1479	TRUE	438.553	3.1479	7	2	4	0.35085	0	93.21	0.664005	0.750711	0.773097	0.699373	0.416347	0.42302	0.24954	0.520633	0.683134	0.678056	0.978823	0.488519	0.626123	0.868434	0.989738	0.0625606	0.0660041	0.398765	0.195667	0.159686	0.170022	0.0833468	0.585469	0.642163	0.579116	0.116565	0.137039	0.289603	0.432772	0.176832	0.918266	-5.12056
CS(=O)(=O)CCNCCCOc1ccc2ncnc(Nc3ccc(OCc4ccccc4)cc3)c2c1	CHEMBL14952	234	nM	6.63078	506.199	8	2	4.3555	TRUE	506.628	4.3555	8	2	3	0.258067	0	102.44	0.499483	0.58116	0.766571	0.503498	0.702716	0.383979	0.364714	0.397507	0.442036	0.791535	0.911105	0.514842	0.444283	0.905899	0.967105	0.013594	0.0250294	0.31987	0.24842	0.0439993	0.0736981	0.0874853	0.470263	0.878897	0.597014	0.0622575	0.229595	0.290171	0.350389	0.189475	0.962781	-5.30471
O=C(Nc1cccc(-c2nc3sccn3c2-c2ccncc2)c1)c1ccccc1Cl	CHEMBL1091613	240	nM	6.61979	430.066	5	1	6.0305	TRUE	430.92	6.0305	5	1	3	0.378344	0	59.29	0.456616	0.648918	0.846303	0.78619	0.939858	0.365197	0.904079	0.094197	0.582803	0.555956	0.934078	0.339579	0.304655	0.952233	0.999769	0.014187	0.0192571	0.85207	0.625148	0.027556	0.20725	0.18613	0.821099	0.91683	0.883512	0.110194	0.395345	0.794528	0.296834	0.401051	0.857307	-5.00541
N#CCC(=O)N/N=C1\C(=O)Nc2ccc(S(=O)(=O)N3CCOCC3)cc21	CHEMBL4282506	240	nM	6.61979	377.079	7	2	-0.60642	TRUE	377.382	-0.60642	7	2	4	0.670948	0	140.96	0.578475	0.682628	0.873952	0.224201	0.0297292	0.27433	0.049573	0.0477111	0.00275121	0.453993	0.026284	0.189876	0.187608	0.981139	0.998159	0.0504937	0.0393389	0.0704256	0.0863543	0.0150532	0.0457229	0.0285253	0.843149	0.0252959	0.102441	0.061063	0.0151247	0.18099	0.293509	0.447304	0.497166	-4.80038
CCc1c(C(=O)OCCCn2ccnc2)cn2ncnc(Nc3ccc4c(cnn4Cc4ccccc4)c3)c12	CHEMBL193368	240	nM	6.61979	520.234	10	1	4.8769	TRUE	520.597	4.8769	10	1	3	0.202838	0	104.16	0.174769	0.592619	0.647625	0.690309	0.986997	0.123278	0.985201	0.0793657	0.851201	0.694839	0.994887	0.0999322	0.283919	0.878681	0.999835	0.00495681	0.0116277	0.473388	0.553506	0.0115454	0.0530327	0.0395601	0.886638	0.980281	0.616768	0.0222786	0.104783	0.555742	0.0869106	0.246382	0.984385	-5.77328
COc1cc2ncnc(Nc3ccc(F)c(Cl)c3)c2cc1OCCCN1CCOCC1	CHEMBL939	240	nM	6.61979	446.152	7	1	4.2756	TRUE	446.91	4.2756	7	1	4	0.517855	0	68.74	0.544835	0.894559	0.911829	0.552013	0.552156	0.185758	0.220399	0.485507	0.344588	0.74071	0.961953	0.223258	0.794504	0.923941	0.999395	0.0159722	0.0167514	0.767932	0.419027	0.0570126	0.0735284	0.0565998	0.922529	0.886959	0.709804	0.114316	0.0904756	0.311031	0.337421	0.227163	0.962407	-4.61397
CNC(=O)[C@@H](C)Oc1cccc2ncnc(Nc3ccc4c(cnn4Cc4nccs4)c3)c12	CHEMBL257410	240	nM	6.61979	459.148	9	2	3.7412	TRUE	459.535	3.7412	9	2	4	0.381754	1	106.85	0.446872	0.410762	0.940088	0.427686	0.606047	0.569958	0.399757	0.183591	0.127531	0.600824	0.976222	0.369963	0.371296	0.981185	0.999127	0.00672658	0.0150107	0.459512	0.180374	0.00970528	0.0805353	0.0597963	0.815432	0.688591	0.526956	0.0509174	0.039227	0.340763	0.171476	0.131721	0.811046	-5.42467
OCc1cccc2[nH]c(-c3n[nH]c4ncc(-c5cncc6ccccc56)cc34)nc12	CHEMBL248890	240	nM	6.61979	392.139	5	3	4.2087	TRUE	392.422	4.2087	5	3	4	0.418577	0	103.37	0.279715	0.327536	0.656341	0.935086	0.686241	0.268944	0.626756	0.27375	0.398374	0.446995	0.900148	0.103007	0.350152	0.945049	0.999642	0.0764286	0.0231556	0.898431	0.692177	0.10809	0.17573	0.167809	0.867797	0.863861	0.722942	0.19544	0.243713	0.804343	0.665983	0.343064	0.956151	-5.77008
CCC(=O)NNC(=O)c1csc2ncc(-c3ccc(C)cc3)n12	CHEMBL5176561	244	nM	6.61261	328.099	5	2	2.54222	TRUE	328.397	2.54222	5	2	4	0.725582	0	75.5	0.759918	0.609644	0.954214	0.174662	0.220303	0.484062	0.126843	0.0476114	0.0147069	0.498972	0.238466	0.567703	0.241698	0.975964	0.9975	0.01279	0.0354199	0.596987	0.0761892	0.019243	0.34956	0.0211781	0.862488	0.245178	0.414234	0.176493	0.0888856	0.206783	0.0992712	0.627882	0.296217	-4.8802
COc1cc2ncnc(Nc3ccc(F)c(Cl)c3)c2cc1NC(=O)/C=C/CN1CCC(F)CC1	CHEMBL3680377	247.12	nM	6.60709	487.159	6	2	5.1031	TRUE	487.938	5.1031	6	2	3	0.451149	0	79.38	0.555748	0.911904	0.844522	0.358612	0.635346	0.144488	0.387852	0.296446	0.52879	0.747051	0.810439	0.276872	0.797123	0.903626	0.998158	0.0280497	0.0107756	0.649532	0.267042	0.0745964	0.149113	0.0821546	0.915362	0.853602	0.791935	0.247046	0.279515	0.474143	0.543614	0.237276	0.9034	-4.97977
Cc1ccn2ncnc(Nc3ccc4c(cnn4Cc4cccnc4)c3)c12	CHEMBL394463	250	nM	6.60206	355.155	7	1	3.57432	TRUE	355.405	3.57432	7	1	4	0.533422	0	72.93	0.430352	0.724846	0.954792	0.890601	0.801759	0.346688	0.423549	0.187552	0.323783	0.68007	0.989396	0.161407	0.382756	0.959769	0.999954	0.0165198	0.0362516	0.667534	0.511157	0.0292567	0.145735	0.0515369	0.93852	0.415455	0.574876	0.115652	0.0598219	0.316122	0.194769	0.241024	0.846561	-5.55136
O=C(/C=C/CN1CCCC1)N1CCOc2cc3ncnc(Nc4ccc(F)c(Cl)c4)c3cc21	CHEMBL4561606	250	nM	6.60206	467.152	6	1	4.5433	TRUE	467.932	4.5433	6	1	4	0.555275	0	70.59	0.527301	0.866926	0.818535	0.38584	0.568295	0.30865	0.41306	0.423012	0.390985	0.755283	0.776031	0.401675	0.759707	0.942196	0.997088	0.0248156	0.0179925	0.498641	0.155561	0.034553	0.132376	0.0787066	0.905762	0.916881	0.727516	0.108333	0.228331	0.372218	0.380437	0.31803	0.903397	-4.90296
CNC(=O)CN1CCC(Oc2cc3c(Nc4cccc(Cl)c4F)ncnc3cc2OC)C1	CHEMBL2408210	250	nM	6.60206	459.147	7	2	3.3736	TRUE	459.909	3.3736	7	2	4	0.559592	1	88.61	0.207185	0.809218	0.8955	0.326849	0.529724	0.317811	0.219642	0.284388	0.204227	0.807264	0.964886	0.105646	0.614259	0.955957	0.999822	0.00825697	0.00805622	0.488943	0.081501	0.0129163	0.0412145	0.0261115	0.954616	0.599356	0.47561	0.0316302	0.0209108	0.0617969	0.0996901	0.100669	0.835899	-4.92231
Nc1ncnc2c1c(-c1ccc3nc(Cc4cccs4)[nH]c3c1)nn2[C@H]1CC[C@H](N2CCOCC2)CC1	CHEMBL248877	250	nM	6.60206	514.226	9	2	4.42	TRUE	514.659	4.42	9	2	3	0.357142	0	110.77	0.495127	0.727147	0.832462	0.166594	0.49072	0.130459	0.431534	0.142834	0.418299	0.592486	0.858535	0.185952	0.779484	0.861928	0.99215	0.0127861	0.0163295	0.462301	0.48696	0.0592609	0.131699	0.0258234	0.599021	0.51534	0.443651	0.30852	0.0726057	0.548672	0.522848	0.294013	0.962362	-5.58814
Cc1nn(-c2ccc(F)cc2)c2c(Nc3ccc(F)c(Cl)c3)ncnc12	CHEMBL5187375	250	nM	6.60206	371.075	5	1	4.79912	TRUE	371.778	4.79912	5	1	4	0.561765	0	55.63	0.164324	0.785385	0.961886	0.936743	0.77723	0.259113	0.470087	0.151788	0.105529	0.615086	0.70838	0.245684	0.0852026	0.98284	0.999962	0.0323528	0.0529897	0.871634	0.701546	0.0551362	0.217657	0.205295	0.957668	0.698567	0.803673	0.311836	0.114245	0.682021	0.368238	0.198025	0.638513	-4.75154
COc1cn2ncnc(Nc3ccc4c(cnn4Cc4cccc(F)c4)c3)c2c1COC[C@@H]1CNCCO1	CHEMBL395883	250	nM	6.60206	517.224	10	2	3.5236	TRUE	517.565	3.5236	10	2	3	0.30649	1	99.76	0.499401	0.517883	0.919255	0.0767581	0.505204	0.187947	0.419488	0.162314	0.109937	0.773476	0.985168	0.21856	0.614083	0.960584	0.999418	0.00523759	0.0122894	0.38159	0.33392	0.0156897	0.0539565	0.0586076	0.815989	0.843004	0.716605	0.060228	0.0378857	0.333483	0.214369	0.119228	0.959319	-5.26234
C#Cc1cccc(Nc2ncnc3cc4c(cc23)N(C(=O)/C=C/CN(C)C)CCO4)c1	CHEMBL3114690	250	nM	6.60206	413.185	6	1	3.1979	TRUE	413.481	3.1979	6	1	4	0.51174	0	70.59	0.819113	0.723804	0.836533	0.332299	0.131188	0.47364	0.0886223	0.3688	0.397208	0.680113	0.814232	0.417149	0.718119	0.924015	0.988267	0.0681031	0.0964443	0.416968	0.133872	0.0733012	0.160726	0.0466265	0.851934	0.711982	0.478009	0.14603	0.0669068	0.236871	0.292532	0.241274	0.836337	-4.81441
O=C1NC(=O)c2c1c1c3ccccc3n3c1c1c2c2ccccc2n1[C@@H]1O[C@H]3C[C@@H]1CO	CHEMBL291126	250	nM	6.60206	423.122	6	2	3.8256	TRUE	423.428	3.8256	6	2	4	0.401522	3	85.49	0.695985	0.406158	0.609191	0.831246	0.101934	0.136552	0.143827	0.0675404	0.0118572	0.449106	0.179471	0.0835255	0.271274	0.98983	0.993461	0.341273	0.0333812	0.634935	0.666333	0.115857	0.0958871	0.250909	0.744901	0.711844	0.864284	0.201152	0.258412	0.889519	0.871038	0.687291	0.807054	-4.93254
C#Cc1cccc(Nc2ncnc3cc4c(cc23)N(C(=O)/C=C/CN(CC)CC)CCO4)c1	CHEMBL3114687	250	nM	6.60206	441.216	6	1	3.9781	TRUE	441.535	3.9781	6	1	4	0.441851	0	70.59	0.890468	0.787937	0.762679	0.41745	0.270382	0.402781	0.209967	0.461276	0.636325	0.70266	0.858167	0.470985	0.818894	0.876867	0.988865	0.0698038	0.0616514	0.501983	0.148078	0.0907822	0.1559	0.0643534	0.849856	0.881748	0.538902	0.206207	0.103799	0.327531	0.365592	0.367627	0.915602	-4.84869
COCCNC(=O)CN1CCC(Oc2cc3c(Nc4cccc(Cl)c4F)ncnc3cc2OC)CC1	CHEMBL2408047	250	nM	6.60206	517.189	8	2	3.7803	TRUE	517.989	3.7803	8	2	3	0.3921	0	97.84	0.225827	0.920958	0.761718	0.126989	0.640722	0.130964	0.495939	0.362854	0.291758	0.89065	0.884903	0.120485	0.687803	0.855094	0.999133	0.00657357	0.00629611	0.483548	0.123358	0.0223629	0.0576539	0.0208756	0.924914	0.813534	0.623603	0.0466286	0.0382359	0.0858038	0.140386	0.142651	0.947614	-5.11373
Cc1nn(-c2ccc(F)cc2)c2ncnc(Nc3ccc(F)c(Cl)c3)c12	CHEMBL4792279	254	nM	6.59517	371.075	5	1	4.79912	TRUE	371.778	4.79912	5	1	4	0.561765	0	55.63	0.133963	0.749346	0.962361	0.856522	0.696367	0.280612	0.422699	0.127276	0.0625086	0.604288	0.493374	0.315142	0.100555	0.982075	0.999911	0.0343802	0.0670642	0.79527	0.606421	0.0536984	0.222223	0.183569	0.948813	0.682235	0.754321	0.327021	0.0887146	0.615316	0.335276	0.170215	0.561555	-4.74131
CO/N=C/c1c(N)ncnc1Nc1ccc2c(c1)CCN2Cc1cccc(F)c1	CHEMBL257814	255	nM	6.59346	392.176	7	2	3.4845	TRUE	392.438	3.4845	7	2	4	0.493176	0	88.66	0.630369	0.834139	0.834133	0.481648	0.901933	0.212468	0.47124	0.274165	0.567888	0.713195	0.933427	0.315827	0.320212	0.815777	0.999028	0.0172325	0.0377713	0.724437	0.411371	0.0566453	0.186152	0.0485667	0.837687	0.826192	0.54299	0.23842	0.178595	0.410845	0.190063	0.278271	0.914514	-5.34612
Oc1ccc2ncnc(Nc3ccc(OCc4ccccc4)cc3)c2c1	CHEMBL14932	263	nM	6.58004	343.132	5	2	4.658	TRUE	343.386	4.658	5	2	4	0.551616	0	67.27	0.784155	0.299039	0.717354	0.944189	0.890892	0.311253	0.408396	0.250202	0.567346	0.527035	0.645704	0.173192	0.051966	0.945672	0.999108	0.0201765	0.0503973	0.897807	0.541666	0.513726	0.804294	0.14235	0.822904	0.575434	0.884802	0.582739	0.512258	0.905256	0.652252	0.460678	0.804736	-5.17834
CNC(=O)CN1CCC(Oc2cc3c(Nc4ccc(F)c(Cl)c4)ncnc3cc2OC)CC1	CHEMBL2408050	264	nM	6.5784	473.163	7	2	3.7637	TRUE	473.936	3.7637	7	2	4	0.539702	0	88.61	0.1867	0.90185	0.8763	0.303958	0.662825	0.223083	0.332871	0.401821	0.360061	0.846565	0.92469	0.0968755	0.703203	0.908142	0.999743	0.00819665	0.00969663	0.584535	0.104168	0.0179508	0.0717272	0.024981	0.96436	0.750684	0.549149	0.050122	0.0370837	0.109853	0.126591	0.111069	0.883993	-5.01266
C=CC(=O)Nc1ccc2nccc(Oc3ccc(C(=O)Nc4cc(CC)ccn4)cc3)c2c1	CHEMBL4752700	268	nM	6.57187	438.169	5	2	5.3613	TRUE	438.487	5.3613	5	2	3	0.378938	0	93.21	0.683564	0.386751	0.839108	0.124523	0.546007	0.395991	0.520379	0.109485	0.153956	0.751945	0.496067	0.525357	0.421291	0.96199	0.97248	0.0208625	0.0547617	0.544401	0.221351	0.0497058	0.23619	0.0901308	0.762396	0.941341	0.798642	0.226669	0.336177	0.786782	0.614204	0.26719	0.796399	-5.1749
CCOC(=O)N1CCN([C@H]2CC[C@H](n3nc(-c4ccc5nc(Cc6ccccc6OC)[nH]c5c4)c4c(N)ncnc43)CC2)CC1	CHEMBL503638	270	nM	6.56864	609.318	10	2	4.809	TRUE	609.735	4.809	10	2	3	0.266014	0	140.31	0.386932	0.724862	0.780035	0.132903	0.795283	0.303883	0.712903	0.274109	0.35024	0.84085	0.933728	0.101314	0.729286	0.898678	0.998699	0.00382984	0.0123178	0.404016	0.287517	0.0250825	0.0549304	0.0309103	0.834887	0.83219	0.659899	0.103181	0.0354502	0.587936	0.364519	0.20927	0.98221	-5.43348
NC(=O)Nc1ccc(C(=O)Nc2ccc3ncnc(Nc4ccc(F)c(Cl)c4)c3c2)cc1	CHEMBL3633940	275	nM	6.56067	450.101	5	4	4.9088	TRUE	450.861	4.9088	5	4	4	0.343906	0	122.03	0.354596	0.635208	0.946068	0.355594	0.388039	0.462866	0.269596	0.139438	0.0920537	0.497219	0.465655	0.49222	0.581733	0.98516	0.987702	0.0322248	0.0515762	0.468509	0.118983	0.0268347	0.10845	0.0822752	0.638386	0.459106	0.35286	0.150046	0.0558035	0.648452	0.379969	0.136871	0.753139	-5.32209
C#CCCCn1c(Sc2cc(OC)ccc2I)nc2c(N)ncnc21	CHEMBL191635	280	nM	6.55284	465.012	7	1	3.5863	TRUE	465.32	3.5863	7	1	4	0.340773	0	78.85	0.783881	0.871866	0.881958	0.895655	0.921635	0.149547	0.777176	0.189608	0.773356	0.708132	0.976669	0.234582	0.275987	0.789404	0.999955	0.0120985	0.0529206	0.856955	0.473128	0.0551612	0.270766	0.0315714	0.947045	0.828583	0.764748	0.163381	0.245853	0.167996	0.122098	0.446353	0.87772	-4.85753
COC(=O)COCc1ccn2ncnc(Nc3ccc4c(cnn4Cc4cccc(F)c4)c3)c12	CHEMBL246491	280	nM	6.55284	460.166	9	1	3.6996	TRUE	460.469	3.6996	9	1	4	0.352894	0	95.57	0.166868	0.810781	0.858547	0.53001	0.897904	0.236058	0.860045	0.120662	0.247804	0.594692	0.980609	0.151833	0.378875	0.969395	0.999284	0.0146107	0.0240823	0.242495	0.168883	0.00926171	0.0433403	0.0689932	0.913634	0.865864	0.402995	0.0392378	0.0240733	0.230447	0.0791999	0.105756	0.894241	-5.20037
CCC(=O)Nc1cc2c(Nc3ccc4c(ccn4S(=O)(=O)c4ccccc4)c3)ncnc2cc1OC	CHEMBL3981041	286	nM	6.54363	501.147	8	2	4.9222	TRUE	501.568	4.9222	8	2	3	0.325131	0	115.21	0.176925	0.310243	0.889049	0.166349	0.685213	0.516712	0.713816	0.109374	0.062325	0.682373	0.798024	0.491396	0.243632	0.99027	0.995845	0.00899883	0.0240933	0.257867	0.105757	0.00914408	0.0540626	0.0301858	0.864614	0.8077	0.479442	0.0335859	0.044109	0.482206	0.234841	0.0823333	0.87378	-4.96279
NC(=O)Nc1ccc2ncnc(Nc3ccc(OCc4cccc(F)c4)c(Cl)c3)c2c1	CHEMBL3633928	287	nM	6.54212	437.105	5	3	5.2355	TRUE	437.862	5.2355	5	3	3	0.382762	0	102.16	0.417802	0.718405	0.968148	0.728575	0.795365	0.548077	0.536146	0.199258	0.207145	0.626841	0.80226	0.420459	0.39091	0.978125	0.999519	0.0185045	0.0361191	0.710216	0.164173	0.027105	0.144085	0.181143	0.796627	0.663653	0.575147	0.157619	0.118987	0.65032	0.445404	0.0741251	0.765874	-5.11109
C#Cc1cccc(Nc2ncnc3cc4c(cc23)N(C(=O)/C=C/CN2CCCCC2C)CCO4)c1	CHEMBL3114686	290	nM	6.5376	467.232	6	1	4.5107	TRUE	467.573	4.5107	6	1	4	0.439827	1	70.59	0.627727	0.840565	0.706751	0.342423	0.375116	0.258499	0.394963	0.480259	0.604227	0.708302	0.782262	0.354591	0.805865	0.852739	0.99485	0.0534266	0.0419628	0.498102	0.138844	0.073005	0.232998	0.0384446	0.876823	0.886882	0.711277	0.152865	0.143354	0.367971	0.320097	0.350445	0.919348	-4.98174
C#Cc1cccc(Nc2ncnc3cc4c(cc23)N(C(=O)/C=C/CN2CCCCC2)CCO4)c1	CHEMBL3114688	290	nM	6.5376	453.216	6	1	4.1222	TRUE	453.546	4.1222	6	1	4	0.462936	0	70.59	0.625316	0.836503	0.718464	0.373191	0.322187	0.28733	0.34043	0.477879	0.493742	0.66748	0.759125	0.343694	0.795209	0.879106	0.99366	0.0580379	0.0447445	0.468207	0.14243	0.0895358	0.262512	0.0482479	0.85738	0.857738	0.734023	0.192502	0.158883	0.382657	0.386419	0.350186	0.900551	-4.95832
CCN(CC)CC1CCN(c2ncc3ncnc(Nc4ccc(F)c(Cl)c4)c3n2)CC1	CHEMBL1358485	290	nM	6.5376	443.2	7	1	4.5141	TRUE	443.958	4.5141	7	1	4	0.575429	0	70.07	0.588157	0.96637	0.872669	0.609664	0.315183	0.0625582	0.327159	0.449682	0.778587	0.669564	0.482695	0.210284	0.879907	0.816469	0.998814	0.0485113	0.0247114	0.628267	0.29839	0.0361094	0.097738	0.0326582	0.955801	0.827548	0.598615	0.184285	0.103687	0.208568	0.242368	0.41958	0.950651	-5.1833
CCOc1cc2ncnc(Nc3ccc(NS(=O)(=O)c4ccccc4)cc3)c2cc1NC(=O)/C=C/CN1CCN(C)CC1	CHEMBL3936505	290	nM	6.5376	601.247	9	3	4.315	TRUE	601.733	4.315	9	3	3	0.21544	0	128.79	0.185725	0.521413	0.759	0.15736	0.388221	0.611483	0.398941	0.229383	0.244529	0.658769	0.707017	0.49088	0.640923	0.984004	0.965874	0.014458	0.0293883	0.0462986	0.0263461	0.0064724	0.0317302	0.0212418	0.720085	0.669486	0.401848	0.0128181	0.0383636	0.273529	0.153145	0.157631	0.918573	-5.32006
COc1cc2ncnc(NCc3ccc(F)cc3)c2cc1OCCCCCCC(=O)NO	CHEMBL596964	295.4	nM	6.52959	442.202	7	3	4.2243	TRUE	442.491	4.2243	7	3	4	0.219014	0	105.6	0.889912	0.749292	0.916523	0.394465	0.839307	0.25193	0.530512	0.236234	0.480167	0.873783	0.964828	0.310637	0.689949	0.867076	0.999372	0.00760613	0.0171204	0.648248	0.253205	0.0275025	0.0716872	0.0233823	0.912845	0.917528	0.760231	0.128449	0.0407172	0.273266	0.355378	0.221622	0.957207	-5.40849
O=S(=O)(c1ccc2[nH]c3nccc(Nc4cccc(O)c4)c3c2c1)N1CCOCC1	CHEMBL3133824	298	nM	6.52578	424.121	6	3	3.1862	TRUE	424.482	3.1862	6	3	4	0.464446	0	107.55	0.155725	0.334073	0.748766	0.813758	0.70171	0.502793	0.698911	0.320337	0.146044	0.567821	0.570756	0.135504	0.193448	0.974632	0.99919	0.0252542	0.0251424	0.525927	0.21099	0.111065	0.173637	0.049859	0.791877	0.148437	0.411466	0.101542	0.0744455	0.791444	0.525385	0.171134	0.864015	-5.35681
COCC#CC(=O)Nc1ccc2ncc(C#N)c(Nc3cccc(Br)c3)c2c1	CHEMBL114593	300	nM	6.52288	434.038	5	2	4.20088	TRUE	435.281	4.20088	5	2	4	0.60027	0	87.04	0.63797	0.770749	0.86433	0.678185	0.623237	0.234298	0.718289	0.201578	0.131094	0.727785	0.700675	0.295296	0.329123	0.972653	0.999595	0.0357214	0.0176604	0.833578	0.465944	0.0313868	0.0895712	0.145994	0.935409	0.885677	0.736613	0.208623	0.307708	0.908129	0.796464	0.376783	0.909753	-4.91922
O=C(C#CCN1CCOCC1)Nc1ccc2ncnc(Nc3ccc(F)c(Cl)c3)c2c1	CHEMBL202621	300	nM	6.52288	439.121	6	2	3.44	TRUE	439.878	3.44	6	2	4	0.60617	0	79.38	0.462897	0.774338	0.882178	0.465563	0.617625	0.290361	0.499818	0.176404	0.221665	0.640548	0.86581	0.260817	0.790941	0.98145	0.998633	0.0158249	0.0124356	0.581401	0.354011	0.045076	0.0902663	0.166922	0.907376	0.685316	0.703564	0.157275	0.217134	0.512231	0.491771	0.335551	0.876776	-4.61654
CN(C)C/C=C/C(=O)Nc1ccc2ncnc(Nc3cccc(Br)c3)c2c1	CHEMBL94061	301	nM	6.52143	425.085	5	2	4.1922	TRUE	426.318	4.1922	5	2	4	0.578817	0	70.15	0.609535	0.953035	0.862597	0.782441	0.439984	0.262366	0.0647742	0.432091	0.765414	0.659974	0.643316	0.364808	0.730478	0.899437	0.995712	0.0928813	0.0536316	0.546062	0.171682	0.037475	0.132146	0.0288134	0.902335	0.779258	0.472498	0.104051	0.107627	0.251965	0.307764	0.293805	0.843132	-5.16531
COc1ccc2ncnc(Nc3ccc(OCc4ccccc4)cc3)c2c1	CHEMBL15202	309	nM	6.51004	357.148	5	1	4.961	TRUE	357.413	4.961	5	1	4	0.5284	0	56.27	0.829631	0.516706	0.919677	0.936265	0.873923	0.341386	0.261546	0.25408	0.431759	0.619647	0.84512	0.319599	0.108186	0.967208	0.999487	0.0218078	0.0515151	0.901024	0.579388	0.134224	0.500561	0.120862	0.872757	0.728434	0.844493	0.480818	0.350199	0.708727	0.498243	0.300763	0.878869	-4.84487
NC(=O)C1CCN(Cc2ccn3ncnc(Nc4ccc5c(cnn5Cc5cccc(F)c5)c4)c23)CC1	CHEMBL398388	310	nM	6.50864	498.229	8	2	3.7073	TRUE	498.566	3.7073	8	2	4	0.354421	0	106.37	0.233222	0.896565	0.747973	0.12325	0.377779	0.118449	0.329275	0.304781	0.621296	0.813194	0.816912	0.211998	0.823242	0.719789	0.998048	0.0227478	0.0205344	0.0909725	0.114164	0.0252569	0.0737381	0.0105226	0.811934	0.797803	0.475802	0.0438127	0.0204907	0.082762	0.0750499	0.170281	0.954338	-5.86293
Clc1ccc(Nc2ccnc3[nH]c4ccccc4c23)cc1	CHEMBL3133823	310	nM	6.50864	293.072	2	2	5.1131	TRUE	293.757	5.1131	2	2	3	0.538788	0	40.71	0.766979	0.900157	0.901051	0.99722	0.854454	0.194454	0.33777	0.286135	0.774307	0.538592	0.815361	0.186882	0.0839625	0.974504	0.999992	0.0971669	0.0163454	0.965312	0.587643	0.17863	0.270232	0.175357	0.945217	0.388692	0.883243	0.262227	0.523549	0.914667	0.808169	0.605894	0.676825	-4.81536
Cc1ccn2ncnc(Nc3ccc4c(cnn4Cc4ccccn4)c3)c12	CHEMBL394462	310	nM	6.50864	355.155	7	1	3.57432	TRUE	355.405	3.57432	7	1	4	0.533422	0	72.93	0.494515	0.783363	0.966144	0.77217	0.595161	0.376172	0.216987	0.207359	0.192456	0.700521	0.942585	0.282799	0.444395	0.956042	0.999821	0.0237037	0.0514324	0.548443	0.304954	0.0279375	0.168914	0.0533405	0.936726	0.42704	0.576145	0.160133	0.0459456	0.255182	0.194107	0.216028	0.792273	-5.55264
Cc1ncnc(Nc2ccc(OCc3cccc(F)c3)c(Cl)c2)c1/C=C/C(=O)NCCN1CCOCC1	CHEMBL1683966	318	nM	6.49757	525.194	7	2	4.36172	TRUE	526.012	4.36172	7	2	3	0.3801	0	88.61	0.469233	0.57555	0.864609	0.069386	0.635734	0.219562	0.363689	0.156686	0.283034	0.873751	0.911565	0.381863	0.70488	0.91928	0.995665	0.0107477	0.0123751	0.309647	0.17818	0.0447643	0.0830449	0.0738127	0.804074	0.929741	0.753002	0.058637	0.211512	0.359731	0.377699	0.201012	0.871576	-5.06588
CN(C)C/C=C/C(=O)N1CCOc2cc3ncnc(Nc4ccc(F)c(Cl)c4)c3cc21	CHEMBL2441565	319	nM	6.49621	441.137	6	1	4.0091	TRUE	441.894	4.0091	6	1	4	0.603158	0	70.59	0.61108	0.844583	0.894579	0.284287	0.425337	0.440662	0.170996	0.347857	0.312272	0.782214	0.701075	0.461388	0.65241	0.947124	0.996482	0.0222687	0.0273822	0.48737	0.149276	0.0243086	0.0896632	0.052491	0.930666	0.852869	0.496784	0.081596	0.0947876	0.277462	0.218096	0.231757	0.834689	-4.80494
C=CC(=O)Nc1cccc(-c2c(-c3ccc(N4CCN(C)CC4)cc3)[nH]c3ncn(CC(C)C)c(=O)c23)c1	CHEMBL4741020	321	nM	6.49349	510.274	6	2	4.5909	TRUE	510.642	4.5909	6	2	3	0.35533	0	86.26	0.252848	0.488785	0.667009	0.173966	0.452856	0.466969	0.409631	0.319279	0.0817089	0.790569	0.643722	0.428085	0.676431	0.953494	0.965494	0.0225271	0.0205327	0.268002	0.12757	0.0252466	0.0504116	0.0440105	0.715863	0.851928	0.535013	0.152506	0.117106	0.484362	0.33133	0.235141	0.929347	-4.98156
COc1cc2ncnc(Nc3ccc(F)c(Cl)c3)c2cc1NC(=O)/C(F)=C/CN1CCCCC1	CHEMBL3357635	324.4	nM	6.48892	487.159	6	2	5.4523	TRUE	487.938	5.4523	6	2	3	0.431193	0	79.38	0.584451	0.921477	0.865989	0.430897	0.523627	0.188413	0.419047	0.40147	0.518155	0.708122	0.835435	0.293497	0.843656	0.911005	0.998677	0.0237539	0.00836767	0.559655	0.245455	0.0374828	0.0985239	0.069737	0.916902	0.930224	0.689979	0.145961	0.169458	0.483776	0.376149	0.337676	0.942421	-4.97264
C#Cc1cccc(Nc2ncnc3cc4c(cc23)N(C(=O)/C=C/CN2CCC(C)CC2)CCO4)c1	CHEMBL3114701	330	nM	6.48149	467.232	6	1	4.3682	TRUE	467.573	4.3682	6	1	4	0.44397	0	70.59	0.589742	0.836406	0.763672	0.309055	0.352367	0.308476	0.406237	0.466497	0.421068	0.712284	0.741929	0.375628	0.778402	0.85798	0.995912	0.0503511	0.0459796	0.490147	0.130641	0.079087	0.260783	0.0495241	0.853842	0.898884	0.750552	0.225374	0.183925	0.372868	0.352795	0.300275	0.884208	-4.97053
CC1CCN(C/C=C/C(=O)N2CCOc3cc4ncnc(Nc5ccc(F)c(Cl)c5)c4cc32)CC1	CHEMBL4468924	337	nM	6.47237	495.184	6	1	5.1794	TRUE	495.986	5.1794	6	1	3	0.491748	0	70.59	0.405075	0.909821	0.801967	0.314912	0.645956	0.243199	0.561842	0.413137	0.420276	0.798628	0.715	0.363147	0.745876	0.885692	0.99826	0.0160163	0.0133631	0.558188	0.17081	0.0312939	0.132122	0.0558869	0.915885	0.954277	0.764758	0.118674	0.308081	0.400645	0.282064	0.297537	0.908109	-4.91799
O=C(/C=C/CN1CCCCC1)N1CCOc2cc3ncnc(Nc4ccc(F)c(Cl)c4)c3cc21	CHEMBL4445017	344	nM	6.46344	481.168	6	1	4.9334	TRUE	481.959	4.9334	6	1	4	0.520751	0	70.59	0.4656	0.918465	0.781678	0.367757	0.63269	0.228514	0.481761	0.426343	0.487768	0.762016	0.729832	0.344787	0.770766	0.906439	0.997672	0.0189648	0.0134525	0.538781	0.174345	0.0353268	0.136321	0.0616108	0.923536	0.937238	0.751249	0.107147	0.277787	0.390129	0.3295	0.353829	0.917181	-4.91849
C=CCOc1ccc2ncnc(Nc3ccc(OCc4ccccc4)cc3)c2c1	CHEMBL540701	347	nM	6.45967	383.163	5	1	5.5172	TRUE	383.451	5.5172	5	1	3	0.406237	0	56.27	0.744511	0.518865	0.882776	0.883002	0.864179	0.377303	0.348651	0.254192	0.471364	0.618276	0.798593	0.481275	0.142532	0.959521	0.998177	0.0232966	0.0563327	0.823886	0.539362	0.087539	0.415113	0.151608	0.795522	0.882875	0.849491	0.289206	0.387462	0.665728	0.423695	0.336012	0.901588	-4.98216
CN1CCN(C(=O)COc2cccc3ncnc(Nc4ccc(OCc5ccccn5)c(Cl)c4)c23)CC1	CHEMBL258352	350	nM	6.45593	518.183	8	1	4.1536	TRUE	519.005	4.1536	8	1	3	0.371646	0	92.71	0.348929	0.585402	0.830923	0.243905	0.672927	0.507056	0.370772	0.331403	0.197958	0.83958	0.891338	0.330064	0.738372	0.967788	0.99458	0.00926463	0.0119187	0.229223	0.154321	0.0208334	0.0604698	0.0732953	0.906269	0.907446	0.711104	0.0234366	0.0580918	0.202556	0.132359	0.23124	0.926625	-5.2214
Oc1ccc(CN(Cc2cccc(Cl)c2O)C(=S)Nc2ccccc2)cc1	CHEMBL592466	350	nM	6.45593	398.086	3	3	5.1504	TRUE	398.915	5.1504	3	3	3	0.518702	0	55.73	0.0824323	0.304797	0.508716	0.920759	0.983218	0.397593	0.963316	0.177465	0.791027	0.669031	0.776403	0.426669	0.00790581	0.558439	0.999777	0.00427543	0.00316536	0.125373	0.481359	0.215677	0.386485	0.463994	0.821742	0.564755	0.760837	0.00752582	0.835437	0.972565	0.489358	0.817419	0.894191	-5.26276
FC(F)(F)c1ccc(/C=C/c2nc(COc3ccc(CCCCn4ccnn4)cc3)co2)cc1	CHEMBL1614707	350	nM	6.45593	468.177	6	0	6.0572	TRUE	468.479	6.0572	6	0	3	0.26491	0	65.97	0.570342	0.687201	0.867923	0.305774	0.908286	0.158248	0.798651	0.0862384	0.230509	0.864949	0.900249	0.541033	0.302487	0.856793	0.999722	0.00521009	0.0162933	0.145648	0.507575	0.0561596	0.176704	0.125723	0.823901	0.984403	0.875726	0.0361437	0.194481	0.545366	0.148226	0.270005	0.882011	-5.1589
O=C(Nc1cccc2ccccc12)c1ccc(N(CCCl)CCCl)cc1	CHEMBL602728	350	nM	6.45593	386.095	2	1	5.3761	TRUE	387.31	5.3761	2	1	3	0.552606	0	32.34	0.896018	0.954555	0.847344	0.886492	0.806379	0.401153	0.531946	0.477364	0.330976	0.702748	0.643084	0.773809	0.350552	0.851851	0.997685	0.106652	0.0343833	0.729748	0.294955	0.0668008	0.439363	0.194806	0.818944	0.801042	0.853175	0.345077	0.395585	0.640978	0.630674	0.740721	0.913593	-4.8656
Cc1ccc(-c2c(CN3CCOCC3)nc3scc(C(=O)NN)n23)cc1	CHEMBL5170804	357	nM	6.44733	371.142	7	2	1.80692	TRUE	371.466	1.80692	7	2	4	0.415043	0	84.89	0.885249	0.750322	0.918444	0.343939	0.595722	0.259349	0.534202	0.150872	0.141417	0.499401	0.890258	0.4431	0.751416	0.894655	0.999521	0.00698019	0.011423	0.681912	0.254513	0.0480914	0.213169	0.0186635	0.809521	0.604525	0.379158	0.113566	0.124875	0.154551	0.085448	0.598646	0.857194	-5.06081
O=C(NO)[C@H]1CC2(CC2)CN[C@@H]1C(=O)N1CCC(c2ccccc2)C1	CHEMBL252246	359	nM	6.44491	343.19	4	3	1.2662	TRUE	343.427	1.2662	4	3	4	0.570149	3	81.67	0.539238	0.883796	0.840981	0.0198691	0.199955	0.0955701	0.0205369	0.229778	0.122449	0.713886	0.300138	0.0301163	0.613771	0.107271	0.999245	0.0159342	0.0264624	0.0411571	0.0176736	0.0167284	0.130927	0.00274875	0.7336	0.0245058	0.147833	0.0314836	0.0127211	0.00769689	0.0314517	0.432741	0.30516	-5.45341
C#CCCCn1c(Sc2cc(OC)ccc2I)nc2c(N)nc(F)nc21	CHEMBL201684	360	nM	6.4437	483.003	7	1	3.7254	TRUE	483.31	3.7254	7	1	4	0.249343	0	78.85	0.658371	0.922252	0.864663	0.868381	0.871085	0.1931	0.914191	0.273361	0.555753	0.690077	0.968746	0.1761	0.285599	0.848922	0.999966	0.0140662	0.0829027	0.902588	0.463644	0.0614196	0.266759	0.0548397	0.962771	0.874826	0.811022	0.14319	0.133606	0.381753	0.185724	0.366325	0.894163	-4.74057
Cn1ncc2cc(Nc3ncnn4ccc(CN5CCC(N)CC5)c34)ccc21	CHEMBL1645464	360	nM	6.4437	376.212	8	2	2.2827	TRUE	376.468	2.2827	8	2	4	0.568	0	89.3	0.382117	0.964073	0.865537	0.113067	0.0436283	0.0517736	0.0153826	0.44079	0.361332	0.545587	0.121192	0.159897	0.780114	0.478226	0.998502	0.0133378	0.0307637	0.25813	0.052142	0.0104844	0.0960964	0.000670829	0.636723	0.186426	0.122102	0.0146178	0.00673658	0.0123616	0.0302671	0.24704	0.938638	-5.97367
Fc1cccc(Cn2ncc3cc(Nc4ncnn5ccc(CN6CCCC6)c45)ccc32)c1	CHEMBL391675	360	nM	6.4437	441.208	7	1	4.6058	TRUE	441.514	4.6058	7	1	4	0.417104	0	63.28	0.374496	0.924465	0.866668	0.49479	0.612303	0.248108	0.414279	0.440551	0.744546	0.729515	0.958791	0.399493	0.852364	0.863456	0.999574	0.0143528	0.0188052	0.349683	0.215499	0.011814	0.0481189	0.0153721	0.904056	0.937352	0.599619	0.0287014	0.0411197	0.190201	0.054551	0.259795	0.984657	-5.46078
CNC(=O)CN1CCC(Oc2cc3c(Nc4cccc(Cl)c4)ncnc3cc2OC)CC1	CHEMBL2408052	360	nM	6.4437	455.172	7	2	3.6246	TRUE	455.946	3.6246	7	2	4	0.562003	0	88.61	0.209457	0.923179	0.837111	0.474409	0.632736	0.135707	0.198807	0.403618	0.544116	0.825084	0.786952	0.0772354	0.658176	0.837966	0.99967	0.00824664	0.0106795	0.589013	0.0973259	0.0145731	0.0895944	0.0130022	0.959106	0.673021	0.500804	0.0437871	0.0457347	0.0768223	0.0991283	0.181472	0.865136	-5.14198
COc1ccc(I)c(Sc2nc3c(N)ncnc3n2CCC=C(C)C)c1	CHEMBL379892	370	nM	6.4318	481.043	7	1	4.5292	TRUE	481.363	4.5292	7	1	4	0.411947	0	78.85	0.624424	0.871494	0.888679	0.792851	0.973966	0.135435	0.879159	0.13727	0.714482	0.780002	0.943133	0.168154	0.19237	0.798745	0.999967	0.00625104	0.0162733	0.872698	0.623922	0.0433875	0.146477	0.0650166	0.970519	0.940612	0.784621	0.0913243	0.493247	0.282518	0.0921588	0.434317	0.877864	-5.03685
O=S(=O)(c1ccc2[nH]c3nccc(Nc4cccc(O)c4)c3c2c1)N1CCN(CCO)CC1	CHEMBL3133832	376	nM	6.42481	467.163	7	4	2.4639	TRUE	467.551	2.4639	7	4	4	0.343635	0	121.79	0.0776558	0.193781	0.470972	0.538919	0.455728	0.545624	0.419116	0.584109	0.237527	0.552568	0.497261	0.203352	0.419899	0.902849	0.989959	0.0385973	0.0253581	0.361325	0.0436737	0.0260862	0.0520958	0.00696656	0.459122	0.140943	0.159425	0.01809	0.0183124	0.40595	0.205319	0.145931	0.946714	-5.83354
CC#CC(=O)Nc1ccc2ncnc(Nc3cccc(Br)c3)c2c1	CHEMBL91867	378	nM	6.42251	380.027	4	2	4.0977	TRUE	381.233	4.0977	4	2	4	0.670846	0	66.91	0.672286	0.893277	0.916517	0.978443	0.774838	0.46953	0.362142	0.319522	0.462018	0.674104	0.85106	0.271793	0.234422	0.975453	0.999915	0.0425623	0.051139	0.927322	0.364267	0.0415498	0.34098	0.119813	0.963165	0.495221	0.793601	0.365672	0.309569	0.80534	0.553301	0.48397	0.737628	-4.88175
COCC#CC(=O)Nc1cc2c(Nc3cccc(Br)c3)c(C#N)cnc2cc1OC	CHEMBL326280	380	nM	6.42022	464.048	6	2	4.20948	TRUE	465.307	4.20948	6	2	4	0.548527	0	96.27	0.57553	0.584721	0.867504	0.457706	0.579419	0.242817	0.711513	0.210349	0.0887778	0.702499	0.694008	0.337918	0.247753	0.978441	0.998945	0.0197026	0.0130249	0.804472	0.331977	0.0222929	0.0531326	0.11748	0.914964	0.911974	0.716683	0.128335	0.242304	0.885935	0.709757	0.315004	0.913634	-4.98066
c1ccc(Cn2ncc3cc(Nc4ncnn5ccc(COC[C@@H]6CNCCO6)c45)ccc32)nc1	CHEMBL396079	380	nM	6.42022	470.218	10	2	2.7709	TRUE	470.537	2.7709	10	2	4	0.356907	1	103.42	0.412334	0.575191	0.869665	0.107946	0.195462	0.128674	0.145	0.137549	0.107304	0.610451	0.933463	0.167542	0.724447	0.923115	0.995763	0.0128636	0.0183894	0.265047	0.267862	0.0324751	0.0997644	0.0421983	0.80653	0.391791	0.484321	0.0571559	0.049035	0.166323	0.305035	0.197108	0.902646	-5.76357
COCOC#CC(=O)Nc1ccc2ncc(C#N)c(Nc3cccc(Br)c3)c2c1	CHEMBL414631	380	nM	6.42022	450.033	6	2	4.13248	TRUE	451.28	4.13248	6	2	4	0.344161	0	96.27	0.725472	0.735959	0.750015	0.660399	0.686855	0.138433	0.642251	0.217282	0.235401	0.659542	0.798936	0.177577	0.442468	0.959009	0.998315	0.0540956	0.0170714	0.852199	0.551716	0.0904793	0.117914	0.234553	0.891168	0.945491	0.825427	0.328081	0.324363	0.908733	0.850989	0.412333	0.928824	-4.99548
CC1CCCCN1C/C=C/C(=O)N1CCOc2cc3ncnc(Nc4ccc(F)c(Cl)c4)c3cc21	CHEMBL4458843	384	nM	6.41567	495.184	6	1	5.3219	TRUE	495.986	5.3219	6	1	3	0.482846	1	70.59	0.457614	0.922185	0.762439	0.352167	0.674753	0.198788	0.520321	0.421298	0.625687	0.787193	0.746559	0.34338	0.780776	0.880863	0.998021	0.0171167	0.0119994	0.574093	0.173655	0.0316889	0.120275	0.046689	0.935674	0.945638	0.717712	0.0747708	0.254217	0.377562	0.262768	0.349032	0.932194	-4.95528
O=C(CCCCCn1cc(-c2ccc3ncnc(Nc4cccc(Cl)c4F)c3c2)nn1)NO	CHEMBL3929484	386.1	nM	6.4133	469.143	8	3	4.4902	TRUE	469.908	4.4902	8	3	4	0.187605	0	117.85	0.890619	0.619186	0.870186	0.291094	0.646104	0.145344	0.431076	0.0933732	0.358426	0.806009	0.958068	0.401682	0.787481	0.93677	0.999015	0.0141981	0.0107575	0.472433	0.373604	0.0680677	0.119034	0.0640226	0.823545	0.849599	0.734527	0.11749	0.0463095	0.365069	0.417168	0.324302	0.878391	-5.6371
NS(=O)(=O)c1ccc(-n2c(SCC(=O)Nc3cnc4ccccc4c3)nc3cc4ccccc4cc3c2=O)cc1	CHEMBL4166412	390	nM	6.40894	567.103	8	2	4.4653	TRUE	567.652	4.4653	8	2	3	0.172156	0	137.04	0.103659	0.475437	0.785366	0.329965	0.398814	0.689564	0.570661	0.119773	0.0799936	0.397316	0.659812	0.520355	0.349951	0.982413	0.953983	0.0669661	0.0780943	0.0742942	0.1161	0.0211825	0.0775071	0.199437	0.548212	0.69715	0.315371	0.04439	0.0344445	0.301361	0.0962522	0.158522	0.767182	-5.88925
COc1cccc(Nc2ccnc3[nH]c4ccc(S(=O)(=O)N5CCNCC5)cc4c23)c1	CHEMBL3133828	390	nM	6.40894	437.152	6	3	3.0622	TRUE	437.525	3.0622	6	3	4	0.443841	0	99.35	0.127165	0.465126	0.845175	0.833	0.803487	0.581054	0.77786	0.567606	0.286392	0.701452	0.974742	0.158589	0.395293	0.982027	0.999696	0.0244662	0.0342648	0.530984	0.231392	0.0317549	0.0673434	0.0501531	0.880922	0.299927	0.481669	0.0410868	0.0400487	0.642484	0.371057	0.151625	0.956283	-5.06374
CCOC(=O)c1cc2c(Nc3ccc4c(cnn4Cc4ccccc4)c3)ncnn2c1	CHEMBL425738	390	nM	6.40894	412.165	8	1	4.0476	TRUE	412.453	4.0476	8	1	4	0.423624	0	86.34	0.124338	0.709075	0.818648	0.841885	0.945571	0.282714	0.898856	0.103039	0.306965	0.449201	0.913339	0.162141	0.224483	0.971101	0.999464	0.0176233	0.0396347	0.541294	0.272092	0.0301048	0.133347	0.121077	0.928087	0.809339	0.621692	0.193658	0.0885194	0.579406	0.232606	0.184719	0.826431	-5.35525
CCC(=O)Nc1cc2c(Nc3ccc(OCc4ccccc4)cc3)ncnc2cc1OC	CHEMBL3934034	404	nM	6.39362	428.185	6	2	5.3095	TRUE	428.492	5.3095	6	2	3	0.39561	0	85.37	0.560061	0.368661	0.863608	0.440705	0.814514	0.327803	0.569231	0.157868	0.18523	0.764694	0.781133	0.304386	0.170067	0.966636	0.994843	0.0173726	0.0402612	0.77893	0.378351	0.0512305	0.183959	0.076053	0.863362	0.914317	0.809812	0.287491	0.230568	0.676921	0.567398	0.176667	0.893287	-5.09124
CCC(=O)Nc1cc2c(Nc3ccc(F)c(Cl)c3)ncnc2cc1OC	CHEMBL3930316	406	nM	6.39147	374.095	5	2	4.523	TRUE	374.803	4.523	5	2	4	0.686112	0	76.14	0.360669	0.725229	0.941393	0.876834	0.710699	0.317741	0.348455	0.193632	0.200344	0.745386	0.904774	0.121835	0.149054	0.982707	0.999924	0.0260475	0.0305242	0.919371	0.435	0.056339	0.149091	0.0766677	0.967198	0.457137	0.689673	0.286603	0.110711	0.45885	0.523901	0.118392	0.629794	-4.66439
COc1ccc(NC(=O)c2ccc(N(CCCl)CCCl)cc2)cc1	CHEMBL589588	410	nM	6.38722	366.09	3	1	4.2315	TRUE	367.276	4.2315	3	1	4	0.710247	0	41.57	0.917344	0.837744	0.937331	0.699806	0.72479	0.357625	0.450585	0.414393	0.215432	0.703341	0.53713	0.780796	0.231069	0.81787	0.995415	0.0437601	0.045078	0.674853	0.204185	0.0648412	0.43489	0.113884	0.897047	0.398875	0.756252	0.542404	0.399404	0.605577	0.674251	0.543084	0.823099	-4.74396
COc1cc2ncnc(Nc3cccc(Cl)c3F)c2cc1OC1CCN(CC(=O)NC(C)C)CC1	CHEMBL2408048	410	nM	6.38722	501.194	7	2	4.5423	TRUE	501.99	4.5423	7	2	3	0.46806	0	88.61	0.138823	0.87183	0.82912	0.199712	0.784671	0.182065	0.62949	0.350433	0.38749	0.888743	0.935083	0.136171	0.603758	0.851974	0.999667	0.00756546	0.00878259	0.546502	0.146214	0.0177018	0.063476	0.021352	0.962701	0.86088	0.64547	0.0363905	0.0683453	0.18348	0.116381	0.108335	0.914294	-5.04363
c1cncc(Cn2ncc3cc(Nc4ncnn5ccc(COC[C@@H]6CNCCO6)c45)ccc32)c1	CHEMBL247127	410	nM	6.38722	470.218	10	2	2.7709	TRUE	470.537	2.7709	10	2	4	0.356907	1	103.42	0.373583	0.531424	0.864708	0.184813	0.301599	0.135991	0.275771	0.139129	0.135856	0.589491	0.979184	0.121747	0.717818	0.93669	0.998221	0.01049	0.0147629	0.379372	0.41623	0.0315672	0.0841476	0.0414911	0.824814	0.396091	0.491122	0.0441441	0.0613205	0.200476	0.289318	0.213774	0.924486	-5.76391
COc1cc2ncnc(Nc3ccc(Cc4ccccn4)cc3)c2cc1NC(=O)/C=C/CN1CCCC1	CHEMBL3930965	413	nM	6.38405	494.243	7	2	4.9583	TRUE	494.599	4.9583	7	2	4	0.317875	0	92.27	0.45716	0.575615	0.778789	0.141375	0.330555	0.222271	0.275133	0.262976	0.268157	0.782205	0.69621	0.286183	0.746355	0.906443	0.983709	0.0276536	0.0179748	0.429101	0.097101	0.0446889	0.101329	0.0323551	0.858748	0.85903	0.641419	0.148918	0.165579	0.318601	0.493221	0.194394	0.907333	-5.27496
CN(C/C=C/C(=O)Nc1ccc2ncnc(Nc3cccc(Br)c3)c2c1)CCO	CHEMBL93783	414	nM	6.383	455.096	6	3	3.5547	TRUE	456.344	3.5547	6	3	4	0.449518	0	90.38	0.473083	0.785065	0.725542	0.670241	0.421347	0.27679	0.107108	0.308515	0.721028	0.481828	0.59541	0.368042	0.704405	0.858198	0.99002	0.0847099	0.044231	0.55509	0.102295	0.0212447	0.105381	0.0260548	0.773322	0.715409	0.334188	0.0603163	0.0782009	0.311807	0.261718	0.246587	0.858869	-5.34426
CCC(=O)Nc1cc2c(Nc3ccc(Oc4ccccc4)cc3)ncnc2cc1OC	CHEMBL3943512	419	nM	6.37779	414.169	6	2	5.5228	TRUE	414.465	5.5228	6	2	3	0.413967	0	85.37	0.539274	0.498438	0.886571	0.555028	0.836721	0.373284	0.60897	0.190102	0.228668	0.755366	0.833158	0.270996	0.214078	0.971692	0.997835	0.0154171	0.0382247	0.796431	0.395612	0.0396209	0.141441	0.0753487	0.911468	0.885916	0.800414	0.215019	0.225079	0.686763	0.537603	0.169218	0.891277	-5.05848
O=C1CSC(N/N=C/c2cc(Br)ccc2O)=N1	CHEMBL592457	420	nM	6.37675	312.952	5	2	1.7076	TRUE	314.164	1.7076	5	2	4	0.643642	0	74.05	0.261053	0.855992	0.93933	0.979484	0.47415	0.478875	0.336002	0.263186	0.109243	0.516417	0.137327	0.258356	0.0130917	0.897103	0.999959	0.00627451	0.0168123	0.525853	0.035468	0.0157477	0.116514	0.104925	0.898596	0.249963	0.523488	0.119401	0.217608	0.874343	0.109767	0.896274	0.263619	-5.31057
COCCOCc1ccn2ncnc(Nc3ccc4c(cnn4Cc4cccc(F)c4)c3)c12	CHEMBL246489	420	nM	6.37675	446.187	8	1	4.173	TRUE	446.486	4.173	8	1	4	0.342515	0	78.5	0.439539	0.82704	0.889521	0.268413	0.853778	0.213318	0.718444	0.204692	0.202385	0.850589	0.980008	0.263813	0.495863	0.920391	0.999571	0.0078739	0.020141	0.505404	0.413216	0.0156937	0.0593359	0.0416149	0.918355	0.957883	0.670089	0.0514943	0.0440778	0.24833	0.089317	0.139194	0.975302	-5.34588
COCc1ccn2ncnc(Nc3ccc4c(cnn4Cc4cccc(F)c4)c3)c12	CHEMBL394056	420	nM	6.37675	402.16	7	1	4.1564	TRUE	402.433	4.1564	7	1	4	0.461966	0	69.27	0.456194	0.84536	0.933984	0.637893	0.882	0.302858	0.622786	0.215864	0.291034	0.756141	0.978237	0.250071	0.475003	0.947396	0.999869	0.0148735	0.0300422	0.532339	0.473411	0.0231623	0.0947476	0.0620583	0.942793	0.909046	0.626331	0.0904644	0.0439079	0.299888	0.128377	0.145056	0.938519	-5.2504
Cc1ccn2ncnc(Nc3ccc(OCc4cccc(F)c4)c(Cl)c3)c12	CHEMBL247101	430	nM	6.36653	382.1	5	1	5.15282	TRUE	382.826	5.15282	5	1	3	0.518107	0	51.45	0.324467	0.76729	0.947354	0.923804	0.971602	0.399059	0.807587	0.157084	0.287576	0.759709	0.86615	0.304661	0.0642166	0.955932	0.999986	0.0082109	0.0308439	0.81934	0.673655	0.053014	0.334609	0.161188	0.949542	0.895044	0.858494	0.124611	0.180242	0.696932	0.24981	0.149936	0.761477	-5.0788
COc1ccccc1CO/N=C/c1c(N)ncnc1Nc1ccc2c(cnn2Cc2cccc(F)c2)c1	CHEMBL255236	435	nM	6.36151	497.198	9	2	4.8988	TRUE	497.534	4.8988	9	2	4	0.220021	0	112.47	0.451847	0.5687	0.844115	0.345626	0.971565	0.323617	0.800022	0.148809	0.296652	0.806824	0.98707	0.353047	0.206282	0.942295	0.999586	0.00254822	0.0120894	0.734701	0.388463	0.0156063	0.0652144	0.0670257	0.810175	0.955484	0.737375	0.0632512	0.108042	0.361692	0.0977054	0.126408	0.967566	-5.41385
Cc1ccccc1NCc1coc(/C=C/c2ccc(C(F)(F)F)cc2)n1	CHEMBL5207091	440	nM	6.35655	358.129	3	1	5.78432	TRUE	358.363	5.78432	3	1	3	0.627758	0	38.06	0.37515	0.912221	0.933236	0.917416	0.966667	0.392609	0.35594	0.210437	0.343982	0.728197	0.752213	0.623284	0.0855639	0.879395	0.999954	0.0135213	0.0251434	0.694882	0.640065	0.16221	0.483725	0.124084	0.961341	0.776961	0.886198	0.168694	0.245776	0.917375	0.445279	0.303783	0.859874	-5.05138
Clc1cc(Nc2ncnc3[nH]nc(OCCCN4CCOCC4)c23)ccc1OCc1ccccn1	CHEMBL257859	440	nM	6.35655	495.179	9	2	3.825	TRUE	495.971	3.825	9	2	4	0.316976	0	110.31	0.385215	0.546087	0.838044	0.373095	0.61346	0.107004	0.415311	0.276477	0.399506	0.733332	0.91858	0.240276	0.81503	0.89788	0.992243	0.00833017	0.0109482	0.588466	0.226187	0.0627633	0.0901632	0.0428045	0.722937	0.670535	0.612424	0.0916282	0.0937135	0.313109	0.424051	0.283149	0.921002	-5.43378
O=C(O[C@H]1CN[C@H](C#Cc2cc3ncnc(Nc4ccc(OCc5cccc(F)c5)nc4)c3s2)C1)N1CCOCC1	CHEMBL449949	450	nM	6.34679	574.18	10	2	4.0988	TRUE	574.638	4.0988	10	2	3	0.329032	2	110.73	0.416813	0.398212	0.773515	0.0766264	0.437002	0.215856	0.461124	0.0740784	0.163425	0.662247	0.884452	0.155674	0.58101	0.973059	0.988773	0.0125833	0.0164845	0.280795	0.171389	0.0314411	0.122103	0.17525	0.727535	0.78597	0.79093	0.160111	0.115029	0.609723	0.582262	0.239952	0.839437	-5.1732
COCCOCC#CC(=O)Nc1ccc2ncc(C#N)c(Nc3cccc(Br)c3)c2c1	CHEMBL115440	450	nM	6.34679	478.064	6	2	4.21748	TRUE	479.334	4.21748	6	2	4	0.389384	0	96.27	0.71095	0.747525	0.799907	0.321611	0.666625	0.181533	0.735488	0.213666	0.0879239	0.782971	0.681353	0.378985	0.511028	0.954798	0.997903	0.0170698	0.0110364	0.761142	0.419685	0.0270083	0.051315	0.0974657	0.892814	0.942857	0.686563	0.130416	0.204301	0.813343	0.67383	0.358734	0.957026	-5.06019
CCC(=O)Nc1cc2c(Nc3ccc(OCc4cccc(F)c4)c(Cl)c3)ncnc2cc1OC	CHEMBL3961532	458	nM	6.33913	480.136	6	2	6.102	TRUE	480.927	6.102	6	2	3	0.316629	0	85.37	0.301112	0.396564	0.892348	0.382873	0.845787	0.326643	0.699795	0.102619	0.194378	0.821164	0.89321	0.321507	0.148657	0.97265	0.999251	0.00922489	0.0149661	0.782426	0.34407	0.0237578	0.0985225	0.0981191	0.855249	0.934648	0.746518	0.0934598	0.228261	0.579129	0.468367	0.105779	0.87769	-5.09096
C=C(CN1CCOCC1)C(=O)Nc1ccc2ncnc(Nc3cccc(Br)c3)c2c1	CHEMBL94066	458	nM	6.33913	467.096	6	2	3.9628	TRUE	468.355	3.9628	6	2	4	0.533614	0	79.38	0.561207	0.905074	0.812279	0.823998	0.886788	0.286365	0.75929	0.281656	0.397294	0.579064	0.933592	0.247558	0.75615	0.953188	0.999342	0.016678	0.010952	0.664047	0.326883	0.0435728	0.138323	0.148805	0.885873	0.853166	0.738331	0.154513	0.386076	0.567966	0.532098	0.507018	0.939471	-4.96471
CCCCN(CC#CC(=O)Nc1ccc2ncnc(Nc3ccc(F)c(Cl)c3)c2c1)CCCC	CHEMBL202398	464	nM	6.33348	481.204	5	2	6.01	TRUE	482.003	6.01	5	2	3	0.346877	0	70.15	0.532393	0.858973	0.77078	0.491251	0.741815	0.312709	0.679555	0.307853	0.734282	0.798176	0.846173	0.579742	0.704373	0.829228	0.996999	0.0150935	0.00908456	0.566482	0.33124	0.0305054	0.0921904	0.126346	0.851141	0.958574	0.612471	0.0793401	0.351036	0.617229	0.323111	0.485189	0.948417	-4.95287
O=C(NO)[C@H]1CCCC[C@@H]1C(=O)N1CCN(c2ccccc2)CC1	CHEMBL496212	470	nM	6.3279	331.19	4	2	1.647	TRUE	331.416	1.647	4	2	4	0.652393	2	72.88	0.65435	0.94615	0.815497	0.0512558	0.540106	0.517227	0.114726	0.242522	0.0196229	0.797626	0.332938	0.133599	0.42281	0.594432	0.998486	0.0128862	0.035535	0.107072	0.0585334	0.0186102	0.148648	0.0228204	0.908575	0.0872422	0.488008	0.0987494	0.0370606	0.112099	0.260726	0.476046	0.46845	-4.99324
N#Cc1c(N)ncnc1Nc1ccc(OCc2ccccc2)c(Cl)c1	CHEMBL500591	470	nM	6.3279	351.089	6	2	3.90648	TRUE	351.797	3.90648	6	2	4	0.722997	0	96.85	0.659538	0.692063	0.931775	0.927799	0.971559	0.159666	0.825381	0.137828	0.526838	0.599853	0.849442	0.324657	0.123183	0.94207	0.999957	0.00568113	0.0235835	0.90048	0.843167	0.102774	0.230881	0.0893079	0.903312	0.43359	0.736158	0.230923	0.231725	0.753684	0.350842	0.300173	0.751318	-5.11185
COc1cc2ncnc(NCc3ccc(Cl)c(F)c3)c2cc1OCCCCCCC(=O)NO	CHEMBL596957	478.2	nM	6.32039	476.163	7	3	4.8777	TRUE	476.936	4.8777	7	3	4	0.194227	0	105.6	0.779395	0.737016	0.898262	0.447005	0.917959	0.242193	0.715842	0.234128	0.504099	0.883849	0.987314	0.235255	0.57818	0.904657	0.9997	0.0058278	0.0107365	0.728725	0.335244	0.0391143	0.0852366	0.0469726	0.918186	0.944175	0.793885	0.065502	0.0675985	0.399464	0.39071	0.193189	0.928352	-5.33403
COC[C@H](C)Oc1cc2ncnc(Nc3ccc(F)c(Cl)c3)c2cc1NC(=O)/C=C/CN(C)C	CHEMBL4443188	482.1	nM	6.31686	487.179	7	2	4.6359	TRUE	487.963	4.6359	7	2	4	0.402711	1	88.61	0.601266	0.661436	0.885334	0.120231	0.283053	0.231896	0.101689	0.20763	0.208693	0.831481	0.814113	0.369734	0.617181	0.924096	0.991125	0.0282075	0.0217363	0.519987	0.227944	0.0488066	0.064511	0.0487609	0.896004	0.821691	0.534811	0.0992409	0.0963201	0.256602	0.316419	0.15263	0.840584	-4.95246
Cc1nnc(-c2cn3ncnc(Nc4cnc5[nH]ccc5c4)c3c2C(C)C)o1	CHEMBL258694	500	nM	6.30103	374.16	8	2	3.83102	TRUE	374.408	3.83102	8	2	4	0.49173	0	109.82	0.286181	0.406842	0.92609	0.600839	0.279833	0.259599	0.267737	0.234689	0.0929452	0.605754	0.796867	0.213272	0.326088	0.965611	0.999377	0.0332	0.0316885	0.642654	0.246979	0.0750711	0.146246	0.0582135	0.914746	0.300616	0.444231	0.286059	0.0474819	0.503658	0.500186	0.189153	0.673788	-5.58132
CCc1c(C(=O)N(C)C)cn2ncnc(Nc3ccc4c(cnn4Cc4ccccc4)c3)c12	CHEMBL372293	500	nM	6.30103	439.212	7	1	4.1351	TRUE	439.523	4.1351	7	1	4	0.430217	0	80.35	0.328814	0.785416	0.856028	0.238547	0.819687	0.459865	0.790058	0.204802	0.207994	0.755602	0.881709	0.41732	0.428356	0.93591	0.999159	0.00941408	0.0197017	0.24326	0.28815	0.0137734	0.0787942	0.0310087	0.935819	0.96198	0.635169	0.0550793	0.0484982	0.50165	0.0792873	0.202294	0.944208	-5.47136
CCC(=O)Nc1cc2c(Nc3ccc(F)c(Cl)c3)ncnc2cc1OCCCN1CCOCC1	CHEMBL3957801	509	nM	6.29328	487.179	7	2	4.6155	TRUE	487.963	4.6155	7	2	4	0.425732	0	88.61	0.440724	0.734101	0.818738	0.188688	0.497794	0.167545	0.369976	0.278811	0.312803	0.792534	0.90266	0.268546	0.811754	0.921873	0.99598	0.0142167	0.0169708	0.585781	0.30203	0.0712949	0.0848618	0.049721	0.821365	0.800681	0.650111	0.0935184	0.0859723	0.380311	0.499708	0.186431	0.933609	-4.86399
CC(=O)N1N=C(c2ccc(C(F)(F)F)cc2)CC1c1ccc(C(=O)OCCn2c([N+](=O)[O-])cnc2C)cc1	CHEMBL3746557	510	nM	6.29243	529.157	8	0	4.67312	TRUE	529.475	4.67312	8	0	3	0.2492	1	119.93	0.59806	0.843366	0.753386	0.0707133	0.842519	0.0551467	0.834973	0.0207599	0.283055	0.874738	0.735903	0.288719	0.0780975	0.778532	0.999196	0.0150441	0.0183514	0.0538503	0.529571	0.028801	0.0858848	0.0236304	0.936143	0.979622	0.566605	0.0359775	0.101098	0.667483	0.0679078	0.285096	0.881067	-5.22136
C[C@@H](c1cccc(F)c1)n1ncc2cc(Nc3ncnn4ccc(COC[C@@H]5CNCCO5)c34)ccc21	CHEMBL397122	510	nM	6.29243	501.229	9	2	4.076	TRUE	501.566	4.076	9	2	3	0.331205	2	90.53	0.435677	0.637214	0.883637	0.103193	0.572739	0.150761	0.436811	0.161129	0.191423	0.750867	0.989017	0.22754	0.709556	0.926656	0.999278	0.00889055	0.019457	0.285169	0.432781	0.0245159	0.0810804	0.0438173	0.841648	0.83647	0.664991	0.0541557	0.0383543	0.39574	0.174766	0.138163	0.960232	-5.39341
C=CC(=O)N1CCC([C@@H]2CCNc3c(C(N)=O)c(-c4ccc(Oc5ccccc5)cc4)nn32)CC1	CHEMBL3936761	530	nM	6.27572	471.227	6	2	4.2226	TRUE	471.561	4.2226	6	2	4	0.524184	1	102.48	0.288025	0.741374	0.830029	0.119459	0.620882	0.300875	0.760847	0.245207	0.0783856	0.83563	0.746886	0.177285	0.477329	0.912978	0.998392	0.0244609	0.0351678	0.15454	0.143308	0.0494898	0.182711	0.0804019	0.912919	0.843546	0.761779	0.161621	0.197277	0.425927	0.470007	0.171437	0.844307	-5.1646
COCC(=O)NCC#Cc1ccc2ncnc(Nc3ccc(OC4CCN(C(=O)C5CCCO5)CC4)c(C)c3)c2c1	CHEMBL230680	550	nM	6.25964	557.264	8	2	3.34472	TRUE	557.651	3.34472	8	2	3	0.405581	1	114.91	0.332833	0.410922	0.67641	0.0314274	0.374543	0.145635	0.446782	0.144888	0.0465316	0.898945	0.75241	0.110793	0.345921	0.933865	0.99658	0.00846465	0.0133725	0.188102	0.140406	0.0578666	0.166805	0.045683	0.906629	0.854527	0.74619	0.104152	0.213216	0.250885	0.382564	0.166777	0.844983	-5.09383
CNC(=O)CCN1CCC(Oc2cc3c(Nc4cccc(Cl)c4F)ncnc3cc2OC)CC1	CHEMBL2408054	550	nM	6.25964	487.179	7	2	4.1538	TRUE	487.963	4.1538	7	2	4	0.49301	0	88.61	0.26867	0.897925	0.833261	0.18056	0.355297	0.136971	0.170121	0.423573	0.446412	0.83793	0.83205	0.128207	0.760716	0.826018	0.999025	0.0175346	0.0141714	0.499244	0.122633	0.0305505	0.0916823	0.0179826	0.92853	0.736066	0.534824	0.0601743	0.0366564	0.100097	0.155202	0.121279	0.915697	-5.12559
CCC(=O)Nc1cc2c(Nc3ccc4c(c3)CCN4Cc3ccccc3)ncnc2cc1OC	CHEMBL3904205	556	nM	6.25493	453.216	6	2	5.2932	TRUE	453.546	5.2932	6	2	3	0.395678	0	79.38	0.548293	0.556586	0.781266	0.602105	0.913526	0.282503	0.744643	0.231263	0.478065	0.79684	0.850026	0.23859	0.234009	0.933668	0.998675	0.0226734	0.02267	0.795888	0.414571	0.0540147	0.154518	0.0881809	0.884977	0.971937	0.804175	0.234344	0.399092	0.76244	0.653202	0.242463	0.94153	-5.1401
COc1cc2ncnc(N[C@@H](C)c3ccc(Cl)cc3)c2cc1OCCCCCCC(=O)NO	CHEMBL598407	556.9	nM	6.25422	472.188	7	3	5.2996	TRUE	472.973	5.2996	7	3	3	0.186414	1	105.6	0.78027	0.689958	0.894598	0.531708	0.914069	0.189821	0.769456	0.23328	0.5815	0.879014	0.967005	0.269448	0.598443	0.823837	0.999416	0.00753885	0.0149532	0.626175	0.372285	0.0580493	0.111097	0.0366816	0.898582	0.927158	0.74949	0.0951885	0.103048	0.44522	0.396819	0.256538	0.922723	-5.49091
CO/N=C/c1c(N)ncnc1Nc1cccc(Br)c1	CHEMBL402149	557	nM	6.25414	321.023	6	2	2.5452	TRUE	322.166	2.5452	6	2	4	0.667295	0	85.42	0.403911	0.882795	0.934585	0.888994	0.56845	0.140612	0.059842	0.185064	0.229411	0.350273	0.545646	0.20585	0.0582341	0.857523	0.999826	0.00863218	0.0375706	0.892104	0.143504	0.0203823	0.271901	0.00595324	0.837168	0.110795	0.320983	0.106644	0.123021	0.220422	0.0573993	0.542765	0.319452	-4.89456
Nc1cccc(Oc2cc(Nc3ccc(OCc4cccc(F)c4)c(Cl)c3)ncn2)c1	CHEMBL1928945	559	nM	6.25259	436.11	6	2	5.9662	TRUE	436.874	5.9662	6	2	3	0.34736	0	82.29	0.44285	0.52964	0.920149	0.479428	0.944418	0.290884	0.719592	0.120709	0.459006	0.717629	0.912621	0.454231	0.167172	0.959789	0.999613	0.003013	0.0119651	0.739109	0.495689	0.0348464	0.164938	0.0799018	0.705267	0.683147	0.606047	0.0288212	0.150116	0.587761	0.189594	0.150156	0.867142	-5.2528
Fc1cccc(COc2ccc(Nc3ncnn4ccc(COC[C@@H]5CNCCO5)c34)cc2Cl)c1	CHEMBL246493	560	nM	6.25181	497.163	8	2	4.3494	TRUE	497.958	4.3494	8	2	4	0.355564	1	81.94	0.372846	0.52044	0.913245	0.2113	0.748919	0.202694	0.566478	0.208847	0.152311	0.769345	0.978843	0.258358	0.491108	0.956189	0.999591	0.00550138	0.010606	0.492234	0.529316	0.0337711	0.0886993	0.145803	0.797938	0.89409	0.803594	0.0585465	0.105981	0.516859	0.268681	0.154866	0.916088	-5.25807
CN(C)CCCOCc1ccn2ncnc(Nc3ccc4c(cnn4Cc4cccc(F)c4)c3)c12	CHEMBL245868	560	nM	6.25181	473.234	8	1	4.4783	TRUE	473.556	4.4783	8	1	4	0.301724	0	72.51	0.511438	0.879595	0.843247	0.166589	0.383433	0.152762	0.169857	0.368442	0.61253	0.872092	0.924112	0.460079	0.773462	0.705863	0.994664	0.0178736	0.0250848	0.270909	0.303233	0.0222142	0.0472105	0.0117882	0.855484	0.973529	0.560032	0.0281234	0.0370518	0.154095	0.0559844	0.215256	0.988823	-5.51108
CCOc1cccc(Nc2ccnc3[nH]c4ccc(S(=O)(=O)N5CCNCC5)cc4c23)c1	CHEMBL3133829	576	nM	6.23958	451.168	6	3	3.4523	TRUE	451.552	3.4523	6	3	4	0.415293	0	99.35	0.0936134	0.430026	0.807861	0.828238	0.850816	0.583493	0.818782	0.555609	0.33492	0.697814	0.959757	0.240029	0.355254	0.97861	0.999415	0.0240567	0.0365255	0.479261	0.235103	0.0286884	0.0660909	0.0619348	0.854948	0.354586	0.533634	0.0376761	0.0534315	0.642329	0.363017	0.143361	0.943205	-5.14107
Fc1cccc(Cn2ncc3cc(Nc4ncnn5ccc(COC[C@@H]6COCCN6)c45)ccc32)c1	CHEMBL246492	590	nM	6.22915	487.213	9	2	3.515	TRUE	487.539	3.515	9	2	4	0.346175	1	90.53	0.378775	0.65865	0.880092	0.132889	0.659359	0.175454	0.468189	0.165827	0.232881	0.730641	0.986155	0.222261	0.697755	0.938434	0.999248	0.00793533	0.018181	0.365074	0.358397	0.0198707	0.0726043	0.0438246	0.830695	0.843388	0.656566	0.0464222	0.0400638	0.320565	0.161636	0.155017	0.963261	-5.34493
C#Cc1cccc(Nc2ncnc3ccc(-c4cnn(C)c4)cc23)c1	CHEMBL3828021	590	nM	6.22915	325.133	5	1	3.7552	TRUE	325.375	3.7552	5	1	4	0.582841	0	55.63	0.876107	0.717044	0.971771	0.987095	0.300874	0.500343	0.0409075	0.388989	0.381552	0.633249	0.959684	0.293374	0.272359	0.960114	0.999849	0.221496	0.246184	0.879308	0.464442	0.220874	0.492308	0.0628382	0.937512	0.317304	0.639814	0.594517	0.0761904	0.400936	0.568163	0.209768	0.783239	-4.87027
O=S1(=O)N=S(c2ccc(Br)cc2)c2ccncc21	CHEMBL2205030	590	nM	6.22915	341.913	3	0	2.7663	TRUE	343.227	2.7663	3	0	4	0.800002	1	59.39	0.0170247	0.731316	0.894654	0.419357	0.618089	0.540951	0.457818	0.0756181	0.07876	0.447399	0.457185	0.289402	0.0610364	0.971448	0.999868	0.0189053	0.044733	0.117652	0.0577469	0.0143656	0.0951787	0.0119407	0.932005	0.196608	0.308594	0.00698692	0.0257077	0.39407	0.0163073	0.389755	0.118239	-4.69533
C=CC(=O)Nc1cccc(-c2c(-c3ccc(N4CCN(C)CC4)cc3)[nH]c3ncn(C(C)C)c(=O)c23)c1	CHEMBL4759651	592	nM	6.22768	496.259	6	2	4.5158	TRUE	496.615	4.5158	6	2	4	0.383631	0	86.26	0.282216	0.460932	0.627938	0.203752	0.390471	0.388939	0.340019	0.271697	0.0650977	0.720105	0.516375	0.371922	0.632928	0.962803	0.942417	0.0303444	0.025734	0.23208	0.149881	0.0325449	0.0585114	0.0384934	0.702199	0.801786	0.513991	0.161609	0.128278	0.479946	0.38743	0.273744	0.899423	-4.98529
CCN(CC)CC#CC(=O)Nc1cc2c(Nc3ccc(F)c(Cl)c3)ncnc2cn1	CHEMBL202425	597	nM	6.22403	426.137	6	2	3.8446	TRUE	426.883	3.8446	6	2	4	0.5825	0	83.04	0.704353	0.816235	0.788231	0.604684	0.526571	0.231216	0.472264	0.304872	0.528897	0.645926	0.751132	0.358146	0.83629	0.906717	0.99298	0.0871388	0.0262619	0.783275	0.265879	0.0934772	0.139259	0.236359	0.888999	0.733195	0.682786	0.368535	0.297793	0.482223	0.605358	0.367678	0.823964	-4.83438
CC(=O)N1CCN(Cc2ccn3ncnc(Nc4ccc5c(cnn5Cc5cccc(F)c5)c4)c23)CC1	CHEMBL231885	610	nM	6.21467	498.229	8	1	3.6741	TRUE	498.566	3.6741	8	1	4	0.3847	0	83.59	0.19738	0.825212	0.667934	0.14544	0.730788	0.35546	0.613372	0.343315	0.516351	0.832431	0.936607	0.338111	0.704838	0.929086	0.998343	0.0121084	0.020481	0.18534	0.102245	0.0152609	0.050761	0.0159192	0.886837	0.911252	0.675496	0.0177073	0.016791	0.141325	0.0570462	0.187672	0.970411	-5.45653
Clc1ccc(-c2nnc(Cc3nc4ccccc4[nH]3)o2)cc1	CHEMBL4103370	610	nM	6.21467	310.062	4	1	3.8571	TRUE	310.744	3.8571	4	1	4	0.623703	0	67.6	0.1961	0.73941	0.902751	0.926238	0.915423	0.210451	0.618798	0.0911169	0.465144	0.708059	0.617193	0.111272	0.166284	0.948431	0.999833	0.00550112	0.0166322	0.792863	0.192719	0.0411278	0.186049	0.071936	0.924286	0.226969	0.460176	0.125544	0.207351	0.112576	0.0788366	0.313915	0.317032	-4.81129
O=C(NCCN1CCCC1)c1cc2cnnc(Nc3ccc(OCc4cccc(F)c4)c(Cl)c3)c2[nH]1	CHEMBL1080272	620	nM	6.20761	508.179	6	3	4.8986	TRUE	508.985	4.8986	6	3	3	0.297551	0	95.17	0.438128	0.666499	0.852371	0.55378	0.550227	0.250258	0.545856	0.553624	0.666342	0.763151	0.90016	0.45199	0.797425	0.888625	0.997676	0.0103501	0.00874491	0.587713	0.144611	0.0142916	0.0784613	0.0285606	0.717198	0.935119	0.553556	0.0853939	0.0715771	0.537151	0.255318	0.276734	0.970878	-5.48842
Cc1ccc(C2=N/C(=C/c3ccc(Cl)cc3)C(=O)NN2C(=O)Cc2nc3c(c(C)nn3-c3ccccc3)c(=O)[nH]2)cc1	CHEMBL4759405	633.7	nM	6.19812	577.163	7	2	4.28284	TRUE	578.032	4.28284	7	2	3	0.301601	0	125.34	0.075773	0.253814	0.890503	0.0334326	0.851846	0.598785	0.909929	0.032248	0.0349199	0.784134	0.775086	0.65864	0.213442	0.985169	0.996218	0.00187181	0.00758246	0.130143	0.153241	0.00742742	0.043623	0.146348	0.667647	0.964522	0.667349	0.0816835	0.0937841	0.619006	0.0690586	0.166391	0.801805	-5.90918
COCCN(C)C/C=C/C(=O)Nc1ccc2ncnc(Nc3cccc(Br)c3)c2c1	CHEMBL442754	634	nM	6.19791	469.111	6	2	4.2088	TRUE	470.371	4.2088	6	2	4	0.456556	0	79.38	0.726529	0.949742	0.834543	0.65725	0.568729	0.212155	0.160221	0.359635	0.735352	0.72307	0.818592	0.317913	0.809555	0.866781	0.996512	0.0604354	0.0244452	0.599137	0.175176	0.0438346	0.0920821	0.0570466	0.91049	0.876974	0.503536	0.15279	0.161135	0.221726	0.416144	0.303044	0.90166	-5.24516
CCC(=O)Nc1cc2c(Nc3ccc4c(ccn4Cc4ccccn4)c3)ncnc2cc1OC	CHEMBL3968839	642	nM	6.19246	452.196	7	2	5.1285	TRUE	452.518	5.1285	7	2	3	0.355612	0	93.96	0.418212	0.343026	0.84463	0.425119	0.67761	0.294918	0.412075	0.169821	0.238794	0.775189	0.913113	0.204742	0.331915	0.957932	0.997298	0.0290078	0.0306504	0.727259	0.313733	0.043327	0.123401	0.06653	0.89295	0.843306	0.684883	0.168711	0.171013	0.557653	0.621886	0.136342	0.916336	-5.22925
Oc1ccc(CN(Cc2cccc(Br)c2O)C(=S)Nc2ccccc2)cc1	CHEMBL604042	660	nM	6.18046	442.035	3	3	5.2595	TRUE	443.366	5.2595	3	3	3	0.470052	0	55.73	0.118915	0.416764	0.537293	0.911688	0.980129	0.418473	0.954575	0.218055	0.780741	0.654346	0.75058	0.451217	0.0127805	0.590815	0.999731	0.00458002	0.00363145	0.140705	0.350353	0.132882	0.330979	0.416729	0.780255	0.642646	0.73895	0.00830788	0.843532	0.953407	0.488254	0.835396	0.914284	-5.36624
COc1cc2ncnc(Nc3cccc(Cl)c3F)c2cc1OC1CCN(CC(=O)N(C)C)CC1	CHEMBL2408049	670	nM	6.17393	487.179	7	1	4.1059	TRUE	487.963	4.1059	7	1	4	0.536948	0	79.82	0.169442	0.941216	0.854941	0.178583	0.589994	0.247248	0.326324	0.349419	0.269064	0.882585	0.908501	0.0939103	0.70167	0.903365	0.999752	0.00654921	0.00954001	0.45074	0.10385	0.0125942	0.0460406	0.0160347	0.979938	0.808525	0.52879	0.0326957	0.0216217	0.0689549	0.0687261	0.0936456	0.902368	-4.83697
CN1CCN(C/C=C/C(=O)N2CCOc3cc4ncnc(Nc5ccc(F)c(Cl)c5)c4cc32)CC1	CHEMBL4549542	674	nM	6.17134	496.179	7	1	3.6949	TRUE	496.974	3.6949	7	1	4	0.539842	0	73.83	0.519574	0.857764	0.774992	0.240613	0.476591	0.449019	0.236495	0.45582	0.36913	0.746543	0.7916	0.444562	0.829697	0.962952	0.993118	0.0164656	0.017297	0.268344	0.065787	0.0228902	0.0635878	0.047082	0.894906	0.840639	0.571059	0.0336866	0.0642981	0.143495	0.186522	0.304752	0.929719	-4.83885
Cn1cc(-c2ccc3ncnc(Nc4ccc(F)c(Cl)c4)c3c2)cn1	CHEMBL3828269	676	nM	6.17005	353.084	5	1	4.5664	TRUE	353.788	4.5664	5	1	4	0.586014	0	55.63	0.566868	0.769604	0.975017	0.971195	0.532765	0.390764	0.0833926	0.326594	0.190752	0.695706	0.886543	0.312865	0.240873	0.976266	0.999958	0.0680287	0.0912735	0.914801	0.708683	0.156137	0.284512	0.092131	0.952349	0.580447	0.780679	0.457754	0.0942752	0.471858	0.400434	0.157013	0.714133	-4.769
CCc1c(CC(=O)O)cn2ncnc(Nc3ccc4c(cnn4Cc4ccccc4)c3)c12	CHEMBL372692	680	nM	6.16749	426.18	7	2	4.0604	TRUE	426.48	4.0604	7	2	4	0.407335	0	97.34	0.102909	0.642363	0.907851	0.222852	0.360787	0.448141	0.488248	0.0465279	0.12626	0.278065	0.310624	0.297459	0.40476	0.965822	0.968395	0.0152784	0.0435375	0.182873	0.171033	0.0251142	0.129361	0.283364	0.420956	0.40168	0.482473	0.0485577	0.0312144	0.173537	0.108044	0.163164	0.437768	-5.8721
COc1cccc(Nc2ccnc3[nH]c4ccc(S(=O)(=O)N5CCN(CCO)CC5)cc4c23)c1	CHEMBL3133830	689	nM	6.16178	481.178	7	3	2.7669	TRUE	481.578	2.7669	7	3	4	0.372242	0	110.79	0.094775	0.296387	0.676162	0.58158	0.60296	0.519705	0.568293	0.594489	0.353432	0.633756	0.920443	0.207823	0.600291	0.952121	0.998517	0.0311015	0.0357096	0.551184	0.091799	0.0192306	0.0380686	0.0182427	0.738058	0.38517	0.284101	0.0206904	0.0215239	0.536141	0.280513	0.105644	0.975862	-5.2523
NC(=O)Nc1ccc2ncnc(Nc3ccc(Oc4ccc(Cl)c(Cl)c4)c(Cl)c3)c2c1	CHEMBL3633775	706	nM	6.1512	473.021	5	3	6.6165	TRUE	474.735	6.6165	5	3	3	0.301649	0	102.16	0.373318	0.680158	0.967575	0.730662	0.717849	0.455779	0.506067	0.199948	0.255796	0.576173	0.634136	0.498352	0.4117	0.975353	0.999	0.0144355	0.0376145	0.764648	0.208782	0.0224715	0.117069	0.154656	0.785551	0.722071	0.568269	0.131882	0.157708	0.773396	0.45051	0.121907	0.768285	-4.95361
Fc1cccc(COc2ccc(Nc3ncnc4cc(-c5ccco5)sc34)cc2Cl)c1	CHEMBL479800	709	nM	6.14935	451.056	6	1	7.0664	TRUE	451.91	7.0664	6	1	3	0.299	0	60.18	0.418606	0.440972	0.83465	0.88104	0.944347	0.339919	0.790839	0.0668835	0.444499	0.583906	0.863051	0.265278	0.0332198	0.973794	0.999909	0.0146248	0.0228123	0.822188	0.582933	0.0376726	0.370578	0.285446	0.767424	0.955529	0.92962	0.121632	0.592922	0.826293	0.3829	0.279308	0.853976	-5.08888
Cc1nc(Nc2ncc(C(=O)Nc3c(C)cccc3Cl)s2)cc(N2CCN(CCO)CC2)n1	CHEMBL1421	710	nM	6.14874	487.156	9	3	3.31354	TRUE	488.017	3.31354	9	3	4	0.465717	0	106.51	0.375843	0.492672	0.709886	0.12145	0.461486	0.408364	0.278507	0.383647	0.197863	0.612511	0.511831	0.300627	0.753406	0.894129	0.995878	0.0119458	0.0192066	0.431277	0.0943488	0.0102728	0.0571808	0.0205249	0.826693	0.933737	0.458029	0.0177838	0.0662104	0.457655	0.102879	0.348957	0.933132	-5.45868
CNC(=O)c1ccccc1Nc1nc(Nc2ccc(N3CCOCC3)cc2OC)ncc1Cl	CHEMBL458997	710	nM	6.14874	468.168	8	3	3.822	TRUE	468.945	3.822	8	3	4	0.480823	0	100.64	0.256428	0.428333	0.916349	0.236401	0.592103	0.265463	0.498382	0.0934665	0.0507148	0.673125	0.731374	0.228533	0.273495	0.988093	0.999129	0.00497324	0.00957258	0.702202	0.346891	0.0159762	0.0476109	0.0532004	0.940854	0.670758	0.798378	0.091419	0.12417	0.713915	0.443698	0.241807	0.856219	-5.10724
N#Cc1ccc(Oc2ccc(Nc3ncnc4cc[nH]c34)cc2Cl)cc1	CHEMBL1922903	720	nM	6.14267	361.073	5	2	5.01888	TRUE	361.792	5.01888	5	2	3	0.532644	0	86.62	0.563151	0.424663	0.927679	0.941502	0.733009	0.192566	0.510037	0.214372	0.278246	0.653361	0.817449	0.230818	0.189174	0.982093	0.999798	0.0208771	0.0304308	0.931194	0.785771	0.146117	0.244322	0.137595	0.845157	0.606549	0.816046	0.521902	0.282937	0.908268	0.827146	0.181703	0.843302	-5.1853
CCc1c(CO)cn2ncnc(Nc3ccc4c(cnn4Cc4ccccc4)c3)c12	CHEMBL373025	730	nM	6.13668	398.186	7	2	3.9256	TRUE	398.47	3.9256	7	2	4	0.453063	0	80.27	0.285231	0.602149	0.839195	0.536761	0.771877	0.365529	0.645292	0.198145	0.330891	0.622481	0.795522	0.328261	0.242498	0.917008	0.999465	0.022559	0.0383535	0.494789	0.528467	0.0228667	0.151037	0.0697855	0.833486	0.917075	0.604447	0.0705474	0.0724652	0.691803	0.191333	0.171324	0.91888	-5.54619
COC[C@H]1CCCN1C/C=C/C(=O)Nc1ccc2ncnc(Nc3cccc(Br)c3)c2c1	CHEMBL419501	733	nM	6.1349	495.127	6	2	4.7414	TRUE	496.409	4.7414	6	2	4	0.438927	1	79.38	0.643831	0.940793	0.79373	0.533061	0.547501	0.116328	0.256934	0.359677	0.743298	0.713329	0.809836	0.221667	0.840587	0.833683	0.997737	0.0421101	0.0193925	0.634089	0.152541	0.0413188	0.11812	0.0324267	0.910703	0.884833	0.631621	0.145071	0.164681	0.226498	0.392343	0.335112	0.940813	-5.2596
c1ccc(Oc2ccc(Nc3ccnc4ccccc34)cc2)cc1	CHEMBL521284	733	nM	6.1349	312.126	3	1	5.7707	TRUE	312.372	5.7707	3	1	3	0.519121	0	34.15	0.845709	0.754579	0.913651	0.940793	0.86217	0.400972	0.471827	0.359438	0.471354	0.596628	0.471859	0.429686	0.115691	0.938102	0.99988	0.0204249	0.0370257	0.897574	0.501581	0.133097	0.541647	0.131205	0.893068	0.612236	0.869107	0.180761	0.328759	0.872706	0.468719	0.555379	0.847885	-4.76682
Cc1ncnc(Nc2ccc(OCc3cccc(F)c3)c(Cl)c2)c1/C=N/OCCN1CCOCC1	CHEMBL1683958	740	nM	6.13077	499.179	8	1	4.58282	TRUE	499.974	4.58282	8	1	4	0.248196	0	81.1	0.340328	0.623861	0.807791	0.0903226	0.82796	0.167532	0.436536	0.257856	0.33227	0.873179	0.96728	0.295075	0.533058	0.804961	0.997415	0.00400079	0.01389	0.475901	0.231354	0.0408677	0.0737933	0.0320944	0.782448	0.968411	0.70974	0.0493216	0.269068	0.355244	0.136845	0.20961	0.927772	-4.92965
O=C1CCN(Cc2ccn3ncnc(Nc4ccc5c(cnn5Cc5cccc(F)c5)c4)c23)CCN1	CHEMBL233324	750	nM	6.12494	484.214	8	2	3.3319	TRUE	484.539	3.3319	8	2	4	0.384208	0	92.38	0.288778	0.77709	0.754246	0.169098	0.564556	0.242988	0.460975	0.260706	0.520998	0.76593	0.91767	0.328265	0.722618	0.91865	0.997197	0.0158287	0.0253521	0.166265	0.134805	0.017746	0.0746941	0.0212135	0.807278	0.823907	0.588128	0.0329728	0.0216785	0.189738	0.13131	0.185417	0.951756	-5.64334
Cc1ncnc(Nc2ccc(OCc3cccc(F)c3)c(Cl)c2)c1C#Cc1ccccc1	CHEMBL1934621	750	nM	6.12494	443.12	4	1	6.29992	TRUE	443.909	6.29992	4	1	3	0.367545	0	47.04	0.269773	0.278064	0.873046	0.35089	0.92969	0.387095	0.796056	0.0675554	0.228353	0.82603	0.749127	0.525866	0.0444622	0.924234	0.999831	0.00341555	0.00852688	0.522038	0.585727	0.0473246	0.193336	0.24145	0.715989	0.971042	0.822686	0.0337439	0.662659	0.840662	0.329078	0.203905	0.81943	-5.08869
C#Cc1cccc(Nc2ncnc3cc(OCCOC)c(OCCOC)cc23)c1	CHEMBL553	760	nM	6.11919	393.169	7	1	3.4051	TRUE	393.443	3.4051	7	1	4	0.417884	0	74.73	0.769121	0.728864	0.931615	0.598984	0.238846	0.305411	0.177407	0.389836	0.131553	0.7096	0.873562	0.346907	0.327403	0.934352	0.995098	0.0374582	0.0791319	0.815989	0.39298	0.0652555	0.120145	0.0400249	0.850905	0.71305	0.728045	0.294247	0.101808	0.350382	0.394313	0.280887	0.923616	-4.73845
Nc1ncnc(Nc2ccc(OCc3ccccc3)c(Cl)c2)c1C(=O)O	CHEMBL512391	776	nM	6.11014	370.083	6	3	3.733	TRUE	370.796	3.733	6	3	4	0.605783	0	110.36	0.342568	0.386886	0.956309	0.217182	0.360231	0.255563	0.26671	0.0202692	0.0981492	0.0926292	0.100735	0.372422	0.192813	0.985871	0.989769	0.0105417	0.0510028	0.583083	0.242719	0.0664093	0.30325	0.163583	0.333591	0.0636453	0.422249	0.155151	0.0669414	0.359568	0.118902	0.266939	0.135068	-5.33822
Nc1ncnc(Nc2ccc(OCc3ccccc3)c(Cl)c2)c1C(=O)Nc1ccccc1	CHEMBL461114	776	nM	6.11014	445.131	6	3	5.2871	TRUE	445.91	5.2871	6	3	3	0.357064	0	102.16	0.566454	0.498795	0.898728	0.330893	0.923645	0.456084	0.838647	0.0873762	0.225185	0.646187	0.559299	0.626114	0.178547	0.967045	0.998219	0.00304966	0.0107201	0.672898	0.425221	0.0322165	0.193267	0.128609	0.772919	0.804759	0.680634	0.0428773	0.24549	0.736499	0.210439	0.284412	0.86585	-5.31326
Fc1cccc(COc2ccc(Nc3ncncc3C#Cc3ccccc3)cc2Cl)c1	CHEMBL379093	780	nM	6.10791	429.104	4	1	5.9915	TRUE	429.882	5.9915	4	1	3	0.395605	0	47.04	0.299646	0.348184	0.846094	0.647836	0.959467	0.358106	0.863116	0.0853826	0.399403	0.733256	0.881979	0.415486	0.0656053	0.940433	0.999904	0.00347776	0.00829279	0.698718	0.67031	0.0560556	0.230031	0.272909	0.725621	0.925641	0.817683	0.0422241	0.648891	0.822659	0.353258	0.226759	0.841437	-5.08383
CCC(=O)Nc1cc2c(Nc3ccc4c(ccn4Cc4ccco4)c3)ncnc2cc1OC	CHEMBL3964380	782	nM	6.10679	441.18	7	2	5.3265	TRUE	441.491	5.3265	7	2	3	0.354683	0	94.21	0.469524	0.334622	0.781388	0.756313	0.904918	0.248978	0.586377	0.135802	0.466026	0.706153	0.961174	0.165551	0.152811	0.972623	0.9992	0.0245007	0.0255332	0.779755	0.472968	0.0461372	0.164252	0.0854523	0.890727	0.900729	0.797345	0.195164	0.289412	0.726015	0.617235	0.160072	0.938155	-5.08163
CCC(=O)Nc1cc2c(Nc3ccc(NS(=O)(=O)c4ccccc4)cc3)ncnc2cc1OC	CHEMBL3970738	798	nM	6.098	477.147	7	3	4.5313	TRUE	477.546	4.5313	7	3	4	0.340679	0	122.31	0.0781696	0.37833	0.910326	0.41166	0.633178	0.655563	0.785653	0.14078	0.110269	0.610719	0.839635	0.408356	0.216346	0.991575	0.993995	0.0155674	0.0490931	0.123348	0.0752768	0.00666939	0.0445091	0.0312097	0.846405	0.640781	0.294393	0.024551	0.0375371	0.479458	0.183744	0.084308	0.858738	-5.29339
CCC(=O)Nc1cc2c(Nc3ccc4[nH]ccc4c3)ncnc2cc1OC	CHEMBL3963723	800	nM	6.09691	361.154	5	3	4.2118	TRUE	361.405	4.2118	5	3	4	0.495107	0	91.93	0.568486	0.565758	0.866833	0.944998	0.565834	0.299925	0.197911	0.390039	0.31428	0.640447	0.865749	0.0773452	0.153737	0.970896	0.999669	0.0472944	0.042587	0.944456	0.290516	0.086088	0.257975	0.0252801	0.912501	0.467423	0.597172	0.463489	0.128266	0.719684	0.725198	0.201401	0.870764	-5.14517
CCC(=O)Nc1cc2c(Nc3ccc(OCc4ccccn4)cc3)ncnc2cc1OC	CHEMBL3925158	815	nM	6.08884	429.18	7	2	4.7045	TRUE	429.48	4.7045	7	2	4	0.418668	0	98.26	0.483178	0.32845	0.891504	0.336526	0.590925	0.31037	0.33561	0.159853	0.141732	0.775538	0.876425	0.217597	0.293002	0.956862	0.993621	0.0210453	0.0403242	0.689657	0.281364	0.047414	0.129882	0.0519025	0.896556	0.723209	0.676687	0.191903	0.13967	0.452782	0.562461	0.135807	0.861601	-5.19913
Cc1cccc(-c2ccc3c(ccn3Cc3coc(/C=C/c4ccc(C(F)(F)F)cc4)n3)c2)c1	CHEMBL5201807	820	nM	6.08619	458.161	3	0	7.84222	TRUE	458.483	7.84222	3	0	3	0.268578	0	30.96	0.227746	0.714015	0.84881	0.359588	0.66803	0.315534	0.237747	0.0955418	0.064143	0.773272	0.386787	0.620125	0.0848355	0.923629	0.999768	0.0212269	0.0174673	0.536276	0.400347	0.11234	0.293365	0.132072	0.80914	0.988313	0.92244	0.0561088	0.251692	0.770146	0.3049	0.217512	0.925839	-5.05179
CCOC(=O)c1cn2ncnc(Nc3ccc(Oc4ccccc4)cc3)c2c1CC	CHEMBL194349	820	nM	6.08619	402.169	7	1	5.0043	TRUE	402.454	5.0043	7	1	3	0.43823	0	77.75	0.139104	0.67983	0.895147	0.761549	0.942218	0.392896	0.897029	0.136996	0.153388	0.646833	0.706032	0.277727	0.0937476	0.958504	0.999848	0.0113541	0.0374436	0.44508	0.338497	0.0439155	0.169979	0.104735	0.957861	0.922376	0.577698	0.0987197	0.0956071	0.643888	0.142365	0.19116	0.816988	-5.04158
Cc1c(C(=O)NCCN2CCN(C)CC2)[nH]c2cnnc(Nc3ccc(OCc4cccc(F)c4)c(Cl)c3)c12	CHEMBL1082012	843	nM	6.07417	551.221	7	3	4.35862	TRUE	552.054	4.35862	7	3	3	0.284216	0	98.41	0.433535	0.602476	0.849015	0.305073	0.596281	0.379621	0.43241	0.576186	0.624871	0.84139	0.942817	0.556452	0.840355	0.928834	0.997815	0.00526284	0.00722518	0.336338	0.0865943	0.0101064	0.0436011	0.0198353	0.768959	0.954572	0.528964	0.0250193	0.0292873	0.380733	0.134052	0.261229	0.978733	-5.4021
C[C@@H](c1ccccc1)n1ncc2cc(Nc3ncnn4ccc(COC[C@@H]5CNCCO5)c34)ccc21	CHEMBL245277	850	nM	6.07058	483.238	9	2	3.9369	TRUE	483.576	3.9369	9	2	4	0.345525	2	90.53	0.43918	0.655061	0.841934	0.15526	0.587043	0.144586	0.446913	0.161394	0.219939	0.668163	0.971328	0.175733	0.662294	0.904479	0.998643	0.00868477	0.0152207	0.361694	0.457721	0.0395983	0.100173	0.0478728	0.818957	0.802165	0.665274	0.0627839	0.0912797	0.425318	0.275372	0.228282	0.951042	-5.44284
CCNC(=O)Nc1ccc(C(=O)Nc2ccc3ncnc(Nc4ccc(F)c(Cl)c4)c3c2)cc1	CHEMBL3633941	855	nM	6.06803	478.132	5	4	5.5596	TRUE	478.915	5.5596	5	4	3	0.289978	0	108.04	0.226193	0.48446	0.852567	0.256638	0.548793	0.407624	0.447811	0.123104	0.174386	0.546657	0.617086	0.44953	0.408356	0.979739	0.981539	0.0137091	0.0265481	0.610844	0.169285	0.0190779	0.103757	0.0611559	0.684706	0.627946	0.457611	0.0746692	0.114382	0.734704	0.37189	0.192467	0.809132	-5.22113
CNC(=O)CN1CCC(Oc2cc3c(Nc4cc(Cl)ccc4F)ncnc3cc2OC)CC1	CHEMBL2408053	860	nM	6.0655	473.163	7	2	3.7637	TRUE	473.936	3.7637	7	2	4	0.539702	0	88.61	0.200784	0.925458	0.890267	0.251206	0.586209	0.233718	0.299733	0.384311	0.340598	0.846257	0.903478	0.0958355	0.721247	0.911812	0.999754	0.00659933	0.00797905	0.480633	0.084142	0.0134008	0.0529209	0.0175612	0.964663	0.703274	0.456388	0.0373181	0.0233573	0.0701682	0.0958805	0.101221	0.889949	-4.98489
Cc1cccc(NCc2coc(/C=C/c3ccc(C(F)(F)F)cc3)n2)c1	CHEMBL5189871	860	nM	6.0655	358.129	3	1	5.78432	TRUE	358.363	5.78432	3	1	3	0.627758	0	38.06	0.358876	0.879741	0.929746	0.937395	0.970548	0.333593	0.413908	0.201229	0.374982	0.704105	0.787838	0.58234	0.079193	0.8937	0.999968	0.0150893	0.0330447	0.764799	0.599357	0.169339	0.57161	0.101237	0.951005	0.763895	0.887398	0.238074	0.262756	0.926024	0.461171	0.267771	0.819394	-5.05282
COc1ccc(/C=C2/N=C(c3ccc(Cl)cc3)N(C(=O)Cc3nc4c(c(C)nn4-c4ccccc4)c(=O)[nH]3)NC2=O)cc1	CHEMBL4753913	865.7	nM	6.06263	593.158	8	2	3.98302	TRUE	594.031	3.98302	8	2	3	0.286019	0	134.57	0.0823675	0.145593	0.919893	0.0319879	0.792891	0.585507	0.919476	0.0340437	0.0305465	0.796518	0.803099	0.507904	0.140746	0.989481	0.995778	0.00151887	0.00698977	0.173677	0.103531	0.00594686	0.0356304	0.137871	0.689967	0.972483	0.624149	0.0709393	0.0965145	0.564003	0.0847838	0.0996209	0.8164	-5.88254
Cc1nn(-c2ccccc2)c2nc(CC(=O)N3NC(=O)/C(=C\c4ccccc4)N=C3c3ccccc3)[nH]c(=O)c12	CHEMBL4790553	872.3	nM	6.05933	529.186	7	2	3.32102	TRUE	529.56	3.32102	7	2	3	0.338068	0	125.34	0.0985038	0.35137	0.876692	0.0266418	0.718953	0.704926	0.89402	0.0447677	0.0242774	0.666207	0.607897	0.594784	0.247361	0.989745	0.989955	0.00277697	0.0121923	0.0980276	0.0695505	0.00559711	0.033996	0.0856411	0.678929	0.956411	0.595759	0.101566	0.0484367	0.440531	0.0569959	0.174554	0.811016	-5.97182
Cn1cc(-c2ccc3ncnc(Nc4ccc5ncccc5c4)c3c2)cn1	CHEMBL3828079	874	nM	6.05849	352.144	6	1	4.3221	TRUE	352.401	4.3221	6	1	4	0.523553	0	68.52	0.681172	0.55447	0.957498	0.939183	0.168561	0.372126	0.024416	0.304076	0.161997	0.603108	0.843823	0.294114	0.311318	0.974851	0.999582	0.165433	0.113559	0.80664	0.489672	0.136976	0.293829	0.0801801	0.917396	0.45769	0.631624	0.404698	0.105362	0.452637	0.670484	0.151862	0.872411	-5.19438
NC(=S)N1N=C(c2ccc(Cl)c(Cl)c2)CC1c1ccc2ccccc2c1	CHEMBL2325087	880	nM	6.05552	399.036	2	1	5.5413	TRUE	400.334	5.5413	2	1	3	0.574471	1	41.62	0.213237	0.785577	0.851664	0.930977	0.930446	0.330118	0.828221	0.0880604	0.133145	0.54945	0.536352	0.536668	0.0423086	0.857099	0.999965	0.0137274	0.0123805	0.753376	0.673135	0.115354	0.267003	0.421022	0.876723	0.720932	0.797106	0.138185	0.576149	0.90585	0.199052	0.65878	0.746303	-5.10157
CC(C)Nc1ncnn2ccc(CN3CCC(N)CC3)c12	CHEMBL1645468	880	nM	6.05552	288.206	6	2	1.4727	TRUE	288.399	1.4727	6	2	4	0.89127	0	71.48	0.10966	0.989562	0.888103	0.00634396	0.00944916	0.0356832	0.00171504	0.476567	0.281954	0.309828	0.00333448	0.0748438	0.49317	0.0923489	0.999673	0.0015204	0.0156102	0.0367788	0.00365577	0.00103137	0.0500311	2.00879e-05	0.694266	0.0111693	0.015781	0.000320165	0.000560377	0.000265187	0.000433196	0.322749	0.730851	-5.22704
CCC(=O)Nc1cc2c(Nc3ccc4c(c3)CCN4Cc3ccccn3)ncnc2cc1OC	CHEMBL3960911	897	nM	6.04721	454.212	7	2	4.6882	TRUE	454.534	4.6882	7	2	4	0.418537	0	92.27	0.464769	0.421041	0.800498	0.435799	0.752117	0.260622	0.555179	0.212626	0.303004	0.797491	0.86543	0.183765	0.345926	0.932564	0.997821	0.0260005	0.0248814	0.717262	0.306746	0.0551234	0.142027	0.0675943	0.900766	0.897295	0.685022	0.182003	0.248514	0.596386	0.664283	0.174729	0.912304	-5.22176
COc1ccc(-c2nnc(Cc3nc4ccccc4[nH]3)o2)cc1	CHEMBL4084249	910	nM	6.04096	306.112	5	1	3.2123	TRUE	306.325	3.2123	5	1	4	0.626202	0	76.83	0.441712	0.613601	0.880085	0.894984	0.908436	0.253234	0.610598	0.185486	0.404594	0.712603	0.764984	0.0541919	0.10568	0.91453	0.999696	0.00235406	0.0135822	0.744301	0.114325	0.0333365	0.176779	0.0371304	0.910154	0.258246	0.314563	0.115386	0.134606	0.0686652	0.0816263	0.284966	0.503637	-4.75213
C#Cc1cccc(Nc2ncnc3cc4c(cc23)N(C(=O)/C=C/CN2CCOCC2)CCO4)c1	CHEMBL3114699	930	nM	6.03152	455.196	7	1	2.9685	TRUE	455.518	2.9685	7	1	4	0.468058	0	79.82	0.699545	0.609873	0.797277	0.21685	0.270528	0.412415	0.313112	0.219365	0.187875	0.581426	0.861986	0.349215	0.751497	0.964977	0.990519	0.0377816	0.0534415	0.373801	0.139472	0.101066	0.215375	0.101455	0.739753	0.659616	0.707512	0.191713	0.128495	0.38419	0.509423	0.333618	0.84746	-4.71091
CCOC(=O)c1[nH]c(C)c2cnnc(Nc3ccc(OCc4cccc(F)c4)c(Cl)c3)c12	CHEMBL1080990	934	nM	6.02965	454.121	6	2	5.55812	TRUE	454.889	5.55812	6	2	3	0.355339	0	89.13	0.0889353	0.434613	0.848359	0.894118	0.954065	0.231971	0.920935	0.135644	0.291228	0.682077	0.925654	0.20277	0.0394424	0.969055	0.999889	0.00587088	0.0114067	0.790692	0.249954	0.0238411	0.102178	0.0719344	0.880894	0.865622	0.447191	0.0516449	0.111078	0.818478	0.195352	0.139664	0.77237	-5.14387
CCC(=O)Nc1cc2c(Nc3ccc(NS(=O)(=O)c4ccccc4)nc3)ncnc2cc1OC	CHEMBL3923650	958	nM	6.01863	478.142	8	3	3.9263	TRUE	478.534	3.9263	8	3	4	0.346687	0	135.2	0.064633	0.34153	0.905998	0.269495	0.352356	0.635237	0.587092	0.11919	0.0694607	0.516414	0.654066	0.385148	0.28674	0.987906	0.987591	0.0226275	0.046403	0.0779728	0.0405071	0.00604132	0.0412594	0.0221506	0.839817	0.428021	0.215732	0.0166787	0.0203149	0.23007	0.136968	0.0788967	0.724581	-5.35232
Oc1cc2c(cc1O)[C@@H]1c3ccc(O)c(O)c3OC[C@]1(O)C2	CHEMBL477197	960	nM	6.01773	302.079	6	5	1.3205	TRUE	302.282	1.3205	6	5	4	0.469461	2	110.38	0.517544	0.294585	0.515428	0.169933	0.13025	0.110701	0.104959	0.0786229	0.0603362	0.661249	0.0685366	0.0258222	0.144171	0.360756	0.964968	0.070866	0.0809069	0.24815	0.126996	0.260552	0.414172	0.0110548	0.260005	0.0533571	0.152752	0.0678899	0.0477608	0.339573	0.277892	0.588459	0.217392	-5.94827
CC(=O)c1ccc2[nH]c3nccc(Nc4cccc([N+](=O)[O-])c4)c3c2c1	CHEMBL3133817	978	nM	6.00966	346.107	5	2	4.5705	TRUE	346.346	4.5705	5	2	4	0.320099	0	100.92	0.940173	0.787623	0.911415	0.981998	0.67547	0.147648	0.318262	0.201109	0.62964	0.477652	0.884439	0.1709	0.111285	0.985604	0.999979	0.143389	0.0154321	0.976299	0.365418	0.0974064	0.237191	0.030234	0.967897	0.565464	0.787459	0.257518	0.175696	0.986387	0.57535	0.652614	0.646358	-5.34664
Cc1ccccc1Nc1ccnc2[nH]c3ccccc3c12	CHEMBL3133820	978	nM	6.00966	273.127	2	2	4.76812	TRUE	273.339	4.76812	2	2	4	0.552121	0	40.71	0.910478	0.928186	0.908124	0.996597	0.847199	0.337358	0.319235	0.464626	0.794681	0.575352	0.919463	0.193689	0.10805	0.95049	0.999992	0.0886543	0.0330262	0.978389	0.552658	0.177207	0.318098	0.10906	0.954038	0.54607	0.772613	0.331946	0.393761	0.909419	0.747992	0.612903	0.880922	-5.12868
O=C(/C=C/CN1CCOCC1)N1CCOc2cc3ncnc(Nc4ccc(F)c(Cl)c4)c3cc21	CHEMBL2441561	996	nM	6.00174	483.147	7	1	3.7797	TRUE	483.931	3.7797	7	1	4	0.553067	0	79.82	0.475682	0.757489	0.860355	0.188133	0.562398	0.330729	0.45716	0.215419	0.136346	0.67996	0.77764	0.351561	0.678477	0.977868	0.996567	0.01373	0.0163895	0.484092	0.21125	0.0366356	0.108989	0.106022	0.878009	0.809864	0.710085	0.101502	0.164997	0.440734	0.418634	0.278682	0.878215	-4.69988
COc1cc2c(Nc3ccc(Cl)c(Cl)c3C)ncnc2cc1OCC1CN(C)CCO1	CHEMBL3921390	1000	nM	6	462.123	7	1	4.70662	TRUE	463.365	4.70662	7	1	4	0.568174	1	68.74	0.552187	0.836062	0.95712	0.435791	0.385139	0.214877	0.079693	0.387384	0.207591	0.771117	0.915569	0.218134	0.635106	0.959207	0.999498	0.0110302	0.0179086	0.789148	0.441549	0.0296864	0.0507892	0.048181	0.95636	0.790845	0.670787	0.108065	0.0964504	0.35295	0.272797	0.22758	0.917551	-4.6945
COc1cc2c(Nc3ccc(Br)c(Cl)c3)ncnc2cc1O[C@H]1CO[C@H]2[C@@H]1OC[C@@H]2N1CCOCC1	CHEMBL3921861	1000	nM	6	576.078	9	1	4.0437	TRUE	577.863	4.0437	9	1	3	0.466365	4	87.2	0.404384	0.648991	0.884197	0.159596	0.356208	0.0853622	0.165499	0.150602	0.135155	0.741404	0.800234	0.116827	0.517516	0.933819	0.996002	0.0235036	0.0328002	0.601788	0.486647	0.0622535	0.11896	0.0880291	0.853264	0.699838	0.749903	0.141626	0.165708	0.448467	0.536362	0.286079	0.913019	-4.92527
Cn1cc(-c2cnc3c(-c4csc(C(=O)N[C@@H]5CCCC[C@@H]5N)c4)cnn3c2)cn1	CHEMBL4568087	1000	nM	6	421.168	8	2	2.858	TRUE	421.53	2.858	8	2	4	0.527387	2	103.13	0.589292	0.513981	0.850894	0.308842	0.0620892	0.283451	0.0903095	0.212967	0.0794834	0.477244	0.730087	0.167714	0.624258	0.896158	0.990123	0.106667	0.0435311	0.149013	0.234958	0.117654	0.192535	0.0436375	0.656189	0.370937	0.233274	0.330138	0.063237	0.301863	0.335343	0.343442	0.718451	-5.77449
COC(=O)c1ccc2c(c1)S(=O)(=O)N=S2c1ccc(Br)cc1	CHEMBL1917092	1000	nM	6	398.923	4	0	3.1579	TRUE	400.275	3.1579	4	0	4	0.726441	1	72.8	0.0192198	0.645179	0.84574	0.702065	0.800114	0.560454	0.732564	0.0921122	0.0949048	0.461588	0.338362	0.437507	0.0306401	0.983371	0.999681	0.0244208	0.0578355	0.0685839	0.0147265	0.0119465	0.0982748	0.027998	0.941646	0.260272	0.193507	0.0195841	0.0177243	0.347489	0.0221633	0.366411	0.23252	-4.64979
COc1cc2c(Nc3ccc(Br)c(Cl)c3)ncnc2cc1O[C@@H]1CO[C@H]2[C@@H]1OC[C@@H]2OS(C)(=O)=O	CHEMBL3986082	1000	nM	6	584.997	10	1	3.6877	TRUE	586.848	3.6877	10	1	3	0.4108	4	118.1	0.587544	0.750938	0.925163	0.236911	0.322968	0.123945	0.289588	0.134462	0.0627683	0.644941	0.525499	0.269608	0.504077	0.975508	0.994637	0.0133649	0.0220533	0.390261	0.445412	0.0271807	0.105687	0.108007	0.892393	0.619172	0.802162	0.0924573	0.0833833	0.414741	0.476146	0.329848	0.879445	-5.09254
COc1cc2c(Nc3ccc(Cl)c(Cl)c3F)ncnc2cc1OC[C@@H]1CN(C)CC(=O)N1C	CHEMBL3909603	1000	nM	6	493.108	7	1	3.9791	TRUE	494.354	3.9791	7	1	4	0.519734	1	79.82	0.171842	0.772023	0.90915	0.101898	0.418976	0.456514	0.299705	0.21888	0.0398699	0.862521	0.950752	0.145546	0.562195	0.982425	0.999287	0.00791887	0.019227	0.474432	0.149545	0.0145956	0.0288317	0.0419599	0.968936	0.788355	0.646992	0.0345077	0.0181639	0.134774	0.153552	0.0937313	0.870862	-4.71036
COc1cc2c(Nc3ccc(Br)c(Cl)c3F)ncnc2cc1OC[C@@H]1CN(C)CC(=O)N1C	CHEMBL3891130	1000	nM	6	537.058	7	1	4.0882	TRUE	538.805	4.0882	7	1	3	0.473729	1	79.82	0.165613	0.810024	0.910697	0.112833	0.454346	0.435938	0.321399	0.23605	0.053963	0.879157	0.954336	0.147529	0.577926	0.97982	0.999422	0.00783353	0.0205997	0.490069	0.130986	0.0119203	0.0284989	0.0389263	0.972999	0.809383	0.659758	0.03307	0.0195538	0.142642	0.159003	0.0822675	0.882562	-4.74457
COc1cc2c(Nc3ccc(C)c(Cl)c3Cl)ncnc2cc1OCC1CN(C)CCO1	CHEMBL3891059	1000	nM	6	462.123	7	1	4.70662	TRUE	463.365	4.70662	7	1	4	0.568174	1	68.74	0.60823	0.788952	0.964999	0.30651	0.350308	0.200016	0.0760432	0.324684	0.123779	0.800616	0.868846	0.258523	0.595871	0.962682	0.999452	0.00886439	0.0156687	0.727297	0.435514	0.0287755	0.04621	0.0535421	0.950738	0.878085	0.698067	0.113234	0.102847	0.340482	0.260821	0.24233	0.91247	-4.70556
COc1cc2c(Nc3ccc(Cl)c(Cl)c3N3CCN(C)CC3)ncnc2cc1O[C@H]1CO[C@H]2[C@@H]1OC[C@@H]2F	CHEMBL3985116	1000	nM	6	563.15	9	1	4.3237	TRUE	564.445	4.3237	9	1	3	0.470973	4	81.21	0.45869	0.640508	0.875011	0.0597279	0.291888	0.211492	0.081172	0.184371	0.0640149	0.788958	0.803912	0.265271	0.606524	0.954343	0.99413	0.0146512	0.0232058	0.236458	0.300429	0.0454108	0.0564049	0.0855648	0.884767	0.822751	0.773032	0.0903179	0.0653554	0.271448	0.337627	0.154526	0.936009	-4.77139
COc1cc2c(Nc3ccc(N4CCN(C)C(F)C4)cc3)ncnc2cc1O[C@H]1CO[C@H]2[C@@H]1OC[C@@H]2F	CHEMBL3890300	1000	nM	6	513.219	9	1	3.3125	TRUE	513.545	3.3125	9	1	3	0.499537	5	81.21	0.678929	0.551199	0.894985	0.0374208	0.12145	0.205971	0.0326364	0.121089	0.0528254	0.740596	0.692624	0.246722	0.619007	0.957385	0.991108	0.0273949	0.0550925	0.181005	0.25557	0.0344121	0.0833611	0.0661439	0.834394	0.604562	0.700981	0.147145	0.0400654	0.197095	0.356325	0.129196	0.938391	-4.84751
COc1cc2c(Nc3cccc(Br)c3C)ncnc2cc1O[C@H]1CO[C@H]2[C@@H]1OC[C@@H]2OC	CHEMBL3895458	1000	nM	6	501.09	8	1	4.01292	TRUE	502.365	4.01292	8	1	3	0.541683	4	83.96	0.540119	0.684224	0.941815	0.17973	0.364224	0.164691	0.181099	0.148092	0.0410817	0.74876	0.649593	0.148495	0.308578	0.968127	0.997229	0.0162728	0.028421	0.580845	0.466607	0.0325006	0.113221	0.0908127	0.898915	0.606554	0.782702	0.164914	0.11677	0.346159	0.475447	0.284024	0.904171	-5.04981
COc1cc2c(Nc3ccc(Br)c(Cl)c3)ncnc2cc1O[C@H]1CO[C@H]2[C@@H]1OC[C@H]2OC	CHEMBL3929354	1000	nM	6	521.035	8	1	4.3579	TRUE	522.783	4.3579	8	1	3	0.511345	4	83.96	0.421804	0.683485	0.936185	0.309508	0.427662	0.121769	0.216727	0.146311	0.0575983	0.734531	0.624987	0.153367	0.321418	0.97025	0.99788	0.017018	0.0309565	0.675167	0.552786	0.029379	0.0903188	0.112646	0.910039	0.668582	0.819486	0.143842	0.188689	0.398506	0.503471	0.296397	0.869539	-4.98835
COc1cc2c(Nc3ccc(N4CCN(C)CC4)c(Cl)c3Cl)ncnc2cc1O[C@H]1CO[C@H]2[C@@H]1OC[C@@H]2F	CHEMBL3893058	1000	nM	6	563.15	9	1	4.3237	TRUE	564.445	4.3237	9	1	3	0.470973	4	81.21	0.497122	0.560924	0.882552	0.0464705	0.22275	0.208646	0.0699953	0.154661	0.0418588	0.777997	0.704464	0.273938	0.575338	0.963657	0.9913	0.0163116	0.0268772	0.23568	0.308735	0.0446959	0.0588761	0.0982301	0.869111	0.777171	0.781933	0.119406	0.0677971	0.281773	0.376492	0.164047	0.92804	-4.81537
COc1cc2c(Nc3ccc(Br)c(Cl)c3)ncnc2cc1OC1CCN(C)C1	CHEMBL3971560	1000	nM	6	462.046	6	1	4.8808	TRUE	463.763	4.8808	6	1	4	0.581791	1	59.51	0.41101	0.933732	0.937171	0.791842	0.289056	0.215622	0.0289506	0.659647	0.583155	0.753082	0.716338	0.164969	0.665868	0.912687	0.999637	0.0171195	0.0251025	0.692976	0.252665	0.0192509	0.0715783	0.0205933	0.96693	0.824787	0.520608	0.066388	0.0902217	0.206339	0.182791	0.219208	0.914092	-4.77454
COc1cc2c(Nc3ccc(N4CCN(C)CC4)cc3)ncnc2cc1O[C@H]1CO[C@H]2[C@@H]1OC[C@@H]2F	CHEMBL3924442	1000	nM	6	495.228	9	1	3.0169	TRUE	495.555	3.0169	9	1	4	0.555044	4	81.21	0.693666	0.547886	0.883341	0.0556779	0.0860256	0.201914	0.0186291	0.161789	0.0683387	0.735106	0.626974	0.221325	0.597451	0.951741	0.984866	0.0303867	0.0463447	0.160632	0.244332	0.0492689	0.089836	0.0637968	0.804602	0.615269	0.705179	0.159074	0.0529827	0.186526	0.390227	0.150117	0.938122	-4.85715
COc1cc2c(Nc3cccc(Cl)c3C)ncnc2cc1O[C@H]1CO[C@H]2[C@@H]1OC[C@@H]2OC	CHEMBL3959160	1000	nM	6	457.14	8	1	3.90382	TRUE	457.914	3.90382	8	1	4	0.596232	4	83.96	0.449182	0.653067	0.946487	0.170602	0.320716	0.150865	0.134914	0.130457	0.031926	0.777663	0.623075	0.134693	0.298361	0.972219	0.997925	0.0166189	0.0285646	0.592214	0.504079	0.0336792	0.0973133	0.0848016	0.928648	0.519103	0.756403	0.136208	0.0993221	0.276547	0.417279	0.261019	0.85408	-5.03168
CC(C)(C)c1cc(/C=C(\C#N)C(N)=S)cc(C(C)(C)C)c1O	CHEMBL539947	1000	nM	6	316.161	3	2	4.18028	TRUE	316.47	4.18028	3	2	4	0.487651	0	70.04	0.0144657	0.355441	0.432938	0.958522	0.788795	0.200857	0.75003	0.179741	0.0394028	0.835816	0.85519	0.564085	0.00523742	0.368214	0.999846	0.00139948	0.00082134	0.0603028	0.576173	0.370573	0.119728	0.170197	0.975588	0.126615	0.68415	0.0174377	0.627277	0.982569	0.216844	0.887397	0.477161	-4.82995
COc1cc2c(Nc3ccc(Br)c(Cl)c3)ncnc2cc1O[C@H]1CO[C@H]2[C@@H]1OC[C@@H]2NC(C)=O	CHEMBL3961417	1000	nM	6	548.046	8	2	3.8476	TRUE	549.809	3.8476	8	2	3	0.477993	4	103.83	0.416757	0.6298	0.897363	0.15916	0.339485	0.109511	0.156404	0.106946	0.110173	0.763953	0.686303	0.108401	0.511076	0.959511	0.996219	0.0202644	0.0327018	0.444092	0.31388	0.0351405	0.121393	0.078819	0.85868	0.634288	0.74991	0.146684	0.107092	0.247358	0.543339	0.188429	0.784188	-5.29585
CC#CC(=O)N1CCC[C@H]1n1nc(-c2ccc(C(=O)Nc3ccccn3)cc2)c2c(N)ncnc21	CHEMBL5187554	1000	nM	6	466.187	8	2	2.8671	TRUE	466.505	2.8671	8	2	4	0.442077	1	131.92	0.340791	0.514372	0.850185	0.0490953	0.300215	0.333064	0.43313	0.0913014	0.0404492	0.561203	0.623301	0.294744	0.692072	0.976545	0.98861	0.012715	0.0229577	0.180934	0.152215	0.0246441	0.116539	0.0351124	0.854511	0.492821	0.545055	0.129724	0.0290067	0.283402	0.243655	0.193127	0.801127	-5.31536
COc1cc2c(Nc3ccc(Br)c(Cl)c3)ncnc2cc1O[C@H]1CO[C@H]2[C@@H]1OC[C@@H]2N1CCN(C)CC1	CHEMBL3972940	1000	nM	6	589.109	9	1	3.9589	TRUE	590.906	3.9589	9	1	3	0.458898	4	81.21	0.346649	0.727787	0.791927	0.122925	0.156997	0.163868	0.0355701	0.329158	0.25974	0.801738	0.671079	0.129169	0.653945	0.901105	0.986555	0.0130857	0.0277695	0.353733	0.172737	0.037758	0.0788232	0.0247299	0.876286	0.685729	0.574932	0.0487773	0.0796368	0.174929	0.298817	0.307602	0.943205	-5.06489
COc1cc2c(Nc3ccc(Br)c(Cl)c3)ncnc2cc1O[C@H]1CO[C@H]2[C@@H]1OC[C@@H]2N	CHEMBL3976788	1000	nM	6	506.036	8	2	3.6702	TRUE	507.772	3.6702	8	2	3	0.539497	4	100.75	0.529508	0.628902	0.946865	0.453109	0.337754	0.0930153	0.123908	0.177916	0.124642	0.642851	0.760494	0.0923793	0.484133	0.934406	0.998805	0.0424843	0.0565519	0.725493	0.626025	0.0825634	0.170523	0.113767	0.843091	0.501845	0.723125	0.333493	0.148643	0.394064	0.596577	0.224655	0.848567	-5.27612
CC#CC(=O)N1CCC[C@H]1c1nc(-c2ccc(C(=O)Nc3ccccn3)cc2)c2c(N)nccn12	CHEMBL3707348	1000	nM	6	465.191	7	2	3.3126	TRUE	465.517	3.3126	7	2	4	0.446551	1	118.51	0.45254	0.430356	0.79844	0.0488988	0.41952	0.288245	0.57943	0.0850632	0.104747	0.688936	0.711746	0.286737	0.715902	0.962114	0.989942	0.0101669	0.0208882	0.345207	0.167324	0.0238838	0.102614	0.025803	0.885884	0.618324	0.590327	0.0898631	0.0577351	0.220148	0.219195	0.216983	0.883993	-5.20657
COc1cc2c(Nc3ccc(Br)c(Cl)c3)ncnc2cc1O[C@H]1CO[C@H]2[C@@H]1OC[C@@H]2N1CCCC1	CHEMBL3923645	1000	nM	6	560.083	8	1	4.8073	TRUE	561.864	4.8073	8	1	3	0.459653	4	77.97	0.371826	0.696773	0.853455	0.238211	0.267526	0.0905218	0.089179	0.253196	0.321049	0.794351	0.694159	0.12401	0.537345	0.867903	0.996254	0.0257863	0.0353345	0.59088	0.392035	0.0565665	0.134476	0.0564287	0.879403	0.812593	0.723999	0.123415	0.204498	0.363325	0.44449	0.269875	0.924381	-5.09088
COc1cc2c(Nc3ccc(Cl)c(Cl)c3F)ncnc2cc1OC[C@@H]1CN2CCC[C@@H]2C(=O)N1	CHEMBL3945072	1000	nM	6	505.108	7	2	4.1695	TRUE	506.365	4.1695	7	2	3	0.485584	2	88.61	0.292878	0.628726	0.882539	0.122133	0.341982	0.261258	0.428492	0.201739	0.0935274	0.844635	0.926502	0.153946	0.642817	0.973399	0.99878	0.0198612	0.0270562	0.527304	0.293468	0.0441894	0.0824695	0.119307	0.893994	0.796249	0.773299	0.154731	0.063192	0.388119	0.547688	0.134673	0.905989	-4.91845
COc1cc2ncnc(NCc3ccc(F)c(Cl)c3)c2cc1OCCCCCCC(=O)NO	CHEMBL3967530	1000	nM	6	476.163	7	3	4.8777	TRUE	476.936	4.8777	7	3	4	0.194227	0	105.6	0.779068	0.729737	0.898997	0.439861	0.914481	0.240352	0.703707	0.228513	0.498057	0.883631	0.98624	0.239561	0.577045	0.902372	0.999686	0.00592247	0.0110436	0.724117	0.336304	0.0403032	0.0889277	0.0475144	0.919184	0.939156	0.792139	0.0678912	0.0668711	0.39389	0.392556	0.193112	0.927532	-5.34208
C[C@@H](Nc1ncnc2[nH]c(-c3ccc(CNCC(=O)NO)cc3)cc12)c1ccccc1	CHEMBL3910297	1000	nM	6	416.196	6	5	3.393	TRUE	416.485	3.393	6	5	4	0.222161	1	114.96	0.872329	0.652035	0.895484	0.636476	0.586645	0.360344	0.40159	0.35606	0.34703	0.560467	0.783952	0.464165	0.781151	0.869088	0.997199	0.0161825	0.0158501	0.557596	0.14716	0.048042	0.137732	0.0183366	0.735242	0.490196	0.342132	0.139233	0.0530864	0.294687	0.205687	0.356796	0.889332	-5.90489
COc1cc2c(Nc3ccc(Cl)c(Cl)c3F)ncnc2cc1OC[C@@H]1CN2CCCC[C@H]2C(=O)N1	CHEMBL3940489	1000	nM	6	519.124	7	2	4.5596	TRUE	520.392	4.5596	7	2	3	0.461094	2	88.61	0.256734	0.759301	0.859639	0.0994063	0.464807	0.197851	0.51553	0.245433	0.109664	0.857444	0.870095	0.150098	0.70106	0.957017	0.998832	0.014774	0.0224783	0.578566	0.297592	0.047857	0.0999439	0.0890456	0.910573	0.855323	0.793543	0.162098	0.0825309	0.407298	0.468269	0.144144	0.906776	-4.95708
COc1cc2c(Nc3ccc(Cl)c(Cl)c3F)ncnc2cc1OC[C@@H]1CN2CCCC[C@@H]2C(=O)N1	CHEMBL3900059	1000	nM	6	519.124	7	2	4.5596	TRUE	520.392	4.5596	7	2	3	0.461094	2	88.61	0.242783	0.735168	0.842636	0.108793	0.487104	0.193549	0.556224	0.226995	0.124035	0.856895	0.888539	0.138869	0.686447	0.954612	0.99878	0.0159029	0.022519	0.602069	0.336995	0.0527536	0.10221	0.103226	0.910115	0.859536	0.807588	0.178124	0.0947921	0.452489	0.513294	0.152716	0.915264	-4.95527
COc1cc2c(Nc3ccc(Br)c(Cl)c3F)ncnc2cc1OC[C@@H]1CN2CCC[C@H]2C(=O)N1	CHEMBL3986135	1000	nM	6	549.058	7	2	4.2786	TRUE	550.816	4.2786	7	2	3	0.443094	2	88.61	0.298367	0.682361	0.903783	0.11665	0.323551	0.255062	0.383974	0.223398	0.0921745	0.857678	0.906986	0.18054	0.671555	0.97249	0.998953	0.0179373	0.0275586	0.507052	0.218474	0.0311537	0.0750069	0.090465	0.905701	0.790555	0.749514	0.133059	0.0565292	0.338511	0.498319	0.113109	0.901476	-4.95279
O=C(CCCCCCOc1ccc(-c2cc3c(NCc4ccccc4)ncnc3[nH]2)cc1)NO	CHEMBL3985004	1000	nM	6	459.227	6	4	5.0717	TRUE	459.55	5.0717	6	4	3	0.13365	0	112.16	0.885083	0.525219	0.803209	0.643725	0.904015	0.253548	0.686275	0.300533	0.625098	0.824697	0.851607	0.353601	0.689603	0.882242	0.996539	0.0083504	0.0209734	0.773451	0.365134	0.0755769	0.170834	0.0395933	0.778207	0.91796	0.720127	0.293983	0.135985	0.621511	0.606501	0.341812	0.96404	-5.77905
COc1cc2c(Nc3ccc(Cl)c(Cl)c3F)ncnc2cc1OC[C@@H]1CN2CCC[C@H]2C(=O)N1C	CHEMBL3983466	1000	nM	6	519.124	7	1	4.5117	TRUE	520.392	4.5117	7	1	3	0.479452	2	79.82	0.309362	0.695416	0.890046	0.0814198	0.347779	0.337015	0.298925	0.211517	0.0574682	0.890157	0.95286	0.156157	0.628565	0.976542	0.999436	0.0124465	0.0269845	0.461854	0.236283	0.0245081	0.0531647	0.0659128	0.955474	0.869709	0.749199	0.0693172	0.0309756	0.273837	0.300718	0.107291	0.894324	-4.74489
COc1cc2c(Nc3cc(Cl)c(Br)cc3F)ncnc2cc1O[C@@H]1C[C@H]2OC[C@H](OC)[C@H]2O1	CHEMBL3946590	1000	nM	6	539.026	8	1	4.8446	TRUE	540.773	4.8446	8	1	3	0.4447	4	83.96	0.510418	0.733143	0.953632	0.170873	0.344944	0.11225	0.299251	0.092569	0.0287821	0.744663	0.753616	0.136016	0.38864	0.984975	0.9992	0.0171567	0.0261718	0.686865	0.630445	0.0343099	0.0686553	0.133168	0.935886	0.724313	0.847018	0.152058	0.107501	0.492098	0.538899	0.175257	0.858626	-4.92384
COc1cc2c(Nc3ccc(F)c(Cl)c3F)ncnc2cc1O[C@@H]1C[C@H]2OC[C@H](OC)[C@H]2O1	CHEMBL3955486	1000	nM	6	479.106	8	1	4.2212	TRUE	479.867	4.2212	8	1	4	0.526057	4	83.96	0.521635	0.688627	0.95111	0.125773	0.265626	0.100656	0.24929	0.0666215	0.0193206	0.67842	0.691816	0.120725	0.345383	0.987401	0.998973	0.0255785	0.0314997	0.585249	0.687669	0.0422463	0.0761258	0.143991	0.911094	0.527303	0.760881	0.178937	0.067948	0.438466	0.510669	0.169301	0.821753	-4.92322
COc1cc2c(Nc3cc(Cl)c(Cl)cc3F)ncnc2cc1O[C@@H]1C[C@H]2OC[C@H](OC)[C@H]2O1	CHEMBL3924380	1000	nM	6	495.076	8	1	4.7355	TRUE	496.322	4.7355	8	1	4	0.490664	4	83.96	0.528482	0.678592	0.955783	0.159732	0.306029	0.124912	0.292797	0.0866975	0.0200932	0.725892	0.726469	0.14555	0.369616	0.987012	0.99894	0.0177929	0.0246111	0.659016	0.659869	0.0403956	0.072112	0.153134	0.928555	0.686299	0.846419	0.183997	0.103259	0.528076	0.560919	0.199504	0.858043	-4.87
COc1cc2c(Nc3ccc(Br)c(Cl)c3Cl)ncnc2cc1OC[C@@H]1CN2CCOC[C@H]2CO1	CHEMBL3905501	1000	nM	6	568.028	8	1	4.9297	TRUE	570.271	4.9297	8	1	3	0.418713	2	77.97	0.680448	0.778195	0.928722	0.338495	0.322236	0.0820458	0.19146	0.23596	0.135096	0.723936	0.833829	0.189061	0.55015	0.949943	0.99874	0.0216654	0.0258186	0.780921	0.607658	0.0439709	0.0808615	0.0869261	0.892405	0.822345	0.81043	0.186621	0.255636	0.540872	0.575842	0.359234	0.926597	-4.84259
Cc1cccc2[nH]c(-c3n[nH]c4ncc(-c5cncc6ccccc56)cc34)nc12	CHEMBL400858	1000	nM	6	376.144	4	2	5.02482	TRUE	376.423	5.02482	4	2	3	0.444161	0	83.14	0.616498	0.581614	0.837886	0.971846	0.765617	0.327426	0.645952	0.301736	0.488947	0.572214	0.962736	0.115842	0.387775	0.946232	0.999943	0.0788717	0.0224413	0.917101	0.674453	0.160145	0.203883	0.235263	0.931666	0.908873	0.828943	0.361451	0.3851	0.743872	0.706582	0.431278	0.962493	-5.61592
CN[C@H]1CO[C@H]2[C@@H]1OC[C@@H]2Oc1cc2ncnc(Nc3ccc(Br)c(Cl)c3)c2cc1OC	CHEMBL3974328	1000	nM	6	520.051	8	2	3.9309	TRUE	521.799	3.9309	8	2	3	0.504639	4	86.76	0.461527	0.593115	0.926076	0.322022	0.328719	0.123439	0.0821072	0.201395	0.151452	0.722428	0.755697	0.121369	0.504943	0.958024	0.99793	0.0183925	0.0292848	0.620727	0.40374	0.0352894	0.101262	0.0895404	0.888339	0.575933	0.678154	0.14118	0.125734	0.280136	0.446512	0.258772	0.847869	-5.1875
COc1cc2c(Nc3ccc(Br)c(Cl)c3)ncnc2cc1O[C@H]1CO[C@H]2[C@@H]1OC[C@@H]2OC(C)=O	CHEMBL3933359	1000	nM	6	549.03	9	1	4.2746	TRUE	550.793	4.2746	9	1	3	0.450855	4	101.03	0.399672	0.731809	0.870455	0.337444	0.463418	0.099999	0.24066	0.105073	0.167353	0.620578	0.674087	0.0863084	0.595367	0.95721	0.995232	0.0312565	0.052735	0.441287	0.289496	0.0326325	0.0994319	0.124739	0.880538	0.65639	0.703384	0.15192	0.135894	0.314815	0.517787	0.25474	0.827958	-4.92608
Clc1ccc(C2=NN(c3ccccc3)C(c3ccc4ccccc4c3)C2)cc1Cl	CHEMBL2325101	1020	nM	5.9914	416.085	2	0	7.5023	TRUE	417.339	7.5023	2	0	3	0.336956	1	15.6	0.130672	0.892912	0.810626	0.59009	0.79287	0.345238	0.569388	0.0744951	0.0644289	0.588074	0.0964032	0.643624	0.0204175	0.880408	0.999899	0.00823797	0.00807869	0.724087	0.362171	0.0610991	0.212311	0.178057	0.655738	0.882235	0.815797	0.033235	0.346468	0.848891	0.197607	0.59349	0.861171	-4.75406
Cc1ccc(C2=NN(C(N)=S)C(c3ccc4ccccc4c3)C2)cc1	CHEMBL2324873	1040	nM	5.98297	345.13	2	1	4.54292	TRUE	345.471	4.54292	2	1	4	0.693254	1	41.62	0.363279	0.863191	0.908375	0.871044	0.930948	0.498972	0.791146	0.151255	0.0883357	0.597702	0.652073	0.485111	0.0919212	0.85034	0.999962	0.0100233	0.0138664	0.722269	0.547589	0.121939	0.298596	0.361699	0.908112	0.689132	0.690993	0.291678	0.499933	0.856498	0.153907	0.645042	0.785991	-5.27728
N#Cc1cnc2ccc(NC(=O)C#CCN3CCSCC3)cc2c1Nc1cccc(Br)c1	CHEMBL327023	1040	nM	5.98297	505.057	6	2	4.60328	TRUE	506.429	4.60328	6	2	3	0.503771	0	81.05	0.448026	0.821851	0.786356	0.669483	0.718916	0.326098	0.745706	0.368971	0.30374	0.632751	0.785906	0.412847	0.692635	0.958789	0.99774	0.0395563	0.00953085	0.544133	0.343949	0.0282708	0.0712914	0.199797	0.852139	0.882388	0.770185	0.123912	0.230239	0.865986	0.694633	0.562254	0.950067	-5.22032
CC(C)(C)c1ccc(C(=O)CCCN2CCC(OC(c3ccccc3)c3ccccc3)CC2)cc1	CHEMBL305660	1057.5	nM	5.97572	469.298	3	0	7.2176	TRUE	469.669	7.2176	3	0	3	0.309941	0	29.54	0.0522543	0.851608	0.601813	0.0272822	0.125428	0.103926	0.0888232	0.415634	0.749185	0.724383	0.144714	0.111041	0.18751	0.0913613	0.997004	0.00990212	0.00237156	0.0334032	0.041409	0.0159678	0.0729706	0.00564826	0.920333	0.994962	0.468953	0.00180765	0.169127	0.119518	0.00687596	0.648122	0.965139	-5.05005
Cc1ccc(C2=NN(C3=NC(=O)CS3)C(c3ccc(Br)cc3)C2)cc1	CHEMBL1958215	1070	nM	5.97062	413.02	4	0	4.53802	TRUE	414.328	4.53802	4	0	4	0.725146	1	45.03	0.091091	0.936306	0.91393	0.72727	0.977758	0.712845	0.947328	0.0811503	0.135761	0.733982	0.539949	0.325902	0.0157564	0.854439	0.999988	0.0023265	0.00918147	0.141194	0.213508	0.0132774	0.214352	0.113037	0.957376	0.881	0.619425	0.0449385	0.108969	0.845745	0.027641	0.735956	0.802175	-5.36549
FC(F)(F)c1ccc(/C=C/c2nc(CNc3ccccc3Br)co2)cc1	CHEMBL5187503	1070	nM	5.97062	422.024	3	1	6.2384	TRUE	423.232	6.2384	3	1	3	0.528254	0	38.06	0.23251	0.916816	0.859418	0.918556	0.963995	0.312017	0.541503	0.135434	0.350722	0.621477	0.575514	0.581584	0.0791699	0.910202	0.99989	0.0141884	0.0151041	0.743767	0.5754	0.12879	0.42418	0.262284	0.926975	0.743533	0.885196	0.104463	0.433625	0.917633	0.606975	0.373912	0.807938	-5.05966
CCNCc1cncc(-c2cnc3[nH]nc(-c4nc5cc(N6CCN(C)CC6)ccc5[nH]4)c3c2)c1	CHEMBL400569	1070	nM	5.97062	467.255	7	3	3.4245	TRUE	467.581	3.4245	7	3	4	0.351674	0	101.65	0.356912	0.423648	0.692283	0.504581	0.148577	0.198631	0.119888	0.446637	0.324671	0.52351	0.650739	0.250156	0.674164	0.904677	0.979659	0.040576	0.0254128	0.562598	0.248566	0.0588596	0.0772455	0.010694	0.617484	0.484522	0.286894	0.0711386	0.062076	0.256811	0.385351	0.32646	0.961304	-5.68958
O=C(CBr)OCCn1c(=O)oc2cc3ncnc(Nc4ccc(F)c(Cl)c4)c3cc21	CHEMBL3908711	1100	nM	5.95861	493.979	8	1	4.0119	TRUE	495.692	4.0119	8	1	4	0.318613	0	99.25	0.164768	0.901228	0.687913	0.917925	0.790832	0.168203	0.640144	0.120503	0.286502	0.434993	0.928046	0.0989017	0.234967	0.980858	0.999365	0.0597367	0.028705	0.609779	0.326703	0.0358294	0.111339	0.341175	0.906254	0.76953	0.714108	0.194762	0.238332	0.473114	0.408583	0.279384	0.755438	-4.94559
CNC(=O)CN1CC(Oc2cc3c(Nc4cccc(Cl)c4F)ncnc3cc2OC)C1	CHEMBL2408211	1100	nM	5.95861	445.132	7	2	2.9835	TRUE	445.882	2.9835	7	2	4	0.577578	0	88.61	0.253978	0.8076	0.89327	0.413768	0.474196	0.281856	0.149814	0.253569	0.171691	0.757368	0.943205	0.0921865	0.581328	0.960112	0.999823	0.00991912	0.00673769	0.499938	0.0752496	0.0136802	0.0409642	0.0252601	0.950411	0.423999	0.442538	0.0387687	0.0202675	0.0420542	0.114837	0.126866	0.793809	-4.89973
COc1ccc(Nc2ncnc3cccc(OC4CCN(C)CC4)c23)cc1Cl	CHEMBL197525	1100	nM	5.95861	398.151	6	1	4.5084	TRUE	398.894	4.5084	6	1	4	0.68199	0	59.51	0.482942	0.955758	0.932537	0.525782	0.180178	0.139893	0.0263905	0.65671	0.558838	0.77258	0.223965	0.159149	0.748869	0.790356	0.999198	0.00933722	0.0177192	0.56182	0.176818	0.0160051	0.0787476	0.0135865	0.953356	0.5653	0.451136	0.0516944	0.0676014	0.104254	0.157896	0.242466	0.927627	-4.73682
CNC(=O)c1cc(Nc2ccc(-c3nc4ccccc4s3)cc2)ccn1	CHEMBL464210	1100	nM	5.95861	360.104	5	2	4.4615	TRUE	360.442	4.4615	5	2	4	0.56373	0	66.91	0.771508	0.771311	0.924163	0.855037	0.526424	0.539518	0.311498	0.295285	0.0979557	0.573855	0.601104	0.467264	0.186449	0.971914	0.999154	0.0541438	0.0789691	0.951094	0.322103	0.0611579	0.431704	0.17573	0.910662	0.492202	0.808478	0.455809	0.311167	0.890402	0.594038	0.486852	0.658081	-5.05522
C#Cc1cccc(Nc2ncnc3cc4c(cc23)N(C(=O)/C=C/CN2CCN(C)CC2)CCO4)c1	CHEMBL3114689	1110	nM	5.95468	468.227	7	1	2.8837	TRUE	468.561	2.8837	7	1	4	0.45598	0	73.83	0.681564	0.694926	0.70127	0.204142	0.146781	0.497256	0.127771	0.39998	0.352758	0.626844	0.83446	0.407248	0.846547	0.950775	0.969193	0.0401926	0.0503652	0.218464	0.0462319	0.0459558	0.107507	0.0319652	0.75412	0.640371	0.535908	0.0547461	0.0343211	0.11227	0.241536	0.303377	0.9125	-4.84467
COc1ccc(-c2ccc3c(ccn3Cc3coc(/C=C/c4ccc(C(F)(F)F)cc4)n3)c2)cc1	CHEMBL5174917	1110	nM	5.95468	474.156	4	0	7.5424	TRUE	474.482	7.5424	4	0	3	0.255212	0	40.19	0.349312	0.514604	0.850563	0.398314	0.682461	0.246693	0.323386	0.0917086	0.0656209	0.706207	0.449972	0.477164	0.0806402	0.955378	0.999577	0.0172598	0.0159141	0.662818	0.44211	0.115045	0.293287	0.146272	0.783893	0.985508	0.923011	0.0752882	0.273313	0.739131	0.436189	0.180632	0.922326	-4.8683
Cc1ccc(C2=NN(c3ccccc3)C(c3ccc4ccccc4c3)C2)cc1	CHEMBL2325100	1130	nM	5.94692	362.178	2	0	6.50392	TRUE	362.476	6.50392	2	0	3	0.405808	1	15.6	0.264287	0.932012	0.895214	0.396013	0.747673	0.522803	0.497973	0.138923	0.0487317	0.616997	0.172608	0.59038	0.0510874	0.870385	0.999882	0.0057389	0.0111752	0.67744	0.248362	0.0595541	0.189178	0.0962895	0.722495	0.909295	0.685004	0.0924981	0.199784	0.785757	0.11632	0.532284	0.932638	-4.93953
Clc1cccc(Nc2ccnc3[nH]c4ccc(Br)cc4c23)c1	CHEMBL3133814	1150	nM	5.9393	370.982	2	2	5.8756	TRUE	372.653	5.8756	2	2	3	0.461392	0	40.71	0.607856	0.887202	0.881997	0.99782	0.877769	0.15632	0.452801	0.300471	0.838595	0.510402	0.828439	0.184052	0.0980256	0.974393	0.999992	0.0992477	0.0202146	0.965181	0.502986	0.0750693	0.211378	0.135642	0.938773	0.58013	0.868181	0.192278	0.535329	0.892316	0.765367	0.566254	0.70968	-4.90619
CC(=O)c1ccc2[nH]c3nccc(Nc4cccc(Cl)c4)c3c2c1	CHEMBL3133819	1150	nM	5.9393	335.083	3	2	5.3157	TRUE	335.794	5.3157	3	2	3	0.498313	0	57.78	0.600076	0.853348	0.922619	0.996989	0.803036	0.168574	0.370493	0.343296	0.743963	0.45028	0.793308	0.143077	0.106199	0.972817	0.999992	0.21136	0.0217713	0.978333	0.488793	0.102079	0.255665	0.139411	0.964724	0.761952	0.908662	0.424552	0.390713	0.905773	0.795937	0.383331	0.588136	-5.08158
CCN(CC)C/C=C/C(=O)Nc1ccc2ncnc(Nc3cccc(Br)c3)c2c1	CHEMBL91925	1164	nM	5.93405	453.116	5	2	4.9724	TRUE	454.372	4.9724	5	2	4	0.47055	0	70.15	0.761889	0.957232	0.827842	0.837909	0.582972	0.21799	0.135973	0.420782	0.892219	0.621963	0.667059	0.477771	0.801818	0.850184	0.993687	0.0888948	0.028388	0.577691	0.189301	0.0376984	0.11357	0.0361246	0.892488	0.88814	0.495068	0.147319	0.147383	0.264226	0.328653	0.431371	0.913776	-5.22901
CCCc1c(C(=O)OCC)cn2ncnc(Nc3ccc4c(cnn4Cc4ccccc4)c3)c12	CHEMBL438805	1200	nM	5.92082	454.212	8	1	5.0001	TRUE	454.534	5.0001	8	1	3	0.332163	0	86.34	0.120236	0.688297	0.810902	0.588385	0.954003	0.288546	0.948252	0.0847497	0.288365	0.630979	0.911846	0.228122	0.217383	0.940985	0.999643	0.0140635	0.029463	0.337784	0.247158	0.0213713	0.0920797	0.109117	0.931165	0.967951	0.598126	0.0787738	0.093347	0.591713	0.158345	0.195529	0.884218	-5.42983
Fc1ccc(Nc2ncnc3ccc(-c4cnn(C5CCNCC5)c4)cc23)cc1Cl	CHEMBL3828092	1202	nM	5.9201	422.142	6	2	4.9539	TRUE	422.895	4.9539	6	2	4	0.486519	0	67.66	0.390102	0.739295	0.911779	0.672655	0.491258	0.208044	0.312449	0.381526	0.241556	0.607513	0.812463	0.377836	0.814418	0.94802	0.999471	0.0300839	0.0237451	0.706305	0.605444	0.0681888	0.127386	0.0993082	0.891601	0.691352	0.790769	0.160722	0.120315	0.385265	0.368818	0.240036	0.911806	-5.24347
C=C(CN(C)C)C(=O)Nc1cc2c(Nc3ccc(F)c(Cl)c3)c(C#N)cnc2cc1OCC	CHEMBL117326	1210	nM	5.91721	467.152	6	2	5.09758	TRUE	467.932	5.09758	6	2	3	0.447923	0	90.28	0.492631	0.550192	0.839658	0.290215	0.598444	0.304287	0.557153	0.249084	0.208418	0.772318	0.773963	0.52075	0.438097	0.93789	0.995884	0.0171298	0.0105085	0.586075	0.393151	0.0266016	0.0320223	0.0923875	0.856434	0.897418	0.49787	0.0430382	0.15943	0.844514	0.544354	0.298401	0.921498	-4.92878
NC(=S)N1N=C(c2ccc(Br)cc2)CC1c1ccc2ccccc2c1	CHEMBL2324871	1210	nM	5.91721	409.025	2	1	4.997	TRUE	410.34	4.997	2	1	4	0.605114	1	41.62	0.26284	0.841587	0.864348	0.906593	0.897352	0.384718	0.76668	0.131083	0.147483	0.502853	0.409471	0.500169	0.0717676	0.847687	0.999936	0.0147269	0.0139862	0.702093	0.526212	0.103231	0.281416	0.367426	0.860652	0.709459	0.719327	0.16995	0.508957	0.85981	0.178508	0.666295	0.78286	-5.26741
COCC1CCCN1CC#CC(=O)Nc1ccc2ncc(C#N)c(Nc3cccc(Br)c3)c2c1	CHEMBL157128	1220	nM	5.91364	517.111	6	2	4.66528	TRUE	518.415	4.66528	6	2	3	0.461583	1	90.28	0.514372	0.817018	0.777783	0.339185	0.666425	0.190592	0.708875	0.356863	0.316726	0.79558	0.868791	0.333894	0.826099	0.923788	0.998385	0.025821	0.00947872	0.615622	0.225511	0.0230845	0.0488501	0.0707297	0.908581	0.929272	0.682193	0.101822	0.183406	0.739243	0.633787	0.381728	0.970109	-5.08593
Oc1ccc(CN(Cc2cc(Cl)cc(Cl)c2O)C(=S)Nc2ccccc2)cc1	CHEMBL591288	1230	nM	5.91009	432.047	3	3	5.8038	TRUE	433.36	5.8038	3	3	3	0.444049	0	55.73	0.0643896	0.312235	0.496209	0.922491	0.980298	0.404846	0.963569	0.197791	0.797869	0.665633	0.764826	0.426947	0.00801137	0.561358	0.999733	0.00466621	0.00316686	0.143428	0.501127	0.187366	0.332567	0.428845	0.788528	0.723497	0.704983	0.00525951	0.873183	0.978802	0.526672	0.789019	0.901223	-5.2769
[truncated: 446 more rows]
[truncated: 58 more columns]
