# Supplementary material for: AI-Driven Drug Discovery for Breast Cancer Based on ERBB2 Identified Through Network Pharmacology and GEO Data Analysis
Source: Research Square preprint supplement (doi:10.21203/rs.3.rs-6047847/v1), 2025-02-26
Supplement: Supplementary file 6 [file 911a9b97360b30043f3d7d27.xlsx]

## Sheet: 1349compounds
S8. Compounds matching RO5
molecule_chembl_id	IC50	units	smiles	pIC50	molecular weight	n_hba	n_hbd	logp	ro5_fulfilled
CHEMBL941	0.06	nM	Cc1ccc(NC(=O)c2ccc(CN3CCN(C)CC3)cc2)cc1Nc1nccc(-c2cccnc2)n1	10.2218	493.259	7	2	4.59032	TRUE
CHEMBL5221067	0.14	nM	N#Cc1c(NC(=O)CNc2n[nH]c3ncccc23)sc2c1CCCC2	9.85387	352.111	6	3	2.82048	TRUE
CHEMBL437890	0.5	nM	CN1CCN(CCC#CC(=O)Nc2cc3c(Nc4ccc(F)c(Br)c4)ncnc3cn2)CC1	9.30103		7	2	3.2494	TRUE
CHEMBL203599	0.7	nM	CN1CCN(CCC#CC(=O)Nc2cc3c(Nc4ccc(F)c(Cl)c4)ncnc3cn2)CC1	9.1549	467.164	7	2	3.1403	TRUE
CHEMBL204638	0.7	nM	O=C(C#CCCN1CCOCC1)Nc1cc2c(Nc3ccc(F)c(Br)c3)ncnc2cn1	9.1549	498.082	7	2	3.3342	TRUE
CHEMBL203661	0.8	nM	O=C(C#CCCN1CCOCC1)Nc1cc2c(Nc3ccc(F)c(Cl)c3)ncnc2cn1	9.09691	454.132	7	2	3.2251	TRUE
CHEMBL258282	1	nM	CN1CCN(CCOc2n[nH]c3ncnc(Nc4ccc(OCc5ccccn5)c(Cl)c4)c23)CC1	9	494.195	9	2	3.3501	TRUE
CHEMBL4067871	1	nM	OC[C@H](Nc1cnc(-c2cc(Cl)ccc2O)c(-c2ccc3cnccc3c2)c1)c1ccccc1	9	467.14	5	3	6.4683	TRUE
CHEMBL4105329	1	nM	Cc1n[nH]c2ccc(-c3cc(N[C@@H](CO)c4ccccc4)cnc3-c3cc(Cl)ccc3O)cc12	9	470.151	5	4	6.10482	TRUE
CHEMBL4075917	1	nM	Cc1n[nH]c2ccc(-c3cc(N[C@@H](CO)c4ccccc4)cnc3-c3ccc(F)cc3O)cc12	9	454.181	5	4	5.59052	TRUE
CHEMBL483332	1	nM	C[C@H](CN(C)C)Oc1cccc2ncnc(Nc3ccc(OCc4cnccn4)c(Cl)c3)c12	9	464.173	8	1	4.7247	TRUE
CHEMBL5176920	1.06	nM	Cc1cc(Nc2ncnc3cc(O)c(NC(=O)/C=C/[C@H]4CCCN4C)cc23)ccc1Oc1cc2nccn2cn1	8.97469	536.228	10	3	4.81132	TRUE
CHEMBL203644	1.1	nM	CC#CC(=O)Nc1cc2c(Nc3ccc(F)c(Cl)c3)ncnc2cn1	8.95861	355.064	5	2	3.5227	TRUE
CHEMBL54091	1.1	nM	C=CC(=O)Nc1cc2c(Nc3ccc(F)c(Br)c3)ncnc2cn1	8.95861	387.013	5	2	3.7945	TRUE
CHEMBL2048789	1.3	nM	O=C1NCc2ccc(Oc3ccc(Nc4ncnc5ccn(CCO)c45)cc3Cl)cc21	8.88606	435.11	7	3	3.8563	TRUE
CHEMBL5179954	1.4	nM	Cc1cc(Nc2ncnc3ccc(NC(=O)/C=C/[C@H]4CCCN4C)cc23)ccc1Oc1cc2nncn2cn1	8.85387	521.229	10	2	4.50072	TRUE
CHEMBL5288888	1.42	nM	C=CC(=O)N1CCC(Oc2cc3c(Nc4cccc(Cl)c4F)ncnc3cc2O[C@H]2CCOC2)CC1	8.84771	512.163	7	1	4.8894	TRUE
CHEMBL5193451	1.43	nM	Cc1cc(Nc2ncnc3cc(O)c(NC(=O)/C=C/[C@H]4CCCN4C)cc23)ccc1Oc1ccn2ncnc2c1	8.84466	536.228	10	3	4.81132	TRUE
CHEMBL2048795	1.5	nM	O=C1Cc2cccc(Oc3ccc(Nc4ncnc5ccn(CCO)c45)cc3Cl)c2N1	8.82391	435.11	7	3	4.1075	TRUE
CHEMBL2048906	1.6	nM	CC(=O)NCCn1ccc2ncnc(Nc3ccc(Oc4cccc5sncc45)c(Cl)c3)c21	8.79588	478.098	8	2	5.3664	TRUE
CHEMBL2048796	1.6	nM	O=C1Cc2c(cccc2Oc2ccc(Nc3ncnc4ccn(CCO)c34)cc2Cl)N1	8.79588	435.11	7	3	4.1075	TRUE
CHEMBL2048903	1.7	nM	OCCn1ccc2ncnc(Nc3ccc(Oc4cccc5[nH]ncc45)c(Cl)c3)c21	8.76955	420.11	7	3	4.4892	TRUE
CHEMBL202360	1.9	nM	C#CC(=O)Nc1ccc2ncnc(Nc3cccc(Br)c3)c2c1	8.72125	366.012	4	2	3.7076	TRUE
CHEMBL5175489	1.93	nM	C=CC(=O)Nc1cc2c(Nc3ccc(Oc4cc5nncn5cn4)c(C)c3)ncnc2cc1OCC	8.71444	482.181	10	2	4.43502	TRUE
CHEMBL1173655	2	nM	CN(C)C/C=C/C(=O)Nc1cc2c(Nc3ccc(F)c(Cl)c3)ncnc2cc1O[C@H]1CCOC1	8.69897	485.163	7	2	4.3899	TRUE
CHEMBL2103842	2	nM	C[C@@H]1COC(Nc2ccc3ncnc(Nc4ccc(OCc5nccs5)c(Cl)c4)c3c2)=N1	8.69897	466.098	9	2	5.2489	TRUE
CHEMBL402553	2	nM	Clc1cc(Nc2ncnc3[nH]nc(OCCN4CCCC4)c23)ccc1OCc1ccccn1	8.69897	465.168	8	2	4.1985	TRUE
CHEMBL3968417	2	nM	CN(C)C/C=C/C(=O)Nc1cc2c(Nc3ccc(F)c(Cl)c3)ncnc2cn1	8.69897	400.121	6	2	3.6172	TRUE
CHEMBL497459	2	nM	CN(C)/N=C/c1c(N)ncnc1Nc1ccc2c(cnn2Cc2cccc(F)c2)c1	8.69897	404.187	8	2	3.235	TRUE
CHEMBL403569	2	nM	O=C(CO)N1CCC[C@H]1COc1cccc2ncnc(Nc3ccc(OCc4ccccn4)c(Cl)c3)c12	8.69897	519.167	8	2	4.3629	TRUE
CHEMBL518750	2	nM	CC(C)(Oc1cccc2ncnc(Nc3ccc(OCc4ccccn4)c(Cl)c3)c12)C(N)=O	8.69897	463.141	7	2	4.6435	TRUE
CHEMBL4522240	2.1	nM	COc1cc2ncnc(Nc3ccc(OCc4cccc(F)c4)c(Cl)c3)c2cc1OCCCN1CCNCCNCCNCC1	8.67778	637.294	10	4	4.6068	TRUE
CHEMBL2048905	2.1	nM	OCCn1ccc2ncnc(Nc3ccc(Oc4cccc5sncc45)c(Cl)c3)c21	8.67778	437.071	8	2	5.2226	TRUE
CHEMBL202411	2.1	nM	O=C(C#CCO)Nc1ccc2ncnc(Nc3ccc(F)c(Cl)c3)c2c1	8.67778	370.063	5	3	3.1001	TRUE
CHEMBL205059	2.1	nM	O=C(C#CCCN1CCCCC1)Nc1cc2c(Nc3ccc(F)c(Cl)c3)ncnc2cn1	8.67778	452.153	6	2	4.3788	TRUE
CHEMBL1923009	2.1	nM	OCCOCCn1ccc2ncnc(Nc3ccc(Oc4cccc(Cl)c4)c(Cl)c3)c21	8.67778	458.091	7	2	5.2829	TRUE
CHEMBL2048904	2.1	nM	Cn1ncc2c(Oc3ccc(Nc4ncnc5ccn(CCO)c45)cc3Cl)cccc21	8.67778	434.126	8	2	4.4996	TRUE
CHEMBL204085	2.3	nM	O=C(C#CCCN1CCOCC1)Nc1ccc2ncnc(Nc3ccc(F)c(Cl)c3)c2c1	8.63827	453.137	6	2	3.8301	TRUE
CHEMBL2048788	2.3	nM	CC(C)(C)NC(=O)c1cccc(Oc2ccc(Nc3ncnc4ccn(CCO)c34)cc2Cl)c1	8.63827	479.172	7	3	5.1412	TRUE
CHEMBL378144	2.4	nM	C#CC(=O)Nc1cc2c(Nc3cccc(Br)c3)ncnc2cn1	8.61979	367.007	5	2	3.1026	TRUE
CHEMBL5190132	2.41	nM	Cc1cc(Nc2ncnc3cc(O)c(NC(=O)/C=C/[C@H]4CCCN4C)cc23)ccc1Oc1cnc2ccnn2c1	8.61798	536.228	10	3	4.81132	TRUE
CHEMBL2048794	2.5	nM	O=C1NCc2cccc(Oc3ccc(Nc4ncnc5ccn(CCO)c45)cc3Cl)c21	8.60206	435.11	7	3	3.8563	TRUE
CHEMBL2048797	2.5	nM	OCCn1ccc2ncnc(Nc3ccc(Oc4cccc5[nH]ccc45)c(Cl)c3)c21	8.60206	419.115	6	3	5.0942	TRUE
CHEMBL5203179	2.55	nM	COCC(=O)NC/C=C/c1ccc2ncnc(Nc3ccc(Oc4cc5nncn5cn4)c(C)c3)c2c1	8.59346	496.197	10	2	3.68762	TRUE
CHEMBL382073	2.6	nM	CCN(CC)CCC#CC(=O)Nc1ccc2ncnc(Nc3ccc(F)c(Cl)c3)c2c1	8.58503	439.158	5	2	4.8397	TRUE
CHEMBL380669	2.8	nM	CC(C)N(CC#CC(=O)Nc1ccc2ncnc(Nc3ccc(F)c(Cl)c3)c2c1)C(C)C	8.55284	453.173	5	2	5.2266	TRUE
CHEMBL1923022	2.8	nM	CS(=O)(=O)O.O=C(CCO)NCCn1ccc2ncnc(Nc3ccc(Oc4cccc(C(F)(F)F)c4)c(Cl)c3)c21	8.55284	615.117	9	4	4.642	TRUE
CHEMBL5175873	2.85	nM	Cc1cc(Nc2ncnc3ccc(NC(=O)/C=C/CN(C)C)cc23)ccc1Oc1cc2nncn2cn1	8.54516	495.213	10	2	3.96812	TRUE
CHEMBL2148050	2.9	nM	CS(=O)(=O)CC(=O)NCCn1ccc2ncnc(Nc3ccc(Oc4cccc(Cl)c4)c(Cl)c3)c21	8.5376	533.069	8	2	4.4348	TRUE
CHEMBL2408045	3	nM	CNC(=O)CN1CCC(Oc2cc3c(Nc4cccc(Cl)c4F)ncnc3cc2OC)CC1	8.52288	473.163	7	2	3.7637	TRUE
CHEMBL255135	3	nM	CNCCOc1n[nH]c2ncnc(Nc3ccc(OCc4ccccn4)c(Cl)c3)c12	8.52288	425.137	8	3	3.3221	TRUE
CHEMBL53555	3	nM	C=CC(=O)Nc1cc2c(Nc3ccc(F)c(Cl)c3)ncnc2cn1	8.52288	343.064	5	2	3.6854	TRUE
CHEMBL257430	3	nM	Clc1cc(Nc2ncnc3[nH]nc(OCCN4CCNCC4)c23)ccc1OCc1ccccn1	8.52288	480.179	9	3	3.0079	TRUE
CHEMBL402339	3	nM	COc1cc(Nc2ncnc3[nH]nc(OCCN4CCC(O)CC4)c23)ccc1OCc1cccc(F)c1	8.52288	508.223	9	3	3.6587	TRUE
CHEMBL1923003	3.3	nM	Cn1ccc2ncnc(Nc3ccc(Oc4cccc(Cl)c4)c(Cl)c3)c21	8.48149	384.054	5	1	5.811	TRUE
CHEMBL5182567	3.5	nM	C=CC(=O)Nc1ccc2ncnc(Nc3ccc4[nH]cc(Br)c4c3)c2c1	8.45593	407.038	4	3	4.7417	TRUE
CHEMBL4755170	3.5	nM	C=CC(=O)Nc1cccc(-c2c[nH]c3ncnc(Nc4ccc5[nH]c(Cc6ccccc6)nc5c4)c23)c1	8.45593	485.196	5	4	5.9601	TRUE
CHEMBL572091	3.8	nM	CN1C[C@@H](OC(=O)N2CC=CC2)C[C@H](C(=O)NO)[C@H]1C(=O)N1CCN(c2ccccc2)CC1	8.42022	457.233	7	2	0.5379	TRUE
CHEMBL203645	3.8	nM	CCCC#CC(=O)Nc1cc2c(Nc3ccc(F)c(Cl)c3)ncnc2cn1	8.42022	383.095	5	2	4.3029	TRUE
CHEMBL566233	3.8	nM	O=C(NO)[C@H]1C[C@H](OC(=O)N2CCCC2)CN[C@@H]1C(=O)N1CCN(c2ccccc2)CC1	8.42022	445.233	7	3	0.4197	TRUE
CHEMBL51659	3.9	nM	C=CC(=O)Nc1cc2c(Nc3cccc(Br)c3)ncnc2cn1	8.40894	369.023	5	2	3.6554	TRUE
CHEMBL3959248	4	nM	COCCOc1cc2ncnc(Nc3ccc4c(cnn4Cc4ccccc4)c3)c2cc1NC(=O)/C=C/CN(C)C	8.39794	551.264	9	2	4.8529	TRUE
CHEMBL1645473	4	nM	NC1CCN(Cc2ccn3ncnc(Nc4cccc(Cl)c4)c23)CC1	8.39794	356.152	6	2	3.0494	TRUE
CHEMBL411897	4	nM	COC1CCN(CCOc2n[nH]c3ncnc(Nc4ccc(OCc5ccccn5)c(Cl)c4)c23)CC1	8.39794	509.194	9	2	4.2135	TRUE
CHEMBL257861	4	nM	OCCOc1n[nH]c2ncnc(Nc3ccc(OCc4ccccn4)c(Cl)c3)c12	8.39794	412.105	8	3	3.095	TRUE
CHEMBL272935	4	nM	CN1CCN(CCCOc2n[nH]c3ncnc(Nc4ccc(OCc5ccccn5)c(Cl)c4)c23)CC1	8.39794	508.21	9	2	3.7402	TRUE
CHEMBL479171	4	nM	OCc1ccc(-c2cc3c(Nc4ccc(OCc5ccccc5)cc4)ncnc3cn2)o1	8.39794	424.154	7	2	5.0997	TRUE
CHEMBL249928	4	nM	CN(CCOc1cccc2ncnc(Nc3ccc(OCc4ccccn4)c(Cl)c3)c12)C(=O)CO	8.39794	493.152	8	2	3.8303	TRUE
CHEMBL1080506	4	nM	Cc1c(C(=O)NCCN2CCOCC2)[nH]c2cnnc(Nc3ccc(OCc4cccc(F)c4)c(Cl)c3)c12	8.39794	538.19	7	3	4.44342	TRUE
CHEMBL1645474	4	nM	NC1CCN(Cc2ccn3ncnc(Nc4cccc(Br)c4)c23)CC1	8.39794	400.101	6	2	3.1585	TRUE
CHEMBL5183924	4.05	nM	C=C(F)C(=O)Nc1cc2c(Nc3ccc(Oc4cc5nncn5cn4)c(C)c3)ncnc2cc1OCC	8.39254	500.172	10	2	4.73222	TRUE
CHEMBL2148051	4.1	nM	CC(C(=O)NCCn1ccc2ncnc(Nc3ccc(Oc4cccc(Cl)c4)c(Cl)c3)c21)S(C)(=O)=O	8.38722	547.085	8	2	4.8233	TRUE
CHEMBL1923006	4.1	nM	OCCn1ccc2ncnc(Nc3ccc(Oc4cccc(Cl)c4)c(Cl)c3)c21	8.38722	414.065	6	2	5.2663	TRUE
CHEMBL288812	4.2	nM	Cn1nc(C(C)(C)C)cc1NC(=O)Nc1ccc(Cc2ccncc2)cc1	8.37675	363.206	4	2	4.3474	TRUE
CHEMBL31373	4.3	nM	C=CC(=O)Nc1ccc2ncnc(Nc3ccc(F)c(Cl)c3)c2c1	8.36653	342.068	4	2	4.2904	TRUE
CHEMBL1923019	4.3	nM	O=C(CO)NCCn1ccc2ncnc(Nc3ccc(Oc4cccc(C(F)(F)F)c4)c(Cl)c3)c21	8.36653	505.113	7	3	4.7479	TRUE
CHEMBL569166	4.3	nM	O=C(NO)[C@H]1CC(CC(=O)N2CCCC2)CN[C@@H]1C(=O)N1CC=C(c2ccccc2)CC1	8.36653	440.242	5	3	1.4145	TRUE
CHEMBL572302	4.4	nM	CN1C[C@@H](OC(=O)N2CCCCCC2)C[C@H](C(=O)NO)[C@H]1C(=O)N1CCN(c2ccccc2)CC1	8.35655	487.279	7	2	1.5421	TRUE
CHEMBL1922999	4.6	nM	Cc1cccc(Oc2ccc(Nc3ncnc4cc[nH]c34)cc2Cl)c1	8.33724	350.093	4	2	5.45562	TRUE
CHEMBL3353410	4.8	nM	C=CC(=O)Nc1cc(Nc2nccc(-c3cn(C)c4ccccc34)n2)c(OC)cc1N(C)CCN(C)C	8.31876	499.27	8	2	4.5098	TRUE
CHEMBL1645470	5	nM	Cc1cccc(Nc2ncnn3ccc(CN4CCC(N)CC4)c23)c1	8.30103	336.206	6	2	2.70442	TRUE
CHEMBL257873	5	nM	Cc1ccc(Oc2ccc(Nc3ncnc4[nH]nc(OCCN5CCC(O)CC5)c34)cc2F)cn1	8.30103	479.208	9	3	3.56682	TRUE
CHEMBL403435	5	nM	Cc1cc(Nc2ncnc3[nH]nc(OCCN4CCC(O)CC4)c23)ccc1OCc1ccccn1	8.30103	475.233	9	3	3.21442	TRUE
CHEMBL404405	5	nM	OC1CCN(CCOc2n[nH]c3ncnc(Nc4ccc(OCc5ccccn5)c(Cl)c4)c23)CC1	8.30103	495.179	9	3	3.5594	TRUE
CHEMBL136058	5	nM	O=C(/C=C/C(=O)Nc1cc2c(Nc3cccc(Br)c3)ncnc2cn1)NCCCN1CCOCC1	8.30103	539.128	8	3	2.8641	TRUE
CHEMBL1923010	5.1	nM	OCCOCCn1ccc2ncnc(Nc3ccc(Oc4cccc(C(F)(F)F)c4)c(Cl)c3)c21	8.29243	492.118	7	2	5.6483	TRUE
CHEMBL3545154	5.3	nM	C=CC(=O)N1CCC(Oc2cc3c(Nc4ccc(Cl)c(Cl)c4F)ncnc3cc2OC)CC1	8.27572	490.097	6	1	5.3837	TRUE
CHEMBL4793338	5.4	nM	C=CC(=O)Nc1cc2c(Nc3ccc(F)c(Cl)c3)ncnc2cc1OCc1cn(CCC(=O)NO)nn1	8.26761	526.128	10	4	3.3564	TRUE
CHEMBL202424	5.4	nM	CCCCC#CC(=O)Nc1cc2c(Nc3ccc(F)c(Cl)c3)ncnc2cn1	8.26761	397.111	5	2	4.693	TRUE
CHEMBL576061	5.6	nM	O=C(NO)[C@H]1CC(CC(=O)N2CCCC2)CN[C@@H]1C(=O)N1CC[C@H](c2ccccc2)C1	8.25181	428.242	5	3	1.1147	TRUE
CHEMBL569388	5.6	nM	O=C(NO)[C@H]1CC(OC(=O)N2CCCC2)CN[C@@H]1C(=O)N1CC=C(c2ccccc2)CC1	8.25181	442.222	6	3	1.3868	TRUE
CHEMBL4759072	5.7	nM	C=CC(=O)Nc1cc2c(Nc3ccc(F)c(Cl)c3)ncnc2cc1OCc1cn(CCCC(=O)NO)nn1	8.24413	540.144	10	4	3.7465	TRUE
CHEMBL285063	5.7	nM	C=CC(=O)Nc1ccc2ncnc(Nc3cccc(Br)c3)c2c1	8.24413	368.027	4	2	4.2604	TRUE
CHEMBL2048798	6	nM	OCCn1ccc2ncnc(Nc3ccc(Oc4cccc5sccc45)c(Cl)c3)c21	8.22185	436.076	7	2	5.8276	TRUE
CHEMBL256784	6	nM	C[C@H](Oc1cccc2ncnc(Nc3ccc4c(cnn4Cc4cccc(F)c4)c3)c12)C(=O)N(C)C	8.22185	484.202	7	1	4.766	TRUE
CHEMBL1645472	6	nM	NC1CCN(Cc2ccn3ncnc(Nc4cccc(F)c4)c23)CC1	8.22185	340.181	6	2	2.5351	TRUE
CHEMBL1645471	6	nM	Cc1ccc(Nc2ncnn3ccc(CN4CCC(N)CC4)c23)cc1	8.22185	336.206	6	2	2.70442	TRUE
CHEMBL1645476	6	nM	NC1CCN(Cc2ccn3ncnc(Nc4ccc(F)c(Cl)c4)c23)CC1	8.22185	374.142	6	2	3.1885	TRUE
CHEMBL255237	6	nM	COCCO/N=C/c1c(N)ncnc1Nc1ccc2c(cnn2Cc2cccc(F)c2)c1	8.22185	435.182	9	2	3.3364	TRUE
CHEMBL587723	6	nM	CCN1CCN(Cc2ccc(-c3cc4c(N[C@H](C)c5ccccc5)ncnc4[nH]3)cc2)CC1	8.22185	440.269	5	2	4.9355	TRUE
CHEMBL257860	6	nM	OC1CCN(CCCOc2n[nH]c3ncnc(Nc4ccc(OCc5ccccn5)c(Cl)c4)c23)CC1	8.22185	509.194	9	3	3.9495	TRUE
CHEMBL3892310	6	nM	CN(C)C/C=C/C(=O)Nc1cc2c(Nc3ccc(F)c(Cl)c3)ncnc2cc1OCC1C2COCC21	8.22185	511.179	7	2	4.4934	TRUE
CHEMBL4796265	6.1	nM	CN1CCN(CC(=O)Nc2ccc3ncnc(Nc4ccc(OCc5cccc(F)c5)c(Cl)c4)c3c2)CC1	8.21467	534.195	7	2	4.9308	TRUE
CHEMBL4759112	6.2	nM	CN(C)C/C=C/C(=O)Nc1cc2ncnc(Nc3ccc(F)c(Cl)c3)c2cc1O[C@@H]1CCOC1	8.20761	485.163	7	2	4.3899	TRUE
CHEMBL1093234	6.3	nM	O=C(Nc1cccc(-c2nc3sccn3c2-c2ccnc(Nc3ccccc3)n2)c1)c1ccccc1	8.20066	488.142	7	2	6.5157	TRUE
CHEMBL2148044	6.3	nM	CS(=O)(=O)CC(=O)NCCn1ccc2ncnc(Nc3ccc(Oc4cccc(C(F)(F)F)c4)c(Cl)c3)c21	8.20066	567.095	8	2	4.8002	TRUE
CHEMBL5180965	6.31	nM	Cc1cc(Nc2ncnc3cc(O)c(NC(=O)/C=C/[C@H]4CCCN4C)cc23)ccc1Oc1ccn2cnnc2c1	8.19997	536.228	10	3	4.81132	TRUE
CHEMBL31419	6.4	nM	C=CC(=O)Nc1cc2c(Nc3cccc(Br)c3)ncnc2cc1OCCCN1CCOCC1	8.19382	511.122	7	2	4.3615	TRUE
CHEMBL3989868	6.9	nM	Cc1cc(Nc2ncnc3ccc(NC4=NC(C)(C)CO4)cc23)ccc1Oc1ccn2ncnc2c1	8.16115	480.202	10	2	5.09352	TRUE
CHEMBL1645466	7	nM	C#Cc1cccc(Nc2ncnn3ccc(CN4CCC(N)CC4)c23)c1	8.1549	346.191	6	2	2.3773	TRUE
CHEMBL498133	7	nM	Nc1ncnc(Nc2ccc3c(cnn3Cc3cccc(F)c3)c2)c1/C=N/N1CCOCC1	8.1549	446.198	9	2	3.0056	TRUE
CHEMBL402294	7	nM	CCO/N=C/c1c(N)ncnc1Nc1ccc2c(cnn2Cc2cccc(F)c2)c1	8.1549	405.171	8	2	3.7099	TRUE
CHEMBL4744985	7.3	nM	C=CC(=O)Nc1cc2c(Nc3ccc(F)c(Cl)c3)ncnc2cc1OCc1cn(CCCCC(=O)NO)nn1	8.13668	554.159	10	4	4.1366	TRUE
CHEMBL584116	7.3	nM	CN1C[C@@H](OC(=O)N2CCCCC2)C[C@H](C(=O)NO)[C@H]1C(=O)N1CCN(c2ccccc2)CC1	8.13668	473.264	7	2	1.152	TRUE
CHEMBL280757	7.3	nM	C=CC(=O)Nc1ccc2ncnc(Nc3ccc(F)c(Br)c3)c2c1	8.13668	386.018	4	2	4.3995	TRUE
CHEMBL430571	7.6	nM	C=CC(=O)Nc1ccc2ncnc(Nc3ccc(OCc4ccccc4)cc3)c2c1	8.11919	396.159	5	2	5.0769	TRUE
CHEMBL1923013	7.7	nM	OCCNCCn1ccc2ncnc(Nc3ccc(Oc4cccc(C(F)(F)F)c4)c(Cl)c3)c21	8.11351	491.134	7	3	5.2213	TRUE
CHEMBL4758224	7.9	nM	C=CC(=O)Nc1cccc(-c2c[nH]c3ncnc(Nc4ccc5c(ccn5Cc5ccccc5)c4)c23)c1	8.10237	484.201	5	3	6.496	TRUE
CHEMBL256783	8	nM	C[C@@H](Oc1cccc2ncnc(Nc3ccc4c(cnn4Cc4cccc(F)c4)c3)c12)C(=O)N(C)C	8.09691	484.202	7	1	4.766	TRUE
CHEMBL1922901	8	nM	N#Cc1ccccc1Oc1ccc(Nc2ncnc3cc[nH]c23)cc1Cl	8.09691	361.073	5	2	5.01888	TRUE
CHEMBL498134	8	nM	CN1CCN(/N=C/c2c(N)ncnc2Nc2ccc3c(cnn3Cc3cccc(F)c3)c2)CC1	8.09691	459.23	9	2	2.9208	TRUE
CHEMBL4794998	8	nM	C=CC(=O)Nc1cc2c(Nc3cccc(Cl)c3F)ncnc2cc1OCc1cn(CCCC(=O)NO)nn1	8.09691	540.144	10	4	3.7465	TRUE
CHEMBL514566	8	nM	Nc1ncnc(Nc2ccc3c(cnn3Cc3cccc(F)c3)c2)c1/C=N/N1CCN(CCO)CC1	8.09691	489.24	10	3	2.2833	TRUE
CHEMBL4068839	8.1	nM	C=CC(=O)N1CCC[C@@H](n2nc(-c3ccc(OCc4ccccn4)c(Cl)c3)c3c(N)ncnc32)C1	8.09151	489.168	8	1	4.0524	TRUE
CHEMBL585886	8.1	nM	COC(=O)N1C[C@@H](OC(=O)N2CCCC2)C[C@H](C(=O)NO)[C@H]1C(=O)N1CCN(c2ccccc2)CC1	8.09151	503.238	8	2	0.8985	TRUE
CHEMBL342828	8.1	nM	O=C(/C=C/C(=O)Nc1cc2c(Nc3cccc(Br)c3)ncnc2cn1)NCCCn1ccnc1	8.09151	520.097	8	3	3.4286	TRUE
CHEMBL27685	8.2	nM	C=CC(=O)Nc1cc2c(Nc3ccc(F)c(Br)c3)ncnc2cc1OCCCN1CCOCC1	8.08619	529.112	7	2	4.5006	TRUE
CHEMBL1922902	8.2	nM	N#Cc1cccc(Oc2ccc(Nc3ncnc4cc[nH]c34)cc2Cl)c1	8.08619	361.073	5	2	5.01888	TRUE
CHEMBL1921812	8.3	nM	Clc1cccc(Oc2ccc(Nc3ncnc4cc[nH]c34)cc2Cl)c1	8.08092	370.039	4	2	5.8006	TRUE
CHEMBL572301	8.5	nM	CC(C)OC(=O)N(C)C1CN[C@H](C(=O)N2CC=C(c3ccccc3)CC2)[C@@H](C(=O)NO)C1	8.07058	444.237	6	3	1.6312	TRUE
CHEMBL53203	8.6	nM	C=CC(=O)Nc1ccc2ncnc(Nc3ccc(Oc4ccccc4)cc3)c2c1	8.0655	382.143	5	2	5.2902	TRUE
CHEMBL54088	8.8	nM	C=CC(=O)Nc1cc2c(Nc3cccc(C)c3)ncnc2cn1	8.05552	305.128	5	2	3.20132	TRUE
CHEMBL1645467	9	nM	NC1CCN(Cc2ccn3ncnc(Nc4ccccc4)c23)CC1	8.04576	322.191	6	2	2.396	TRUE
CHEMBL206029	9	nM	CS(=O)(=O)CCNC(=O)NCc1cccc(C#Cc2cncnc2Nc2ccc(OCc3cccc(F)c3)c(Cl)c2)n1	8.04576	608.141	8	3	4.2303	TRUE
CHEMBL3921302	9	nM	CN1CCN(c2ccc(Nc3ncnc4cc5oc(=O)n(CCOC(=O)CCl)c5cc34)cc2Cl)CC1	8.04576	530.124	10	1	3.4685	TRUE
CHEMBL31965	9	nM	C=CC(=O)Nc1cc2c(Nc3ccc(F)c(Cl)c3)ncnc2cc1OCCCN1CCOCC1	8.04576	485.163	7	2	4.3915	TRUE
CHEMBL1922898	9.3	nM	Fc1ccccc1Oc1ccc(Nc2ncnc3cc[nH]c23)cc1Cl	8.03152	354.068	4	2	5.2863	TRUE
CHEMBL1873475	9.4	nM	C=CC(=O)N1CCC[C@@H](n2nc(-c3ccc(Oc4ccccc4)cc3)c3c(N)ncnc32)C1	8.02687	440.196	7	1	4.2173	TRUE
CHEMBL570760	10	nM	CN(C(=O)c1ccccc1)C1CN[C@H](C(=O)N2CC=C(c3ccccc3)CC2)[C@@H](C(=O)NO)C1	8	462.227	5	3	1.9266	TRUE
CHEMBL4783947	10.4	nM	O=C(CNCCO)Nc1ccc2ncnc(Nc3ccc(OCc4cccc(F)c4)c(Cl)c3)c2c1	7.98297	495.147	7	4	4.2653	TRUE
CHEMBL597551	10.6	nM	COc1cc2ncnc(Nc3ccc(F)c(Cl)c3)c2cc1OCCC(=O)NO	7.97469	406.084	7	3	3.4488	TRUE
CHEMBL5209046	10.77	nM	Cc1cc(Nc2c(C#N)cnc3ccc(NC(=O)/C=C/[C@H]4CCCN4C)cc23)ccc1Oc1cc2nncn2cn1	7.96778	545.229	10	2	4.9774	TRUE
CHEMBL1923004	11	nM	Cn1ccc2ncnc(Nc3ccc(Oc4cccc(C(F)(F)F)c4)c(Cl)c3)c21	7.95861	418.081	5	1	6.1764	TRUE
CHEMBL3969056	11	nM	CN(C)C/C=C/C(=O)Nc1cc2c(Nc3ccc(Cc4ccccn4)cc3)ncnc2cn1	7.95861	439.212	7	2	3.8105	TRUE
CHEMBL568346	11	nM	O=C(NO)[C@H]1C[C@H](OC(=O)N2CCCC2)CN[C@@H]1C(=O)N1CC=C(c2ccccc2)C1	7.95861	428.206	6	3	0.9967	TRUE
CHEMBL257872	11	nM	Cc1ccc(Oc2ccc(Nc3ncnc4[nH]nc(OCCN5CCC(O)CC5)c34)cc2C)cn1	7.95861	475.233	9	3	3.73614	TRUE
CHEMBL1922900	11	nM	Clc1ccccc1Oc1ccc(Nc2ncnc3cc[nH]c23)cc1Cl	7.95861	370.039	4	2	5.8006	TRUE
CHEMBL497804	11	nM	O[C@H]1CN[C@H](C#Cc2cc3ncnc(Nc4ccc(OCc5cccc(F)c5)c(Cl)c4)c3s2)C1	7.95861	494.098	7	3	4.8807	TRUE
CHEMBL1614726	11	nM	OCCOCCn1ccc2ncnc(Nc3cnc(Oc4cccc(C(F)(F)F)c4)c(Cl)c3)c21	7.95861	493.113	8	2	5.0433	TRUE
CHEMBL4787483	11	nM	C=CC(=O)Nc1cccc(-c2c[nH]c3ncnc(Nc4ccc(OCc5ccccn5)c(Cl)c4)c23)c1	7.95861	496.141	6	3	6.1204	TRUE
CHEMBL585299	11.5	nM	CN1C[C@@H](OC(=O)N2CCCC2)C[C@H](C(=O)NO)[C@H]1C(=O)N1CCN(c2ccccc2)CC1	7.9393	459.248	7	2	0.7619	TRUE
CHEMBL483321	12	nM	COCC(=O)NC/C=C/c1ccc2ncnc(Nc3ccc(Oc4ccc(C)nc4)c(C)c3)c2c1	7.92082	469.211	7	2	4.95334	TRUE
CHEMBL255871	12	nM	CO/N=C/c1c(N)ncnc1Nc1ccc2c(cnn2Cc2cccc(F)c2)c1	7.92082	391.156	8	2	3.3198	TRUE
CHEMBL4778909	12	nM	C=CC(=O)Nc1cccc(-c2c[nH]c3ncnc(Nc4ccc5c(cnn5Cc5ccccc5)c4)c23)c1	7.92082	485.196	6	3	5.891	TRUE
CHEMBL417478	12	nM	C=CC(=O)Nc1nc2c(Nc3ccc(F)c(Cl)c3)ncnc2cc1/C=C/CCN1CCOCC1	7.92082	482.163	7	2	4.4209	TRUE
CHEMBL1923007	12	nM	OCCn1ccc2ncnc(Nc3ccc(Oc4cccc(C(F)(F)F)c4)c(Cl)c3)c21	7.92082	448.091	6	2	5.6317	TRUE
CHEMBL381604	12	nM	Nc1nccc(C#Cc2cncnc2Nc2ccc(OCc3cccc(F)c3)c(Cl)c2)n1	7.92082	446.106	7	2	4.3637	TRUE
CHEMBL404181	12	nM	C[C@H](Oc1cccc2ncnc(Nc3ccc4c(cnn4Cc4nccs4)c3)c12)C(=O)N1CCOCC1	7.92082	515.174	10	1	3.854	TRUE
CHEMBL28418	12	nM	C=CC(=O)Nc1ccc2ncnc(Nc3ccc(F)c(Cl)c3)c2n1	7.92082	343.064	5	2	3.6854	TRUE
CHEMBL597752	12.4	nM	COc1cc2ncnc(Nc3ccc(F)c(Cl)c3)c2cc1OCCCC(=O)NO	7.90658	420.1	7	3	3.8389	TRUE
CHEMBL1923000	13	nM	Fc1cccc(COc2ccc(Nc3ncnc4cc[nH]c34)cc2Cl)c1	7.88606	368.084	4	2	5.073	TRUE
CHEMBL204570	13	nM	OCc1cccc(C#Cc2cncnc2Nc2ccc(OCc3cccc(F)c3)c(Cl)c2)n1	7.88606	460.11	6	2	4.8788	TRUE
CHEMBL248114	13	nM	Cc1cncc(Cn2ncc3cc(Nc4ncnn5ccc(CN6CCC(N)CC6)c45)ccc32)c1	7.88606	467.255	9	2	3.49742	TRUE
CHEMBL3133816	13	nM	CC(=O)c1ccc2[nH]c3nccc(Nc4cccc(O)c4)c3c2c1	7.88606	317.116	4	3	4.3679	TRUE
CHEMBL205798	13	nM	CC(=O)Nc1cccc(C#Cc2cncnc2Nc2ccc(OCc3cccc(F)c3)c(Cl)c2)c1	7.88606	486.126	5	2	5.9499	TRUE
CHEMBL4759178	13	nM	C=CC(=O)Nc1cccc(-c2c[nH]c3ncnc(Nc4ccc(Oc5ccccc5)cc4)c23)c1	7.88606	447.17	5	3	6.2853	TRUE
CHEMBL334801	13	nM	CN(C)CCCNC(=O)/C=C/C(=O)Nc1cc2c(Nc3cccc(Br)c3)ncnc2cn1	7.88606	497.117	7	3	3.0935	TRUE
CHEMBL4759697	13	nM	C=CC(=O)Nc1cc2c(Nc3cccc(Cl)c3F)ncnc2cc1OCc1cn(CCC(=O)NO)nn1	7.88606	526.128	10	4	3.3564	TRUE
CHEMBL5286014	13	nM	C=CC(=O)N1CCC[C@H](n2nc(C(=O)c3ccc(CC(=O)N(C)C)c(C)c3C)c3c(N)ncnc32)C1	7.88606	489.249	8	1	2.23654	TRUE
CHEMBL496174	13	nM	Fc1cccc(COc2ccc(Nc3ncnc4cc(C#C[C@H]5CCCN5)sc34)cc2Cl)c1	7.88606	478.103	6	2	5.9099	TRUE
CHEMBL488350	13	nM	COC(=O)CNCc1ccc(-c2cc3c(Nc4ccc(OCc5ccccc5)cc4)ncnc3cn2)o1	7.88606	495.191	9	2	4.87	TRUE
CHEMBL434827	14	nM	CCN(CC)CCCNC(=O)/C=C/C(=O)Nc1cc2c(Nc3cccc(Br)c3)ncnc2cn1	7.85387	525.149	7	3	3.8737	TRUE
CHEMBL3930506	14	nM	O=C(/C=C/CN1CCCCC1)Nc1cc2c(Nc3ccc(F)c(Cl)c3)ncnc2cn1	7.85387	440.153	6	2	4.5415	TRUE
CHEMBL329856	14	nM	CN(C)CC#CC(=O)Nc1ccc2ncnc(Nc3cccc(Br)c3)c2c1	7.85387	423.069	5	2	3.6394	TRUE
CHEMBL4741898	14	nM	C=CC(=O)Nc1cccc(-c2c(-c3ccc(N4CCN(C)CC4)cc3)[nH]c3ncnc(OCC)c23)c1	7.85387	482.243	6	2	4.5669	TRUE
CHEMBL514938	14	nM	Fc1cccc(COc2ccc(Nc3ncnc4sc(-c5ccco5)cc34)cc2Cl)c1	7.85387	451.056	6	1	7.0664	TRUE
CHEMBL2347958	14	nM	CN(C)C/C=C/C(=O)Nc1cc2c(Nc3ccc(F)c(Cl)c3)ncnc2cc1O[C@@H]1CCOC1	7.85387	485.163	7	2	4.3899	TRUE
CHEMBL4783667	15	nM	C=CC(=O)Nc1cc(-c2c[nH]c3ncnc(Nc4ccc(CN5C(=O)c6ccccc6C5=O)cc4)c23)ccc1OCCO	7.82391	574.196	8	4	4.6603	TRUE
CHEMBL1923012	15	nM	OCCCCCn1ccc2ncnc(Nc3ccc(Oc4cccc(C(F)(F)F)c4)c(Cl)c3)c21	7.82391	490.138	6	2	6.802	TRUE
CHEMBL596736	15	nM	COc1cc2ncnc(Nc3ccc(F)c(Cl)c3)c2cc1OCCCCC(=O)NO	7.82391	434.116	7	3	4.229	TRUE
CHEMBL569853	15.5	nM	CC(C)C(=O)N(C)C1CN[C@H](C(=O)N2CC=C(c3ccccc3)CC2)[C@@H](C(=O)NO)C1	7.80967	428.242	5	3	1.2688	TRUE
CHEMBL4637274	15.7	nM	C#Cc1cccc(Nc2cccc3cc(OC)c(OCCCCCCC(=O)NO)cc23)c1	7.8041	432.205	5	3	5.408	TRUE
CHEMBL598797	15.7	nM	C#Cc1cccc(Nc2ncnc3cc(OC)c(OCCCCCCC(=O)NO)cc23)c1	7.8041	434.195	7	3	4.198	TRUE
CHEMBL1922897	16	nM	Clc1cc(Nc2ncnc3cc[nH]c23)ccc1Oc1ccccc1	7.79588	336.078	4	2	5.1472	TRUE
CHEMBL233325	16	nM	O[C@H]1CNCCN(Cc2ccn3ncnc(Nc4ccc5c(cnn5Cc5cccc(F)c5)c4)c23)C1	7.79588	486.229	9	3	2.7761	TRUE
CHEMBL4783641	16	nM	C=CC(=O)Nc1cc2c(Nc3cccc(Cl)c3F)ncnc2cc1OCc1cn(CCCCC(=O)NO)nn1	7.79588	554.159	10	4	4.1366	TRUE
CHEMBL30432	16	nM	CN(C)c1cc2c(Nc3ccc4c(cnn4Cc4ccccc4)c3)ncnc2cn1	7.79588	395.186	7	1	4.2324	TRUE
CHEMBL94062	16	nM	O=C(C#CCO)Nc1ccc2ncnc(Nc3cccc(Br)c3)c2c1	7.79588	396.022	5	3	3.0701	TRUE
CHEMBL3633929	16	nM	CC(=O)Nc1ccc2ncnc(Nc3ccc(OCc4ccccn4)c(Cl)c3)c2c1	7.79588	419.115	6	2	4.9592	TRUE
CHEMBL461426	16	nM	NC(=O)O[C@H]1CN[C@H](C#Cc2cc3ncnc(Nc4ccc(OCc5cccc(F)c5)c(Cl)c4)c3s2)C1	7.79588	537.104	8	3	4.9837	TRUE
CHEMBL3967962	17	nM	O=C(/C=C/CN1CCCC1)Nc1cc2c(Nc3ccc(Cc4ccccn4)cc3)ncnc2cn1	7.76955	465.228	7	2	4.3447	TRUE
CHEMBL401713	17	nM	COc1cc(Nc2ncnc3[nH]nc(OCCN4CCC(O)CC4)c23)ccc1OCc1ccccn1	7.76955	491.228	10	3	2.9146	TRUE
CHEMBL448628	17	nM	COc1ccccc1Cc1nc2ccc(-c3nn([C@H]4CC[C@H](N5CCN(C(=O)N(C)C)CC5)CC4)c4ncnc(N)c34)cc2[nH]1	7.76955	608.334	9	2	4.3341	TRUE
CHEMBL1923005	17	nM	Cn1ccc2ncnc(Nc3ccc(Oc4cccc(OC(F)(F)F)c4)c(Cl)c3)c21	7.76955	434.076	6	1	6.0562	TRUE
CHEMBL256297	18	nM	CO/N=C/c1c(N)ncnc1Nc1ccc(OCc2cccc(F)c2)c(Cl)c1	7.74473	401.105	7	2	4.1542	TRUE
CHEMBL228276	18	nM	Cc1cc(Nc2ncnc3cnc(N4CCOCC4)cc23)ccc1OC1CCN(C(=O)C2CCCC2)CC1	7.74473	516.285	8	1	4.47342	TRUE
CHEMBL373532	18	nM	O=C(NO)[C@H]1CC2(CC2)CN[C@@H]1C(=O)N1CC=C(c2ccccc2)CC1	7.74473	355.19	4	3	1.566	TRUE
CHEMBL2048790	18	nM	O=C1NCc2cc(Oc3ccc(Nc4ncnc5ccn(CCO)c45)cc3Cl)ccc21	7.74473	435.11	7	3	3.8563	TRUE
CHEMBL569880	18	nM	C=CC(=O)N1CCC[C@H]1C(=O)Nc1cc2c(Nc3ccc(F)c(Cl)c3F)ncnc2cc1OCCOC	7.74473	531.148	7	2	4.4457	TRUE
CHEMBL394057	18	nM	O=C(O)COCc1ccn2ncnc(Nc3ccc4c(cnn4Cc4cccc(F)c4)c3)c12	7.74473	446.15	8	2	3.6112	TRUE
CHEMBL248322	18	nM	NC1CCN(Cc2ccn3ncnc(Nc4ccc(OCc5cccc[n+]5[O-])c(Cl)c4)c23)CC1	7.74473	479.184	8	2	3.2618	TRUE
CHEMBL2348416	18	nM	COC(=O)C1=Cc2c(ncnc2Nc2ccc(Oc3cccc4sccc34)c(Cl)c2)NCC1	7.74473	478.087	8	2	6.2526	TRUE
CHEMBL496628	18	nM	O=C(NO)[C@H]1C[C@@H](CC(=O)N2CCCCC2)CC[C@@H]1C(=O)N1CCN(c2ccccc2)CC1	7.74473	456.274	5	2	2.2757	TRUE
CHEMBL524457	18	nM	Nc1ncnc(Nc2ccc3c(cnn3Cc3cccc(F)c3)c2)c1/C=N/N1CCCCC1	7.74473	444.219	8	2	4.1593	TRUE
CHEMBL565714	18	nM	CCC1=C2C(Nc3ccc4c(cnn4Cc4ccccc4)c3)=NC=NC2N=C1NC(=O)OCCN1CCNCC1	7.74473	539.276	10	3	3.0131	TRUE
CHEMBL565467	18	nM	CCC1=C2C(Nc3ccc4c(cnn4Cc4ccccc4)c3)=NC=NC2N=C1NC(=O)O[C@H]1CC[C@H](N)CC1	7.74473	524.265	9	3	4.3778	TRUE
CHEMBL255376	19	nM	OC1CCN(CCOc2n[nH]c3ncnc(Nc4ccc(OCc5cccc(F)c5)c(Cl)c4)c23)CC1	7.72125	512.174	8	3	4.3035	TRUE
CHEMBL598377	19	nM	COc1cc2ncnc(Nc3ccc(F)c(Cl)c3)c2cc1OCCCCCCC(=O)NO	7.72125	462.147	7	3	5.0092	TRUE
CHEMBL3970330	19	nM	COCCOc1cc2ncnc(Nc3ccc4c(cnn4Cc4ccccc4)c3)c2cc1NC(=O)/C=C/CN1CCN(C)CC1	7.72125	606.307	10	2	4.5387	TRUE
CHEMBL403774	19	nM	C[C@@H](Oc1cccc2ncnc(Nc3ccc(OCc4ccccn4)c(Cl)c3)c12)C(=O)N1CCOCC1	7.72125	519.167	8	1	4.6269	TRUE
CHEMBL2138625	19	nM	C=CC(=O)Nc1cc2c(Nc3ccc(F)c(Cl)c3)ncnc2cc1C#CC(C)(C)N1CCN(C)CC1	7.72125	506.2	6	2	4.6679	TRUE
CHEMBL477078	19	nM	O=C(O)CNCc1ccc(-c2cc3c(Nc4ccc(OCc5ccccc5)cc4)ncnc3cn2)o1	7.72125	481.175	8	3	4.7816	TRUE
CHEMBL403785	19	nM	C[C@@H](COc1cccc2ncnc(Nc3ccc(OCc4ccccn4)c(Cl)c3)c12)N(C)C(=O)CO	7.72125	507.167	8	2	4.2188	TRUE
CHEMBL493428	19	nM	CS(=O)(=O)CCNCCCCOc1ccc2ncnc(Nc3ccc4c(cnn4Cc4cccc(F)c4)c3)c2c1	7.72125	562.216	9	2	4.7037	TRUE
CHEMBL499534	20	nM	O=C(O[C@H]1CN[C@H](C#Cc2cc3ncnc(Nc4ccc(OCc5cccc(F)c5)c(Cl)c4)c3s2)C1)N1CCNCC1	7.69897	606.162	9	3	4.9302	TRUE
CHEMBL567197	20	nM	CCC1=C2C(Nc3ccc4c(cnn4Cc4ccccc4)c3)=NC=NC2N=C1NC(=O)O[C@H]1CC[C@@](C)(N)CC1	7.69897	538.28	9	3	4.7679	TRUE
CHEMBL1922899	20	nM	Fc1cccc(Oc2ccc(Nc3ncnc4cc[nH]c34)cc2Cl)c1	7.69897	354.068	4	2	5.2863	TRUE
CHEMBL1645465	20	nM	C#Cc1cccc(Nc2ncnn3ccc(COC[C@@H]4CNCCO4)c23)c1	7.69897	363.17	7	2	1.9592	TRUE
CHEMBL497863	20	nM	Nc1ncnc(Nc2ccc3c(cnn3Cc3cccc(F)c3)c2)c1/C=N/NCC(F)(F)F	7.69897	458.159	8	3	3.8253	TRUE
CHEMBL1645469	20	nM	Cc1ccccc1Nc1ncnn2ccc(CN3CCC(N)CC3)c12	7.69897	336.206	6	2	2.70442	TRUE
CHEMBL598163	20	nM	COc1cc2ncnc(Nc3ccc(F)c(Cl)c3)c2cc1OCCCCCC(=O)NO	7.69897	448.131	7	3	4.6191	TRUE
CHEMBL597773	20.1	nM	COc1cc2ncnc(Nc3ccc(F)c(Cl)c3)c2cc1NC(=O)CCCCCCC(=O)NO	7.6968	489.158	7	4	4.959	TRUE
CHEMBL5280584	21	nM	Cc1ccccc1NC(=O)CSc1nc2cc3ccccc3cc2c(=O)n1-c1ccc(S(N)(=O)=O)cc1	7.67778	530.108	7	2	4.22552	TRUE
CHEMBL4799276	21	nM	C=CC(=O)Nc1cccc(-c2c(-c3ccc(N4CCN(C)CC4)cc3)[nH]c3ncnc(OC(C)C)c23)c1	7.67778	496.259	6	2	4.9554	TRUE
CHEMBL567873	21	nM	CCC1=C2C(Nc3ccc4c(cnn4Cc4ccccc4)c3)=NC=NC2N=C1NC(=O)OC[C@@H]1COCCN1	7.67778	526.244	10	3	3.0963	TRUE
CHEMBL3965948	21	nM	O=C(CBr)OCCn1c(=O)oc2cc3ncnc(Nc4ccc(N5CCOCC5)c(Cl)c4)c3cc21	7.67778	561.041	10	1	3.7094	TRUE
CHEMBL5277831	21	nM	Cc1ccc(NC(=O)CSc2nc3cc4ccccc4cc3c(=O)n2-c2ccc(S(N)(=O)=O)cc2)cc1	7.67778	530.108	7	2	4.22552	TRUE
CHEMBL439425	22	nM	C[C@@H](Oc1cccc2ncnc(Nc3ccc4c(cnn4Cc4cccc(F)c4)c3)c12)C(=O)N1CCOCC1	7.65758	526.213	8	1	4.5366	TRUE
CHEMBL31815	22	nM	C=CC(=O)Nc1ccc2ncnc(Nc3cccc(C)c3)c2c1	7.65758	304.132	4	2	3.80632	TRUE
CHEMBL248116	22	nM	NC1CCN(Cc2ccn3ncnc(Nc4ccc(OCc5ccccn5)c(Cl)c4)c23)CC1	7.65758	463.189	8	2	4.0234	TRUE
CHEMBL402113	22	nM	CO/N=C/c1c(N)ncnc1Nc1ccc2c(cnn2Cc2ccccc2)c1	7.65758	373.165	8	2	3.1807	TRUE
CHEMBL413987	22	nM	C[C@@H](CN(C)C(=O)CO)Oc1cccc2ncnc(Nc3ccc(OCc4ccccn4)c(Cl)c3)c12	7.65758	507.167	8	2	4.2188	TRUE
CHEMBL1923001	22	nM	Clc1cc(Nc2ncnc3cc[nH]c23)ccc1OCc1ccccn1	7.65758	351.089	5	2	4.3289	TRUE
CHEMBL402507	22	nM	Cc1ccc(Oc2ccc(Nc3ncnc4cccc(O[C@H](C)C(=O)N5CCOCC5)c34)cc2C)cn1	7.65758	499.222	8	1	4.80364	TRUE
CHEMBL583403	22	nM	CCC1=C2C(Nc3ccc4c(cnn4Cc4cccc(F)c4)c3)=NC=NC2N=C1NC(=O)OC[C@@H]1COCCN1	7.65758	544.235	10	3	3.2354	TRUE
CHEMBL1645462	22	nM	Cc1c(NC(=O)OC[C@@H]2COCCN2)cn2ncnc(Nc3ccc4c(cnn4Cc4cccc(F)c4)c3)c12	7.65758	530.219	10	3	3.85532	TRUE
CHEMBL3901296	22	nM	CN(C)C/C=C/C(=O)Nc1cc2c(Nc3ccc(F)c(Cl)c3)ncnc2cc1OC[C@@]12COC[C@@H]1C2	7.65758	511.179	7	2	4.6375	TRUE
CHEMBL2035810	22.4	nM	C=CC(=O)NCc1coc(-c2c(N)ncnc2Nc2ccc(OCc3ccccn3)c(Cl)c2)n1	7.64975	477.132	9	3	3.887	TRUE
CHEMBL3921129	23	nM	CCOc1cc2ncnc(Nc3ccc4c(cnn4Cc4ccccc4)c3)c2cc1NC(=O)/C=C/CN1CCN(C)CC1	7.63827	576.296	9	2	4.9122	TRUE
CHEMBL411799	23	nM	COc1cc(Nc2ncnc3cccc(O[C@H](C)C(=O)N4CCOCC4)c23)ccc1Oc1ccc(C)nc1	7.63827	515.217	9	1	4.50382	TRUE
CHEMBL411192	23	nM	Cc1cc(Nc2ncnc3cnc(N4CCOCC4)cc23)ccc1OC1CCN(C(=O)CC(C)(C)C)CC1	7.63827	518.301	8	1	4.71942	TRUE
CHEMBL248108	23	nM	NC1CCN(Cc2ccn3ncnc(Nc4ccc5c(cnn5Cc5cccc(F)c5)c4)c23)CC1	7.63827	470.234	8	2	3.9331	TRUE
CHEMBL583218	23	nM	CCC1=C2C(Nc3ccc4c(cnn4Cc4ccccc4)c3)=NC=NC2N=C1NC(=O)OCC1CCNCC1	7.63827	524.265	9	3	4.1075	TRUE
CHEMBL256362	23	nM	Cc1ccc(Oc2ccc(Nc3ncnc4cccc(O[C@H](C)C(=O)N(C)C)c34)cc2C)cn1	7.63827	457.211	7	1	5.03304	TRUE
CHEMBL4211949	23.2	nM	C=CC(=O)N[C@@H]1Cn2c(c(-c3ccc(Oc4ccccc4)cc3)c3c(N)ncnc32)C1=C	7.63451	423.17	6	2	4.1704	TRUE
CHEMBL138940	24	nM	O=C(/C=C/C(=O)Nc1cc2c(Nc3ccc(F)c(Cl)c3)ncnc2cn1)NCCCN1CCOCC1	7.61979	513.169	8	3	2.8941	TRUE
CHEMBL193578	24	nM	Clc1cc(Nc2ncnc3cccc(OC4CCOCC4)c23)ccc1OCc1ccccn1	7.61979	462.146	7	1	5.5586	TRUE
CHEMBL257198	24	nM	C[C@H](Oc1cccc2ncnc(Nc3ccc4c(cnn4Cc4nccs4)c3)c12)C(=O)N(C)C	7.61979	473.163	9	1	4.0834	TRUE
CHEMBL301018	24	nM	COc1cc2ncnc(Nc3ccc(F)c(Cl)c3)c2cc1OC	7.61979	333.068	5	1	4.1831	TRUE
CHEMBL194389	24	nM	COc1cccc2ncnc(Nc3ccc(OCc4ccccn4)c(Cl)c3)c12	7.61979	392.104	6	1	5.0094	TRUE
CHEMBL596754	24.2	nM	COc1cc2ncnc(Nc3ccc(F)c(Cl)c3)c2cc1SCCCCCCC(=O)NO	7.61618	478.124	7	3	5.7225	TRUE
CHEMBL402293	25	nM	CC(C)O/N=C/c1c(N)ncnc1Nc1ccc2c(cnn2Cc2cccc(F)c2)c1	7.60206	419.187	8	2	4.0984	TRUE
CHEMBL4112924	25	nM	CO[C@@H]1COC2C1OC[C@H]2Oc1cc2ncnc(Nc3ccc(F)c(Cl)c3)c2cc1NC(=O)/C=C/CN(C)C	7.60206	557.184	9	2	3.7822	TRUE
CHEMBL257197	26	nM	C[C@@H](Oc1cccc2ncnc(Nc3ccc4c(cnn4Cc4nccs4)c3)c12)C(=O)N(C)C	7.58503	473.163	9	1	4.0834	TRUE
CHEMBL202556	26	nM	O=C(C#CCN1CCOCC1)Nc1cc2c(Nc3ccc(F)c(Cl)c3)ncnc2cn1	7.58503	440.116	7	2	2.835	TRUE
CHEMBL3409484	26	nM	CS(=O)(=O)CCNCc1ccc(-c2cc3c(Nc4ccc(OCc5ccccc5)cc4)ncnc3cn2)o1	7.58503	529.178	9	2	4.7416	TRUE
CHEMBL248321	26	nM	NC1CCN(Cc2ccn3ncnc(Nc4ccc(OCc5cnccn5)c(Cl)c4)c23)CC1	7.58503	464.184	9	2	3.4184	TRUE
CHEMBL1921813	26	nM	COc1cccc(Oc2ccc(Nc3ncnc4cc[nH]c34)cc2Cl)c1	7.58503	366.088	5	2	5.1558	TRUE
CHEMBL53665	26	nM	C=CC(=O)Nc1ccc2ncnc(Nc3ccc(F)c(Br)c3)c2n1	7.58503	387.013	5	2	3.7945	TRUE
CHEMBL392273	27	nM	Fc1cccc(Cn2ncc3cc(Nc4ncnn5ccc(CN6CCCNCC6)c45)ccc32)c1	7.56864	470.234	8	2	3.8053	TRUE
CHEMBL3907533	27	nM	CCOc1cc2ncnc(Nc3ccc4c(cnn4Cc4ccccc4)c3)c2cc1NC(=O)/C=C/CN1CCOCC1	7.56864	563.264	9	2	4.997	TRUE
CHEMBL257816	27	nM	CO/N=C/c1c(N)ncnc1Nc1ccc2c(ccn2Cc2cccc(F)c2)c1	7.56864	390.16	7	2	3.9248	TRUE
CHEMBL572045	27.5	nM	CN1C[C@@H](OC(=O)N2CCCCCCC2)C[C@H](C(=O)NO)[C@H]1C(=O)N1CCN(c2ccccc2)CC1	7.56067	501.295	7	2	1.9322	TRUE
CHEMBL605976	27.8	nM	COc1cc2ncnc(N[C@H](C)c3ccccc3)c2cc1OCCCCCCC(=O)NO	7.55596	438.227	7	3	4.6462	TRUE
CHEMBL2048791	28	nM	O=C1Cc2cc(Oc3ccc(Nc4ncnc5ccn(CCO)c45)cc3Cl)ccc2N1	7.55284	435.11	7	3	4.1075	TRUE
CHEMBL495596	28	nM	O=C(NO)[C@H]1CC(CC(=O)N2CCCC2)CN[C@@H]1C(=O)N1CCN(c2ccccc2)CC1	7.55284	443.253	6	3	0.4474	TRUE
CHEMBL1204013	28	nM	Cl.O=C(NO)[C@H]1CC(OC(=O)N2CCCC2)CN[C@@H]1C(=O)N1CC[C@H](c2ccccc2)C1	7.55284	466.198	6	3	1.5088	TRUE
CHEMBL566350	28	nM	CCC1=C2C(Nc3ccc4c(cnn4Cc4ccccc4)c3)=NC=NC2N=C1NC(=O)OCCN1CCCCC1	7.55284	538.28	9	2	4.5938	TRUE
CHEMBL3133833	29	nM	Oc1cccc(Nc2ccnc3[nH]c4ccc(Br)cc4c23)c1	7.5376	353.016	3	3	4.9278	TRUE
CHEMBL1928947	29	nM	C=CC(=O)Nc1cccc(Oc2cc(Nc3ccc(OCc4cccc(F)c4)c(Cl)c3)ncn2)c1	7.5376	490.121	6	2	6.5085	TRUE
CHEMBL1923008	29	nM	OCCn1ccc2ncnc(Nc3ccc(Oc4cccc(OC(F)(F)F)c4)c(Cl)c3)c21	7.5376	464.086	7	2	5.5115	TRUE
CHEMBL4763834	29	nM	C=CC(=O)Nc1cccc(-c2c[nH]c3ncnc(Nc4ccc(Cc5ccccc5)cc4)c23)c1	7.5376	445.19	4	3	6.0838	TRUE
CHEMBL584960	29	nM	CN(C(=O)c1ccccc1)C1CN[C@H](C(=O)N2CC[C@H](c3ccccc3)C2)[C@@H](C(=O)NO)C1	7.5376	450.227	5	3	1.6268	TRUE
CHEMBL584714	29	nM	CCC1=C2C(Nc3ccc4c(cnn4Cc4ccccc4)c3)=NC=NC2N=C1NC(=O)OCC1CCCNC1	7.5376	524.265	9	3	4.1075	TRUE
CHEMBL2348414	29	nM	O=C(NCCO)C1=Cc2c(ncnc2Nc2ccc(Oc3cccc(C(F)(F)F)c3)c(Cl)c2)NCC1	7.5376	519.129	7	4	4.9922	TRUE
CHEMBL566559	30	nM	CCC1=C2C(Nc3ccc4c(cnn4Cc4ccccc4)c3)=NC=NC2N=C1NC(=O)OCC1CCCCN1	7.52288	524.265	9	3	4.25	TRUE
CHEMBL504117	30	nM	O=C(O[C@H]1CN[C@H](C#Cc2cc3ncnc(Nc4ccc(OCc5ccccn5)c(Cl)c4)c3s2)C1)N1CCOCC1	7.52288	590.15	10	2	4.6131	TRUE
CHEMBL429760	30	nM	Cc1ccc(Oc2ccc(Nc3ncnc4cccc(O[C@@H](C)C(=O)N(C)C)c34)cc2C)cn1	7.52288	457.211	7	1	5.03304	TRUE
CHEMBL3233785	30	nM	O=C(/C=C/CN1CC2CCC1C(=O)C2)Nc1cc2c(Nc3ccc(F)c(Cl)c3)ncnc2s1	7.52288	485.109	7	2	4.7755	TRUE
CHEMBL193681	30	nM	CCc1c(C(=O)NCCCn2ccnc2)cn2ncnc(Nc3ccc4c(cnn4Cc4ccccc4)c3)c12	7.52288	519.25	9	2	4.4499	TRUE
CHEMBL1922905	30	nM	FC(F)(F)c1cccc(Oc2ccc(Nc3ncnc4cc[nH]c34)cc2Cl)c1	7.52288	404.065	4	2	6.166	TRUE
CHEMBL510845	30	nM	O=C(O[C@H]1CN[C@H](C#Cc2cc3ncnc(Nc4ccc5c(cnn5Cc5cccc(F)c5)c4)c3s2)C1)N1CCOCC1	7.52288	597.196	10	2	4.5228	TRUE
CHEMBL5189852	30	nM	FC(F)(F)c1ccc(/C=C/c2nc(CNc3ccc(Br)cc3)co2)cc1	7.52288	422.024	3	1	6.2384	TRUE
CHEMBL3409482	30	nM	CN(CCO)c1cc2c(Nc3ccc4c(cnn4Cc4ccccc4)c3)ncnc2cn1	7.52288	425.196	8	2	3.5949	TRUE
CHEMBL228925	30	nM	CNc1cc2c(Nc3ccc(Oc4ccc(C(=O)NCC(C)(C)C)cc4)c(C)c3)ncnc2cn1	7.52288	470.243	7	3	5.68672	TRUE
CHEMBL585304	30	nM	O=C(NO)[C@H]1C[C@@H](OC(=O)N2CCCC2)CN[C@@H]1C(=O)N1CC=C(c2ccccc2)CC1	7.52288	442.222	6	3	1.3868	TRUE
CHEMBL255656	30	nM	CO/N=C/c1c(N)ncnc1Nc1ccc2c(cnn2Cc2cccc(Cl)c2)c1	7.52288	407.126	8	2	3.8341	TRUE
CHEMBL258313	31	nM	C[C@@H](Oc1cccc2ncnc(Nc3ccc(OCc4ccccn4)c(Cl)c3)c12)C(=O)N(C)CCO	7.50864	507.167	8	2	4.2188	TRUE
CHEMBL109480	31	nM	C=CCNC1=C2C[C@@H](C)C[C@H](OC)[C@H](O)[C@@H](C)/C=C(\C)[C@H](OC(N)=O)[C@@H](OC)/C=C\C=C(/C)C(=O)NC(=CC1=O)C2=O	7.50864	585.305	9	4	2.5376	TRUE
CHEMBL567940	31	nM	CN(C)C(=O)O[C@H]1C[C@H](C(=O)NO)[C@@H](C(=O)N2CCN(c3ccccc3)CC2)N(C)C1	7.50864	433.233	7	2	0.2277	TRUE
CHEMBL247104	31	nM	OCCNC1CCN(Cc2ccn3ncnc(Nc4ccc5c(cnn5Cc5cccc(F)c5)c4)c23)CC1	7.50864	514.26	9	3	3.5563	TRUE
CHEMBL3950549	32	nM	COc1cc2ncnc(Nc3ccc(F)c(Cl)c3)c2cc1NC(=O)/C=C/CN(C(C)C)C(C)C	7.49485	485.199	6	2	5.788	TRUE
CHEMBL247710	32	nM	NC1CCN(Cc2ccn3ncnc(Nc4ccc(OCc5cccc(F)c5)c(Cl)c4)c23)CC1	7.49485	480.184	7	2	4.7675	TRUE
CHEMBL504034	32	nM	CS(=O)(=O)CCNC(=O)O[C@H]1CN[C@H](C#Cc2cc3ncnc(Nc4ccc(OCc5cccc(F)c5)c(Cl)c4)c3s2)C1	7.49485	643.113	10	3	4.6592	TRUE
CHEMBL207410	32	nM	CNC(=O)c1cccc(C#Cc2cncnc2Nc2ccc(OCc3cccc(F)c3)c(Cl)c2)c1	7.49485	486.126	5	2	5.3511	TRUE
CHEMBL256363	32	nM	C[C@@H](Oc1cccc2ncnc(Nc3ccc4c(cnn4Cc4ccccn4)c3)c12)C(N)=O	7.49485	439.176	8	2	3.419	TRUE
CHEMBL3814846	32.3	nM	CC(=O)Nc1ccc2ncnc(Nc3ccc(OCc4cccc(F)c4)c(Cl)c3)c2c1	7.4908	436.11	5	2	5.7033	TRUE
CHEMBL3897363	33	nM	CN1CCN(c2ccc(Nc3ncnc4cc5oc(=O)n(CCOC(=O)CBr)c5cc34)cc2Cl)CC1	7.48149	574.073	10	1	3.6246	TRUE
CHEMBL91009	33	nM	COCC#CC(=O)Nc1ccc2ncnc(Nc3cccc(Br)c3)c2c1	7.48149	410.038	5	2	3.7242	TRUE
CHEMBL1645475	34	nM	NC1CCN(Cc2ccn3ncnc(Nc4cc(Cl)cc(Cl)c4)c23)CC1	7.46852	390.113	6	2	3.7028	TRUE
CHEMBL428777	34	nM	C[C@@H](Oc1cccc2ncnc(Nc3ccc(OCc4ccccn4)c(Cl)c3)c12)C(=O)N(C)C	7.46852	477.157	7	1	4.8563	TRUE
CHEMBL247915	34	nM	NC1CCN(Cc2ccn3ncnc(Nc4ccc5c(cnn5Cc5cccnc5)c4)c23)CC1	7.46852	453.239	9	2	3.189	TRUE
CHEMBL500072	35	nM	O=C(O[C@H]1CN[C@H](C#Cc2cc3ncnc(Nc4ccc5c(cnn5Cc5cc(F)ccc5F)c4)c3s2)C1)N1CCOCC1	7.45593	615.186	10	2	4.6619	TRUE
CHEMBL3982289	35	nM	O=C(CCl)OCCn1c(=O)oc2cc3ncnc(Nc4ccc(N5CCOCC5)c(Cl)c4)c3cc21	7.45593	517.092	10	1	3.5533	TRUE
CHEMBL430407	35	nM	Cc1ccc(Oc2ccc(Nc3ncnc4cccc(O[C@@H](C)C(=O)N5CCOCC5)c34)cc2C)cn1	7.45593	499.222	8	1	4.80364	TRUE
CHEMBL247914	35	nM	NC1CCN(Cc2ccn3ncnc(Nc4ccc5c(cnn5Cc5ccccn5)c4)c23)CC1	7.45593	453.239	9	2	3.189	TRUE
CHEMBL3958006	35	nM	O=C(/C=C/CN1CCOCC1)Nc1cc2c(Nc3ccc(F)c(Cl)c3)ncnc2cn1	7.45593	442.132	7	2	3.3878	TRUE
CHEMBL391387	36	nM	NC1CCN(Cc2ccn3ncnc(Nc4ccc(OCc5cccnc5)c(Cl)c4)c23)CC1	7.4437	463.189	8	2	4.0234	TRUE
CHEMBL205966	36	nM	Nc1ccc(C#Cc2cncnc2Nc2ccc(OCc3cccc(F)c3)c(Cl)c2)cc1	7.4437	444.115	5	2	5.5737	TRUE
CHEMBL4473365	37	nM	C=CC(=O)Nc1cc(Nc2ncc(Cl)c(Nc3ccccc3S(=O)(=O)C(C)C)n2)c(OC)cc1N(C)CCN(C)C	7.4318	601.224	10	3	4.9302	TRUE
CHEMBL578044	37	nM	CCC1=C2C(Nc3ccc4c(cnn4Cc4ccccc4)c3)=NC=NC2N=C1NC(=O)OCCC1CCNCC1	7.4318	538.28	9	3	4.4976	TRUE
CHEMBL328704	38	nM	CCN(CC)CC#CC(=O)Nc1ccc2ncnc(Nc3cccc(Br)c3)c2c1	7.42022	451.101	5	2	4.4196	TRUE
CHEMBL206003	38	nM	NCc1cccc(C#Cc2cncnc2Nc2ccc(OCc3cccc(F)c3)c(Cl)c2)n1	7.42022	459.126	6	2	4.8452	TRUE
CHEMBL391778	38	nM	NCC1CCN(Cc2ccn3ncnc(Nc4ccc5c(cnn5Cc5cccc(F)c5)c4)c23)CC1	7.42022	484.25	8	2	4.1807	TRUE
CHEMBL598164	38.2	nM	C#Cc1cccc(Nc2ncnc3cc(OC)c(OCCCCCC(=O)NO)cc23)c1	7.41794	420.18	7	3	3.8079	TRUE
CHEMBL599398	38.4	nM	C#Cc1cccc(Nc2ncnc3cc(OC)c(OCCCCC(=O)NO)cc23)c1	7.41567	406.164	7	3	3.4178	TRUE
CHEMBL234580	39	nM	O=C1CNCCN(Cc2ccn3ncnc(Nc4ccc5c(cnn5Cc5cccc(F)c5)c4)c23)C1	7.40894	484.214	9	2	2.9843	TRUE
CHEMBL456758	39	nM	COC[C@@H]1CCCN1/N=C/c1c(N)ncnc1Nc1ccc2c(cnn2Cc2cccc(F)c2)c1	7.40894	474.229	9	2	3.7842	TRUE
CHEMBL4474073	39.26	nM	COCCCOc1cc2ncnc(Nc3ccc(F)c(Cl)c3)c2cc1NC(=O)/C=C/CN(C)C	7.40605	487.179	7	2	4.6375	TRUE
CHEMBL412367	40	nM	CCc1c(NC(=O)OCCn2ccnc2)cn2ncnc(Nc3ccc4c(cnn4Cc4ccccc4)c3)c12	7.39794	521.229	10	2	4.8785	TRUE
CHEMBL500115	40	nM	CS(=O)(=O)O[C@H]1CN[C@H](C#Cc2cc3ncnc(Nc4ccc(OCc5cccc(F)c5)c(Cl)c4)c3s2)C1	7.39794	572.076	9	2	4.8646	TRUE
CHEMBL3233767	40	nM	C=CC(=O)Nc1cc2c(Nc3ccc(F)c(Cl)c3)ncnc2s1	7.39794	348.025	5	2	4.3519	TRUE
CHEMBL196438	40	nM	CCc1c(C(=O)O)cn2ncnc(Nc3ccc4c(cnn4Cc4ccccc4)c3)c12	7.39794	412.165	7	2	4.1315	TRUE
CHEMBL1922998	41	nM	FC(F)(F)Oc1cccc(Oc2ccc(Nc3ncnc4cc[nH]c34)cc2Cl)c1	7.38722	420.06	5	2	6.0458	TRUE
CHEMBL245278	41	nM	C[C@H](c1cccc(F)c1)n1ncc2cc(Nc3ncnn4ccc(COC[C@@H]5CNCCO5)c34)ccc21	7.38722	501.229	9	2	4.076	TRUE
CHEMBL4755977	41	nM	COc1cc2nccc(Oc3ccc(C(=O)Nc4ccccn4)cc3)c2cc1NC(=O)C#CCCN1CCOCC1	7.38722	551.217	8	2	4.3472	TRUE
CHEMBL247709	41	nM	Fc1cccc(COc2ccc(Nc3ncnn4ccc(CN5CCCNCC5)c34)cc2Cl)c1	7.38722	480.184	7	2	4.6397	TRUE
CHEMBL584120	42	nM	O=C(NO)[C@H]1C[C@H](OC(=O)N2CCCC2)CN[C@@H]1C(=O)N1CCC(c2ccccc2)CC1	7.37675	444.237	6	3	1.4771	TRUE
CHEMBL571040	42	nM	C=CC(=O)N1CCC[C@H]1C(=O)Nc1cc2c(Nc3cccc(Cl)c3F)ncnc2cc1OCCOC	7.37675	513.158	7	2	4.3066	TRUE
CHEMBL256295	42	nM	Nc1ncnc(Nc2ccc3c(cnn3Cc3cccc(F)c3)c2)c1/C=N/O	7.37675	377.14	8	3	3.1476	TRUE
CHEMBL5281270	42	nM	CCc1cccc(NC(=O)CSc2nc3cc4ccccc4cc3c(=O)n2-c2ccc(S(N)(=O)=O)cc2)c1	7.37675	544.124	7	2	4.4795	TRUE
CHEMBL4473875	42.11	nM	CCOCCOc1cc2ncnc(Nc3ccc(F)c(Cl)c3)c2cc1NC(=O)/C=C/CN(C)C	7.37561	487.179	7	2	4.6375	TRUE
CHEMBL257411	43	nM	C[C@@H](Oc1cccc2ncnc(Nc3ccc4c(cnn4Cc4nccs4)c3)c12)C(=O)N1CCOCC1	7.36653	515.174	10	1	3.854	TRUE
CHEMBL393264	43	nM	CC1(N)CCN(Cc2ccn3ncnc(Nc4ccc5c(cnn5Cc5cccc(F)c5)c4)c23)CC1	7.36653	484.25	8	2	4.3232	TRUE
CHEMBL255968	43	nM	C[C@H](Oc1cccc2ncnc(Nc3ccc(OCc4ccccn4)c(Cl)c3)c12)C(=O)N(C)C	7.36653	477.157	7	1	4.8563	TRUE
CHEMBL391181	43	nM	COc1cn2ncnc(Nc3ccc4c(cnn4Cc4cccc(F)c4)c3)c2c1CN1CCC(N)CC1	7.36653	500.245	9	2	3.9417	TRUE
CHEMBL506414	43	nM	Fc1cccc(COc2ccc(Nc3ncnc4sc(-c5cccs5)cc34)cc2Cl)c1	7.36653	467.033	6	1	7.5349	TRUE
CHEMBL604094	43.5	nM	O=C(CCCCCCOc1ccc2ncnc(Nc3ccc(F)c(Cl)c3)c2c1)NO	7.36151	432.136	6	3	5.0006	TRUE
CHEMBL255865	44	nM	CO/N=C/c1c(N)ncnc1Nc1ccc2c(cnn2Cc2cccc(C#N)c2)c1	7.35655	398.16	9	2	3.05238	TRUE
CHEMBL566337	44	nM	CCC1=C2C(Nc3ccc4c(cnn4Cc4ccccc4)c3)=NC=NC2N=C1NC(=O)OCCn1ccnc1	7.35655	521.229	10	2	4.0046	TRUE
CHEMBL205235	44	nM	Nc1cccc(C#Cc2cncnc2Nc2ccc(OCc3cccc(F)c3)c(Cl)c2)c1	7.35655	444.115	5	2	5.5737	TRUE
CHEMBL455208	44	nM	COc1ccccc1Cc1nc2ccc(-c3nn([C@H]4CC[C@H](N5CCNCC5)CC4)c4ncnc(N)c34)cc2[nH]1	7.35655	537.296	9	3	3.9401	TRUE
CHEMBL584334	44.5	nM	CN1C[C@@H](OC(=O)N2CCC2)C[C@H](C(=O)NO)[C@H]1C(=O)N1CCN(c2ccccc2)CC1	7.35164	445.233	7	2	0.3718	TRUE
CHEMBL2105719	46	nM	COc1cc2ncnc(Nc3ccc(F)c(Cl)c3)c2cc1NC(=O)/C=C/CN1CCCCC1.O	7.33724	487.179	6	2	4.3304	TRUE
CHEMBL373207	46	nM	CCN(CC)CC#CC(=O)Nc1ccc2ncnc(Nc3ccc(F)c(Cl)c3)c2c1	7.33724	425.142	5	2	4.4496	TRUE
CHEMBL2110732	46	nM	COc1cc2ncnc(Nc3ccc(F)c(Cl)c3)c2cc1NC(=O)/C=C/CN1CCCCC1	7.33724	469.168	6	2	5.1551	TRUE
CHEMBL391321	47	nM	OCCNCc1ccn2ncnc(Nc3ccc4c(cnn4Cc4cccc(F)c4)c3)c12	7.3279	431.187	8	3	3.0919	TRUE
CHEMBL204467	47	nM	OCc1ccc(C#Cc2cncnc2Nc2ccc(OCc3cccc(F)c3)c(Cl)c2)o1	7.3279	449.094	6	2	5.0768	TRUE
CHEMBL228926	48	nM	Cc1cc(Nc2ncnc3cnc(N(C)C)cc23)ccc1Oc1ccc(C(=O)NCC(C)(C)C)cc1	7.31876	484.259	7	2	5.71102	TRUE
CHEMBL3896067	50	nM	COc1cc2c(Nc3ccc(Br)c(Cl)c3)ncnc2cc1O[C@H]1CO[C@H]2[C@@H]1OC[C@@H]2S(C)(=O)=O	7.30103	569.002	9	1	3.7561	TRUE
CHEMBL3910031	50	nM	COc1cc2c(Nc3ccc(Br)c(Cl)c3)ncnc2cc1O[C@H]1CO[C@H]2[C@@H]1OC[C@@H]2OC	7.30103	521.035	8	1	4.3579	TRUE
CHEMBL3907230	50	nM	CCO[C@H]1CO[C@H]2[C@@H]1OC[C@@H]2Oc1cc2ncnc(Nc3ccc(Br)c(Cl)c3)c2cc1OC	7.30103	535.051	8	1	4.748	TRUE
CHEMBL3921689	50	nM	COc1cc2c(Nc3ccc(Br)c(Cl)c3)ncnc2cc1O[C@H]1CO[C@H]2[C@@H]1OC[C@@H]2OC(F)F	7.30103	557.016	8	1	4.9507	TRUE
CHEMBL3922278	50	nM	COc1cc2c(Nc3ccc(F)c(Cl)c3F)ncnc2cc1OC[C@@H]1CN2CCC[C@H]2CO1	7.30103	476.143	7	1	4.5556	TRUE
CHEMBL3932115	50	nM	COc1cc2c(Nc3ccc(Br)c(Cl)c3)ncnc2cc1O[C@H]1CO[C@@H]2CCO[C@H]12	7.30103	491.025	7	1	4.733	TRUE
CHEMBL3945353	50	nM	COc1cc2c(Nc3ccc(Cl)c(Cl)c3)ncnc2cc1OCc1nc2c(s1)CNCC2	7.30103	487.064	8	2	5.37	TRUE
CHEMBL3928696	50	nM	COc1cc2c(Nc3ccc(Cl)c(Cl)c3)ncnc2cc1OCC1CC1	7.30103	389.07	5	1	5.4776	TRUE
CHEMBL3945028	50	nM	COc1cc2c(Nc3ccc(Br)c(Cl)c3)ncnc2cc1O[C@@H]1CO[C@H]2[C@@H]1OC[C@@H]2O	7.30103	507.02	8	2	3.7038	TRUE
CHEMBL3919145	50	nM	COc1cc2c(Nc3ccc(Cl)c(Cl)c3)ncnc2cc1O[C@@H]1C[C@H]2OC[C@H](OC)[C@H]2O1	7.30103	477.086	8	1	4.5964	TRUE
CHEMBL275762	50	nM	O=C(CCl)Nc1ccc2ncnc(Nc3cc(Cl)c(Cl)cc3F)c2c1	7.30103	397.99	4	2	4.9966	TRUE
CHEMBL190094	50	nM	CN(C)C/C=C/C(=O)Nc1ccc2ncnc(Nc3cc(Cl)c(Cl)cc3F)c2c1	7.30103	433.087	5	2	4.8756	TRUE
CHEMBL3949434	50	nM	COc1cc2c(Nc3ccc(Cl)c(Cl)c3)ncnc2cc1OC[C@@H]1O[C@@H](OC)[C@@H](O)[C@H](O)[C@H]1O	7.30103	511.091	10	4	2.5216	TRUE
CHEMBL3964605	50	nM	COc1cc2c(Nc3ccc(Br)c(Cl)c3)ncnc2cc1O[C@@H]1C[C@H]2OCC3(OCCO3)[C@H]2O1	7.30103	549.03	9	1	4.4336	TRUE
CHEMBL3964556	50	nM	COc1cc2c(Nc3ccc(Cl)c(Cl)c3)ncnc2cc1O[C@H]1CO[C@H]2[C@@H]1OC[C@@H]2OC	7.30103	477.086	8	1	4.2488	TRUE
CHEMBL3936151	50	nM	CCN1CCOC(COc2cc3ncnc(Nc4ccc(Cl)c(Cl)c4)c3cc2OC)C1	7.30103	462.123	7	1	4.7883	TRUE
CHEMBL3893363	50	nM	COc1cc2c(Nc3ccc(Br)c(Cl)c3)ncnc2cc1O[C@H]1CO[C@H]2[C@@H]1OC[C@@H]2O	7.30103	507.02	8	2	3.7038	TRUE
CHEMBL3935851	50	nM	COc1cc2c(Nc3ccc(Br)c(Cl)c3F)ncnc2cc1OC[C@@H]1CN(C)CC(=O)N1	7.30103	523.042	7	2	3.746	TRUE
CHEMBL3983938	50	nM	CCN1CCCOC(COc2cc3ncnc(Nc4ccc(Cl)c(Cl)c4)c3cc2OC)C1	7.30103	476.138	7	1	5.1784	TRUE
CHEMBL3928883	50	nM	COc1cc2c(Nc3ccc(Cl)c(Cl)c3)ncnc2cc1OC[C@@H]1CN2CCC[C@H]2CO1	7.30103	474.123	7	1	4.9308	TRUE
CHEMBL3914599	50	nM	CCCN1CCCOC(COc2cc3ncnc(Nc4ccc(Cl)c(Cl)c4)c3cc2OC)C1	7.30103	490.154	7	1	5.5685	TRUE
CHEMBL3944791	50	nM	COc1cc2c(Nc3ccc(Cl)c(Cl)c3Cl)ncnc2cc1OCC1CN(C)CCO1	7.30103	482.068	7	1	5.0516	TRUE
CHEMBL3961005	50	nM	COc1cc2c(Nc3ccc(Br)c(Cl)c3F)ncnc2cc1O[C@@H]1C[C@H]2OC[C@H](OC)[C@H]2O1	7.30103	539.026	8	1	4.8446	TRUE
CHEMBL3919051	50	nM	CCCCN1CCOC(COc2cc3ncnc(Nc4ccc(Cl)c(Cl)c4)c3cc2OC)C1	7.30103	490.154	7	1	5.5685	TRUE
CHEMBL3916225	50	nM	COc1cc2c(Nc3ccc(C)c(Br)c3)ncnc2cc1OCC1CN(C)CCO1	7.30103	472.111	7	1	4.16232	TRUE
CHEMBL3946242	50	nM	COc1cc2c(Nc3ccc(F)c(Cl)c3F)ncnc2cc1OC[C@@H]1CN2CCOC[C@H]2CO1	7.30103	492.138	8	1	3.792	TRUE
CHEMBL3908311	50	nM	COc1cc2c(Nc3cc(Cl)c(Cl)cc3F)ncnc2cc1OC[C@@H]1CN2CCOC[C@H]2CO1	7.30103	508.108	8	1	4.3063	TRUE
CHEMBL3986404	50	nM	COc1cc2c(Nc3ccc(Cl)c(Cl)c3F)ncnc2cc1O[C@@H]1C[C@H]2OC[C@H](OC)[C@H]2O1	7.30103	495.076	8	1	4.7355	TRUE
CHEMBL3906715	50	nM	COc1cc2c(Nc3cc(Cl)c(Cl)c(Cl)c3)ncnc2cc1OCC1CN(C)CCO1	7.30103	482.068	7	1	5.0516	TRUE
CHEMBL3920036	50	nM	COc1cc2c(Nc3ccc(Cl)c(Cl)c3)ncnc2cc1OC1C[C@@H]2CN(C)C[C@@H]2C1	7.30103	458.128	6	1	5.4078	TRUE
CHEMBL3968233	50	nM	COc1cc2c(Nc3cc(Cl)c(Cl)cc3F)ncnc2cc1OCC1CN(C)CCO1	7.30103	466.097	7	1	4.5373	TRUE
CHEMBL3895129	50	nM	COc1cc2c(Nc3ccc(F)c(Cl)c3F)ncnc2cc1OCC1CN(C)C(C)(C)CO1	7.30103	478.158	7	1	4.8016	TRUE
CHEMBL3971781	50	nM	COc1cc2c(Nc3ccc(Cl)c(Cl)c3F)ncnc2cc1OC[C@H]1CN2CCOC[C@H]2CO1	7.30103	508.108	8	1	4.3063	TRUE
CHEMBL3924147	50	nM	COc1cc2c(Nc3cc(Cl)c(Br)cc3F)ncnc2cc1OC[C@@H]1CN2CCOC[C@H]2CO1	7.30103	552.058	8	1	4.4154	TRUE
CHEMBL3958721	50	nM	COc1cc2c(Nc3ccc(Br)c(Cl)c3)ncnc2cc1O[C@@H]1CO[C@H]2[C@@H]1OC[C@@H]2NC(F)(F)F	7.30103	574.023	8	2	4.8209	TRUE
CHEMBL3931427	50	nM	COc1cc2c(Nc3cc(Cl)c(Cl)cc3F)ncnc2cc1OC[C@@H]1CO[C@H]2[C@@H]1OC[C@@H]2OC	7.30103	509.092	8	1	4.6355	TRUE
CHEMBL4776708	50	nM	C=CC(=O)Nc1cccc(-c2c(-c3ccc(N4CCN(C)CC4)cc3)[nH]c3ncnc(OC)c23)c1	7.30103	468.227	6	2	4.1768	TRUE
CHEMBL3945177	50	nM	COc1cc2c(Nc3ccc(Br)c(Cl)c3)ncnc2cc1OCC1CN(C)CCO1	7.30103	492.056	7	1	4.5073	TRUE
CHEMBL3934095	50	nM	COc1cc2c(Nc3ccc(Br)c(C)c3)ncnc2cc1OCC1CN(C)CCO1	7.30103	472.111	7	1	4.16232	TRUE
CHEMBL3914189	50	nM	COc1cc2c(Nc3ccc(Cl)c(Cl)c3)ncnc2cc1OCC1CNCC(C)(C)O1	7.30103	462.123	7	2	4.8346	TRUE
CHEMBL3893416	50	nM	COc1cc2c(Nc3ccc(Cl)c(Cl)c3)ncnc2cc1OC[C@@H]1CO[C@H]2[C@@H]1OC[C@@H]2OC	7.30103	491.101	8	1	4.4964	TRUE
CHEMBL3943734	50	nM	COc1cc2c(Nc3ccc(Br)c(Cl)c3)ncnc2cc1O[C@@H]1CO[C@H]2[C@@H]1OC[C@@H]2NS(C)(=O)=O	7.30103	584.013	9	2	3.2607	TRUE
CHEMBL3928601	50	nM	COc1cc2c(Nc3ccc(Cl)c(Cl)c3)ncnc2cc1OCC1CN(C)CC(C)(C)O1	7.30103	476.138	7	1	5.1768	TRUE
CHEMBL3933130	50	nM	COc1cc2c(Nc3ccc(Cl)c(Cl)c3F)ncnc2cc1OC[C@@H]1CN(C)CC(=O)N1	7.30103	479.093	7	2	3.6369	TRUE
CHEMBL3959774	50	nM	COc1cc2c(Nc3ccc(Cl)c(Cl)c3F)ncnc2cc1OC[C@@H]1CN2CCC[C@H]2CO1	7.30103	492.113	7	1	5.0699	TRUE
CHEMBL3896122	50	nM	COc1cc2c(Nc3cc(Cl)c(Cl)cc3F)ncnc2cc1OC[C@@H]1CN2CCC[C@H]2CO1	7.30103	492.113	7	1	5.0699	TRUE
CHEMBL3955359	50	nM	COc1cc2c(Nc3cccc(Cl)c3F)ncnc2cc1O[C@H]1CO[C@H]2[C@@H]1OC[C@@H]2OC	7.30103	461.115	8	1	3.7345	TRUE
CHEMBL3977450	50	nM	COc1cc2c(Nc3cc(Cl)c(Cl)cc3F)ncnc2cc1OC[C@H]1CN2CCOC[C@H]2CO1	7.30103	508.108	8	1	4.3063	TRUE
CHEMBL507821	50	nM	O=C(O[C@H]1CN[C@H](C#Cc2cc3ncnc(Nc4ccc5c(cnn5Cc5ccccc5)c4)c3s2)C1)N1CCOCC1	7.30103	579.205	10	2	4.3837	TRUE
CHEMBL3914441	50	nM	COc1cc2c(Nc3ccc(Br)c(Cl)c3F)ncnc2cc1OC[C@H]1CN2CCOC[C@H]2CO1	7.30103	552.058	8	1	4.4154	TRUE
CHEMBL3923692	50	nM	COc1cc2c(Nc3ccc(Cl)c(Cl)c3)ncnc2cc1OCC1CN(S(=O)(=O)CCCCl)CCO1	7.30103	574.061	8	1	4.7271	TRUE
CHEMBL3917220	50	nM	COc1cc2c(Nc3ccc(Cl)c(Cl)c3)ncnc2cc1OC[C@H]1CN2CCC[C@@H]2CO1	7.30103	474.123	7	1	4.9308	TRUE
CHEMBL3955083	50	nM	COc1cc2c(Nc3cc(F)c(Br)c(F)c3)ncnc2cc1OCC1CN(C)CCO1	7.30103	494.077	7	1	4.1321	TRUE
CHEMBL3939133	50	nM	COc1cc2c(Nc3ccc(Cl)c(Cl)c3)ncnc2cc1OCCC1CN(C)CC(C)(C)O1	7.30103	490.154	7	1	5.5669	TRUE
CHEMBL3941947	50	nM	COc1cc2c(Nc3ccc(Br)c(F)c3F)ncnc2cc1OCC1CN(C)CCO1	7.30103	494.077	7	1	4.1321	TRUE
CHEMBL3952465	50	nM	COc1cc2c(Nc3cc(F)c(Br)cc3F)ncnc2cc1OCC1CN(C)CCO1	7.30103	494.077	7	1	4.1321	TRUE
CHEMBL3959516	50	nM	COc1cc2c(Nc3cc(Cl)c(Br)cc3F)ncnc2cc1OC[C@H]1CN2CCOC[C@H]2CO1	7.30103	552.058	8	1	4.4154	TRUE
CHEMBL3937048	50	nM	COc1cc2c(Nc3cccc(Cl)c3F)ncnc2cc1O[C@H]1CO[C@H]2[C@@H]1OC[C@@H]2F	7.30103	449.095	7	1	4.0576	TRUE
CHEMBL3939828	50	nM	COc1cc2c(Nc3ccc(Br)c(Cl)c3)ncnc2cc1O[C@@H]1CCOC1	7.30103	449.014	6	1	4.9656	TRUE
CHEMBL3924098	50	nM	COc1cc2c(Nc3ccc(Br)c(Cl)c3C)ncnc2cc1OCC1CN(C)CCO1	7.30103	506.072	7	1	4.81572	TRUE
CHEMBL3917294	50	nM	COc1cc2c(Nc3ccc(Cl)c(Cl)c3)ncnc2cc1OCC1CN2CSC[C@H]2CO1	7.30103	492.079	8	1	4.8413	TRUE
CHEMBL3958898	50	nM	COc1cc2c(Nc3cc(Cl)c(Br)cc3F)ncnc2cc1OCC1COCCN1C	7.30103	510.047	7	1	4.6464	TRUE
CHEMBL3947712	50	nM	COc1cc2c(Nc3ccc(Cl)c(Cl)c3F)ncnc2cc1OC[C@@H]1CN2CCC[C@H]2C(=O)N1	7.30103	505.108	7	2	4.1695	TRUE
CHEMBL3893846	50	nM	COc1cc2c(Nc3ccc(Cl)c(Cl)c3)ncnc2cc1OCC1CN(C)C(C)(C)C(=O)O1	7.30103	490.117	8	1	4.7034	TRUE
CHEMBL3959495	50	nM	COc1cc2c(Nc3ccc(Cl)c(Cl)c3)ncnc2cc1OCCC1CN(C)C(C)(C)CO1	7.30103	490.154	7	1	5.5669	TRUE
CHEMBL3916828	50	nM	COc1cc2c(N[C@H]3COC[C@@H]3OC)ncnc2cc1O[C@H]1CO[C@H]2[C@@H]1OC[C@@H]2O	7.30103	419.169	10	2	0.37	TRUE
CHEMBL3962203	50	nM	COc1cc2c(Nc3ccc(Cl)c(Cl)c3)ncnc2cc1OCCC1CNC(C)(C)CO1	7.30103	476.138	7	2	5.2247	TRUE
CHEMBL3956820	50	nM	COc1cc2c(Nc3ccc(F)c(Cl)c3F)ncnc2cc1OC[C@H]1CN2CCOC[C@H]2CO1	7.30103	492.138	8	1	3.792	TRUE
CHEMBL569389	50.5	nM	CN1C[C@@H](OC(=O)N2CCC(F)(F)C2)C[C@H](C(=O)NO)[C@H]1C(=O)N1CCN(c2ccccc2)CC1	7.29671	495.229	7	2	1.0071	TRUE
CHEMBL256576	51	nM	C[C@@H](Oc1cccc2ncnc(Nc3ccc4c(cnn4Cc4ccccn4)c3)c12)C(=O)N1CCOCC1	7.29243	509.218	9	1	3.7925	TRUE
CHEMBL231100	51	nM	Cc1cc(Nc2ncnc3cnc(N(C)C)cc23)ccc1OC1CCN(C(=O)CC(C)(C)C)CC1	7.29243	476.29	7	1	4.94882	TRUE
CHEMBL598611	51.6	nM	C#Cc1cccc(Nc2ncnc3cc(OCCCCCCC(=O)NO)c(OC)cc23)c1	7.28735	434.195	7	3	4.198	TRUE
CHEMBL567939	52	nM	CC(C)C(=O)N(C)C1CN[C@H](C(=O)N2CC[C@H](c3ccccc3)C2)[C@@H](C(=O)NO)C1	7.284	416.242	5	3	0.969	TRUE
CHEMBL246687	52	nM	N[C@H]1CCN(Cc2ccn3ncnc(Nc4ccc5c(cnn5Cc5cccc(F)c5)c4)c23)C1	7.284	456.219	8	2	3.543	TRUE
CHEMBL221857	52	nM	O=C(NO)[C@H]1CC2(CC2)CN[C@@H]1C(=O)N1CCN(c2ccccc2)CC1	7.284	358.2	5	3	0.5989	TRUE
CHEMBL437584	53	nM	COc1ccccc1Cc1nc2ccc(-c3nn([C@H]4CC[C@H](N5CCOCC5)CC4)c4ncnc(N)c34)cc2[nH]1	7.27572	538.28	9	2	4.3671	TRUE
CHEMBL93386	53	nM	O=C(C#CCN1CCOCC1)Nc1ccc2ncnc(Nc3cccc(Br)c3)c2c1	7.27572	465.08	6	2	3.41	TRUE
CHEMBL391779	54	nM	CNC1CCN(Cc2ccn3ncnc(Nc4ccc5c(cnn5Cc5cccc(F)c5)c4)c23)CC1	7.26761	484.25	8	2	4.1938	TRUE
CHEMBL4437943	54	nM	O=C(CCSC(=S)N1CCN(c2ccccc2)CC1)Nc1cccc(NC(=O)c2ccccn2)c1	7.26761	505.161	6	2	4.5028	TRUE
CHEMBL443098	54	nM	COCCCN1CCN([C@H]2CC[C@H](n3nc(-c4ccc5nc(Cc6ccccc6OC)[nH]c5c4)c4c(N)ncnc43)CC2)CC1	7.26761	609.354	10	2	4.689	TRUE
CHEMBL495979	54	nM	Fc1cccc(COc2ccc(Nc3ncnc4cc(C#C[C@@H]5CCCN5)sc34)cc2Cl)c1	7.26761	478.103	6	2	5.9099	TRUE
CHEMBL246284	55	nM	Fc1cccc(Cn2ncc3cc(Nc4ncnn5ccc(COC[C@@H]6CNCCO6)c45)ccc32)c1	7.25964	487.213	9	2	3.515	TRUE
CHEMBL1922906	55	nM	FC(F)(F)Oc1ccccc1Oc1ccc(Nc2ncnc3cc[nH]c23)cc1Cl	7.25964	420.06	5	2	6.0458	TRUE
CHEMBL205045	55	nM	Fc1cccc(COc2ccc(Nc3ncncc3C#Cc3ccccn3)cc2Cl)c1	7.25964	430.1	5	1	5.3865	TRUE
CHEMBL371888	56	nM	COc1cc2ncnc(Nc3ccc(OCc4ccccn4)c(C)c3)c2cc1OC	7.25181	402.169	7	1	4.67302	TRUE
CHEMBL256994	57	nM	CNC(=O)[C@@H](C)Oc1cccc2ncnc(Nc3ccc4c(cnn4Cc4cccc(F)c4)c3)c12	7.24413	470.187	7	2	4.4238	TRUE
CHEMBL452717	59	nM	COc1ccccc1Cc1nc2ccc(-c3nn([C@H]4CC[C@H](N5CCN(C(C)=O)CC5)CC4)c4ncnc(N)c34)cc2[nH]1	7.22915	579.307	9	2	4.199	TRUE
CHEMBL205765	59	nM	CC(=O)Nc1cccc(C#Cc2cncnc2Nc2ccc(OCc3cccc(F)c3)c(Cl)c2)n1	7.22915	487.121	6	2	5.3449	TRUE
CHEMBL256364	59	nM	CNC(=O)[C@@H](C)Oc1cccc2ncnc(Nc3ccc4c(cnn4Cc4ccccn4)c3)c12	7.22915	453.191	8	2	3.6797	TRUE
CHEMBL455434	60	nM	O=C(O[C@H]1CN[C@H](C#Cc2cc3ncnc(Nc4ccc(Cc5ccccc5)cc4)c3s2)C1)N1CCOCC1	7.22185	539.199	8	2	4.5765	TRUE
CHEMBL245667	60	nM	NCCCOCc1ccn2ncnc(Nc3ccc4c(cnn4Cc4cccc(F)c4)c3)c12	7.22185	445.203	8	2	3.8754	TRUE
CHEMBL497026	60	nM	O=C(NO)[C@H]1CC(CC(=O)N2CCCCC2)CC[C@@H]1C(=O)N1CCN(c2ccccc2)CC1	7.22185	456.274	5	2	2.2757	TRUE
CHEMBL207869	60	nM	Fc1cccc(COc2ccc(Nc3ncncc3C#Cc3ncccn3)cc2Cl)c1	7.22185	431.095	6	1	4.7815	TRUE
CHEMBL2178352	60	nM	CN1CCN(c2ccc(Nc3ncc4nc(Nc5ccccc5)n(C5CCCC5)c4n3)cc2)CC1	7.22185	468.275	8	2	5.1804	TRUE
CHEMBL1923002	60	nM	Cc1ccc(Oc2ccc(Nc3ncnc4cc[nH]c34)cc2C)cn1	7.22185	331.143	5	2	4.50564	TRUE
CHEMBL500217	60	nM	O=C(O[C@H]1CN[C@H](C#Cc2cc3ncnc(Nc4ccc5c(ccn5Cc5ccccc5)c4)c3s2)C1)N1CCOCC1	7.22185	578.21	9	2	4.9887	TRUE
CHEMBL428046	60	nM	Fc1cccc(Cn2ncc3cc(Nc4ncnn5ccc(COC[C@H]6CNCCO6)c45)ccc32)c1	7.22185	487.213	9	2	3.515	TRUE
CHEMBL248115	60	nM	Cc1cncc(COc2ccc(Nc3ncnn4ccc(CN5CCC(N)CC5)c34)cc2Cl)c1	7.22185	477.204	8	2	4.33182	TRUE
CHEMBL453398	60	nM	O=C(O[C@H]1CN[C@H](C#Cc2cc3ncnc(Nc4ccc(Oc5ccccn5)c(Cl)c4)c3s2)C1)N1CCOCC1	7.22185	576.135	10	2	4.8264	TRUE
CHEMBL3948267	62	nM	O=C(/C=C/CN1CCCC1)Nc1cc2c(Nc3ccc4c(cnn4Cc4ccccc4)c3)ncnc2cn1	7.20761	504.239	8	2	4.7569	TRUE
CHEMBL3949347	62	nM	CN(C)C/C=C/C(=O)Nc1cc2c(Nc3ccc4c(cnn4Cc4ccccc4)c3)ncnc2cn1	7.20761	478.223	8	2	4.2227	TRUE
CHEMBL5180725	62.26	nM	Cc1cc(Nc2c(C#N)cnc3ccc(NC(=O)/C=C/CN(C)C)cc23)ccc1Oc1cc2nncn2cn1	7.20579	519.213	10	2	4.4448	TRUE
CHEMBL401443	63	nM	OC1CCN(Cc2ccn3ncnc(Nc4ccc5c(cnn5Cc5cccc(F)c5)c4)c23)CC1	7.20066	471.218	8	2	3.9667	TRUE
CHEMBL4437803	64	nM	O=C(Nc1cccc(NC(=O)c2ccccn2)c1)NC1CCCCC1	7.19382	338.174	3	3	3.7881	TRUE
CHEMBL205284	66	nM	Fc1cccc(COc2ccc(Nc3ncncc3C#Cc3cc[nH]n3)cc2Cl)c1	7.18046	419.095	5	2	4.7146	TRUE
CHEMBL403594	66	nM	CNC(=O)[C@@H](C)Oc1cccc2ncnc(Nc3ccc(OCc4ccccn4)c(Cl)c3)c12	7.18046	463.141	7	2	4.5141	TRUE
CHEMBL3218000	66	nM	C#Cc1cccc(Nc2ncnc3ccc(OCc4ccc(C(=O)Nc5ccccc5N)cc4)cc23)c1	7.18046	485.185	6	3	5.7682	TRUE
CHEMBL3133822	66	nM	Clc1cccc(Nc2ccnc3[nH]c4ccccc4c23)c1	7.18046	293.072	2	2	5.1131	TRUE
CHEMBL202421	67	nM	CCCCN(CC#CC(=O)Nc1cc2c(Nc3ccc(F)c(Cl)c3)ncnc2cn1)CCCC	7.17393	482.2	6	2	5.405	TRUE
CHEMBL496829	67	nM	CC(C)c1cccc(C2CCN(C(=O)[C@H]3CC[C@H](CC(=O)N4CCCCC4)C[C@@H]3C(=O)NO)CC2)c1	7.17393	497.325	4	2	4.4565	TRUE
CHEMBL380078	69	nM	CNC(=O)NCc1cccc(C#Cc2cncnc2Nc2ccc(OCc3cccc(F)c3)c(Cl)c2)n1	7.16115	516.148	6	3	4.8155	TRUE
CHEMBL257478	69	nM	Cc1ccc(Oc2ccc(Nc3ncnc4cccc(O[C@H](C)C(=O)N(C)CCO)c34)cc2C)cn1	7.16115	487.222	8	2	4.39554	TRUE
CHEMBL245869	70	nM	Fc1cccc(Cn2ncc3cc(Nc4ncnn5ccc(COC6CCNCC6)c45)ccc32)c1	7.1549	471.218	8	2	4.2786	TRUE
CHEMBL1683972	70	nM	Cc1ncnc(Nc2ccc(OCc3cccc(F)c3)c(Cl)c2)c1C#C/C=N/OCCN1CCOCC1	7.1549	523.179	8	1	4.58622	TRUE
CHEMBL586042	70	nM	O=C(NO)[C@H]1CC(OC(=O)N2CCCC2)CN[C@@H]1C(=O)N1Cc2ccccc2C1	7.1549	402.19	6	3	0.6133	TRUE
CHEMBL393848	70	nM	N[C@@H]1CCN(Cc2ccn3ncnc(Nc4ccc5c(cnn5Cc5cccc(F)c5)c4)c23)C1	7.1549	456.219	8	2	3.543	TRUE
CHEMBL194337	70	nM	CN1CCC(Oc2cccc3ncnc(Nc4ccc(OCc5ccccn5)cc4)c23)CC1	7.1549	441.216	7	1	4.8204	TRUE
CHEMBL1645477	70	nM	COc1ccc(Nc2ncnn3ccc(CN4CCC(N)CC4)c23)cc1Cl	7.1549	386.162	7	2	3.058	TRUE
CHEMBL1683968	71	nM	Cc1ncnc(Nc2ccc(OCc3cccc(F)c3)c(Cl)c2)c1/C=C(\F)C(=O)NCCS(C)(=O)=O	7.14874	536.11	7	2	4.37132	TRUE
CHEMBL598610	71.2	nM	COc1cc2c(Nc3ccc(F)c(Cl)c3)ncnc2cc1OCCCCCCC(=O)NO	7.14752	462.147	7	3	5.0092	TRUE
CHEMBL515664	72	nM	COC[C@H]1CCCN1/N=C/c1c(N)ncnc1Nc1ccc2c(cnn2Cc2cccc(F)c2)c1	7.14267	474.229	9	2	3.7842	TRUE
CHEMBL90595	73	nM	O=C(C#CCN1CCCCC1)Nc1ccc2ncnc(Nc3cccc(Br)c3)c2c1	7.13668	463.101	5	2	4.5637	TRUE
CHEMBL443523	73	nM	C=CC(=O)Nc1ccc2c(Nc3cccc(Br)c3)ncnc2c1	7.13668	368.027	4	2	4.2604	TRUE
CHEMBL398793	74	nM	CC1CNCCN(Cc2ccn3ncnc(Nc4ccc5c(cnn5Cc5cccc(F)c5)c4)c23)C1	7.13077	484.25	8	2	4.0513	TRUE
CHEMBL1683970	74	nM	Cc1ncnc(Nc2ccc(OCc3cccc(F)c3)c(Cl)c2)c1C#CCCN1CCOCC1	7.13077	480.173	6	1	4.97392	TRUE
CHEMBL3357634	75	nM	COc1cc2ncnc(Nc3ccc(F)c(Cl)c3)c2cc1NC(=O)/C(F)=C/CN(C)C	7.12494	447.127	6	2	4.528	TRUE
CHEMBL5208454	75.1	nM	O=C(CCCl)Nc1ccc2ncnc(Nc3ccc4[nH]cc(Br)c4c3)c2c1	7.12436	443.015	4	3	5.1846	TRUE
CHEMBL402316	76	nM	CO/N=C/c1c(N)ncnc1Nc1ccc2[nH]c(Cc3cccc(F)c3)nc2c1	7.11919	391.156	7	3	3.3889	TRUE
CHEMBL393787	76	nM	O[C@@H]1CNCCN(Cc2ccn3ncnc(Nc4ccc5c(cnn5Cc5cccc(F)c5)c4)c23)C1	7.11919	486.229	9	3	2.7761	TRUE
CHEMBL392664	76	nM	Fc1cccc(Cn2ncc3cc(Nc4ncnn5ccc(CNC6CCNCC6)c45)ccc32)c1	7.11919	470.234	8	3	3.8516	TRUE
CHEMBL598798	76.5	nM	C#Cc1cc(Nc2ncnc3cc(OC)c(OCCCCCCC(=O)NO)cc23)ccc1F	7.11634	452.186	7	3	4.3371	TRUE
CHEMBL3633774	77	nM	NC(=O)Nc1ccc2ncnc(Nc3ccc(Oc4cccc(C(F)(F)F)c4)c(Cl)c3)c2c1	7.11351	473.087	5	3	6.3285	TRUE
CHEMBL3912361	77	nM	O=C(CCl)OCCn1c(=O)oc2cc3ncnc(Nc4ccc(N5CCCCC5)c(Cl)c4)c3cc21	7.11351	515.113	9	1	4.707	TRUE
CHEMBL578255	77	nM	CCC1=C2C(Nc3ccc4c(cnn4Cc4ccccc4)c3)=NC=NC2N=C1NC(=O)OCCN1CCOCC1	7.11351	540.26	10	2	3.4401	TRUE
CHEMBL5173449	78	nM	COc1ccc(-c2c(CN3CCOCC3)nc3scc(C(=O)NN)n23)cc1	7.10791	387.137	8	2	1.5071	TRUE
CHEMBL1683965	78	nM	Cc1ncnc(Nc2ccc(OCc3cccc(F)c3)c(Cl)c2)c1/C=C(\F)C(=O)NCCN1CCOCC1	7.10791	543.185	7	2	4.65892	TRUE
CHEMBL430410	78	nM	Cc1ccc(Oc2ccc(Nc3ncnc4cccc(O[C@@H](C)C(=O)N(C)CCO)c34)cc2C)cn1	7.10791	487.222	8	2	4.39554	TRUE
CHEMBL256060	79	nM	C[C@H](Oc1cccc2ncnc(Nc3ccc(OCc4ccccn4)c(Cl)c3)c12)C(=O)N(C)CCO	7.10237	507.167	8	2	4.2188	TRUE
CHEMBL402657	80	nM	C[C@H](Oc1cccc2ncnc(Nc3ccc4c(cnn4Cc4ccccn4)c3)c12)C(=O)N(C)C	7.09691	467.207	8	1	4.0219	TRUE
CHEMBL472545	80	nM	Nc1ncnc(Nc2ccc(OCc3ccccc3)c(Cl)c2)c1-c1nnc(CCN2CCOCC2)o1	7.09691	507.179	10	2	3.9595	TRUE
CHEMBL1683963	81	nM	C/C(=C\c1c(C)ncnc1Nc1ccc(OCc2cccc(F)c2)c(Cl)c1)C(=O)NCCN1CCOCC1	7.09151	539.21	7	2	4.75182	TRUE
CHEMBL231875	81	nM	Fc1cccc(Cn2ncc3cc(Nc4ncnn5ccc(CN6CCNCC6)c45)ccc32)c1	7.09151	456.219	8	2	3.4152	TRUE
CHEMBL497697	84	nM	CN/N=C/c1c(N)ncnc1Nc1ccc2c(cnn2Cc2cccc(F)c2)c1	7.07572	390.172	8	3	2.8928	TRUE
CHEMBL4795863	84	nM	C=CC(=O)Nc1cccc(-c2c(-c3ccc(N4CCN(C)CC4)cc3)[nH]c3ncn(CC)c(=O)c23)c1	7.07572	482.243	6	2	3.9548	TRUE
CHEMBL414220	85	nM	C=CCN(C)CC#CC(=O)Nc1ccc2ncnc(Nc3cccc(Br)c3)c2c1	7.07058	449.085	5	2	4.1956	TRUE
CHEMBL248891	85	nM	COCc1cccc2[nH]c(-c3n[nH]c4ncc(-c5cncc6ccccc56)cc34)nc12	7.07058	406.154	5	2	4.8628	TRUE
CHEMBL3680378	85.98	nM	COc1cc2ncnc(Nc3ccc(F)c(Cl)c3)c2cc1NC(=O)/C=C/CN1CCCCCC1	7.0656	483.184	6	2	5.5452	TRUE
CHEMBL501705	87	nM	CCS(=O)(=O)N[C@H]1CN[C@H](C#Cc2cc3ncnc(Nc4ccc(OCc5cccc(F)c5)c(Cl)c4)c3s2)C1	7.06048	585.107	8	3	4.8277	TRUE
CHEMBL455433	87	nM	O=C(O[C@H]1CN[C@H](C#Cc2cc3ncnc(NCc4cccc(Oc5ccccc5)c4)c3s2)C1)N1CCOCC1	7.06048	555.194	9	2	4.6465	TRUE
CHEMBL427671	88	nM	Cc1ccn2ncnc(Nc3ccc4c(cnn4Cc4cccc(F)c4)c3)c12	7.05552	372.15	6	1	4.31842	TRUE
CHEMBL5193128	88	nM	C=CC(=O)N1CCC([C@@H]2CCNC3C(C(N)=O)C(c4ccc(Oc5ccccc5)cc4)=NN32)CC1	7.05552	473.243	6	2	2.7127	TRUE
CHEMBL249303	89	nM	CCN(CC)Cc1cccc2[nH]c(-c3n[nH]c4ncc(-c5cncc6ccccc56)cc34)nc12	7.05061	447.217	5	2	5.5582	TRUE
CHEMBL3921555	89	nM	CN1CCN(C/C=C/C(=O)Nc2cc3c(Nc4ccc(F)c(Cl)c4)ncnc3cn2)CC1	7.05061	455.164	7	2	3.303	TRUE
CHEMBL2408051	89	nM	CNC(=O)CN1CCC(Oc2cc3c(Nc4ccc(F)c(Cl)c4F)ncnc3cc2OC)CC1	7.05061	491.154	7	2	3.9028	TRUE
CHEMBL381115	90	nM	COc1ccc(I)c(Sc2nc3c(N)ncnc3n2CCNCC(C)(C)C)c1	7.04576	512.086	8	2	3.8086	TRUE
CHEMBL402011	90	nM	C[C@@H](Oc1cccc2ncnc(Nc3ccc4c(cnn4Cc4ccccn4)c3)c12)C(=O)N(C)C	7.04576	467.207	8	1	4.0219	TRUE
CHEMBL394333	90	nM	NCCOCc1ccn2ncnc(Nc3ccc4c(cnn4Cc4cccc(F)c4)c3)c12	7.04576	431.187	8	2	3.4853	TRUE
CHEMBL204625	91	nM	Nc1ccccc1C#Cc1cncnc1Nc1ccc(OCc2cccc(F)c2)c(Cl)c1	7.04096	444.115	5	2	5.5737	TRUE
CHEMBL3895468	91	nM	CN(C)C/C=C/C(=O)Nc1cc2c(Nc3ccc(F)c(Cl)c3)ncnc2cc1OCC12COCC1C2	7.04096	511.179	7	2	4.6375	TRUE
CHEMBL221698	92	nM	O=C(NO)[C@H]1CC2(CC2)CN[C@@H]1C(=O)N1CC[C@H](c2ccccc2)C1	7.03621	343.19	4	3	1.2662	TRUE
CHEMBL230575	94	nM	COCC(=O)NCC#Cc1ccc2ncnc(Nc3ccc(OC4CCN(C(=O)CC(C)(C)C)CC4)c(C)c3)c2c1	7.02687	557.3	7	2	4.60192	TRUE
CHEMBL255438	95	nM	Nc1ncnc(Nc2ccc3c(cnn3Cc3cccc(F)c3)c2)c1/C=N/OCc1ccccc1	7.02228	467.187	8	2	4.8902	TRUE
CHEMBL15346	95	nM	CS(=O)(=O)CCNCCCCOc1ccc2ncnc(Nc3ccc(OCc4ccccc4)cc3)c2c1	7.02228	520.214	8	2	4.7456	TRUE
CHEMBL1683973	95	nM	Cc1ncnc(Nc2ccc(OCc3cccc(F)c3)c(Cl)c2)c1C#CCCCN1CCCC1	7.02228	478.194	5	1	6.12762	TRUE
CHEMBL230995	96	nM	COc1ccc2ncnc(Nc3ccc(OC4CCN(C(=O)CC(C)(C)C)CC4)c(C)c3)c2c1	7.01773	462.263	6	1	5.49642	TRUE
CHEMBL3357642	97.1	nM	CN(C)C/C=C(/F)C(=O)Nc1cc2c(Nc3ccc(F)c(Cl)c3)ncnc2cc1O[C@H]1CCOC1	7.01278	503.154	7	2	4.6871	TRUE
CHEMBL523076	99	nM	O=C(NO)[C@H]1CC(CC(=O)N2CCCC2)CC[C@@H]1C(=O)N1CCN(c2ccccc2)CC1	7.00436	442.258	5	2	1.8856	TRUE
CHEMBL3932057	100	nM	C[C@@H](Nc1ncnc2[nH]c(-c3ccc(NCc4ccc(C(=O)NO)cc4)cc3)cc12)c1ccccc1	7	478.212	6	5	5.5291	TRUE
CHEMBL3917105	100	nM	O=C(CCCCCN1CCN(Cc2ccc(-c3cc4c(NCc5ccccc5)ncnc4[nH]3)cc2)CC1)NO	7	527.301	7	4	4.4204	TRUE
CHEMBL201871	100	nM	COc1ccc(I)c(Sc2nc3c(N)ncnc3n2CCNCC(C)C)c1	7	498.07	8	2	3.4185	TRUE
CHEMBL3933895	100	nM	CCOc1cc2ncnc(Nc3ccc4c(ccn4S(=O)(=O)c4ccccc4)c3)c2cc1NC(=O)/C=C/CN1CCOCC1	7	612.215	10	2	4.7907	TRUE
CHEMBL3914322	100	nM	C[C@@H](Nc1ncnc2[nH]c(-c3ccc(OCCCCCCC(=O)NO)cc3)cc12)c1ccc(F)cc1	7	491.233	6	4	5.7718	TRUE
CHEMBL2348419	100	nM	COC(=O)C1=Cc2c(ncnc2Nc2ccc(Oc3cccc(C(F)(F)F)c3)c(Cl)c2)NCC1	7	490.102	7	2	6.0567	TRUE
CHEMBL3951620	100	nM	C[C@@H](Nc1ncnc2[nH]c(-c3ccc(OCCCCCCC(=O)NO)cc3)cc12)c1ccccc1	7	473.243	6	4	5.6327	TRUE
CHEMBL3977504	100	nM	CN(C)C/C=C/C(=O)Nc1cc2c(Nc3ccc(Oc4ccccc4)cc3)ncnc2cn1	7	440.196	7	2	4.617	TRUE
CHEMBL3968968	100	nM	C[C@@H](Nc1ncnc2[nH]c(-c3ccc(CNCc4ccc(C(=O)NO)cc4)cc3)cc12)c1ccccc1	7	492.227	6	5	5.2068	TRUE
CHEMBL3901236	100	nM	C[C@@H](Nc1ncnc2[nH]c(-c3ccc(CNCCCCCCC(=O)NO)cc3)cc12)c1ccccc1	7	486.274	6	5	5.3435	TRUE
CHEMBL3981584	100	nM	O=C(NO)c1ccc(-c2cc3c(NCc4ccccc4)ncnc3[nH]2)cc1	7	359.138	5	4	3.356	TRUE
CHEMBL3936547	100	nM	C[C@@H](Nc1ncnc2[nH]c(-c3ccc(CNCCCCCC(=O)NO)cc3)cc12)c1ccccc1	7	472.259	6	5	4.9534	TRUE
CHEMBL3984055	100	nM	C[C@@H](Nc1ncnc2[nH]c(-c3ccc(C(=O)NO)cc3)cc12)c1ccc(F)cc1	7	391.144	5	4	4.0561	TRUE
CHEMBL3950023	100	nM	C[C@@H](Nc1ncnc2[nH]c(-c3ccc(NC(=O)CCNCC(=O)NO)cc3)cc12)c1ccccc1	7	473.218	7	6	3.2216	TRUE
CHEMBL3984573	100	nM	C[C@@H](Nc1ncnc2[nH]c(-c3ccc(C(=O)NCCNCCC(=O)NO)cc3)cc12)c1ccccc1	7	487.233	7	6	3.0129	TRUE
CHEMBL3917093	100	nM	C[C@@H](Nc1ncnc2c1cc(-c1ccc(C(=O)NCCNCCCCCCC(=O)NO)cc1)n2C)c1ccccc1	7	557.311	8	5	4.5837	TRUE
CHEMBL521719	100	nM	O=C(NO)[C@H]1CC2(CC[C@@H]1C(=O)N1CCN(c3ccccc3)CC1)CC2	7	357.205	4	2	2.0371	TRUE
CHEMBL3898444	100	nM	C#Cc1cccc(Nc2ncnc3cc(OCCCCCCC(=O)NO)c(OCCOC)cc23)c1	7	478.222	8	3	4.2146	TRUE
CHEMBL3907491	100	nM	C[C@@H](Nc1ncnc2[nH]c(-c3ccc(CNCCC(=O)NO)cc3)cc12)c1ccccc1	7	430.212	6	5	3.7831	TRUE
CHEMBL3921652	100	nM	C[C@@H](Nc1ncnc2[nH]c(-c3ccc(NC(=O)CCCC(=O)NO)cc3)cc12)c1ccccc1	7	458.207	6	5	4.4122	TRUE
CHEMBL3938265	100	nM	C[C@@H](Nc1ncnc2[nH]c(-c3ccc(CN4CCN(CCCCCC(=O)NO)CC4)cc3)cc12)c1ccccc1	7	541.317	7	4	4.9814	TRUE
CHEMBL3977186	100	nM	C[C@@H](Nc1ncnc2[nH]c(-c3ccc(OCCCC(=O)NO)cc3)cc12)c1ccccc1	7	431.196	6	4	4.4624	TRUE
CHEMBL3961102	100	nM	C[C@@H](Nc1ncnc2[nH]c(-c3ccc(NC(=O)CCC(=O)NO)cc3)cc12)c1ccccc1	7	444.191	6	5	4.0221	TRUE
CHEMBL497222	100	nM	CN1CCN(C(=O)CC2CC[C@H](C(=O)N3CCN(c4ccccc4)CC3)[C@@H](C(=O)NO)C2)CC1	7	471.285	6	2	1.0372	TRUE
CHEMBL3924346	100	nM	C[C@@H](Nc1ncnc2[nH]c(-c3ccc(NC(=O)CCCCC(=O)NO)cc3)cc12)c1ccccc1	7	472.222	6	5	4.8023	TRUE
CHEMBL3899385	100	nM	C[C@@H](Nc1ncnc2[nH]c(-c3ccc(OCCCCC(=O)NO)cc3)cc12)c1ccccc1	7	445.211	6	4	4.8525	TRUE
CHEMBL3902161	100	nM	C[C@@H](Nc1ncnc2[nH]c(-c3ccc(OCCCCCC(=O)NO)cc3)cc12)c1ccccc1	7	459.227	6	4	5.2426	TRUE
CHEMBL3901144	100	nM	C#Cc1cccc(Nc2ncnc3cc(OC)c(NC(=O)CCCCCCC(=O)NO)cc23)c1	7	461.206	7	4	4.1478	TRUE
CHEMBL3909900	100	nM	C#Cc1cc(Nc2ncnc3cc(OCCOC)c(OCCCCCCCC(=O)NO)cc23)ccc1F	7	510.228	8	3	4.7438	TRUE
CHEMBL3959043	100	nM	C#Cc1cc(Nc2ncnc3cc(OC)c(OCCCCCCCC(=O)NO)cc23)ccc1F	7	466.202	7	3	4.7272	TRUE
CHEMBL516487	100	nM	COC(=O)c1c(N)ncnc1Nc1ccc(OCc2ccccc2)c(Cl)c1	7	384.099	7	2	3.8214	TRUE
CHEMBL3972249	100	nM	C[C@@H](Nc1ncnc2[nH]c(-c3ccc(CN4CCN(CCCCC(=O)NO)CC4)cc3)cc12)c1ccccc1	7	527.301	7	4	4.5913	TRUE
CHEMBL230994	100	nM	COc1cc2ncnc(Nc3ccc(OC4CCN(C(=O)CC(C)(C)C)CC4)c(C)c3)c2cc1OC	7	492.274	7	1	5.50502	TRUE
CHEMBL3896779	102	nM	O=C(/C=C/CN1CCCC1)Nc1cc2c(Nc3ccc(Oc4ccccc4)cc3)ncnc2cn1	6.9914	466.212	7	2	5.1512	TRUE
CHEMBL496211	102	nM	CN1CC(CC(=O)N2CCCCC2)C[C@H](C(=O)NO)[C@H]1C(=O)N1CCN(c2ccccc2)CC1	6.9914	471.285	6	2	1.1797	TRUE
CHEMBL4582195	104	nM	O=C(CSC(=S)N1CCCCC1)Nc1cccc(NC(=O)c2ccccn2)c1	6.98297	414.118	5	2	3.7764	TRUE
CHEMBL438536	107	nM	Cc1cc(Nc2ncnc3[nH]nc(OCCN4CCC(O)CC4)c23)ccc1OCc1cccc(F)c1	6.97062	492.229	8	3	3.95852	TRUE
CHEMBL218677	107	nM	COc1cc2ncnc(Nc3cccc(Cl)c3F)c2cc1OC1CCN(CC(N)=O)CC1	6.97062	459.147	7	2	3.503	TRUE
CHEMBL5204417	108	nM	CC(=O)NNC(=O)c1csc2ncc(-c3ccc(Br)cc3)n12	6.96658	377.979	5	2	2.6062	TRUE
CHEMBL234772	110	nM	O=C(O)C1CCN(Cc2ccn3ncnc(Nc4ccc5c(cnn5Cc5cccc(F)c5)c4)c23)CC1	6.95861	499.213	8	2	4.3066	TRUE
CHEMBL194958	110	nM	CCc1c(C(N)=O)cn2ncnc(Nc3ccc4c(cnn4Cc4ccccc4)c3)c12	6.95861	411.181	7	2	3.5322	TRUE
CHEMBL247309	110	nM	CN(C)C1CCN(Cc2ccn3ncnc(Nc4ccc5c(cnn5Cc5cccc(F)c5)c4)c23)CC1	6.95861	498.266	8	1	4.536	TRUE
CHEMBL140561	110	nM	CN(C)CCCOC(=O)/C=C/C(=O)Nc1ccc2ncnc(Nc3cccc(Br)c3)c2c1	6.95861	497.106	7	2	4.1255	TRUE
CHEMBL391521	110	nM	CN(CCO)Cc1ccn2ncnc(Nc3ccc4c(cnn4Cc4cccc(F)c4)c3)c12	6.95861	445.203	8	2	3.4341	TRUE
CHEMBL246276	110	nM	OCc1ccn2ncnc(Nc3ccc4c(cnn4Cc4cccc(F)c4)c3)c12	6.95861	388.145	7	2	3.5023	TRUE
CHEMBL246694	110	nM	NC(=O)COCc1ccn2ncnc(Nc3ccc4c(cnn4Cc4cccc(F)c4)c3)c12	6.95861	445.166	8	2	3.0119	TRUE
CHEMBL429827	110	nM	Cc1ccn2ncnc(Nc3ccc4c(cnn4Cc4ccccc4)c3)c12	6.95861	354.159	6	1	4.17932	TRUE
CHEMBL3092308	112	nM	O=C(NCCN1CCCC1)Nc1cc2c(Nc3ccc(F)c(Cl)c3)ncnc2cc1O[C@H]1CCOC1	6.95078	514.19	7	3	4.5509	TRUE
CHEMBL91811	113	nM	CC(C)N(C)CC#CC(=O)Nc1ccc2ncnc(Nc3cccc(Br)c3)c2c1	6.94692	451.101	5	2	4.418	TRUE
CHEMBL473427	113	nM	Fc1cccc(COc2ccc(Nc3ncnc4cc(-c5cccs5)sc34)cc2Cl)c1	6.94692	467.033	6	1	7.5349	TRUE
CHEMBL388978	115	nM	CN[C@@H]1C[C@H]2O[C@@](C)([C@@H]1OC)n1c3ccccc3c3c4c(c5c6ccccc6n2c5c31)C(=O)NC4	6.9393	466.2	6	2	4.354	TRUE
CHEMBL327838	116	nM	COCCOCC#CC(=O)Nc1ccc2ncnc(Nc3cccc(Br)c3)c2c1	6.93554	454.064	6	2	3.7408	TRUE
CHEMBL93784	117	nM	COCC1CCCN1CC#CC(=O)Nc1ccc2ncnc(Nc3cccc(Br)c3)c2c1	6.93181	493.111	6	2	4.1886	TRUE
CHEMBL525725	118	nM	COc1ccc(/N=C/c2c(N)ncnc2Nc2ccc3c(cnn3Cc3cccc(F)c3)c2)cc1	6.92812	467.187	8	2	5.0987	TRUE
CHEMBL2408046	120	nM	CCNC(=O)CN1CCC(Oc2cc3c(Nc4cccc(Cl)c4F)ncnc3cc2OC)CC1	6.92082	487.179	7	2	4.1538	TRUE
CHEMBL232082	120	nM	CN1CCN(Cc2ccn3ncnc(Nc4ccc5c(cnn5Cc5cccc(F)c5)c4)c23)CC1	6.92082	470.234	8	1	3.7574	TRUE
CHEMBL246072	120	nM	Fc1cccc(Cn2ncc3cc(Nc4ncnn5ccc(COCC6CCNCC6)c45)ccc32)c1	6.92082	485.234	8	2	4.5262	TRUE
CHEMBL234577	120	nM	CN1CCCN(Cc2ccn3ncnc(Nc4ccc5c(cnn5Cc5cccc(F)c5)c4)c23)CC1	6.92082	484.25	8	1	4.1475	TRUE
CHEMBL400413	120	nM	CS(=O)(=O)N1CCCN(Cc2ccn3ncnc(Nc4ccc5c(cnn5Cc5cccc(F)c5)c4)c23)CC1	6.92082	548.212	9	1	3.4773	TRUE
CHEMBL1922904	120	nM	FC(F)(F)c1ccccc1Oc1ccc(Nc2ncnc3cc[nH]c23)cc1Cl	6.92082	404.065	4	2	6.166	TRUE
CHEMBL258353	120	nM	CN(CCO)C(=O)COc1cccc2ncnc(Nc3ccc(OCc4ccccn4)c(Cl)c3)c12	6.92082	493.152	8	2	3.8303	TRUE
CHEMBL247513	120	nM	O=C(CO)NC1CCN(Cc2ccn3ncnc(Nc4ccc5c(cnn5Cc5cccc(F)c5)c4)c23)CC1	6.92082	528.24	9	3	3.0829	TRUE
CHEMBL473436	121	nM	Fc1cccc(COc2ccc(Nc3ncnc4cc(-c5ccc[nH]5)sc34)cc2Cl)c1	6.91721	450.072	5	2	6.8015	TRUE
CHEMBL5204650	121	nM	NNC(=O)c1csc2nc(CN3CCOCC3)c(-c3ccc(Br)cc3)n12	6.91721	435.036	7	2	2.261	TRUE
CHEMBL473428	122	nM	OCc1ccc(-c2cc3ncnc(Nc4ccc(OCc5cccc(F)c5)c(Cl)c4)c3s2)o1	6.91364	481.066	7	2	6.5587	TRUE
CHEMBL93049	122	nM	COCOCC#CC(=O)Nc1ccc2ncnc(Nc3cccc(Br)c3)c2c1	6.91364	440.048	6	2	3.6983	TRUE
CHEMBL328977	124	nM	O=C(C#CCN1CCSCC1)Nc1ccc2ncnc(Nc3cccc(Br)c3)c2c1	6.90658	481.057	6	2	4.1266	TRUE
CHEMBL3977326	124	nM	CCC(=O)Nc1cc2c(Nc3ccc4c(ccn4Cc4ccccc4)c3)ncnc2cc1OC	6.90658	451.201	6	2	5.7335	TRUE
CHEMBL31816	125	nM	C=CC(=O)Nc1nc2c(Nc3ccc(F)c(Cl)c3)ncnc2cc1OC	6.90309	373.074	6	2	3.694	TRUE
CHEMBL3633932	126	nM	CCNC(=O)Nc1ccc2ncnc(Nc3ccc(OCc4cccc(F)c4)c(Cl)c3)c2c1	6.89963	465.137	5	3	5.8863	TRUE
CHEMBL258270	129	nM	CC(=O)N1CCN(CCOc2n[nH]c3ncnc(Nc4ccc(OCc5ccccn5)c(Cl)c4)c23)CC1	6.88941	522.189	9	2	3.2668	TRUE
CHEMBL394495	130	nM	C[C@H](c1ccccc1)n1ncc2cc(Nc3ncnn4ccc(COC[C@@H]5CNCCO5)c34)ccc21	6.88606	483.238	9	2	3.9369	TRUE
CHEMBL256996	130	nM	C[C@H](Oc1cccc2ncnc(Nc3ccc4c(cnn4Cc4cscn4)c3)c12)C(=O)N(C)C	6.88606	473.163	9	1	4.0834	TRUE
CHEMBL245867	130	nM	NCCCCOCc1ccn2ncnc(Nc3ccc4c(cnn4Cc4cccc(F)c4)c3)c12	6.88606	459.218	8	2	4.2655	TRUE
CHEMBL255337	130	nM	Cc1ccc(Oc2ccc(Nc3ncnc4cccc(OCC(=O)N(C)CCO)c34)cc2C)cn1	6.88606	473.206	8	2	4.00704	TRUE
CHEMBL2048792	130	nM	O=C1Cc2ccc(Oc3ccc(Nc4ncnc5ccn(CCO)c45)cc3Cl)cc2N1	6.88606	435.11	7	3	4.1075	TRUE
CHEMBL197689	130	nM	CCc1c(C(=O)NC)cn2ncnc(Nc3ccc4c(cnn4Cc4ccccc4)c3)c12	6.88606	425.196	7	2	3.7929	TRUE
CHEMBL1336	131	nM	CNC(=O)c1cc(Oc2ccc(NC(=O)Nc3ccc(Cl)c(C(F)(F)F)c3)cc2)ccn1	6.88273	464.086	4	3	5.5497	TRUE
CHEMBL1928946	135	nM	CC(=O)Nc1cccc(Oc2cc(Nc3ccc(OCc4cccc(F)c4)c(Cl)c3)ncn2)c1	6.86967	478.121	6	2	6.3424	TRUE
CHEMBL445717	137	nM	O=C(CC1CN[C@H](C(=O)N2CCC(c3ccccc3)C2)[C@@H](C(=O)NO)C1)NCCCCCNC(=O)OCc1ccccc1	6.86328	593.321	7	5	2.7052	TRUE
CHEMBL395591	140	nM	Fc1cccc(Cn2ncc3cc(Nc4ncnn5ccc(COCC6CNCCOC6)c45)ccc32)c1	6.85387	501.229	9	2	3.7626	TRUE
CHEMBL1683955	140	nM	Cc1ncnc(Nc2ccc(OCc3cccc(F)c3)c(Cl)c2)c1C	6.85387	357.104	4	1	5.20854	TRUE
CHEMBL199532	140	nM	COc1ccc(I)c(Sc2nc3c(N)ncnc3n2CCCNC(C)(C)C)c1	6.85387	512.086	8	2	3.9511	TRUE
CHEMBL438440	140	nM	Fc1cccc(COc2ccc(Nc3ncncc3C#Cc3cccnc3)cc2Cl)c1	6.85387	430.1	5	1	5.3865	TRUE
CHEMBL257196	140	nM	C[C@@H](Oc1cccc2ncnc(Nc3ccc4c(cnn4Cc4cscn4)c3)c12)C(N)=O	6.85387	445.132	9	2	3.4805	TRUE
CHEMBL391437	140	nM	c1ccc2c(-c3cnc4[nH]nc(-c5nc6ccccc6[nH]5)c4c3)cncc2c1	6.85387	362.128	4	2	4.7164	TRUE
CHEMBL413997	140	nM	C[C@H](Oc1cccc2ncnc(Nc3ccc4c(cnn4Cc4ccccn4)c3)c12)C(=O)N1CCOCC1	6.85387	509.218	9	1	3.7925	TRUE
CHEMBL258354	140	nM	O=C(COc1cccc2ncnc(Nc3ccc(OCc4ccccn4)c(Cl)c3)c12)N1CCOCC1	6.85387	505.152	8	1	4.2384	TRUE
CHEMBL5194543	146	nM	Cc1ccc(-c2c(CN3CCCCC3)nc3scc(C(=O)O)n23)cc1	6.83565	355.135	5	1	4.05532	TRUE
CHEMBL511478	146	nM	NNC(=O)c1c(N)ncnc1Nc1ccc(OCc2ccccc2)c(Cl)c1	6.83565	384.11	7	4	2.6383	TRUE
CHEMBL4785221	146	nM	C=CC(=O)Nc1cccc(-c2c(-c3ccc(N4CCN(C)CC4)cc3)[nH]c3ncn(C)c(=O)c23)c1	6.83565	468.227	6	2	3.4719	TRUE
CHEMBL460732	147	nM	CS(=O)(=O)CCNCCCCOc1ccc2ncnc(Nc3ccc(S(=O)(=O)c4ccccc4)cc3)c2c1	6.83268	554.166	9	2	3.9994	TRUE
CHEMBL270448	148	nM	Clc1cc(Nc2ncnc3[nH]nc(OCCN4CCCCCO4)c23)ccc1OCc1ccccn1	6.82974	495.179	9	2	4.5202	TRUE
CHEMBL4577883	148.3	nM	COC[C@@H](C)Oc1cc2ncnc(Nc3ccc(F)c(Cl)c3)c2cc1NC(=O)/C=C/CN(C)C	6.82886	487.179	7	2	4.6359	TRUE
CHEMBL3357641	149.4	nM	CN(C)C/C=C(\F)C(=O)Nc1cc2c(Nc3ccc(F)c(Cl)c3)ncnc2cc1O[C@H]1CCOC1	6.82565	503.154	7	2	4.6871	TRUE
CHEMBL1683961	150	nM	Cc1ncnc(Nc2ccc(OCc3cccc(F)c3)c(Cl)c2)c1C#CCCCN1CCOCC1	6.82391	494.188	6	1	5.36402	TRUE
CHEMBL2048793	150	nM	O=C1NCc2c(Oc3ccc(Nc4ncnc5ccn(CCO)c45)cc3Cl)cccc21	6.82391	435.11	7	3	3.8563	TRUE
CHEMBL230574	150	nM	COCC(=O)NCC#Cc1ccc2ncnc(Nc3ccc(OC4CCN(C(=O)C5CCC5)CC4)c(C)c3)c2c1	6.82391	541.269	7	2	3.96582	TRUE
CHEMBL257815	153	nM	CO/N=C/c1c(N)ncnc1Nc1ccc(OCc2ccccc2)c(Cl)c1	6.81531	383.115	7	2	4.0151	TRUE
CHEMBL3948084	153	nM	CCC(=O)Nc1cc2c(Nc3ccc4c(cnn4Cc4ccccc4)c3)ncnc2cc1OC	6.81531	452.196	7	2	5.1285	TRUE
CHEMBL205047	160	nM	OCc1nc(C#Cc2cncnc2Nc2ccc(OCc3cccc(F)c3)c(Cl)c2)cs1	6.79588	466.067	7	2	4.9403	TRUE
CHEMBL404327	160	nM	C[C@@H](Oc1cccc2ncnc(Nc3ccc4c(cnn4Cc4cscn4)c3)c12)C(=O)N1CCOCC1	6.79588	515.174	10	1	3.854	TRUE
CHEMBL568356	162	nM	NCCCCNC(=O)CC1CN[C@H](C(=O)N2CCC(c3ccccc3)C2)[C@@H](C(=O)NO)C1	6.79048	445.269	6	5	0.3474	TRUE
CHEMBL92961	162	nM	CC(C)N(CC#CC(=O)Nc1ccc2ncnc(Nc3cccc(Br)c3)c2c1)C(C)C	6.79048	479.132	5	2	5.1966	TRUE
CHEMBL495797	162	nM	NCCCCCNC(=O)CC1CN[C@H](C(=O)N2CCC(c3ccccc3)C2)[C@@H](C(=O)NO)C1	6.79048	459.285	6	5	0.7375	TRUE
CHEMBL3920583	165.5	nM	O=C(CCCCCn1cc(-c2ccc3ncnc(Nc4ccc(F)c(Cl)c4)c3c2)nn1)NO	6.7812	469.143	8	3	4.4902	TRUE
CHEMBL392774	170	nM	COC1CNCCN(Cc2ccn3ncnc(Nc4ccc5c(cnn5Cc5cccc(F)c5)c4)c23)C1	6.76955	500.245	9	2	3.4302	TRUE
CHEMBL246073	170	nM	Fc1cccc(Cn2ncc3cc(Nc4ncnn5ccc(COC[C@H]6CCCNC6)c45)ccc32)c1	6.76955	485.234	8	2	4.5262	TRUE
CHEMBL5199520	170	nM	NS(=O)(=O)c1ccc(CCn2c(SCC(=O)Nc3ccc(Cl)cc3)nc3ccccc3c2=O)cc1	6.76955	528.069	7	2	3.6708	TRUE
CHEMBL496629	170	nM	O=C(NO)[C@H]1C[C@H](CC(=O)N2CCCCC2)CC[C@@H]1C(=O)N1CCN(c2ccccc2)CC1	6.76955	456.274	5	2	2.2757	TRUE
CHEMBL247711	170	nM	COc1cn2ncnc(Nc3ccc4c(cnn4Cc4cccc(F)c4)c3)c2c1CN1CCCNCC1	6.76955	500.245	9	2	3.8139	TRUE
CHEMBL430031	173	nM	CC(C)CO/N=C/c1c(N)ncnc1Nc1ccc2c(cnn2Cc2cccc(F)c2)c1	6.76195	433.203	8	2	4.346	TRUE
CHEMBL3957416	174	nM	CCOc1cc2ncnc(Nc3ccc(NS(=O)(=O)c4ccccc4)cc3)c2cc1NC(=O)/C=C/CN1CCOCC1	6.75945	588.215	9	3	4.3998	TRUE
CHEMBL3930620	174.9	nM	O=C(CCCCCCn1cc(-c2ccc3ncnc(Nc4cccc(Cl)c4F)c3c2)nn1)NO	6.75721	483.159	8	3	4.8803	TRUE
CHEMBL598406	175	nM	COc1cc2ncnc(N[C@@H](C)c3ccc(F)cc3)c2cc1OCCCCCCC(=O)NO	6.75696	456.217	7	3	4.7853	TRUE
CHEMBL3957055	176.7	nM	O=C(CCCCCCn1cc(-c2ccc3ncnc(Nc4ccc(F)c(Cl)c4)c3c2)nn1)NO	6.75276	483.159	8	3	4.8803	TRUE
CHEMBL328245	177	nM	CCCN(CC#CC(=O)Nc1ccc2ncnc(Nc3cccc(Br)c3)c2c1)CCC	6.75203	479.132	5	2	5.1998	TRUE
CHEMBL116853	180	nM	COc1cc2ncc(C#N)c(Nc3cccc(Br)c3)c2cc1NC(=O)C#CCN(C)C	6.74473	477.08	6	2	4.12468	TRUE
CHEMBL381521	180	nM	COc1ccc(I)c(Sc2nc3c(N)ncnc3n2CCCNC(C)C)c1	6.74473	498.07	8	2	3.561	TRUE
CHEMBL196925	180	nM	CCOC(=O)c1cn2ncnc(Nc3ccc4c(cnn4Cc4ccccc4)c3)c2c1CC	6.74473	440.196	8	1	4.61	TRUE
CHEMBL247512	180	nM	CC(=O)NC1CCN(Cc2ccn3ncnc(Nc4ccc5c(cnn5Cc5cccc(F)c5)c4)c23)CC1	6.74473	512.245	8	2	4.1105	TRUE
CHEMBL272929	180	nM	NC(=O)COc1cccc2ncnc(Nc3ccc(OCc4ccccn4)c(Cl)c3)c12	6.74473	435.11	7	2	3.8649	TRUE
CHEMBL284326	182	nM	C=CC(=O)Nc1nc2c(Nc3ccc(F)c(Cl)c3)ncnc2cc1OCCCN1CCN(C)CC1	6.73993	499.19	8	2	3.7017	TRUE
CHEMBL92356	183	nM	CCN1CCN(CC#CC(=O)Nc2ccc3ncnc(Nc4cccc(Br)c4)c3c2)CC1	6.73755	492.127	6	2	3.7153	TRUE
CHEMBL255170	184	nM	Cc1ccc(Oc2ccc(Nc3ncnc4[nH]nc(OCCN5CCC(O)CC5)c34)cc2Cl)cn1	6.73518	495.179	9	3	4.08112	TRUE
CHEMBL249496	186	nM	Nc1ncnc2c1c(-c1ccc3nc(Cc4ccccc4)[nH]c3c1)nn2[C@H]1CC[C@H](N2CCOCC2)CC1	6.73049	508.27	8	2	4.3585	TRUE
CHEMBL31656	189	nM	C=CC(=O)Nc1nc2c(Nc3ccc(F)c(Cl)c3)ncnc2cc1OCCCN1CCOCC1	6.72354	486.158	8	2	3.7865	TRUE
CHEMBL256527	189	nM	CO/N=C/c1c(N)ncnc1Nc1ccc2c(cnn2Cc2ccc(F)cc2)c1	6.72354	391.156	8	2	3.3198	TRUE
CHEMBL4079768	190	nM	C#Cc1cccc(Nc2ncnc3ccc(OCCCOP(N)(=O)N(CCCl)CCCl)cc23)c1	6.72125	521.115	6	2	4.9866	TRUE
CHEMBL246898	190	nM	CS(=O)(=O)CCNC1CCN(Cc2ccn3ncnc(Nc4ccc5c(cnn5Cc5cccc(F)c5)c4)c23)CC1	6.72125	576.243	10	2	3.6086	TRUE
CHEMBL247916	190	nM	NC1CCN(Cc2ccn3ncnc(Nc4ccc5c(cnn5Cc5ccncc5)c4)c23)CC1	6.72125	453.239	9	2	3.189	TRUE
CHEMBL496018	194	nM	CN1CC(CC(=O)N2CCCC2)C[C@H](C(=O)NO)[C@H]1C(=O)N1CCN(c2ccccc2)CC1	6.7122	457.269	6	2	0.7896	TRUE
CHEMBL157084	200	nM	CS(=O)(=O)CCNc1nc(-c2ccc3ncnc(Nc4ccc(F)c(Cl)c4)c3c2)cs1	6.69897	477.05	8	2	4.7459	TRUE
CHEMBL181742	200	nM	Clc1cc(Nc2ncnc3nn4ccccc4c23)ccc1OCc1ccccc1	6.69897	401.104	6	1	5.2535	TRUE
CHEMBL3325477	200	nM	CCOC(=O)C1=C(N)N(c2cccnc2)C2=C(C(=O)CCC2)C1c1cc2ccccc2n2nnnc12	6.69897	481.186	10	1	3.0168	TRUE
CHEMBL196738	200	nM	CCOC(=O)c1cn2ncnc(Nc3ccc4c(cnn4Cc4ccccc4)c3)c2c1C	6.69897	426.18	8	1	4.35602	TRUE
CHEMBL265629	200	nM	O=C1CN(Cc2ccn3ncnc(Nc4ccc5c(cnn5Cc5cccc(F)c5)c4)c23)CCN1	6.69897	470.198	8	2	2.9418	TRUE
CHEMBL271668	200	nM	Cc1ccc(Oc2ccc(Nc3ncnc4cccc(O[C@H](C)C(=O)NCCO)c34)cc2C)cn1	6.69897	473.206	8	3	4.05334	TRUE
CHEMBL483082	200	nM	Nc1nc(Nc2ccc(S(N)(=O)=O)cc2)nn1C(=O)c1sccc1-n1cccc1	6.69897	429.068	10	3	1.792	TRUE
CHEMBL475600	203	nM	Fc1cccc(COc2ccc(Nc3ncnc4sc(-c5ccc[nH]5)cc34)cc2Cl)c1	6.6925	450.072	5	2	6.8015	TRUE
CHEMBL255490	204	nM	CO/N=C/c1c(N)ncnc1Nc1ccc(F)c(Cl)c1	6.69037	295.064	6	2	2.5752	TRUE
CHEMBL345109	207	nM	CN(C)CCCNC(=O)/C=C/C(=O)Nc1ccc2ncnc(Nc3cccc(Br)c3)c2c1	6.68403	496.122	6	3	3.6985	TRUE
CHEMBL496825	208	nM	O=C(NO)[C@H]1CC(CC(=O)N2CCOCC2)CC[C@@H]1C(=O)N1CCN(c2ccccc2)CC1	6.68194	458.253	6	2	1.122	TRUE
CHEMBL365606	210	nM	CCOC(=O)c1cn2ncnc(Nc3ccc4c(cnn4Cc4ccccc4)c3)c2c1C(C)C	6.67778	454.212	8	1	5.171	TRUE
CHEMBL381376	210	nM	CCC(C)NCCCn1c(Sc2cc(OC)ccc2I)nc2c(N)ncnc21	6.67778	512.086	8	2	3.9511	TRUE
CHEMBL460731	210	nM	CS(=O)(=O)CCNCCCCOc1ccc2ncnc(Nc3ccc(F)c(Cl)c3)c2c1	6.67778	466.124	7	2	3.9591	TRUE
CHEMBL201162	210	nM	CCC(CC)NCCCn1c(Sc2cc(OC)ccc2I)nc2c(N)ncnc21	6.67778	526.101	8	2	4.3412	TRUE
CHEMBL3680376	212.11	nM	COc1cc2ncnc(Nc3ccc(F)c(Cl)c3)c2cc1NC(=O)/C=C/CN1CCCC(F)C1	6.67344	487.159	6	2	5.1031	TRUE
CHEMBL457250	220	nM	O=C(O[C@H]1CN[C@H](C#Cc2cc3ncnc(Nc4ccc(Sc5ccccn5)cc4)c3s2)C1)N1CCOCC1	6.65758	558.151	10	2	4.5319	TRUE
CHEMBL596761	225.2	nM	COc1cc2ncnc(NCc3ccccc3)c2cc1OCCCCCCC(=O)NO	6.64743	424.211	7	3	4.0852	TRUE
CHEMBL497032	226	nM	O=C(NO)[C@H]1CC(CC(=O)N2CC[C@@H](O)C2)CC[C@@H]1C(=O)N1CCN(c2ccccc2)CC1	6.64589	458.253	6	3	0.8564	TRUE
CHEMBL230786	230	nM	COCC(=O)NCC#Cc1ccc2ncnc(Nc3ccc(Oc4cccc(C(=O)NC5CCC5)c4)c(C)c3)c2c1	6.63827	549.238	7	3	4.87052	TRUE
CHEMBL387202	230	nM	CN1CC2(CC2)C[C@H](C(=O)NO)[C@H]1C(=O)N1CCN(c2ccccc2)CC1	6.63827	372.216	5	2	0.9411	TRUE
CHEMBL2408209	230	nM	CNC(=O)CN1CCCC(Oc2cc3c(Nc4cccc(Cl)c4F)ncnc3cc2OC)C1	6.63827	473.163	7	2	3.7637	TRUE
CHEMBL256995	230	nM	C[C@@H](Oc1cccc2ncnc(Nc3ccc4c(cnn4Cc4cscn4)c3)c12)C(=O)N(C)C	6.63827	473.163	9	1	4.0834	TRUE
CHEMBL5171922	230	nM	FC(F)(F)c1ccc(/C=C/c2nc(CNc3cccc(Br)c3)co2)cc1	6.63827	422.024	3	1	6.2384	TRUE
CHEMBL3114700	230	nM	C#Cc1cccc(Nc2ncnc3cc4c(cc23)N(C(=O)/C=C/CN2CCCC2)CCO4)c1	6.63827	439.201	6	1	3.7321	TRUE
CHEMBL517907	234	nM	C#Cc1cccc(Nc2ncnc3ccc(OCCCCNCCS(C)(=O)=O)cc23)c1	6.63078	438.173	7	2	3.1479	TRUE
CHEMBL14952	234	nM	CS(=O)(=O)CCNCCCOc1ccc2ncnc(Nc3ccc(OCc4ccccc4)cc3)c2c1	6.63078	506.199	8	2	4.3555	TRUE
CHEMBL1091613	240	nM	O=C(Nc1cccc(-c2nc3sccn3c2-c2ccncc2)c1)c1ccccc1Cl	6.61979	430.066	5	1	6.0305	TRUE
CHEMBL4282506	240	nM	N#CCC(=O)N/N=C1\C(=O)Nc2ccc(S(=O)(=O)N3CCOCC3)cc21	6.61979	377.079	7	2	-0.60642	TRUE
CHEMBL193368	240	nM	CCc1c(C(=O)OCCCn2ccnc2)cn2ncnc(Nc3ccc4c(cnn4Cc4ccccc4)c3)c12	6.61979	520.234	10	1	4.8769	TRUE
CHEMBL939	240	nM	COc1cc2ncnc(Nc3ccc(F)c(Cl)c3)c2cc1OCCCN1CCOCC1	6.61979	446.152	7	1	4.2756	TRUE
CHEMBL257410	240	nM	CNC(=O)[C@@H](C)Oc1cccc2ncnc(Nc3ccc4c(cnn4Cc4nccs4)c3)c12	6.61979	459.148	9	2	3.7412	TRUE
CHEMBL248890	240	nM	OCc1cccc2[nH]c(-c3n[nH]c4ncc(-c5cncc6ccccc56)cc34)nc12	6.61979	392.139	5	3	4.2087	TRUE
CHEMBL5176561	244	nM	CCC(=O)NNC(=O)c1csc2ncc(-c3ccc(C)cc3)n12	6.61261	328.099	5	2	2.54222	TRUE
CHEMBL3680377	247.12	nM	COc1cc2ncnc(Nc3ccc(F)c(Cl)c3)c2cc1NC(=O)/C=C/CN1CCC(F)CC1	6.60709	487.159	6	2	5.1031	TRUE
CHEMBL394463	250	nM	Cc1ccn2ncnc(Nc3ccc4c(cnn4Cc4cccnc4)c3)c12	6.60206	355.155	7	1	3.57432	TRUE
CHEMBL4561606	250	nM	O=C(/C=C/CN1CCCC1)N1CCOc2cc3ncnc(Nc4ccc(F)c(Cl)c4)c3cc21	6.60206	467.152	6	1	4.5433	TRUE
CHEMBL2408210	250	nM	CNC(=O)CN1CCC(Oc2cc3c(Nc4cccc(Cl)c4F)ncnc3cc2OC)C1	6.60206	459.147	7	2	3.3736	TRUE
CHEMBL248877	250	nM	Nc1ncnc2c1c(-c1ccc3nc(Cc4cccs4)[nH]c3c1)nn2[C@H]1CC[C@H](N2CCOCC2)CC1	6.60206	514.226	9	2	4.42	TRUE
CHEMBL5187375	250	nM	Cc1nn(-c2ccc(F)cc2)c2c(Nc3ccc(F)c(Cl)c3)ncnc12	6.60206	371.075	5	1	4.79912	TRUE
CHEMBL395883	250	nM	COc1cn2ncnc(Nc3ccc4c(cnn4Cc4cccc(F)c4)c3)c2c1COC[C@@H]1CNCCO1	6.60206	517.224	10	2	3.5236	TRUE
CHEMBL3114690	250	nM	C#Cc1cccc(Nc2ncnc3cc4c(cc23)N(C(=O)/C=C/CN(C)C)CCO4)c1	6.60206	413.185	6	1	3.1979	TRUE
CHEMBL291126	250	nM	O=C1NC(=O)c2c1c1c3ccccc3n3c1c1c2c2ccccc2n1[C@@H]1O[C@H]3C[C@@H]1CO	6.60206	423.122	6	2	3.8256	TRUE
CHEMBL3114687	250	nM	C#Cc1cccc(Nc2ncnc3cc4c(cc23)N(C(=O)/C=C/CN(CC)CC)CCO4)c1	6.60206	441.216	6	1	3.9781	TRUE
CHEMBL2408047	250	nM	COCCNC(=O)CN1CCC(Oc2cc3c(Nc4cccc(Cl)c4F)ncnc3cc2OC)CC1	6.60206	517.189	8	2	3.7803	TRUE
CHEMBL4792279	254	nM	Cc1nn(-c2ccc(F)cc2)c2ncnc(Nc3ccc(F)c(Cl)c3)c12	6.59517	371.075	5	1	4.79912	TRUE
CHEMBL257814	255	nM	CO/N=C/c1c(N)ncnc1Nc1ccc2c(c1)CCN2Cc1cccc(F)c1	6.59346	392.176	7	2	3.4845	TRUE
CHEMBL14932	263	nM	Oc1ccc2ncnc(Nc3ccc(OCc4ccccc4)cc3)c2c1	6.58004	343.132	5	2	4.658	TRUE
CHEMBL2408050	264	nM	CNC(=O)CN1CCC(Oc2cc3c(Nc4ccc(F)c(Cl)c4)ncnc3cc2OC)CC1	6.5784	473.163	7	2	3.7637	TRUE
CHEMBL4752700	268	nM	C=CC(=O)Nc1ccc2nccc(Oc3ccc(C(=O)Nc4cc(CC)ccn4)cc3)c2c1	6.57187	438.169	5	2	5.3613	TRUE
CHEMBL503638	270	nM	CCOC(=O)N1CCN([C@H]2CC[C@H](n3nc(-c4ccc5nc(Cc6ccccc6OC)[nH]c5c4)c4c(N)ncnc43)CC2)CC1	6.56864	609.318	10	2	4.809	TRUE
CHEMBL3633940	275	nM	NC(=O)Nc1ccc(C(=O)Nc2ccc3ncnc(Nc4ccc(F)c(Cl)c4)c3c2)cc1	6.56067	450.101	5	4	4.9088	TRUE
CHEMBL191635	280	nM	C#CCCCn1c(Sc2cc(OC)ccc2I)nc2c(N)ncnc21	6.55284	465.012	7	1	3.5863	TRUE
CHEMBL246491	280	nM	COC(=O)COCc1ccn2ncnc(Nc3ccc4c(cnn4Cc4cccc(F)c4)c3)c12	6.55284	460.166	9	1	3.6996	TRUE
CHEMBL3981041	286	nM	CCC(=O)Nc1cc2c(Nc3ccc4c(ccn4S(=O)(=O)c4ccccc4)c3)ncnc2cc1OC	6.54363	501.147	8	2	4.9222	TRUE
CHEMBL3633928	287	nM	NC(=O)Nc1ccc2ncnc(Nc3ccc(OCc4cccc(F)c4)c(Cl)c3)c2c1	6.54212	437.105	5	3	5.2355	TRUE
CHEMBL3114686	290	nM	C#Cc1cccc(Nc2ncnc3cc4c(cc23)N(C(=O)/C=C/CN2CCCCC2C)CCO4)c1	6.5376	467.232	6	1	4.5107	TRUE
CHEMBL3114688	290	nM	C#Cc1cccc(Nc2ncnc3cc4c(cc23)N(C(=O)/C=C/CN2CCCCC2)CCO4)c1	6.5376	453.216	6	1	4.1222	TRUE
CHEMBL1358485	290	nM	CCN(CC)CC1CCN(c2ncc3ncnc(Nc4ccc(F)c(Cl)c4)c3n2)CC1	6.5376	443.2	7	1	4.5141	TRUE
CHEMBL3936505	290	nM	CCOc1cc2ncnc(Nc3ccc(NS(=O)(=O)c4ccccc4)cc3)c2cc1NC(=O)/C=C/CN1CCN(C)CC1	6.5376	601.247	9	3	4.315	TRUE
CHEMBL596964	295.4	nM	COc1cc2ncnc(NCc3ccc(F)cc3)c2cc1OCCCCCCC(=O)NO	6.52959	442.202	7	3	4.2243	TRUE
CHEMBL3133824	298	nM	O=S(=O)(c1ccc2[nH]c3nccc(Nc4cccc(O)c4)c3c2c1)N1CCOCC1	6.52578	424.121	6	3	3.1862	TRUE
CHEMBL114593	300	nM	COCC#CC(=O)Nc1ccc2ncc(C#N)c(Nc3cccc(Br)c3)c2c1	6.52288	434.038	5	2	4.20088	TRUE
CHEMBL202621	300	nM	O=C(C#CCN1CCOCC1)Nc1ccc2ncnc(Nc3ccc(F)c(Cl)c3)c2c1	6.52288	439.121	6	2	3.44	TRUE
CHEMBL94061	301	nM	CN(C)C/C=C/C(=O)Nc1ccc2ncnc(Nc3cccc(Br)c3)c2c1	6.52143	425.085	5	2	4.1922	TRUE
CHEMBL15202	309	nM	COc1ccc2ncnc(Nc3ccc(OCc4ccccc4)cc3)c2c1	6.51004	357.148	5	1	4.961	TRUE
CHEMBL398388	310	nM	NC(=O)C1CCN(Cc2ccn3ncnc(Nc4ccc5c(cnn5Cc5cccc(F)c5)c4)c23)CC1	6.50864	498.229	8	2	3.7073	TRUE
CHEMBL3133823	310	nM	Clc1ccc(Nc2ccnc3[nH]c4ccccc4c23)cc1	6.50864	293.072	2	2	5.1131	TRUE
CHEMBL394462	310	nM	Cc1ccn2ncnc(Nc3ccc4c(cnn4Cc4ccccn4)c3)c12	6.50864	355.155	7	1	3.57432	TRUE
CHEMBL1683966	318	nM	Cc1ncnc(Nc2ccc(OCc3cccc(F)c3)c(Cl)c2)c1/C=C/C(=O)NCCN1CCOCC1	6.49757	525.194	7	2	4.36172	TRUE
CHEMBL2441565	319	nM	CN(C)C/C=C/C(=O)N1CCOc2cc3ncnc(Nc4ccc(F)c(Cl)c4)c3cc21	6.49621	441.137	6	1	4.0091	TRUE
CHEMBL4741020	321	nM	C=CC(=O)Nc1cccc(-c2c(-c3ccc(N4CCN(C)CC4)cc3)[nH]c3ncn(CC(C)C)c(=O)c23)c1	6.49349	510.274	6	2	4.5909	TRUE
CHEMBL3357635	324.4	nM	COc1cc2ncnc(Nc3ccc(F)c(Cl)c3)c2cc1NC(=O)/C(F)=C/CN1CCCCC1	6.48892	487.159	6	2	5.4523	TRUE
CHEMBL3114701	330	nM	C#Cc1cccc(Nc2ncnc3cc4c(cc23)N(C(=O)/C=C/CN2CCC(C)CC2)CCO4)c1	6.48149	467.232	6	1	4.3682	TRUE
CHEMBL4468924	337	nM	CC1CCN(C/C=C/C(=O)N2CCOc3cc4ncnc(Nc5ccc(F)c(Cl)c5)c4cc32)CC1	6.47237	495.184	6	1	5.1794	TRUE
CHEMBL4445017	344	nM	O=C(/C=C/CN1CCCCC1)N1CCOc2cc3ncnc(Nc4ccc(F)c(Cl)c4)c3cc21	6.46344	481.168	6	1	4.9334	TRUE
CHEMBL540701	347	nM	C=CCOc1ccc2ncnc(Nc3ccc(OCc4ccccc4)cc3)c2c1	6.45967	383.163	5	1	5.5172	TRUE
CHEMBL258352	350	nM	CN1CCN(C(=O)COc2cccc3ncnc(Nc4ccc(OCc5ccccn5)c(Cl)c4)c23)CC1	6.45593	518.183	8	1	4.1536	TRUE
CHEMBL592466	350	nM	Oc1ccc(CN(Cc2cccc(Cl)c2O)C(=S)Nc2ccccc2)cc1	6.45593	398.086	3	3	5.1504	TRUE
CHEMBL1614707	350	nM	FC(F)(F)c1ccc(/C=C/c2nc(COc3ccc(CCCCn4ccnn4)cc3)co2)cc1	6.45593	468.177	6	0	6.0572	TRUE
CHEMBL602728	350	nM	O=C(Nc1cccc2ccccc12)c1ccc(N(CCCl)CCCl)cc1	6.45593	386.095	2	1	5.3761	TRUE
CHEMBL5170804	357	nM	Cc1ccc(-c2c(CN3CCOCC3)nc3scc(C(=O)NN)n23)cc1	6.44733	371.142	7	2	1.80692	TRUE
CHEMBL252246	359	nM	O=C(NO)[C@H]1CC2(CC2)CN[C@@H]1C(=O)N1CCC(c2ccccc2)C1	6.44491	343.19	4	3	1.2662	TRUE
CHEMBL201684	360	nM	C#CCCCn1c(Sc2cc(OC)ccc2I)nc2c(N)nc(F)nc21	6.4437	483.003	7	1	3.7254	TRUE
CHEMBL1645464	360	nM	Cn1ncc2cc(Nc3ncnn4ccc(CN5CCC(N)CC5)c34)ccc21	6.4437	376.212	8	2	2.2827	TRUE
CHEMBL391675	360	nM	Fc1cccc(Cn2ncc3cc(Nc4ncnn5ccc(CN6CCCC6)c45)ccc32)c1	6.4437	441.208	7	1	4.6058	TRUE
CHEMBL2408052	360	nM	CNC(=O)CN1CCC(Oc2cc3c(Nc4cccc(Cl)c4)ncnc3cc2OC)CC1	6.4437	455.172	7	2	3.6246	TRUE
CHEMBL379892	370	nM	COc1ccc(I)c(Sc2nc3c(N)ncnc3n2CCC=C(C)C)c1	6.4318	481.043	7	1	4.5292	TRUE
CHEMBL3133832	376	nM	O=S(=O)(c1ccc2[nH]c3nccc(Nc4cccc(O)c4)c3c2c1)N1CCN(CCO)CC1	6.42481	467.163	7	4	2.4639	TRUE
CHEMBL91867	378	nM	CC#CC(=O)Nc1ccc2ncnc(Nc3cccc(Br)c3)c2c1	6.42251	380.027	4	2	4.0977	TRUE
CHEMBL326280	380	nM	COCC#CC(=O)Nc1cc2c(Nc3cccc(Br)c3)c(C#N)cnc2cc1OC	6.42022	464.048	6	2	4.20948	TRUE
CHEMBL396079	380	nM	c1ccc(Cn2ncc3cc(Nc4ncnn5ccc(COC[C@@H]6CNCCO6)c45)ccc32)nc1	6.42022	470.218	10	2	2.7709	TRUE
CHEMBL414631	380	nM	COCOC#CC(=O)Nc1ccc2ncc(C#N)c(Nc3cccc(Br)c3)c2c1	6.42022	450.033	6	2	4.13248	TRUE
CHEMBL4458843	384	nM	CC1CCCCN1C/C=C/C(=O)N1CCOc2cc3ncnc(Nc4ccc(F)c(Cl)c4)c3cc21	6.41567	495.184	6	1	5.3219	TRUE
CHEMBL3929484	386.1	nM	O=C(CCCCCn1cc(-c2ccc3ncnc(Nc4cccc(Cl)c4F)c3c2)nn1)NO	6.4133	469.143	8	3	4.4902	TRUE
CHEMBL4166412	390	nM	NS(=O)(=O)c1ccc(-n2c(SCC(=O)Nc3cnc4ccccc4c3)nc3cc4ccccc4cc3c2=O)cc1	6.40894	567.103	8	2	4.4653	TRUE
CHEMBL3133828	390	nM	COc1cccc(Nc2ccnc3[nH]c4ccc(S(=O)(=O)N5CCNCC5)cc4c23)c1	6.40894	437.152	6	3	3.0622	TRUE
CHEMBL425738	390	nM	CCOC(=O)c1cc2c(Nc3ccc4c(cnn4Cc4ccccc4)c3)ncnn2c1	6.40894	412.165	8	1	4.0476	TRUE
CHEMBL3934034	404	nM	CCC(=O)Nc1cc2c(Nc3ccc(OCc4ccccc4)cc3)ncnc2cc1OC	6.39362	428.185	6	2	5.3095	TRUE
CHEMBL3930316	406	nM	CCC(=O)Nc1cc2c(Nc3ccc(F)c(Cl)c3)ncnc2cc1OC	6.39147	374.095	5	2	4.523	TRUE
CHEMBL589588	410	nM	COc1ccc(NC(=O)c2ccc(N(CCCl)CCCl)cc2)cc1	6.38722	366.09	3	1	4.2315	TRUE
CHEMBL2408048	410	nM	COc1cc2ncnc(Nc3cccc(Cl)c3F)c2cc1OC1CCN(CC(=O)NC(C)C)CC1	6.38722	501.194	7	2	4.5423	TRUE
CHEMBL247127	410	nM	c1cncc(Cn2ncc3cc(Nc4ncnn5ccc(COC[C@@H]6CNCCO6)c45)ccc32)c1	6.38722	470.218	10	2	2.7709	TRUE
CHEMBL3930965	413	nM	COc1cc2ncnc(Nc3ccc(Cc4ccccn4)cc3)c2cc1NC(=O)/C=C/CN1CCCC1	6.38405	494.243	7	2	4.9583	TRUE
CHEMBL93783	414	nM	CN(C/C=C/C(=O)Nc1ccc2ncnc(Nc3cccc(Br)c3)c2c1)CCO	6.383	455.096	6	3	3.5547	TRUE
CHEMBL3943512	419	nM	CCC(=O)Nc1cc2c(Nc3ccc(Oc4ccccc4)cc3)ncnc2cc1OC	6.37779	414.169	6	2	5.5228	TRUE
CHEMBL592457	420	nM	O=C1CSC(N/N=C/c2cc(Br)ccc2O)=N1	6.37675	312.952	5	2	1.7076	TRUE
CHEMBL246489	420	nM	COCCOCc1ccn2ncnc(Nc3ccc4c(cnn4Cc4cccc(F)c4)c3)c12	6.37675	446.187	8	1	4.173	TRUE
CHEMBL394056	420	nM	COCc1ccn2ncnc(Nc3ccc4c(cnn4Cc4cccc(F)c4)c3)c12	6.37675	402.16	7	1	4.1564	TRUE
CHEMBL247101	430	nM	Cc1ccn2ncnc(Nc3ccc(OCc4cccc(F)c4)c(Cl)c3)c12	6.36653	382.1	5	1	5.15282	TRUE
CHEMBL255236	435	nM	COc1ccccc1CO/N=C/c1c(N)ncnc1Nc1ccc2c(cnn2Cc2cccc(F)c2)c1	6.36151	497.198	9	2	4.8988	TRUE
CHEMBL5207091	440	nM	Cc1ccccc1NCc1coc(/C=C/c2ccc(C(F)(F)F)cc2)n1	6.35655	358.129	3	1	5.78432	TRUE
CHEMBL257859	440	nM	Clc1cc(Nc2ncnc3[nH]nc(OCCCN4CCOCC4)c23)ccc1OCc1ccccn1	6.35655	495.179	9	2	3.825	TRUE
CHEMBL449949	450	nM	O=C(O[C@H]1CN[C@H](C#Cc2cc3ncnc(Nc4ccc(OCc5cccc(F)c5)nc4)c3s2)C1)N1CCOCC1	6.34679	574.18	10	2	4.0988	TRUE
CHEMBL115440	450	nM	COCCOCC#CC(=O)Nc1ccc2ncc(C#N)c(Nc3cccc(Br)c3)c2c1	6.34679	478.064	6	2	4.21748	TRUE
CHEMBL3961532	458	nM	CCC(=O)Nc1cc2c(Nc3ccc(OCc4cccc(F)c4)c(Cl)c3)ncnc2cc1OC	6.33913	480.136	6	2	6.102	TRUE
CHEMBL94066	458	nM	C=C(CN1CCOCC1)C(=O)Nc1ccc2ncnc(Nc3cccc(Br)c3)c2c1	6.33913	467.096	6	2	3.9628	TRUE
CHEMBL202398	464	nM	CCCCN(CC#CC(=O)Nc1ccc2ncnc(Nc3ccc(F)c(Cl)c3)c2c1)CCCC	6.33348	481.204	5	2	6.01	TRUE
CHEMBL496212	470	nM	O=C(NO)[C@H]1CCCC[C@@H]1C(=O)N1CCN(c2ccccc2)CC1	6.3279	331.19	4	2	1.647	TRUE
CHEMBL500591	470	nM	N#Cc1c(N)ncnc1Nc1ccc(OCc2ccccc2)c(Cl)c1	6.3279	351.089	6	2	3.90648	TRUE
CHEMBL596957	478.2	nM	COc1cc2ncnc(NCc3ccc(Cl)c(F)c3)c2cc1OCCCCCCC(=O)NO	6.32039	476.163	7	3	4.8777	TRUE
CHEMBL4443188	482.1	nM	COC[C@H](C)Oc1cc2ncnc(Nc3ccc(F)c(Cl)c3)c2cc1NC(=O)/C=C/CN(C)C	6.31686	487.179	7	2	4.6359	TRUE
CHEMBL258694	500	nM	Cc1nnc(-c2cn3ncnc(Nc4cnc5[nH]ccc5c4)c3c2C(C)C)o1	6.30103	374.16	8	2	3.83102	TRUE
CHEMBL372293	500	nM	CCc1c(C(=O)N(C)C)cn2ncnc(Nc3ccc4c(cnn4Cc4ccccc4)c3)c12	6.30103	439.212	7	1	4.1351	TRUE
CHEMBL3957801	509	nM	CCC(=O)Nc1cc2c(Nc3ccc(F)c(Cl)c3)ncnc2cc1OCCCN1CCOCC1	6.29328	487.179	7	2	4.6155	TRUE
CHEMBL3746557	510	nM	CC(=O)N1N=C(c2ccc(C(F)(F)F)cc2)CC1c1ccc(C(=O)OCCn2c([N+](=O)[O-])cnc2C)cc1	6.29243	529.157	8	0	4.67312	TRUE
CHEMBL397122	510	nM	C[C@@H](c1cccc(F)c1)n1ncc2cc(Nc3ncnn4ccc(COC[C@@H]5CNCCO5)c34)ccc21	6.29243	501.229	9	2	4.076	TRUE
CHEMBL3936761	530	nM	C=CC(=O)N1CCC([C@@H]2CCNc3c(C(N)=O)c(-c4ccc(Oc5ccccc5)cc4)nn32)CC1	6.27572	471.227	6	2	4.2226	TRUE
CHEMBL230680	550	nM	COCC(=O)NCC#Cc1ccc2ncnc(Nc3ccc(OC4CCN(C(=O)C5CCCO5)CC4)c(C)c3)c2c1	6.25964	557.264	8	2	3.34472	TRUE
CHEMBL2408054	550	nM	CNC(=O)CCN1CCC(Oc2cc3c(Nc4cccc(Cl)c4F)ncnc3cc2OC)CC1	6.25964	487.179	7	2	4.1538	TRUE
CHEMBL3904205	556	nM	CCC(=O)Nc1cc2c(Nc3ccc4c(c3)CCN4Cc3ccccc3)ncnc2cc1OC	6.25493	453.216	6	2	5.2932	TRUE
CHEMBL598407	556.9	nM	COc1cc2ncnc(N[C@@H](C)c3ccc(Cl)cc3)c2cc1OCCCCCCC(=O)NO	6.25422	472.188	7	3	5.2996	TRUE
CHEMBL402149	557	nM	CO/N=C/c1c(N)ncnc1Nc1cccc(Br)c1	6.25414	321.023	6	2	2.5452	TRUE
CHEMBL1928945	559	nM	Nc1cccc(Oc2cc(Nc3ccc(OCc4cccc(F)c4)c(Cl)c3)ncn2)c1	6.25259	436.11	6	2	5.9662	TRUE
CHEMBL246493	560	nM	Fc1cccc(COc2ccc(Nc3ncnn4ccc(COC[C@@H]5CNCCO5)c34)cc2Cl)c1	6.25181	497.163	8	2	4.3494	TRUE
CHEMBL245868	560	nM	CN(C)CCCOCc1ccn2ncnc(Nc3ccc4c(cnn4Cc4cccc(F)c4)c3)c12	6.25181	473.234	8	1	4.4783	TRUE
CHEMBL3133829	576	nM	CCOc1cccc(Nc2ccnc3[nH]c4ccc(S(=O)(=O)N5CCNCC5)cc4c23)c1	6.23958	451.168	6	3	3.4523	TRUE
CHEMBL246492	590	nM	Fc1cccc(Cn2ncc3cc(Nc4ncnn5ccc(COC[C@@H]6COCCN6)c45)ccc32)c1	6.22915	487.213	9	2	3.515	TRUE
CHEMBL3828021	590	nM	C#Cc1cccc(Nc2ncnc3ccc(-c4cnn(C)c4)cc23)c1	6.22915	325.133	5	1	3.7552	TRUE
CHEMBL2205030	590	nM	O=S1(=O)N=S(c2ccc(Br)cc2)c2ccncc21	6.22915	341.913	3	0	2.7663	TRUE
CHEMBL4759651	592	nM	C=CC(=O)Nc1cccc(-c2c(-c3ccc(N4CCN(C)CC4)cc3)[nH]c3ncn(C(C)C)c(=O)c23)c1	6.22768	496.259	6	2	4.5158	TRUE
CHEMBL202425	597	nM	CCN(CC)CC#CC(=O)Nc1cc2c(Nc3ccc(F)c(Cl)c3)ncnc2cn1	6.22403	426.137	6	2	3.8446	TRUE
CHEMBL231885	610	nM	CC(=O)N1CCN(Cc2ccn3ncnc(Nc4ccc5c(cnn5Cc5cccc(F)c5)c4)c23)CC1	6.21467	498.229	8	1	3.6741	TRUE
CHEMBL4103370	610	nM	Clc1ccc(-c2nnc(Cc3nc4ccccc4[nH]3)o2)cc1	6.21467	310.062	4	1	3.8571	TRUE
CHEMBL1080272	620	nM	O=C(NCCN1CCCC1)c1cc2cnnc(Nc3ccc(OCc4cccc(F)c4)c(Cl)c3)c2[nH]1	6.20761	508.179	6	3	4.8986	TRUE
CHEMBL4759405	633.7	nM	Cc1ccc(C2=N/C(=C/c3ccc(Cl)cc3)C(=O)NN2C(=O)Cc2nc3c(c(C)nn3-c3ccccc3)c(=O)[nH]2)cc1	6.19812	577.163	7	2	4.28284	TRUE
CHEMBL442754	634	nM	COCCN(C)C/C=C/C(=O)Nc1ccc2ncnc(Nc3cccc(Br)c3)c2c1	6.19791	469.111	6	2	4.2088	TRUE
CHEMBL3968839	642	nM	CCC(=O)Nc1cc2c(Nc3ccc4c(ccn4Cc4ccccn4)c3)ncnc2cc1OC	6.19246	452.196	7	2	5.1285	TRUE
CHEMBL604042	660	nM	Oc1ccc(CN(Cc2cccc(Br)c2O)C(=S)Nc2ccccc2)cc1	6.18046	442.035	3	3	5.2595	TRUE
CHEMBL2408049	670	nM	COc1cc2ncnc(Nc3cccc(Cl)c3F)c2cc1OC1CCN(CC(=O)N(C)C)CC1	6.17393	487.179	7	1	4.1059	TRUE
CHEMBL4549542	674	nM	CN1CCN(C/C=C/C(=O)N2CCOc3cc4ncnc(Nc5ccc(F)c(Cl)c5)c4cc32)CC1	6.17134	496.179	7	1	3.6949	TRUE
CHEMBL3828269	676	nM	Cn1cc(-c2ccc3ncnc(Nc4ccc(F)c(Cl)c4)c3c2)cn1	6.17005	353.084	5	1	4.5664	TRUE
CHEMBL372692	680	nM	CCc1c(CC(=O)O)cn2ncnc(Nc3ccc4c(cnn4Cc4ccccc4)c3)c12	6.16749	426.18	7	2	4.0604	TRUE
CHEMBL3133830	689	nM	COc1cccc(Nc2ccnc3[nH]c4ccc(S(=O)(=O)N5CCN(CCO)CC5)cc4c23)c1	6.16178	481.178	7	3	2.7669	TRUE
CHEMBL3633775	706	nM	NC(=O)Nc1ccc2ncnc(Nc3ccc(Oc4ccc(Cl)c(Cl)c4)c(Cl)c3)c2c1	6.1512	473.021	5	3	6.6165	TRUE
CHEMBL479800	709	nM	Fc1cccc(COc2ccc(Nc3ncnc4cc(-c5ccco5)sc34)cc2Cl)c1	6.14935	451.056	6	1	7.0664	TRUE
CHEMBL1421	710	nM	Cc1nc(Nc2ncc(C(=O)Nc3c(C)cccc3Cl)s2)cc(N2CCN(CCO)CC2)n1	6.14874	487.156	9	3	3.31354	TRUE
CHEMBL458997	710	nM	CNC(=O)c1ccccc1Nc1nc(Nc2ccc(N3CCOCC3)cc2OC)ncc1Cl	6.14874	468.168	8	3	3.822	TRUE
CHEMBL1922903	720	nM	N#Cc1ccc(Oc2ccc(Nc3ncnc4cc[nH]c34)cc2Cl)cc1	6.14267	361.073	5	2	5.01888	TRUE
CHEMBL373025	730	nM	CCc1c(CO)cn2ncnc(Nc3ccc4c(cnn4Cc4ccccc4)c3)c12	6.13668	398.186	7	2	3.9256	TRUE
CHEMBL419501	733	nM	COC[C@H]1CCCN1C/C=C/C(=O)Nc1ccc2ncnc(Nc3cccc(Br)c3)c2c1	6.1349	495.127	6	2	4.7414	TRUE
CHEMBL521284	733	nM	c1ccc(Oc2ccc(Nc3ccnc4ccccc34)cc2)cc1	6.1349	312.126	3	1	5.7707	TRUE
CHEMBL1683958	740	nM	Cc1ncnc(Nc2ccc(OCc3cccc(F)c3)c(Cl)c2)c1/C=N/OCCN1CCOCC1	6.13077	499.179	8	1	4.58282	TRUE
CHEMBL233324	750	nM	O=C1CCN(Cc2ccn3ncnc(Nc4ccc5c(cnn5Cc5cccc(F)c5)c4)c23)CCN1	6.12494	484.214	8	2	3.3319	TRUE
CHEMBL1934621	750	nM	Cc1ncnc(Nc2ccc(OCc3cccc(F)c3)c(Cl)c2)c1C#Cc1ccccc1	6.12494	443.12	4	1	6.29992	TRUE
CHEMBL553	760	nM	C#Cc1cccc(Nc2ncnc3cc(OCCOC)c(OCCOC)cc23)c1	6.11919	393.169	7	1	3.4051	TRUE
CHEMBL512391	776	nM	Nc1ncnc(Nc2ccc(OCc3ccccc3)c(Cl)c2)c1C(=O)O	6.11014	370.083	6	3	3.733	TRUE
CHEMBL461114	776	nM	Nc1ncnc(Nc2ccc(OCc3ccccc3)c(Cl)c2)c1C(=O)Nc1ccccc1	6.11014	445.131	6	3	5.2871	TRUE
CHEMBL379093	780	nM	Fc1cccc(COc2ccc(Nc3ncncc3C#Cc3ccccc3)cc2Cl)c1	6.10791	429.104	4	1	5.9915	TRUE
CHEMBL3964380	782	nM	CCC(=O)Nc1cc2c(Nc3ccc4c(ccn4Cc4ccco4)c3)ncnc2cc1OC	6.10679	441.18	7	2	5.3265	TRUE
CHEMBL3970738	798	nM	CCC(=O)Nc1cc2c(Nc3ccc(NS(=O)(=O)c4ccccc4)cc3)ncnc2cc1OC	6.098	477.147	7	3	4.5313	TRUE
CHEMBL3963723	800	nM	CCC(=O)Nc1cc2c(Nc3ccc4[nH]ccc4c3)ncnc2cc1OC	6.09691	361.154	5	3	4.2118	TRUE
CHEMBL3925158	815	nM	CCC(=O)Nc1cc2c(Nc3ccc(OCc4ccccn4)cc3)ncnc2cc1OC	6.08884	429.18	7	2	4.7045	TRUE
CHEMBL5201807	820	nM	Cc1cccc(-c2ccc3c(ccn3Cc3coc(/C=C/c4ccc(C(F)(F)F)cc4)n3)c2)c1	6.08619	458.161	3	0	7.84222	TRUE
CHEMBL194349	820	nM	CCOC(=O)c1cn2ncnc(Nc3ccc(Oc4ccccc4)cc3)c2c1CC	6.08619	402.169	7	1	5.0043	TRUE
CHEMBL1082012	843	nM	Cc1c(C(=O)NCCN2CCN(C)CC2)[nH]c2cnnc(Nc3ccc(OCc4cccc(F)c4)c(Cl)c3)c12	6.07417	551.221	7	3	4.35862	TRUE
CHEMBL245277	850	nM	C[C@@H](c1ccccc1)n1ncc2cc(Nc3ncnn4ccc(COC[C@@H]5CNCCO5)c34)ccc21	6.07058	483.238	9	2	3.9369	TRUE
CHEMBL3633941	855	nM	CCNC(=O)Nc1ccc(C(=O)Nc2ccc3ncnc(Nc4ccc(F)c(Cl)c4)c3c2)cc1	6.06803	478.132	5	4	5.5596	TRUE
CHEMBL2408053	860	nM	CNC(=O)CN1CCC(Oc2cc3c(Nc4cc(Cl)ccc4F)ncnc3cc2OC)CC1	6.0655	473.163	7	2	3.7637	TRUE
CHEMBL5189871	860	nM	Cc1cccc(NCc2coc(/C=C/c3ccc(C(F)(F)F)cc3)n2)c1	6.0655	358.129	3	1	5.78432	TRUE
CHEMBL4753913	865.7	nM	COc1ccc(/C=C2/N=C(c3ccc(Cl)cc3)N(C(=O)Cc3nc4c(c(C)nn4-c4ccccc4)c(=O)[nH]3)NC2=O)cc1	6.06263	593.158	8	2	3.98302	TRUE
CHEMBL4790553	872.3	nM	Cc1nn(-c2ccccc2)c2nc(CC(=O)N3NC(=O)/C(=C\c4ccccc4)N=C3c3ccccc3)[nH]c(=O)c12	6.05933	529.186	7	2	3.32102	TRUE
CHEMBL3828079	874	nM	Cn1cc(-c2ccc3ncnc(Nc4ccc5ncccc5c4)c3c2)cn1	6.05849	352.144	6	1	4.3221	TRUE
CHEMBL2325087	880	nM	NC(=S)N1N=C(c2ccc(Cl)c(Cl)c2)CC1c1ccc2ccccc2c1	6.05552	399.036	2	1	5.5413	TRUE
CHEMBL1645468	880	nM	CC(C)Nc1ncnn2ccc(CN3CCC(N)CC3)c12	6.05552	288.206	6	2	1.4727	TRUE
CHEMBL3960911	897	nM	CCC(=O)Nc1cc2c(Nc3ccc4c(c3)CCN4Cc3ccccn3)ncnc2cc1OC	6.04721	454.212	7	2	4.6882	TRUE
CHEMBL4084249	910	nM	COc1ccc(-c2nnc(Cc3nc4ccccc4[nH]3)o2)cc1	6.04096	306.112	5	1	3.2123	TRUE
CHEMBL3114699	930	nM	C#Cc1cccc(Nc2ncnc3cc4c(cc23)N(C(=O)/C=C/CN2CCOCC2)CCO4)c1	6.03152	455.196	7	1	2.9685	TRUE
CHEMBL1080990	934	nM	CCOC(=O)c1[nH]c(C)c2cnnc(Nc3ccc(OCc4cccc(F)c4)c(Cl)c3)c12	6.02965	454.121	6	2	5.55812	TRUE
CHEMBL3923650	958	nM	CCC(=O)Nc1cc2c(Nc3ccc(NS(=O)(=O)c4ccccc4)nc3)ncnc2cc1OC	6.01863	478.142	8	3	3.9263	TRUE
CHEMBL477197	960	nM	Oc1cc2c(cc1O)[C@@H]1c3ccc(O)c(O)c3OC[C@]1(O)C2	6.01773	302.079	6	5	1.3205	TRUE
CHEMBL3133817	978	nM	CC(=O)c1ccc2[nH]c3nccc(Nc4cccc([N+](=O)[O-])c4)c3c2c1	6.00966	346.107	5	2	4.5705	TRUE
CHEMBL3133820	978	nM	Cc1ccccc1Nc1ccnc2[nH]c3ccccc3c12	6.00966	273.127	2	2	4.76812	TRUE
CHEMBL2441561	996	nM	O=C(/C=C/CN1CCOCC1)N1CCOc2cc3ncnc(Nc4ccc(F)c(Cl)c4)c3cc21	6.00174	483.147	7	1	3.7797	TRUE
CHEMBL3921390	1000	nM	COc1cc2c(Nc3ccc(Cl)c(Cl)c3C)ncnc2cc1OCC1CN(C)CCO1	6	462.123	7	1	4.70662	TRUE
CHEMBL3921861	1000	nM	COc1cc2c(Nc3ccc(Br)c(Cl)c3)ncnc2cc1O[C@H]1CO[C@H]2[C@@H]1OC[C@@H]2N1CCOCC1	6	576.078	9	1	4.0437	TRUE
CHEMBL4568087	1000	nM	Cn1cc(-c2cnc3c(-c4csc(C(=O)N[C@@H]5CCCC[C@@H]5N)c4)cnn3c2)cn1	6	421.168	8	2	2.858	TRUE
CHEMBL1917092	1000	nM	COC(=O)c1ccc2c(c1)S(=O)(=O)N=S2c1ccc(Br)cc1	6	398.923	4	0	3.1579	TRUE
CHEMBL3986082	1000	nM	COc1cc2c(Nc3ccc(Br)c(Cl)c3)ncnc2cc1O[C@@H]1CO[C@H]2[C@@H]1OC[C@@H]2OS(C)(=O)=O	6	584.997	10	1	3.6877	TRUE
CHEMBL3909603	1000	nM	COc1cc2c(Nc3ccc(Cl)c(Cl)c3F)ncnc2cc1OC[C@@H]1CN(C)CC(=O)N1C	6	493.108	7	1	3.9791	TRUE
CHEMBL3891130	1000	nM	COc1cc2c(Nc3ccc(Br)c(Cl)c3F)ncnc2cc1OC[C@@H]1CN(C)CC(=O)N1C	6	537.058	7	1	4.0882	TRUE
CHEMBL3891059	1000	nM	COc1cc2c(Nc3ccc(C)c(Cl)c3Cl)ncnc2cc1OCC1CN(C)CCO1	6	462.123	7	1	4.70662	TRUE
CHEMBL3985116	1000	nM	COc1cc2c(Nc3ccc(Cl)c(Cl)c3N3CCN(C)CC3)ncnc2cc1O[C@H]1CO[C@H]2[C@@H]1OC[C@@H]2F	6	563.15	9	1	4.3237	TRUE
CHEMBL3890300	1000	nM	COc1cc2c(Nc3ccc(N4CCN(C)C(F)C4)cc3)ncnc2cc1O[C@H]1CO[C@H]2[C@@H]1OC[C@@H]2F	6	513.219	9	1	3.3125	TRUE
CHEMBL3895458	1000	nM	COc1cc2c(Nc3cccc(Br)c3C)ncnc2cc1O[C@H]1CO[C@H]2[C@@H]1OC[C@@H]2OC	6	501.09	8	1	4.01292	TRUE
CHEMBL3929354	1000	nM	COc1cc2c(Nc3ccc(Br)c(Cl)c3)ncnc2cc1O[C@H]1CO[C@H]2[C@@H]1OC[C@H]2OC	6	521.035	8	1	4.3579	TRUE
CHEMBL3893058	1000	nM	COc1cc2c(Nc3ccc(N4CCN(C)CC4)c(Cl)c3Cl)ncnc2cc1O[C@H]1CO[C@H]2[C@@H]1OC[C@@H]2F	6	563.15	9	1	4.3237	TRUE
CHEMBL3971560	1000	nM	COc1cc2c(Nc3ccc(Br)c(Cl)c3)ncnc2cc1OC1CCN(C)C1	6	462.046	6	1	4.8808	TRUE
CHEMBL3924442	1000	nM	COc1cc2c(Nc3ccc(N4CCN(C)CC4)cc3)ncnc2cc1O[C@H]1CO[C@H]2[C@@H]1OC[C@@H]2F	6	495.228	9	1	3.0169	TRUE
CHEMBL3959160	1000	nM	COc1cc2c(Nc3cccc(Cl)c3C)ncnc2cc1O[C@H]1CO[C@H]2[C@@H]1OC[C@@H]2OC	6	457.14	8	1	3.90382	TRUE
CHEMBL539947	1000	nM	CC(C)(C)c1cc(/C=C(\C#N)C(N)=S)cc(C(C)(C)C)c1O	6	316.161	3	2	4.18028	TRUE
CHEMBL3961417	1000	nM	COc1cc2c(Nc3ccc(Br)c(Cl)c3)ncnc2cc1O[C@H]1CO[C@H]2[C@@H]1OC[C@@H]2NC(C)=O	6	548.046	8	2	3.8476	TRUE
CHEMBL5187554	1000	nM	CC#CC(=O)N1CCC[C@H]1n1nc(-c2ccc(C(=O)Nc3ccccn3)cc2)c2c(N)ncnc21	6	466.187	8	2	2.8671	TRUE
CHEMBL3972940	1000	nM	COc1cc2c(Nc3ccc(Br)c(Cl)c3)ncnc2cc1O[C@H]1CO[C@H]2[C@@H]1OC[C@@H]2N1CCN(C)CC1	6	589.109	9	1	3.9589	TRUE
CHEMBL3976788	1000	nM	COc1cc2c(Nc3ccc(Br)c(Cl)c3)ncnc2cc1O[C@H]1CO[C@H]2[C@@H]1OC[C@@H]2N	6	506.036	8	2	3.6702	TRUE
CHEMBL3707348	1000	nM	CC#CC(=O)N1CCC[C@H]1c1nc(-c2ccc(C(=O)Nc3ccccn3)cc2)c2c(N)nccn12	6	465.191	7	2	3.3126	TRUE
CHEMBL3923645	1000	nM	COc1cc2c(Nc3ccc(Br)c(Cl)c3)ncnc2cc1O[C@H]1CO[C@H]2[C@@H]1OC[C@@H]2N1CCCC1	6	560.083	8	1	4.8073	TRUE
CHEMBL3945072	1000	nM	COc1cc2c(Nc3ccc(Cl)c(Cl)c3F)ncnc2cc1OC[C@@H]1CN2CCC[C@@H]2C(=O)N1	6	505.108	7	2	4.1695	TRUE
CHEMBL3967530	1000	nM	COc1cc2ncnc(NCc3ccc(F)c(Cl)c3)c2cc1OCCCCCCC(=O)NO	6	476.163	7	3	4.8777	TRUE
CHEMBL3910297	1000	nM	C[C@@H](Nc1ncnc2[nH]c(-c3ccc(CNCC(=O)NO)cc3)cc12)c1ccccc1	6	416.196	6	5	3.393	TRUE
CHEMBL3940489	1000	nM	COc1cc2c(Nc3ccc(Cl)c(Cl)c3F)ncnc2cc1OC[C@@H]1CN2CCCC[C@H]2C(=O)N1	6	519.124	7	2	4.5596	TRUE
CHEMBL3900059	1000	nM	COc1cc2c(Nc3ccc(Cl)c(Cl)c3F)ncnc2cc1OC[C@@H]1CN2CCCC[C@@H]2C(=O)N1	6	519.124	7	2	4.5596	TRUE
CHEMBL3986135	1000	nM	COc1cc2c(Nc3ccc(Br)c(Cl)c3F)ncnc2cc1OC[C@@H]1CN2CCC[C@H]2C(=O)N1	6	549.058	7	2	4.2786	TRUE
CHEMBL3985004	1000	nM	O=C(CCCCCCOc1ccc(-c2cc3c(NCc4ccccc4)ncnc3[nH]2)cc1)NO	6	459.227	6	4	5.0717	TRUE
CHEMBL3983466	1000	nM	COc1cc2c(Nc3ccc(Cl)c(Cl)c3F)ncnc2cc1OC[C@@H]1CN2CCC[C@H]2C(=O)N1C	6	519.124	7	1	4.5117	TRUE
CHEMBL3946590	1000	nM	COc1cc2c(Nc3cc(Cl)c(Br)cc3F)ncnc2cc1O[C@@H]1C[C@H]2OC[C@H](OC)[C@H]2O1	6	539.026	8	1	4.8446	TRUE
CHEMBL3955486	1000	nM	COc1cc2c(Nc3ccc(F)c(Cl)c3F)ncnc2cc1O[C@@H]1C[C@H]2OC[C@H](OC)[C@H]2O1	6	479.106	8	1	4.2212	TRUE
CHEMBL3924380	1000	nM	COc1cc2c(Nc3cc(Cl)c(Cl)cc3F)ncnc2cc1O[C@@H]1C[C@H]2OC[C@H](OC)[C@H]2O1	6	495.076	8	1	4.7355	TRUE
CHEMBL3905501	1000	nM	COc1cc2c(Nc3ccc(Br)c(Cl)c3Cl)ncnc2cc1OC[C@@H]1CN2CCOC[C@H]2CO1	6	568.028	8	1	4.9297	TRUE
CHEMBL400858	1000	nM	Cc1cccc2[nH]c(-c3n[nH]c4ncc(-c5cncc6ccccc56)cc34)nc12	6	376.144	4	2	5.02482	TRUE
CHEMBL3974328	1000	nM	CN[C@H]1CO[C@H]2[C@@H]1OC[C@@H]2Oc1cc2ncnc(Nc3ccc(Br)c(Cl)c3)c2cc1OC	6	520.051	8	2	3.9309	TRUE
CHEMBL3933359	1000	nM	COc1cc2c(Nc3ccc(Br)c(Cl)c3)ncnc2cc1O[C@H]1CO[C@H]2[C@@H]1OC[C@@H]2OC(C)=O	6	549.03	9	1	4.2746	TRUE
CHEMBL2325101	1020	nM	Clc1ccc(C2=NN(c3ccccc3)C(c3ccc4ccccc4c3)C2)cc1Cl	5.9914	416.085	2	0	7.5023	TRUE
CHEMBL2324873	1040	nM	Cc1ccc(C2=NN(C(N)=S)C(c3ccc4ccccc4c3)C2)cc1	5.98297	345.13	2	1	4.54292	TRUE
CHEMBL327023	1040	nM	N#Cc1cnc2ccc(NC(=O)C#CCN3CCSCC3)cc2c1Nc1cccc(Br)c1	5.98297	505.057	6	2	4.60328	TRUE
CHEMBL305660	1057.5	nM	CC(C)(C)c1ccc(C(=O)CCCN2CCC(OC(c3ccccc3)c3ccccc3)CC2)cc1	5.97572	469.298	3	0	7.2176	TRUE
CHEMBL1958215	1070	nM	Cc1ccc(C2=NN(C3=NC(=O)CS3)C(c3ccc(Br)cc3)C2)cc1	5.97062	413.02	4	0	4.53802	TRUE
CHEMBL5187503	1070	nM	FC(F)(F)c1ccc(/C=C/c2nc(CNc3ccccc3Br)co2)cc1	5.97062	422.024	3	1	6.2384	TRUE
CHEMBL400569	1070	nM	CCNCc1cncc(-c2cnc3[nH]nc(-c4nc5cc(N6CCN(C)CC6)ccc5[nH]4)c3c2)c1	5.97062	467.255	7	3	3.4245	TRUE
CHEMBL3908711	1100	nM	O=C(CBr)OCCn1c(=O)oc2cc3ncnc(Nc4ccc(F)c(Cl)c4)c3cc21	5.95861	493.979	8	1	4.0119	TRUE
CHEMBL2408211	1100	nM	CNC(=O)CN1CC(Oc2cc3c(Nc4cccc(Cl)c4F)ncnc3cc2OC)C1	5.95861	445.132	7	2	2.9835	TRUE
CHEMBL197525	1100	nM	COc1ccc(Nc2ncnc3cccc(OC4CCN(C)CC4)c23)cc1Cl	5.95861	398.151	6	1	4.5084	TRUE
CHEMBL464210	1100	nM	CNC(=O)c1cc(Nc2ccc(-c3nc4ccccc4s3)cc2)ccn1	5.95861	360.104	5	2	4.4615	TRUE
CHEMBL3114689	1110	nM	C#Cc1cccc(Nc2ncnc3cc4c(cc23)N(C(=O)/C=C/CN2CCN(C)CC2)CCO4)c1	5.95468	468.227	7	1	2.8837	TRUE
CHEMBL5174917	1110	nM	COc1ccc(-c2ccc3c(ccn3Cc3coc(/C=C/c4ccc(C(F)(F)F)cc4)n3)c2)cc1	5.95468	474.156	4	0	7.5424	TRUE
CHEMBL2325100	1130	nM	Cc1ccc(C2=NN(c3ccccc3)C(c3ccc4ccccc4c3)C2)cc1	5.94692	362.178	2	0	6.50392	TRUE
CHEMBL3133814	1150	nM	Clc1cccc(Nc2ccnc3[nH]c4ccc(Br)cc4c23)c1	5.9393	370.982	2	2	5.8756	TRUE
CHEMBL3133819	1150	nM	CC(=O)c1ccc2[nH]c3nccc(Nc4cccc(Cl)c4)c3c2c1	5.9393	335.083	3	2	5.3157	TRUE
CHEMBL91925	1164	nM	CCN(CC)C/C=C/C(=O)Nc1ccc2ncnc(Nc3cccc(Br)c3)c2c1	5.93405	453.116	5	2	4.9724	TRUE
CHEMBL438805	1200	nM	CCCc1c(C(=O)OCC)cn2ncnc(Nc3ccc4c(cnn4Cc4ccccc4)c3)c12	5.92082	454.212	8	1	5.0001	TRUE
CHEMBL3828092	1202	nM	Fc1ccc(Nc2ncnc3ccc(-c4cnn(C5CCNCC5)c4)cc23)cc1Cl	5.9201	422.142	6	2	4.9539	TRUE
CHEMBL117326	1210	nM	C=C(CN(C)C)C(=O)Nc1cc2c(Nc3ccc(F)c(Cl)c3)c(C#N)cnc2cc1OCC	5.91721	467.152	6	2	5.09758	TRUE
CHEMBL2324871	1210	nM	NC(=S)N1N=C(c2ccc(Br)cc2)CC1c1ccc2ccccc2c1	5.91721	409.025	2	1	4.997	TRUE
CHEMBL157128	1220	nM	COCC1CCCN1CC#CC(=O)Nc1ccc2ncc(C#N)c(Nc3cccc(Br)c3)c2c1	5.91364	517.111	6	2	4.66528	TRUE
CHEMBL591288	1230	nM	Oc1ccc(CN(Cc2cc(Cl)cc(Cl)c2O)C(=S)Nc2ccccc2)cc1	5.91009	432.047	3	3	5.8038	TRUE
CHEMBL607707	1230	nM	CCOc1cc2ncc(C#N)c(Nc3ccc(F)c(Cl)c3)c2cc1NC(=O)/C=C/CN(C)C	5.91009	467.152	6	2	5.09758	TRUE
CHEMBL3133825	1240	nM	COc1cccc(Nc2ccnc3[nH]c4ccc(S(=O)(=O)N5CCOCC5)cc4c23)c1	5.90658	438.136	6	2	3.4892	TRUE
CHEMBL2325098	1280	nM	Brc1ccc(C2=NN(c3ccccc3)C(c3ccc4ccccc4c3)C2)cc1	5.89279	426.073	2	0	6.958	TRUE
CHEMBL5186640	1290	nM	FC(F)(F)c1ccc(/C=C/c2nc(CNc3ccc(Cl)cc3)co2)cc1	5.88941	378.075	3	1	6.1293	TRUE
CHEMBL3906330	1300	nM	O=C(CBr)OCCn1c(=O)oc2cc3ncnc(Nc4ccc(F)c(F)c4)c3cc21	5.88606	478.009	8	1	3.4976	TRUE
CHEMBL3133821	1300	nM	Oc1cccc(Nc2ccnc3[nH]c4ccccc4c23)c1	5.88606	275.106	3	3	4.1653	TRUE
CHEMBL5270336	1320	nM	CN1C(=O)c2ccc(NC(=O)CSc3nc4cc5ccccc5cc4c(=O)n3-c3ccc(S(N)(=O)=O)cc3)cc2C1=O	5.87943	599.093	9	2	3.1429	TRUE
CHEMBL319244	1329	nM	O=C(/C=C/c1ccc(O)c(O)c1)OCCc1ccccc1	5.87648	284.105	4	2	2.8969	TRUE
CHEMBL4095253	1350	nM	C=CS(=O)(=O)N1CCC[C@@H]1Cn1cc(-c2ccc3c(c2)OCO3)c2c(N)ncnc21	5.86967	427.131	8	1	2.3469	TRUE
CHEMBL3827349	1350	nM	c1cnc2ccc(Nc3ncnc4ccc(-c5cnn(C6CCNCC6)c5)cc34)cc2c1	5.86967	421.201	7	2	4.7096	TRUE
CHEMBL3633933	1390	nM	CCNC(=O)Nc1ccc2ncnc(Nc3ccc(OCc4ccccn4)c(Cl)c3)c2c1	5.85699	448.141	6	3	5.1422	TRUE
CHEMBL196548	1400	nM	CCOCc1cn2ncnc(Nc3ccc4c(cnn4Cc4ccccc4)c3)c2c1CC	5.85387	426.217	7	1	4.9698	TRUE
CHEMBL589560	1410	nM	Oc1c(Cl)cccc1CN(Cc1ccc(F)cc1)C(=S)Nc1ccccc1	5.85078	400.081	2	2	5.5839	TRUE
CHEMBL92731	1428	nM	CCCN(C/C=C/C(=O)Nc1ccc2ncnc(Nc3cccc(Br)c3)c2c1)CCC	5.84527	481.148	5	2	5.7526	TRUE
CHEMBL2325099	1450	nM	COc1ccc(C2=NN(c3ccccc3)C(c3ccc4ccccc4c3)C2)cc1	5.83863	378.173	3	0	6.2041	TRUE
CHEMBL2325097	1460	nM	Clc1ccc(C2=NN(c3ccccc3)C(c3ccc4ccccc4c3)C2)cc1	5.83565	382.124	2	0	6.8489	TRUE
CHEMBL2408212	1500	nM	CNC(=O)CN(C)CCOc1cc2c(Nc3cccc(Cl)c3F)ncnc2cc1OC	5.82391	447.147	7	2	3.2311	TRUE
CHEMBL461113	1530	nM	Nc1ncnc(Nc2ccc(OCc3ccccc3)c(Cl)c2)c1C(=O)OCCN1CCOCC1	5.81531	483.167	9	2	3.5238	TRUE
CHEMBL1828862	1530	nM	Cc1ncc([N+](=O)[O-])n1CC(=O)NS(=O)(=O)c1ccc(F)cc1	5.81531	342.043	7	1	0.74392	TRUE
CHEMBL3647967	1536	nM	C=CC(=O)N[C@H]1CC[C@@H](n2nc(-c3ccc(Oc4ccccc4)cc3)c3c(N)ncnc32)CC1	5.81361	454.212	7	2	4.6537	TRUE
CHEMBL3357643	1536	nM	COc1cc2ncnc(Nc3ccc(F)c(Cl)c3)c2cc1NC(=O)/C(F)=C/CN1CCOCC1	5.81361	489.138	7	2	4.2986	TRUE
CHEMBL94068	1559	nM	O=C(/C=C/CN1CCCCC1)Nc1ccc2ncnc(Nc3cccc(Br)c3)c2c1	5.80715	465.116	5	2	5.1165	TRUE
CHEMBL3357639	1574	nM	O=C(Nc1cc2c(Nc3ccc(F)c(Cl)c3)ncnc2cc1O[C@H]1CCOC1)/C(F)=C/CN1CCOCC1	5.803	545.164	8	2	4.4577	TRUE
CHEMBL361322	1580	nM	c1ccc(Cc2nc3cc(Nc4ncnc5nn6ccccc6c45)ccc3[nH]2)cc1	5.80134	391.155	6	2	4.4882	TRUE
CHEMBL3940060	1600	nM	O=C(CCl)OCCn1c(=O)oc2cc3ncnc(Nc4ccc(F)c(Cl)c4)c3cc21	5.79588	450.03	8	1	3.8558	TRUE
CHEMBL462162	1600	nM	COc1cc(Nc2ncnc3[nH]ccc23)ccc1-c1nc2ccccc2s1	5.79588	373.1	6	2	4.9868	TRUE
CHEMBL281300	1630	nM	C=CC(=O)Nc1ccc2ncc(C#N)c(Nc3cccc(Br)c3)c2c1	5.78781	392.027	4	2	4.73708	TRUE
CHEMBL3133818	1640	nM	CC(=O)c1ccc2[nH]c3nccc(Nc4cccc(N)c4)c3c2c1	5.78516	316.132	4	3	4.2445	TRUE
CHEMBL954	1669	nM	CCN(CC)CCOc1ccc(/C(=C(/Cl)c2ccccc2)c2ccccc2)cc1	5.77754	405.186	2	0	6.5626	TRUE
CHEMBL488564	1700	nM	COc1cc2nccc(Nc3ccc(N4C(=O)c5ccc(Cl)cc5C4=O)c(C)c3)c2cc1OC	5.76955	473.114	6	1	5.75802	TRUE
CHEMBL193282	1700	nM	C#CCCCn1c(Sc2cc(OC)c(OC)c(OC)c2Cl)nc2c(N)nc(F)nc21	5.76955	451.088	9	1	3.7914	TRUE
CHEMBL2325110	1750	nM	NC(=S)N1N=C(c2ccc(F)cc2)CC1c1ccc2ccccc2c1	5.75696	349.105	2	1	4.3736	TRUE
CHEMBL14874	1778	nM	CN(CCCOc1ccc2ncnc(Nc3ccc(OCc4ccccc4)cc3)c2c1)CCS(C)(=O)=O	5.75007	520.214	8	1	4.6977	TRUE
CHEMBL592480	1780	nM	O=C1CSC(N/N=C/c2cc(Cl)ccc2O)=N1	5.74958	269.003	5	2	1.5985	TRUE
CHEMBL1683959	1800	nM	Cc1ncnc(Nc2ccc(OCc3cccc(F)c3)c(Cl)c2)c1/C=N/OCCCN1CCOCC1	5.74473	513.194	8	1	4.97292	TRUE
CHEMBL438075	1820	nM	CC(=O)Nc1ccc(C#Cc2cncnc2Nc2ccc(OCc3cccc(F)c3)c(Cl)c2)cc1	5.73993	486.126	5	2	5.9499	TRUE
CHEMBL5190408	1830	nM	Cc1ccc(NCc2coc(/C=C/c3ccc(C(F)(F)F)cc3)n2)cc1	5.73755	358.129	3	1	5.78432	TRUE
CHEMBL5204707	1840	nM	COc1ccc(NCc2coc(/C=C/c3ccc(C(F)(F)F)cc3)n2)cc1	5.73518	374.124	4	1	5.4845	TRUE
CHEMBL589561	1870	nM	Oc1c(Br)cccc1CN(Cc1ccc(F)cc1)C(=S)Nc1ccccc1	5.72816	444.031	2	2	5.693	TRUE
CHEMBL334255	1878	nM	CCCCCCCCCCCCCCCC[n+]1ccccc1.[Br-]	5.7263	383.219	0	0	3.4594	TRUE
CHEMBL601040	1880	nM	Cc1ccc(NC(=O)c2ccc(N(CCCl)CCCl)cc2)cc1	5.72584	350.095	2	1	4.53132	TRUE
CHEMBL2325095	1890	nM	c1ccc(C2=NN(c3ccccc3)C(c3ccc4ccccc4c3)C2)cc1	5.72354	348.163	2	0	6.1955	TRUE
CHEMBL1079742	1890	nM	C#Cc1cccc(Nc2ncnc3cc(OCCOC)c(OCCOC)cc23)c1.Cl	5.72354	429.146	7	1	3.8269	TRUE
CHEMBL3325473	1900	nM	COC(=O)C1=C(N)N(c2cccnc2)C2=C(C(=O)CCC2)C1c1cc2ccccc2n2nnnc12	5.72125	467.171	10	1	2.6267	TRUE
CHEMBL2325093	1910	nM	Cc1ccc(C2=NN(c3ccccc3)C(c3cccc4ccccc34)C2)cc1	5.71897	362.178	2	0	6.50392	TRUE
CHEMBL2112370	1912	nM	COC[C@@H]1CCCN1C/C=C/C(=O)Nc1ccc2ncnc(Nc3cccc(Br)c3)c2c1	5.71851	495.127	6	2	4.7414	TRUE
CHEMBL5179098	1940	nM	Fc1cccc(-c2ccc3c(ccn3Cc3coc(/C=C/c4ccc(C(F)(F)F)cc4)n3)c2)c1	5.7122	462.136	3	0	7.6729	TRUE
CHEMBL323630	1950	nM	CN(C)C/C=C/C(=O)Nc1ccc2ncc(C#N)c(Nc3ccc(F)c(Cl)c3)c2c1	5.70997	423.126	5	2	4.69888	TRUE
CHEMBL2325094	1980	nM	Clc1ccc(C2=NN(c3ccccc3)C(c3cccc4ccccc34)C2)cc1Cl	5.70333	416.085	2	0	7.5023	TRUE
CHEMBL605161	2000	nM	O=[N+]([O-])c1ccc2c(c1)S(=O)(=O)N=S2c1ccc(Br)cc1	5.69897	385.903	4	0	3.2795	TRUE
CHEMBL2325096	2010	nM	Fc1ccc(C2=NN(c3ccccc3)C(c3ccc4ccccc4c3)C2)cc1	5.6968	366.153	2	0	6.3346	TRUE
CHEMBL5183608	2010	nM	FC(F)(F)c1ccc(/C=C/c2nc(CNc3cccc(Cl)c3)co2)cc1	5.6968	378.075	3	1	6.1293	TRUE
CHEMBL58	2035.2	nM	O=C1c2c(O)ccc(O)c2C(=O)c2c(NCCNCCO)ccc(NCCNCCO)c21	5.69139	444.201	10	8	-0.1392	TRUE
CHEMBL3746473	2060	nM	CC(=O)N1N=C(c2ccc([N+](=O)[O-])cc2)CC1c1ccc(C(=O)OCCn2c([N+](=O)[O-])cnc2C)cc1	5.68613	506.155	10	0	3.56252	TRUE
CHEMBL221753	2084	nM	CC(C)(C)CC(C)(C)c1ccc(OCCOCC[N+](C)(C)Cc2ccccc2)cc1.[Cl-]	5.6811	447.29	2	0	3.0764	TRUE
CHEMBL3325475	2100	nM	COC(=O)C1=C(N)N(c2cccnc2)C2=C(C(=O)CCC2)C1c1cc2cc(OC)ccc2n2nnnc12	5.67778	497.181	11	1	2.6353	TRUE
CHEMBL116525	2120	nM	CC#CC(=O)Nc1cc2c(Nc3cccc(Br)c3)c(C#N)cnc2cc1OC	5.67366	434.038	5	2	4.58298	TRUE
CHEMBL290106	2147	nM	Oc1c(Cl)cc(Cl)cc1Sc1cc(Cl)cc(Cl)c1O	5.66817	353.884	3	2	5.8626	TRUE
CHEMBL1173718	2150	nM	Cc1ncc([N+](=O)[O-])n1CCOC(=O)/C=C/c1ccc(-c2ccccc2)cc1	5.66756	377.138	6	0	4.02332	TRUE
CHEMBL5193804	2170	nM	Fc1ccc(NCc2coc(/C=C/c3ccc(C(F)(F)F)cc3)n2)cc1	5.66354	362.104	3	1	5.615	TRUE
CHEMBL5171924	2210	nM	COc1ccccc1-c1ccc2c(ccn2Cc2coc(/C=C/c3ccc(C(F)(F)F)cc3)n2)c1	5.65561	474.156	4	0	7.5424	TRUE
CHEMBL590526	2210	nM	O=C(Nc1ccccc1)N(Cc1ccc(O)cc1)Cc1cc(Cl)cc(Cl)c1O	5.65561	416.069	3	3	5.6389	TRUE
CHEMBL1958212	2240	nM	Cc1ccc(C2=NN(C3=NC(=O)CS3)C(c3ccccc3)C2)cc1	5.64975	335.109	4	0	3.77552	TRUE
CHEMBL1081849	2240	nM	Cc1c(C(=O)NCCCN2CCN(C)CC2)[nH]c2cnnc(Nc3ccc(OCc4cccc(F)c4)c(Cl)c3)c12	5.64975	565.237	7	3	4.74872	TRUE
CHEMBL5181577	2250	nM	FC(F)(F)c1ccc(/C=C/c2nc(Cn3ccc4cc(-c5cccc(Cl)c5)ccc43)co2)cc1	5.64782	478.106	3	0	8.1872	TRUE
CHEMBL592211	2270	nM	O=C(Nc1ccccc1)N(Cc1ccc(O)cc1)Cc1cccc(Cl)c1O	5.64397	382.108	3	3	4.9855	TRUE
CHEMBL589589	2320	nM	CC(C)c1ccc(NC(=O)c2ccc(N(CCCl)CCCl)cc2)cc1	5.63451	378.127	2	1	5.3463	TRUE
CHEMBL2325091	2320	nM	Brc1ccc(C2=NN(c3ccccc3)C(c3cccc4ccccc34)C2)cc1	5.63451	426.073	2	0	6.958	TRUE
CHEMBL194160	2400	nM	CCc1c(CC(N)=O)cn2ncnc(Nc3ccc4c(cnn4Cc4ccccc4)c3)c12	5.61979	425.196	7	2	3.4611	TRUE
CHEMBL1928944	2421	nM	O=[N+]([O-])c1cccc(Oc2cc(Nc3ccc(OCc4cccc(F)c4)c(Cl)c3)ncn2)c1	5.61601	466.084	7	1	6.2922	TRUE
CHEMBL591910	2430	nM	O=C1CSC(N/N=C/c2ccc(Br)cc2)=N1	5.61439	296.957	4	1	2.002	TRUE
CHEMBL4084996	2500	nM	Clc1ccc(-c2nnc(Cc3nc4ccc(Cl)cc4[nH]3)o2)cc1	5.60206	344.023	4	1	4.5105	TRUE
CHEMBL1958216	2520	nM	Cc1ccc(C2=NN(C3=NC(=O)CS3)C(c3ccc(C)cc3)C2)cc1	5.5986	349.125	4	0	4.08394	TRUE
CHEMBL589831	2580	nM	O=C(Nc1ccc(Br)cc1)c1ccc(N(CCCl)CCCl)cc1	5.58838	413.99	2	1	4.9854	TRUE
CHEMBL590714	2660	nM	O=C(Nc1ccccc1)N(Cc1ccc(O)cc1)Cc1cccc(Br)c1O	5.57512	426.058	3	3	5.0946	TRUE
CHEMBL3633938	2720	nM	N#CC(C#N)=CNc1ccc2ncnc(Nc3ccc(OCc4cccc(F)c4)c(Cl)c3)c2c1	5.56543	470.106	7	2	6.08786	TRUE
CHEMBL3746711	2750	nM	CC(=O)N1N=C(c2ccc(I)cc2)CC1c1ccc(C(=O)OCCn2c([N+](=O)[O-])cnc2C)cc1	5.56067	587.067	8	0	4.25892	TRUE
CHEMBL589823	2750	nM	O=C1CSC(N/N=C/c2ccc(Cl)cc2)=N1	5.56067	253.008	4	1	1.8929	TRUE
CHEMBL1958221	2750	nM	COc1ccc(C2=NN(C3=NC(=O)CS3)C(c3ccc(Br)cc3)C2)cc1	5.56067	429.015	5	0	4.2382	TRUE
CHEMBL1173814	2770	nM	COc1ccc(C2CC(c3ccc(C)c(C)c3)=NN2C(N)=S)cc1	5.55752	339.141	3	1	3.70674	TRUE
CHEMBL316127	2776	nM	O=C(/C=C/CN1CCOCC1)Nc1ccc2ncnc(Nc3cccc(Br)c3)c2c1	5.55658	467.096	6	2	3.9628	TRUE
CHEMBL5186298	2790	nM	FC(F)(F)c1ccc(/C=C/c2nc(CNc3ccccc3Cl)co2)cc1	5.5544	378.075	3	1	6.1293	TRUE
CHEMBL196018	2800	nM	CCOC(=O)c1cn2ncnc(Nc3ccc(F)c(Cl)c3)c2c1CC	5.55284	362.095	6	1	4.0045	TRUE
CHEMBL93537	2808	nM	O=C(/C=C/CN1CCSCC1)Nc1ccc2ncnc(Nc3cccc(Br)c3)c2c1	5.5516	483.073	6	2	4.6794	TRUE
CHEMBL3218001	2900	nM	C#Cc1cccc(Nc2ncnc3ccc(S(=O)(=O)n4ccc(/C=C/C(=O)Nc5ccccc5N)c4)cc23)c1	5.5376	534.147	8	3	4.6273	TRUE
CHEMBL1683956	2900	nM	CCc1ncnc(Nc2ccc(OCc3cccc(F)c3)c(Cl)c2)c1C	5.5376	371.12	4	1	5.46252	TRUE
CHEMBL2112369	2921	nM	COC[C@@H]1CCCN1C/C=C\C(=O)Nc1ccc2ncnc(Nc3cccc(Br)c3)c2c1	5.53447	495.127	6	2	4.7414	TRUE
CHEMBL83	2949	nM	CC/C(=C(\c1ccccc1)c1ccc(OCCN(C)C)cc1)c1ccccc1	5.53033	371.225	2	0	5.9961	TRUE
CHEMBL114728	2970	nM	CCOc1cc2ncc(C#N)c(Nc3cccc(Br)c3)c2cc1NC(=O)/C=C/CN(C)C	5.52724	493.111	6	2	5.06758	TRUE
CHEMBL370934	3000	nM	CCOC(=O)c1cn2ncnc(Nc3cccc(Br)c3)c2c1CC	5.52288	388.053	6	1	3.9745	TRUE
CHEMBL2205026	3000	nM	N#Cc1ccc2c(c1)S(=O)(=O)N=S2c1ccc(Br)cc1	5.52288	365.913	3	0	3.24298	TRUE
CHEMBL56879	3000	nM	N#C/C(=C\c1ccc(O)c(O)c1)C(=O)c1ccc([N+](=O)[O-])cc1	5.52288	310.059	6	2	2.79588	TRUE
CHEMBL2325092	3010	nM	COc1ccc(C2=NN(c3ccccc3)C(c3cccc4ccccc34)C2)cc1	5.52143	378.173	3	0	6.2041	TRUE
CHEMBL245967	3030	nM	CCNCc1cncc(/C=C/c2c[nH]nc2-c2nc3ccc(OC)cc3[nH]2)c1	5.51856	374.186	5	3	3.6365	TRUE
CHEMBL1958022	3050	nM	O=C1CSC(N2N=C(c3ccccc3)CC2c2ccc(Br)cc2)=N1	5.5157	399.004	4	0	4.2296	TRUE
CHEMBL2325090	3070	nM	Clc1ccc(C2=NN(c3ccccc3)C(c3cccc4ccccc34)C2)cc1	5.51286	382.124	2	0	6.8489	TRUE
CHEMBL5174515	3070	nM	COc1ccccc1NCc1coc(/C=C/c2ccc(C(F)(F)F)cc2)n1	5.51286	374.124	4	1	5.4845	TRUE
CHEMBL518803	3100	nM	c1ccc2sc(-c3ccc(Nc4ncnc5[nH]ccc45)cc3)nc2c1	5.50864	343.089	5	2	4.9782	TRUE
CHEMBL1958214	3110	nM	Cc1ccc(C2=NN(C3=NC(=O)CS3)C(c3ccc(Cl)cc3)C2)cc1	5.50724	369.07	4	0	4.42892	TRUE
CHEMBL3902295	3200	nM	O=C(CCl)OCCn1c(=O)oc2cc3ncnc(Nc4ccc(F)c(F)c4)c3cc21	5.49485	434.059	8	1	3.3415	TRUE
CHEMBL5193926	3250	nM	COc1cccc(-c2ccc3c(ccn3Cc3coc(/C=C/c4ccc(C(F)(F)F)cc4)n3)c2)c1	5.48812	474.156	4	0	7.5424	TRUE
CHEMBL2324872	3280	nM	COc1ccc(C2=NN(C(N)=S)C(c3ccc4ccccc4c3)C2)cc1	5.48413	361.125	3	1	4.2431	TRUE
CHEMBL372112	3300	nM	CCOC(=O)c1cn2ncnc(Nc3ccc4[nH]ncc4c3)c2c1CC	5.48149	350.149	7	2	3.0883	TRUE
CHEMBL496	3318.8	nM	Oc1c(Cl)cc(Cl)c(Cl)c1Cc1c(O)c(Cl)cc(Cl)c1Cl	5.47902	403.85	2	2	6.609	TRUE
CHEMBL589830	3330	nM	O=C(Nc1ccc(Cl)cc1)c1ccc(N(CCCl)CCCl)cc1	5.47756	370.041	2	1	4.8763	TRUE
CHEMBL258940	3400	nM	CN1CCC(Nc2ncc3ncnc(Nc4ccc(F)c(Cl)c4)c3n2)CC1	5.46852	387.137	7	2	3.462	TRUE
CHEMBL3218002	3400	nM	C#Cc1cccc(Nc2ncnc3ccc(S(=O)(=O)n4ccc(/C=C/C(=O)NO)c4)cc23)c1	5.46852	459.1	8	3	2.9118	TRUE
CHEMBL1828863	3410	nM	Cc1ncc([N+](=O)[O-])n1CC(=O)NS(=O)(=O)c1ccc(Cl)cc1	5.46725	358.014	7	1	1.25822	TRUE
CHEMBL3746212	3450	nM	CC(=O)N1N=C(c2ccc(Br)cc2)CC1c1ccc(C(=O)OCCn2c([N+](=O)[O-])cnc2C)cc1	5.46218	539.08	8	0	4.41682	TRUE
CHEMBL592426	3450	nM	O=C(Nc1ccccc1)N(Cc1ccc(F)cc1)Cc1cccc(Cl)c1O	5.46218	384.104	2	2	5.419	TRUE
CHEMBL1173783	3460	nM	Cc1ncc([N+](=O)[O-])n1CCOC(=O)/C=C/c1ccc(OCc2ccccc2)cc1	5.46092	407.148	7	0	3.93532	TRUE
CHEMBL382125	3500	nM	CCCCn1c(Sc2cc(OC)ccc2OC)nc2c(N)ncnc21	5.45593	359.142	8	1	3.377	TRUE
CHEMBL3746642	3530	nM	CC(=O)N1N=C(c2ccc([N+](=O)[O-])cc2)CC1c1ccc(C(=O)OC(C)Cn2c([N+](=O)[O-])cnc2C)cc1	5.45223	520.171	10	0	3.95102	TRUE
CHEMBL1958213	3530	nM	Cc1ccc(C2=NN(C3=NC(=O)CS3)C(c3ccc(F)cc3)C2)cc1	5.45223	353.1	4	0	3.91462	TRUE
CHEMBL6246	3540	nM	O=c1oc2c(O)c(O)cc3c(=O)oc4c(O)c(O)cc1c4c23	5.451	302.006	8	4	1.3128	TRUE
CHEMBL5180538	3580	nM	FC(F)(F)c1ccc(/C=C/c2nc(Cn3ccc4cc(-c5ccc(Cl)cc5)ccc43)co2)cc1	5.44612	478.106	3	0	8.1872	TRUE
CHEMBL1828864	3590	nM	Cc1ncc([N+](=O)[O-])n1CC(=O)NS(=O)(=O)c1ccc(Br)cc1	5.44491	401.963	7	1	1.36732	TRUE
CHEMBL2325089	3590	nM	Fc1ccc(C2=NN(c3ccccc3)C(c3cccc4ccccc34)C2)cc1	5.44491	366.153	2	0	6.3346	TRUE
CHEMBL602328	3590	nM	O=C1CSC(N/N=C/c2cc(F)ccc2O)=N1	5.44491	253.032	5	2	1.0842	TRUE
CHEMBL248712	3600	nM	CCNCc1cncc(-c2cnc3[nH]nc(-c4nc5cc(F)c(F)cc5[nH]4)c3c2)c1	5.4437	405.151	5	3	3.9509	TRUE
CHEMBL1958209	3650	nM	O=C1CSC(N2N=C(c3ccc(Br)cc3)CC2c2ccc(Br)cc2)=N1	5.43771	476.915	4	0	4.9921	TRUE
CHEMBL590875	3730	nM	O=C1CSC(N/N=C/c2cc(Br)cc(Br)c2O)=N1	5.42829	390.863	5	2	2.4701	TRUE
CHEMBL65376	3800	nM	O=C(CCCC(=O)Oc1ccc(/C=C/[N+](=O)[O-])cc1)OCc1ccco1	5.42022	359.101	7	0	3.3461	TRUE
CHEMBL205870	3800	nM	C#Cc1cncnc1Nc1ccc(OCc2cccc(F)c2)c(Cl)c1	5.42022	353.073	4	1	4.573	TRUE
CHEMBL400906	3820	nM	CNCc1cncc(-c2cnc3[nH]nc(-c4nc5cc(OC(F)(F)F)ccc5[nH]4)c3c2)c1	5.41794	439.137	6	3	4.1812	TRUE
CHEMBL2325088	3830	nM	c1ccc(C2=NN(c3ccccc3)C(c3cccc4ccccc34)C2)cc1	5.4168	348.163	2	0	6.1955	TRUE
CHEMBL1958034	3840	nM	O=C1CSC(N2N=C(c3ccc(Cl)cc3)CC2c2ccc(Br)cc2)=N1	5.41567	432.965	4	0	4.883	TRUE
CHEMBL283682	3870	nM	CC#CC(=O)Nc1ccc2ncc(C#N)c(Nc3cccc(Br)c3)c2c1	5.41229	404.027	4	2	4.57438	TRUE
CHEMBL2324870	3870	nM	NC(=S)N1N=C(c2ccc(Cl)cc2)CC1c1ccc2ccccc2c1	5.41229	365.075	2	1	4.8879	TRUE
CHEMBL589822	3890	nM	O=C1CSC(N/N=C/c2ccc(F)cc2)=N1	5.41005	237.037	4	1	1.3786	TRUE
CHEMBL592711	3890	nM	O=C(Nc1ccc(F)cc1)c1ccc(N(CCCl)CCCl)cc1	5.41005	354.07	2	1	4.362	TRUE
CHEMBL3981210	3900	nM	COc1ccc(COc2ccc(Nc3ncnc4cc5oc(=O)n(CCOC(=O)CBr)c5cc34)cc2)cc1	5.40894	578.08	10	1	4.807	TRUE
CHEMBL3747281	4070	nM	CC(=O)N1N=C(c2ccc(F)cc2)CC1c1ccc(C(=O)OCCn2c([N+](=O)[O-])cnc2C)cc1	5.39041	479.16	8	0	3.79342	TRUE
CHEMBL3747277	4100	nM	CC(=O)N1N=C(c2ccc(Cl)cc2)CC1c1ccc(C(=O)OCCn2c([N+](=O)[O-])cnc2C)cc1	5.38722	495.131	8	0	4.30772	TRUE
CHEMBL3325478	4100	nM	CCOC(=O)C1=C(N)N(c2cccnc2)C2=C(C(=O)CCC2)C1c1cc2cc(C)ccc2n2nnnc12	5.38722	495.202	10	1	3.32522	TRUE
CHEMBL1958218	4120	nM	COc1ccc(C2=NN(C3=NC(=O)CS3)C(c3ccccc3)C2)cc1	5.3851	351.104	5	0	3.4757	TRUE
CHEMBL255866	4123	nM	CO/N=C/c1c(N)ncnc1Nc1ccc2[nH]ncc2c1	5.38479	283.118	7	3	1.659	TRUE
CHEMBL30973	4160	nM	CN(C)C/C=C/C(=O)Nc1ccc2ncc(C#N)c(Nc3cccc(Br)c3)c2c1	5.38091	449.085	5	2	4.66888	TRUE
CHEMBL429478	4170	nM	CCNCc1cncc(-c2cnc3[nH]nc(-c4nc5cc(OC)ccc5[nH]4)c3c2)c1	5.37986	399.181	6	3	3.6813	TRUE
CHEMBL2325106	4180	nM	COc1ccc(C2=NN(C(N)=S)C(c3cccc4ccccc34)C2)cc1	5.37882	361.125	3	1	4.2431	TRUE
CHEMBL94123	4182	nM	O=C(/C=C/N1CCOCC1)Nc1ccc2ncnc(Nc3cccc(Br)c3)c2c1	5.37862	453.08	6	2	3.9203	TRUE
CHEMBL1828860	4210	nM	Cc1ncc([N+](=O)[O-])n1CC(=O)NS(=O)(=O)c1ccccc1	5.37572	324.053	7	1	0.60482	TRUE
CHEMBL5189379	4346	nM	CN1CCN(C(C)(C)/C=C(\C#N)C(=O)N2CCC[C@@H](n3nc(-c4ccc(Oc5ccccc5)cc4F)c4c(N)ncnc43)C2)CC1	5.36191	623.313	10	1	4.64638	TRUE
CHEMBL114392	4390	nM	C=C(CN1CCOCC1)C(=O)Nc1ccc2ncc(C#N)c(Nc3ccc(F)c(Cl)c3)c2c1	5.35754	465.137	6	2	4.46948	TRUE
CHEMBL304442	4400	nM	O=C(CCCC(=O)Oc1ccc(/C=C/[N+](=O)[O-])cc1)Oc1ccccc1	5.35655	355.106	6	0	3.6153	TRUE
CHEMBL114490	4490	nM	COc1cc2ncc(C#N)c(Nc3ccc(F)c(Cl)c3)c2cc1NC(=O)/C=C/CN(C)C	5.34775	453.137	6	2	4.70748	TRUE
CHEMBL326811	4500	nM	C/C=C/C(=O)Nc1ccc2ncc(C#N)c(Nc3cccc(Br)c3)c2c1	5.34679	406.043	4	2	5.12718	TRUE
CHEMBL592481	4510	nM	O=C1CSC(N/N=C/c2cc(Cl)cc(Cl)c2O)=N1	5.34582	302.964	5	2	2.2519	TRUE
CHEMBL1958023	4640	nM	Cc1ccc(C2CC(c3ccccc3)=NN2C2=NC(=O)CS2)cc1	5.33348	335.109	4	0	3.77552	TRUE
CHEMBL1173651	4650	nM	Cc1ncc([N+](=O)[O-])n1CCOC(=O)/C=C/c1ccc(Br)cc1	5.33255	379.017	6	0	3.11882	TRUE
CHEMBL324718	4680	nM	C=CC(=O)Nc1cc2c(Nc3cccc(Br)c3)c(C#N)cnc2cc1OC	5.32975	422.038	5	2	4.74568	TRUE
CHEMBL4079125	4700	nM	Clc1ccc(-c2nnc(Cc3nc4ccccc4[nH]3)o2)c(Cl)c1	5.3279	344.023	4	1	4.5105	TRUE
CHEMBL3891774	4700	nM	O=C(Nc1ccc(Nc2ncnc3cc4oc(=O)n(CCOC(=O)CBr)c4cc23)cc1)NC1CCCCC1	5.3279	582.123	9	3	4.6736	TRUE
CHEMBL1828861	4760	nM	Cc1ccc(S(=O)(=O)NC(=O)Cn2c([N+](=O)[O-])cnc2C)cc1	5.32239	338.068	7	1	0.91324	TRUE
CHEMBL1172803	4770	nM	Cc1ncc([N+](=O)[O-])n1CCOC(=O)/C=C/c1ccc(Cl)cc1	5.32148	335.067	6	0	3.00972	TRUE
CHEMBL2070198	4800	nM	Brc1cccc(Nc2ncnc3ccc(NCc4ccc5c(c4)OCCCO5)cc23)c1	5.31876	476.085	6	2	5.9093	TRUE
CHEMBL1958021	4830	nM	O=C1CSC(N2N=C(c3ccccc3)CC2c2ccc(Cl)cc2)=N1	5.31605	355.055	4	0	4.1205	TRUE
CHEMBL1958037	4870	nM	O=C1CSC(N2N=C(c3ccc(Br)cc3)CC2c2ccccc2)=N1	5.31247	399.004	4	0	4.2296	TRUE
CHEMBL56542	4900	nM	N#C/C(=C\c1ccc(O)c(O)c1)C(=O)N1CCc2ccccc21	5.3098	306.1	4	2	2.59408	TRUE
CHEMBL425578	5000	nM	CCCCn1c(Cc2cc(OC)ccc2I)nc2c(N)ncnc21	5.30103	437.071	6	1	3.4126	TRUE
CHEMBL370808	5000	nM	COc1ccc(C#CC(C)(C)N)cc1-c1[nH]nc2nc(Nc3ccc(F)cc3F)ncc12	5.30103	434.167	6	3	4.1391	TRUE
CHEMBL1170278	5030	nM	Cc1ncc([N+](=O)[O-])n1CCOC(=O)/C=C/c1cccc2ccccc12	5.29843	351.122	6	0	3.50952	TRUE
CHEMBL92902	5042	nM	CN1CCC=C(C(=O)Nc2ccc3ncnc(Nc4cccc(Br)c4)c3c2)C1	5.2974	437.085	5	2	4.3363	TRUE
CHEMBL1958019	5120	nM	O=C1CSC(N2N=C(c3ccccc3)CC2c2ccccc2)=N1	5.29073	321.094	4	0	3.4671	TRUE
CHEMBL248713	5120	nM	CCNCc1cncc(-c2cnc3[nH]nc(-c4nc5cc(F)ccc5[nH]4)c3c2)c1	5.29073	387.161	5	3	3.8118	TRUE
CHEMBL592427	5170	nM	O=C(Nc1ccccc1)N(Cc1ccc(F)cc1)Cc1cccc(Br)c1O	5.28651	428.054	2	2	5.5281	TRUE
CHEMBL3327179	5200	nM	N#CC1=C(N)N(c2cccnc2)C2=C(C(=O)CCC2)C1c1cc2ccccc2n2nnnc12	5.284	434.16	9	1	2.97728	TRUE
CHEMBL364623	5200	nM	Cc1cc(Nc2ncc(C(=O)Nc3c(C)cccc3Cl)s2)nc(C)n1	5.284	373.076	6	2	4.50766	TRUE
CHEMBL3325474	5200	nM	COC(=O)C1=C(N)N(c2cccnc2)C2=C(C(=O)CCC2)C1c1cc2cc(C)ccc2n2nnnc12	5.284	481.186	10	1	2.93512	TRUE
CHEMBL255291	5220	nM	CO/N=C/c1c(N)ncnc1NCc1ccc(F)c(Cl)c1	5.28233	309.079	6	2	2.4437	TRUE
CHEMBL5183407	5260	nM	Fc1ccc(-c2ccc3c(ccn3Cc3coc(/C=C/c4ccc(C(F)(F)F)cc4)n3)c2)cc1	5.27901	462.136	3	0	7.6729	TRUE
CHEMBL195218	5300	nM	CONC(=O)c1cc(Nc2ncnn3cc(NC(=O)OCCCS(C)(=O)=O)c(C(C)C)c23)c(F)cc1F	5.27572	540.16	10	3	3.1489	TRUE
CHEMBL518983	5300	nM	CONC(=O)c1ccc(F)c(Nc2ncnn3cc(NC(=O)OCCCS(C)(=O)=O)c(C(C)C)c23)c1	5.27572	522.17	10	3	3.0098	TRUE
CHEMBL5206700	5300	nM	FC(F)(F)c1ccc(/C=C/c2nc(CNc3ccccc3)co2)cc1	5.27572	344.114	3	1	5.4759	TRUE
CHEMBL1683971	5380	nM	Cc1ncnc(Nc2ccc(OCc3cccc(F)c3)c(Cl)c2)c1C#CCN1CCOCC1	5.26922	466.157	6	1	4.58382	TRUE
CHEMBL5286730	5400	nM	Cc1ccc(NC(=O)CSc2nc3cc4ccccc4cc3c(=O)n2-c2ccc(S(N)(=O)=O)cc2)cc1C	5.26761	544.124	7	2	4.53394	TRUE
CHEMBL29197	5400	nM	COc1cc2ncnc(Nc3cccc(Br)c3)c2cc1OC	5.26761	359.027	5	1	4.1531	TRUE
CHEMBL2325104	5460	nM	NC(=S)N1N=C(c2ccc(Cl)cc2)CC1c1cccc2ccccc12	5.26281	365.075	2	1	4.8879	TRUE
CHEMBL263788	5660	nM	COc1cc2ncc(C#N)c(Nc3cccc(Br)c3)c2cc1NC(=O)/C=C/CN(C)C	5.24718	479.096	6	2	4.67748	TRUE
CHEMBL2325109	5690	nM	NC(=S)N1N=C(c2ccccc2)CC1c1ccc2ccccc2c1	5.24489	331.114	2	1	4.2345	TRUE
CHEMBL77030	5700	nM	N#C/C(=C\c1ccc(O)c(O)c1)C(N)=S	5.24413	220.031	4	3	1.29088	TRUE
CHEMBL472544	5700	nM	Nc1ncnc(Nc2ccc(OCc3ccccc3)c(Cl)c2)c1C(=O)NNC(=O)CCN1CCOCC1	5.24413	525.189	9	4	2.5181	TRUE
CHEMBL5202630	5790	nM	Fc1ccccc1NCc1coc(/C=C/c2ccc(C(F)(F)F)cc2)n1	5.23732	362.104	3	1	5.615	TRUE
CHEMBL592707	5830	nM	Cc1ccc(/C=N/NC2=NC(=O)CS2)cc1	5.23433	233.062	4	1	1.54792	TRUE
CHEMBL1172802	5840	nM	Cc1ncc([N+](=O)[O-])n1CCOC(=O)/C=C/c1ccc(F)cc1	5.23359	319.097	6	0	2.49542	TRUE
CHEMBL1958039	5870	nM	O=C1CSC(N2N=C(c3ccc(Br)cc3)CC2c2ccc(Cl)cc2)=N1	5.23136	432.965	4	0	4.883	TRUE
CHEMBL1016	5947.2	nM	CCOc1nc2cccc(C(=O)O)c2n1Cc1ccc(-c2ccccc2-c2nnn[nH]2)cc1	5.22569	440.16	7	2	4.0286	TRUE
CHEMBL24944	5970	nM	O=C(Nc1ccc(Br)cc1)c1cc(Br)cc(Br)c1O	5.22403	446.811	2	2	4.932	TRUE
CHEMBL459729	6000	nM	Cc1cc(C2CCN(CCCF)CC2)cc2[nH]c(-c3c(NCCn4cc(Cl)cn4)cc[nH]c3=O)nc12	5.22185	511.226	6	3	4.72762	TRUE
CHEMBL1093235	6000	nM	O=[N+]([O-])c1cccc(-c2nc3sccn3c2-c2ccnc(Nc3ccccc3)n2)c1	5.22185	414.09	8	1	5.1716	TRUE
CHEMBL1365395	6029	nM	Cc1ccc2c(C)nc(Nc3nc(O)cc(CSc4nnnn4-c4ccccc4)n3)nc2c1	5.21975	457.143	11	2	3.75384	TRUE
CHEMBL3917657	6200	nM	CC(C)(C)c1ccc(Nc2ncnc3cc4oc(=O)n(CCOC(=O)CBr)c4cc23)cc1	5.20761	498.09	8	1	4.5169	TRUE
CHEMBL1958024	6210	nM	COc1ccc(C2CC(c3ccccc3)=NN2C2=NC(=O)CS2)cc1	5.20691	351.104	5	0	3.4757	TRUE
CHEMBL1958217	6230	nM	COc1ccc(C2CC(c3ccc(C)cc3)=NN2C2=NC(=O)CS2)cc1	5.20551	365.12	5	0	3.78412	TRUE
CHEMBL1958028	6240	nM	O=C1CSC(N2N=C(c3ccc(F)cc3)CC2c2ccc(Br)cc2)=N1	5.20482	416.995	4	0	4.3687	TRUE
CHEMBL1683950	6300	nM	Fc1cccc(COc2ccc(Nc3cc(-c4ccccc4)ncn3)cc2Cl)c1	5.20066	405.104	4	1	6.2587	TRUE
CHEMBL1958020	6350	nM	O=C1CSC(N2N=C(c3ccccc3)CC2c2ccc(F)cc2)=N1	5.19723	339.084	4	0	3.6062	TRUE
CHEMBL296407	6400	nM	N#C/C(=C\c1ccc(O)c(O)c1)C(N)=O	5.19382	204.053	4	3	0.49008	TRUE
CHEMBL592200	6490	nM	Oc1c(Cl)cc(Cl)cc1CN(Cc1ccc(F)cc1)C(=S)Nc1ccccc1	5.18776	434.042	2	2	6.2373	TRUE
CHEMBL4094471	6500	nM	Clc1ccccc1-c1nnc(Cc2nc3ccccc3[nH]2)o1	5.18709	310.062	4	1	3.8571	TRUE
CHEMBL1683949	6500	nM	Cc1cc(Nc2ccc(OCc3cccc(F)c3)c(Cl)c2)ncn1	5.18709	343.089	4	1	4.90012	TRUE
CHEMBL2070191	6500	nM	Clc1cccc(Nc2ncnc3ccc(NCc4ccc5c(c4)OCO5)cc23)c1	5.18709	404.104	6	2	5.3676	TRUE
CHEMBL249304	6510	nM	CN1CCN(c2ccc3[nH]c(-c4n[nH]c5ncc(-c6cncc7ccccc67)cc45)nc3c2)CC1	5.18642	460.212	6	2	4.4682	TRUE
CHEMBL3133831	6530	nM	CCOc1cccc(Nc2ccnc3[nH]c4ccc(S(=O)(=O)N5CCN(CCO)CC5)cc4c23)c1	5.18509	495.194	7	3	3.157	TRUE
CHEMBL1173667	6580	nM	NC(=S)N1N=C(c2ccc(Cl)c(Cl)c2)CC1c1ccc(O)cc1	5.18177	365.016	3	2	4.0937	TRUE
CHEMBL63559	6600	nM	COc1ccc(OC(=O)CCCC(=O)Oc2ccc(/C=C/[N+](=O)[O-])cc2)cc1	5.18046	385.116	7	0	3.6239	TRUE
CHEMBL428206	6600	nM	N#Cc1n[nH]nc1-c1ccc(Oc2ccccc2)cc1	5.18046	262.085	4	1	3.13568	TRUE
CHEMBL2325107	6680	nM	Cc1ccc(C2=NN(C(N)=S)C(c3cccc4ccccc34)C2)cc1	5.17522	345.13	2	1	4.54292	TRUE
CHEMBL2325108	6840	nM	NC(=S)N1N=C(c2ccc(Cl)c(Cl)c2)CC1c1cccc2ccccc12	5.16494	399.036	2	1	5.5413	TRUE
CHEMBL590876	6930	nM	O=C1CSC(N/N=C/c2ccc(O)cc2)=N1	5.15927	235.042	5	2	0.9451	TRUE
CHEMBL85021	7000	nM	CC(C)c1cc(/C=C2\C(=O)Nc3ccccc32)cc(C(C)C)c1O	5.1549	321.173	2	2	5.1317	TRUE
CHEMBL1828867	7020	nM	O=C(Cc1ccc(F)cc1)NS(=O)(=O)c1ccc(F)cc1	5.15366	311.043	3	1	2.0124	TRUE
CHEMBL1958210	7040	nM	Cc1ccc(C2CC(c3ccc(Br)cc3)=NN2C2=NC(=O)CS2)cc1	5.15243	413.02	4	0	4.53802	TRUE
CHEMBL1958031	7050	nM	O=C1CSC(N2N=C(c3ccc(Cl)cc3)CC2c2ccccc2)=N1	5.15181	355.055	4	0	4.1205	TRUE
CHEMBL604785	7130	nM	Cc1cccc(CN(Cc2ccc(O)cc2)C(=S)Nc2ccccc2)c1O	5.14691	378.14	3	3	4.80542	TRUE
CHEMBL371863	7200	nM	CCOC(=O)c1cn2ncnc(NCc3ccccc3)c2c1CC	5.14267	324.159	6	1	3.0805	TRUE
CHEMBL2325102	7240	nM	NC(=S)N1N=C(c2ccccc2)CC1c1cccc2ccccc12	5.14026	331.114	2	1	4.2345	TRUE
CHEMBL1958222	7350	nM	COc1ccc(C2=NN(C3=NC(=O)CS3)C(c3ccc(C)cc3)C2)cc1	5.13371	365.12	5	0	3.78412	TRUE
CHEMBL3809172	7400	nM	O=C1N=C(C(=O)c2c[nH]c3ccccc23)N/C1=C\c1c[nH]c2cc(O)ccc12	5.13077	370.107	4	4	3.1069	TRUE
CHEMBL4869634	7491	nM	CC(C)Oc1cc(F)ccc1Nc1ncnc2ccc(-c3ccc(C(=O)N4CCNCC4)cc3)nc12	5.12546	486.218	7	2	4.4071	TRUE
CHEMBL1828868	7560	nM	O=C(Cc1ccc(F)cc1)NS(=O)(=O)c1ccc(Cl)cc1	5.12148	327.013	3	1	2.5267	TRUE
CHEMBL5180660	7590	nM	FC(F)(F)c1ccc(/C=C/c2nc(Cn3ccc4cc(-c5ccccc5)ccc43)co2)cc1	5.11976	444.145	3	0	7.5338	TRUE
CHEMBL1958220	7590	nM	COc1ccc(C2=NN(C3=NC(=O)CS3)C(c3ccc(Cl)cc3)C2)cc1	5.11976	385.065	5	0	4.1291	TRUE
CHEMBL489083	7700	nM	N=C(N)SCCCn1c(=O)c2c(c1=O)n1c3ccccc3cc1c1cccc3ccn2c31	5.11351	441.126	7	2	3.62807	TRUE
CHEMBL424252	7800	nM	CCN(CC)C/C=C/C(=O)Nc1cc2c(Nc3ccc(F)c(Cl)c3)c(C#N)cnc2cc1OC	5.10791	481.168	6	2	5.48768	TRUE
CHEMBL238828	7900	nM	N#Cc1n[nH]nc1-c1ccc(Br)cc1	5.10237	247.97	3	1	2.10588	TRUE
CHEMBL201772	8000	nM	CCCCn1c(Cc2cc(OC)ccc2Br)nc2c(N)ncnc21	5.09691	389.085	6	1	3.5705	TRUE
CHEMBL3633939	8000	nM	N#CC(C#N)=CNc1ccc2ncnc(Nc3ccc(OCc4ccccn4)c(Cl)c3)c2c1	5.09691	453.11	8	2	5.34376	TRUE
CHEMBL365318	8000	nM	CONC(=O)c1cc(Nc2ncnn3cc(-c4nnc(C)o4)c(C(C)C)c23)c(F)cc1F	5.09691	443.152	9	2	3.52412	TRUE
CHEMBL1958219	8040	nM	COc1ccc(C2=NN(C3=NC(=O)CS3)C(c3ccc(F)cc3)C2)cc1	5.09474	369.095	5	0	3.6148	TRUE
CHEMBL1958035	8130	nM	Cc1ccc(C2CC(c3ccc(Cl)cc3)=NN2C2=NC(=O)CS2)cc1	5.08991	369.07	4	0	4.42892	TRUE
CHEMBL1958038	8140	nM	O=C1CSC(N2N=C(c3ccc(Br)cc3)CC2c2ccc(F)cc2)=N1	5.08938	416.995	4	0	4.3687	TRUE
CHEMBL1828869	8180	nM	O=C(Cc1ccc(F)cc1)NS(=O)(=O)c1ccc(Br)cc1	5.08725	370.963	3	1	2.6358	TRUE
CHEMBL89723	8200	nM	CC(C)c1cc(/C=C2\C(=O)Nc3ccc(Cl)cc32)cc(C(C)C)c1O	5.08619	355.134	2	2	5.7851	TRUE
CHEMBL3747776	8270	nM	CC(=O)N1N=C(c2ccc(Br)cc2)CC1c1ccc(C(=O)OC(C)Cn2c([N+](=O)[O-])cnc2C)cc1	5.08249	553.096	8	0	4.80532	TRUE
CHEMBL1828865	8410	nM	O=C(Cc1ccc(F)cc1)NS(=O)(=O)c1ccccc1	5.0752	293.052	3	1	1.8733	TRUE
CHEMBL604671	8460	nM	O=C1CSC(N/N=C/c2ccc([N+](=O)[O-])cc2)=N1	5.07263	264.032	6	1	1.1477	TRUE
CHEMBL3747152	8540	nM	CC(=O)N1N=C(c2ccc(F)cc2)CC1c1ccc(C(=O)OC(C)Cn2c([N+](=O)[O-])cnc2C)cc1	5.06854	493.176	8	0	4.18192	TRUE
CHEMBL86754	8577	nM	Oc1c(I)cc(I)c2cccnc12	5.06666	396.846	2	1	3.1496	TRUE
CHEMBL5182590	8630	nM	Fc1cccc(NCc2coc(/C=C/c3ccc(C(F)(F)F)cc3)n2)c1	5.06399	362.104	3	1	5.615	TRUE
CHEMBL5270270	8730	nM	COc1cc2ncnc(NCCOc3ccccc3F)c2cc1OC	5.05899	343.133	6	1	3.277	TRUE
CHEMBL118000	8740	nM	N#Cc1cnc2ccc(NC(=O)/C=C/CN3CCOCC3)cc2c1Nc1ccc(F)c(Cl)c1	5.05849	465.137	6	2	4.46948	TRUE
CHEMBL4066118	8800	nM	c1ccc2c(Cc3nnc(Cc4nc5ccccc5[nH]4)o3)cccc2c1	5.05552	340.132	4	1	4.2807	TRUE
CHEMBL3133815	8830	nM	O=[N+]([O-])c1cccc(Nc2ccnc3[nH]c4ccc(Br)cc4c23)c1	5.05404	382.007	4	2	5.1304	TRUE
CHEMBL92882	8832	nM	COC/C=C/C(=O)Nc1ccc2ncnc(Nc3cccc(Br)c3)c2c1	5.05394	412.053	5	2	4.277	TRUE
CHEMBL3325471	8900	nM	COc1ccc2c(c1)cc(C1C(C#N)=C(N)N(c3cccnc3)C3=C1C(=O)CCC3)c1nnnn12	5.05061	464.171	10	1	2.98588	TRUE
CHEMBL3325476	9000	nM	COC(=O)C1=C(N)N(c2cccnc2)C2=C(C(=O)CCC2)C1c1cc2cc(Cl)ccc2n2nnnc12	5.04576	501.132	10	1	3.2801	TRUE
CHEMBL2325105	9150	nM	NC(=S)N1N=C(c2ccc(Br)cc2)CC1c1cccc2ccccc12	5.03858	409.025	2	1	4.997	TRUE
CHEMBL592708	9170	nM	COc1ccc(/C=N/NC2=NC(=O)CS2)cc1	5.03763	249.057	5	1	1.2481	TRUE
CHEMBL1170459	9240	nM	Cc1ncc([N+](=O)[O-])n1CCOC(=O)/C=C/c1ccc2ccccc2c1	5.03433	351.122	6	0	3.50952	TRUE
CHEMBL1958211	9270	nM	COc1ccc(C2CC(c3ccc(Br)cc3)=NN2C2=NC(=O)CS2)cc1	5.03292	429.015	5	0	4.2382	TRUE
CHEMBL394465	9300	nM	CN1CCN(c2ccc3nc(-c4n[nH]cc4/C=C/c4cccnc4)[nH]c3c2)CC1	5.03152	385.201	5	2	3.2702	TRUE
CHEMBL116857	9350	nM	COc1cc(NC(=O)/C=C/CN(C)C)cc2c(Nc3cccc(Br)c3)c(C#N)cnc12	5.02919	479.096	6	2	4.67748	TRUE
CHEMBL592247	9470	nM	Cc1cc(C)c(O)c(CN(Cc2ccc(O)cc2)C(=S)Nc2ccccc2)c1	5.02365	392.156	3	3	5.11384	TRUE
CHEMBL461140	9500	nM	CN(C)CCOc1ccc(/C=C/c2cc(-c3cc4c(=O)[nH]cnc4[nH]3)ccn2)cc1	5.02228	401.185	5	2	3.424	TRUE
CHEMBL325156	9580	nM	CCN(CC)C(C)/C=C/C(=O)Nc1cc2c(Nc3ccc(F)c(Cl)c3)c(C#N)cnc2cc1OC	5.01863	495.184	6	2	5.87618	TRUE
CHEMBL589809	9640	nM	O=C(Nc1ccccc1)N(Cc1ccc(F)cc1)Cc1cc(Cl)cc(Cl)c1O	5.01592	418.065	2	2	6.0724	TRUE
CHEMBL1173653	9650	nM	Cc1ccc(/C=C/C(=O)OCCn2c([N+](=O)[O-])cnc2C)cc1	5.01547	315.122	6	0	2.66474	TRUE
CHEMBL369967	9700	nM	CCNCc1cn2ncnc(Nc3ccc4c(cnn4Cc4ccccc4)c3)c2c1CC	5.01323	425.233	7	2	4.5428	TRUE
CHEMBL604672	9950	nM	O=C(Nc1ccccc1Br)c1ccc(N(CCCl)CCCl)cc1	5.00218	413.99	2	1	4.9854	TRUE
CHEMBL3746168	9960	nM	CC(=O)N1N=C(c2ccc(Cl)cc2)CC1c1ccc(C(=O)OC(C)Cn2c([N+](=O)[O-])cnc2C)cc1	5.00174	509.147	8	0	4.69622	TRUE
CHEMBL1958033	9960	nM	O=C1CSC(N2N=C(c3ccc(Cl)cc3)CC2c2ccc(Cl)cc2)=N1	5.00174	389.016	4	0	4.7739	TRUE
CHEMBL1173714	9970	nM	Cc1ncc([N+](=O)[O-])n1CCOC(=O)/C=C/c1ccc(C(C)C)cc1	5.0013	343.153	6	0	3.47972	TRUE
CHEMBL1172957	10000	nM	NS(=O)(=O)c1ccc(Nc2nc(N3CCOCC3)nc3[nH]cnc23)cc1	5	375.111	8	3	0.5805	TRUE
CHEMBL462343	10000	nM	Nc1ncnc(Nc2ccc(OCc3ccccc3)c(Cl)c2)c1C(=O)NCCN1CCCCC1	5	480.204	7	3	4.2505	TRUE
CHEMBL518646	10000	nM	Nc1ncnc(Nc2ccc(OCc3ccccc3)c(Cl)c2)c1C(=O)NCCN1CCOCC1	5	482.183	8	3	3.0968	TRUE
CHEMBL54471	10000	nM	Cc1ccc(C(=O)/C(C#N)=C/c2ccc(O)c(O)c2)cc1	5	279.09	4	2	3.1961	TRUE
CHEMBL3884319	10000	nM	CC1(C)C(=O)N([C@H]2CCc3c(O)cccc32)c2nc(Nc3ccccc3)ncc21	5	386.174	5	2	4.2375	TRUE
CHEMBL5169997	10230	nM	FC(F)(F)c1ccc(/C=C/c2nc(Cn3ccc4cc(-c5ccccc5Cl)ccc43)co2)cc1	4.99012	478.106	3	0	8.1872	TRUE
CHEMBL1958029	10260	nM	Cc1ccc(C2CC(c3ccc(F)cc3)=NN2C2=NC(=O)CS2)cc1	4.98885	353.1	4	0	3.91462	TRUE
CHEMBL590524	10260	nM	O=C1CSC(N/N=C/c2cccc(Br)c2)=N1	4.98885	296.957	4	1	2.002	TRUE
CHEMBL1958036	10340	nM	COc1ccc(C2CC(c3ccc(Cl)cc3)=NN2C2=NC(=O)CS2)cc1	4.98548	385.065	5	0	4.1291	TRUE
CHEMBL1958223	10480	nM	COc1ccc(C2=NN(C3=NC(=O)CS3)C(c3ccc(OC)cc3)C2)cc1	4.97964	381.115	6	0	3.4843	TRUE
CHEMBL1828866	10530	nM	Cc1ccc(S(=O)(=O)NC(=O)Cc2ccc(F)cc2)cc1	4.97757	307.068	3	1	2.18172	TRUE
CHEMBL1958025	10530	nM	O=C1CSC(N2N=C(c3ccc(F)cc3)CC2c2ccccc2)=N1	4.97757	339.084	4	0	3.6062	TRUE
CHEMBL2325103	10630	nM	NC(=S)N1N=C(c2ccc(F)cc2)CC1c1cccc2ccccc12	4.97347	349.105	2	1	4.3736	TRUE
CHEMBL1173652	10780	nM	Cc1ncc([N+](=O)[O-])n1CCOC(=O)/C=C/c1ccccc1	4.96738	301.106	6	0	2.35632	TRUE
CHEMBL1987813	10800	nM	O=C1C2=C(C(=O)c3c(O)ccc(O)c31)[C@@H](O)[C@@H](O)[C@@H](O)C2	4.96658	292.058	7	5	-0.7402	TRUE
CHEMBL393014	11000	nM	N#Cc1n[nH]nc1-c1ccc(Cl)cc1	4.95861	204.02	3	1	1.99678	TRUE
CHEMBL1828872	11050	nM	O=C(Cc1ccc(Cl)cc1)NS(=O)(=O)c1ccc(F)cc1	4.95664	327.013	3	1	2.5267	TRUE
CHEMBL4780210	11211.4	nM	Cc1ccc(C2=N/C(=C\c3ccc(Cl)cc3)C(=O)NN2C(=O)c2nc3c(c(C)nn3-c3ccccc3)c(=O)[nH]2)cc1	4.95034	563.147	7	2	4.35394	TRUE
CHEMBL1699836	11400	nM	O=C1C(CO)=C(CO)C(=O)c2c(O)ccc(O)c21	4.9431	250.048	6	4	-0.242	TRUE
CHEMBL113901	11820	nM	COc1cc2ncc(C#N)c(Nc3ccc(F)c(Cl)c3)c2cc1NC(=O)/C=C/C(C)N(C)C	4.92738	467.152	6	2	5.09598	TRUE
CHEMBL245770	12000	nM	COc1cncc(/C=C/c2c[nH]nc2-c2nc3ccc(OC)cc3[nH]2)c1	4.92082	347.138	5	2	3.5356	TRUE
CHEMBL113194	12000	nM	CCCCn1c(Cc2cc(OC)ccc2OC)nc2c(N)ncnc21	4.92082	341.185	7	1	2.8166	TRUE
CHEMBL59145	12000	nM	N#C/C(=C\c1ccc(O)c(O)c1)C(=O)c1ccccc1Cl	4.92082	299.035	4	2	3.54108	TRUE
CHEMBL3746387	12050	nM	COc1ccc(C2=NN(C(C)=O)C(c3ccc(C(=O)OC(C)Cn4c([N+](=O)[O-])cnc4C)cc3)C2)cc1	4.91901	505.196	9	0	4.05142	TRUE
CHEMBL5192580	12140	nM	Fc1ccccc1-c1ccc2c(ccn2Cc2coc(/C=C/c3ccc(C(F)(F)F)cc3)n2)c1	4.91578	462.136	3	0	7.6729	TRUE
CHEMBL3393072	12370	nM	O=C(Cc1c[nH]c2ccccc12)NNC(=S)Nc1ncccc1Br	4.90763	403.01	3	4	2.8857	TRUE
CHEMBL1958030	12430	nM	COc1ccc(C2CC(c3ccc(F)cc3)=NN2C2=NC(=O)CS2)cc1	4.90553	369.095	5	0	3.6148	TRUE
CHEMBL3746564	12660	nM	CC(=O)N1N=C(c2ccc(I)cc2)CC1c1ccc(C(=O)OC(C)Cn2c([N+](=O)[O-])cnc2C)cc1	4.89757	601.082	8	0	4.64742	TRUE
CHEMBL592710	12870	nM	O=C(Nc1ccccc1Cl)c1ccc(N(CCCl)CCCl)cc1	4.89042	370.041	2	1	4.8763	TRUE
CHEMBL1828870	13070	nM	O=C(Cc1ccc(Cl)cc1)NS(=O)(=O)c1ccccc1	4.88372	309.023	3	1	2.3876	TRUE
CHEMBL296419	13084	nM	COc1ccc(CCN2CCC(Nc3nc4ccccc4n3Cc3ccc(F)cc3)CC2)cc1	4.88326	458.248	5	1	5.3513	TRUE
CHEMBL3746268	13160	nM	CC(=O)N1N=C(c2ccc(C)cc2)CC1c1ccc(C(=O)OCCn2c([N+](=O)[O-])cnc2C)cc1	4.88074	475.186	8	0	3.96274	TRUE
CHEMBL1958027	13160	nM	O=C1CSC(N2N=C(c3ccc(F)cc3)CC2c2ccc(Cl)cc2)=N1	4.88074	373.045	4	0	4.2596	TRUE
CHEMBL86945	13200	nM	COc1ccc(/C=C2\C(=O)Nc3ccccc32)cc1C(C)(C)C	4.87943	307.157	2	1	4.4854	TRUE
CHEMBL605957	13316	nM	COc1cc(C2=C(c3c[nH]c4ccc(Br)cc34)C(=O)NC2=O)cc(OC)c1OC	4.87563	456.032	5	2	3.5234	TRUE
CHEMBL1828873	13320	nM	O=C(Cc1ccc(Cl)cc1)NS(=O)(=O)c1ccc(Cl)cc1	4.8755	342.984	3	1	3.041	TRUE
CHEMBL5183228	13340	nM	Cc1ccccc1-c1ccc2c(ccn2Cc2coc(/C=C/c3ccc(C(F)(F)F)cc3)n2)c1	4.87484	458.161	3	0	7.84222	TRUE
CHEMBL56543	13500	nM	N#C/C(=C\c1ccc(O)c(O)c1)C(=O)NCc1ccccc1	4.86967	294.1	4	3	2.32118	TRUE
CHEMBL239895	13500	nM	CC(C)c1ccc(-c2n[nH]nc2C#N)cc1	4.86967	212.106	3	1	2.46678	TRUE
CHEMBL1828874	13560	nM	O=C(Cc1ccc(Cl)cc1)NS(=O)(=O)c1ccc(Br)cc1	4.86774	386.933	3	1	3.1501	TRUE
CHEMBL55204	13600	nM	N#C/C(=C\c1ccc(O)c(O)c1)C(=O)c1ccc(F)cc1	4.86646	283.064	4	2	3.02678	TRUE
CHEMBL808	13904	nM	Clc1ccc(COC(Cn2ccnc2)c2ccc(Cl)cc2Cl)cc1	4.85686	380.025	3	0	5.8014	TRUE
CHEMBL3747079	14040	nM	CC(=O)N1N=C(c2ccccc2)CC1c1ccc(C(=O)OCCn2c([N+](=O)[O-])cnc2C)cc1	4.85263	461.17	8	0	3.65432	TRUE
CHEMBL1173713	14320	nM	COc1ccc(/C=C/C(=O)OCCn2c([N+](=O)[O-])cnc2C)cc1	4.84406	331.117	7	0	2.36492	TRUE
CHEMBL592139	14340	nM	O=C1CSC(N/N=C/c2cccc(Cl)c2)=N1	4.84345	253.008	4	1	1.8929	TRUE
CHEMBL3325470	14800	nM	Cc1ccc2c(c1)cc(C1C(C#N)=C(N)N(c3cccnc3)C3=C1C(=O)CCC3)c1nnnn12	4.82974	448.176	9	1	3.2857	TRUE
CHEMBL3747407	14930	nM	CCOc1ccc(C2=NN(C(C)=O)C(c3ccc(C(=O)OCCn4c([N+](=O)[O-])cnc4C)cc3)C2)cc1	4.82594	505.196	9	0	4.05302	TRUE
CHEMBL597492	15180	nM	COc1cc(C2=C(c3c[nH]c4ccc(I)cc34)C(=O)NC2=O)cc(OC)c1OC	4.81873	504.018	5	2	3.3655	TRUE
CHEMBL86944	15200	nM	COc1c(Br)cc(/C=C2\C(=O)Nc3ccc(Cl)cc32)cc1C(C)(C)C	4.81816	419.029	2	1	5.9013	TRUE
CHEMBL92086	15238	nM	C=C(C)C(=O)Nc1ccc2ncnc(Nc3cccc(Br)c3)c2c1	4.81707	382.043	4	2	4.6505	TRUE
CHEMBL589825	15390	nM	O=C(Nc1ccccc1F)c1ccc(N(CCCl)CCCl)cc1	4.81276	354.07	2	1	4.362	TRUE
CHEMBL1828871	15570	nM	Cc1ccc(S(=O)(=O)NC(=O)Cc2ccc(Cl)cc2)cc1	4.80771	323.038	3	1	2.69602	TRUE
CHEMBL93754	15624	nM	O=C(/C=C/Cn1cccn1)Nc1ccc2ncnc(Nc3cccc(Br)c3)c2c1	4.80621	448.065	6	2	4.5273	TRUE
CHEMBL589801	15660	nM	Cc1cccc(CN(Cc2ccc(F)cc2)C(=S)Nc2ccccc2)c1O	4.80521	380.136	2	2	5.23892	TRUE
CHEMBL428690	15800	nM	CN1CC[C@H](c2c(O)cc(O)c3c(=O)cc(-c4ccccc4Cl)oc23)[C@H](O)C1	4.80134	401.103	6	3	3.3046	TRUE
CHEMBL483085	16000	nM	N#C/C(=C\c1ccc(O)c(O)c1)C(=O)Nc1cccc(C(F)(F)F)c1	4.79588	348.072	4	3	3.66228	TRUE
CHEMBL589068	16120	nM	Cc1cc(C)c(O)c(CN(Cc2ccc(O)cc2)C(=O)Nc2ccccc2)c1	4.79263	376.179	3	3	4.94894	TRUE
CHEMBL86326	16200	nM	COc1ccc(/C=C2\C(=O)Nc3ccc(Cl)cc32)cc1C(C)(C)C	4.79048	341.118	2	1	5.1388	TRUE
CHEMBL1828877	16260	nM	O=C(Cc1ccc(Br)cc1)NS(=O)(=O)c1ccc(F)cc1	4.78888	370.963	3	1	2.6358	TRUE
CHEMBL1958032	16420	nM	O=C1CSC(N2N=C(c3ccc(Cl)cc3)CC2c2ccc(F)cc2)=N1	4.78463	373.045	4	0	4.2596	TRUE
CHEMBL393015	16600	nM	N#Cc1n[nH]nc1-c1ccc(Oc2ccccc2)c(F)c1	4.77989	280.076	4	1	3.27478	TRUE
CHEMBL1172951	16750	nM	Cc1ncc([N+](=O)[O-])n1CCOC(=O)/C=C/c1cccc(F)c1	4.77599	319.097	6	0	2.49542	TRUE
CHEMBL48760	16900	nM	CC(C)c1ccc(/C=C2/C(=O)Nc3ccccc32)cc1	4.77211	263.131	1	1	4.3027	TRUE
CHEMBL3747570	17000	nM	CC(=O)N1N=C(c2ccccc2)CC1c1ccc(C(=O)OC(C)Cn2c([N+](=O)[O-])cnc2C)cc1	4.76955	475.186	8	0	4.04282	TRUE
CHEMBL417941	17000	nM	N#C/C(=C\c1ccc(O)c(O)c1)C(=O)NC1CCCCC1	4.76955	286.132	4	3	2.45368	TRUE
CHEMBL401930	17100	nM	Cc1cc(N2CCOCC2)cc2[nH]c(-c3c(NC[C@@H](O)c4cccc(Cl)c4)cc[nH]c3=O)nc12	4.767	479.172	6	4	3.86212	TRUE
CHEMBL3747055	17250	nM	COc1ccc(C2=NN(C(C)=O)C(c3ccc(C(=O)OCCn4c([N+](=O)[O-])cnc4C)cc3)C2)cc1	4.76321	491.18	9	0	3.66292	TRUE
CHEMBL56132	18000	nM	N#C/C(=C\c1ccc(O)c(O)c1)C(=O)c1ccccc1	4.74473	265.074	4	2	2.88768	TRUE
CHEMBL56393	18000	nM	N#C/C(=C\c1ccc(O)c(O)c1)C(=O)c1ccc(O)c(O)c1	4.74473	297.064	6	4	2.29888	TRUE
CHEMBL210638	18000	nM	COc1cc(C2CC(c3ccccc3O)=NN2)ccc1O	4.74473	284.116	5	3	2.5451	TRUE
CHEMBL3745929	18120	nM	CCOc1ccc(C2=NN(C(C)=O)C(c3ccc(C(=O)OC(C)Cn4c([N+](=O)[O-])cnc4C)cc3)C2)cc1	4.74184	519.212	9	0	4.44152	TRUE
CHEMBL1958026	18120	nM	O=C1CSC(N2N=C(c3ccc(F)cc3)CC2c2ccc(F)cc2)=N1	4.74184	357.075	4	0	3.7453	TRUE
CHEMBL590525	18430	nM	Cc1cccc(CN(Cc2ccc(O)cc2)C(=O)Nc2ccccc2)c1O	4.73447	362.163	3	3	4.64052	TRUE
CHEMBL4539558	18460	nM	N=C1NC(=O)/C(=C2/CCNC(=O)c3[nH]cc(Br)c32)N1	4.73377	323.002	3	5	0.27597	TRUE
CHEMBL1173014	18820	nM	COc1cccc(/C=C/C(=O)OCCn2c([N+](=O)[O-])cnc2C)c1	4.72538	331.117	7	0	2.36492	TRUE
CHEMBL3746980	18890	nM	CC(=O)N1N=C(c2ccc(C)cc2)CC1c1ccc(C(=O)OC(C)Cn2c([N+](=O)[O-])cnc2C)cc1	4.72377	489.201	8	0	4.35124	TRUE
CHEMBL10	18896	nM	C[S+]([O-])c1ccc(-c2nc(-c3ccc(F)cc3)c(-c3ccncc3)[nH]2)cc1	4.72363	377.1	3	1	4.6822	TRUE
CHEMBL1828878	18940	nM	O=C(Cc1ccc(Br)cc1)NS(=O)(=O)c1ccc(Cl)cc1	4.72262	386.933	3	1	3.1501	TRUE
CHEMBL87746	19000	nM	COc1c(Br)cc(/C=C2\C(=O)Nc3ccccc32)cc1C(C)(C)C	4.72125	385.068	2	1	5.2479	TRUE
CHEMBL1828875	19050	nM	O=C(Cc1ccc(Br)cc1)NS(=O)(=O)c1ccccc1	4.72011	352.972	3	1	2.4967	TRUE
CHEMBL3325472	19300	nM	N#CC1=C(N)N(c2cccnc2)C2=C(C(=O)CCC2)C1c1cc2cc(Cl)ccc2n2nnnc12	4.71444	468.121	9	1	3.63068	TRUE
CHEMBL1172950	19340	nM	Cc1ncc([N+](=O)[O-])n1CCOC(=O)/C=C/c1cccc([N+](=O)[O-])c1	4.71354	346.091	8	0	2.26452	TRUE
CHEMBL71	19366	nM	CN(C)CCCN1c2ccccc2Sc2ccc(Cl)cc21	4.71296	318.096	3	0	4.8944	TRUE
CHEMBL726	19570	nM	OCCN1CCN(CCCN2c3ccccc3Sc3ccc(C(F)(F)F)cc32)CC1	4.70841	437.175	5	1	4.3081	TRUE
CHEMBL1828879	19830	nM	O=C(Cc1ccc(Br)cc1)NS(=O)(=O)c1ccc(Br)cc1	4.70268	430.883	3	1	3.2592	TRUE
CHEMBL199865	20000	nM	CCCCn1c(Cc2cc(OC)ccc2Cl)nc2c(N)ncnc21	4.69897	345.136	6	1	3.4614	TRUE
CHEMBL1828876	20330	nM	Cc1ccc(S(=O)(=O)NC(=O)Cc2ccc(Br)cc2)cc1	4.69186	366.988	3	1	2.80512	TRUE
CHEMBL1829273	20450	nM	O=C(Cc1cccc(Br)c1)NS(=O)(=O)c1ccc(F)cc1	4.68931	370.963	3	1	2.6358	TRUE
CHEMBL4531006	20990	nM	N=C1NC(=O)/C(=C2/CCNC(=O)c3[nH]c(Br)c(Br)c32)N1	4.67799	400.912	3	5	1.03847	TRUE
CHEMBL205652	21000	nM	Fc1cccc(COc2ccc(Nc3ccncn3)cc2Cl)c1	4.67778	329.073	4	1	4.5917	TRUE
CHEMBL71884	21000	nM	Cc1cc2nc(CBr)c(-c3ccccc3)nc2cc1C	4.67778	326.042	2	0	4.80854	TRUE
CHEMBL113902	21510	nM	C/C=C/C(=O)Nc1cc2c(Nc3ccc(F)c(Cl)c3)c(C#N)cnc2cc1OCC	4.66736	424.11	5	2	5.55588	TRUE
CHEMBL329642	21657	nM	C/C=C\C(=O)Nc1ccc2ncnc(Nc3cccc(Br)c3)c2c1	4.6644	382.043	4	2	4.6505	TRUE
CHEMBL590877	21750	nM	O=C1CSC(N/N=C/c2cccc(F)c2)=N1	4.66254	237.037	4	1	1.3786	TRUE
CHEMBL314021	22500	nM	CN1C(=O)/C(=C\c2ccc(Br)cc2)c2ccccc21	4.64782	313.01	1	0	3.9661	TRUE
CHEMBL3325480	22700	nM	CCOC(=O)C1=C(N)N(c2cccnc2)C2=C(C(=O)CCC2)C1c1cc2cc(Cl)ccc2n2nnnc12	4.64397	515.147	10	1	3.6702	TRUE
CHEMBL589120	22750	nM	CN(C(=O)c1ccc(N(CCCl)CCCl)cc1)c1ccccc1	4.64302	350.095	2	0	4.2472	TRUE
CHEMBL293749	23000	nM	N#C/C(=C\c1ccc(O)c(O)c1)C(=O)NCCc1ccccc1	4.63827	308.116	4	3	2.36368	TRUE
CHEMBL1828882	23450	nM	COc1ccc(CC(=O)NS(=O)(=O)c2ccc(F)cc2)cc1	4.62986	323.063	4	1	1.8819	TRUE
CHEMBL1829274	23460	nM	O=C(Cc1cccc(Br)c1)NS(=O)(=O)c1ccc(Cl)cc1	4.62967	386.933	3	1	3.1501	TRUE
CHEMBL113985	23590	nM	COc1cc(NC(=O)/C=C/CN2CCOCC2)cc2c(Nc3cccc(Br)c3)c(C#N)cnc12	4.62727	521.106	7	2	4.44808	TRUE
CHEMBL4446681	24000	nM	CN(CCc1ccc(-c2ccccc2)cc1)Cc1cn(C)c2ccc(C(=O)Nc3ccc(F)cc3)cc12	4.61979	491.237	3	1	6.9112	TRUE
CHEMBL488646	25000	nM	COc1cc(C2=C(c3cn(COC(C)(C)C)c4ccccc34)CNC2=O)cc(OC)c1OC	4.60206	450.215	6	1	4.4803	TRUE
CHEMBL1828884	25030	nM	COc1ccc(CC(=O)NS(=O)(=O)c2ccc(Br)cc2)cc1	4.60154	382.983	4	1	2.5053	TRUE
CHEMBL91748	25710	nM	CN(C)/C=C/C(=O)Nc1ccc2ncnc(Nc3cccc(Br)c3)c2c1	4.5899	411.069	5	2	4.1497	TRUE
CHEMBL589847	25870	nM	O=C(NCc1ccccc1)c1ccc(N(CCCl)CCCl)cc1	4.5872	350.095	2	1	3.9006	TRUE
CHEMBL1829271	26330	nM	O=C(Cc1cccc(Br)c1)NS(=O)(=O)c1ccccc1	4.57955	352.972	3	1	2.4967	TRUE
CHEMBL589832	27190	nM	O=C(Nc1ccc([N+](=O)[O-])cc1)c1ccc(N(CCCl)CCCl)cc1	4.56559	381.065	4	1	4.1311	TRUE
CHEMBL1829275	27380	nM	O=C(Cc1cccc(Br)c1)NS(=O)(=O)c1ccc(Br)cc1	4.56257	430.883	3	1	3.2592	TRUE
CHEMBL91	27430	nM	Clc1ccc(COC(Cn2ccnc2)c2ccc(Cl)cc2Cl)c(Cl)c1	4.56177	413.986	3	0	6.4548	TRUE
CHEMBL591051	27830	nM	O=C1CSC(N/N=C/c2cccc(O)c2)=N1	4.55549	235.042	5	2	0.9451	TRUE
CHEMBL1829272	27890	nM	Cc1ccc(S(=O)(=O)NC(=O)Cc2cccc(Br)c2)cc1	4.55455	366.988	3	1	2.80512	TRUE
CHEMBL430845	29000	nM	COC1=CC(=O)C=CC1=O	4.5376	138.032	3	0	0.2247	TRUE
CHEMBL1828880	29070	nM	COc1ccc(CC(=O)NS(=O)(=O)c2ccccc2)cc1	4.53655	305.072	4	1	1.7428	TRUE
CHEMBL590083	30060	nM	CCCCNC(=O)c1ccc(N(CCCl)CCCl)cc1	4.52201	316.111	2	1	3.5005	TRUE
CHEMBL295316	30800	nM	CC1=CC(=O)c2c(O)cccc2C1=O	4.51145	188.047	3	1	1.7175	TRUE
CHEMBL592240	31000	nM	O=C1CSC(NN=C2CCCCCCC2)=N1	4.50864	239.109	4	1	2.3057	TRUE
CHEMBL209511	31000	nM	O=S(=O)(Nc1ccc(Cl)cc1O)c1ccccc1	4.50864	283.007	3	2	2.8464	TRUE
CHEMBL113996	31430	nM	COc1cc2ncc(C#N)c(Nc3ccc(F)c(Cl)c3)c2cc1NC(=O)/C=C/CN1CCOCC1	4.50266	495.147	7	2	4.47808	TRUE
CHEMBL238617	31600	nM	N#Cc1n[nH]nc1-c1ccc(F)cc1	4.50031	188.05	3	1	1.48248	TRUE
CHEMBL590568	31780	nM	Cc1cccc(/C=N/NC2=NC(=O)CS2)c1	4.49785	233.062	4	1	1.54792	TRUE
CHEMBL589413	32540	nM	CCCCN(Cc1cccc(Cl)c1O)C(=S)Nc1ccccc1	4.48758	348.106	2	2	5.0447	TRUE
CHEMBL246167	32730	nM	FC(F)(F)c1c[nH]c(-c2n[nH]cc2/C=C/c2cncc3ccccc23)n1	4.48505	355.104	3	2	4.5372	TRUE
CHEMBL116012	33950	nM	CCOc1cc2ncc(C#N)c(Nc3cccc(Br)c3)c2cc1NC(=O)/C=C/CN1CCOCC1	4.46916	535.122	7	2	4.83818	TRUE
CHEMBL114073	33950	nM	COc1cc2ncc(C#N)c(Nc3ccc(F)c(Cl)c3)c2cc1NC(=O)/C=C/C(C)N1CCOCC1	4.46916	509.163	7	2	4.86658	TRUE
CHEMBL55360	34000	nM	Cc1cccc(C)c1NC(=O)/C(C#N)=C/c1ccc(O)c(O)c1	4.46852	308.116	4	3	3.26032	TRUE
CHEMBL332497	34130	nM	COc1cc2ncc(C#N)c(Nc3cccc(Br)c3)c2cc1NC(=O)/C=C/CN1CCOCC1	4.46686	521.106	7	2	4.44808	TRUE
CHEMBL5172914	34720	nM	Cc1ccc(-c2ccc3c(ccn3Cc3coc(/C=C/c4ccc(C(F)(F)F)cc4)n3)c2)cc1	4.45942	458.161	3	0	7.84222	TRUE
CHEMBL55994	35000	nM	N#C/C(=C\c1ccc(O)c(O)c1)C(=O)c1cccs1	4.45593	271.03	5	2	2.94918	TRUE
CHEMBL53898	35000	nM	N#C/C(=C\c1ccc(O)c(O)c1)C(=O)NCCCc1ccccc1	4.45593	322.132	4	3	2.75378	TRUE
CHEMBL453336	36000	nM	COc1cc(C2=C(c3cn(COCc4ccccc4)c4ccccc34)CNC2=O)cc(OC)c1OC	4.4437	484.2	6	1	4.882	TRUE
CHEMBL1683952	36000	nM	Fc1cccc(COc2ccc(Nc3cc(-c4ccsc4)ncn3)cc2Cl)c1	4.4437	411.061	5	1	6.3202	TRUE
CHEMBL1172878	36450	nM	Cc1ncc([N+](=O)[O-])n1CCOC(=O)/C=C/c1ccccc1Cl	4.4383	335.067	6	0	3.00972	TRUE
CHEMBL240093	36500	nM	Cc1ccc(-c2n[nH]nc2C#N)cc1	4.43771	184.075	3	1	1.6518	TRUE
CHEMBL4095623	36900	nM	c1ccc(Cc2nnc(Cc3nc4ccccc4[nH]3)o2)cc1	4.43297	290.117	4	1	3.1275	TRUE
CHEMBL245966	37000	nM	CCNC(=O)c1cncc(/C=C/c2c[nH]nc2-c2nc3ccc(OC)cc3[nH]2)c1	4.4318	388.165	5	3	3.2767	TRUE
CHEMBL55979	37000	nM	CC(NC(=O)/C(C#N)=C/c1ccc(O)c(O)c1)c1ccccc1	4.4318	308.116	4	3	2.88218	TRUE
CHEMBL488811	37000	nM	COc1cc(C2=C(c3cn(COc4ccccc4)c4ccccc34)CNC2=O)cc(OC)c1OC	4.4318	470.184	6	1	4.7442	TRUE
CHEMBL591050	37640	nM	O=C1CSC(N/N=C/c2cccc([N+](=O)[O-])c2)=N1	4.42435	264.032	6	1	1.1477	TRUE
CHEMBL592224	37820	nM	Cc1cc(C)c(O)c(CN(Cc2ccc(F)cc2)C(=S)Nc2ccccc2)c1	4.42228	394.152	2	2	5.54734	TRUE
CHEMBL1828883	37930	nM	COc1ccc(CC(=O)NS(=O)(=O)c2ccc(Cl)cc2)cc1	4.42102	339.033	4	1	2.3962	TRUE
CHEMBL4575427	37930	nM	N=C1N=C(NCCS(=O)(=O)O)/C(=C/C(O)CNC(=O)c2cc(Br)c[nH]2)N1	4.42102	448.016	6	7	-0.83433	TRUE
CHEMBL600048	38230	nM	Cc1cccc(CN(Cc2ccc(F)cc2)C(=O)Nc2ccccc2)c1O	4.4176	364.159	2	2	5.07402	TRUE
CHEMBL606027	39510	nM	CCCCN(Cc1cccc(Br)c1O)C(=S)Nc1ccccc1	4.40329	392.056	2	2	5.1538	TRUE
CHEMBL602645	39640	nM	CCCN(CCC)C(=O)c1ccc(N(CCCl)CCCl)cc1	4.40187	344.142	2	0	4.2328	TRUE
CHEMBL591440	39780	nM	CCCCN(Cc1cc(Cl)cc(Cl)c1O)C(=S)Nc1ccccc1	4.40034	382.067	2	2	5.6981	TRUE
CHEMBL4068254	40000	nM	c1ccc(-c2nnc(Cc3nc4ccccc4[nH]3)o2)cc1	4.39794	276.101	4	1	3.2037	TRUE
CHEMBL1173789	40000	nM	Cc1ncc([N+](=O)[O-])n1CCOC(=O)/C=C/c1ccccc1[N+](=O)[O-]	4.39794	346.091	8	0	2.26452	TRUE
CHEMBL113690	40000	nM	CCCCn1c(Cc2cc(OC)c(OC)c(OC)c2)nc2c(N)ncnc21	4.39794	371.196	8	1	2.8252	TRUE
CHEMBL1172877	41260	nM	Cc1ncc([N+](=O)[O-])n1CCOC(=O)/C=C/c1ccccc1F	4.38447	319.097	6	0	2.49542	TRUE
CHEMBL31184	41503	nM	c1ccc2c(c1)cc1ccc3cccc4ccc2c1c34	4.38192	252.094	0	0	5.7372	TRUE
CHEMBL56731	42000	nM	N#C/C(=C\c1ccc(O)c(O)c1)C(=O)Nc1ccccc1	4.37675	280.085	4	3	2.64348	TRUE
CHEMBL589119	44510	nM	CCCCN(CCCC)C(=O)c1ccc(N(CCCl)CCCl)cc1	4.35154	372.174	2	0	5.013	TRUE
CHEMBL1172947	44850	nM	Cc1ncc([N+](=O)[O-])n1CCOC(=O)/C=C/c1ccccc1Br	4.34824	379.017	6	0	3.11882	TRUE
CHEMBL14326	45000	nM	Nc1ncnc2c1ncn2[C@@H]1O[C@H](CO)[C@@H](O)[C@H]1S	4.34679	283.074	9	4	-1.0425	TRUE
CHEMBL592141	45510	nM	COc1cccc(/C=N/NC2=NC(=O)CS2)c1	4.34189	249.057	5	1	1.2481	TRUE
CHEMBL4083493	45700	nM	Clc1ccc2nc(Cc3nnc(-c4ccccc4Cl)o3)[nH]c2c1	4.34008	344.023	4	1	4.5105	TRUE
CHEMBL589259	46100	nM	CC(C)(C)NC(=O)c1ccc(N(CCCl)CCCl)cc1	4.3363	316.111	2	1	3.4989	TRUE
CHEMBL4074782	46800	nM	Cc1ccccc1-c1nnc(Cc2nc3ccccc3[nH]2)o1	4.32975	290.117	4	1	3.51212	TRUE
CHEMBL589165	47000	nM	O=C1CSC(NN=C2CCCCCC2)=N1	4.3279	225.094	4	1	1.9156	TRUE
CHEMBL589503	48350	nM	O=C(NC1CCCC1)c1ccc(N(CCCl)CCCl)cc1	4.3156	328.111	2	1	3.643	TRUE
CHEMBL291986	49000	nM	N#C/C(=C\c1ccc(O)c(O)c1)C(=O)N1CCN(c2ccccc2)CC1	4.3098	349.143	5	2	2.35358	TRUE
CHEMBL55993	50000	nM	Cc1cc(C)c(C(=O)/C(C#N)=C/c2ccc(O)c(O)c2)c(C)c1	4.30103	307.121	4	2	3.81294	TRUE
CHEMBL201511	50000	nM	COc1cc(C2=C(c3c[nH]c4ccccc34)C(=O)NC2=O)cc(OC)c1OC	4.30103	378.122	5	2	2.7609	TRUE
CHEMBL4087921	52400	nM	c1ccc(OCc2nnc(Cc3nc4ccccc4[nH]3)o2)cc1	4.28067	306.112	5	1	3.1157	TRUE
CHEMBL4102942	52600	nM	Clc1ccc(-c2nnc(Cc3nc4ccc(Cl)cc4[nH]3)o2)c(Cl)c1	4.27901	377.984	4	1	5.1639	TRUE
CHEMBL269528	53500	nM	N#Cc1n[nH]nc1-c1ccccc1	4.27165	170.059	3	1	1.34338	TRUE
CHEMBL3133826	54800	nM	CCOc1cccc(Nc2ccnc3[nH]c4ccc(S(=O)(=O)N5CCOCC5)cc4c23)c1	4.26122	452.152	6	2	3.8793	TRUE
CHEMBL56219	57000	nM	N#C/C(=C\c1ccc(O)c(O)c1)C(=O)Nc1ccccc1Cl	4.24413	314.046	4	3	3.29688	TRUE
CHEMBL4102214	57600	nM	c1ccc(C(c2ccccc2)c2nnc(Cc3nc4ccccc4[nH]3)o2)cc1	4.23958	366.148	4	1	4.7169	TRUE
CHEMBL208433	61000	nM	CC1(C)CC2=Nc3ccccc3NC(c3cccc(O)c3O)C2=C(O)C1	4.21467	350.163	5	4	4.9692	TRUE
CHEMBL89505	64800	nM	CC(C)(C)c1cc(/C=C2\C(=O)Nc3ccccc32)cc(C(C)(C)C)c1O	4.18842	349.204	2	2	5.4799	TRUE
CHEMBL1683957	65000	nM	Cc1c(Nc2ccc(OCc3cccc(F)c3)c(Cl)c2)ncnc1-c1ccccc1	4.18709	419.12	4	1	6.56712	TRUE
CHEMBL104	66405	nM	Clc1ccccc1C(c1ccccc1)(c1ccccc1)n1ccnc1	4.1778	344.108	2	0	5.3767	TRUE
CHEMBL90277	66600	nM	Cc1cccc2c1/C(=C/c1ccc(N3CCOCC3)cc1)C(=O)N2	4.17653	320.152	3	1	3.32432	TRUE
CHEMBL315546	90200	nM	O=CN1CCN(c2ccc(/C=C3\C(=O)Nc4ccccc43)cc2)CC1	4.04479	333.148	3	1	2.4577	TRUE
CHEMBL3133834	91200	nM	COc1cccc(Nc2ccnc3[nH]c4ccc(Br)cc4c23)c1	4.04001	367.032	3	2	5.2308	TRUE
CHEMBL93464	91325	nM	C/C=C/C(=O)Nc1ccc2ncnc(Nc3cccc(Br)c3)c2c1	4.03941	382.043	4	2	4.6505	TRUE
CHEMBL86432	91400	nM	CSc1ccc(/C=C2\C(=O)Nc3cccc(C)c32)s1	4.03905	287.044	3	1	4.27112	TRUE
CHEMBL315701	92600	nM	O=C1Nc2ccccc2/C1=C/c1ccc(N2CCCCC2)cc1	4.03339	304.158	2	1	4.1696	TRUE
CHEMBL521155	95000	nM	Nc1ncnc2c1ncn2CC(=O)c1c[nH]c2ccccc12	4.02228	292.107	6	2	1.7727	TRUE
CHEMBL364272	120000	nM	Nc1ncnc2[nH]c(Sc3cc(Cl)ccc3Cl)nc12	3.92082	310.98	5	2	3.3931	TRUE
CHEMBL190654	310000	nM	CCCCn1c(S(=O)(=O)c2cc(OC)c(OC)c(OC)c2)nc2c(N)ncnc21	3.50864	421.142	10	1	2.0672	TRUE
