# Supplementary material for: AI-Driven Drug Discovery for Breast Cancer Based on ERBB2 Identified Through Network Pharmacology and GEO Data Analysis
Source: Research Square preprint supplement (doi:10.21203/rs.3.rs-6047847/v1), 2025-02-26
Supplement: Supplementary file 7 [file a7c47a295c9c9289fa1b6161.xlsx]

## Sheet: CNN
S5.CNN model screening for core genes
Gene	Importance
CASP3	0.0887589
BCL2	0.0765547
CREB1	0.0735462
JUN	0.0735022
CDK2	0.0731106
