# Supplementary material for: AI-Driven Drug Discovery for Breast Cancer Based on ERBB2 Identified Through Network Pharmacology and GEO Data Analysis
Source: Research Square preprint supplement (doi:10.21203/rs.3.rs-6047847/v1), 2025-02-26
Supplement: Supplementary file 8 [file c29558811819775a38e31dd7.xlsx]

## Sheet: 59compounds
S13. Compounds screening by AI algorithms
molecule_chembl_id	smiles	pIC50	active	fp
CHEMBL941	Cc1ccc(NC(=O)c2ccc(CN3CCN(C)CC3)cc2)cc1Nc1nccc(-c2cccnc2)n1	10.2218	1	[0 0 0 ... 0 0 0]
CHEMBL5221067	N#Cc1c(NC(=O)CNc2n[nH]c3ncccc23)sc2c1CCCC2	9.85387	1	[0 0 0 ... 0 0 0]
CHEMBL258282	CN1CCN(CCOc2n[nH]c3ncnc(Nc4ccc(OCc5ccccn5)c(Cl)c4)c23)CC1	9	1	[0 0 0 ... 0 0 0]
CHEMBL4067871	OC[C@H](Nc1cnc(-c2cc(Cl)ccc2O)c(-c2ccc3cnccc3c2)c1)c1ccccc1	9	1	[0 1 0 ... 0 0 0]
CHEMBL4105329	Cc1n[nH]c2ccc(-c3cc(N[C@@H](CO)c4ccccc4)cnc3-c3cc(Cl)ccc3O)cc12	9	1	[0 1 0 ... 0 0 0]
CHEMBL4075917	Cc1n[nH]c2ccc(-c3cc(N[C@@H](CO)c4ccccc4)cnc3-c3ccc(F)cc3O)cc12	9	1	[0 1 0 ... 0 0 0]
CHEMBL483332	C[C@H](CN(C)C)Oc1cccc2ncnc(Nc3ccc(OCc4cnccn4)c(Cl)c3)c12	9	1	[1 1 0 ... 0 0 0]
CHEMBL2048789	O=C1NCc2ccc(Oc3ccc(Nc4ncnc5ccn(CCO)c45)cc3Cl)cc21	8.88606	1	[0 0 0 ... 0 0 0]
CHEMBL2048795	O=C1Cc2cccc(Oc3ccc(Nc4ncnc5ccn(CCO)c45)cc3Cl)c2N1	8.82391	1	[0 0 0 ... 0 0 0]
CHEMBL2048906	CC(=O)NCCn1ccc2ncnc(Nc3ccc(Oc4cccc5sncc45)c(Cl)c3)c21	8.79588	1	[0 0 0 ... 0 0 0]
CHEMBL2048796	O=C1Cc2c(cccc2Oc2ccc(Nc3ncnc4ccn(CCO)c34)cc2Cl)N1	8.79588	1	[0 0 0 ... 0 0 0]
CHEMBL2048903	OCCn1ccc2ncnc(Nc3ccc(Oc4cccc5[nH]ncc45)c(Cl)c3)c21	8.76955	1	[0 0 0 ... 0 0 0]
CHEMBL2103842	C[C@@H]1COC(Nc2ccc3ncnc(Nc4ccc(OCc5nccs5)c(Cl)c4)c3c2)=N1	8.69897	1	[0 0 0 ... 0 0 0]
CHEMBL402553	Clc1cc(Nc2ncnc3[nH]nc(OCCN4CCCC4)c23)ccc1OCc1ccccn1	8.69897	1	[0 0 0 ... 0 0 0]
CHEMBL403569	O=C(CO)N1CCC[C@H]1COc1cccc2ncnc(Nc3ccc(OCc4ccccn4)c(Cl)c3)c12	8.69897	1	[0 0 0 ... 0 0 0]
CHEMBL518750	CC(C)(Oc1cccc2ncnc(Nc3ccc(OCc4ccccn4)c(Cl)c3)c12)C(N)=O	8.69897	1	[0 0 0 ... 0 0 0]
CHEMBL2048905	OCCn1ccc2ncnc(Nc3ccc(Oc4cccc5sncc45)c(Cl)c3)c21	8.67778	1	[0 0 0 ... 0 0 0]
CHEMBL2048904	Cn1ncc2c(Oc3ccc(Nc4ncnc5ccn(CCO)c45)cc3Cl)cccc21	8.67778	1	[0 0 0 ... 0 0 0]
CHEMBL2048788	CC(C)(C)NC(=O)c1cccc(Oc2ccc(Nc3ncnc4ccn(CCO)c34)cc2Cl)c1	8.63827	1	[0 0 0 ... 0 0 0]
CHEMBL2048794	O=C1NCc2cccc(Oc3ccc(Nc4ncnc5ccn(CCO)c45)cc3Cl)c21	8.60206	1	[0 0 0 ... 0 0 0]
CHEMBL2048797	OCCn1ccc2ncnc(Nc3ccc(Oc4cccc5[nH]ccc45)c(Cl)c3)c21	8.60206	1	[0 0 0 ... 0 0 0]
CHEMBL5203179	COCC(=O)NC/C=C/c1ccc2ncnc(Nc3ccc(Oc4cc5nncn5cn4)c(C)c3)c2c1	8.59346	1	[0 0 0 ... 0 0 0]
CHEMBL2148050	CS(=O)(=O)CC(=O)NCCn1ccc2ncnc(Nc3ccc(Oc4cccc(Cl)c4)c(Cl)c3)c21	8.5376	1	[0 0 0 ... 0 0 0]
CHEMBL2408045	CNC(=O)CN1CCC(Oc2cc3c(Nc4cccc(Cl)c4F)ncnc3cc2OC)CC1	8.52288	1	[0 0 0 ... 0 0 0]
CHEMBL257430	Clc1cc(Nc2ncnc3[nH]nc(OCCN4CCNCC4)c23)ccc1OCc1ccccn1	8.52288	1	[0 0 0 ... 0 0 0]
CHEMBL402339	COc1cc(Nc2ncnc3[nH]nc(OCCN4CCC(O)CC4)c23)ccc1OCc1cccc(F)c1	8.52288	1	[0 0 0 ... 0 0 0]
CHEMBL1923003	Cn1ccc2ncnc(Nc3ccc(Oc4cccc(Cl)c4)c(Cl)c3)c21	8.48149	1	[0 0 0 ... 0 0 0]
CHEMBL1645473	NC1CCN(Cc2ccn3ncnc(Nc4cccc(Cl)c4)c23)CC1	8.39794	1	[0 0 0 ... 0 0 0]
CHEMBL411897	COC1CCN(CCOc2n[nH]c3ncnc(Nc4ccc(OCc5ccccn5)c(Cl)c4)c23)CC1	8.39794	1	[0 0 0 ... 0 0 0]
CHEMBL257861	OCCOc1n[nH]c2ncnc(Nc3ccc(OCc4ccccn4)c(Cl)c3)c12	8.39794	1	[0 0 0 ... 0 0 0]
CHEMBL479171	OCc1ccc(-c2cc3c(Nc4ccc(OCc5ccccc5)cc4)ncnc3cn2)o1	8.39794	1	[0 0 0 ... 0 0 0]
CHEMBL249928	CN(CCOc1cccc2ncnc(Nc3ccc(OCc4ccccn4)c(Cl)c3)c12)C(=O)CO	8.39794	1	[0 0 0 ... 0 0 0]
CHEMBL1080506	Cc1c(C(=O)NCCN2CCOCC2)[nH]c2cnnc(Nc3ccc(OCc4cccc(F)c4)c(Cl)c3)c12	8.39794	1	[0 0 0 ... 0 0 0]
CHEMBL1645474	NC1CCN(Cc2ccn3ncnc(Nc4cccc(Br)c4)c23)CC1	8.39794	1	[0 0 0 ... 0 0 0]
CHEMBL2148051	CC(C(=O)NCCn1ccc2ncnc(Nc3ccc(Oc4cccc(Cl)c4)c(Cl)c3)c21)S(C)(=O)=O	8.38722	1	[0 1 0 ... 0 0 0]
CHEMBL1923006	OCCn1ccc2ncnc(Nc3ccc(Oc4cccc(Cl)c4)c(Cl)c3)c21	8.38722	1	[0 0 0 ... 0 0 0]
CHEMBL288812	Cn1nc(C(C)(C)C)cc1NC(=O)Nc1ccc(Cc2ccncc2)cc1	8.37675	1	[0 0 0 ... 0 0 0]
CHEMBL1923019	O=C(CO)NCCn1ccc2ncnc(Nc3ccc(Oc4cccc(C(F)(F)F)c4)c(Cl)c3)c21	8.36653	1	[0 0 0 ... 0 0 0]
CHEMBL1922999	Cc1cccc(Oc2ccc(Nc3ncnc4cc[nH]c34)cc2Cl)c1	8.33724	1	[0 0 0 ... 0 0 0]
CHEMBL1645470	Cc1cccc(Nc2ncnn3ccc(CN4CCC(N)CC4)c23)c1	8.30103	1	[0 0 0 ... 0 0 0]
CHEMBL257873	Cc1ccc(Oc2ccc(Nc3ncnc4[nH]nc(OCCN5CCC(O)CC5)c34)cc2F)cn1	8.30103	1	[0 0 0 ... 0 0 0]
CHEMBL403435	Cc1cc(Nc2ncnc3[nH]nc(OCCN4CCC(O)CC4)c23)ccc1OCc1ccccn1	8.30103	1	[0 0 0 ... 0 0 0]
CHEMBL404405	OC1CCN(CCOc2n[nH]c3ncnc(Nc4ccc(OCc5ccccn5)c(Cl)c4)c23)CC1	8.30103	1	[0 0 0 ... 0 0 0]
CHEMBL2048798	OCCn1ccc2ncnc(Nc3ccc(Oc4cccc5sccc45)c(Cl)c3)c21	8.22185	1	[0 0 0 ... 0 0 0]
CHEMBL256784	C[C@H](Oc1cccc2ncnc(Nc3ccc4c(cnn4Cc4cccc(F)c4)c3)c12)C(=O)N(C)C	8.22185	1	[0 1 0 ... 0 1 0]
CHEMBL1645472	NC1CCN(Cc2ccn3ncnc(Nc4cccc(F)c4)c23)CC1	8.22185	1	[0 0 0 ... 0 0 0]
CHEMBL1645471	Cc1ccc(Nc2ncnn3ccc(CN4CCC(N)CC4)c23)cc1	8.22185	1	[0 0 0 ... 0 0 0]
CHEMBL1645476	NC1CCN(Cc2ccn3ncnc(Nc4ccc(F)c(Cl)c4)c23)CC1	8.22185	1	[0 0 0 ... 0 0 0]
CHEMBL587723	CCN1CCN(Cc2ccc(-c3cc4c(N[C@H](C)c5ccccc5)ncnc4[nH]3)cc2)CC1	8.22185	1	[0 1 0 ... 0 0 0]
CHEMBL4796265	CN1CCN(CC(=O)Nc2ccc3ncnc(Nc4ccc(OCc5cccc(F)c5)c(Cl)c4)c3c2)CC1	8.21467	1	[0 0 0 ... 0 0 0]
CHEMBL1093234	O=C(Nc1cccc(-c2nc3sccn3c2-c2ccnc(Nc3ccccc3)n2)c1)c1ccccc1	8.20066	1	[0 0 0 ... 0 0 0]
CHEMBL2148044	CS(=O)(=O)CC(=O)NCCn1ccc2ncnc(Nc3ccc(Oc4cccc(C(F)(F)F)c4)c(Cl)c3)c21	8.20066	1	[0 0 0 ... 0 0 0]
CHEMBL3989868	Cc1cc(Nc2ncnc3ccc(NC4=NC(C)(C)CO4)cc23)ccc1Oc1ccn2ncnc2c1	8.16115	1	[0 0 0 ... 0 0 0]
CHEMBL256783	C[C@@H](Oc1cccc2ncnc(Nc3ccc4c(cnn4Cc4cccc(F)c4)c3)c12)C(=O)N(C)C	8.09691	1	[0 1 0 ... 0 1 0]
CHEMBL1922901	N#Cc1ccccc1Oc1ccc(Nc2ncnc3cc[nH]c23)cc1Cl	8.09691	1	[0 0 0 ... 0 0 0]
CHEMBL1922902	N#Cc1cccc(Oc2ccc(Nc3ncnc4cc[nH]c34)cc2Cl)c1	8.08619	1	[0 0 0 ... 0 0 0]
CHEMBL1921812	Clc1cccc(Oc2ccc(Nc3ncnc4cc[nH]c34)cc2Cl)c1	8.08092	1	[0 0 0 ... 0 0 0]
CHEMBL1645467	NC1CCN(Cc2ccn3ncnc(Nc4ccccc4)c23)CC1	8.04576	1	[0 0 0 ... 0 0 0]
CHEMBL1922898	Fc1ccccc1Oc1ccc(Nc2ncnc3cc[nH]c23)cc1Cl	8.03152	1	[0 0 0 ... 0 0 0]
