# Supplementary material for: AI-Driven Drug Discovery for Breast Cancer Based on ERBB2 Identified Through Network Pharmacology and GEO Data Analysis
Source: Research Square preprint supplement (doi:10.21203/rs.3.rs-6047847/v1), 2025-02-26
Supplement: Supplementary file 9 [file dc0f0470cae35c0a6de9bedb.xlsx]

## Sheet: 483compounds
S9. Compounds not matching RO5
molecule_chembl_id	IC50	units	smiles	pIC50	molecular_weight	n_hba	n_hbd	logp	ro5_fulfilled
CHEMBL3344216	0.5	nM	CN(C)[C@H](CS(C)(=O)=O)c1ccc(-c2ccc3ncnc(Nc4ccc(OCc5cccc(F)c5)c(Cl)c4)c3c2)o1	9.30103	594.15	8	1	6.6522	FALSE
CHEMBL2048911	0.92	nM	Cl.O=C(NCCn1ccc2ncnc(Nc3ccc(Oc4cccc5sncc45)c(Cl)c3)c21)[C@@H]1CCCN1	9.03621	569.117	9	3	5.5203	FALSE
CHEMBL5282641	0.96	nM	C=CC(=O)N1CCC(Oc2cc3c(Nc4ccc(Cl)c(Cl)c4F)ncnc3cc2O[C@H]2CCOC2)CC1	9.01773	546.124	7	1	5.5428	FALSE
CHEMBL2048912	0.98	nM	CC(C)(N)C(=O)NCCn1ccc2ncnc(Nc3ccc(Oc4cccc5sncc45)c(Cl)c3)c21	9.00877	521.14	9	3	5.0838	FALSE
CHEMBL490062	1	nM	CS(=O)(=O)CCNCc1ccc(-c2ccc3ncnc(Nc4ccc5c(cnn5Cc5ccccc5)c4)c3c2)o1	9	552.194	9	2	5.1656	FALSE
CHEMBL3344210	1	nM	CNC(CS(C)(=O)=O)c1ccc(-c2ccc3ncnc(Nc4ccc(OCc5cccc(F)c5)c(Cl)c4)c3c2)o1	9	580.135	8	2	6.31	FALSE
CHEMBL3357637	1.38	nM	CCOc1cc2ncnc(Nc3ccc(OCc4ccccn4)c(Cl)c3)c2cc1NC(=O)/C(F)=C/CN(C)C	8.86012	550.19	8	2	5.753	FALSE
CHEMBL5184610	1.67	nM	CCOc1cc2ncnc(Nc3ccc(Oc4cc5nncn5cn4)c(C)c3)c2cc1NC(=O)/C=C/[C@H]1CCCN1C	8.77728	565.255	11	2	4.89942	FALSE
CHEMBL5192750	1.7	nM	Cc1cc(Nc2ncnc3cc(O)c(NC(=O)/C=C/[C@H]4CCCN4C)cc23)ccc1Oc1ccn2ccnc2c1	8.76955	535.233	9	3	5.41632	FALSE
CHEMBL4786257	1.9	nM	C=CC(=O)Nc1cc(-c2c[nH]c3ncnc(Nc4ccc(OCc5ccccn5)c(Cl)c4)c23)ccc1OCCO	8.72125	556.163	8	4	5.4915	FALSE
CHEMBL1630117	2	nM	O=C(NO)c1ccc(-c2ccc3ncnc(Nc4ccc(OCc5cccc(F)c5)c(Cl)c4)c3c2)o1	8.69897	504.1	7	3	6.1239	FALSE
CHEMBL2048909	2	nM	CC(C)(C(=O)NCCn1ccc2ncnc(Nc3ccc(Oc4cccc5sncc45)c(Cl)c3)c21)S(C)(=O)=O	8.69897	584.107	10	2	5.1697	FALSE
CHEMBL2048907	2.2	nM	CC(C)(O)C(=O)NCCn1ccc2ncnc(Nc3ccc(Oc4cccc5sncc45)c(Cl)c3)c21.CS(=O)(=O)O	8.65758	618.112	11	4	4.6214	FALSE
CHEMBL3344215	2.9	nM	CS(=O)(=O)C[C@@H](N)c1ccc(-c2ccc3ncnc(Nc4ccc(OCc5cccc(F)c5)c(Cl)c4)c3c2)o1	8.5376	566.119	8	2	6.0493	FALSE
CHEMBL2048908	3.3	nM	CC(C)(CO)C(=O)NCCn1ccc2ncnc(Nc3ccc(Oc4cccc5sncc45)c(Cl)c3)c21	8.48149	536.14	9	3	5.365	FALSE
CHEMBL5176854	3.38	nM	CCOc1cc2ncnc(Nc3ccc(Oc4cc5nncn5cn4)c(C)c3)c2cc1NC(=O)/C(F)=C/[C@@H]1CCCN1C	8.47108	583.246	11	2	5.19662	FALSE
CHEMBL3344209	3.4	nM	CS(=O)(=O)CC(N)c1ccc(-c2ccc3ncnc(Nc4ccc(OCc5cccc(F)c5)c(Cl)c4)c3c2)o1	8.46852	566.119	8	2	6.0493	FALSE
CHEMBL1630118	3.5	nM	O=C(NO)c1ccc(-c2ccc3ncnc(Nc4ccc(OCc5cccc(F)c5)c(Cl)c4)c3c2)s1	8.45593	520.077	7	3	6.5924	FALSE
CHEMBL1630108	3.5	nM	O=C(/C=C/c1ccc(-c2ccc3ncnc(Nc4ccc(OCc5cccc(F)c5)c(Cl)c4)c3c2)s1)NO	8.45593	546.093	7	3	6.992	FALSE
CHEMBL5178703	3.51	nM	CCOc1cc2ncnc(Nc3ccc(Oc4cc5nncn5cn4)c(C)c3)c2cc1NC(=O)/C(F)=C/[C@H]1CCCN1C	8.45469	583.246	11	2	5.19662	FALSE
CHEMBL3344208	3.6	nM	CN(C)C(CS(C)(=O)=O)c1ccc(-c2ccc3ncnc(Nc4ccc(OCc5cccc(F)c5)c(Cl)c4)c3c2)o1	8.4437	594.15	8	1	6.6522	FALSE
CHEMBL5181694	3.68	nM	CCOc1cc2ncnc(Nc3ccc(Oc4cc5nncn5cn4)c(C)c3)c2cc1NC(=O)/C(F)=C\[C@@H]1CCCN1C	8.43415	583.246	11	2	5.19662	FALSE
CHEMBL4794670	3.7	nM	C=CC(=O)Nc1cc2c(Nc3ccc(OCc4cccc(F)c4)c(Cl)c3)ncnc2cc1OCc1cn(CCCC(=O)NO)nn1	8.4318	646.186	11	4	5.3255	FALSE
CHEMBL4758842	3.7	nM	C=CC(=O)Nc1cc2c(Nc3ccc(OCc4cccc(F)c4)c(Cl)c3)ncnc2cc1OCc1cn(CCC(=O)NO)nn1	8.4318	632.17	11	4	4.9354	FALSE
CHEMBL4758761	3.8	nM	C=CC(=O)Nc1cc2c(Nc3ccc(OCc4cccc(F)c4)c(Cl)c3)ncnc2cc1OCc1cn(CCCCC(=O)NO)nn1	8.42022	660.201	11	4	5.7156	FALSE
CHEMBL4757592	3.9	nM	C=CC(=O)Nc1cccc(-c2c(-c3ccc(N4CCN(C)CC4)cc3)[nH]c3ncnc(Nc4ccc(O)cc4)c23)c1	8.40894	545.254	7	4	5.6174	FALSE
CHEMBL2437226	3.9	nM	Cc1ccc(S(=O)(=O)O)cc1.NS(=O)(=O)CCNCc1ccc(-c2ccc3ncnc(Nc4ccc(OCc5cccc(F)c5)c(Cl)c4)c3c2)o1	8.40894	753.149	10	4	6.62472	FALSE
CHEMBL4635100	4	nM	O=C(/C=C/CN1CCCC1)N1CCOc2cc3ncnc(Nc4ccc(OCc5cccc(F)c5)c(Cl)c4)c3cc21	8.39794	573.194	7	1	6.1223	FALSE
CHEMBL4648271	4	nM	CCN(CC)C/C=C/C(=O)N1CCOc2cc3ncnc(Nc4ccc(OCc5cccc(F)c5)c(Cl)c4)c3cc21	8.39794	575.21	7	1	6.3683	FALSE
CHEMBL1630107	4.1	nM	O=C(/C=C/c1ccc(-c2ccc3ncnc(Nc4ccc(OCc5cccc(F)c5)c(Cl)c4)c3c2)o1)NO	8.38722	530.116	7	3	6.5235	FALSE
CHEMBL1090357	4.3	nM	CN(C)CCc1ccc(Nc2nccc(-c3c(-c4cccc(NC(=O)c5c(F)cccc5F)c4)nc4sccn34)n2)cc1	8.36653	595.197	8	2	6.898	FALSE
CHEMBL4743509	4.5	nM	C=CC(=O)Nc1cccc(-c2c(-c3ccc(N4CCN(C)CC4)cc3)[nH]c3ncnc(Nc4ccc(OC(c5ccccc5)c5ccccc5)cc4)c23)c1	8.34679	711.332	7	3	9.0802	FALSE
CHEMBL4781593	4.5	nM	C=CC(=O)Nc1cccc(-c2c[nH]c3ncnc(Nc4ccc(OCN5C(=O)c6ccccc6C5=O)cc4)c23)c1	8.34679	530.17	7	3	5.1255	FALSE
CHEMBL1630116	4.7	nM	Nc1ccccc1NC(=O)CCc1ccc(-c2ccc3ncnc(Nc4ccc(OCc5cccc(F)c5)c(Cl)c4)c3c2)cc1	8.3279	617.199	6	3	8.5654	FALSE
CHEMBL1090350	4.8	nM	O=C(Nc1cccc(-c2nc3sccn3c2-c2ccnc(Nc3ccc(N4CCOCC4)cc3)n2)c1)c1ccccc1	8.31876	573.195	9	2	6.3523	FALSE
CHEMBL1630112	4.9	nM	Nc1ccccc1NC(=O)c1ccc(-c2ccc3ncnc(Nc4ccc(OCc5cccc(F)c5)c(Cl)c4)c3c2)s1	8.3098	595.125	7	3	8.3079	FALSE
CHEMBL3890186	5	nM	COCCOc1cc2ncnc(Nc3ccc4c(cnn4Cc4ccccc4)c3)c2cc1NC(=O)/C=C/CN1CCCC1	8.30103	577.28	9	2	5.3871	FALSE
CHEMBL444619	5	nM	COc1cc(ON2CCC(C)CC2)c2c(Nc3ccc(OCc4ccccn4)c(Cl)c3)ncnc2c1	8.30103	505.188	8	1	6.0351	FALSE
CHEMBL593860	5	nM	COc1cc2c(Nc3ccc(-c4nc5ccccc5s4)c(OC)c3)ncnc2cc1OCCCN1CCN(C)CC1	8.30103	570.241	10	1	5.6836	FALSE
CHEMBL1201179	5	nM	CS(=O)(=O)CCNCc1ccc(-c2ccc3ncnc(Nc4ccc(OCc5cccc(F)c5)c(Cl)c4)c3c2)o1.Cc1ccc(S(=O)(=O)O)cc1.Cc1ccc(S(=O)(=O)O)cc1.O	8.30103	942.184	12	4	7.79784	FALSE
CHEMBL4763836	5.4	nM	Cc1cccc(Oc2ccc(Nc3ncnc4ccc(NC(=O)CN5CCN(C)CC5)cc34)cc2Cl)c1	8.26761	516.204	7	2	5.31342	FALSE
CHEMBL1630111	5.7	nM	Nc1ccccc1NC(=O)c1ccc(-c2ccc3ncnc(Nc4ccc(OCc5cccc(F)c5)c(Cl)c4)c3c2)o1	8.24413	579.147	7	3	7.8394	FALSE
CHEMBL1923020	5.7	nM	CN(CCn1ccc2ncnc(Nc3ccc(Oc4cccc(C(F)(F)F)c4)c(Cl)c3)c21)C(=O)CO	8.24413	519.129	7	2	5.0901	FALSE
CHEMBL480349	6	nM	CS(=O)(=O)CCNCc1ccc(-c2cc3c(Nc4ccc(OCc5cccc(F)c5)c(Cl)c4)ncnc3s2)o1	8.22185	586.091	9	2	6.2006	FALSE
CHEMBL2048910	6.1	nM	CC(C)(C)C(=O)NCCn1ccc2ncnc(Nc3ccc(Oc4cccc5sncc45)c(Cl)c3)c21.CS(=O)(=O)O	8.21467	616.133	10	3	5.8966	FALSE
CHEMBL5201973	6.42	nM	Cc1cc(Nc2ncnc3cc(O)c(NC(=O)/C=C/[C@H]4CCCN4C)cc23)ccc1Oc1ccc2nccn2c1	8.19246	535.233	9	3	5.41632	FALSE
CHEMBL3436359	6.8	nM	CC(=O)N1CCN(Cc2ccc(-c3ccc4ncnc(Nc5ccc(OCc6cccc(F)c6)c(Cl)c5)c4c3)o2)CC1.Cc1ccc(S(=O)(=O)O)cc1	8.16749	757.214	9	2	7.91072	FALSE
CHEMBL231102	7	nM	Cc1cc(Nc2ncnc3cnc(N4CCOCC4)cc23)ccc1OC1CCN(C(=O)Nc2c(F)cccc2F)CC1	8.1549	575.246	8	2	5.26692	FALSE
CHEMBL3290148	7	nM	C=CC(=O)NCC(=O)Nc1cccc(Nc2ncc(NC(=O)c3cc(NC(=O)c4cccc(C(F)(F)F)c4)ccc3C)cn2)c1	8.1549	617.2	7	5	5.29272	FALSE
CHEMBL2148048	7.1	nM	CC(C(=O)NCCn1ccc2ncnc(Nc3ccc(Oc4cccc(C(F)(F)F)c4)c(Cl)c3)c21)S(C)(=O)=O	8.14874	581.111	8	2	5.1887	FALSE
CHEMBL1090359	7.2	nM	O=C(Nc1cccc(-c2nc3sccn3c2-c2ccnc(Nc3ccc4c(c3)CCNC4)n2)c1)c1c(F)cccc1F	8.14267	579.165	8	3	6.4396	FALSE
CHEMBL5170965	7.3	nM	CCOc1cc2ncnc(Nc3ccc(Oc4cc5nncn5cn4)c(C)c3)c2cc1NC(=O)/C(F)=C\[C@H]1CCCN1C	8.13668	583.246	11	2	5.19662	FALSE
CHEMBL1257998	7.5	nM	CN1CCN([C@H]2CC[C@H](n3nc(-c4ccc(Nc5nc6cccc(Cl)c6o5)cc4)c4c(N)ncnc43)CC2)CC1	8.12494	557.242	10	2	5.3448	FALSE
CHEMBL179363	8	nM	CCOc1cc2ncc(C#N)c(Nc3ccc(OCc4cccc(Cl)c4)c(Cl)c3)c2cc1NC(=O)/C=C/CN(C)C	8.09691	589.165	7	2	7.19088	FALSE
CHEMBL458098	8	nM	COc1cc(Nc2ncnc3ccc(-c4ccc(CN5C[C@@H]6[C@H](CO)[C@@H]6C5)cc4)cc23)ccc1Oc1ccccc1	8.09691	544.247	7	2	6.5114	FALSE
CHEMBL4793731	8.3	nM	CN1CCN(CCCOc2ccc3ncnc(Nc4ccc(OCc5cccc(F)c5)c(Cl)c4)c3c2)CC1	8.08092	535.215	7	1	5.7612	FALSE
CHEMBL1923011	8.4	nM	OCCOCCn1ccc2ncnc(Nc3ccc(Oc4cccc(OC(F)(F)F)c4)c(Cl)c3)c21	8.07572	508.113	8	2	5.5281	FALSE
CHEMBL2148045	8.5	nM	CCS(=O)(=O)CC(=O)NCCn1ccc2ncnc(Nc3ccc(Oc4cccc(C(F)(F)F)c4)c(Cl)c3)c21	8.07058	581.111	8	2	5.1903	FALSE
CHEMBL2437224	8.5	nM	C[S+]([O-])CCNCc1ccc(-c2ccc3ncnc(Nc4ccc(OCc5cccc(F)c5)c(Cl)c4)c3c2)o1.Cc1ccc(S(=O)(=O)O)cc1	8.07058	736.159	9	3	7.71472	FALSE
CHEMBL2437227	8.6	nM	Cc1ccc(S(=O)(=O)O)cc1.O=S(=O)(CCNCc1ccc(-c2ccc3ncnc(Nc4ccc(OCc5cccc(F)c5)c(Cl)c4)c3c2)o1)CC(F)(F)F	8.0655	820.142	10	3	8.31332	FALSE
CHEMBL1630113	8.7	nM	Nc1ccccc1NC(=O)/C=C/c1ccc(-c2ccc3ncnc(Nc4ccc(OCc5cccc(F)c5)c(Cl)c4)c3c2)o1	8.06048	605.163	7	3	8.239	FALSE
CHEMBL545315	9	nM	C=CC(=O)Nc1cc2c(Nc3ccc(F)c(Cl)c3)ncnc2cc1OCCCN1CCOCC1.Cl.Cl	8.04576	557.116	7	2	5.2351	FALSE
CHEMBL554	9	nM	CS(=O)(=O)CCNCc1ccc(-c2ccc3ncnc(Nc4ccc(OCc5cccc(F)c5)c(Cl)c4)c3c2)o1	8.04576	580.135	8	2	6.1391	FALSE
CHEMBL3647420	9.07	nM	CCOc1cc2ncc(C#N)c(Nc3ccc(OCc4ccccn4)c(Cl)c3)c2cc1NC(=O)/C=C/[C@H]1CCCN1C	8.04239	582.215	8	2	6.46508	FALSE
CHEMBL4760739	9.3	nM	C=CC(=O)Nc1cc(-c2c[nH]c3ncnc(Nc4ccc(OCc5ccccn5)c(Cl)c4)c23)ccc1OCCCO	8.03152	570.178	8	4	5.8816	FALSE
CHEMBL1923014	9.4	nM	OCCSCCn1ccc2ncnc(Nc3ccc(Oc4cccc(C(F)(F)F)c4)c(Cl)c3)c21	8.02687	508.095	7	2	6.3649	FALSE
CHEMBL4439338	9.6	nM	COc1cc2ncnc(Nc3ccc(OCc4cccc(F)c4)c(Cl)c3)c2cc1OCCCN1CCNCCNCC1	8.01773	594.252	9	3	5.0172	FALSE
CHEMBL1256425	9.8	nM	CC(C)N1CCN([C@H]2CC[C@H](n3nc(-c4ccc(Nc5nc6cccc(Cl)c6o5)cc4)c4c(N)ncnc43)CC2)CC1	8.00877	585.273	10	2	6.1234	FALSE
CHEMBL453376	10	nM	CS(=O)(=O)CCNCc1nc(-c2ccc3ncnc(Nc4ccc(OCc5cccc(F)c5)c(Cl)c4)c3c2)cs1	8	597.107	9	2	6.0026	FALSE
CHEMBL514436	10	nM	CS(=O)(=O)CCNCCCCOc1ccc2ncnc(Nc3ccc(OCc4cccc(F)c4)c(Cl)c3)c2c1	8	572.166	8	2	5.5381	FALSE
CHEMBL3962365	10	nM	CCOc1cc2ncnc(Nc3ccc(OCc4cccc(F)c4)c(Cl)c3)c2cc1NC(=O)/C=C/CN1CCCC1	8	575.21	7	2	6.7341	FALSE
CHEMBL598799	10.1	nM	COc1cc2ncnc(Nc3ccc(OCc4cccc(F)c4)c(Cl)c3)c2cc1OCCCCCCC(=O)NO	7.99568	568.189	8	3	6.5882	FALSE
CHEMBL3344220	10.6	nM	CS(=O)(=O)C[C@H](N)c1ccc(-c2ccc3ncnc(Nc4ccc(OCc5cccc(F)c5)c(Cl)c4)c3c2)o1	7.97469	566.119	8	2	6.0493	FALSE
CHEMBL4591886	10.94	nM	CCOCCOc1cc2ncnc(Nc3ccc(F)c(Cl)c3)c2cc1NC(=O)/C=C/CN(CC)CC	7.96098	515.21	7	2	5.4177	FALSE
CHEMBL2148052	11	nM	CC(C)(C(=O)NCCn1ccc2ncnc(Nc3ccc(Oc4cccc(Cl)c4)c(Cl)c3)c21)S(C)(=O)=O	7.95861	561.1	8	2	5.2134	FALSE
CHEMBL4795165	11	nM	C=CC(=O)Nc1cccc(-c2c[nH]c3ncnc(Nc4ccc(CN5C(=O)c6ccccc6C5=O)cc4)c23)c1	7.95861	514.175	6	3	5.2892	FALSE
CHEMBL3890526	11	nM	COc1cc(Nc2ncnc3ccc(-c4ccc(CN5C[C@@H]6[C@@H](CO)[C@@H]6C5)cc4)cc23)ccc1Oc1ccccc1	7.95861	544.247	7	2	6.5114	FALSE
CHEMBL1630109	11	nM	O=C(/C=C/c1cccc(-c2ccc3ncnc(Nc4ccc(OCc5cccc(F)c5)c(Cl)c4)c3c2)c1)NO	7.95861	540.136	6	3	6.9305	FALSE
CHEMBL2148053	11	nM	CC(C)(C(=O)NCCn1ccc2ncnc(Nc3ccc(Oc4cccc(Cl)c4)c(Cl)c3)c21)S(C)(=O)=O.Cc1ccc(S(=O)(=O)O)cc1	7.95861	733.12	10	3	6.45512	FALSE
CHEMBL2148046	11	nM	CC(C)S(=O)(=O)CC(=O)NCCn1ccc2ncnc(Nc3ccc(Oc4cccc(C(F)(F)F)c4)c(Cl)c3)c21	7.95861	595.127	8	2	5.5788	FALSE
CHEMBL1923016	12	nM	O=S(=O)(CCO)CCn1ccc2ncnc(Nc3ccc(Oc4cccc(C(F)(F)F)c4)c(Cl)c3)c21	7.92082	540.085	8	2	5.0465	FALSE
CHEMBL1923017	12	nM	Cc1cc2ncnc(Nc3ccc(Oc4cccc(C(F)(F)F)c4)c(Cl)c3)c2n1CCOCCO	7.92082	506.133	7	2	5.95672	FALSE
CHEMBL3932176	12	nM	CCOc1cc2ncnc(Nc3ccc4c(cnn4Cc4ccccc4)c3)c2cc1NC(=O)/C=C/CN(C)C	7.92082	521.254	8	2	5.2264	FALSE
CHEMBL4800516	12	nM	C=CC(=O)Nc1cccc(-c2c(-c3ccc(N4CCN(C)CC4)cc3)[nH]c3ncnc(Nc4ccc(OCN5C(=O)c6ccccc6C5=O)cc4)c23)c1	7.92082	704.286	9	3	6.5443	FALSE
CHEMBL2441563	12	nM	O=C(/C=C/CN1CCOCC1)N1CCOc2cc3ncnc(Nc4ccc(OCc5cccc(F)c5)c(Cl)c4)c3cc21	7.92082	589.189	8	1	5.3587	FALSE
CHEMBL4643111	12	nM	CN1CCN(C/C=C/C(=O)N2CCOc3cc4ncnc(Nc5ccc(OCc6cccc(F)c6)c(Cl)c5)c4cc32)CC1	7.92082	602.221	8	1	5.2739	FALSE
CHEMBL1630110	12	nM	O=C(/C=C/c1ccc(-c2ccc3ncnc(Nc4ccc(OCc5cccc(F)c5)c(Cl)c4)c3c2)cc1)NO	7.92082	540.136	6	3	6.9305	FALSE
CHEMBL4782561	12	nM	O=C(Nc1ccc2ncnc(Nc3ccc(Oc4cccc(F)c4)c(Cl)c3)c2c1)c1ccc(CNCCO)cc1	7.92082	557.163	7	4	6.2924	FALSE
CHEMBL1923015	12	nM	[O-][S+](CCO)CCn1ccc2ncnc(Nc3ccc(Oc4cccc(C(F)(F)F)c4)c(Cl)c3)c21	7.92082	524.09	7	2	5.3804	FALSE
CHEMBL3814812	12.1	nM	Fc1cccc(COc2ccc(Nc3ncnc4ccc(NC(=S)NCCCN5CCOCC5)cc34)cc2Cl)c1	7.91721	580.182	7	3	5.7536	FALSE
CHEMBL3436356	12.3	nM	Cc1ccc(S(=O)(=O)O)cc1.Fc1cccc(COc2ccc(Nc3ncnc4ccc(-c5ccc(CN6CCNCC6)o5)cc34)cc2Cl)c1	7.91009	715.203	9	3	7.65182	FALSE
CHEMBL446250	13	nM	COc1ccccc1Cc1nc2ccc(-c3nn([C@H]4CC[C@H](N5CCN(CC6CC6)CC5)CC4)c4ncnc(N)c34)cc2[nH]1	7.88606	591.343	9	2	5.0625	FALSE
CHEMBL367492	13	nM	CCOc1cc2ncc(C#N)c(Nc3ccc(Sc4nc(-c5ccccc5)cs4)c(Cl)c3)c2cc1NC(=O)/C=C/CN(C)C	7.88606	640.148	9	2	8.23318	FALSE
CHEMBL4750655	13	nM	C=CC(=O)Nc1cccc(-c2c(-c3ccc(N4CCN(C)CC4)cc3)[nH]c3ncnc(Nc4ccc(OC(=O)C(c5ccccc5)N5Cc6ccccc6C5=O)cc4)c23)c1	7.88606	794.333	9	3	8.2145	FALSE
CHEMBL3436354	13.1	nM	Cc1ccc(S(=O)(=O)O)cc1.Fc1cccc(COc2ccc(Nc3ncnc4ccc(-c5ccc(CN6CCOCC6)o5)cc34)cc2Cl)c1	7.88273	716.187	9	2	8.07882	FALSE
CHEMBL1256431	13.8	nM	COCCCN1CCC(N2CCC(n3nc(-c4ccc(Nc5nc6cccc(Cl)c6o5)cc4)c4c(N)ncnc43)CC2)CC1	7.86012	615.284	11	2	5.7515	FALSE
CHEMBL4756368	14	nM	C=CC(=O)Nc1cc(-c2c[nH]c3ncnc(Nc4ccc5c(cnn5Cc5ccccc5)c4)c23)ccc1OCCO	7.85387	545.218	8	4	5.2621	FALSE
CHEMBL4751089	14	nM	C=CC(=O)Nc1cc(-c2c[nH]c3ncnc(Nc4ccc(OCc5ccccn5)c(Cl)c4)c23)ccc1OC(C)COC	7.85387	584.194	8	3	6.5341	FALSE
CHEMBL4740834	14	nM	C=CC(=O)Nc1cccc(-c2c[nH]c3ncnc(Nc4ccc(OCc5cccc(F)c5)c(Cl)c4)c23)c1	7.85387	513.137	5	3	6.8645	FALSE
CHEMBL160846	14	nM	CS(=O)(=O)CCNc1nc(-c2ccc3ncnc(Nc4ccc(OCc5ccccc5)c(Cl)c4)c3c2)cs1	7.85387	565.101	9	2	6.1858	FALSE
CHEMBL2148047	14	nM	CC(C)(C)S(=O)(=O)CC(=O)NCCn1ccc2ncnc(Nc3ccc(Oc4cccc(C(F)(F)F)c4)c(Cl)c3)c21	7.85387	609.142	8	2	5.9689	FALSE
CHEMBL155761	14	nM	CS(=O)(=O)CCNc1nc(-c2ccc3ncnc(Nc4ccc(OCc5cccc(F)c5)c(Cl)c4)c3c2)cs1	7.85387	583.091	9	2	6.3249	FALSE
CHEMBL1090358	14	nM	CCN1CCN(c2ccc(Nc3nccc(-c4c(-c5cccc(NC(=O)c6c(F)cccc6F)c5)nc5sccn45)n3)cc2)CC1	7.85387	636.223	9	2	6.9358	FALSE
CHEMBL1630114	14	nM	Nc1ccccc1NC(=O)/C=C/c1cccc(-c2ccc3ncnc(Nc4ccc(OCc5cccc(F)c5)c(Cl)c4)c3c2)c1	7.85387	615.184	6	3	8.646	FALSE
CHEMBL4757450	14	nM	C=CC(=O)Nc1cccc(-c2c(-c3ccc(N4CCN(C)CC4)cc3)[nH]c3ncnc(Nc4ccc(OCc5ccccn5)c(Cl)c4)c23)c1	7.85387	670.257	8	3	7.5392	FALSE
CHEMBL3436357	14.4	nM	CCOC(=O)N1CCN(Cc2ccc(-c3ccc4ncnc(Nc5ccc(OCc6cccc(F)c6)c(Cl)c5)c4c3)o2)CC1.Cc1ccc(S(=O)(=O)O)cc1	7.84164	787.224	10	2	8.52072	FALSE
CHEMBL1258231	14.5	nM	CN1CCC(N2CCC(n3nc(-c4ccc(Nc5nc6cccc(Cl)c6o5)cc4)c4c(N)ncnc43)CC2)CC1	7.83863	557.242	10	2	5.3448	FALSE
CHEMBL1923021	15	nM	CC(C)(O)C(=O)NCCn1ccc2ncnc(Nc3ccc(Oc4cccc(C(F)(F)F)c4)c(Cl)c3)c21	7.82391	533.144	7	3	5.5265	FALSE
CHEMBL4757145	15	nM	C=CC(=O)Nc1cc(-c2c[nH]c3ncnc(Nc4ccc(OCc5ccccn5)c(Cl)c4)c23)ccc1OCCN(C)C	7.82391	583.21	8	3	6.0608	FALSE
CHEMBL1630115	15	nM	Nc1ccccc1NC(=O)/C=C/c1ccc(-c2ccc3ncnc(Nc4ccc(OCc5cccc(F)c5)c(Cl)c4)c3c2)cc1	7.82391	615.184	6	3	8.646	FALSE
CHEMBL1256430	15.1	nM	CC(C)N1CCC(N2CCC(n3nc(-c4ccc(Nc5nc6cccc(Cl)c6o5)cc4)c4c(N)ncnc43)CC2)CC1	7.82102	585.273	10	2	6.1234	FALSE
CHEMBL1256435	15.4	nM	CN1CCN([C@H]2CC[C@H](n3nc(-c4ccc(Nc5nc6cccc(Cl)c6o5)cc4Cl)c4c(N)ncnc43)CC2)CC1	7.81248	591.203	10	2	5.9982	FALSE
CHEMBL3344211	15.5	nM	CCNC(CS(C)(=O)=O)c1ccc(-c2ccc3ncnc(Nc4ccc(OCc5cccc(F)c5)c(Cl)c4)c3c2)o1	7.80967	594.15	8	2	6.7001	FALSE
CHEMBL2437225	15.9	nM	CS(=O)(=O)NCCNCc1ccc(-c2ccc3ncnc(Nc4ccc(OCc5cccc(F)c5)c(Cl)c4)c3c2)o1.Cc1ccc(S(=O)(=O)O)cc1	7.7986	767.165	10	4	6.88542	FALSE
CHEMBL1256432	16	nM	CN1CCN([C@H]2CC[C@H](n3nc(-c4ccc(Nc5nc6cccc(Cl)c6o5)c(F)c4)c4c(N)ncnc43)CC2)CC1	7.79588	575.232	10	2	5.4839	FALSE
CHEMBL5202846	16.01	nM	Cc1cc(Nc2ncnc3cc(O)c(NC(=O)/C=C/[C@H]4CCCN4C)cc23)ccc1Oc1cnn2cnnc2c1	7.79561	537.224	11	3	4.20632	FALSE
CHEMBL3911796	16.4	nM	O=C(CCCCCCn1cc(-c2ccc3ncnc(Nc4ccc(OCc5cccc(F)c5)c(Cl)c4)c3c2)nn1)NO	7.78516	589.2	9	3	6.4593	FALSE
CHEMBL2148049	17	nM	CC(C)(C(=O)NCCn1ccc2ncnc(Nc3ccc(Oc4cccc(C(F)(F)F)c4)c(Cl)c3)c21)S(C)(=O)=O	7.76955	595.127	8	2	5.5788	FALSE
CHEMBL215171	17	nM	CS(=O)(=O)CCOCc1ccc(-c2ccc3ncnc(Nc4ccc(OCc5cccc(F)c5)c(Cl)c4)c3c2)o1	7.76955	581.119	8	1	6.5661	FALSE
CHEMBL1614725	17	nM	CC(C)(O)CC(=O)NCCn1ccc2ncnc(Nc3ccc(Oc4cccc(C(F)(F)F)c4)c(Cl)c3)c21	7.76955	547.16	7	3	5.9166	FALSE
CHEMBL212954	18	nM	[O-][S+]1CCN(Cc2ccc(-c3ccc4ncnc(Nc5ccc(OCc6cccc(F)c6)c(Cl)c5)c4c3)o2)CC1	7.74473	576.14	7	1	6.5692	FALSE
CHEMBL230891	18	nM	COCC(=O)NCC#Cc1ccc2ncnc(Nc3ccc(Oc4cccc(C(=O)NC(C)(C)C)c4)c(C)c3)c2c1	7.74473	551.253	7	3	5.11652	FALSE
CHEMBL1934623	18	nM	Cc1ncnc(Nc2ccc(OCc3cccc(F)c3)c(Cl)c2)c1C#Cc1ccc(CNC(C)C)cc1	7.74473	514.194	5	2	6.79792	FALSE
CHEMBL2437223	18.3	nM	CSCCNCc1ccc(-c2ccc3ncnc(Nc4ccc(OCc5cccc(F)c5)c(Cl)c4)c3c2)o1.Cc1ccc(S(=O)(=O)O)cc1	7.73755	720.164	9	3	8.69922	FALSE
CHEMBL3290142	19	nM	C=CC(=O)Nc1cccc(Nc2ncc(NC(=O)c3cc(NC(=O)c4cccc(C(F)(F)F)c4)ccc3C)cn2)c1	7.72125	560.178	6	4	6.17652	FALSE
CHEMBL231101	19	nM	COc1cc2ncnc(Nc3ccc(OC4CCN(C(=O)Nc5c(F)cccc5F)CC4)c(C)c3)c2cc1OC	7.72125	549.219	7	2	6.05252	FALSE
CHEMBL1683967	19	nM	Cc1ncnc(Nc2ccc(OCc3cccc(F)c3)c(Cl)c2)c1/C=C(\F)C(=O)NCCN1CCCC1	7.72125	527.19	6	2	5.42252	FALSE
CHEMBL4290869	19	nM	CC(C)(O)CC(=O)NCCc1ccc2ncnc(Nc3ccc(Oc4cccc(C(F)(F)F)c4)c(Cl)c3)c2c1	7.72125	558.165	6	3	6.6576	FALSE
CHEMBL1923018	19	nM	N#Cc1cc2ncnc(Nc3ccc(Oc4cccc(C(F)(F)F)c4)c(Cl)c3)c2n1CCOCCO	7.72125	517.113	8	2	5.51998	FALSE
CHEMBL3941823	19	nM	CCOc1cc2ncnc(Nc3ccc4c(cnn4Cc4ccccc4)c3)c2cc1NC(=O)/C=C/CN1C[C@@H](C)N[C@@H](C)C1	7.72125	590.312	9	3	5.347	FALSE
CHEMBL3923228	19	nM	CCOc1cc2ncnc(Nc3ccc4c(cnn4Cc4ccccc4)c3)c2cc1NC(=O)/C=C/CN1CCCC1	7.72125	547.27	8	2	5.7606	FALSE
CHEMBL3942228	19	nM	CCOc1cc2ncnc(Nc3ccc4c(cnn4Cc4ccccc4)c3)c2cc1NC(=O)/C=C/CN1CCCCC1	7.72125	561.285	8	2	6.1507	FALSE
CHEMBL3814021	19.2	nM	O=C(NCCN1CCCCC1)Nc1ccc2ncnc(Nc3ccc(OCc4cccc(F)c4)c(Cl)c3)c2c1	7.7167	548.21	6	3	6.3523	FALSE
CHEMBL3436358	19.8	nM	CS(=O)(=O)N1CCN(Cc2ccc(-c3ccc4ncnc(Nc5ccc(OCc6cccc(F)c6)c(Cl)c5)c4c3)o2)CC1.Cc1ccc(S(=O)(=O)O)cc1	7.70333	793.181	10	2	7.32382	FALSE
CHEMBL466586	20	nM	CNC(=O)O[C@H]1CN[C@H](C#Cc2cc3ncnc(Nc4ccc(OCc5cccc(F)c5)c(Cl)c4)c3s2)C1	7.69897	551.119	8	3	5.2444	FALSE
CHEMBL3939985	20	nM	CCOc1cc2ncnc(Nc3ccc(OCc4cccc(F)c4)c(Cl)c3)c2cc1NC(=O)/C=C/CN1CCN(C)CC1	7.69897	604.236	8	2	5.8857	FALSE
CHEMBL212251	20	nM	CCCN(CCS(C)(=O)=O)Cc1ccc(-c2ccc3ncnc(Nc4ccc(OCc5cccc(F)c5)c(Cl)c4)c3c2)o1	7.69897	622.182	8	1	7.2615	FALSE
CHEMBL466174	20	nM	CCNC(=O)O[C@H]1CN[C@@H](C#Cc2cc3ncnc(Nc4ccc(OCc5cccc(F)c5)c(Cl)c4)c3s2)C1	7.69897	565.135	8	3	5.6345	FALSE
CHEMBL375671	21	nM	Cc1cc(Nc2ncnc3cnc(N4CCOCC4)cc23)ccc1Oc1ccc(C(=O)NCC(C)(C)C)cc1	7.67778	526.269	8	2	5.48162	FALSE
CHEMBL3409483	21	nM	[O-][S+]1CCN(Cc2ccc(-c3cc4c(Nc5ccc(OCc6cccc(F)c6)cc5)ncnc4cn3)o2)CC1	7.67778	543.174	8	1	5.3108	FALSE
CHEMBL398172	21	nM	Cc1cc(Nc2ncnc3cnc(N(C)C)cc23)ccc1OC1CCN(C(=O)Nc2c(F)cccc2F)CC1	7.67778	533.235	7	2	5.49632	FALSE
CHEMBL1256429	21.5	nM	CN(C)C(=O)CN1CCN([C@H]2CC[C@H](n3nc(-c4ccc(Nc5nc6cccc(Cl)c6o5)cc4)c4c(N)ncnc43)CC2)CC1	7.66756	628.279	11	2	4.8032	FALSE
CHEMBL1256427	21.5	nM	COCCCN1CCN([C@H]2CC[C@H](n3nc(-c4ccc(Nc5nc6cccc(Cl)c6o5)cc4)c4c(N)ncnc43)CC2)CC1	7.66756	615.284	11	2	5.7515	FALSE
CHEMBL384407	22	nM	CS(=O)(=O)CCN(CC#N)Cc1ccc(-c2ccc3ncnc(Nc4ccc(OCc5cccc(F)c5)c(Cl)c4)c3c2)o1	7.65758	619.146	9	1	6.37508	FALSE
CHEMBL380247	22	nM	CS(=O)(=O)CCNCc1ccc(-c2ccc3ncnc(Nc4ccc(OCc5ccccc5)c(Cl)c4)c3c2)o1	7.65758	562.144	8	2	6	FALSE
CHEMBL212965	23	nM	[O-][S+]1CCN(Cc2ccc(-c3ccc4ncnc(Nc5ccc(OCc6ccccc6)c(Cl)c5)c4c3)o2)CC1	7.63827	558.149	7	1	6.4301	FALSE
CHEMBL4110258	23	nM	CN(C)CC/C=C/C(=O)Nc1cc2c(Nc3ccc(F)c(Cl)c3)ncnc2cc1OC[C@]12COC[C@H]1C2	7.63827	525.194	7	2	5.0276	FALSE
CHEMBL4751894	23	nM	C=CC(=O)Nc1cc(-c2c[nH]c3ncnc(Nc4ccc(CN5C(=O)c6ccccc6C5=O)cc4)c23)ccc1OCCN(C)C	7.63827	601.244	8	3	5.2296	FALSE
CHEMBL3436355	23.7	nM	CN1CCN(Cc2ccc(-c3ccc4ncnc(Nc5ccc(OCc6cccc(F)c6)c(Cl)c5)c4c3)o2)CC1.Cc1ccc(S(=O)(=O)O)cc1	7.62525	729.219	9	2	7.99402	FALSE
CHEMBL2348417	24	nM	O=C(NCCO)C1=Cc2c(ncnc2Nc2ccc(Oc3cccc4sccc34)c(Cl)c2)NCC1	7.61979	507.113	8	4	5.1881	FALSE
CHEMBL597569	24	nM	COCCOc1cc2ncnc(Nc3ccc(F)c(Cl)c3)c2cc1OCCCCCCC(=O)NO	7.61979	506.173	8	3	5.0258	FALSE
CHEMBL214487	24	nM	CC(C)S(=O)(=O)CCNCc1ccc(-c2ccc3ncnc(Nc4ccc(OCc5cccc(F)c5)c(Cl)c4)c3c2)o1	7.61979	608.166	8	2	6.9177	FALSE
CHEMBL214689	25	nM	CS(=O)(=O)CCNCc1ccc(-c2ccc3ncnc(Nc4ccc(OCc5ccccc5)c(Br)c4)c3c2)o1	7.60206	606.094	8	2	6.1091	FALSE
CHEMBL231302	25	nM	CNc1cc2c(Nc3ccc(OC4CCN(C(=O)Nc5c(F)cccc5F)CC4)c(C)c3)ncnc2cn1	7.60206	519.219	7	3	5.47202	FALSE
CHEMBL4743066	26	nM	C=CC(=O)Nc1cccc(-c2c[nH]c3ncnc(Nc4ccc(OC(c5ccccc5)c5ccccc5)cc4)c23)c1	7.58503	537.216	5	3	7.6614	FALSE
CHEMBL265367	26	nM	Cn1ccnc1S(=O)(=O)CCNCc1ccc(-c2ccc3ncnc(Nc4ccc(OCc5cccc(F)c5)c(C(F)(F)F)c4)c3c2)o1	7.58503	680.183	10	2	6.6673	FALSE
CHEMBL383965	26	nM	CCCS(=O)(=O)CCNCc1ccc(-c2ccc3ncnc(Nc4ccc(OCc5cccc(F)c5)c(Cl)c4)c3c2)o1	7.58503	608.166	8	2	6.9193	FALSE
CHEMBL4753389	26	nM	C=CC(=O)Nc1cccc(-c2c(-c3ccc(N4CCN(C)CC4)cc3)[nH]c3ncnc(OCC(C)C)c23)c1	7.58503	510.274	6	2	5.203	FALSE
CHEMBL213342	26	nM	CS(=O)(=O)CCNCc1ccc(-c2ccc3ncnc(Nc4ccc(OCc5ccccc5)cc4)c3c2)o1	7.58503	528.183	8	2	5.3466	FALSE
CHEMBL3344221	26.1	nM	CN(C)[C@@H](CS(C)(=O)=O)c1ccc(-c2ccc3ncnc(Nc4ccc(OCc5cccc(F)c5)c(Cl)c4)c3c2)o1	7.58336	594.15	8	1	6.6522	FALSE
CHEMBL402798	27	nM	Cc1ccc(Oc2ccc(Nc3ncnc4cccc(O[C@H](C)C(=O)N5CCOCC5)c34)cc2Cl)cn1	7.56864	519.167	8	1	5.14862	FALSE
CHEMBL231205	27	nM	COCCOc1ccc2ncnc(Nc3ccc(OC4CCN(C(=O)Nc5c(F)cccc5F)CC4)c(C)c3)c2c1	7.56864	563.234	7	2	6.06052	FALSE
CHEMBL212250	28	nM	O=S(=O)(CCOCc1ccc(-c2ccc3ncnc(Nc4ccc(OCc5cccc(F)c5)c(Cl)c4)c3c2)o1)c1ccccc1	7.55284	643.134	8	1	7.9954	FALSE
CHEMBL160303	28	nM	CS(=O)(=O)CCNc1nc(-c2ccc3ncnc(Nc4ccc5c(cnn5Cc5ccccc5)c4)c3c2)cs1	7.55284	555.151	10	2	5.3514	FALSE
CHEMBL206782	29	nM	COC(=O)CCCC(=O)Nc1cccc(C#Cc2cncnc2Nc2ccc(OCc3cccc(F)c3)c(Cl)c2)c1	7.5376	572.163	7	2	6.2733	FALSE
CHEMBL1256433	29	nM	CN1CCN([C@H]2CC[C@H](n3nc(-c4ccc(Nc5nc6cccc(Cl)c6o5)c(Cl)c4)c4c(N)ncnc43)CC2)CC1	7.5376	591.203	10	2	5.9982	FALSE
CHEMBL2348418	30	nM	CS(=O)(=O)CCNC(=O)C1=Cc2c(ncnc2Nc2ccc(Oc3cccc4sccc34)c(Cl)c2)NCC1	7.52288	569.096	9	3	5.2404	FALSE
CHEMBL1794063	30	nM	O=S(=O)(CCNCc1ccc(-c2ccc3ncnc(Nc4ccc(OCc5cccc(F)c5)c(Cl)c4)c3c2)o1)c1ccccc1	7.52288	642.15	8	2	7.5684	FALSE
CHEMBL1934632	30	nM	Cc1ncnc(Nc2ccc(OCc3cccc(F)c3)c(Cl)c2)c1/C=C/c1ccc(CNC(C)C)cc1	7.52288	516.209	5	2	7.56852	FALSE
CHEMBL214023	30	nM	O=S(=O)(CCNCc1ccc(-c2ccc3ncnc(Nc4ccc(OCc5cccc(F)c5)c(C(F)(F)F)c4)c3c2)o1)c1ccccn1	7.52288	677.172	9	2	7.3288	FALSE
CHEMBL3890751	30	nM	CCOc1cc2ncnc(Nc3ccc4c(ccn4S(=O)(=O)c4ccccc4)c3)c2cc1NC(=O)/C=C/CN1CCCC1	7.52288	596.221	9	2	5.5543	FALSE
CHEMBL3950966	30	nM	CCOc1cc2ncnc(Nc3ccc4c(cnn4Cc4ccccc4)c3)c2cc1NC(=O)/C=C/CN(C(C)C)C(C)C	7.52288	577.317	8	2	6.7836	FALSE
CHEMBL213818	31	nM	CS(=O)(=O)CCNCc1ccc(-c2ccc3ncnc(Nc4ccc(OCc5cccc(F)c5)cc4)c3c2)o1	7.50864	546.174	8	2	5.4857	FALSE
CHEMBL474431	31	nM	CS(=O)(=O)CCNCc1cc(-c2cc3ncnc(Nc4ccc(OCc5cccc(F)c5)c(Cl)c4)c3s2)cs1	7.50864	602.068	9	2	6.6691	FALSE
CHEMBL461869	32	nM	CCNC(=O)O[C@@H]1CN[C@@H](C#Cc2cc3ncnc(Nc4ccc(OCc5cccc(F)c5)c(Cl)c4)c3s2)C1	7.49485	565.135	8	3	5.6345	FALSE
CHEMBL450109	32	nM	O=C(O[C@@H]1CN[C@@H](C#Cc2cc3ncnc(Nc4ccc(OCc5cccc(F)c5)c(Cl)c4)c3s2)C1)N1CCOCC1	7.49485	607.146	9	2	5.3572	FALSE
CHEMBL451513	32	nM	O=C(O[C@H]1CN[C@H](C#Cc2cc3ncnc(Nc4ccc(OCc5cccc(F)c5)c(Cl)c4)c3s2)C1)N1CCCC1	7.49485	591.151	8	2	6.1208	FALSE
CHEMBL596087	32	nM	COc1cc2c(Nc3ccc(-c4nc5ccccc5s4)c(C)c3)ncnc2cc1OCCCN1CCN(C)CC1	7.49485	554.246	9	1	5.98342	FALSE
CHEMBL517585	32	nM	CCN(C)C(=O)O[C@H]1CN[C@H](C#Cc2cc3ncnc(Nc4ccc(OCc5cccc(F)c5)c(Cl)c4)c3s2)C1	7.49485	579.151	8	2	5.9767	FALSE
CHEMBL381080	32	nM	CS(=O)(=O)CCC(=O)Nc1cccc(C#Cc2cncnc2Nc2ccc(OCc3cccc(F)c3)c(Cl)c2)c1	7.49485	578.119	7	2	5.3647	FALSE
CHEMBL3813728	33.1	nM	Fc1cccc(COc2ccc(Nc3ncnc4ccc(NC(=S)NCCN5CCOCC5)cc34)cc2Cl)c1	7.48017	566.167	7	3	5.3635	FALSE
CHEMBL1093815	35	nM	O=C(Nc1cccc(-c2nc3sccn3c2-c2ccnc(Nc3ccccc3)n2)c1)c1ccccc1Cl	7.45593	522.103	7	2	7.1691	FALSE
CHEMBL215716	35	nM	[O-][S+]1CCN(Cc2ccc(-c3ccc4ncnc(Nc5ccc(OCc6ccccc6)c(F)c5)c4c3)o2)CC1	7.45593	542.179	7	1	5.9158	FALSE
CHEMBL1683974	36	nM	CCN1CCN(CCCC#Cc2c(C)ncnc2Nc2ccc(OCc3cccc(F)c3)c(Cl)c2)CC1	7.4437	521.236	6	1	5.66932	FALSE
CHEMBL228976	36	nM	Cc1cc(Nc2ncnc3cnc(N4CCCC4)cc23)ccc1Oc1ccc(C(=O)NCC(C)(C)C)cc1	7.4437	510.274	7	2	6.24522	FALSE
CHEMBL593274	38	nM	COc1cc2c(Nc3ccc(-c4nc5ccccc5s4)c(Cl)c3)ncnc2cc1OCCCN1CCN(C)CC1	7.42022	574.192	9	1	6.3284	FALSE
CHEMBL1928950	38	nM	N#CCC(=O)Nc1cccc(Oc2cc(Nc3ccc(OCc4cccc(F)c4)c(Cl)c3)ncn2)c1	7.42022	503.116	7	2	6.23618	FALSE
CHEMBL3899132	38	nM	CCOc1cc2ncnc(Nc3ccc4c(ccn4S(=O)(=O)c4ccccc4)c3)c2cc1NC(=O)/C=C/CN(C)C	7.42022	570.205	9	2	5.0201	FALSE
CHEMBL212201	38	nM	O=S(=O)(CCCCNCc1ccc(-c2ccc3ncnc(Nc4ccc(OCc5ccccc5)c(Cl)c4)c3c2)o1)c1ccccc1	7.42022	652.191	8	2	8.2095	FALSE
CHEMBL495734	38	nM	CC(=O)N1CCC[C@@H]1C#Cc1cc2ncnc(Nc3ccc(OCc4cccc(F)c4)c(Cl)c3)c2s1	7.42022	520.114	6	1	6.1688	FALSE
CHEMBL3217993	39	nM	Nc1ccccc1NC(=O)c1ccc(COc2ccc3ncnc(Nc4cccc(Br)c4)c3c2)cc1	7.40894	539.096	6	3	6.5494	FALSE
CHEMBL466412	40	nM	CN(C)C(=O)O[C@@H]1CN[C@@H](C#Cc2cc3ncnc(Nc4ccc(OCc5cccc(F)c5)c(Cl)c4)c3s2)C1	7.39794	565.135	8	2	5.5866	FALSE
CHEMBL447365	40	nM	O=C(O[C@@H]1CN[C@H](C#Cc2cc3ncnc(Nc4ccc(OCc5cccc(F)c5)c(Cl)c4)c3s2)C1)N1CCOCC1	7.39794	607.146	9	2	5.3572	FALSE
CHEMBL3814940	40.6	nM	Fc1cccc(COc2ccc(Nc3ncnc4ccc(NC(=S)NCCN5CCCCC5)cc34)cc2Cl)c1	7.39147	564.187	6	3	6.5172	FALSE
CHEMBL1934625	41	nM	Cc1ncnc(Nc2ccc(OCc3cccc(F)c3)c(Cl)c2)c1C#Cc1ccc(CN(C)C)cc1	7.38722	500.178	5	1	6.36152	FALSE
CHEMBL1934624	41	nM	Cc1ncnc(Nc2ccc(OCc3cccc(F)c3)c(Cl)c2)c1C#Cc1ccc(CN2CCCC2)cc1	7.38722	526.194	5	1	6.89572	FALSE
CHEMBL3981551	42	nM	CN(C)C/C=C/C(=O)Nc1cc2c(Nc3ccc(OCc4cccc(F)c4)c(Cl)c3)ncnc2cn1	7.37675	506.163	7	2	5.1962	FALSE
CHEMBL1928952	42	nM	Nc1cc(Nc2cccc(Oc3cc(Nc4ccc(OCc5cccc(F)c5)c(Cl)c4)ncn3)c2)ncn1	7.37675	529.143	9	3	6.4998	FALSE
CHEMBL4754658	43	nM	C=CC(=O)Nc1cccc(-c2c(-c3ccc(N4CCN(C)CC4)cc3)[nH]c3ncnc(Nc4ccc(NC(=O)C(c5ccccc5)N5Cc6ccccc6C5=O)cc4)c23)c1	7.36653	793.349	8	4	8.2476	FALSE
CHEMBL512076	43	nM	CCNC(=O)O[C@H]1CN[C@H](C#Cc2cc3ncnc(Nc4ccc(OCc5cccc(F)c5)c(Cl)c4)c3s2)C1	7.36653	565.135	8	3	5.6345	FALSE
CHEMBL228275	44	nM	COCCOc1ccc2ncnc(Nc3ccc(OC4CCN(C(=O)C5CCCC5)CC4)c(C)c3)c2c1	7.35655	504.274	7	1	5.26702	FALSE
CHEMBL3986103	45	nM	CCOc1cc2ncnc(Nc3ccc(NS(=O)(=O)c4ccccc4)cc3)c2cc1NC(=O)/C=C/CN1CCCC1	7.34679	572.221	8	3	5.1634	FALSE
CHEMBL208358	45	nM	CS(=O)(=O)Nc1cccc(C#Cc2cncnc2Nc2ccc(OCc3cccc(F)c3)c(Cl)c2)c1	7.34679	522.093	6	2	5.363	FALSE
CHEMBL231204	46	nM	COc1ccc2ncnc(Nc3ccc(OC4CCN(C(=O)Nc5c(F)cccc5F)CC4)c(C)c3)c2c1	7.33724	519.208	6	2	6.04392	FALSE
CHEMBL593911	47	nM	COc1cc2ncnc(Nc3ccc(-c4nc5ccccc5s4)c(OC)c3)c2cc1OCCCN1CCN(C)CC1	7.3279	570.241	10	1	5.6836	FALSE
CHEMBL422347	48	nM	CS(=O)(=O)CCNc1nc(-c2ccc3ncnc(Nc4ccc(OCc5ccccc5)cc4)c3c2)cs1	7.31876	531.14	9	2	5.5324	FALSE
CHEMBL3344213	48.3	nM	CC(C)NC(CS(C)(=O)=O)c1ccc(-c2ccc3ncnc(Nc4ccc(OCc5cccc(F)c5)c(Cl)c4)c3c2)o1	7.31605	608.166	8	2	7.0886	FALSE
CHEMBL3938869	50	nM	COc1cc2c(Nc3ccc(Br)c(Cl)c3)ncnc2cc1O[C@@H]1CO[C@H]2[C@@H]1OC[C@@H]2C(F)(F)F	7.30103	559.012	7	1	5.5214	FALSE
CHEMBL3962487	50	nM	COc1cc2c(Nc3ccc(Br)c(Cl)c3F)ncnc2cc1OC[C@@H]1CN2CCC[C@H]2CO1	7.30103	536.063	7	1	5.179	FALSE
CHEMBL3909626	50	nM	COc1cc2c(Nc3ccc(Cl)c(Cl)c3)ncnc2cc1OCCN1C(=O)c2ccccc2C1=O	7.30103	508.071	7	1	5.3638	FALSE
CHEMBL3895424	50	nM	COc1cc2c(Nc3ccc(Br)c(Cl)c3Cl)ncnc2cc1O[C@@H]1C[C@H]2OC[C@H](OC)[C@H]2O1	7.30103	554.996	8	1	5.3589	FALSE
CHEMBL505626	50	nM	CCN(CC)C(=O)O[C@H]1CN[C@H](C#Cc2cc3ncnc(Nc4ccc(OCc5cccc(F)c5)c(Cl)c4)c3s2)C1	7.30103	593.166	8	2	6.3668	FALSE
CHEMBL3968522	50	nM	COc1cc2c(Nc3cc(Cl)c(Br)cc3F)ncnc2cc1OC[C@@H]1CN2CCC[C@H]2CO1	7.30103	536.063	7	1	5.179	FALSE
CHEMBL3981432	50	nM	COc1cc2c(Nc3ccc(Br)c(Cl)c3Cl)ncnc2cc1OCC1CN(C)C(C)(C)CO1	7.30103	554.049	7	1	5.9393	FALSE
CHEMBL3930406	50	nM	COc1cc2c(Nc3ccc(Cl)c(Cl)c3)ncnc2cc1OCc1csc(C2CCCN(C)C2)n1	7.30103	529.111	8	1	6.5335	FALSE
CHEMBL3923153	50	nM	COc1cc2c(Nc3ccc(Cl)c(Cl)c3)ncnc2cc1OCC1CN(CCCCCC#N)CCO1	7.30103	529.165	8	1	5.85238	FALSE
CHEMBL3958678	50	nM	COc1cc2c(Nc3ccc(Cl)c(Cl)c3)ncnc2cc1OCc1csc(N2CCN(C)CC2)n1	7.30103	530.106	9	1	5.4761	FALSE
CHEMBL3898088	50	nM	COc1cc2c(Nc3ccc(Cl)c(Cl)c3)ncnc2cc1OCc1csc(C2CCN(C)CC2)n1	7.30103	529.111	8	1	6.5335	FALSE
CHEMBL3924998	50	nM	COc1cc2c(Nc3ccc(Br)c(Cl)c3Cl)ncnc2cc1OC[C@@H]1CN2CCC[C@H]2CO1	7.30103	552.033	7	1	5.6933	FALSE
CHEMBL3972712	50	nM	COc1cc2c(Nc3cc(Cl)c(Br)cc3F)ncnc2cc1OCC1CN(C)C(C)(C)CO1	7.30103	538.078	7	1	5.425	FALSE
CHEMBL3977503	50	nM	COc1cc2c(Nc3ccc(Br)c(Cl)c3Cl)ncnc2cc1OCC1CN(C)CCO1	7.30103	526.017	7	1	5.1607	FALSE
CHEMBL207247	52	nM	CC(=O)NCc1cccc(C#Cc2cncnc2Nc2ccc(OCc3cccc(F)c3)c(Cl)c2)c1	7.284	500.142	5	2	5.6276	FALSE
CHEMBL3344214	52.2	nM	CS(=O)(=O)CCNC(CS(C)(=O)=O)c1ccc(-c2ccc3ncnc(Nc4ccc(OCc5cccc(F)c5)c(Cl)c4)c3c2)o1	7.28233	672.128	10	2	5.7248	FALSE
CHEMBL3904257	53	nM	O=C(/C=C/CN1CCCC1)Nc1cc2c(Nc3ccc(OCc4cccc(F)c4)c(Cl)c3)ncnc2cn1	7.27572	532.179	7	2	5.7304	FALSE
CHEMBL3436360	53.3	nM	CN1CCN(C(=O)c2ccc(-c3ccc4ncnc(Nc5ccc(OCc6cccc(F)c6)c(Cl)c5)c4c3)o2)CC1.Cc1ccc(S(=O)(=O)O)cc1	7.27327	743.198	9	2	7.63422	FALSE
CHEMBL448929	54	nM	CCc1cc(Nc2nccc(-c3c(-c4cccc(C(=O)Nc5c(F)cccc5F)c4)nc4ccccn34)n2)c(OC)cc1N1CCC(N2CCN(S(C)(=O)=O)CC2)CC1	7.26761	821.328	11	2	6.8494	FALSE
CHEMBL2374458	54	nM	COc1ccccc1Cc1nc2ccc(-c3nn([C@H]4CC[C@H](C5CCN(C)CC5)CC4)c4ncnc(N)c34)cc2[nH]1	7.26761	550.317	8	2	5.6243	FALSE
CHEMBL2374457	54	nM	COCCCN1CCC([C@H]2CC[C@H](n3nc(-c4ccc5nc(Cc6ccccc6Cl)[nH]c5c4)c4c(N)ncnc43)CC2)CC1	7.26761	612.309	8	2	6.6758	FALSE
CHEMBL1090364	55	nM	O=C(Cc1ccccc1)Nc1cccc(-c2nc3sccn3c2-c2ccnc(Nc3ccc4c(c3)CCNC4)n2)c1	7.25964	557.2	8	3	6.0903	FALSE
CHEMBL4740009	55	nM	C=CC(=O)Nc1cccc(-c2c(-c3ccc(N4CCN(C)CC4)cc3)[nH]c3ncnc(Nc4ccc(CN5C(=O)c6ccccc6C5=O)cc4)c23)c1	7.25964	688.291	8	3	6.708	FALSE
CHEMBL388483	55	nM	Cc1cc(Nc2ncnc3ccc(OCCCN4CCOCC4)cc23)ccc1OC1CCN(C(=O)Nc2c(F)cccc2F)CC1	7.25964	632.292	8	2	6.13642	FALSE
CHEMBL3344212	58.6	nM	CS(=O)(=O)CC(NC1CCCCC1)c1ccc(-c2ccc3ncnc(Nc4ccc(OCc5cccc(F)c5)c(Cl)c4)c3c2)o1	7.2321	648.197	8	2	8.0129	FALSE
CHEMBL4578466	59	nM	CCOc1cc2ncc(C#N)c(Nc3ccc(OCc4ccccn4)c(F)c3)c2cc1NC(=O)/C=C/CN(C)C	7.22915	540.229	8	2	5.41818	FALSE
CHEMBL3092325	59	nM	CCOc1cc2ncc(C#N)c(Nc3ccc(OCc4ccccn4)cc3)c2cc1NC(=O)/C=C/CN(C)C	7.22915	522.238	8	2	5.27908	FALSE
CHEMBL180022	59	nM	CCOc1cc2ncc(C#N)c(Nc3ccc(OCc4ccccn4)c(Cl)c3)c2cc1NC(=O)/C=C/CN(C)C	7.22915	556.199	8	2	5.93248	FALSE
CHEMBL508760	60	nM	O=C(O[C@H]1CN[C@H](C#Cc2cc3ncnc(Nc4ccc(OCc5cscn5)c(Cl)c4)c3s2)C1)N1CCOCC1	7.22185	596.107	11	2	4.6746	FALSE
CHEMBL4250540	60	nM	CO[C@H]1/C=C\C=C(/C)C(=O)NC2=CC(=O)C(NCCCCNC3=C4C[C@@H](C)C[C@H](OC)[C@H](O)[C@@H](C)/C=C(\C)[C@H](OC(N)=O)[C@@H](OC)/C=C\C=C(/C)C(=O)NC(=CC3=O)C4=O)=C(C[C@@H](C)C[C@H](OC)[C@H](O)[C@@H](C)/C=C(\C)[C@@H]1OC(N)=O)C2=O	7.22185	1144.59	18	8	4.497	FALSE
CHEMBL1934626	62	nM	Cc1ncnc(Nc2ccc(OCc3cccc(F)c3)c(Cl)c2)c1C#Cc1ccc(CN2CCCC2)c(F)c1	7.20761	544.184	5	1	7.03482	FALSE
CHEMBL1256426	62	nM	CC(C)N1CCN([C@H]2CC[C@@H](n3nc(-c4ccc(Nc5nc6cccc(Cl)c6o5)cc4)c4c(N)ncnc43)CC2)CC1	7.20761	585.273	10	2	6.1234	FALSE
CHEMBL466615	63	nM	CN(C)C(=O)O[C@@H]1CN[C@H](C#Cc2cc3ncnc(Nc4ccc(OCc5cccc(F)c5)c(Cl)c4)c3s2)C1	7.20066	565.135	8	2	5.5866	FALSE
CHEMBL466614	63	nM	CCNC(=O)O[C@@H]1CN[C@H](C#Cc2cc3ncnc(Nc4ccc(OCc5cccc(F)c5)c(Cl)c4)c3s2)C1	7.20066	565.135	8	3	5.6345	FALSE
CHEMBL466175	63	nM	CN(C)C(=O)O[C@H]1CN[C@@H](C#Cc2cc3ncnc(Nc4ccc(OCc5cccc(F)c5)c(Cl)c4)c3s2)C1	7.20066	565.135	8	2	5.5866	FALSE
CHEMBL450396	63	nM	O=C(O[C@H]1CN[C@@H](C#Cc2cc3ncnc(Nc4ccc(OCc5cccc(F)c5)c(Cl)c4)c3s2)C1)N1CCOCC1	7.20066	607.146	9	2	5.3572	FALSE
CHEMBL2348415	65	nM	CS(=O)(=O)CCNC(=O)C1=Cc2c(ncnc2Nc2ccc(Oc3cccc(C(F)(F)F)c3)c(Cl)c2)NCC1	7.18709	581.111	8	3	5.0445	FALSE
CHEMBL473429	68	nM	N#CCNCc1ccc(-c2cc3ncnc(Nc4ccc(OCc5cccc(F)c5)c(Cl)c4)c3s2)o1	7.16749	519.093	8	2	6.67958	FALSE
CHEMBL473438	68	nM	CCNCc1ccc(-c2cc3ncnc(Nc4ccc(OCc5cccc(F)c5)c(Cl)c4)c3s2)[nH]1	7.16749	507.13	6	3	6.911	FALSE
CHEMBL517123	68	nM	CN(C)C(=O)O[C@H]1CN[C@H](C#Cc2cc3ncnc(Nc4ccc(OCc5cccc(F)c5)c(Cl)c4)c3s2)C1	7.16749	565.135	8	2	5.5866	FALSE
CHEMBL475768	71	nM	CS(=O)(=O)CCNCc1ccc(-c2cc3ncnc(Nc4ccc(OCc5cccc(F)c5)c(Cl)c4)c3s2)o1	7.14874	586.091	9	2	6.2006	FALSE
CHEMBL507714	72	nM	COc1cc(N2CCC(N3CCN(S(C)(=O)=O)CC3)CC2)ccc1Nc1nccc(-c2c(-c3cccc(C(=O)Nc4c(F)cccc4F)c3)nc3ccccn23)n1	7.14267	793.297	11	2	6.287	FALSE
CHEMBL1090360	73	nM	O=C(Cc1ccccc1)Nc1cccc(-c2nc3sccn3c2-c2ccnc(Nc3cccc(N4CCOCC4)c3)n2)c1	7.13668	587.21	9	2	6.2812	FALSE
CHEMBL3958482	73	nM	COc1cc2ncnc(Nc3ccc(Oc4ccccc4)cc3)c2cc1NC(=O)/C=C/CN1CCCCC1	7.13668	509.243	7	2	6.1549	FALSE
CHEMBL1933083	73	nM	Cc1ncnc(Nc2ccc(OCc3cccc(F)c3)c(Cl)c2)c1C#Cc1cccc(CN(C)C)c1	7.13668	500.178	5	1	6.36152	FALSE
CHEMBL230255	75	nM	Cc1cc(Nc2ncnc3ccc(OCCCN4CCOCC4)cc23)ccc1OC1CCN(C(=O)CC(C)(C)C)CC1	7.12494	575.347	8	1	5.58892	FALSE
CHEMBL389457	76	nM	COCC(=O)NCC#Cc1ccc2ncnc(Nc3ccc(OC4CCN(C(=O)Nc5c(F)cccc5F)CC4)c(C)c3)c2c1	7.11919	614.245	7	3	5.14942	FALSE
CHEMBL473437	76	nM	CN(C)Cc1ccc(-c2cc3ncnc(Nc4ccc(OCc5cccc(F)c5)c(Cl)c4)c3s2)[nH]1	7.11919	507.13	6	2	6.8631	FALSE
CHEMBL231103	77	nM	COCCOc1cc2ncnc(Nc3ccc(OC4CCN(C(=O)C5CCCC5)CC4)c(C)c3)c2cc1OCCOC	7.11351	578.31	9	1	5.29222	FALSE
CHEMBL387543	77	nM	COc1cc2ncnc(Nc3ccc(Oc4ccc(C(=O)NCC(C)(C)C)cc4)c(C)c3)c2cc1OC	7.11351	500.242	7	2	6.26722	FALSE
CHEMBL3092314	78	nM	CCN(CC)CCCNC(=O)Nc1cc2c(Nc3ccc(F)c(Cl)c3)ncnc2cc1O[C@H]1CCOC1	7.10791	530.221	7	3	5.187	FALSE
CHEMBL525805	78	nM	CCOC(=O)N[C@H]1CN[C@H](C#Cc2cc3ncnc(Nc4ccc(OCc5cccc(F)c5)c(Cl)c4)c3s2)C1	7.10791	565.135	8	3	5.6345	FALSE
CHEMBL1928955	79	nM	O=C(COc1ccccc1)Nc1cccc(Oc2cc(Nc3ccc(OCc4cccc(F)c4)c(Cl)c3)ncn2)c1	7.10237	570.147	7	2	7.4015	FALSE
CHEMBL4090083	82	nM	NP(=O)(OCCCCOc1ccc2ncnc(Nc3cccc(Br)c3)c2c1)N(CCCl)CCCl	7.08619	589.041	6	2	6.1579	FALSE
CHEMBL4450824	83.84	nM	CC(C)OCCOc1cc2ncnc(Nc3ccc(F)c(Cl)c3)c2cc1NC(=O)/C=C/CN(C)C	7.07655	501.194	7	2	5.026	FALSE
CHEMBL507329	84	nM	O=C(O[C@H]1CN[C@H](C#Cc2cc3ncnc(Nc4ccc(OCc5cccc(F)c5)c(Cl)c4)c3s2)C1)N1CCOCC1	7.07572	607.146	9	2	5.3572	FALSE
CHEMBL3680375	84.05	nM	O=C(/C=C/CN1CCCCC1)Nc1cc2c(Nc3ccc(F)c(Cl)c3)ncnc2cc1OCCCN1CCOCC1	7.07546	582.252	8	2	5.2476	FALSE
CHEMBL451074	85	nM	O=C(O[C@H]1CN[C@H](C#Cc2cc3ncnc(Nc4ccc5c(cnn5S(=O)(=O)c5cccc(F)c5)c4)c3s2)C1)N1CCOCC1	7.07058	647.142	12	2	3.7115	FALSE
CHEMBL1934633	86	nM	Cc1ncnc(Nc2ccc(OCc3cccc(F)c3)c(Cl)c2)c1/C=C/c1ccc(CNC2CC2)cc1	7.0655	514.194	5	2	7.32252	FALSE
CHEMBL475769	86	nM	CS(=O)(=O)CCNCc1cc(-c2cc3ncnc(Nc4ccc(OCc5cccc(F)c5)c(Cl)c4)c3s2)co1	7.0655	586.091	9	2	6.2006	FALSE
CHEMBL1088931	86	nM	O=C(Nc1cccc(-c2nc3sccn3c2-c2ccnc(Nc3cccc(N4CCOCC4)c3)n2)c1)c1c(F)cccc1F	7.0655	609.176	9	2	6.6305	FALSE
CHEMBL1090351	86	nM	O=C(Nc1cccc(-c2nc3sccn3c2-c2ccnc(Nc3ccc(N4CCOCC4)cc3)n2)c1)c1c(F)cccc1F	7.0655	609.176	9	2	6.6305	FALSE
CHEMBL495733	88	nM	CS(=O)(=O)N1CCC[C@@H]1C#Cc1cc2ncnc(Nc3ccc(OCc4cccc(F)c4)c(Cl)c3)c2s1	7.05552	556.081	7	1	5.5819	FALSE
CHEMBL215033	90	nM	COc1cc(Nc2ncnc3ccc(-c4ccc(CNCCS(C)(=O)=O)o4)cc23)ccc1OCc1cccc(F)c1	7.04576	576.184	9	2	5.4943	FALSE
CHEMBL500381	90	nM	CCC(=O)O[C@H]1CN[C@H](C#Cc2cc3ncnc(Nc4ccc(OCc5cccc(F)c5)c(Cl)c4)c3s2)C1	7.04576	550.124	8	2	5.8416	FALSE
CHEMBL4519470	93	nM	COc1cc2ncnc(Nc3ccc(Oc4ccc(C)nc4)c(C)c3)c2cc1NC(=O)CC1CCSS1	7.03152	533.156	9	2	6.66844	FALSE
CHEMBL4791900	95	nM	C=CC(=O)Nc1cccc(-c2c(-c3ccc(N4CCN(C)CC4)cc3)[nH]c3ncnc(Nc4ccc(OCc5cccc(F)c5)c(Cl)c4)c23)c1	7.02228	687.252	7	3	8.2833	FALSE
CHEMBL481324	95	nM	CS(=O)(=O)CCNCc1ccc(-c2cc3c(Nc4ccc(OCc5cccc(F)c5)c(Cl)c4)ncnc3s2)s1	7.02228	602.068	9	2	6.6691	FALSE
CHEMBL4286374	96	nM	O=C(Nc1ccc2ncnc(Nc3cccc(Br)c3)c2c1)c1ccc(C(F)(F)F)cc1O	7.01773	502.025	5	3	6.1126	FALSE
CHEMBL497184	98	nM	CCO[C@H]1CN[C@H](C#Cc2cc3ncnc(Nc4ccc(OCc5cccc(F)c5)c(Cl)c4)c3s2)C1	7.00877	522.129	7	2	5.9249	FALSE
CHEMBL3901210	100	nM	COCCOc1cc2c(Nc3ccc(F)c(Cl)c3)ncnc2cc1OCCCCCCC(=O)NO	7	506.173	8	3	5.0258	FALSE
CHEMBL3898480	100	nM	C[C@@H](Nc1ncnc2[nH]c(-c3ccc(CNCCCCCCCC(=O)NO)cc3)cc12)c1ccccc1	7	500.29	6	5	5.7336	FALSE
CHEMBL3905131	100	nM	C[C@@H](Nc1ncnc2[nH]c(-c3ccc(C(=O)NCCNCCCCCC(=O)NO)cc3)cc12)c1ccccc1	7	529.28	7	6	4.1832	FALSE
CHEMBL3939306	100	nM	C[C@@H](Nc1ncnc2[nH]c(-c3ccc(C(=O)NCCNCCCCCCC(=O)NO)cc3)cc12)c1ccccc1	7	543.296	7	6	4.5733	FALSE
CHEMBL3952709	100	nM	C[C@@H](Nc1ncnc2[nH]c(-c3ccc(NC(=O)CCCCCCC(=O)NO)cc3)cc12)c1ccccc1	7	500.254	6	5	5.5825	FALSE
CHEMBL595615	100	nM	COc1cc2c(Nc3ccc(-c4nc5ccccc5s4)cc3)ncnc2cc1OCCCN1CCN(C)CC1	7	540.231	9	1	5.675	FALSE
CHEMBL4237833	100	nM	CO[C@H]1/C=C\C=C(/C)C(=O)NC2=CC(=O)C(NCC#CCC[C@@H]3C[C@H]4[C@@H]5CCc6cc(O)ccc6[C@H]5CC[C@]4(C)[C@H]3O)=C(C[C@@H](C)C[C@H](OC)[C@H](O)[C@@H](C)/C=C(\C)[C@@H]1OC(N)=O)C2=O	7	881.483	11	6	5.9841	FALSE
CHEMBL4475271	100	nM	CO[C@H]1/C=C\C=C(/C)C(=O)NC2=CC(=O)C(NC/C=C/C[C@@H]3C[C@H]4[C@@H]5CCc6cc(O)ccc6[C@H]5CC[C@]4(C)[C@H]3O)=C(C[C@@H](C)C[C@H](OC)[C@H](O)[C@@H](C)/C=C(\C)[C@@H]1OC(N)=O)C2=O	7	869.483	11	6	6.1468	FALSE
CHEMBL384711	100	nM	CS(=O)(=O)CCNCc1ccc(-c2ccc3ncnc(Nc4ccc(OCc5cccc(Br)c5)cc4)c3c2)o1	7	606.094	8	2	6.1091	FALSE
CHEMBL4246725	100	nM	CO[C@H]1/C=C\C=C(/C)C(=O)NC2=CC(=O)C(NC/C=C/CCC[C@@H]3C[C@H]4[C@@H]5CCc6cc(O)ccc6[C@H]5CC[C@]4(C)[C@H]3O)=C(C[C@@H](C)C[C@H](OC)[C@H](O)[C@@H](C)/C=C(\C)[C@@H]1OC(N)=O)C2=O	7	897.514	11	6	6.927	FALSE
CHEMBL1683969	102	nM	CCN1CCN(C(=O)/C(F)=C/c2c(C)ncnc2Nc2ccc(OCc3cccc(F)c3)c(Cl)c2)CC1	6.9914	527.19	6	1	5.37462	FALSE
CHEMBL4642574	104	nM	N#Cc1cnc2cc(OC[C@H](O)CO)c(NC(=O)CC3CSSC3)cc2c1Nc1ccc(OCc2cccc(F)c2)c(Cl)c1	6.98297	654.117	10	4	6.29338	FALSE
CHEMBL1934629	110	nM	Cc1ncnc(Nc2ccc(OCc3cccc(F)c3)c(Cl)c2)c1C#Cc1ncc(CN2CCCC2)s1	6.95861	533.145	7	1	6.35222	FALSE
CHEMBL523573	110	nM	COCCN1CCC[C@@H]1C#Cc1cc2ncnc(Nc3ccc(OCc4cccc(F)c4)c(Cl)c3)c2s1	6.95861	536.145	7	1	6.2687	FALSE
CHEMBL480348	111	nM	CCNCc1ccc(-c2cc3c(Nc4ccc(OCc5cccc(F)c5)c(Cl)c4)ncnc3s2)[nH]1	6.95468	507.13	6	3	6.911	FALSE
CHEMBL475446	113	nM	CS(=O)(=O)CCNCc1ccc(-c2cc3ncnc(Nc4ccc(OCc5cccc(F)c5)c(Cl)c4)c3s2)[nH]1	6.94692	585.107	8	3	5.9357	FALSE
CHEMBL14627	117	nM	O=C(NCCCCOc1ccc2ncnc(Nc3ccc(OCc4ccccc4)cc3)c2c1)C(F)(F)F	6.93181	510.188	6	2	5.7899	FALSE
CHEMBL1934631	120	nM	Cc1ncnc(Nc2ccc(OCc3cccc(F)c3)c(Cl)c2)c1/C=C/c1ccc(CNCCS(C)(=O)=O)cc1	6.92082	580.171	7	2	6.20472	FALSE
CHEMBL396204	120	nM	COCCOc1ccc2ncnc(Nc3ccc(OC4CCN(C(=O)CC(C)(C)C)CC4)c(C)c3)c2c1	6.92082	506.289	7	1	5.51302	FALSE
CHEMBL3945555	120	nM	O=C(CBr)OCCn1c(=O)oc2cc3ncnc(Nc4ccc(Oc5cccc(C(F)(F)F)c5)c(Cl)c4)c3cc21	6.92082	636.002	9	1	6.6839	FALSE
CHEMBL257477	120	nM	COCCN(C)C(=O)[C@@H](C)Oc1cccc2ncnc(Nc3ccc(Oc4ccc(C)nc4)c(C)c3)c12	6.92082	501.238	8	1	5.04964	FALSE
CHEMBL497803	120	nM	COC(=O)N1CCC[C@@H]1C#Cc1cc2ncnc(Nc3ccc(OCc4cccc(F)c4)c(Cl)c3)c2s1	6.92082	536.109	7	1	6.3887	FALSE
CHEMBL452768	120	nM	O=C(O[C@H]1CN[C@H](C#Cc2cc3ncnc(Nc4ccc5c(ccn5S(=O)(=O)c5ccsc5)c4)c3s2)C1)N1CCOCC1	6.92082	634.113	12	2	4.2389	FALSE
CHEMBL4646030	121	nM	N#Cc1cnc2cc(OC[C@@H](O)CO)c(NC(=O)CC3CSSC3)cc2c1Nc1ccc(OCc2cccc(F)c2)c(Cl)c1	6.91721	654.117	10	4	6.29338	FALSE
CHEMBL3914227	128	nM	CCOc1cc2ncnc(Nc3ccc4c(cnn4Cc4ccccc4)c3)c2cc1NC(=O)/C=C/CN1[C@H](C)CCC[C@@H]1C	6.89279	589.317	8	2	6.9277	FALSE
CHEMBL1934630	130	nM	Cc1ncnc(Nc2ccc(OCc3cccc(F)c3)c(Cl)c2)c1C#CCOc1ccc(CNC(C)C)cc1	6.88606	544.204	6	2	6.82862	FALSE
CHEMBL389741	130	nM	COCC(=O)NCC#Cc1ccc2ncnc(Nc3ccc(Oc4cccc(C(=O)NCC(C)(C)C)c4)c(C)c3)c2c1	6.88606	565.269	7	3	5.36412	FALSE
CHEMBL228977	130	nM	Cc1cc(Nc2ncnc3cnc(N4CCN(C)CC4)cc23)ccc1Oc1ccc(C(=O)NCC(C)(C)C)cc1	6.88606	539.301	8	2	5.39682	FALSE
CHEMBL593306	130	nM	COc1ccc2nc(-c3ccc(Nc4ncnc5cc(OCCCN6CCN(C)CC6)c(OC)cc45)cc3)sc2c1	6.88606	570.241	10	1	5.6836	FALSE
CHEMBL503253	130	nM	CC(c1cccc(F)c1)n1ncc2cc(Nc3ncnc4cc(C#C[C@@H]5C[C@@H](OC(=O)N6CCOCC6)CN5)sc34)ccc21	6.88606	611.211	10	2	5.0838	FALSE
CHEMBL4592101	131.6	nM	CCCOCCOc1cc2ncnc(Nc3ccc(F)c(Cl)c3)c2cc1NC(=O)/C=C/CN(C)C	6.88074	501.194	7	2	5.0276	FALSE
CHEMBL500640	135	nM	CCOC(=O)O[C@H]1CN[C@H](C#Cc2cc3ncnc(Nc4ccc(OCc5cccc(F)c5)c(Cl)c4)c3s2)C1	6.86967	566.119	9	2	6.0615	FALSE
CHEMBL229037	140	nM	COCC(=O)NCC#Cc1ccc2ncnc(Nc3ccc(Oc4ccc(C(=O)NCC(C)(C)C)cc4)c(C)c3)c2c1	6.85387	565.269	7	3	5.36412	FALSE
CHEMBL1934627	140	nM	Cc1ncnc(Nc2ccc(OCc3cccc(F)c3)c(Cl)c2)c1C#Cc1ccc(CN2CCCC2)o1	6.85387	516.173	6	1	6.48872	FALSE
CHEMBL228627	140	nM	COCC(=O)NCC#Cc1ccc2ncnc(Nc3ccc(Oc4cccc(C(=O)Nc5ccccc5)c4)c(C)c3)c2c1	6.85387	571.222	7	3	5.84052	FALSE
CHEMBL377250	141	nM	[O-][S+]1CCN(Cc2ccc(-c3ccc4ncnc(Nc5ccc(OCc6cccc(F)c6)c(C(F)(F)F)c5)c4c3)o2)CC1	6.85078	610.166	7	1	6.9346	FALSE
CHEMBL445572	141	nM	CS(=O)(=O)CCN(Cc1ccccc1)Cc1ccc(-c2ccc3ncnc(Nc4ccc(OCc5cccc(F)c5)c(Cl)c4)c3c2)o1	6.85078	670.182	8	1	8.0517	FALSE
CHEMBL475594	146	nM	CN(C)Cc1ccc(-c2cc3ncnc(Nc4ccc(OCc5cccc(F)c5)c(Cl)c4)c3s2)o1	6.83565	508.114	7	1	7.128	FALSE
CHEMBL1090363	150	nM	CN(C)CCc1cccc(Nc2nccc(-c3c(-c4cccc(NC(=O)Cc5ccccc5)c4)nc4sccn34)n2)c1	6.82391	573.231	8	2	6.5487	FALSE
CHEMBL3344217	152	nM	CCC(=O)ON[C@H](CS(C)(=O)=O)c1ccc(-c2ccc3ncnc(Nc4ccc(OCc5cccc(F)c5)c(Cl)c4)c3c2)o1	6.81816	638.14	10	2	6.5484	FALSE
CHEMBL481331	153	nM	CS(=O)(=O)CCNCc1ccc(-c2cc3c(Nc4ccc(OCc5cccc(F)c5)c(Cl)c4)ncnc3s2)[nH]1	6.81531	585.107	8	3	5.9357	FALSE
CHEMBL3344219	158.2	nM	CCCCCCC(=O)ON[C@H](CS(C)(=O)=O)c1ccc(-c2ccc3ncnc(Nc4ccc(OCc5cccc(F)c5)c(Cl)c4)c3c2)o1	6.80079	694.203	10	2	8.1088	FALSE
CHEMBL4060320	160	nM	NP(=O)(OCCCCCOc1ccc2ncnc(Nc3cccc(Br)c3)c2c1)N(CCCl)CCCl	6.79588	603.057	6	2	6.548	FALSE
CHEMBL4457447	160	nM	CCOc1cc2ncc(C#N)c(Nc3ccc(OCc4cccc(F)c4)c(Cl)c3)c2cc1NC(=O)CC1CCSS1	6.79588	608.112	8	2	8.10258	FALSE
CHEMBL1090361	160	nM	CN1CCc2cc(Nc3nccc(-c4c(-c5cccc(NC(=O)Cc6ccccc6)c5)nc5sccn45)n3)ccc2C1	6.79588	571.215	8	2	6.4325	FALSE
CHEMBL3344218	163.8	nM	CCCCC(=O)ON[C@H](CS(C)(=O)=O)c1ccc(-c2ccc3ncnc(Nc4ccc(OCc5cccc(F)c5)c(Cl)c4)c3c2)o1	6.78569	666.172	10	2	7.3286	FALSE
CHEMBL4798527	165	nM	Cc1ccc(NC(=O)c2ccc(C)c(C(F)(F)F)c2)cc1C#Cc1nn([C@H]2CC[C@H](O)CC2)c2ncnc(N)c12	6.78252	548.215	7	3	5.17224	FALSE
CHEMBL4517633	167	nM	N#Cc1cnc2cc(OC[C@@H](O)CO)c(NC(=O)C3CSSC3)cc2c1Nc1ccc(OCc2cccc(F)c2)c(Cl)c1	6.77728	640.102	10	4	5.90328	FALSE
CHEMBL372523	170	nM	CCc1c(NC(=O)OCc2ccccc2)cn2ncnc(Nc3ccc4c(cnn4Cc4ccccc4)c3)c12	6.76955	517.223	8	2	6.182	FALSE
CHEMBL1090355	170	nM	O=C(Nc1cccc(-c2nc3sccn3c2-c2ccnc(Nc3ccc(N4CCOCC4)cc3)n2)c1)Oc1ccccc1	6.76955	589.19	10	2	6.7109	FALSE
CHEMBL1090362	170	nM	CCN1CCN(c2ccc(Nc3nccc(-c4c(-c5cccc(NC(=O)Cc6ccccc6)c5)nc5sccn45)n3)cc2)CC1	6.76955	614.258	9	2	6.5865	FALSE
CHEMBL1090354	170	nM	O=C(Nc1ccccc1)Nc1cccc(-c2nc3sccn3c2-c2ccnc(Nc3ccc(N4CCOCC4)cc3)n2)c1	6.76955	588.206	9	3	6.744	FALSE
CHEMBL4084847	180	nM	NP(=O)(OCCOc1ccc2ncnc(Nc3cccc(Br)c3)c2c1)N(CCCl)CCCl	6.74473	561.01	6	2	5.3777	FALSE
CHEMBL2311747	180	nM	Brc1ccc(C2=NN(c3nc(-c4ccc(Br)cc4)cs3)C(c3ccc4c(c3)OCO4)C2)cc1	6.74473	580.941	6	0	7.4195	FALSE
CHEMBL505463	180	nM	O=C(O[C@H]1CN[C@H](C#Cc2cc3ncnc(Nc4ccc(Oc5ccnc6ccc(F)cc56)c(Cl)c4)c3s2)C1)N1CCOCC1	6.74473	644.141	10	2	6.1187	FALSE
CHEMBL1934628	180	nM	Cc1ncnc(Nc2ccc(OCc3cccc(F)c3)c(Cl)c2)c1C#Cc1ccc(CN2CCCC2)s1	6.74473	532.15	6	1	6.95722	FALSE
CHEMBL451347	180	nM	O=C(O[C@H]1CN[C@H](C#Cc2cc3ncnc(Nc4ccc5c(ccn5Cc5cscn5)c4)c3s2)C1)N1CCOCC1	6.74473	585.162	11	2	4.4452	FALSE
CHEMBL604893	180	nM	COc1cc2ncnc(Nc3ccc(-c4nc5ccccc5s4)c(Cl)c3)c2cc1OCCCN1CCN(C)CC1	6.74473	574.192	9	1	6.3284	FALSE
CHEMBL3936642	180	nM	O=C(CBr)OCCn1c(=O)oc2cc3ncnc(Nc4ccc(OCc5cccc(F)c5)c(Cl)c4)c3cc21	6.74473	600.021	9	1	5.5909	FALSE
CHEMBL4763660	188	nM	C=CC(=O)Nc1cc(-c2c[nH]c3ncnc(Nc4ccc5[nH]c(Cc6ccccc6)nc5c4)c23)ccc1OCCO	6.72584	545.218	7	5	5.3312	FALSE
CHEMBL4105530	190	nM	NP(=O)(OCCCCOc1ccc2ncnc(Nc3ccc(OCc4cccc(F)c4)c(Cl)c3)c2c1)N(CCCl)CCCl	6.72125	669.124	7	2	7.7669	FALSE
CHEMBL1683964	190	nM	Cc1ncnc(Nc2ccc(OCc3cccc(F)c3)c(Cl)c2)c1/C=C/c1ccc(CN2CCOCC2)cc1	6.72125	544.204	6	1	6.90272	FALSE
CHEMBL3964033	192.8	nM	O=C(CCCCCn1cc(-c2ccc3ncnc(Nc4ccc(OCc5cccc(F)c5)c(Cl)c4)c3c2)nn1)NO	6.71489	575.185	9	3	6.0692	FALSE
CHEMBL1928948	196	nM	CCOC(=O)/C=C/C(=O)Nc1cccc(Oc2cc(Nc3ccc(OCc4cccc(F)c4)c(Cl)c3)ncn2)c1	6.70774	562.142	8	2	6.4418	FALSE
CHEMBL3971413	198	nM	CCOc1cc2ncnc(Nc3ccc4c(cnn4Cc4ccccc4)c3)c2cc1NC(=O)/C=C/CN1[C@H](C)CNC[C@@H]1C	6.70333	590.312	9	3	5.347	FALSE
CHEMBL1257888	200	nM	CN1CCN([C@H]2CC[C@@H](n3nc(-c4ccc(Nc5nc6cccc(Cl)c6o5)cc4)c4c(N)ncnc43)CC2)CC1	6.69897	557.242	10	2	5.3448	FALSE
CHEMBL387207	200	nM	CS(=O)(=O)CCNCc1ccc(-c2ccc3ncnc(Nc4ccc(OCc5ccccc5)c(C(F)(F)F)c4)c3c2)o1	6.69897	596.171	8	2	6.3654	FALSE
CHEMBL396287	210	nM	COCC(=O)NCC#Cc1ccc2ncnc(Nc3ccc(OC4CCN(C(=O)c5cccc(Cl)c5)CC4)c(C)c3)c2c1	6.67778	597.214	7	2	5.13292	FALSE
CHEMBL452980	210	nM	O=C(O[C@H]1CN[C@H](C#Cc2cc3ncnc(Nc4ccc5c(c4)c(F)cn5Cc4ccccc4)c3s2)C1)N1CCOCC1	6.67778	596.201	9	2	5.1278	FALSE
CHEMBL1928949	219	nM	CCOC(=O)CNc1cccc(Oc2cc(Nc3ccc(OCc4cccc(F)c4)c(Cl)c3)ncn2)c1	6.65956	522.147	8	2	6.359	FALSE
CHEMBL1934622	220	nM	Cc1ncnc(Nc2ccc(OCc3cccc(F)c3)c(Cl)c2)c1C#Cc1ccc(CNCCS(C)(=O)=O)cc1	6.65758	578.155	7	2	5.43412	FALSE
CHEMBL215814	220	nM	CS(=O)(=O)CCNCc1ccc(-c2ccc3ncnc(Nc4ccc(OCc5cccc(F)c5)c(C(F)(F)F)c4)c3c2)o1	6.65758	614.161	8	2	6.5045	FALSE
CHEMBL231099	230	nM	COCCOc1cc2ncnc(Nc3ccc(OC4CCN(C(=O)Nc5c(F)cccc5F)CC4)c(C)c3)c2cc1OCCOC	6.63827	637.271	9	2	6.08572	FALSE
CHEMBL3930270	230	nM	O=C(CCl)OCCn1c(=O)oc2cc3ncnc(Nc4ccc(Oc5cccc(C(F)(F)F)c5)c(Cl)c4)c3cc21	6.63827	592.053	9	1	6.5278	FALSE
CHEMBL4070053	240	nM	NP(=O)(OCCCC(=O)Oc1ccc2ncnc(Nc3cccc(Br)c3)c2c1)N(CCCl)CCCl	6.61979	603.02	7	2	5.6845	FALSE
CHEMBL3680374	244.39	nM	O=C(/C=C/CN1CCCCC1)Nc1cc2c(Nc3ccc(F)c(Cl)c3)ncnc2cc1OCC(F)F	6.61192	519.165	6	2	5.7904	FALSE
CHEMBL475767	246	nM	CN(C)Cc1ccc(-c2cc3c(Nc4ccc(OCc5cccc(F)c5)c(Cl)c4)ncnc3s2)[nH]1	6.60906	507.13	6	2	6.8631	FALSE
CHEMBL475761	250	nM	CN1CCN(Cc2ccc(-c3cc4ncnc(Nc5ccc(OCc6cccc(F)c6)c(Cl)c5)c4s3)o2)CC1	6.60206	563.156	8	1	6.8138	FALSE
CHEMBL5196657	250	nM	FC(F)(F)c1ccc(/C=C/c2nc(Cn3ccc4cc(-c5cccc(Br)c5)ccc43)co2)cc1	6.60206	522.055	3	0	8.2963	FALSE
CHEMBL227103	260	nM	COCCOc1cc2ncnc(Nc3ccc(OC4CCN(C(=O)CC(C)(C)C)CC4)c(C)c3)c2cc1OCCOC	6.58503	580.326	9	1	5.53822	FALSE
CHEMBL452716	260	nM	O=C(O[C@H]1CN[C@H](C#Cc2cc3ncnc(Nc4ccc5c(Oc6ccccn6)cccc5c4)c3s2)C1)N1CCOCC1	6.58503	592.189	10	2	5.3262	FALSE
CHEMBL4447976	261.8	nM	CCOCCOc1cc2ncnc(Nc3ccc(OCc4cccc(F)c4)c(Cl)c3)c2cc1NC(=O)/C=C/CN(C)C	6.58203	593.221	8	2	6.2165	FALSE
CHEMBL3977926	278	nM	CCOc1cc2ncnc(Nc3ccc(OCc4ccccn4)cc3)c2cc1NC(=O)/C=C/CN1CCCC1	6.55596	524.254	8	2	5.3366	FALSE
CHEMBL103005	280	nM	Cc1cc(Nc2ncnc3cnc(NCCN4CCOCC4)cc23)ccc1Oc1ccc(C(=O)NCC(C)(C)C)cc1	6.55284	569.311	9	3	5.38912	FALSE
CHEMBL475599	299	nM	CS(=O)(=O)CCNCc1cc(-c2cc3c(Nc4ccc(OCc5cccc(F)c5)c(Cl)c4)ncnc3s2)cs1	6.52433	602.068	9	2	6.6691	FALSE
CHEMBL593987	300	nM	COc1cc2c(Nc3ccc(-c4nc5ccccc5s4)c(F)c3)ncnc2cc1OCCCN1CCN(C)CC1	6.52288	558.221	9	1	5.8141	FALSE
CHEMBL4176629	300	nM	NS(=O)(=O)c1ccc(-n2c(SCC(=O)Nc3ccc([N+](=O)[O-])cc3[N+](=O)[O-])nc3cc4ccccc4cc3c2=O)cc1	6.52288	606.063	11	2	3.7335	FALSE
CHEMBL113900	320	nM	CC(C)N(CC#CC(=O)Nc1ccc2ncc(C#N)c(Nc3cccc(Br)c3)c2c1)C(C)C	6.49485	503.132	5	2	5.67328	FALSE
CHEMBL1258118	334	nM	Nc1ncnc2c1c(-c1ccc(Nc3nc4cccc(Cl)c4o3)cc1)nn2[C@H]1CC[C@H](N2CCOCC2)CC1	6.47625	544.21	10	2	5.4296	FALSE
CHEMBL214419	360	nM	CS(=O)(=O)CCNCc1ccc(-c2ccc3ncnc(Nc4ccc(OCc5cccc(C(F)(F)F)c5)cc4)c3c2)o1	6.4437	596.171	8	2	6.3654	FALSE
CHEMBL461811	370	nM	Cc1cc(Oc2ccc(Nc3ncnc4cc(C#C[C@@H]5C[C@@H](OC(=O)N6CCOCC6)CN5)sc34)cc2Cl)no1	6.4318	580.13	11	2	4.72782	FALSE
CHEMBL115187	370	nM	CCCN(CC#CC(=O)Nc1ccc2ncc(C#N)c(Nc3cccc(Br)c3)c2c1)CCC	6.4318	503.132	5	2	5.67648	FALSE
CHEMBL1090356	370	nM	O=C(Cc1ccccc1)Nc1cccc(-c2nc3sccn3c2-c2ccnc(Nc3ccc(N4CCOCC4)cc3)n2)c1	6.4318	587.21	9	2	6.2812	FALSE
CHEMBL1256428	397	nM	COCCCN1CCN([C@H]2CC[C@@H](n3nc(-c4ccc(Nc5nc6cccc(Cl)c6o5)cc4)c4c(N)ncnc43)CC2)CC1	6.40121	615.284	11	2	5.7515	FALSE
CHEMBL1683962	440	nM	Cc1ncnc(Nc2ccc(OCc3cccc(F)c3)c(Cl)c2)c1C#Cc1ccc(CN2CCOCC2)cc1	6.35655	542.188	6	1	6.13212	FALSE
CHEMBL2316785	460	nM	Brc1ccc(C2=NN(c3nc(-c4ccc(Br)cc4)cs3)C(c3ccc4c(c3)OCCO4)C2)cc1	6.33724	594.956	6	0	7.462	FALSE
CHEMBL1256436	478	nM	Cc1cc(Nc2nc3cccc(Cl)c3o2)ccc1-c1nn([C@H]2CC[C@H](N3CCN(C)CC3)CC2)c2ncnc(N)c12	6.32057	571.257	10	2	5.65322	FALSE
CHEMBL595406	490	nM	COc1cc2c(Nc3ccc(-c4nc5ccccc5s4)cc3C)ncnc2cc1OCCCN1CCN(C)CC1	6.3098	554.246	9	1	5.98342	FALSE
CHEMBL3939771	537.4	nM	O=C(CCCCCn1cc(-c2ccc3ncnc(Nc4ccc(OCc5nccs5)c(Cl)c4)c3c2)nn1)NO	6.2697	564.146	11	3	5.3866	FALSE
CHEMBL269620	550	nM	CS(=O)(=O)CCNc1nc(-c2ccc3ncnc(Nc4ccc(OCc5cccc(C(F)(F)F)c5)cc4)c3c2)cs1	6.25964	599.127	9	2	6.5512	FALSE
CHEMBL4593016	590	nM	COc1cc2ncnc(Nc3ccc(Oc4ccc(C)nc4)c(C)c3)c2cc1NC(=O)C1CSSC1	6.22915	519.14	9	2	6.13584	FALSE
CHEMBL3633930	625	nM	CCNC(=O)Nc1ccc2ncnc(Nc3ccc(Oc4cccc(C(F)(F)F)c4)c(Cl)c3)c2c1	6.20412	501.118	5	3	6.9793	FALSE
CHEMBL251732	664	nM	Nc1ncnc2c1c(-c1ccc3nc(Cc4ccccc4Cl)[nH]c3c1)nn2[C@H]1CC[C@H](N2CCOCC2)CC1	6.17783	542.231	8	2	5.0119	FALSE
CHEMBL3902778	706.7	nM	O=C(CCCCCCn1cc(-c2ccc3ncnc(Nc4ccc(OCc5nccs5)c(Cl)c4)c3c2)nn1)NO	6.15076	578.162	11	3	5.7767	FALSE
CHEMBL4456266	730	nM	CCOc1cc2ncc(C#N)c(Nc3ccc(OCc4cccc(F)c4)c(Cl)c3)c2cc1NC(=O)C1CSSC1	6.13668	594.096	8	2	7.56998	FALSE
CHEMBL4446124	730	nM	N#Cc1cnc2ccc(NC(=O)CC3CCSS3)cc2c1Nc1ccc(OCc2cccc(F)c2)c(Cl)c1	6.13668	564.086	7	2	7.70388	FALSE
CHEMBL4164936	760	nM	NS(=O)(=O)c1ccc(-n2c(SCC(=O)Nc3cc(Cl)c(Cl)cc3Cl)nc3cc4ccccc4cc3c2=O)cc1	6.11919	617.976	7	2	5.8773	FALSE
CHEMBL606466	780	nM	COc1cc2c(Nc3ccc(-c4nc5ccccc5s4)c(O)c3)ncnc2cc1OCCCN1CCN(C)CC1	6.10791	556.226	10	2	5.3806	FALSE
CHEMBL501050	800	nM	O=C(O[C@H]1CN[C@H](C#Cc2cc3ncnc(Nc4ccc(Sc5cccc(F)c5)c(Cl)c4)c3s2)C1)N1CCOCC1	6.09691	609.107	9	2	5.9294	FALSE
CHEMBL3325479	800	nM	CCOC(=O)C1=C(N)N(c2cccnc2)C2=C(C(=O)CCC2)C1c1cc2cc(OC)ccc2n2nnnc12	6.09691	511.197	11	1	3.0254	FALSE
CHEMBL1683975	810	nM	Cc1ncnc(Nc2ccc(OCc3cccc(F)c3)c(Cl)c2)c1C#CCCNCc1ccccc1	6.09151	500.178	5	2	6.43152	FALSE
CHEMBL1928956	834	nM	O=C(Cc1cc(F)c(F)cc1F)Nc1cccc(Oc2cc(Nc3ccc(OCc4cccc(F)c4)c(Cl)c3)ncn2)c1	6.07883	608.124	6	2	7.9825	FALSE
CHEMBL2316794	850	nM	COc1ccc(-c2csc(N3N=C(c4ccc(Br)cc4)CC3c3ccc4c(c3)OCO4)n2)cc1	6.07058	533.041	7	0	6.6656	FALSE
CHEMBL4291471	879	nM	CC(=O)Nc1ccc(-c2cc3c(Nc4ccc(Oc5cccc(C(F)(F)F)c5)c(Cl)c4)ncnc3s2)cc1	6.05601	554.079	6	2	8.5248	FALSE
CHEMBL4069003	890	nM	NP(=O)(OCCCOc1ccc2ncnc(Nc3cccc(Br)c3)c2c1)N(CCCl)CCCl	6.05061	575.026	6	2	5.7678	FALSE
CHEMBL519757	898	nM	Fc1cccc(COc2ccc(Nc3ncnc4sc(-c5ccc(CNCc6ccccc6)o5)cc34)cc2Cl)c1	6.04672	570.129	7	2	8.3562	FALSE
CHEMBL1087368	960	nM	CCN(CC)CCNC(=O)c1[nH]c2cnnc(Nc3ccc(OCc4cccc(F)c4)c(Cl)c3)c2c1C	6.01773	524.21	6	3	5.45302	FALSE
CHEMBL2031311	970	nM	CCOc1cc2ncc(C#N)c(Nc3ccc(OCc4ccccn4)c(Cl)c3)c2cc1NC(=O)CCN(C)C	6.01323	544.199	8	2	5.76638	FALSE
CHEMBL273789	977	nM	CS(=O)(=O)CCN(CCCCOc1ccc2ncnc(Nc3ccc(OCc4ccccc4)cc3)c2c1)C(=O)C(F)(F)F	6.01011	616.197	8	1	5.5469	FALSE
CHEMBL2031312	980	nM	CCOc1cc2ncc(C#N)c(Nc3ccc(OCc4ccccn4)c(Cl)c3)c2cc1NC(=O)CCN1CCCCC1	6.00877	584.23	8	2	6.69068	FALSE
CHEMBL3947643	1000	nM	COc1cc2c(Nc3ccc(Br)c(Cl)c3)ncnc2cc1O[C@H]1CO[C@H]2[C@@H]1OC[C@@H]2SC	6	537.012	8	1	5.0745	FALSE
CHEMBL3965625	1000	nM	COc1cc2c(Nc3ccc(Br)c(Cl)c3)ncnc2cc1OC1=CO[C@H]2[C@H]1OC[C@@]21COC(C)(C)O1	6	575.046	9	1	5.3374	FALSE
CHEMBL3909572	1000	nM	CCN(CC)[C@H]1CO[C@H]2[C@@H]1OC[C@@H]2Oc1cc2ncnc(Nc3ccc(Br)c(Cl)c3)c2cc1OC	6	562.098	8	1	5.0533	FALSE
CHEMBL3923250	1000	nM	COc1cc2c(Nc3ccc(Cl)c(Cl)c3)ncnc2cc1OCc1csc(N2CCOCC2)n1	6	517.074	9	1	5.5609	FALSE
CHEMBL3934134	1000	nM	COc1cc2c(Nc3ccc(Br)c(Cl)c3Cl)ncnc2cc1OC[C@@H]1CO[C@H]2[C@@H]1OC[C@@H]2OC	6	569.012	8	1	5.2589	FALSE
CHEMBL3633934	1000	nM	CCOC(=O)C(=CNc1ccc2ncnc(Nc3ccc(Oc4cccc(C(F)(F)F)c4)c(Cl)c3)c2c1)C(=O)OCC	6	600.139	9	2	7.2599	FALSE
CHEMBL3958481	1000	nM	COc1cc2c(Nc3ccc(Cl)c(Cl)c3Cl)ncnc2cc1O[C@@H]1C[C@H]2OC[C@H](OC)[C@H]2O1	6	511.047	8	1	5.2498	FALSE
CHEMBL3968192	1000	nM	COc1cc2c(Nc3ccc(Br)c(Cl)c3Cl)ncnc2cc1OC[C@H]1CN2CCCC[C@H]2CO1	6	566.049	7	1	6.0834	FALSE
CHEMBL3927849	1000	nM	COc1cc2c(Nc3ccc(Br)c(Cl)c3)ncnc2cc1O[C@H]1CO[C@H]2[C@@H]1OC[C@@H]2N1CCCCC1	6	574.098	8	1	5.1974	FALSE
CHEMBL3916953	1000	nM	COc1cc2c(Nc3ccc(Cl)c(Cl)c3)ncnc2cc1OCCC1CN(C(=O)OC(C)(C)C)C(C)(C)CO1	6	576.191	8	1	6.8722	FALSE
CHEMBL175558	1000	nM	COc1cc2ncc(C#N)c(Nc3ccc(Sc4ncc(-c5ccccc5)s4)c(Cl)c3)c2cc1NC(=O)/C=C/CN(C)C	6	626.133	9	2	7.84308	FALSE
CHEMBL4294264	1036	nM	COc1cc2ncnc(Nc3ccc(-c4cc(-c5ccc(Br)cc5)c(C#N)c(=N)[nH]4)cc3)c2cc1OC	5.98464	552.091	7	3	6.16635	FALSE
CHEMBL4114766	1081	nM	CC(C)(C)/C=C(\C#N)C(=O)N1CCC[C@@H](n2nc(-c3ccc(Oc4ccccc4)cc3F)c3c(N)ncnc32)C1	5.96617	539.245	8	1	5.66648	FALSE
CHEMBL4104950	1100	nM	COc1cc2ncnc(Nc3ccc(OCc4cccc(F)c4)c(Cl)c3)c2cc1OCCCOP(N)(=O)N(CCCl)CCCl	5.95861	685.119	8	2	7.3854	FALSE
CHEMBL4288374	1200	nM	O=C(NCCN1CCOCC1)Nc1ccc(-c2cc3c(Nc4ccc(Oc5cccc(C(F)(F)F)c5)c(Cl)c4)ncnc3s2)cc1	5.92082	668.158	8	3	8.0201	FALSE
CHEMBL2204532	1200	nM	CN(c1ccc(F)c(NC(=O)c2cccc(OC(C)(C)C#N)c2Cl)c1)c1ccc2nc(NC(=O)C3CC3)sc2n1	5.92082	578.13	8	2	6.53348	FALSE
CHEMBL4077956	1200	nM	NP(=O)(Oc1ccc2ncnc(Nc3cccc(Br)c3)c2c1)N(CCCl)CCCl	5.92082	516.984	5	2	5.3611	FALSE
CHEMBL1928958	1234	nM	COc1ccc(/C=C/C(=O)Nc2cccc(Oc3cc(Nc4ccc(OCc5cccc(F)c5)c(Cl)c4)ncn3)c2)cc1OC	5.90868	626.173	8	2	8.0531	FALSE
CHEMBL1928957	1293	nM	O=C(/C=C/c1ccc(F)cc1)Nc1cccc(Oc2cc(Nc3ccc(OCc4cccc(F)c4)c(Cl)c3)ncn2)c1	5.8884	584.143	6	2	8.175	FALSE
CHEMBL1090353	1300	nM	O=C(CC1CCCC1)Nc1cccc(-c2nc3sccn3c2-c2ccnc(Nc3ccc(N4CCOCC4)cc3)n2)c1	5.88606	579.242	9	2	6.6188	FALSE
CHEMBL4080720	1300	nM	COc1cc2ncnc(Nc3ccc(F)c(Cl)c3)c2cc1OCCCOP(N)(=O)N(CCCl)CCCl	5.88606	579.077	7	2	5.8064	FALSE
CHEMBL2316784	1320	nM	COc1ccc(-c2csc(N3N=C(c4ccc(Br)cc4)CC3c3ccc4c(c3)OCCO4)n2)cc1	5.87943	547.057	7	0	6.7081	FALSE
CHEMBL1163749	1320	nM	CCOC(=O)c1cc2cc(Nc3ncnc4cc(OCCCN5CCC(C)CC5)c(OC)cc34)ccc2s1	5.87943	534.23	9	1	6.2742	FALSE
CHEMBL1256421	1350	nM	CN1CCN([C@H]2CC[C@@H](n3nc(-c4ccc(Nc5nc6cccc(Cl)c6o5)c(F)c4)c4c(N)ncnc43)CC2)CC1	5.86967	575.232	10	2	5.4839	FALSE
CHEMBL1090352	1400	nM	O=C(CC1CCCCC1)Nc1cccc(-c2nc3sccn3c2-c2ccnc(Nc3ccc(N4CCOCC4)cc3)n2)c1	5.85387	593.257	9	2	7.0089	FALSE
CHEMBL4278886	1500	nM	Nc1ccc(-c2cc3c(Nc4ccc(Oc5cccc(C(F)(F)F)c5)c(Cl)c4)ncnc3s2)cc1	5.82391	512.069	6	2	8.1486	FALSE
CHEMBL94109	1592	nM	O=C(/C=C/CN1CCC(N2CCCCC2)CC1)Nc1ccc2ncnc(Nc3cccc(Br)c3)c2c1	5.79806	548.19	6	2	5.5809	FALSE
CHEMBL4097216	1700	nM	NP(=O)(OCCCOc1ccc2ncnc(Nc3ccc(OCc4cccc(F)c4)c(Cl)c3)c2c1)N(CCCl)CCCl	5.76955	655.109	7	2	7.3768	FALSE
CHEMBL2333163	2100	nM	O=C(NCCc1ccc(O)c(Br)c1)/C(Cc1cc(Br)c(O)c(Oc2ccc(CCNC(=O)/C(Cc3cc(Br)c(O)c(-c4cc(C/C(=N\O)C(=O)NCCc5ccc(O)c(Br)c5)cc(Br)c4O)c3)=N/O)cc2Br)c1)=N/O	5.67778	1405.81	15	11	10.4437	FALSE
CHEMBL505637	2100	nM	O=C(NCCc1ccc(O)c(Br)c1)/C(Cc1cc(Br)c(O)c(-c2cc(C/C(=N/O)C(=O)NCCc3ccc(O)c(Br)c3)cc(Br)c2O)c1)=N\O	5.67778	937.88	10	8	6.6892	FALSE
CHEMBL4091626	2100	nM	C#Cc1cccc(Nc2ncnc3ccc(OCCCCOP(N)(=O)N(CCCl)CCCl)cc23)c1	5.67778	535.131	6	2	5.3767	FALSE
CHEMBL1928959	2138	nM	O=C(COc1cc(F)c(F)c(F)c1)Nc1cccc(Oc2cc(Nc3ccc(OCc4cccc(F)c4)c(Cl)c3)ncn2)c1	5.66999	624.119	7	2	7.8188	FALSE
CHEMBL593292	2200	nM	COc1cc2ncnc(Nc3ccc(-c4nc5ccccc5s4)cc3)c2cc1OCCCN1CCN(C)CC1	5.65758	540.231	9	1	5.675	FALSE
CHEMBL2221249	2227	nM	CC(C)CCCCC(=O)N[C@@H](CCN)C(=O)N[C@@H](CN[C@@H](CCN)C(=O)N[C@H]1CCNC(=O)[C@H]([C@@H](C)O)NC(=O)[C@H](CCN)NC(=O)[C@H](CCN)NC(=O)[C@H](CC(C)C)NC(=O)[C@@H](CC(C)C)NC(=O)[C@H](CCN)NC1=O)[C@@H](C)O.CCC(C)CCCCC(=O)N[C@@H](CCN)C(=O)N[C@@H](CN[C@@H](CCN)C(=O)N[C@H]1CCNC(=O)[C@H]([C@@H](C)O)NC(=O)[C@H](CCN)NC(=O)[C@H](CCN)NC(=O)[C@H](CC(C)C)NC(=O)[C@@H](CC(C)C)NC(=O)[C@H](CCN)NC1=O)[C@@H](C)O	5.65228	2295.56	36	36	-10.3261	FALSE
CHEMBL2316777	2230	nM	Cc1ccc(C2=NN(c3nc(-c4ccc(Br)cc4)cs3)C(c3ccc4c(c3)OCO4)C2)cc1	5.6517	517.046	6	0	6.96542	FALSE
CHEMBL592004	2240	nM	Oc1ccc(CN(Cc2cc(Br)cc(Br)c2O)C(=S)Nc2ccccc2)cc1	5.64975	519.946	3	3	6.022	FALSE
CHEMBL4516736	2280	nM	N#Cc1ccc(-c2csc(N3N=C(c4ccc(N5CCOCC5)cc4)CC3c3ccc(Cl)cc3)n2)cc1	5.64207	525.139	7	0	6.52748	FALSE
CHEMBL1165468	2290	nM	CCOC(=O)c1cc2cc(Nc3ncnc4cc(OCCCN(CC)CC)c(OC)cc34)ccc2s1	5.64016	508.214	9	1	5.8841	FALSE
CHEMBL593275	2300	nM	COc1cc2c(Nc3ccc(-c4nc5ccc(Cl)cc5s4)cc3)ncnc2cc1OCCCN1CCN(C)CC1	5.63827	574.192	9	1	6.3284	FALSE
CHEMBL593294	2300	nM	COc1cc2ncnc(Nc3ccc(-c4nc5ccccc5s4)cc3O)c2cc1OCCCN1CCN(C)CC1	5.63827	556.226	10	2	5.3806	FALSE
CHEMBL2316793	2380	nM	Clc1ccc(C2=NN(c3nc(-c4ccc(Br)cc4)cs3)C(c3ccc4c(c3)OCO4)C2)cc1	5.62342	536.991	6	0	7.3104	FALSE
CHEMBL594228	2400	nM	COc1cc2c(Nc3ccc(-c4nc5ccccc5s4)cc3F)ncnc2cc1OCCCN1CCN(C)CC1	5.61979	558.221	9	1	5.8141	FALSE
CHEMBL4087646	2400	nM	NP(=O)(OCCCCOc1ccc2ncnc(Nc3ccc(F)c(Cl)c3)c2c1)N(CCCl)CCCl	5.61979	563.082	6	2	6.1879	FALSE
CHEMBL12131	2468	nM	Cc1cc(C(C#N)c2ccc(Cl)cc2)c(Cl)cc1NC(=O)c1cc(I)cc(I)c1O	5.60765	661.852	3	2	7.1244	FALSE
CHEMBL53463	2485	nM	COc1cccc2c1C(=O)c1c(O)c3c(c(O)c1C2=O)C[C@@](O)(C(=O)CO)C[C@@H]3O[C@H]1C[C@H](N)[C@H](O)[C@H](C)O1	5.60467	543.174	12	6	0.0013	FALSE
CHEMBL195029	2500	nM	COc1cc(Nc2c(C#N)cnc3cc4cc(OCCN5CCOCC5)c(OC)cc4cc23)c(Cl)cc1Cl	5.60206	552.133	8	1	6.03828	FALSE
CHEMBL4097245	2500	nM	NP(=O)(OCCCC(=O)Oc1ccc2ncnc(Nc3ccc(F)c(Cl)c3)c2c1)N(CCCl)CCCl	5.60206	577.062	7	2	5.7145	FALSE
CHEMBL447720	2660	nM	O=C(O[C@H]1CN[C@H](C#Cc2cc3ncnc(Nc4ccc5c(ccn5CCc5ccccc5)c4)c3s2)C1)N1CCOCC1	5.57512	592.226	9	2	5.1831	FALSE
CHEMBL4097795	2700	nM	NP(=O)(OCCCOc1ccc2ncnc(Nc3ccc(F)c(Cl)c3)c2c1)N(CCCl)CCCl	5.56864	549.067	6	2	5.7978	FALSE
CHEMBL360190	2800	nM	O=C1N/C=C/c2ccc(c(Br)c2)Oc2cc(cc(Br)c2O)CCNC(=O)/C(=N/O)Cc2ccc(c(Br)c2)Oc2cc(cc(Br)c2O)C/C1=N\O	5.55284	933.848	10	6	7.9372	FALSE
CHEMBL4061382	3200	nM	NP(=O)(OCCCC(=O)Oc1ccc2ncnc(Nc3ccc(OCc4cccc(F)c4)c(Cl)c3)c2c1)N(CCCl)CCCl	5.49485	683.103	8	2	7.2935	FALSE
CHEMBL3632637	3290	nM	CCOC(=O)C(=CNc1ccc2ncnc(Nc3ccc(OCc4ccccn4)c(Cl)c3)c2c1)C(=O)OCC	5.4828	547.162	10	2	5.4228	FALSE
CHEMBL595142	3600	nM	COc1cc2c(Nc3ccc(-c4nc5ccccc5s4)cc3O)ncnc2cc1OCCCN1CCN(C)CC1	5.4437	556.226	10	2	5.3806	FALSE
CHEMBL1928954	3740	nM	O=C(/C=C/c1ccccc1)Nc1cccc(Oc2cc(Nc3ccc(OCc4cccc(F)c4)c(Cl)c3)ncn2)c1	5.42713	566.152	6	2	8.0359	FALSE
CHEMBL1683960	3750	nM	Cc1ncnc(Nc2ccc(OCc3cccc(F)c3)c(Cl)c2)c1-c1cccc(CN2CCOCC2)c1	5.42597	518.188	6	1	6.39932	FALSE
CHEMBL1080271	3840	nM	CCN(CC)CCNC(=O)c1cc2cnnc(Nc3ccc(OCc4cccc(F)c4)c(Cl)c3)c2[nH]1	5.41567	510.195	6	3	5.1446	FALSE
CHEMBL1256417	4030	nM	Cc1cc(C)c2oc(Nc3ccc(-c4nn([C@H]5CC[C@@H](N6CCN(C)CC6)CC5)c5ncnc(N)c45)cc3F)nc2c1	5.39469	569.303	10	2	5.44734	FALSE
CHEMBL421047	4130	nM	CN(C)C/C=C/C(=O)Nc1cc2c(Nc3ccc(F)c(Cl)c3)c(C#N)cnc2cc1OC(F)(F)F	5.38405	507.109	6	2	5.59748	FALSE
CHEMBL2333164	4500	nM	O=C1NCCc2ccc(O)c(c2)Oc2c(Br)cc(cc2Br)CCNC(=O)/C(=N/O)Cc2cc(Br)c(O)c(c2)Oc2c(Br)cc(cc2Br)C/C1=N\O	5.34679	1013.77	10	6	8.2715	FALSE
CHEMBL3142195	4500	nM	CC(C)O[C@@H]1[C@H](OC(C)C)[C@@H](COC(=O)CCCC(=O)Oc2ccc(/C=C/[N+](=O)[O-])cc2)O[C@H]1n1cnc2c(N)ncnc21	5.34679	612.254	14	1	3.4596	FALSE
CHEMBL601828	4530	nM	O=C(Nc1ccccc1)N(Cc1ccc(O)cc1)Cc1cc(Br)cc(Br)c1O	5.3439	503.968	3	3	5.8571	FALSE
CHEMBL5174439	4860	nM	FC(F)(F)c1ccc(/C=C/c2nc(Cn3ccc4cc(-c5ccc(Br)cc5)ccc43)co2)cc1	5.31336	522.055	3	0	8.2963	FALSE
CHEMBL3633936	5050	nM	CCOC(=O)C(=CNc1ccc2ncnc(Nc3ccc(OCc4cccc(F)c4)c(Cl)c3)c2c1)C(=O)OCC	5.29671	564.158	9	2	6.1669	FALSE
CHEMBL1256423	5230	nM	Cc1cc(Cl)c2oc(Nc3ccc(-c4nn([C@H]5CC[C@@H](N6CCN(C)CC6)CC5)c5ncnc(N)c45)cc3)nc2c1	5.2815	571.257	10	2	5.65322	FALSE
CHEMBL3746421	5620	nM	CC(=O)N1N=C(c2ccc(C(F)(F)F)cc2)CC1c1ccc(C(=O)OC(C)Cn2c([N+](=O)[O-])cnc2C)cc1	5.25026	543.173	8	0	5.06162	FALSE
CHEMBL595374	5900	nM	COc1cc2ncnc(Nc3ccc(-c4nc5ccccc5s4)cc3C)c2cc1OCCCN1CCN(C)CC1	5.22915	554.246	9	1	5.98342	FALSE
CHEMBL4078431	6000	nM	COc1cc2ncnc(Nc3cccc(Br)c3)c2cc1OCCCOP(N)(=O)N(CCCl)CCCl	5.22185	605.036	7	2	5.7764	FALSE
CHEMBL592201	6730	nM	Oc1c(Br)cc(Br)cc1CN(Cc1ccc(F)cc1)C(=S)Nc1ccccc1	5.17198	521.941	2	2	6.4555	FALSE
CHEMBL604992	6950	nM	COc1cc2c(Nc3ccc(-c4nc5ccc(F)cc5s4)cc3)ncnc2cc1OCCCN1CCN(C)CC1	5.15802	558.221	9	1	5.8141	FALSE
CHEMBL4516916	6960	nM	Fc1ccc(-c2csc(N3N=C(c4ccc(N5CCOCC5)cc4)CC3c3ccc(Cl)cc3)n2)cc1	5.15739	518.134	6	0	6.7949	FALSE
CHEMBL510730	7000	nM	O=C1NCCc2cc(Br)c(O)c(c2)Oc2c(Br)cc(cc2Br)CCNC(=O)/C(=N/O)Cc2cc(Br)c(O)c(c2)Oc2c(Br)cc(cc2Br)C/C1=N\O	5.1549	1091.69	10	6	9.034	FALSE
CHEMBL3651854	7800	nM	Cc1cc(Nc2nc(Nc3ccccc3S(=O)(=O)C(C)C)c3c(C)[nH]nc3n2)c(OC(C)C)cc1C1CCN(C)CC1	5.10791	591.299	9	3	6.23544	FALSE
CHEMBL633	9148	nM	CCCCc1oc2ccccc2c1C(=O)c1cc(I)c(OCCN(CC)CC)c(I)c1	5.03867	645.024	4	0	6.9362	FALSE
CHEMBL5193640	9280	nM	FC(F)(F)c1ccc(/C=C/c2nc(Cn3ccc4cc(-c5ccccc5Br)ccc43)co2)cc1	5.03245	522.055	3	0	8.2963	FALSE
CHEMBL4169245	9710	nM	O=S(=O)(NCCc1cccc(F)c1)c1cc(-c2ccccc2COc2cccc(C(F)(F)F)c2)cc(C(F)(F)F)c1	5.01278	597.121	3	1	7.6303	FALSE
CHEMBL4173044	10400	nM	O=S(=O)(NCCc1cccc(F)c1)c1cc(-c2cccc3c2Sc2ccccc2S3)cc(C(F)(F)F)c1	4.98297	561.051	4	1	7.6483	FALSE
CHEMBL428647	11108	nM	CC(=O)O[C@H]1C(=O)[C@@]2(C)[C@H]([C@H](OC(=O)c3ccccc3)[C@]3(O)C[C@H](OC(=O)[C@H](O)[C@@H](NC(=O)c4ccccc4)c4ccccc4)C(C)=C1C3(C)C)[C@]1(OC(C)=O)CO[C@@H]1C[C@@H]2O	4.95436	853.331	14	4	3.7357	FALSE
CHEMBL603186	12420	nM	O=C(Nc1ccccc1)N(Cc1ccc(F)cc1)Cc1cc(Br)cc(Br)c1O	4.90588	505.964	2	2	6.2906	FALSE
CHEMBL4162777	18000	nM	O=S(=O)(NCCc1cccc(F)c1)c1cc(-c2ccc(COc3cccc(C(F)(F)F)c3)cc2)cc(C(F)(F)F)c1	4.74473	597.121	3	1	7.6303	FALSE
CHEMBL4280835	19200	nM	CS(=O)(=O)Nc1ccc(-c2cc3c(Nc4ccc(Oc5cccc(C(F)(F)F)c5)c(Cl)c4)ncnc3s2)cc1	4.7167	590.046	7	2	7.9379	FALSE
CHEMBL4162362	25400	nM	COCCc1ccc(OCc2ccc(-c3cc(C(F)(F)F)cc(S(=O)(=O)NCCc4cccc(F)c4)c3)cc2)cc1	4.59517	587.175	4	1	6.8004	FALSE
CHEMBL3133827	28300	nM	O=S(=O)(c1ccc2[nH]c3nccc(Nc4cccc(OCc5ccccc5)c4)c3c2c1)N1CCOCC1	4.54821	514.167	6	2	5.0596	FALSE
CHEMBL4161318	31500	nM	O=S(=O)(NCCc1cccc(F)c1)c1cc(-c2ccc(-c3cccs3)s2)cc(C(F)(F)F)c1	4.50169	511.036	4	1	6.8225	FALSE
CHEMBL4569508	35000	nM	O=C(NCC(F)(F)F)c1cc(-c2cnn3cc(-c4ccc(OCCN5CCCCC5)cc4)cnc23)cs1	4.45593	529.176	7	1	5.2816	FALSE
CHEMBL4286733	37100	nM	O=C(Nc1ccc(-c2cc3c(Nc4ccc(Oc5cccc(C(F)(F)F)c5)c(Cl)c4)ncnc3s2)cc1)NC1CC1	4.43063	595.106	6	3	8.8503	FALSE
CHEMBL1095259	37930	nM	N=C1N=C(NCCS(=O)(=O)O)/C(=C/C(O)CNC(=O)c2cc(Br)c(Br)[nH]2)N1	4.42102	525.927	6	7	-0.07183	FALSE
