# Supplementary material for: AI-Driven Drug Discovery for Breast Cancer Based on ERBB2 Identified Through Network Pharmacology and GEO Data Analysis
Source: Research Square preprint supplement (doi:10.21203/rs.3.rs-6047847/v1), 2025-02-26
Supplement: Supplementary file 10 [file e07635a4a0ae7c0ec8780e01.xlsx]

## Sheet: ANN
S6.ANN model screening for core genes
geneNames	Importance
BCL2	0.0655543
MYC	0.068468
JUN	0.0674522
HMOX1	0.0621123
ERBB2	0.0692807
ABL1	0.0733089
GRB2	0.0615681
AURKA	0.0614588
CCNE1	0.0660799
ROCK1	0.0626717
PLK1	0.0657097
CDC25A	0.0728398
GJA1	0.0786026
PTPN1	0.0734986
SIRT2	0.0665099
SREBF2	0.06516
VCP	0.0674544
JUNB	0.0675282
PTGER4	0.0660307
ROCK2	0.0670927
FABP4	0.0671097
