# Supplementary material for: AI-Driven Drug Discovery for Breast Cancer Based on ERBB2 Identified Through Network Pharmacology and GEO Data Analysis
Source: Research Square preprint supplement (doi:10.21203/rs.3.rs-6047847/v1), 2025-02-26
Supplement: Supplementary file 11 [file e110c520f7c7ff6078e5c456.xlsx]

## Sheet: SVM
S3.SVM model screening for core genes
Gene	Importance
PRKCD	0.0393842
PTPN1	0.0389671
JUNB	0.0359544
JUN	0.033622
CREB1	0.0330266
ROCK2	0.0328765
ERBB2	0.0320072
GRB2	0.0297018
HMOX1	0.0279897
VCP	0.0266673
