# Supplementary material for: AI-Driven Drug Discovery for Breast Cancer Based on ERBB2 Identified Through Network Pharmacology and GEO Data Analysis
Source: Research Square preprint supplement (doi:10.21203/rs.3.rs-6047847/v1), 2025-02-26
Supplement: Supplementary file 12 [file e7082ad1d729474f7fa549ba.xlsx]

## Sheet: 1832compounds
S7.Bioactivities compounds from ChEMBL
molecule_chembl_id	IC50	units	smiles	pIC50
CHEMBL941	0.06	nM	Cc1ccc(NC(=O)c2ccc(CN3CCN(C)CC3)cc2)cc1Nc1nccc(-c2cccnc2)n1	10.2218
CHEMBL5221067	0.14	nM	N#Cc1c(NC(=O)CNc2n[nH]c3ncccc23)sc2c1CCCC2	9.85387
CHEMBL437890	0.5	nM	CN1CCN(CCC#CC(=O)Nc2cc3c(Nc4ccc(F)c(Br)c4)ncnc3cn2)CC1	9.30103
CHEMBL3344216	0.5	nM	CN(C)[C@H](CS(C)(=O)=O)c1ccc(-c2ccc3ncnc(Nc4ccc(OCc5cccc(F)c5)c(Cl)c4)c3c2)o1	9.30103
CHEMBL203599	0.7	nM	CN1CCN(CCC#CC(=O)Nc2cc3c(Nc4ccc(F)c(Cl)c4)ncnc3cn2)CC1	9.1549
CHEMBL204638	0.7	nM	O=C(C#CCCN1CCOCC1)Nc1cc2c(Nc3ccc(F)c(Br)c3)ncnc2cn1	9.1549
CHEMBL203661	0.8	nM	O=C(C#CCCN1CCOCC1)Nc1cc2c(Nc3ccc(F)c(Cl)c3)ncnc2cn1	9.09691
CHEMBL2048911	0.92	nM	Cl.O=C(NCCn1ccc2ncnc(Nc3ccc(Oc4cccc5sncc45)c(Cl)c3)c21)[C@@H]1CCCN1	9.03621
CHEMBL5282641	0.96	nM	C=CC(=O)N1CCC(Oc2cc3c(Nc4ccc(Cl)c(Cl)c4F)ncnc3cc2O[C@H]2CCOC2)CC1	9.01773
CHEMBL2048912	0.98	nM	CC(C)(N)C(=O)NCCn1ccc2ncnc(Nc3ccc(Oc4cccc5sncc45)c(Cl)c3)c21	9.00877
CHEMBL3344210	1	nM	CNC(CS(C)(=O)=O)c1ccc(-c2ccc3ncnc(Nc4ccc(OCc5cccc(F)c5)c(Cl)c4)c3c2)o1	9
CHEMBL483332	1	nM	C[C@H](CN(C)C)Oc1cccc2ncnc(Nc3ccc(OCc4cnccn4)c(Cl)c3)c12	9
CHEMBL490062	1	nM	CS(=O)(=O)CCNCc1ccc(-c2ccc3ncnc(Nc4ccc5c(cnn5Cc5ccccc5)c4)c3c2)o1	9
CHEMBL258282	1	nM	CN1CCN(CCOc2n[nH]c3ncnc(Nc4ccc(OCc5ccccn5)c(Cl)c4)c23)CC1	9
CHEMBL4105329	1	nM	Cc1n[nH]c2ccc(-c3cc(N[C@@H](CO)c4ccccc4)cnc3-c3cc(Cl)ccc3O)cc12	9
CHEMBL4067871	1	nM	OC[C@H](Nc1cnc(-c2cc(Cl)ccc2O)c(-c2ccc3cnccc3c2)c1)c1ccccc1	9
CHEMBL4075917	1	nM	Cc1n[nH]c2ccc(-c3cc(N[C@@H](CO)c4ccccc4)cnc3-c3ccc(F)cc3O)cc12	9
CHEMBL5176920	1.06	nM	Cc1cc(Nc2ncnc3cc(O)c(NC(=O)/C=C/[C@H]4CCCN4C)cc23)ccc1Oc1cc2nccn2cn1	8.97469
CHEMBL203644	1.1	nM	CC#CC(=O)Nc1cc2c(Nc3ccc(F)c(Cl)c3)ncnc2cn1	8.95861
CHEMBL54091	1.1	nM	C=CC(=O)Nc1cc2c(Nc3ccc(F)c(Br)c3)ncnc2cn1	8.95861
CHEMBL2048789	1.3	nM	O=C1NCc2ccc(Oc3ccc(Nc4ncnc5ccn(CCO)c45)cc3Cl)cc21	8.88606
CHEMBL3357637	1.38	nM	CCOc1cc2ncnc(Nc3ccc(OCc4ccccn4)c(Cl)c3)c2cc1NC(=O)/C(F)=C/CN(C)C	8.86012
CHEMBL5179954	1.4	nM	Cc1cc(Nc2ncnc3ccc(NC(=O)/C=C/[C@H]4CCCN4C)cc23)ccc1Oc1cc2nncn2cn1	8.85387
CHEMBL5288888	1.42	nM	C=CC(=O)N1CCC(Oc2cc3c(Nc4cccc(Cl)c4F)ncnc3cc2O[C@H]2CCOC2)CC1	8.84771
CHEMBL5193451	1.43	nM	Cc1cc(Nc2ncnc3cc(O)c(NC(=O)/C=C/[C@H]4CCCN4C)cc23)ccc1Oc1ccn2ncnc2c1	8.84466
CHEMBL2048795	1.5	nM	O=C1Cc2cccc(Oc3ccc(Nc4ncnc5ccn(CCO)c45)cc3Cl)c2N1	8.82391
CHEMBL2048906	1.6	nM	CC(=O)NCCn1ccc2ncnc(Nc3ccc(Oc4cccc5sncc45)c(Cl)c3)c21	8.79588
CHEMBL2048796	1.6	nM	O=C1Cc2c(cccc2Oc2ccc(Nc3ncnc4ccn(CCO)c34)cc2Cl)N1	8.79588
CHEMBL5184610	1.67	nM	CCOc1cc2ncnc(Nc3ccc(Oc4cc5nncn5cn4)c(C)c3)c2cc1NC(=O)/C=C/[C@H]1CCCN1C	8.77728
CHEMBL2048903	1.7	nM	OCCn1ccc2ncnc(Nc3ccc(Oc4cccc5[nH]ncc45)c(Cl)c3)c21	8.76955
CHEMBL5192750	1.7	nM	Cc1cc(Nc2ncnc3cc(O)c(NC(=O)/C=C/[C@H]4CCCN4C)cc23)ccc1Oc1ccn2ccnc2c1	8.76955
CHEMBL202360	1.9	nM	C#CC(=O)Nc1ccc2ncnc(Nc3cccc(Br)c3)c2c1	8.72125
CHEMBL4786257	1.9	nM	C=CC(=O)Nc1cc(-c2c[nH]c3ncnc(Nc4ccc(OCc5ccccn5)c(Cl)c4)c23)ccc1OCCO	8.72125
CHEMBL5175489	1.93	nM	C=CC(=O)Nc1cc2c(Nc3ccc(Oc4cc5nncn5cn4)c(C)c3)ncnc2cc1OCC	8.71444
CHEMBL1173655	2	nM	CN(C)C/C=C/C(=O)Nc1cc2c(Nc3ccc(F)c(Cl)c3)ncnc2cc1O[C@H]1CCOC1	8.69897
CHEMBL1630117	2	nM	O=C(NO)c1ccc(-c2ccc3ncnc(Nc4ccc(OCc5cccc(F)c5)c(Cl)c4)c3c2)o1	8.69897
CHEMBL2103842	2	nM	C[C@@H]1COC(Nc2ccc3ncnc(Nc4ccc(OCc5nccs5)c(Cl)c4)c3c2)=N1	8.69897
CHEMBL402553	2	nM	Clc1cc(Nc2ncnc3[nH]nc(OCCN4CCCC4)c23)ccc1OCc1ccccn1	8.69897
CHEMBL3968417	2	nM	CN(C)C/C=C/C(=O)Nc1cc2c(Nc3ccc(F)c(Cl)c3)ncnc2cn1	8.69897
CHEMBL2048909	2	nM	CC(C)(C(=O)NCCn1ccc2ncnc(Nc3ccc(Oc4cccc5sncc45)c(Cl)c3)c21)S(C)(=O)=O	8.69897
CHEMBL497459	2	nM	CN(C)/N=C/c1c(N)ncnc1Nc1ccc2c(cnn2Cc2cccc(F)c2)c1	8.69897
CHEMBL403569	2	nM	O=C(CO)N1CCC[C@H]1COc1cccc2ncnc(Nc3ccc(OCc4ccccn4)c(Cl)c3)c12	8.69897
CHEMBL518750	2	nM	CC(C)(Oc1cccc2ncnc(Nc3ccc(OCc4ccccn4)c(Cl)c3)c12)C(N)=O	8.69897
CHEMBL2048904	2.1	nM	Cn1ncc2c(Oc3ccc(Nc4ncnc5ccn(CCO)c45)cc3Cl)cccc21	8.67778
CHEMBL205059	2.1	nM	O=C(C#CCCN1CCCCC1)Nc1cc2c(Nc3ccc(F)c(Cl)c3)ncnc2cn1	8.67778
CHEMBL1923009	2.1	nM	OCCOCCn1ccc2ncnc(Nc3ccc(Oc4cccc(Cl)c4)c(Cl)c3)c21	8.67778
CHEMBL4522240	2.1	nM	COc1cc2ncnc(Nc3ccc(OCc4cccc(F)c4)c(Cl)c3)c2cc1OCCCN1CCNCCNCCNCC1	8.67778
CHEMBL202411	2.1	nM	O=C(C#CCO)Nc1ccc2ncnc(Nc3ccc(F)c(Cl)c3)c2c1	8.67778
CHEMBL2048905	2.1	nM	OCCn1ccc2ncnc(Nc3ccc(Oc4cccc5sncc45)c(Cl)c3)c21	8.67778
CHEMBL2048907	2.2	nM	CC(C)(O)C(=O)NCCn1ccc2ncnc(Nc3ccc(Oc4cccc5sncc45)c(Cl)c3)c21.CS(=O)(=O)O	8.65758
CHEMBL204085	2.3	nM	O=C(C#CCCN1CCOCC1)Nc1ccc2ncnc(Nc3ccc(F)c(Cl)c3)c2c1	8.63827
CHEMBL2048788	2.3	nM	CC(C)(C)NC(=O)c1cccc(Oc2ccc(Nc3ncnc4ccn(CCO)c34)cc2Cl)c1	8.63827
CHEMBL378144	2.4	nM	C#CC(=O)Nc1cc2c(Nc3cccc(Br)c3)ncnc2cn1	8.61979
CHEMBL5190132	2.41	nM	Cc1cc(Nc2ncnc3cc(O)c(NC(=O)/C=C/[C@H]4CCCN4C)cc23)ccc1Oc1cnc2ccnn2c1	8.61798
CHEMBL2048794	2.5	nM	O=C1NCc2cccc(Oc3ccc(Nc4ncnc5ccn(CCO)c45)cc3Cl)c21	8.60206
CHEMBL2048797	2.5	nM	OCCn1ccc2ncnc(Nc3ccc(Oc4cccc5[nH]ccc45)c(Cl)c3)c21	8.60206
CHEMBL5203179	2.55	nM	COCC(=O)NC/C=C/c1ccc2ncnc(Nc3ccc(Oc4cc5nncn5cn4)c(C)c3)c2c1	8.59346
CHEMBL382073	2.6	nM	CCN(CC)CCC#CC(=O)Nc1ccc2ncnc(Nc3ccc(F)c(Cl)c3)c2c1	8.58503
CHEMBL380669	2.8	nM	CC(C)N(CC#CC(=O)Nc1ccc2ncnc(Nc3ccc(F)c(Cl)c3)c2c1)C(C)C	8.55284
CHEMBL1923022	2.8	nM	CS(=O)(=O)O.O=C(CCO)NCCn1ccc2ncnc(Nc3ccc(Oc4cccc(C(F)(F)F)c4)c(Cl)c3)c21	8.55284
CHEMBL5175873	2.85	nM	Cc1cc(Nc2ncnc3ccc(NC(=O)/C=C/CN(C)C)cc23)ccc1Oc1cc2nncn2cn1	8.54516
CHEMBL2148050	2.9	nM	CS(=O)(=O)CC(=O)NCCn1ccc2ncnc(Nc3ccc(Oc4cccc(Cl)c4)c(Cl)c3)c21	8.5376
CHEMBL3344215	2.9	nM	CS(=O)(=O)C[C@@H](N)c1ccc(-c2ccc3ncnc(Nc4ccc(OCc5cccc(F)c5)c(Cl)c4)c3c2)o1	8.5376
CHEMBL2408045	3	nM	CNC(=O)CN1CCC(Oc2cc3c(Nc4cccc(Cl)c4F)ncnc3cc2OC)CC1	8.52288
CHEMBL255135	3	nM	CNCCOc1n[nH]c2ncnc(Nc3ccc(OCc4ccccn4)c(Cl)c3)c12	8.52288
CHEMBL53555	3	nM	C=CC(=O)Nc1cc2c(Nc3ccc(F)c(Cl)c3)ncnc2cn1	8.52288
CHEMBL257430	3	nM	Clc1cc(Nc2ncnc3[nH]nc(OCCN4CCNCC4)c23)ccc1OCc1ccccn1	8.52288
CHEMBL402339	3	nM	COc1cc(Nc2ncnc3[nH]nc(OCCN4CCC(O)CC4)c23)ccc1OCc1cccc(F)c1	8.52288
CHEMBL1923003	3.3	nM	Cn1ccc2ncnc(Nc3ccc(Oc4cccc(Cl)c4)c(Cl)c3)c21	8.48149
CHEMBL2048908	3.3	nM	CC(C)(CO)C(=O)NCCn1ccc2ncnc(Nc3ccc(Oc4cccc5sncc45)c(Cl)c3)c21	8.48149
CHEMBL5176854	3.38	nM	CCOc1cc2ncnc(Nc3ccc(Oc4cc5nncn5cn4)c(C)c3)c2cc1NC(=O)/C(F)=C/[C@@H]1CCCN1C	8.47108
CHEMBL3344209	3.4	nM	CS(=O)(=O)CC(N)c1ccc(-c2ccc3ncnc(Nc4ccc(OCc5cccc(F)c5)c(Cl)c4)c3c2)o1	8.46852
CHEMBL1630108	3.5	nM	O=C(/C=C/c1ccc(-c2ccc3ncnc(Nc4ccc(OCc5cccc(F)c5)c(Cl)c4)c3c2)s1)NO	8.45593
CHEMBL4755170	3.5	nM	C=CC(=O)Nc1cccc(-c2c[nH]c3ncnc(Nc4ccc5[nH]c(Cc6ccccc6)nc5c4)c23)c1	8.45593
CHEMBL1630118	3.5	nM	O=C(NO)c1ccc(-c2ccc3ncnc(Nc4ccc(OCc5cccc(F)c5)c(Cl)c4)c3c2)s1	8.45593
CHEMBL5182567	3.5	nM	C=CC(=O)Nc1ccc2ncnc(Nc3ccc4[nH]cc(Br)c4c3)c2c1	8.45593
CHEMBL5178703	3.51	nM	CCOc1cc2ncnc(Nc3ccc(Oc4cc5nncn5cn4)c(C)c3)c2cc1NC(=O)/C(F)=C/[C@H]1CCCN1C	8.45469
CHEMBL3344208	3.6	nM	CN(C)C(CS(C)(=O)=O)c1ccc(-c2ccc3ncnc(Nc4ccc(OCc5cccc(F)c5)c(Cl)c4)c3c2)o1	8.4437
CHEMBL5181694	3.68	nM	CCOc1cc2ncnc(Nc3ccc(Oc4cc5nncn5cn4)c(C)c3)c2cc1NC(=O)/C(F)=C\[C@@H]1CCCN1C	8.43415
CHEMBL4794670	3.7	nM	C=CC(=O)Nc1cc2c(Nc3ccc(OCc4cccc(F)c4)c(Cl)c3)ncnc2cc1OCc1cn(CCCC(=O)NO)nn1	8.4318
CHEMBL4758842	3.7	nM	C=CC(=O)Nc1cc2c(Nc3ccc(OCc4cccc(F)c4)c(Cl)c3)ncnc2cc1OCc1cn(CCC(=O)NO)nn1	8.4318
CHEMBL572091	3.8	nM	CN1C[C@@H](OC(=O)N2CC=CC2)C[C@H](C(=O)NO)[C@H]1C(=O)N1CCN(c2ccccc2)CC1	8.42022
CHEMBL203645	3.8	nM	CCCC#CC(=O)Nc1cc2c(Nc3ccc(F)c(Cl)c3)ncnc2cn1	8.42022
CHEMBL566233	3.8	nM	O=C(NO)[C@H]1C[C@H](OC(=O)N2CCCC2)CN[C@@H]1C(=O)N1CCN(c2ccccc2)CC1	8.42022
CHEMBL4758761	3.8	nM	C=CC(=O)Nc1cc2c(Nc3ccc(OCc4cccc(F)c4)c(Cl)c3)ncnc2cc1OCc1cn(CCCCC(=O)NO)nn1	8.42022
CHEMBL4757592	3.9	nM	C=CC(=O)Nc1cccc(-c2c(-c3ccc(N4CCN(C)CC4)cc3)[nH]c3ncnc(Nc4ccc(O)cc4)c23)c1	8.40894
CHEMBL2437226	3.9	nM	Cc1ccc(S(=O)(=O)O)cc1.NS(=O)(=O)CCNCc1ccc(-c2ccc3ncnc(Nc4ccc(OCc5cccc(F)c5)c(Cl)c4)c3c2)o1	8.40894
CHEMBL51659	3.9	nM	C=CC(=O)Nc1cc2c(Nc3cccc(Br)c3)ncnc2cn1	8.40894
CHEMBL4635100	4	nM	O=C(/C=C/CN1CCCC1)N1CCOc2cc3ncnc(Nc4ccc(OCc5cccc(F)c5)c(Cl)c4)c3cc21	8.39794
CHEMBL3959248	4	nM	COCCOc1cc2ncnc(Nc3ccc4c(cnn4Cc4ccccc4)c3)c2cc1NC(=O)/C=C/CN(C)C	8.39794
CHEMBL1645473	4	nM	NC1CCN(Cc2ccn3ncnc(Nc4cccc(Cl)c4)c23)CC1	8.39794
CHEMBL411897	4	nM	COC1CCN(CCOc2n[nH]c3ncnc(Nc4ccc(OCc5ccccn5)c(Cl)c4)c23)CC1	8.39794
CHEMBL257861	4	nM	OCCOc1n[nH]c2ncnc(Nc3ccc(OCc4ccccn4)c(Cl)c3)c12	8.39794
CHEMBL272935	4	nM	CN1CCN(CCCOc2n[nH]c3ncnc(Nc4ccc(OCc5ccccn5)c(Cl)c4)c23)CC1	8.39794
CHEMBL4648271	4	nM	CCN(CC)C/C=C/C(=O)N1CCOc2cc3ncnc(Nc4ccc(OCc5cccc(F)c5)c(Cl)c4)c3cc21	8.39794
CHEMBL479171	4	nM	OCc1ccc(-c2cc3c(Nc4ccc(OCc5ccccc5)cc4)ncnc3cn2)o1	8.39794
CHEMBL249928	4	nM	CN(CCOc1cccc2ncnc(Nc3ccc(OCc4ccccn4)c(Cl)c3)c12)C(=O)CO	8.39794
CHEMBL1080506	4	nM	Cc1c(C(=O)NCCN2CCOCC2)[nH]c2cnnc(Nc3ccc(OCc4cccc(F)c4)c(Cl)c3)c12	8.39794
CHEMBL1645474	4	nM	NC1CCN(Cc2ccn3ncnc(Nc4cccc(Br)c4)c23)CC1	8.39794
CHEMBL5183924	4.05	nM	C=C(F)C(=O)Nc1cc2c(Nc3ccc(Oc4cc5nncn5cn4)c(C)c3)ncnc2cc1OCC	8.39254
CHEMBL2148051	4.1	nM	CC(C(=O)NCCn1ccc2ncnc(Nc3ccc(Oc4cccc(Cl)c4)c(Cl)c3)c21)S(C)(=O)=O	8.38722
CHEMBL1923006	4.1	nM	OCCn1ccc2ncnc(Nc3ccc(Oc4cccc(Cl)c4)c(Cl)c3)c21	8.38722
CHEMBL1630107	4.1	nM	O=C(/C=C/c1ccc(-c2ccc3ncnc(Nc4ccc(OCc5cccc(F)c5)c(Cl)c4)c3c2)o1)NO	8.38722
CHEMBL288812	4.2	nM	Cn1nc(C(C)(C)C)cc1NC(=O)Nc1ccc(Cc2ccncc2)cc1	8.37675
CHEMBL31373	4.3	nM	C=CC(=O)Nc1ccc2ncnc(Nc3ccc(F)c(Cl)c3)c2c1	8.36653
CHEMBL1923019	4.3	nM	O=C(CO)NCCn1ccc2ncnc(Nc3ccc(Oc4cccc(C(F)(F)F)c4)c(Cl)c3)c21	8.36653
CHEMBL569166	4.3	nM	O=C(NO)[C@H]1CC(CC(=O)N2CCCC2)CN[C@@H]1C(=O)N1CC=C(c2ccccc2)CC1	8.36653
CHEMBL1090357	4.3	nM	CN(C)CCc1ccc(Nc2nccc(-c3c(-c4cccc(NC(=O)c5c(F)cccc5F)c4)nc4sccn34)n2)cc1	8.36653
CHEMBL572302	4.4	nM	CN1C[C@@H](OC(=O)N2CCCCCC2)C[C@H](C(=O)NO)[C@H]1C(=O)N1CCN(c2ccccc2)CC1	8.35655
CHEMBL4743509	4.5	nM	C=CC(=O)Nc1cccc(-c2c(-c3ccc(N4CCN(C)CC4)cc3)[nH]c3ncnc(Nc4ccc(OC(c5ccccc5)c5ccccc5)cc4)c23)c1	8.34679
CHEMBL4781593	4.5	nM	C=CC(=O)Nc1cccc(-c2c[nH]c3ncnc(Nc4ccc(OCN5C(=O)c6ccccc6C5=O)cc4)c23)c1	8.34679
CHEMBL1922999	4.6	nM	Cc1cccc(Oc2ccc(Nc3ncnc4cc[nH]c34)cc2Cl)c1	8.33724
CHEMBL1630116	4.7	nM	Nc1ccccc1NC(=O)CCc1ccc(-c2ccc3ncnc(Nc4ccc(OCc5cccc(F)c5)c(Cl)c4)c3c2)cc1	8.3279
CHEMBL3353410	4.8	nM	C=CC(=O)Nc1cc(Nc2nccc(-c3cn(C)c4ccccc34)n2)c(OC)cc1N(C)CCN(C)C	8.31876
CHEMBL1090350	4.8	nM	O=C(Nc1cccc(-c2nc3sccn3c2-c2ccnc(Nc3ccc(N4CCOCC4)cc3)n2)c1)c1ccccc1	8.31876
CHEMBL1630112	4.9	nM	Nc1ccccc1NC(=O)c1ccc(-c2ccc3ncnc(Nc4ccc(OCc5cccc(F)c5)c(Cl)c4)c3c2)s1	8.3098
CHEMBL1645470	5	nM	Cc1cccc(Nc2ncnn3ccc(CN4CCC(N)CC4)c23)c1	8.30103
CHEMBL3890186	5	nM	COCCOc1cc2ncnc(Nc3ccc4c(cnn4Cc4ccccc4)c3)c2cc1NC(=O)/C=C/CN1CCCC1	8.30103
CHEMBL257873	5	nM	Cc1ccc(Oc2ccc(Nc3ncnc4[nH]nc(OCCN5CCC(O)CC5)c34)cc2F)cn1	8.30103
CHEMBL403435	5	nM	Cc1cc(Nc2ncnc3[nH]nc(OCCN4CCC(O)CC4)c23)ccc1OCc1ccccn1	8.30103
CHEMBL404405	5	nM	OC1CCN(CCOc2n[nH]c3ncnc(Nc4ccc(OCc5ccccn5)c(Cl)c4)c23)CC1	8.30103
CHEMBL444619	5	nM	COc1cc(ON2CCC(C)CC2)c2c(Nc3ccc(OCc4ccccn4)c(Cl)c3)ncnc2c1	8.30103
CHEMBL593860	5	nM	COc1cc2c(Nc3ccc(-c4nc5ccccc5s4)c(OC)c3)ncnc2cc1OCCCN1CCN(C)CC1	8.30103
CHEMBL1201179	5	nM	CS(=O)(=O)CCNCc1ccc(-c2ccc3ncnc(Nc4ccc(OCc5cccc(F)c5)c(Cl)c4)c3c2)o1.Cc1ccc(S(=O)(=O)O)cc1.Cc1ccc(S(=O)(=O)O)cc1.O	8.30103
CHEMBL136058	5	nM	O=C(/C=C/C(=O)Nc1cc2c(Nc3cccc(Br)c3)ncnc2cn1)NCCCN1CCOCC1	8.30103
CHEMBL1923010	5.1	nM	OCCOCCn1ccc2ncnc(Nc3ccc(Oc4cccc(C(F)(F)F)c4)c(Cl)c3)c21	8.29243
CHEMBL3545154	5.3	nM	C=CC(=O)N1CCC(Oc2cc3c(Nc4ccc(Cl)c(Cl)c4F)ncnc3cc2OC)CC1	8.27572
CHEMBL4763836	5.4	nM	Cc1cccc(Oc2ccc(Nc3ncnc4ccc(NC(=O)CN5CCN(C)CC5)cc34)cc2Cl)c1	8.26761
CHEMBL202424	5.4	nM	CCCCC#CC(=O)Nc1cc2c(Nc3ccc(F)c(Cl)c3)ncnc2cn1	8.26761
CHEMBL4793338	5.4	nM	C=CC(=O)Nc1cc2c(Nc3ccc(F)c(Cl)c3)ncnc2cc1OCc1cn(CCC(=O)NO)nn1	8.26761
CHEMBL576061	5.6	nM	O=C(NO)[C@H]1CC(CC(=O)N2CCCC2)CN[C@@H]1C(=O)N1CC[C@H](c2ccccc2)C1	8.25181
CHEMBL569388	5.6	nM	O=C(NO)[C@H]1CC(OC(=O)N2CCCC2)CN[C@@H]1C(=O)N1CC=C(c2ccccc2)CC1	8.25181
CHEMBL1630111	5.7	nM	Nc1ccccc1NC(=O)c1ccc(-c2ccc3ncnc(Nc4ccc(OCc5cccc(F)c5)c(Cl)c4)c3c2)o1	8.24413
CHEMBL1923020	5.7	nM	CN(CCn1ccc2ncnc(Nc3ccc(Oc4cccc(C(F)(F)F)c4)c(Cl)c3)c21)C(=O)CO	8.24413
CHEMBL4759072	5.7	nM	C=CC(=O)Nc1cc2c(Nc3ccc(F)c(Cl)c3)ncnc2cc1OCc1cn(CCCC(=O)NO)nn1	8.24413
CHEMBL285063	5.7	nM	C=CC(=O)Nc1ccc2ncnc(Nc3cccc(Br)c3)c2c1	8.24413
CHEMBL3892310	6	nM	CN(C)C/C=C/C(=O)Nc1cc2c(Nc3ccc(F)c(Cl)c3)ncnc2cc1OCC1C2COCC21	8.22185
CHEMBL480349	6	nM	CS(=O)(=O)CCNCc1ccc(-c2cc3c(Nc4ccc(OCc5cccc(F)c5)c(Cl)c4)ncnc3s2)o1	8.22185
CHEMBL257860	6	nM	OC1CCN(CCCOc2n[nH]c3ncnc(Nc4ccc(OCc5ccccn5)c(Cl)c4)c23)CC1	8.22185
CHEMBL587723	6	nM	CCN1CCN(Cc2ccc(-c3cc4c(N[C@H](C)c5ccccc5)ncnc4[nH]3)cc2)CC1	8.22185
CHEMBL255237	6	nM	COCCO/N=C/c1c(N)ncnc1Nc1ccc2c(cnn2Cc2cccc(F)c2)c1	8.22185
CHEMBL2048798	6	nM	OCCn1ccc2ncnc(Nc3ccc(Oc4cccc5sccc45)c(Cl)c3)c21	8.22185
CHEMBL1645476	6	nM	NC1CCN(Cc2ccn3ncnc(Nc4ccc(F)c(Cl)c4)c23)CC1	8.22185
CHEMBL1645471	6	nM	Cc1ccc(Nc2ncnn3ccc(CN4CCC(N)CC4)c23)cc1	8.22185
CHEMBL1645472	6	nM	NC1CCN(Cc2ccn3ncnc(Nc4cccc(F)c4)c23)CC1	8.22185
CHEMBL256784	6	nM	C[C@H](Oc1cccc2ncnc(Nc3ccc4c(cnn4Cc4cccc(F)c4)c3)c12)C(=O)N(C)C	8.22185
CHEMBL4796265	6.1	nM	CN1CCN(CC(=O)Nc2ccc3ncnc(Nc4ccc(OCc5cccc(F)c5)c(Cl)c4)c3c2)CC1	8.21467
CHEMBL2048910	6.1	nM	CC(C)(C)C(=O)NCCn1ccc2ncnc(Nc3ccc(Oc4cccc5sncc45)c(Cl)c3)c21.CS(=O)(=O)O	8.21467
CHEMBL4759112	6.2	nM	CN(C)C/C=C/C(=O)Nc1cc2ncnc(Nc3ccc(F)c(Cl)c3)c2cc1O[C@@H]1CCOC1	8.20761
CHEMBL1093234	6.3	nM	O=C(Nc1cccc(-c2nc3sccn3c2-c2ccnc(Nc3ccccc3)n2)c1)c1ccccc1	8.20066
CHEMBL2148044	6.3	nM	CS(=O)(=O)CC(=O)NCCn1ccc2ncnc(Nc3ccc(Oc4cccc(C(F)(F)F)c4)c(Cl)c3)c21	8.20066
CHEMBL5180965	6.31	nM	Cc1cc(Nc2ncnc3cc(O)c(NC(=O)/C=C/[C@H]4CCCN4C)cc23)ccc1Oc1ccn2cnnc2c1	8.19997
CHEMBL31419	6.4	nM	C=CC(=O)Nc1cc2c(Nc3cccc(Br)c3)ncnc2cc1OCCCN1CCOCC1	8.19382
CHEMBL5201973	6.42	nM	Cc1cc(Nc2ncnc3cc(O)c(NC(=O)/C=C/[C@H]4CCCN4C)cc23)ccc1Oc1ccc2nccn2c1	8.19246
CHEMBL3436359	6.8	nM	CC(=O)N1CCN(Cc2ccc(-c3ccc4ncnc(Nc5ccc(OCc6cccc(F)c6)c(Cl)c5)c4c3)o2)CC1.Cc1ccc(S(=O)(=O)O)cc1	8.16749
CHEMBL3989868	6.9	nM	Cc1cc(Nc2ncnc3ccc(NC4=NC(C)(C)CO4)cc23)ccc1Oc1ccn2ncnc2c1	8.16115
CHEMBL1645466	7	nM	C#Cc1cccc(Nc2ncnn3ccc(CN4CCC(N)CC4)c23)c1	8.1549
CHEMBL498133	7	nM	Nc1ncnc(Nc2ccc3c(cnn3Cc3cccc(F)c3)c2)c1/C=N/N1CCOCC1	8.1549
CHEMBL402294	7	nM	CCO/N=C/c1c(N)ncnc1Nc1ccc2c(cnn2Cc2cccc(F)c2)c1	8.1549
CHEMBL231102	7	nM	Cc1cc(Nc2ncnc3cnc(N4CCOCC4)cc23)ccc1OC1CCN(C(=O)Nc2c(F)cccc2F)CC1	8.1549
CHEMBL3290148	7	nM	C=CC(=O)NCC(=O)Nc1cccc(Nc2ncc(NC(=O)c3cc(NC(=O)c4cccc(C(F)(F)F)c4)ccc3C)cn2)c1	8.1549
CHEMBL2148048	7.1	nM	CC(C(=O)NCCn1ccc2ncnc(Nc3ccc(Oc4cccc(C(F)(F)F)c4)c(Cl)c3)c21)S(C)(=O)=O	8.14874
CHEMBL1090359	7.2	nM	O=C(Nc1cccc(-c2nc3sccn3c2-c2ccnc(Nc3ccc4c(c3)CCNC4)n2)c1)c1c(F)cccc1F	8.14267
CHEMBL5170965	7.3	nM	CCOc1cc2ncnc(Nc3ccc(Oc4cc5nncn5cn4)c(C)c3)c2cc1NC(=O)/C(F)=C\[C@H]1CCCN1C	8.13668
CHEMBL4744985	7.3	nM	C=CC(=O)Nc1cc2c(Nc3ccc(F)c(Cl)c3)ncnc2cc1OCc1cn(CCCCC(=O)NO)nn1	8.13668
CHEMBL584116	7.3	nM	CN1C[C@@H](OC(=O)N2CCCCC2)C[C@H](C(=O)NO)[C@H]1C(=O)N1CCN(c2ccccc2)CC1	8.13668
CHEMBL280757	7.3	nM	C=CC(=O)Nc1ccc2ncnc(Nc3ccc(F)c(Br)c3)c2c1	8.13668
CHEMBL1257998	7.5	nM	CN1CCN([C@H]2CC[C@H](n3nc(-c4ccc(Nc5nc6cccc(Cl)c6o5)cc4)c4c(N)ncnc43)CC2)CC1	8.12494
CHEMBL430571	7.6	nM	C=CC(=O)Nc1ccc2ncnc(Nc3ccc(OCc4ccccc4)cc3)c2c1	8.11919
CHEMBL1923013	7.7	nM	OCCNCCn1ccc2ncnc(Nc3ccc(Oc4cccc(C(F)(F)F)c4)c(Cl)c3)c21	8.11351
CHEMBL4758224	7.9	nM	C=CC(=O)Nc1cccc(-c2c[nH]c3ncnc(Nc4ccc5c(ccn5Cc5ccccc5)c4)c23)c1	8.10237
CHEMBL179363	8	nM	CCOc1cc2ncc(C#N)c(Nc3ccc(OCc4cccc(Cl)c4)c(Cl)c3)c2cc1NC(=O)/C=C/CN(C)C	8.09691
CHEMBL458098	8	nM	COc1cc(Nc2ncnc3ccc(-c4ccc(CN5C[C@@H]6[C@H](CO)[C@@H]6C5)cc4)cc23)ccc1Oc1ccccc1	8.09691
CHEMBL256783	8	nM	C[C@@H](Oc1cccc2ncnc(Nc3ccc4c(cnn4Cc4cccc(F)c4)c3)c12)C(=O)N(C)C	8.09691
CHEMBL1922901	8	nM	N#Cc1ccccc1Oc1ccc(Nc2ncnc3cc[nH]c23)cc1Cl	8.09691
CHEMBL498134	8	nM	CN1CCN(/N=C/c2c(N)ncnc2Nc2ccc3c(cnn3Cc3cccc(F)c3)c2)CC1	8.09691
CHEMBL4794998	8	nM	C=CC(=O)Nc1cc2c(Nc3cccc(Cl)c3F)ncnc2cc1OCc1cn(CCCC(=O)NO)nn1	8.09691
CHEMBL514566	8	nM	Nc1ncnc(Nc2ccc3c(cnn3Cc3cccc(F)c3)c2)c1/C=N/N1CCN(CCO)CC1	8.09691
CHEMBL4068839	8.1	nM	C=CC(=O)N1CCC[C@@H](n2nc(-c3ccc(OCc4ccccn4)c(Cl)c3)c3c(N)ncnc32)C1	8.09151
CHEMBL585886	8.1	nM	COC(=O)N1C[C@@H](OC(=O)N2CCCC2)C[C@H](C(=O)NO)[C@H]1C(=O)N1CCN(c2ccccc2)CC1	8.09151
CHEMBL342828	8.1	nM	O=C(/C=C/C(=O)Nc1cc2c(Nc3cccc(Br)c3)ncnc2cn1)NCCCn1ccnc1	8.09151
CHEMBL1922902	8.2	nM	N#Cc1cccc(Oc2ccc(Nc3ncnc4cc[nH]c34)cc2Cl)c1	8.08619
CHEMBL27685	8.2	nM	C=CC(=O)Nc1cc2c(Nc3ccc(F)c(Br)c3)ncnc2cc1OCCCN1CCOCC1	8.08619
CHEMBL4793731	8.3	nM	CN1CCN(CCCOc2ccc3ncnc(Nc4ccc(OCc5cccc(F)c5)c(Cl)c4)c3c2)CC1	8.08092
CHEMBL1921812	8.3	nM	Clc1cccc(Oc2ccc(Nc3ncnc4cc[nH]c34)cc2Cl)c1	8.08092
CHEMBL1923011	8.4	nM	OCCOCCn1ccc2ncnc(Nc3ccc(Oc4cccc(OC(F)(F)F)c4)c(Cl)c3)c21	8.07572
CHEMBL572301	8.5	nM	CC(C)OC(=O)N(C)C1CN[C@H](C(=O)N2CC=C(c3ccccc3)CC2)[C@@H](C(=O)NO)C1	8.07058
CHEMBL2148045	8.5	nM	CCS(=O)(=O)CC(=O)NCCn1ccc2ncnc(Nc3ccc(Oc4cccc(C(F)(F)F)c4)c(Cl)c3)c21	8.07058
CHEMBL2437224	8.5	nM	C[S+]([O-])CCNCc1ccc(-c2ccc3ncnc(Nc4ccc(OCc5cccc(F)c5)c(Cl)c4)c3c2)o1.Cc1ccc(S(=O)(=O)O)cc1	8.07058
CHEMBL53203	8.6	nM	C=CC(=O)Nc1ccc2ncnc(Nc3ccc(Oc4ccccc4)cc3)c2c1	8.0655
CHEMBL2437227	8.6	nM	Cc1ccc(S(=O)(=O)O)cc1.O=S(=O)(CCNCc1ccc(-c2ccc3ncnc(Nc4ccc(OCc5cccc(F)c5)c(Cl)c4)c3c2)o1)CC(F)(F)F	8.0655
CHEMBL1630113	8.7	nM	Nc1ccccc1NC(=O)/C=C/c1ccc(-c2ccc3ncnc(Nc4ccc(OCc5cccc(F)c5)c(Cl)c4)c3c2)o1	8.06048
CHEMBL54088	8.8	nM	C=CC(=O)Nc1cc2c(Nc3cccc(C)c3)ncnc2cn1	8.05552
CHEMBL554	9	nM	CS(=O)(=O)CCNCc1ccc(-c2ccc3ncnc(Nc4ccc(OCc5cccc(F)c5)c(Cl)c4)c3c2)o1	8.04576
CHEMBL31965	9	nM	C=CC(=O)Nc1cc2c(Nc3ccc(F)c(Cl)c3)ncnc2cc1OCCCN1CCOCC1	8.04576
CHEMBL3921302	9	nM	CN1CCN(c2ccc(Nc3ncnc4cc5oc(=O)n(CCOC(=O)CCl)c5cc34)cc2Cl)CC1	8.04576
CHEMBL1645467	9	nM	NC1CCN(Cc2ccn3ncnc(Nc4ccccc4)c23)CC1	8.04576
CHEMBL545315	9	nM	C=CC(=O)Nc1cc2c(Nc3ccc(F)c(Cl)c3)ncnc2cc1OCCCN1CCOCC1.Cl.Cl	8.04576
CHEMBL206029	9	nM	CS(=O)(=O)CCNC(=O)NCc1cccc(C#Cc2cncnc2Nc2ccc(OCc3cccc(F)c3)c(Cl)c2)n1	8.04576
CHEMBL3647420	9.07	nM	CCOc1cc2ncc(C#N)c(Nc3ccc(OCc4ccccn4)c(Cl)c3)c2cc1NC(=O)/C=C/[C@H]1CCCN1C	8.04239
CHEMBL1922898	9.3	nM	Fc1ccccc1Oc1ccc(Nc2ncnc3cc[nH]c23)cc1Cl	8.03152
CHEMBL4760739	9.3	nM	C=CC(=O)Nc1cc(-c2c[nH]c3ncnc(Nc4ccc(OCc5ccccn5)c(Cl)c4)c23)ccc1OCCCO	8.03152
CHEMBL1873475	9.4	nM	C=CC(=O)N1CCC[C@@H](n2nc(-c3ccc(Oc4ccccc4)cc3)c3c(N)ncnc32)C1	8.02687
CHEMBL1923014	9.4	nM	OCCSCCn1ccc2ncnc(Nc3ccc(Oc4cccc(C(F)(F)F)c4)c(Cl)c3)c21	8.02687
CHEMBL4439338	9.6	nM	COc1cc2ncnc(Nc3ccc(OCc4cccc(F)c4)c(Cl)c3)c2cc1OCCCN1CCNCCNCC1	8.01773
CHEMBL1256425	9.8	nM	CC(C)N1CCN([C@H]2CC[C@H](n3nc(-c4ccc(Nc5nc6cccc(Cl)c6o5)cc4)c4c(N)ncnc43)CC2)CC1	8.00877
CHEMBL3962365	10	nM	CCOc1cc2ncnc(Nc3ccc(OCc4cccc(F)c4)c(Cl)c3)c2cc1NC(=O)/C=C/CN1CCCC1	8
CHEMBL514436	10	nM	CS(=O)(=O)CCNCCCCOc1ccc2ncnc(Nc3ccc(OCc4cccc(F)c4)c(Cl)c3)c2c1	8
CHEMBL570760	10	nM	CN(C(=O)c1ccccc1)C1CN[C@H](C(=O)N2CC=C(c3ccccc3)CC2)[C@@H](C(=O)NO)C1	8
CHEMBL453376	10	nM	CS(=O)(=O)CCNCc1nc(-c2ccc3ncnc(Nc4ccc(OCc5cccc(F)c5)c(Cl)c4)c3c2)cs1	8
CHEMBL598799	10.1	nM	COc1cc2ncnc(Nc3ccc(OCc4cccc(F)c4)c(Cl)c3)c2cc1OCCCCCCC(=O)NO	7.99568
CHEMBL4783947	10.4	nM	O=C(CNCCO)Nc1ccc2ncnc(Nc3ccc(OCc4cccc(F)c4)c(Cl)c3)c2c1	7.98297
CHEMBL597551	10.6	nM	COc1cc2ncnc(Nc3ccc(F)c(Cl)c3)c2cc1OCCC(=O)NO	7.97469
CHEMBL3344220	10.6	nM	CS(=O)(=O)C[C@H](N)c1ccc(-c2ccc3ncnc(Nc4ccc(OCc5cccc(F)c5)c(Cl)c4)c3c2)o1	7.97469
CHEMBL5209046	10.77	nM	Cc1cc(Nc2c(C#N)cnc3ccc(NC(=O)/C=C/[C@H]4CCCN4C)cc23)ccc1Oc1cc2nncn2cn1	7.96778
CHEMBL4591886	10.94	nM	CCOCCOc1cc2ncnc(Nc3ccc(F)c(Cl)c3)c2cc1NC(=O)/C=C/CN(CC)CC	7.96098
CHEMBL2148053	11	nM	CC(C)(C(=O)NCCn1ccc2ncnc(Nc3ccc(Oc4cccc(Cl)c4)c(Cl)c3)c21)S(C)(=O)=O.Cc1ccc(S(=O)(=O)O)cc1	7.95861
CHEMBL1614726	11	nM	OCCOCCn1ccc2ncnc(Nc3cnc(Oc4cccc(C(F)(F)F)c4)c(Cl)c3)c21	7.95861
CHEMBL497804	11	nM	O[C@H]1CN[C@H](C#Cc2cc3ncnc(Nc4ccc(OCc5cccc(F)c5)c(Cl)c4)c3s2)C1	7.95861
CHEMBL1922900	11	nM	Clc1ccccc1Oc1ccc(Nc2ncnc3cc[nH]c23)cc1Cl	7.95861
CHEMBL2148046	11	nM	CC(C)S(=O)(=O)CC(=O)NCCn1ccc2ncnc(Nc3ccc(Oc4cccc(C(F)(F)F)c4)c(Cl)c3)c21	7.95861
CHEMBL4787483	11	nM	C=CC(=O)Nc1cccc(-c2c[nH]c3ncnc(Nc4ccc(OCc5ccccn5)c(Cl)c4)c23)c1	7.95861
CHEMBL1630109	11	nM	O=C(/C=C/c1cccc(-c2ccc3ncnc(Nc4ccc(OCc5cccc(F)c5)c(Cl)c4)c3c2)c1)NO	7.95861
CHEMBL2148052	11	nM	CC(C)(C(=O)NCCn1ccc2ncnc(Nc3ccc(Oc4cccc(Cl)c4)c(Cl)c3)c21)S(C)(=O)=O	7.95861
CHEMBL3890526	11	nM	COc1cc(Nc2ncnc3ccc(-c4ccc(CN5C[C@@H]6[C@@H](CO)[C@@H]6C5)cc4)cc23)ccc1Oc1ccccc1	7.95861
CHEMBL257872	11	nM	Cc1ccc(Oc2ccc(Nc3ncnc4[nH]nc(OCCN5CCC(O)CC5)c34)cc2C)cn1	7.95861
CHEMBL568346	11	nM	O=C(NO)[C@H]1C[C@H](OC(=O)N2CCCC2)CN[C@@H]1C(=O)N1CC=C(c2ccccc2)C1	7.95861
CHEMBL4795165	11	nM	C=CC(=O)Nc1cccc(-c2c[nH]c3ncnc(Nc4ccc(CN5C(=O)c6ccccc6C5=O)cc4)c23)c1	7.95861
CHEMBL3969056	11	nM	CN(C)C/C=C/C(=O)Nc1cc2c(Nc3ccc(Cc4ccccn4)cc3)ncnc2cn1	7.95861
CHEMBL1923004	11	nM	Cn1ccc2ncnc(Nc3ccc(Oc4cccc(C(F)(F)F)c4)c(Cl)c3)c21	7.95861
CHEMBL585299	11.5	nM	CN1C[C@@H](OC(=O)N2CCCC2)C[C@H](C(=O)NO)[C@H]1C(=O)N1CCN(c2ccccc2)CC1	7.9393
CHEMBL4782561	12	nM	O=C(Nc1ccc2ncnc(Nc3ccc(Oc4cccc(F)c4)c(Cl)c3)c2c1)c1ccc(CNCCO)cc1	7.92082
CHEMBL28418	12	nM	C=CC(=O)Nc1ccc2ncnc(Nc3ccc(F)c(Cl)c3)c2n1	7.92082
CHEMBL1630110	12	nM	O=C(/C=C/c1ccc(-c2ccc3ncnc(Nc4ccc(OCc5cccc(F)c5)c(Cl)c4)c3c2)cc1)NO	7.92082
CHEMBL404181	12	nM	C[C@H](Oc1cccc2ncnc(Nc3ccc4c(cnn4Cc4nccs4)c3)c12)C(=O)N1CCOCC1	7.92082
CHEMBL1923007	12	nM	OCCn1ccc2ncnc(Nc3ccc(Oc4cccc(C(F)(F)F)c4)c(Cl)c3)c21	7.92082
CHEMBL4643111	12	nM	CN1CCN(C/C=C/C(=O)N2CCOc3cc4ncnc(Nc5ccc(OCc6cccc(F)c6)c(Cl)c5)c4cc32)CC1	7.92082
CHEMBL2441563	12	nM	O=C(/C=C/CN1CCOCC1)N1CCOc2cc3ncnc(Nc4ccc(OCc5cccc(F)c5)c(Cl)c4)c3cc21	7.92082
CHEMBL381604	12	nM	Nc1nccc(C#Cc2cncnc2Nc2ccc(OCc3cccc(F)c3)c(Cl)c2)n1	7.92082
CHEMBL483321	12	nM	COCC(=O)NC/C=C/c1ccc2ncnc(Nc3ccc(Oc4ccc(C)nc4)c(C)c3)c2c1	7.92082
CHEMBL417478	12	nM	C=CC(=O)Nc1nc2c(Nc3ccc(F)c(Cl)c3)ncnc2cc1/C=C/CCN1CCOCC1	7.92082
CHEMBL4800516	12	nM	C=CC(=O)Nc1cccc(-c2c(-c3ccc(N4CCN(C)CC4)cc3)[nH]c3ncnc(Nc4ccc(OCN5C(=O)c6ccccc6C5=O)cc4)c23)c1	7.92082
CHEMBL3932176	12	nM	CCOc1cc2ncnc(Nc3ccc4c(cnn4Cc4ccccc4)c3)c2cc1NC(=O)/C=C/CN(C)C	7.92082
CHEMBL4778909	12	nM	C=CC(=O)Nc1cccc(-c2c[nH]c3ncnc(Nc4ccc5c(cnn5Cc5ccccc5)c4)c23)c1	7.92082
CHEMBL255871	12	nM	CO/N=C/c1c(N)ncnc1Nc1ccc2c(cnn2Cc2cccc(F)c2)c1	7.92082
CHEMBL1923017	12	nM	Cc1cc2ncnc(Nc3ccc(Oc4cccc(C(F)(F)F)c4)c(Cl)c3)c2n1CCOCCO	7.92082
CHEMBL1923016	12	nM	O=S(=O)(CCO)CCn1ccc2ncnc(Nc3ccc(Oc4cccc(C(F)(F)F)c4)c(Cl)c3)c21	7.92082
CHEMBL1923015	12	nM	[O-][S+](CCO)CCn1ccc2ncnc(Nc3ccc(Oc4cccc(C(F)(F)F)c4)c(Cl)c3)c21	7.92082
CHEMBL3814812	12.1	nM	Fc1cccc(COc2ccc(Nc3ncnc4ccc(NC(=S)NCCCN5CCOCC5)cc34)cc2Cl)c1	7.91721
CHEMBL3436356	12.3	nM	Cc1ccc(S(=O)(=O)O)cc1.Fc1cccc(COc2ccc(Nc3ncnc4ccc(-c5ccc(CN6CCNCC6)o5)cc34)cc2Cl)c1	7.91009
CHEMBL597752	12.4	nM	COc1cc2ncnc(Nc3ccc(F)c(Cl)c3)c2cc1OCCCC(=O)NO	7.90658
CHEMBL488350	13	nM	COC(=O)CNCc1ccc(-c2cc3c(Nc4ccc(OCc5ccccc5)cc4)ncnc3cn2)o1	7.88606
CHEMBL496174	13	nM	Fc1cccc(COc2ccc(Nc3ncnc4cc(C#C[C@H]5CCCN5)sc34)cc2Cl)c1	7.88606
CHEMBL4750655	13	nM	C=CC(=O)Nc1cccc(-c2c(-c3ccc(N4CCN(C)CC4)cc3)[nH]c3ncnc(Nc4ccc(OC(=O)C(c5ccccc5)N5Cc6ccccc6C5=O)cc4)c23)c1	7.88606
CHEMBL5286014	13	nM	C=CC(=O)N1CCC[C@H](n2nc(C(=O)c3ccc(CC(=O)N(C)C)c(C)c3C)c3c(N)ncnc32)C1	7.88606
CHEMBL4759697	13	nM	C=CC(=O)Nc1cc2c(Nc3cccc(Cl)c3F)ncnc2cc1OCc1cn(CCC(=O)NO)nn1	7.88606
CHEMBL367492	13	nM	CCOc1cc2ncc(C#N)c(Nc3ccc(Sc4nc(-c5ccccc5)cs4)c(Cl)c3)c2cc1NC(=O)/C=C/CN(C)C	7.88606
CHEMBL334801	13	nM	CN(C)CCCNC(=O)/C=C/C(=O)Nc1cc2c(Nc3cccc(Br)c3)ncnc2cn1	7.88606
CHEMBL1923000	13	nM	Fc1cccc(COc2ccc(Nc3ncnc4cc[nH]c34)cc2Cl)c1	7.88606
CHEMBL205798	13	nM	CC(=O)Nc1cccc(C#Cc2cncnc2Nc2ccc(OCc3cccc(F)c3)c(Cl)c2)c1	7.88606
CHEMBL3133816	13	nM	CC(=O)c1ccc2[nH]c3nccc(Nc4cccc(O)c4)c3c2c1	7.88606
CHEMBL4759178	13	nM	C=CC(=O)Nc1cccc(-c2c[nH]c3ncnc(Nc4ccc(Oc5ccccc5)cc4)c23)c1	7.88606
CHEMBL446250	13	nM	COc1ccccc1Cc1nc2ccc(-c3nn([C@H]4CC[C@H](N5CCN(CC6CC6)CC5)CC4)c4ncnc(N)c34)cc2[nH]1	7.88606
CHEMBL248114	13	nM	Cc1cncc(Cn2ncc3cc(Nc4ncnn5ccc(CN6CCC(N)CC6)c45)ccc32)c1	7.88606
CHEMBL204570	13	nM	OCc1cccc(C#Cc2cncnc2Nc2ccc(OCc3cccc(F)c3)c(Cl)c2)n1	7.88606
CHEMBL3436354	13.1	nM	Cc1ccc(S(=O)(=O)O)cc1.Fc1cccc(COc2ccc(Nc3ncnc4ccc(-c5ccc(CN6CCOCC6)o5)cc34)cc2Cl)c1	7.88273
CHEMBL1256431	13.8	nM	COCCCN1CCC(N2CCC(n3nc(-c4ccc(Nc5nc6cccc(Cl)c6o5)cc4)c4c(N)ncnc43)CC2)CC1	7.86012
CHEMBL1630114	14	nM	Nc1ccccc1NC(=O)/C=C/c1cccc(-c2ccc3ncnc(Nc4ccc(OCc5cccc(F)c5)c(Cl)c4)c3c2)c1	7.85387
CHEMBL4757450	14	nM	C=CC(=O)Nc1cccc(-c2c(-c3ccc(N4CCN(C)CC4)cc3)[nH]c3ncnc(Nc4ccc(OCc5ccccn5)c(Cl)c4)c23)c1	7.85387
CHEMBL2347958	14	nM	CN(C)C/C=C/C(=O)Nc1cc2c(Nc3ccc(F)c(Cl)c3)ncnc2cc1O[C@@H]1CCOC1	7.85387
CHEMBL514938	14	nM	Fc1cccc(COc2ccc(Nc3ncnc4sc(-c5ccco5)cc34)cc2Cl)c1	7.85387
CHEMBL1090358	14	nM	CCN1CCN(c2ccc(Nc3nccc(-c4c(-c5cccc(NC(=O)c6c(F)cccc6F)c5)nc5sccn45)n3)cc2)CC1	7.85387
CHEMBL4741898	14	nM	C=CC(=O)Nc1cccc(-c2c(-c3ccc(N4CCN(C)CC4)cc3)[nH]c3ncnc(OCC)c23)c1	7.85387
CHEMBL155761	14	nM	CS(=O)(=O)CCNc1nc(-c2ccc3ncnc(Nc4ccc(OCc5cccc(F)c5)c(Cl)c4)c3c2)cs1	7.85387
CHEMBL434827	14	nM	CCN(CC)CCCNC(=O)/C=C/C(=O)Nc1cc2c(Nc3cccc(Br)c3)ncnc2cn1	7.85387
CHEMBL329856	14	nM	CN(C)CC#CC(=O)Nc1ccc2ncnc(Nc3cccc(Br)c3)c2c1	7.85387
CHEMBL3930506	14	nM	O=C(/C=C/CN1CCCCC1)Nc1cc2c(Nc3ccc(F)c(Cl)c3)ncnc2cn1	7.85387
CHEMBL160846	14	nM	CS(=O)(=O)CCNc1nc(-c2ccc3ncnc(Nc4ccc(OCc5ccccc5)c(Cl)c4)c3c2)cs1	7.85387
CHEMBL4740834	14	nM	C=CC(=O)Nc1cccc(-c2c[nH]c3ncnc(Nc4ccc(OCc5cccc(F)c5)c(Cl)c4)c23)c1	7.85387
CHEMBL4751089	14	nM	C=CC(=O)Nc1cc(-c2c[nH]c3ncnc(Nc4ccc(OCc5ccccn5)c(Cl)c4)c23)ccc1OC(C)COC	7.85387
CHEMBL2148047	14	nM	CC(C)(C)S(=O)(=O)CC(=O)NCCn1ccc2ncnc(Nc3ccc(Oc4cccc(C(F)(F)F)c4)c(Cl)c3)c21	7.85387
CHEMBL4756368	14	nM	C=CC(=O)Nc1cc(-c2c[nH]c3ncnc(Nc4ccc5c(cnn5Cc5ccccc5)c4)c23)ccc1OCCO	7.85387
CHEMBL3436357	14.4	nM	CCOC(=O)N1CCN(Cc2ccc(-c3ccc4ncnc(Nc5ccc(OCc6cccc(F)c6)c(Cl)c5)c4c3)o2)CC1.Cc1ccc(S(=O)(=O)O)cc1	7.84164
CHEMBL1258231	14.5	nM	CN1CCC(N2CCC(n3nc(-c4ccc(Nc5nc6cccc(Cl)c6o5)cc4)c4c(N)ncnc43)CC2)CC1	7.83863
CHEMBL4783667	15	nM	C=CC(=O)Nc1cc(-c2c[nH]c3ncnc(Nc4ccc(CN5C(=O)c6ccccc6C5=O)cc4)c23)ccc1OCCO	7.82391
CHEMBL1923012	15	nM	OCCCCCn1ccc2ncnc(Nc3ccc(Oc4cccc(C(F)(F)F)c4)c(Cl)c3)c21	7.82391
CHEMBL596736	15	nM	COc1cc2ncnc(Nc3ccc(F)c(Cl)c3)c2cc1OCCCCC(=O)NO	7.82391
CHEMBL1923021	15	nM	CC(C)(O)C(=O)NCCn1ccc2ncnc(Nc3ccc(Oc4cccc(C(F)(F)F)c4)c(Cl)c3)c21	7.82391
CHEMBL4757145	15	nM	C=CC(=O)Nc1cc(-c2c[nH]c3ncnc(Nc4ccc(OCc5ccccn5)c(Cl)c4)c23)ccc1OCCN(C)C	7.82391
CHEMBL1630115	15	nM	Nc1ccccc1NC(=O)/C=C/c1ccc(-c2ccc3ncnc(Nc4ccc(OCc5cccc(F)c5)c(Cl)c4)c3c2)cc1	7.82391
CHEMBL1256430	15.1	nM	CC(C)N1CCC(N2CCC(n3nc(-c4ccc(Nc5nc6cccc(Cl)c6o5)cc4)c4c(N)ncnc43)CC2)CC1	7.82102
CHEMBL1256435	15.4	nM	CN1CCN([C@H]2CC[C@H](n3nc(-c4ccc(Nc5nc6cccc(Cl)c6o5)cc4Cl)c4c(N)ncnc43)CC2)CC1	7.81248
CHEMBL3344211	15.5	nM	CCNC(CS(C)(=O)=O)c1ccc(-c2ccc3ncnc(Nc4ccc(OCc5cccc(F)c5)c(Cl)c4)c3c2)o1	7.80967
CHEMBL569853	15.5	nM	CC(C)C(=O)N(C)C1CN[C@H](C(=O)N2CC=C(c3ccccc3)CC2)[C@@H](C(=O)NO)C1	7.80967
CHEMBL4637274	15.7	nM	C#Cc1cccc(Nc2cccc3cc(OC)c(OCCCCCCC(=O)NO)cc23)c1	7.8041
CHEMBL598797	15.7	nM	C#Cc1cccc(Nc2ncnc3cc(OC)c(OCCCCCCC(=O)NO)cc23)c1	7.8041
CHEMBL2437225	15.9	nM	CS(=O)(=O)NCCNCc1ccc(-c2ccc3ncnc(Nc4ccc(OCc5cccc(F)c5)c(Cl)c4)c3c2)o1.Cc1ccc(S(=O)(=O)O)cc1	7.7986
CHEMBL1922897	16	nM	Clc1cc(Nc2ncnc3cc[nH]c23)ccc1Oc1ccccc1	7.79588
CHEMBL233325	16	nM	O[C@H]1CNCCN(Cc2ccn3ncnc(Nc4ccc5c(cnn5Cc5cccc(F)c5)c4)c23)C1	7.79588
CHEMBL4783641	16	nM	C=CC(=O)Nc1cc2c(Nc3cccc(Cl)c3F)ncnc2cc1OCc1cn(CCCCC(=O)NO)nn1	7.79588
CHEMBL30432	16	nM	CN(C)c1cc2c(Nc3ccc4c(cnn4Cc4ccccc4)c3)ncnc2cn1	7.79588
CHEMBL94062	16	nM	O=C(C#CCO)Nc1ccc2ncnc(Nc3cccc(Br)c3)c2c1	7.79588
CHEMBL1256432	16	nM	CN1CCN([C@H]2CC[C@H](n3nc(-c4ccc(Nc5nc6cccc(Cl)c6o5)c(F)c4)c4c(N)ncnc43)CC2)CC1	7.79588
CHEMBL3633929	16	nM	CC(=O)Nc1ccc2ncnc(Nc3ccc(OCc4ccccn4)c(Cl)c3)c2c1	7.79588
CHEMBL461426	16	nM	NC(=O)O[C@H]1CN[C@H](C#Cc2cc3ncnc(Nc4ccc(OCc5cccc(F)c5)c(Cl)c4)c3s2)C1	7.79588
CHEMBL5202846	16.01	nM	Cc1cc(Nc2ncnc3cc(O)c(NC(=O)/C=C/[C@H]4CCCN4C)cc23)ccc1Oc1cnn2cnnc2c1	7.79561
CHEMBL3911796	16.4	nM	O=C(CCCCCCn1cc(-c2ccc3ncnc(Nc4ccc(OCc5cccc(F)c5)c(Cl)c4)c3c2)nn1)NO	7.78516
CHEMBL2148049	17	nM	CC(C)(C(=O)NCCn1ccc2ncnc(Nc3ccc(Oc4cccc(C(F)(F)F)c4)c(Cl)c3)c21)S(C)(=O)=O	7.76955
CHEMBL1923005	17	nM	Cn1ccc2ncnc(Nc3ccc(Oc4cccc(OC(F)(F)F)c4)c(Cl)c3)c21	7.76955
CHEMBL215171	17	nM	CS(=O)(=O)CCOCc1ccc(-c2ccc3ncnc(Nc4ccc(OCc5cccc(F)c5)c(Cl)c4)c3c2)o1	7.76955
CHEMBL3967962	17	nM	O=C(/C=C/CN1CCCC1)Nc1cc2c(Nc3ccc(Cc4ccccn4)cc3)ncnc2cn1	7.76955
CHEMBL401713	17	nM	COc1cc(Nc2ncnc3[nH]nc(OCCN4CCC(O)CC4)c23)ccc1OCc1ccccn1	7.76955
CHEMBL1614725	17	nM	CC(C)(O)CC(=O)NCCn1ccc2ncnc(Nc3ccc(Oc4cccc(C(F)(F)F)c4)c(Cl)c3)c21	7.76955
CHEMBL448628	17	nM	COc1ccccc1Cc1nc2ccc(-c3nn([C@H]4CC[C@H](N5CCN(C(=O)N(C)C)CC5)CC4)c4ncnc(N)c34)cc2[nH]1	7.76955
CHEMBL565467	18	nM	CCC1=C2C(Nc3ccc4c(cnn4Cc4ccccc4)c3)=NC=NC2N=C1NC(=O)O[C@H]1CC[C@H](N)CC1	7.74473
CHEMBL565714	18	nM	CCC1=C2C(Nc3ccc4c(cnn4Cc4ccccc4)c3)=NC=NC2N=C1NC(=O)OCCN1CCNCC1	7.74473
CHEMBL524457	18	nM	Nc1ncnc(Nc2ccc3c(cnn3Cc3cccc(F)c3)c2)c1/C=N/N1CCCCC1	7.74473
CHEMBL496628	18	nM	O=C(NO)[C@H]1C[C@@H](CC(=O)N2CCCCC2)CC[C@@H]1C(=O)N1CCN(c2ccccc2)CC1	7.74473
CHEMBL2348416	18	nM	COC(=O)C1=Cc2c(ncnc2Nc2ccc(Oc3cccc4sccc34)c(Cl)c2)NCC1	7.74473
CHEMBL248322	18	nM	NC1CCN(Cc2ccn3ncnc(Nc4ccc(OCc5cccc[n+]5[O-])c(Cl)c4)c23)CC1	7.74473
CHEMBL394057	18	nM	O=C(O)COCc1ccn2ncnc(Nc3ccc4c(cnn4Cc4cccc(F)c4)c3)c12	7.74473
CHEMBL256297	18	nM	CO/N=C/c1c(N)ncnc1Nc1ccc(OCc2cccc(F)c2)c(Cl)c1	7.74473
CHEMBL569880	18	nM	C=CC(=O)N1CCC[C@H]1C(=O)Nc1cc2c(Nc3ccc(F)c(Cl)c3F)ncnc2cc1OCCOC	7.74473
CHEMBL2048790	18	nM	O=C1NCc2cc(Oc3ccc(Nc4ncnc5ccn(CCO)c45)cc3Cl)ccc21	7.74473
CHEMBL1934623	18	nM	Cc1ncnc(Nc2ccc(OCc3cccc(F)c3)c(Cl)c2)c1C#Cc1ccc(CNC(C)C)cc1	7.74473
CHEMBL373532	18	nM	O=C(NO)[C@H]1CC2(CC2)CN[C@@H]1C(=O)N1CC=C(c2ccccc2)CC1	7.74473
CHEMBL228276	18	nM	Cc1cc(Nc2ncnc3cnc(N4CCOCC4)cc23)ccc1OC1CCN(C(=O)C2CCCC2)CC1	7.74473
CHEMBL230891	18	nM	COCC(=O)NCC#Cc1ccc2ncnc(Nc3ccc(Oc4cccc(C(=O)NC(C)(C)C)c4)c(C)c3)c2c1	7.74473
CHEMBL212954	18	nM	[O-][S+]1CCN(Cc2ccc(-c3ccc4ncnc(Nc5ccc(OCc6cccc(F)c6)c(Cl)c5)c4c3)o2)CC1	7.74473
CHEMBL2437223	18.3	nM	CSCCNCc1ccc(-c2ccc3ncnc(Nc4ccc(OCc5cccc(F)c5)c(Cl)c4)c3c2)o1.Cc1ccc(S(=O)(=O)O)cc1	7.73755
CHEMBL4290869	19	nM	CC(C)(O)CC(=O)NCCc1ccc2ncnc(Nc3ccc(Oc4cccc(C(F)(F)F)c4)c(Cl)c3)c2c1	7.72125
CHEMBL1923018	19	nM	N#Cc1cc2ncnc(Nc3ccc(Oc4cccc(C(F)(F)F)c4)c(Cl)c3)c2n1CCOCCO	7.72125
CHEMBL493428	19	nM	CS(=O)(=O)CCNCCCCOc1ccc2ncnc(Nc3ccc4c(cnn4Cc4cccc(F)c4)c3)c2c1	7.72125
CHEMBL3923228	19	nM	CCOc1cc2ncnc(Nc3ccc4c(cnn4Cc4ccccc4)c3)c2cc1NC(=O)/C=C/CN1CCCC1	7.72125
CHEMBL3942228	19	nM	CCOc1cc2ncnc(Nc3ccc4c(cnn4Cc4ccccc4)c3)c2cc1NC(=O)/C=C/CN1CCCCC1	7.72125
CHEMBL3941823	19	nM	CCOc1cc2ncnc(Nc3ccc4c(cnn4Cc4ccccc4)c3)c2cc1NC(=O)/C=C/CN1C[C@@H](C)N[C@@H](C)C1	7.72125
CHEMBL403785	19	nM	C[C@@H](COc1cccc2ncnc(Nc3ccc(OCc4ccccn4)c(Cl)c3)c12)N(C)C(=O)CO	7.72125
CHEMBL1683967	19	nM	Cc1ncnc(Nc2ccc(OCc3cccc(F)c3)c(Cl)c2)c1/C=C(\F)C(=O)NCCN1CCCC1	7.72125
CHEMBL2138625	19	nM	C=CC(=O)Nc1cc2c(Nc3ccc(F)c(Cl)c3)ncnc2cc1C#CC(C)(C)N1CCN(C)CC1	7.72125
CHEMBL477078	19	nM	O=C(O)CNCc1ccc(-c2cc3c(Nc4ccc(OCc5ccccc5)cc4)ncnc3cn2)o1	7.72125
CHEMBL231101	19	nM	COc1cc2ncnc(Nc3ccc(OC4CCN(C(=O)Nc5c(F)cccc5F)CC4)c(C)c3)c2cc1OC	7.72125
CHEMBL403774	19	nM	C[C@@H](Oc1cccc2ncnc(Nc3ccc(OCc4ccccn4)c(Cl)c3)c12)C(=O)N1CCOCC1	7.72125
CHEMBL3970330	19	nM	COCCOc1cc2ncnc(Nc3ccc4c(cnn4Cc4ccccc4)c3)c2cc1NC(=O)/C=C/CN1CCN(C)CC1	7.72125
CHEMBL598377	19	nM	COc1cc2ncnc(Nc3ccc(F)c(Cl)c3)c2cc1OCCCCCCC(=O)NO	7.72125
CHEMBL3290142	19	nM	C=CC(=O)Nc1cccc(Nc2ncc(NC(=O)c3cc(NC(=O)c4cccc(C(F)(F)F)c4)ccc3C)cn2)c1	7.72125
CHEMBL255376	19	nM	OC1CCN(CCOc2n[nH]c3ncnc(Nc4ccc(OCc5cccc(F)c5)c(Cl)c4)c23)CC1	7.72125
CHEMBL3814021	19.2	nM	O=C(NCCN1CCCCC1)Nc1ccc2ncnc(Nc3ccc(OCc4cccc(F)c4)c(Cl)c3)c2c1	7.7167
CHEMBL3436358	19.8	nM	CS(=O)(=O)N1CCN(Cc2ccc(-c3ccc4ncnc(Nc5ccc(OCc6cccc(F)c6)c(Cl)c5)c4c3)o2)CC1.Cc1ccc(S(=O)(=O)O)cc1	7.70333
CHEMBL466174	20	nM	CCNC(=O)O[C@H]1CN[C@@H](C#Cc2cc3ncnc(Nc4ccc(OCc5cccc(F)c5)c(Cl)c4)c3s2)C1	7.69897
CHEMBL1645469	20	nM	Cc1ccccc1Nc1ncnn2ccc(CN3CCC(N)CC3)c12	7.69897
CHEMBL212251	20	nM	CCCN(CCS(C)(=O)=O)Cc1ccc(-c2ccc3ncnc(Nc4ccc(OCc5cccc(F)c5)c(Cl)c4)c3c2)o1	7.69897
CHEMBL497863	20	nM	Nc1ncnc(Nc2ccc3c(cnn3Cc3cccc(F)c3)c2)c1/C=N/NCC(F)(F)F	7.69897
CHEMBL1645465	20	nM	C#Cc1cccc(Nc2ncnn3ccc(COC[C@@H]4CNCCO4)c23)c1	7.69897
CHEMBL499534	20	nM	O=C(O[C@H]1CN[C@H](C#Cc2cc3ncnc(Nc4ccc(OCc5cccc(F)c5)c(Cl)c4)c3s2)C1)N1CCNCC1	7.69897
CHEMBL598163	20	nM	COc1cc2ncnc(Nc3ccc(F)c(Cl)c3)c2cc1OCCCCCC(=O)NO	7.69897
CHEMBL466586	20	nM	CNC(=O)O[C@H]1CN[C@H](C#Cc2cc3ncnc(Nc4ccc(OCc5cccc(F)c5)c(Cl)c4)c3s2)C1	7.69897
CHEMBL3939985	20	nM	CCOc1cc2ncnc(Nc3ccc(OCc4cccc(F)c4)c(Cl)c3)c2cc1NC(=O)/C=C/CN1CCN(C)CC1	7.69897
CHEMBL1922899	20	nM	Fc1cccc(Oc2ccc(Nc3ncnc4cc[nH]c34)cc2Cl)c1	7.69897
CHEMBL567197	20	nM	CCC1=C2C(Nc3ccc4c(cnn4Cc4ccccc4)c3)=NC=NC2N=C1NC(=O)O[C@H]1CC[C@@](C)(N)CC1	7.69897
CHEMBL597773	20.1	nM	COc1cc2ncnc(Nc3ccc(F)c(Cl)c3)c2cc1NC(=O)CCCCCCC(=O)NO	7.6968
CHEMBL375671	21	nM	Cc1cc(Nc2ncnc3cnc(N4CCOCC4)cc23)ccc1Oc1ccc(C(=O)NCC(C)(C)C)cc1	7.67778
CHEMBL3409483	21	nM	[O-][S+]1CCN(Cc2ccc(-c3cc4c(Nc5ccc(OCc6cccc(F)c6)cc5)ncnc4cn3)o2)CC1	7.67778
CHEMBL5280584	21	nM	Cc1ccccc1NC(=O)CSc1nc2cc3ccccc3cc2c(=O)n1-c1ccc(S(N)(=O)=O)cc1	7.67778
CHEMBL4799276	21	nM	C=CC(=O)Nc1cccc(-c2c(-c3ccc(N4CCN(C)CC4)cc3)[nH]c3ncnc(OC(C)C)c23)c1	7.67778
CHEMBL398172	21	nM	Cc1cc(Nc2ncnc3cnc(N(C)C)cc23)ccc1OC1CCN(C(=O)Nc2c(F)cccc2F)CC1	7.67778
CHEMBL567873	21	nM	CCC1=C2C(Nc3ccc4c(cnn4Cc4ccccc4)c3)=NC=NC2N=C1NC(=O)OC[C@@H]1COCCN1	7.67778
CHEMBL3965948	21	nM	O=C(CBr)OCCn1c(=O)oc2cc3ncnc(Nc4ccc(N5CCOCC5)c(Cl)c4)c3cc21	7.67778
CHEMBL5277831	21	nM	Cc1ccc(NC(=O)CSc2nc3cc4ccccc4cc3c(=O)n2-c2ccc(S(N)(=O)=O)cc2)cc1	7.67778
CHEMBL1256427	21.5	nM	COCCCN1CCN([C@H]2CC[C@H](n3nc(-c4ccc(Nc5nc6cccc(Cl)c6o5)cc4)c4c(N)ncnc43)CC2)CC1	7.66756
CHEMBL1256429	21.5	nM	CN(C)C(=O)CN1CCN([C@H]2CC[C@H](n3nc(-c4ccc(Nc5nc6cccc(Cl)c6o5)cc4)c4c(N)ncnc43)CC2)CC1	7.66756
CHEMBL439425	22	nM	C[C@@H](Oc1cccc2ncnc(Nc3ccc4c(cnn4Cc4cccc(F)c4)c3)c12)C(=O)N1CCOCC1	7.65758
CHEMBL248116	22	nM	NC1CCN(Cc2ccn3ncnc(Nc4ccc(OCc5ccccn5)c(Cl)c4)c23)CC1	7.65758
CHEMBL3901296	22	nM	CN(C)C/C=C/C(=O)Nc1cc2c(Nc3ccc(F)c(Cl)c3)ncnc2cc1OC[C@@]12COC[C@@H]1C2	7.65758
CHEMBL1645462	22	nM	Cc1c(NC(=O)OC[C@@H]2COCCN2)cn2ncnc(Nc3ccc4c(cnn4Cc4cccc(F)c4)c3)c12	7.65758
CHEMBL583403	22	nM	CCC1=C2C(Nc3ccc4c(cnn4Cc4cccc(F)c4)c3)=NC=NC2N=C1NC(=O)OC[C@@H]1COCCN1	7.65758
CHEMBL402507	22	nM	Cc1ccc(Oc2ccc(Nc3ncnc4cccc(O[C@H](C)C(=O)N5CCOCC5)c34)cc2C)cn1	7.65758
CHEMBL380247	22	nM	CS(=O)(=O)CCNCc1ccc(-c2ccc3ncnc(Nc4ccc(OCc5ccccc5)c(Cl)c4)c3c2)o1	7.65758
CHEMBL31815	22	nM	C=CC(=O)Nc1ccc2ncnc(Nc3cccc(C)c3)c2c1	7.65758
CHEMBL1923001	22	nM	Clc1cc(Nc2ncnc3cc[nH]c23)ccc1OCc1ccccn1	7.65758
CHEMBL413987	22	nM	C[C@@H](CN(C)C(=O)CO)Oc1cccc2ncnc(Nc3ccc(OCc4ccccn4)c(Cl)c3)c12	7.65758
CHEMBL384407	22	nM	CS(=O)(=O)CCN(CC#N)Cc1ccc(-c2ccc3ncnc(Nc4ccc(OCc5cccc(F)c5)c(Cl)c4)c3c2)o1	7.65758
CHEMBL402113	22	nM	CO/N=C/c1c(N)ncnc1Nc1ccc2c(cnn2Cc2ccccc2)c1	7.65758
CHEMBL2035810	22.4	nM	C=CC(=O)NCc1coc(-c2c(N)ncnc2Nc2ccc(OCc3ccccn3)c(Cl)c2)n1	7.64975
CHEMBL256362	23	nM	Cc1ccc(Oc2ccc(Nc3ncnc4cccc(O[C@H](C)C(=O)N(C)C)c34)cc2C)cn1	7.63827
CHEMBL4110258	23	nM	CN(C)CC/C=C/C(=O)Nc1cc2c(Nc3ccc(F)c(Cl)c3)ncnc2cc1OC[C@]12COC[C@H]1C2	7.63827
CHEMBL4751894	23	nM	C=CC(=O)Nc1cc(-c2c[nH]c3ncnc(Nc4ccc(CN5C(=O)c6ccccc6C5=O)cc4)c23)ccc1OCCN(C)C	7.63827
CHEMBL583218	23	nM	CCC1=C2C(Nc3ccc4c(cnn4Cc4ccccc4)c3)=NC=NC2N=C1NC(=O)OCC1CCNCC1	7.63827
CHEMBL248108	23	nM	NC1CCN(Cc2ccn3ncnc(Nc4ccc5c(cnn5Cc5cccc(F)c5)c4)c23)CC1	7.63827
CHEMBL3921129	23	nM	CCOc1cc2ncnc(Nc3ccc4c(cnn4Cc4ccccc4)c3)c2cc1NC(=O)/C=C/CN1CCN(C)CC1	7.63827
CHEMBL212965	23	nM	[O-][S+]1CCN(Cc2ccc(-c3ccc4ncnc(Nc5ccc(OCc6ccccc6)c(Cl)c5)c4c3)o2)CC1	7.63827
CHEMBL411192	23	nM	Cc1cc(Nc2ncnc3cnc(N4CCOCC4)cc23)ccc1OC1CCN(C(=O)CC(C)(C)C)CC1	7.63827
CHEMBL411799	23	nM	COc1cc(Nc2ncnc3cccc(O[C@H](C)C(=O)N4CCOCC4)c23)ccc1Oc1ccc(C)nc1	7.63827
CHEMBL4211949	23.2	nM	C=CC(=O)N[C@@H]1Cn2c(c(-c3ccc(Oc4ccccc4)cc3)c3c(N)ncnc32)C1=C	7.63451
CHEMBL3436355	23.7	nM	CN1CCN(Cc2ccc(-c3ccc4ncnc(Nc5ccc(OCc6cccc(F)c6)c(Cl)c5)c4c3)o2)CC1.Cc1ccc(S(=O)(=O)O)cc1	7.62525
CHEMBL214487	24	nM	CC(C)S(=O)(=O)CCNCc1ccc(-c2ccc3ncnc(Nc4ccc(OCc5cccc(F)c5)c(Cl)c4)c3c2)o1	7.61979
CHEMBL301018	24	nM	COc1cc2ncnc(Nc3ccc(F)c(Cl)c3)c2cc1OC	7.61979
CHEMBL194389	24	nM	COc1cccc2ncnc(Nc3ccc(OCc4ccccn4)c(Cl)c3)c12	7.61979
CHEMBL257198	24	nM	C[C@H](Oc1cccc2ncnc(Nc3ccc4c(cnn4Cc4nccs4)c3)c12)C(=O)N(C)C	7.61979
CHEMBL138940	24	nM	O=C(/C=C/C(=O)Nc1cc2c(Nc3ccc(F)c(Cl)c3)ncnc2cn1)NCCCN1CCOCC1	7.61979
CHEMBL597569	24	nM	COCCOc1cc2ncnc(Nc3ccc(F)c(Cl)c3)c2cc1OCCCCCCC(=O)NO	7.61979
CHEMBL193578	24	nM	Clc1cc(Nc2ncnc3cccc(OC4CCOCC4)c23)ccc1OCc1ccccn1	7.61979
CHEMBL2348417	24	nM	O=C(NCCO)C1=Cc2c(ncnc2Nc2ccc(Oc3cccc4sccc34)c(Cl)c2)NCC1	7.61979
CHEMBL596754	24.2	nM	COc1cc2ncnc(Nc3ccc(F)c(Cl)c3)c2cc1SCCCCCCC(=O)NO	7.61618
CHEMBL402293	25	nM	CC(C)O/N=C/c1c(N)ncnc1Nc1ccc2c(cnn2Cc2cccc(F)c2)c1	7.60206
CHEMBL4112924	25	nM	CO[C@@H]1COC2C1OC[C@H]2Oc1cc2ncnc(Nc3ccc(F)c(Cl)c3)c2cc1NC(=O)/C=C/CN(C)C	7.60206
CHEMBL214689	25	nM	CS(=O)(=O)CCNCc1ccc(-c2ccc3ncnc(Nc4ccc(OCc5ccccc5)c(Br)c4)c3c2)o1	7.60206
CHEMBL231302	25	nM	CNc1cc2c(Nc3ccc(OC4CCN(C(=O)Nc5c(F)cccc5F)CC4)c(C)c3)ncnc2cn1	7.60206
CHEMBL213342	26	nM	CS(=O)(=O)CCNCc1ccc(-c2ccc3ncnc(Nc4ccc(OCc5ccccc5)cc4)c3c2)o1	7.58503
CHEMBL4753389	26	nM	C=CC(=O)Nc1cccc(-c2c(-c3ccc(N4CCN(C)CC4)cc3)[nH]c3ncnc(OCC(C)C)c23)c1	7.58503
CHEMBL53665	26	nM	C=CC(=O)Nc1ccc2ncnc(Nc3ccc(F)c(Br)c3)c2n1	7.58503
CHEMBL383965	26	nM	CCCS(=O)(=O)CCNCc1ccc(-c2ccc3ncnc(Nc4ccc(OCc5cccc(F)c5)c(Cl)c4)c3c2)o1	7.58503
CHEMBL1921813	26	nM	COc1cccc(Oc2ccc(Nc3ncnc4cc[nH]c34)cc2Cl)c1	7.58503
CHEMBL265367	26	nM	Cn1ccnc1S(=O)(=O)CCNCc1ccc(-c2ccc3ncnc(Nc4ccc(OCc5cccc(F)c5)c(C(F)(F)F)c4)c3c2)o1	7.58503
CHEMBL257197	26	nM	C[C@@H](Oc1cccc2ncnc(Nc3ccc4c(cnn4Cc4nccs4)c3)c12)C(=O)N(C)C	7.58503
CHEMBL248321	26	nM	NC1CCN(Cc2ccn3ncnc(Nc4ccc(OCc5cnccn5)c(Cl)c4)c23)CC1	7.58503
CHEMBL3409484	26	nM	CS(=O)(=O)CCNCc1ccc(-c2cc3c(Nc4ccc(OCc5ccccc5)cc4)ncnc3cn2)o1	7.58503
CHEMBL4743066	26	nM	C=CC(=O)Nc1cccc(-c2c[nH]c3ncnc(Nc4ccc(OC(c5ccccc5)c5ccccc5)cc4)c23)c1	7.58503
CHEMBL202556	26	nM	O=C(C#CCN1CCOCC1)Nc1cc2c(Nc3ccc(F)c(Cl)c3)ncnc2cn1	7.58503
CHEMBL3344221	26.1	nM	CN(C)[C@@H](CS(C)(=O)=O)c1ccc(-c2ccc3ncnc(Nc4ccc(OCc5cccc(F)c5)c(Cl)c4)c3c2)o1	7.58336
CHEMBL392273	27	nM	Fc1cccc(Cn2ncc3cc(Nc4ncnn5ccc(CN6CCCNCC6)c45)ccc32)c1	7.56864
CHEMBL402798	27	nM	Cc1ccc(Oc2ccc(Nc3ncnc4cccc(O[C@H](C)C(=O)N5CCOCC5)c34)cc2Cl)cn1	7.56864
CHEMBL3907533	27	nM	CCOc1cc2ncnc(Nc3ccc4c(cnn4Cc4ccccc4)c3)c2cc1NC(=O)/C=C/CN1CCOCC1	7.56864
CHEMBL231205	27	nM	COCCOc1ccc2ncnc(Nc3ccc(OC4CCN(C(=O)Nc5c(F)cccc5F)CC4)c(C)c3)c2c1	7.56864
CHEMBL257816	27	nM	CO/N=C/c1c(N)ncnc1Nc1ccc2c(ccn2Cc2cccc(F)c2)c1	7.56864
CHEMBL572045	27.5	nM	CN1C[C@@H](OC(=O)N2CCCCCCC2)C[C@H](C(=O)NO)[C@H]1C(=O)N1CCN(c2ccccc2)CC1	7.56067
CHEMBL605976	27.8	nM	COc1cc2ncnc(N[C@H](C)c3ccccc3)c2cc1OCCCCCCC(=O)NO	7.55596
CHEMBL160303	28	nM	CS(=O)(=O)CCNc1nc(-c2ccc3ncnc(Nc4ccc5c(cnn5Cc5ccccc5)c4)c3c2)cs1	7.55284
CHEMBL2048791	28	nM	O=C1Cc2cc(Oc3ccc(Nc4ncnc5ccn(CCO)c45)cc3Cl)ccc2N1	7.55284
CHEMBL495596	28	nM	O=C(NO)[C@H]1CC(CC(=O)N2CCCC2)CN[C@@H]1C(=O)N1CCN(c2ccccc2)CC1	7.55284
CHEMBL1204013	28	nM	Cl.O=C(NO)[C@H]1CC(OC(=O)N2CCCC2)CN[C@@H]1C(=O)N1CC[C@H](c2ccccc2)C1	7.55284
CHEMBL212250	28	nM	O=S(=O)(CCOCc1ccc(-c2ccc3ncnc(Nc4ccc(OCc5cccc(F)c5)c(Cl)c4)c3c2)o1)c1ccccc1	7.55284
CHEMBL566350	28	nM	CCC1=C2C(Nc3ccc4c(cnn4Cc4ccccc4)c3)=NC=NC2N=C1NC(=O)OCCN1CCCCC1	7.55284
CHEMBL2348414	29	nM	O=C(NCCO)C1=Cc2c(ncnc2Nc2ccc(Oc3cccc(C(F)(F)F)c3)c(Cl)c2)NCC1	7.5376
CHEMBL584714	29	nM	CCC1=C2C(Nc3ccc4c(cnn4Cc4ccccc4)c3)=NC=NC2N=C1NC(=O)OCC1CCCNC1	7.5376
CHEMBL584960	29	nM	CN(C(=O)c1ccccc1)C1CN[C@H](C(=O)N2CC[C@H](c3ccccc3)C2)[C@@H](C(=O)NO)C1	7.5376
CHEMBL4763834	29	nM	C=CC(=O)Nc1cccc(-c2c[nH]c3ncnc(Nc4ccc(Cc5ccccc5)cc4)c23)c1	7.5376
CHEMBL3133833	29	nM	Oc1cccc(Nc2ccnc3[nH]c4ccc(Br)cc4c23)c1	7.5376
CHEMBL1923008	29	nM	OCCn1ccc2ncnc(Nc3ccc(Oc4cccc(OC(F)(F)F)c4)c(Cl)c3)c21	7.5376
CHEMBL1928947	29	nM	C=CC(=O)Nc1cccc(Oc2cc(Nc3ccc(OCc4cccc(F)c4)c(Cl)c3)ncn2)c1	7.5376
CHEMBL1256433	29	nM	CN1CCN([C@H]2CC[C@H](n3nc(-c4ccc(Nc5nc6cccc(Cl)c6o5)c(Cl)c4)c4c(N)ncnc43)CC2)CC1	7.5376
CHEMBL206782	29	nM	COC(=O)CCCC(=O)Nc1cccc(C#Cc2cncnc2Nc2ccc(OCc3cccc(F)c3)c(Cl)c2)c1	7.5376
CHEMBL255656	30	nM	CO/N=C/c1c(N)ncnc1Nc1ccc2c(cnn2Cc2cccc(Cl)c2)c1	7.52288
CHEMBL3890751	30	nM	CCOc1cc2ncnc(Nc3ccc4c(ccn4S(=O)(=O)c4ccccc4)c3)c2cc1NC(=O)/C=C/CN1CCCC1	7.52288
CHEMBL585304	30	nM	O=C(NO)[C@H]1C[C@@H](OC(=O)N2CCCC2)CN[C@@H]1C(=O)N1CC=C(c2ccccc2)CC1	7.52288
CHEMBL214023	30	nM	O=S(=O)(CCNCc1ccc(-c2ccc3ncnc(Nc4ccc(OCc5cccc(F)c5)c(C(F)(F)F)c4)c3c2)o1)c1ccccn1	7.52288
CHEMBL228925	30	nM	CNc1cc2c(Nc3ccc(Oc4ccc(C(=O)NCC(C)(C)C)cc4)c(C)c3)ncnc2cn1	7.52288
CHEMBL3409482	30	nM	CN(CCO)c1cc2c(Nc3ccc4c(cnn4Cc4ccccc4)c3)ncnc2cn1	7.52288
CHEMBL5189852	30	nM	FC(F)(F)c1ccc(/C=C/c2nc(CNc3ccc(Br)cc3)co2)cc1	7.52288
CHEMBL3950966	30	nM	CCOc1cc2ncnc(Nc3ccc4c(cnn4Cc4ccccc4)c3)c2cc1NC(=O)/C=C/CN(C(C)C)C(C)C	7.52288
CHEMBL510845	30	nM	O=C(O[C@H]1CN[C@H](C#Cc2cc3ncnc(Nc4ccc5c(cnn5Cc5cccc(F)c5)c4)c3s2)C1)N1CCOCC1	7.52288
CHEMBL566559	30	nM	CCC1=C2C(Nc3ccc4c(cnn4Cc4ccccc4)c3)=NC=NC2N=C1NC(=O)OCC1CCCCN1	7.52288
CHEMBL1794063	30	nM	O=S(=O)(CCNCc1ccc(-c2ccc3ncnc(Nc4ccc(OCc5cccc(F)c5)c(Cl)c4)c3c2)o1)c1ccccc1	7.52288
CHEMBL2348418	30	nM	CS(=O)(=O)CCNC(=O)C1=Cc2c(ncnc2Nc2ccc(Oc3cccc4sccc34)c(Cl)c2)NCC1	7.52288
CHEMBL1922905	30	nM	FC(F)(F)c1cccc(Oc2ccc(Nc3ncnc4cc[nH]c34)cc2Cl)c1	7.52288
CHEMBL193681	30	nM	CCc1c(C(=O)NCCCn2ccnc2)cn2ncnc(Nc3ccc4c(cnn4Cc4ccccc4)c3)c12	7.52288
CHEMBL3233785	30	nM	O=C(/C=C/CN1CC2CCC1C(=O)C2)Nc1cc2c(Nc3ccc(F)c(Cl)c3)ncnc2s1	7.52288
CHEMBL429760	30	nM	Cc1ccc(Oc2ccc(Nc3ncnc4cccc(O[C@@H](C)C(=O)N(C)C)c34)cc2C)cn1	7.52288
CHEMBL504117	30	nM	O=C(O[C@H]1CN[C@H](C#Cc2cc3ncnc(Nc4ccc(OCc5ccccn5)c(Cl)c4)c3s2)C1)N1CCOCC1	7.52288
CHEMBL1934632	30	nM	Cc1ncnc(Nc2ccc(OCc3cccc(F)c3)c(Cl)c2)c1/C=C/c1ccc(CNC(C)C)cc1	7.52288
CHEMBL213818	31	nM	CS(=O)(=O)CCNCc1ccc(-c2ccc3ncnc(Nc4ccc(OCc5cccc(F)c5)cc4)c3c2)o1	7.50864
CHEMBL474431	31	nM	CS(=O)(=O)CCNCc1cc(-c2cc3ncnc(Nc4ccc(OCc5cccc(F)c5)c(Cl)c4)c3s2)cs1	7.50864
CHEMBL247104	31	nM	OCCNC1CCN(Cc2ccn3ncnc(Nc4ccc5c(cnn5Cc5cccc(F)c5)c4)c23)CC1	7.50864
CHEMBL258313	31	nM	C[C@@H](Oc1cccc2ncnc(Nc3ccc(OCc4ccccn4)c(Cl)c3)c12)C(=O)N(C)CCO	7.50864
CHEMBL567940	31	nM	CN(C)C(=O)O[C@H]1C[C@H](C(=O)NO)[C@@H](C(=O)N2CCN(c3ccccc3)CC2)N(C)C1	7.50864
CHEMBL109480	31	nM	C=CCNC1=C2C[C@@H](C)C[C@H](OC)[C@H](O)[C@@H](C)/C=C(\C)[C@H](OC(N)=O)[C@@H](OC)/C=C\C=C(/C)C(=O)NC(=CC1=O)C2=O	7.50864
CHEMBL461869	32	nM	CCNC(=O)O[C@@H]1CN[C@@H](C#Cc2cc3ncnc(Nc4ccc(OCc5cccc(F)c5)c(Cl)c4)c3s2)C1	7.49485
CHEMBL450109	32	nM	O=C(O[C@@H]1CN[C@@H](C#Cc2cc3ncnc(Nc4ccc(OCc5cccc(F)c5)c(Cl)c4)c3s2)C1)N1CCOCC1	7.49485
CHEMBL3950549	32	nM	COc1cc2ncnc(Nc3ccc(F)c(Cl)c3)c2cc1NC(=O)/C=C/CN(C(C)C)C(C)C	7.49485
CHEMBL247710	32	nM	NC1CCN(Cc2ccn3ncnc(Nc4ccc(OCc5cccc(F)c5)c(Cl)c4)c23)CC1	7.49485
CHEMBL504034	32	nM	CS(=O)(=O)CCNC(=O)O[C@H]1CN[C@H](C#Cc2cc3ncnc(Nc4ccc(OCc5cccc(F)c5)c(Cl)c4)c3s2)C1	7.49485
CHEMBL451513	32	nM	O=C(O[C@H]1CN[C@H](C#Cc2cc3ncnc(Nc4ccc(OCc5cccc(F)c5)c(Cl)c4)c3s2)C1)N1CCCC1	7.49485
CHEMBL596087	32	nM	COc1cc2c(Nc3ccc(-c4nc5ccccc5s4)c(C)c3)ncnc2cc1OCCCN1CCN(C)CC1	7.49485
CHEMBL256363	32	nM	C[C@@H](Oc1cccc2ncnc(Nc3ccc4c(cnn4Cc4ccccn4)c3)c12)C(N)=O	7.49485
CHEMBL517585	32	nM	CCN(C)C(=O)O[C@H]1CN[C@H](C#Cc2cc3ncnc(Nc4ccc(OCc5cccc(F)c5)c(Cl)c4)c3s2)C1	7.49485
CHEMBL381080	32	nM	CS(=O)(=O)CCC(=O)Nc1cccc(C#Cc2cncnc2Nc2ccc(OCc3cccc(F)c3)c(Cl)c2)c1	7.49485
CHEMBL207410	32	nM	CNC(=O)c1cccc(C#Cc2cncnc2Nc2ccc(OCc3cccc(F)c3)c(Cl)c2)c1	7.49485
CHEMBL3814846	32.3	nM	CC(=O)Nc1ccc2ncnc(Nc3ccc(OCc4cccc(F)c4)c(Cl)c3)c2c1	7.4908
CHEMBL3897363	33	nM	CN1CCN(c2ccc(Nc3ncnc4cc5oc(=O)n(CCOC(=O)CBr)c5cc34)cc2Cl)CC1	7.48149
CHEMBL91009	33	nM	COCC#CC(=O)Nc1ccc2ncnc(Nc3cccc(Br)c3)c2c1	7.48149
CHEMBL3813728	33.1	nM	Fc1cccc(COc2ccc(Nc3ncnc4ccc(NC(=S)NCCN5CCOCC5)cc34)cc2Cl)c1	7.48017
CHEMBL247915	34	nM	NC1CCN(Cc2ccn3ncnc(Nc4ccc5c(cnn5Cc5cccnc5)c4)c23)CC1	7.46852
CHEMBL428777	34	nM	C[C@@H](Oc1cccc2ncnc(Nc3ccc(OCc4ccccn4)c(Cl)c3)c12)C(=O)N(C)C	7.46852
CHEMBL1645475	34	nM	NC1CCN(Cc2ccn3ncnc(Nc4cc(Cl)cc(Cl)c4)c23)CC1	7.46852
CHEMBL3958006	35	nM	O=C(/C=C/CN1CCOCC1)Nc1cc2c(Nc3ccc(F)c(Cl)c3)ncnc2cn1	7.45593
CHEMBL500072	35	nM	O=C(O[C@H]1CN[C@H](C#Cc2cc3ncnc(Nc4ccc5c(cnn5Cc5cc(F)ccc5F)c4)c3s2)C1)N1CCOCC1	7.45593
CHEMBL3982289	35	nM	O=C(CCl)OCCn1c(=O)oc2cc3ncnc(Nc4ccc(N5CCOCC5)c(Cl)c4)c3cc21	7.45593
CHEMBL1093815	35	nM	O=C(Nc1cccc(-c2nc3sccn3c2-c2ccnc(Nc3ccccc3)n2)c1)c1ccccc1Cl	7.45593
CHEMBL430407	35	nM	Cc1ccc(Oc2ccc(Nc3ncnc4cccc(O[C@@H](C)C(=O)N5CCOCC5)c34)cc2C)cn1	7.45593
CHEMBL215716	35	nM	[O-][S+]1CCN(Cc2ccc(-c3ccc4ncnc(Nc5ccc(OCc6ccccc6)c(F)c5)c4c3)o2)CC1	7.45593
CHEMBL247914	35	nM	NC1CCN(Cc2ccn3ncnc(Nc4ccc5c(cnn5Cc5ccccn5)c4)c23)CC1	7.45593
CHEMBL228976	36	nM	Cc1cc(Nc2ncnc3cnc(N4CCCC4)cc23)ccc1Oc1ccc(C(=O)NCC(C)(C)C)cc1	7.4437
CHEMBL1683974	36	nM	CCN1CCN(CCCC#Cc2c(C)ncnc2Nc2ccc(OCc3cccc(F)c3)c(Cl)c2)CC1	7.4437
CHEMBL391387	36	nM	NC1CCN(Cc2ccn3ncnc(Nc4ccc(OCc5cccnc5)c(Cl)c4)c23)CC1	7.4437
CHEMBL205966	36	nM	Nc1ccc(C#Cc2cncnc2Nc2ccc(OCc3cccc(F)c3)c(Cl)c2)cc1	7.4437
CHEMBL4473365	37	nM	C=CC(=O)Nc1cc(Nc2ncc(Cl)c(Nc3ccccc3S(=O)(=O)C(C)C)n2)c(OC)cc1N(C)CCN(C)C	7.4318
CHEMBL578044	37	nM	CCC1=C2C(Nc3ccc4c(cnn4Cc4ccccc4)c3)=NC=NC2N=C1NC(=O)OCCC1CCNCC1	7.4318
CHEMBL495734	38	nM	CC(=O)N1CCC[C@@H]1C#Cc1cc2ncnc(Nc3ccc(OCc4cccc(F)c4)c(Cl)c3)c2s1	7.42022
CHEMBL212201	38	nM	O=S(=O)(CCCCNCc1ccc(-c2ccc3ncnc(Nc4ccc(OCc5ccccc5)c(Cl)c4)c3c2)o1)c1ccccc1	7.42022
CHEMBL1928950	38	nM	N#CCC(=O)Nc1cccc(Oc2cc(Nc3ccc(OCc4cccc(F)c4)c(Cl)c3)ncn2)c1	7.42022
CHEMBL3899132	38	nM	CCOc1cc2ncnc(Nc3ccc4c(ccn4S(=O)(=O)c4ccccc4)c3)c2cc1NC(=O)/C=C/CN(C)C	7.42022
CHEMBL593274	38	nM	COc1cc2c(Nc3ccc(-c4nc5ccccc5s4)c(Cl)c3)ncnc2cc1OCCCN1CCN(C)CC1	7.42022
CHEMBL391778	38	nM	NCC1CCN(Cc2ccn3ncnc(Nc4ccc5c(cnn5Cc5cccc(F)c5)c4)c23)CC1	7.42022
CHEMBL328704	38	nM	CCN(CC)CC#CC(=O)Nc1ccc2ncnc(Nc3cccc(Br)c3)c2c1	7.42022
CHEMBL206003	38	nM	NCc1cccc(C#Cc2cncnc2Nc2ccc(OCc3cccc(F)c3)c(Cl)c2)n1	7.42022
CHEMBL598164	38.2	nM	C#Cc1cccc(Nc2ncnc3cc(OC)c(OCCCCCC(=O)NO)cc23)c1	7.41794
CHEMBL599398	38.4	nM	C#Cc1cccc(Nc2ncnc3cc(OC)c(OCCCCC(=O)NO)cc23)c1	7.41567
CHEMBL3217993	39	nM	Nc1ccccc1NC(=O)c1ccc(COc2ccc3ncnc(Nc4cccc(Br)c4)c3c2)cc1	7.40894
CHEMBL234580	39	nM	O=C1CNCCN(Cc2ccn3ncnc(Nc4ccc5c(cnn5Cc5cccc(F)c5)c4)c23)C1	7.40894
CHEMBL456758	39	nM	COC[C@@H]1CCCN1/N=C/c1c(N)ncnc1Nc1ccc2c(cnn2Cc2cccc(F)c2)c1	7.40894
CHEMBL4474073	39.26	nM	COCCCOc1cc2ncnc(Nc3ccc(F)c(Cl)c3)c2cc1NC(=O)/C=C/CN(C)C	7.40605
CHEMBL196438	40	nM	CCc1c(C(=O)O)cn2ncnc(Nc3ccc4c(cnn4Cc4ccccc4)c3)c12	7.39794
CHEMBL447365	40	nM	O=C(O[C@@H]1CN[C@H](C#Cc2cc3ncnc(Nc4ccc(OCc5cccc(F)c5)c(Cl)c4)c3s2)C1)N1CCOCC1	7.39794
CHEMBL466412	40	nM	CN(C)C(=O)O[C@@H]1CN[C@@H](C#Cc2cc3ncnc(Nc4ccc(OCc5cccc(F)c5)c(Cl)c4)c3s2)C1	7.39794
CHEMBL412367	40	nM	CCc1c(NC(=O)OCCn2ccnc2)cn2ncnc(Nc3ccc4c(cnn4Cc4ccccc4)c3)c12	7.39794
CHEMBL3233767	40	nM	C=CC(=O)Nc1cc2c(Nc3ccc(F)c(Cl)c3)ncnc2s1	7.39794
CHEMBL500115	40	nM	CS(=O)(=O)O[C@H]1CN[C@H](C#Cc2cc3ncnc(Nc4ccc(OCc5cccc(F)c5)c(Cl)c4)c3s2)C1	7.39794
CHEMBL3814940	40.6	nM	Fc1cccc(COc2ccc(Nc3ncnc4ccc(NC(=S)NCCN5CCCCC5)cc34)cc2Cl)c1	7.39147
CHEMBL1934624	41	nM	Cc1ncnc(Nc2ccc(OCc3cccc(F)c3)c(Cl)c2)c1C#Cc1ccc(CN2CCCC2)cc1	7.38722
CHEMBL247709	41	nM	Fc1cccc(COc2ccc(Nc3ncnn4ccc(CN5CCCNCC5)c34)cc2Cl)c1	7.38722
CHEMBL4755977	41	nM	COc1cc2nccc(Oc3ccc(C(=O)Nc4ccccn4)cc3)c2cc1NC(=O)C#CCCN1CCOCC1	7.38722
CHEMBL1922998	41	nM	FC(F)(F)Oc1cccc(Oc2ccc(Nc3ncnc4cc[nH]c34)cc2Cl)c1	7.38722
CHEMBL1934625	41	nM	Cc1ncnc(Nc2ccc(OCc3cccc(F)c3)c(Cl)c2)c1C#Cc1ccc(CN(C)C)cc1	7.38722
CHEMBL245278	41	nM	C[C@H](c1cccc(F)c1)n1ncc2cc(Nc3ncnn4ccc(COC[C@@H]5CNCCO5)c34)ccc21	7.38722
CHEMBL584120	42	nM	O=C(NO)[C@H]1C[C@H](OC(=O)N2CCCC2)CN[C@@H]1C(=O)N1CCC(c2ccccc2)CC1	7.37675
CHEMBL571040	42	nM	C=CC(=O)N1CCC[C@H]1C(=O)Nc1cc2c(Nc3cccc(Cl)c3F)ncnc2cc1OCCOC	7.37675
CHEMBL256295	42	nM	Nc1ncnc(Nc2ccc3c(cnn3Cc3cccc(F)c3)c2)c1/C=N/O	7.37675
CHEMBL5281270	42	nM	CCc1cccc(NC(=O)CSc2nc3cc4ccccc4cc3c(=O)n2-c2ccc(S(N)(=O)=O)cc2)c1	7.37675
CHEMBL3981551	42	nM	CN(C)C/C=C/C(=O)Nc1cc2c(Nc3ccc(OCc4cccc(F)c4)c(Cl)c3)ncnc2cn1	7.37675
CHEMBL1928952	42	nM	Nc1cc(Nc2cccc(Oc3cc(Nc4ccc(OCc5cccc(F)c5)c(Cl)c4)ncn3)c2)ncn1	7.37675
CHEMBL4473875	42.11	nM	CCOCCOc1cc2ncnc(Nc3ccc(F)c(Cl)c3)c2cc1NC(=O)/C=C/CN(C)C	7.37561
CHEMBL255968	43	nM	C[C@H](Oc1cccc2ncnc(Nc3ccc(OCc4ccccn4)c(Cl)c3)c12)C(=O)N(C)C	7.36653
CHEMBL391181	43	nM	COc1cn2ncnc(Nc3ccc4c(cnn4Cc4cccc(F)c4)c3)c2c1CN1CCC(N)CC1	7.36653
CHEMBL506414	43	nM	Fc1cccc(COc2ccc(Nc3ncnc4sc(-c5cccs5)cc34)cc2Cl)c1	7.36653
CHEMBL512076	43	nM	CCNC(=O)O[C@H]1CN[C@H](C#Cc2cc3ncnc(Nc4ccc(OCc5cccc(F)c5)c(Cl)c4)c3s2)C1	7.36653
CHEMBL257411	43	nM	C[C@@H](Oc1cccc2ncnc(Nc3ccc4c(cnn4Cc4nccs4)c3)c12)C(=O)N1CCOCC1	7.36653
CHEMBL393264	43	nM	CC1(N)CCN(Cc2ccn3ncnc(Nc4ccc5c(cnn5Cc5cccc(F)c5)c4)c23)CC1	7.36653
CHEMBL4754658	43	nM	C=CC(=O)Nc1cccc(-c2c(-c3ccc(N4CCN(C)CC4)cc3)[nH]c3ncnc(Nc4ccc(NC(=O)C(c5ccccc5)N5Cc6ccccc6C5=O)cc4)c23)c1	7.36653
CHEMBL604094	43.5	nM	O=C(CCCCCCOc1ccc2ncnc(Nc3ccc(F)c(Cl)c3)c2c1)NO	7.36151
CHEMBL255865	44	nM	CO/N=C/c1c(N)ncnc1Nc1ccc2c(cnn2Cc2cccc(C#N)c2)c1	7.35655
CHEMBL566337	44	nM	CCC1=C2C(Nc3ccc4c(cnn4Cc4ccccc4)c3)=NC=NC2N=C1NC(=O)OCCn1ccnc1	7.35655
CHEMBL205235	44	nM	Nc1cccc(C#Cc2cncnc2Nc2ccc(OCc3cccc(F)c3)c(Cl)c2)c1	7.35655
CHEMBL455208	44	nM	COc1ccccc1Cc1nc2ccc(-c3nn([C@H]4CC[C@H](N5CCNCC5)CC4)c4ncnc(N)c34)cc2[nH]1	7.35655
CHEMBL228275	44	nM	COCCOc1ccc2ncnc(Nc3ccc(OC4CCN(C(=O)C5CCCC5)CC4)c(C)c3)c2c1	7.35655
CHEMBL584334	44.5	nM	CN1C[C@@H](OC(=O)N2CCC2)C[C@H](C(=O)NO)[C@H]1C(=O)N1CCN(c2ccccc2)CC1	7.35164
CHEMBL208358	45	nM	CS(=O)(=O)Nc1cccc(C#Cc2cncnc2Nc2ccc(OCc3cccc(F)c3)c(Cl)c2)c1	7.34679
CHEMBL3986103	45	nM	CCOc1cc2ncnc(Nc3ccc(NS(=O)(=O)c4ccccc4)cc3)c2cc1NC(=O)/C=C/CN1CCCC1	7.34679
CHEMBL2105719	46	nM	COc1cc2ncnc(Nc3ccc(F)c(Cl)c3)c2cc1NC(=O)/C=C/CN1CCCCC1.O	7.33724
CHEMBL373207	46	nM	CCN(CC)CC#CC(=O)Nc1ccc2ncnc(Nc3ccc(F)c(Cl)c3)c2c1	7.33724
CHEMBL231204	46	nM	COc1ccc2ncnc(Nc3ccc(OC4CCN(C(=O)Nc5c(F)cccc5F)CC4)c(C)c3)c2c1	7.33724
CHEMBL2110732	46	nM	COc1cc2ncnc(Nc3ccc(F)c(Cl)c3)c2cc1NC(=O)/C=C/CN1CCCCC1	7.33724
CHEMBL391321	47	nM	OCCNCc1ccn2ncnc(Nc3ccc4c(cnn4Cc4cccc(F)c4)c3)c12	7.3279
CHEMBL204467	47	nM	OCc1ccc(C#Cc2cncnc2Nc2ccc(OCc3cccc(F)c3)c(Cl)c2)o1	7.3279
CHEMBL593911	47	nM	COc1cc2ncnc(Nc3ccc(-c4nc5ccccc5s4)c(OC)c3)c2cc1OCCCN1CCN(C)CC1	7.3279
CHEMBL422347	48	nM	CS(=O)(=O)CCNc1nc(-c2ccc3ncnc(Nc4ccc(OCc5ccccc5)cc4)c3c2)cs1	7.31876
CHEMBL228926	48	nM	Cc1cc(Nc2ncnc3cnc(N(C)C)cc23)ccc1Oc1ccc(C(=O)NCC(C)(C)C)cc1	7.31876
CHEMBL3344213	48.3	nM	CC(C)NC(CS(C)(=O)=O)c1ccc(-c2ccc3ncnc(Nc4ccc(OCc5cccc(F)c5)c(Cl)c4)c3c2)o1	7.31605
CHEMBL4776708	50	nM	C=CC(=O)Nc1cccc(-c2c(-c3ccc(N4CCN(C)CC4)cc3)[nH]c3ncnc(OC)c23)c1	7.30103
CHEMBL3956820	50	nM	COc1cc2c(Nc3ccc(F)c(Cl)c3F)ncnc2cc1OC[C@H]1CN2CCOC[C@H]2CO1	7.30103
CHEMBL507821	50	nM	O=C(O[C@H]1CN[C@H](C#Cc2cc3ncnc(Nc4ccc5c(cnn5Cc5ccccc5)c4)c3s2)C1)N1CCOCC1	7.30103
CHEMBL3977450	50	nM	COc1cc2c(Nc3cc(Cl)c(Cl)cc3F)ncnc2cc1OC[C@H]1CN2CCOC[C@H]2CO1	7.30103
CHEMBL3955359	50	nM	COc1cc2c(Nc3cccc(Cl)c3F)ncnc2cc1O[C@H]1CO[C@H]2[C@@H]1OC[C@@H]2OC	7.30103
CHEMBL3896122	50	nM	COc1cc2c(Nc3cc(Cl)c(Cl)cc3F)ncnc2cc1OC[C@@H]1CN2CCC[C@H]2CO1	7.30103
CHEMBL3959774	50	nM	COc1cc2c(Nc3ccc(Cl)c(Cl)c3F)ncnc2cc1OC[C@@H]1CN2CCC[C@H]2CO1	7.30103
CHEMBL3933130	50	nM	COc1cc2c(Nc3ccc(Cl)c(Cl)c3F)ncnc2cc1OC[C@@H]1CN(C)CC(=O)N1	7.30103
CHEMBL3928601	50	nM	COc1cc2c(Nc3ccc(Cl)c(Cl)c3)ncnc2cc1OCC1CN(C)CC(C)(C)O1	7.30103
CHEMBL3943734	50	nM	COc1cc2c(Nc3ccc(Br)c(Cl)c3)ncnc2cc1O[C@@H]1CO[C@H]2[C@@H]1OC[C@@H]2NS(C)(=O)=O	7.30103
CHEMBL3893416	50	nM	COc1cc2c(Nc3ccc(Cl)c(Cl)c3)ncnc2cc1OC[C@@H]1CO[C@H]2[C@@H]1OC[C@@H]2OC	7.30103
CHEMBL3914189	50	nM	COc1cc2c(Nc3ccc(Cl)c(Cl)c3)ncnc2cc1OCC1CNCC(C)(C)O1	7.30103
CHEMBL3934095	50	nM	COc1cc2c(Nc3ccc(Br)c(C)c3)ncnc2cc1OCC1CN(C)CCO1	7.30103
CHEMBL3945177	50	nM	COc1cc2c(Nc3ccc(Br)c(Cl)c3)ncnc2cc1OCC1CN(C)CCO1	7.30103
CHEMBL3924998	50	nM	COc1cc2c(Nc3ccc(Br)c(Cl)c3Cl)ncnc2cc1OC[C@@H]1CN2CCC[C@H]2CO1	7.30103
CHEMBL3931427	50	nM	COc1cc2c(Nc3cc(Cl)c(Cl)cc3F)ncnc2cc1OC[C@@H]1CO[C@H]2[C@@H]1OC[C@@H]2OC	7.30103
CHEMBL3958721	50	nM	COc1cc2c(Nc3ccc(Br)c(Cl)c3)ncnc2cc1O[C@@H]1CO[C@H]2[C@@H]1OC[C@@H]2NC(F)(F)F	7.30103
CHEMBL3924147	50	nM	COc1cc2c(Nc3cc(Cl)c(Br)cc3F)ncnc2cc1OC[C@@H]1CN2CCOC[C@H]2CO1	7.30103
CHEMBL3971781	50	nM	COc1cc2c(Nc3ccc(Cl)c(Cl)c3F)ncnc2cc1OC[C@H]1CN2CCOC[C@H]2CO1	7.30103
CHEMBL3914441	50	nM	COc1cc2c(Nc3ccc(Br)c(Cl)c3F)ncnc2cc1OC[C@H]1CN2CCOC[C@H]2CO1	7.30103
CHEMBL3923692	50	nM	COc1cc2c(Nc3ccc(Cl)c(Cl)c3)ncnc2cc1OCC1CN(S(=O)(=O)CCCCl)CCO1	7.30103
CHEMBL3917220	50	nM	COc1cc2c(Nc3ccc(Cl)c(Cl)c3)ncnc2cc1OC[C@H]1CN2CCC[C@@H]2CO1	7.30103
CHEMBL3917294	50	nM	COc1cc2c(Nc3ccc(Cl)c(Cl)c3)ncnc2cc1OCC1CN2CSC[C@H]2CO1	7.30103
CHEMBL3962203	50	nM	COc1cc2c(Nc3ccc(Cl)c(Cl)c3)ncnc2cc1OCCC1CNC(C)(C)CO1	7.30103
CHEMBL3916828	50	nM	COc1cc2c(N[C@H]3COC[C@@H]3OC)ncnc2cc1O[C@H]1CO[C@H]2[C@@H]1OC[C@@H]2O	7.30103
CHEMBL3959495	50	nM	COc1cc2c(Nc3ccc(Cl)c(Cl)c3)ncnc2cc1OCCC1CN(C)C(C)(C)CO1	7.30103
CHEMBL3977503	50	nM	COc1cc2c(Nc3ccc(Br)c(Cl)c3Cl)ncnc2cc1OCC1CN(C)CCO1	7.30103
CHEMBL3893846	50	nM	COc1cc2c(Nc3ccc(Cl)c(Cl)c3)ncnc2cc1OCC1CN(C)C(C)(C)C(=O)O1	7.30103
CHEMBL3947712	50	nM	COc1cc2c(Nc3ccc(Cl)c(Cl)c3F)ncnc2cc1OC[C@@H]1CN2CCC[C@H]2C(=O)N1	7.30103
CHEMBL3958898	50	nM	COc1cc2c(Nc3cc(Cl)c(Br)cc3F)ncnc2cc1OCC1COCCN1C	7.30103
CHEMBL3924098	50	nM	COc1cc2c(Nc3ccc(Br)c(Cl)c3C)ncnc2cc1OCC1CN(C)CCO1	7.30103
CHEMBL3955083	50	nM	COc1cc2c(Nc3cc(F)c(Br)c(F)c3)ncnc2cc1OCC1CN(C)CCO1	7.30103
CHEMBL3939828	50	nM	COc1cc2c(Nc3ccc(Br)c(Cl)c3)ncnc2cc1O[C@@H]1CCOC1	7.30103
CHEMBL3937048	50	nM	COc1cc2c(Nc3cccc(Cl)c3F)ncnc2cc1O[C@H]1CO[C@H]2[C@@H]1OC[C@@H]2F	7.30103
CHEMBL3959516	50	nM	COc1cc2c(Nc3cc(Cl)c(Br)cc3F)ncnc2cc1OC[C@H]1CN2CCOC[C@H]2CO1	7.30103
CHEMBL3952465	50	nM	COc1cc2c(Nc3cc(F)c(Br)cc3F)ncnc2cc1OCC1CN(C)CCO1	7.30103
CHEMBL3941947	50	nM	COc1cc2c(Nc3ccc(Br)c(F)c3F)ncnc2cc1OCC1CN(C)CCO1	7.30103
CHEMBL3939133	50	nM	COc1cc2c(Nc3ccc(Cl)c(Cl)c3)ncnc2cc1OCCC1CN(C)CC(C)(C)O1	7.30103
CHEMBL3972712	50	nM	COc1cc2c(Nc3cc(Cl)c(Br)cc3F)ncnc2cc1OCC1CN(C)C(C)(C)CO1	7.30103
CHEMBL3895129	50	nM	COc1cc2c(Nc3ccc(F)c(Cl)c3F)ncnc2cc1OCC1CN(C)C(C)(C)CO1	7.30103
CHEMBL3968233	50	nM	COc1cc2c(Nc3cc(Cl)c(Cl)cc3F)ncnc2cc1OCC1CN(C)CCO1	7.30103
CHEMBL3935851	50	nM	COc1cc2c(Nc3ccc(Br)c(Cl)c3F)ncnc2cc1OC[C@@H]1CN(C)CC(=O)N1	7.30103
CHEMBL3920036	50	nM	COc1cc2c(Nc3ccc(Cl)c(Cl)c3)ncnc2cc1OC1C[C@@H]2CN(C)C[C@@H]2C1	7.30103
CHEMBL3938869	50	nM	COc1cc2c(Nc3ccc(Br)c(Cl)c3)ncnc2cc1O[C@@H]1CO[C@H]2[C@@H]1OC[C@@H]2C(F)(F)F	7.30103
CHEMBL3896067	50	nM	COc1cc2c(Nc3ccc(Br)c(Cl)c3)ncnc2cc1O[C@H]1CO[C@H]2[C@@H]1OC[C@@H]2S(C)(=O)=O	7.30103
CHEMBL505626	50	nM	CCN(CC)C(=O)O[C@H]1CN[C@H](C#Cc2cc3ncnc(Nc4ccc(OCc5cccc(F)c5)c(Cl)c4)c3s2)C1	7.30103
CHEMBL3895424	50	nM	COc1cc2c(Nc3ccc(Br)c(Cl)c3Cl)ncnc2cc1O[C@@H]1C[C@H]2OC[C@H](OC)[C@H]2O1	7.30103
CHEMBL3909626	50	nM	COc1cc2c(Nc3ccc(Cl)c(Cl)c3)ncnc2cc1OCCN1C(=O)c2ccccc2C1=O	7.30103
CHEMBL3964605	50	nM	COc1cc2c(Nc3ccc(Br)c(Cl)c3)ncnc2cc1O[C@@H]1C[C@H]2OCC3(OCCO3)[C@H]2O1	7.30103
CHEMBL3949434	50	nM	COc1cc2c(Nc3ccc(Cl)c(Cl)c3)ncnc2cc1OC[C@@H]1O[C@@H](OC)[C@@H](O)[C@H](O)[C@H]1O	7.30103
CHEMBL190094	50	nM	CN(C)C/C=C/C(=O)Nc1ccc2ncnc(Nc3cc(Cl)c(Cl)cc3F)c2c1	7.30103
CHEMBL275762	50	nM	O=C(CCl)Nc1ccc2ncnc(Nc3cc(Cl)c(Cl)cc3F)c2c1	7.30103
CHEMBL3945028	50	nM	COc1cc2c(Nc3ccc(Br)c(Cl)c3)ncnc2cc1O[C@@H]1CO[C@H]2[C@@H]1OC[C@@H]2O	7.30103
CHEMBL3928696	50	nM	COc1cc2c(Nc3ccc(Cl)c(Cl)c3)ncnc2cc1OCC1CC1	7.30103
CHEMBL3945353	50	nM	COc1cc2c(Nc3ccc(Cl)c(Cl)c3)ncnc2cc1OCc1nc2c(s1)CNCC2	7.30103
CHEMBL3932115	50	nM	COc1cc2c(Nc3ccc(Br)c(Cl)c3)ncnc2cc1O[C@H]1CO[C@@H]2CCO[C@H]12	7.30103
CHEMBL3922278	50	nM	COc1cc2c(Nc3ccc(F)c(Cl)c3F)ncnc2cc1OC[C@@H]1CN2CCC[C@H]2CO1	7.30103
CHEMBL3921689	50	nM	COc1cc2c(Nc3ccc(Br)c(Cl)c3)ncnc2cc1O[C@H]1CO[C@H]2[C@@H]1OC[C@@H]2OC(F)F	7.30103
CHEMBL3962487	50	nM	COc1cc2c(Nc3ccc(Br)c(Cl)c3F)ncnc2cc1OC[C@@H]1CN2CCC[C@H]2CO1	7.30103
CHEMBL3907230	50	nM	CCO[C@H]1CO[C@H]2[C@@H]1OC[C@@H]2Oc1cc2ncnc(Nc3ccc(Br)c(Cl)c3)c2cc1OC	7.30103
CHEMBL3910031	50	nM	COc1cc2c(Nc3ccc(Br)c(Cl)c3)ncnc2cc1O[C@H]1CO[C@H]2[C@@H]1OC[C@@H]2OC	7.30103
CHEMBL3964556	50	nM	COc1cc2c(Nc3ccc(Cl)c(Cl)c3)ncnc2cc1O[C@H]1CO[C@H]2[C@@H]1OC[C@@H]2OC	7.30103
CHEMBL3919145	50	nM	COc1cc2c(Nc3ccc(Cl)c(Cl)c3)ncnc2cc1O[C@@H]1C[C@H]2OC[C@H](OC)[C@H]2O1	7.30103
CHEMBL3936151	50	nM	CCN1CCOC(COc2cc3ncnc(Nc4ccc(Cl)c(Cl)c4)c3cc2OC)C1	7.30103
CHEMBL3893363	50	nM	COc1cc2c(Nc3ccc(Br)c(Cl)c3)ncnc2cc1O[C@H]1CO[C@H]2[C@@H]1OC[C@@H]2O	7.30103
CHEMBL3906715	50	nM	COc1cc2c(Nc3cc(Cl)c(Cl)c(Cl)c3)ncnc2cc1OCC1CN(C)CCO1	7.30103
CHEMBL3986404	50	nM	COc1cc2c(Nc3ccc(Cl)c(Cl)c3F)ncnc2cc1O[C@@H]1C[C@H]2OC[C@H](OC)[C@H]2O1	7.30103
CHEMBL3908311	50	nM	COc1cc2c(Nc3cc(Cl)c(Cl)cc3F)ncnc2cc1OC[C@@H]1CN2CCOC[C@H]2CO1	7.30103
CHEMBL3946242	50	nM	COc1cc2c(Nc3ccc(F)c(Cl)c3F)ncnc2cc1OC[C@@H]1CN2CCOC[C@H]2CO1	7.30103
CHEMBL3916225	50	nM	COc1cc2c(Nc3ccc(C)c(Br)c3)ncnc2cc1OCC1CN(C)CCO1	7.30103
CHEMBL3919051	50	nM	CCCCN1CCOC(COc2cc3ncnc(Nc4ccc(Cl)c(Cl)c4)c3cc2OC)C1	7.30103
CHEMBL3961005	50	nM	COc1cc2c(Nc3ccc(Br)c(Cl)c3F)ncnc2cc1O[C@@H]1C[C@H]2OC[C@H](OC)[C@H]2O1	7.30103
CHEMBL3944791	50	nM	COc1cc2c(Nc3ccc(Cl)c(Cl)c3Cl)ncnc2cc1OCC1CN(C)CCO1	7.30103
CHEMBL3968522	50	nM	COc1cc2c(Nc3cc(Cl)c(Br)cc3F)ncnc2cc1OC[C@@H]1CN2CCC[C@H]2CO1	7.30103
CHEMBL3898088	50	nM	COc1cc2c(Nc3ccc(Cl)c(Cl)c3)ncnc2cc1OCc1csc(C2CCN(C)CC2)n1	7.30103
CHEMBL3958678	50	nM	COc1cc2c(Nc3ccc(Cl)c(Cl)c3)ncnc2cc1OCc1csc(N2CCN(C)CC2)n1	7.30103
CHEMBL3923153	50	nM	COc1cc2c(Nc3ccc(Cl)c(Cl)c3)ncnc2cc1OCC1CN(CCCCCC#N)CCO1	7.30103
CHEMBL3914599	50	nM	CCCN1CCCOC(COc2cc3ncnc(Nc4ccc(Cl)c(Cl)c4)c3cc2OC)C1	7.30103
CHEMBL3930406	50	nM	COc1cc2c(Nc3ccc(Cl)c(Cl)c3)ncnc2cc1OCc1csc(C2CCCN(C)C2)n1	7.30103
CHEMBL3928883	50	nM	COc1cc2c(Nc3ccc(Cl)c(Cl)c3)ncnc2cc1OC[C@@H]1CN2CCC[C@H]2CO1	7.30103
CHEMBL3983938	50	nM	CCN1CCCOC(COc2cc3ncnc(Nc4ccc(Cl)c(Cl)c4)c3cc2OC)C1	7.30103
CHEMBL3981432	50	nM	COc1cc2c(Nc3ccc(Br)c(Cl)c3Cl)ncnc2cc1OCC1CN(C)C(C)(C)CO1	7.30103
CHEMBL569389	50.5	nM	CN1C[C@@H](OC(=O)N2CCC(F)(F)C2)C[C@H](C(=O)NO)[C@H]1C(=O)N1CCN(c2ccccc2)CC1	7.29671
CHEMBL256576	51	nM	C[C@@H](Oc1cccc2ncnc(Nc3ccc4c(cnn4Cc4ccccn4)c3)c12)C(=O)N1CCOCC1	7.29243
CHEMBL231100	51	nM	Cc1cc(Nc2ncnc3cnc(N(C)C)cc23)ccc1OC1CCN(C(=O)CC(C)(C)C)CC1	7.29243
CHEMBL598611	51.6	nM	C#Cc1cccc(Nc2ncnc3cc(OCCCCCCC(=O)NO)c(OC)cc23)c1	7.28735
CHEMBL567939	52	nM	CC(C)C(=O)N(C)C1CN[C@H](C(=O)N2CC[C@H](c3ccccc3)C2)[C@@H](C(=O)NO)C1	7.284
CHEMBL246687	52	nM	N[C@H]1CCN(Cc2ccn3ncnc(Nc4ccc5c(cnn5Cc5cccc(F)c5)c4)c23)C1	7.284
CHEMBL207247	52	nM	CC(=O)NCc1cccc(C#Cc2cncnc2Nc2ccc(OCc3cccc(F)c3)c(Cl)c2)c1	7.284
CHEMBL221857	52	nM	O=C(NO)[C@H]1CC2(CC2)CN[C@@H]1C(=O)N1CCN(c2ccccc2)CC1	7.284
CHEMBL3344214	52.2	nM	CS(=O)(=O)CCNC(CS(C)(=O)=O)c1ccc(-c2ccc3ncnc(Nc4ccc(OCc5cccc(F)c5)c(Cl)c4)c3c2)o1	7.28233
CHEMBL3904257	53	nM	O=C(/C=C/CN1CCCC1)Nc1cc2c(Nc3ccc(OCc4cccc(F)c4)c(Cl)c3)ncnc2cn1	7.27572
CHEMBL437584	53	nM	COc1ccccc1Cc1nc2ccc(-c3nn([C@H]4CC[C@H](N5CCOCC5)CC4)c4ncnc(N)c34)cc2[nH]1	7.27572
CHEMBL93386	53	nM	O=C(C#CCN1CCOCC1)Nc1ccc2ncnc(Nc3cccc(Br)c3)c2c1	7.27572
CHEMBL3436360	53.3	nM	CN1CCN(C(=O)c2ccc(-c3ccc4ncnc(Nc5ccc(OCc6cccc(F)c6)c(Cl)c5)c4c3)o2)CC1.Cc1ccc(S(=O)(=O)O)cc1	7.27327
CHEMBL448929	54	nM	CCc1cc(Nc2nccc(-c3c(-c4cccc(C(=O)Nc5c(F)cccc5F)c4)nc4ccccn34)n2)c(OC)cc1N1CCC(N2CCN(S(C)(=O)=O)CC2)CC1	7.26761
CHEMBL2374458	54	nM	COc1ccccc1Cc1nc2ccc(-c3nn([C@H]4CC[C@H](C5CCN(C)CC5)CC4)c4ncnc(N)c34)cc2[nH]1	7.26761
CHEMBL2374457	54	nM	COCCCN1CCC([C@H]2CC[C@H](n3nc(-c4ccc5nc(Cc6ccccc6Cl)[nH]c5c4)c4c(N)ncnc43)CC2)CC1	7.26761
CHEMBL391779	54	nM	CNC1CCN(Cc2ccn3ncnc(Nc4ccc5c(cnn5Cc5cccc(F)c5)c4)c23)CC1	7.26761
CHEMBL4437943	54	nM	O=C(CCSC(=S)N1CCN(c2ccccc2)CC1)Nc1cccc(NC(=O)c2ccccn2)c1	7.26761
CHEMBL443098	54	nM	COCCCN1CCN([C@H]2CC[C@H](n3nc(-c4ccc5nc(Cc6ccccc6OC)[nH]c5c4)c4c(N)ncnc43)CC2)CC1	7.26761
CHEMBL495979	54	nM	Fc1cccc(COc2ccc(Nc3ncnc4cc(C#C[C@@H]5CCCN5)sc34)cc2Cl)c1	7.26761
CHEMBL205045	55	nM	Fc1cccc(COc2ccc(Nc3ncncc3C#Cc3ccccn3)cc2Cl)c1	7.25964
CHEMBL388483	55	nM	Cc1cc(Nc2ncnc3ccc(OCCCN4CCOCC4)cc23)ccc1OC1CCN(C(=O)Nc2c(F)cccc2F)CC1	7.25964
CHEMBL4740009	55	nM	C=CC(=O)Nc1cccc(-c2c(-c3ccc(N4CCN(C)CC4)cc3)[nH]c3ncnc(Nc4ccc(CN5C(=O)c6ccccc6C5=O)cc4)c23)c1	7.25964
CHEMBL246284	55	nM	Fc1cccc(Cn2ncc3cc(Nc4ncnn5ccc(COC[C@@H]6CNCCO6)c45)ccc32)c1	7.25964
CHEMBL1090364	55	nM	O=C(Cc1ccccc1)Nc1cccc(-c2nc3sccn3c2-c2ccnc(Nc3ccc4c(c3)CCNC4)n2)c1	7.25964
CHEMBL1922906	55	nM	FC(F)(F)Oc1ccccc1Oc1ccc(Nc2ncnc3cc[nH]c23)cc1Cl	7.25964
CHEMBL371888	56	nM	COc1cc2ncnc(Nc3ccc(OCc4ccccn4)c(C)c3)c2cc1OC	7.25181
CHEMBL256994	57	nM	CNC(=O)[C@@H](C)Oc1cccc2ncnc(Nc3ccc4c(cnn4Cc4cccc(F)c4)c3)c12	7.24413
CHEMBL3344212	58.6	nM	CS(=O)(=O)CC(NC1CCCCC1)c1ccc(-c2ccc3ncnc(Nc4ccc(OCc5cccc(F)c5)c(Cl)c4)c3c2)o1	7.2321
CHEMBL452717	59	nM	COc1ccccc1Cc1nc2ccc(-c3nn([C@H]4CC[C@H](N5CCN(C(C)=O)CC5)CC4)c4ncnc(N)c34)cc2[nH]1	7.22915
CHEMBL4578466	59	nM	CCOc1cc2ncc(C#N)c(Nc3ccc(OCc4ccccn4)c(F)c3)c2cc1NC(=O)/C=C/CN(C)C	7.22915
CHEMBL205765	59	nM	CC(=O)Nc1cccc(C#Cc2cncnc2Nc2ccc(OCc3cccc(F)c3)c(Cl)c2)n1	7.22915
CHEMBL256364	59	nM	CNC(=O)[C@@H](C)Oc1cccc2ncnc(Nc3ccc4c(cnn4Cc4ccccn4)c3)c12	7.22915
CHEMBL3092325	59	nM	CCOc1cc2ncc(C#N)c(Nc3ccc(OCc4ccccn4)cc3)c2cc1NC(=O)/C=C/CN(C)C	7.22915
CHEMBL180022	59	nM	CCOc1cc2ncc(C#N)c(Nc3ccc(OCc4ccccn4)c(Cl)c3)c2cc1NC(=O)/C=C/CN(C)C	7.22915
CHEMBL453398	60	nM	O=C(O[C@H]1CN[C@H](C#Cc2cc3ncnc(Nc4ccc(Oc5ccccn5)c(Cl)c4)c3s2)C1)N1CCOCC1	7.22185
CHEMBL248115	60	nM	Cc1cncc(COc2ccc(Nc3ncnn4ccc(CN5CCC(N)CC5)c34)cc2Cl)c1	7.22185
CHEMBL500217	60	nM	O=C(O[C@H]1CN[C@H](C#Cc2cc3ncnc(Nc4ccc5c(ccn5Cc5ccccc5)c4)c3s2)C1)N1CCOCC1	7.22185
CHEMBL1923002	60	nM	Cc1ccc(Oc2ccc(Nc3ncnc4cc[nH]c34)cc2C)cn1	7.22185
CHEMBL428046	60	nM	Fc1cccc(Cn2ncc3cc(Nc4ncnn5ccc(COC[C@H]6CNCCO6)c45)ccc32)c1	7.22185
CHEMBL2178352	60	nM	CN1CCN(c2ccc(Nc3ncc4nc(Nc5ccccc5)n(C5CCCC5)c4n3)cc2)CC1	7.22185
CHEMBL455434	60	nM	O=C(O[C@H]1CN[C@H](C#Cc2cc3ncnc(Nc4ccc(Cc5ccccc5)cc4)c3s2)C1)N1CCOCC1	7.22185
CHEMBL4250540	60	nM	CO[C@H]1/C=C\C=C(/C)C(=O)NC2=CC(=O)C(NCCCCNC3=C4C[C@@H](C)C[C@H](OC)[C@H](O)[C@@H](C)/C=C(\C)[C@H](OC(N)=O)[C@@H](OC)/C=C\C=C(/C)C(=O)NC(=CC3=O)C4=O)=C(C[C@@H](C)C[C@H](OC)[C@H](O)[C@@H](C)/C=C(\C)[C@@H]1OC(N)=O)C2=O	7.22185
CHEMBL508760	60	nM	O=C(O[C@H]1CN[C@H](C#Cc2cc3ncnc(Nc4ccc(OCc5cscn5)c(Cl)c4)c3s2)C1)N1CCOCC1	7.22185
CHEMBL497026	60	nM	O=C(NO)[C@H]1CC(CC(=O)N2CCCCC2)CC[C@@H]1C(=O)N1CCN(c2ccccc2)CC1	7.22185
CHEMBL207869	60	nM	Fc1cccc(COc2ccc(Nc3ncncc3C#Cc3ncccn3)cc2Cl)c1	7.22185
CHEMBL245667	60	nM	NCCCOCc1ccn2ncnc(Nc3ccc4c(cnn4Cc4cccc(F)c4)c3)c12	7.22185
CHEMBL3948267	62	nM	O=C(/C=C/CN1CCCC1)Nc1cc2c(Nc3ccc4c(cnn4Cc4ccccc4)c3)ncnc2cn1	7.20761
CHEMBL1934626	62	nM	Cc1ncnc(Nc2ccc(OCc3cccc(F)c3)c(Cl)c2)c1C#Cc1ccc(CN2CCCC2)c(F)c1	7.20761
CHEMBL1256426	62	nM	CC(C)N1CCN([C@H]2CC[C@@H](n3nc(-c4ccc(Nc5nc6cccc(Cl)c6o5)cc4)c4c(N)ncnc43)CC2)CC1	7.20761
CHEMBL3949347	62	nM	CN(C)C/C=C/C(=O)Nc1cc2c(Nc3ccc4c(cnn4Cc4ccccc4)c3)ncnc2cn1	7.20761
CHEMBL5180725	62.26	nM	Cc1cc(Nc2c(C#N)cnc3ccc(NC(=O)/C=C/CN(C)C)cc23)ccc1Oc1cc2nncn2cn1	7.20579
CHEMBL401443	63	nM	OC1CCN(Cc2ccn3ncnc(Nc4ccc5c(cnn5Cc5cccc(F)c5)c4)c23)CC1	7.20066
CHEMBL450396	63	nM	O=C(O[C@H]1CN[C@@H](C#Cc2cc3ncnc(Nc4ccc(OCc5cccc(F)c5)c(Cl)c4)c3s2)C1)N1CCOCC1	7.20066
CHEMBL466175	63	nM	CN(C)C(=O)O[C@H]1CN[C@@H](C#Cc2cc3ncnc(Nc4ccc(OCc5cccc(F)c5)c(Cl)c4)c3s2)C1	7.20066
CHEMBL466615	63	nM	CN(C)C(=O)O[C@@H]1CN[C@H](C#Cc2cc3ncnc(Nc4ccc(OCc5cccc(F)c5)c(Cl)c4)c3s2)C1	7.20066
CHEMBL466614	63	nM	CCNC(=O)O[C@@H]1CN[C@H](C#Cc2cc3ncnc(Nc4ccc(OCc5cccc(F)c5)c(Cl)c4)c3s2)C1	7.20066
CHEMBL4437803	64	nM	O=C(Nc1cccc(NC(=O)c2ccccn2)c1)NC1CCCCC1	7.19382
CHEMBL2348415	65	nM	CS(=O)(=O)CCNC(=O)C1=Cc2c(ncnc2Nc2ccc(Oc3cccc(C(F)(F)F)c3)c(Cl)c2)NCC1	7.18709
CHEMBL205284	66	nM	Fc1cccc(COc2ccc(Nc3ncncc3C#Cc3cc[nH]n3)cc2Cl)c1	7.18046
CHEMBL403594	66	nM	CNC(=O)[C@@H](C)Oc1cccc2ncnc(Nc3ccc(OCc4ccccn4)c(Cl)c3)c12	7.18046
CHEMBL3218000	66	nM	C#Cc1cccc(Nc2ncnc3ccc(OCc4ccc(C(=O)Nc5ccccc5N)cc4)cc23)c1	7.18046
CHEMBL3133822	66	nM	Clc1cccc(Nc2ccnc3[nH]c4ccccc4c23)c1	7.18046
CHEMBL202421	67	nM	CCCCN(CC#CC(=O)Nc1cc2c(Nc3ccc(F)c(Cl)c3)ncnc2cn1)CCCC	7.17393
CHEMBL496829	67	nM	CC(C)c1cccc(C2CCN(C(=O)[C@H]3CC[C@H](CC(=O)N4CCCCC4)C[C@@H]3C(=O)NO)CC2)c1	7.17393
CHEMBL473429	68	nM	N#CCNCc1ccc(-c2cc3ncnc(Nc4ccc(OCc5cccc(F)c5)c(Cl)c4)c3s2)o1	7.16749
CHEMBL473438	68	nM	CCNCc1ccc(-c2cc3ncnc(Nc4ccc(OCc5cccc(F)c5)c(Cl)c4)c3s2)[nH]1	7.16749
CHEMBL517123	68	nM	CN(C)C(=O)O[C@H]1CN[C@H](C#Cc2cc3ncnc(Nc4ccc(OCc5cccc(F)c5)c(Cl)c4)c3s2)C1	7.16749
CHEMBL380078	69	nM	CNC(=O)NCc1cccc(C#Cc2cncnc2Nc2ccc(OCc3cccc(F)c3)c(Cl)c2)n1	7.16115
CHEMBL257478	69	nM	Cc1ccc(Oc2ccc(Nc3ncnc4cccc(O[C@H](C)C(=O)N(C)CCO)c34)cc2C)cn1	7.16115
CHEMBL393848	70	nM	N[C@@H]1CCN(Cc2ccn3ncnc(Nc4ccc5c(cnn5Cc5cccc(F)c5)c4)c23)C1	7.1549
CHEMBL1645477	70	nM	COc1ccc(Nc2ncnn3ccc(CN4CCC(N)CC4)c23)cc1Cl	7.1549
CHEMBL194337	70	nM	CN1CCC(Oc2cccc3ncnc(Nc4ccc(OCc5ccccn5)cc4)c23)CC1	7.1549
CHEMBL245869	70	nM	Fc1cccc(Cn2ncc3cc(Nc4ncnn5ccc(COC6CCNCC6)c45)ccc32)c1	7.1549
CHEMBL586042	70	nM	O=C(NO)[C@H]1CC(OC(=O)N2CCCC2)CN[C@@H]1C(=O)N1Cc2ccccc2C1	7.1549
CHEMBL1683972	70	nM	Cc1ncnc(Nc2ccc(OCc3cccc(F)c3)c(Cl)c2)c1C#C/C=N/OCCN1CCOCC1	7.1549
CHEMBL1683968	71	nM	Cc1ncnc(Nc2ccc(OCc3cccc(F)c3)c(Cl)c2)c1/C=C(\F)C(=O)NCCS(C)(=O)=O	7.14874
CHEMBL475768	71	nM	CS(=O)(=O)CCNCc1ccc(-c2cc3ncnc(Nc4ccc(OCc5cccc(F)c5)c(Cl)c4)c3s2)o1	7.14874
CHEMBL598610	71.2	nM	COc1cc2c(Nc3ccc(F)c(Cl)c3)ncnc2cc1OCCCCCCC(=O)NO	7.14752
CHEMBL507714	72	nM	COc1cc(N2CCC(N3CCN(S(C)(=O)=O)CC3)CC2)ccc1Nc1nccc(-c2c(-c3cccc(C(=O)Nc4c(F)cccc4F)c3)nc3ccccn23)n1	7.14267
CHEMBL515664	72	nM	COC[C@H]1CCCN1/N=C/c1c(N)ncnc1Nc1ccc2c(cnn2Cc2cccc(F)c2)c1	7.14267
CHEMBL443523	73	nM	C=CC(=O)Nc1ccc2c(Nc3cccc(Br)c3)ncnc2c1	7.13668
CHEMBL1933083	73	nM	Cc1ncnc(Nc2ccc(OCc3cccc(F)c3)c(Cl)c2)c1C#Cc1cccc(CN(C)C)c1	7.13668
CHEMBL1090360	73	nM	O=C(Cc1ccccc1)Nc1cccc(-c2nc3sccn3c2-c2ccnc(Nc3cccc(N4CCOCC4)c3)n2)c1	7.13668
CHEMBL90595	73	nM	O=C(C#CCN1CCCCC1)Nc1ccc2ncnc(Nc3cccc(Br)c3)c2c1	7.13668
CHEMBL3958482	73	nM	COc1cc2ncnc(Nc3ccc(Oc4ccccc4)cc3)c2cc1NC(=O)/C=C/CN1CCCCC1	7.13668
CHEMBL1683970	74	nM	Cc1ncnc(Nc2ccc(OCc3cccc(F)c3)c(Cl)c2)c1C#CCCN1CCOCC1	7.13077
CHEMBL398793	74	nM	CC1CNCCN(Cc2ccn3ncnc(Nc4ccc5c(cnn5Cc5cccc(F)c5)c4)c23)C1	7.13077
CHEMBL230255	75	nM	Cc1cc(Nc2ncnc3ccc(OCCCN4CCOCC4)cc23)ccc1OC1CCN(C(=O)CC(C)(C)C)CC1	7.12494
CHEMBL3357634	75	nM	COc1cc2ncnc(Nc3ccc(F)c(Cl)c3)c2cc1NC(=O)/C(F)=C/CN(C)C	7.12494
CHEMBL5208454	75.1	nM	O=C(CCCl)Nc1ccc2ncnc(Nc3ccc4[nH]cc(Br)c4c3)c2c1	7.12436
CHEMBL402316	76	nM	CO/N=C/c1c(N)ncnc1Nc1ccc2[nH]c(Cc3cccc(F)c3)nc2c1	7.11919
CHEMBL393787	76	nM	O[C@@H]1CNCCN(Cc2ccn3ncnc(Nc4ccc5c(cnn5Cc5cccc(F)c5)c4)c23)C1	7.11919
CHEMBL389457	76	nM	COCC(=O)NCC#Cc1ccc2ncnc(Nc3ccc(OC4CCN(C(=O)Nc5c(F)cccc5F)CC4)c(C)c3)c2c1	7.11919
CHEMBL473437	76	nM	CN(C)Cc1ccc(-c2cc3ncnc(Nc4ccc(OCc5cccc(F)c5)c(Cl)c4)c3s2)[nH]1	7.11919
CHEMBL392664	76	nM	Fc1cccc(Cn2ncc3cc(Nc4ncnn5ccc(CNC6CCNCC6)c45)ccc32)c1	7.11919
CHEMBL598798	76.5	nM	C#Cc1cc(Nc2ncnc3cc(OC)c(OCCCCCCC(=O)NO)cc23)ccc1F	7.11634
CHEMBL578255	77	nM	CCC1=C2C(Nc3ccc4c(cnn4Cc4ccccc4)c3)=NC=NC2N=C1NC(=O)OCCN1CCOCC1	7.11351
CHEMBL3912361	77	nM	O=C(CCl)OCCn1c(=O)oc2cc3ncnc(Nc4ccc(N5CCCCC5)c(Cl)c4)c3cc21	7.11351
CHEMBL3633774	77	nM	NC(=O)Nc1ccc2ncnc(Nc3ccc(Oc4cccc(C(F)(F)F)c4)c(Cl)c3)c2c1	7.11351
CHEMBL387543	77	nM	COc1cc2ncnc(Nc3ccc(Oc4ccc(C(=O)NCC(C)(C)C)cc4)c(C)c3)c2cc1OC	7.11351
CHEMBL231103	77	nM	COCCOc1cc2ncnc(Nc3ccc(OC4CCN(C(=O)C5CCCC5)CC4)c(C)c3)c2cc1OCCOC	7.11351
CHEMBL430410	78	nM	Cc1ccc(Oc2ccc(Nc3ncnc4cccc(O[C@@H](C)C(=O)N(C)CCO)c34)cc2C)cn1	7.10791
CHEMBL3092314	78	nM	CCN(CC)CCCNC(=O)Nc1cc2c(Nc3ccc(F)c(Cl)c3)ncnc2cc1O[C@H]1CCOC1	7.10791
CHEMBL525805	78	nM	CCOC(=O)N[C@H]1CN[C@H](C#Cc2cc3ncnc(Nc4ccc(OCc5cccc(F)c5)c(Cl)c4)c3s2)C1	7.10791
CHEMBL5173449	78	nM	COc1ccc(-c2c(CN3CCOCC3)nc3scc(C(=O)NN)n23)cc1	7.10791
CHEMBL1683965	78	nM	Cc1ncnc(Nc2ccc(OCc3cccc(F)c3)c(Cl)c2)c1/C=C(\F)C(=O)NCCN1CCOCC1	7.10791
CHEMBL1928955	79	nM	O=C(COc1ccccc1)Nc1cccc(Oc2cc(Nc3ccc(OCc4cccc(F)c4)c(Cl)c3)ncn2)c1	7.10237
CHEMBL256060	79	nM	C[C@H](Oc1cccc2ncnc(Nc3ccc(OCc4ccccn4)c(Cl)c3)c12)C(=O)N(C)CCO	7.10237
CHEMBL402657	80	nM	C[C@H](Oc1cccc2ncnc(Nc3ccc4c(cnn4Cc4ccccn4)c3)c12)C(=O)N(C)C	7.09691
CHEMBL472545	80	nM	Nc1ncnc(Nc2ccc(OCc3ccccc3)c(Cl)c2)c1-c1nnc(CCN2CCOCC2)o1	7.09691
CHEMBL1683963	81	nM	C/C(=C\c1c(C)ncnc1Nc1ccc(OCc2cccc(F)c2)c(Cl)c1)C(=O)NCCN1CCOCC1	7.09151
CHEMBL231875	81	nM	Fc1cccc(Cn2ncc3cc(Nc4ncnn5ccc(CN6CCNCC6)c45)ccc32)c1	7.09151
CHEMBL4090083	82	nM	NP(=O)(OCCCCOc1ccc2ncnc(Nc3cccc(Br)c3)c2c1)N(CCCl)CCCl	7.08619
CHEMBL4450824	83.84	nM	CC(C)OCCOc1cc2ncnc(Nc3ccc(F)c(Cl)c3)c2cc1NC(=O)/C=C/CN(C)C	7.07655
CHEMBL4795863	84	nM	C=CC(=O)Nc1cccc(-c2c(-c3ccc(N4CCN(C)CC4)cc3)[nH]c3ncn(CC)c(=O)c23)c1	7.07572
CHEMBL507329	84	nM	O=C(O[C@H]1CN[C@H](C#Cc2cc3ncnc(Nc4ccc(OCc5cccc(F)c5)c(Cl)c4)c3s2)C1)N1CCOCC1	7.07572
CHEMBL497697	84	nM	CN/N=C/c1c(N)ncnc1Nc1ccc2c(cnn2Cc2cccc(F)c2)c1	7.07572
CHEMBL3680375	84.05	nM	O=C(/C=C/CN1CCCCC1)Nc1cc2c(Nc3ccc(F)c(Cl)c3)ncnc2cc1OCCCN1CCOCC1	7.07546
CHEMBL451074	85	nM	O=C(O[C@H]1CN[C@H](C#Cc2cc3ncnc(Nc4ccc5c(cnn5S(=O)(=O)c5cccc(F)c5)c4)c3s2)C1)N1CCOCC1	7.07058
CHEMBL414220	85	nM	C=CCN(C)CC#CC(=O)Nc1ccc2ncnc(Nc3cccc(Br)c3)c2c1	7.07058
CHEMBL248891	85	nM	COCc1cccc2[nH]c(-c3n[nH]c4ncc(-c5cncc6ccccc56)cc34)nc12	7.07058
CHEMBL3680378	85.98	nM	COc1cc2ncnc(Nc3ccc(F)c(Cl)c3)c2cc1NC(=O)/C=C/CN1CCCCCC1	7.0656
CHEMBL1934633	86	nM	Cc1ncnc(Nc2ccc(OCc3cccc(F)c3)c(Cl)c2)c1/C=C/c1ccc(CNC2CC2)cc1	7.0655
CHEMBL475769	86	nM	CS(=O)(=O)CCNCc1cc(-c2cc3ncnc(Nc4ccc(OCc5cccc(F)c5)c(Cl)c4)c3s2)co1	7.0655
CHEMBL1088931	86	nM	O=C(Nc1cccc(-c2nc3sccn3c2-c2ccnc(Nc3cccc(N4CCOCC4)c3)n2)c1)c1c(F)cccc1F	7.0655
CHEMBL1090351	86	nM	O=C(Nc1cccc(-c2nc3sccn3c2-c2ccnc(Nc3ccc(N4CCOCC4)cc3)n2)c1)c1c(F)cccc1F	7.0655
CHEMBL501705	87	nM	CCS(=O)(=O)N[C@H]1CN[C@H](C#Cc2cc3ncnc(Nc4ccc(OCc5cccc(F)c5)c(Cl)c4)c3s2)C1	7.06048
CHEMBL455433	87	nM	O=C(O[C@H]1CN[C@H](C#Cc2cc3ncnc(NCc4cccc(Oc5ccccc5)c4)c3s2)C1)N1CCOCC1	7.06048
CHEMBL495733	88	nM	CS(=O)(=O)N1CCC[C@@H]1C#Cc1cc2ncnc(Nc3ccc(OCc4cccc(F)c4)c(Cl)c3)c2s1	7.05552
CHEMBL427671	88	nM	Cc1ccn2ncnc(Nc3ccc4c(cnn4Cc4cccc(F)c4)c3)c12	7.05552
CHEMBL5193128	88	nM	C=CC(=O)N1CCC([C@@H]2CCNC3C(C(N)=O)C(c4ccc(Oc5ccccc5)cc4)=NN32)CC1	7.05552
CHEMBL2408051	89	nM	CNC(=O)CN1CCC(Oc2cc3c(Nc4ccc(F)c(Cl)c4F)ncnc3cc2OC)CC1	7.05061
CHEMBL3921555	89	nM	CN1CCN(C/C=C/C(=O)Nc2cc3c(Nc4ccc(F)c(Cl)c4)ncnc3cn2)CC1	7.05061
CHEMBL249303	89	nM	CCN(CC)Cc1cccc2[nH]c(-c3n[nH]c4ncc(-c5cncc6ccccc56)cc34)nc12	7.05061
CHEMBL215033	90	nM	COc1cc(Nc2ncnc3ccc(-c4ccc(CNCCS(C)(=O)=O)o4)cc23)ccc1OCc1cccc(F)c1	7.04576
CHEMBL381115	90	nM	COc1ccc(I)c(Sc2nc3c(N)ncnc3n2CCNCC(C)(C)C)c1	7.04576
CHEMBL500381	90	nM	CCC(=O)O[C@H]1CN[C@H](C#Cc2cc3ncnc(Nc4ccc(OCc5cccc(F)c5)c(Cl)c4)c3s2)C1	7.04576
CHEMBL402011	90	nM	C[C@@H](Oc1cccc2ncnc(Nc3ccc4c(cnn4Cc4ccccn4)c3)c12)C(=O)N(C)C	7.04576
CHEMBL394333	90	nM	NCCOCc1ccn2ncnc(Nc3ccc4c(cnn4Cc4cccc(F)c4)c3)c12	7.04576
CHEMBL204625	91	nM	Nc1ccccc1C#Cc1cncnc1Nc1ccc(OCc2cccc(F)c2)c(Cl)c1	7.04096
CHEMBL3895468	91	nM	CN(C)C/C=C/C(=O)Nc1cc2c(Nc3ccc(F)c(Cl)c3)ncnc2cc1OCC12COCC1C2	7.04096
CHEMBL221698	92	nM	O=C(NO)[C@H]1CC2(CC2)CN[C@@H]1C(=O)N1CC[C@H](c2ccccc2)C1	7.03621
CHEMBL4519470	93	nM	COc1cc2ncnc(Nc3ccc(Oc4ccc(C)nc4)c(C)c3)c2cc1NC(=O)CC1CCSS1	7.03152
CHEMBL230575	94	nM	COCC(=O)NCC#Cc1ccc2ncnc(Nc3ccc(OC4CCN(C(=O)CC(C)(C)C)CC4)c(C)c3)c2c1	7.02687
CHEMBL1683973	95	nM	Cc1ncnc(Nc2ccc(OCc3cccc(F)c3)c(Cl)c2)c1C#CCCCN1CCCC1	7.02228
CHEMBL15346	95	nM	CS(=O)(=O)CCNCCCCOc1ccc2ncnc(Nc3ccc(OCc4ccccc4)cc3)c2c1	7.02228
CHEMBL481324	95	nM	CS(=O)(=O)CCNCc1ccc(-c2cc3c(Nc4ccc(OCc5cccc(F)c5)c(Cl)c4)ncnc3s2)s1	7.02228
CHEMBL4791900	95	nM	C=CC(=O)Nc1cccc(-c2c(-c3ccc(N4CCN(C)CC4)cc3)[nH]c3ncnc(Nc4ccc(OCc5cccc(F)c5)c(Cl)c4)c23)c1	7.02228
CHEMBL255438	95	nM	Nc1ncnc(Nc2ccc3c(cnn3Cc3cccc(F)c3)c2)c1/C=N/OCc1ccccc1	7.02228
CHEMBL230995	96	nM	COc1ccc2ncnc(Nc3ccc(OC4CCN(C(=O)CC(C)(C)C)CC4)c(C)c3)c2c1	7.01773
CHEMBL4286374	96	nM	O=C(Nc1ccc2ncnc(Nc3cccc(Br)c3)c2c1)c1ccc(C(F)(F)F)cc1O	7.01773
CHEMBL3357642	97.1	nM	CN(C)C/C=C(/F)C(=O)Nc1cc2c(Nc3ccc(F)c(Cl)c3)ncnc2cc1O[C@H]1CCOC1	7.01278
CHEMBL497184	98	nM	CCO[C@H]1CN[C@H](C#Cc2cc3ncnc(Nc4ccc(OCc5cccc(F)c5)c(Cl)c4)c3s2)C1	7.00877
CHEMBL523076	99	nM	O=C(NO)[C@H]1CC(CC(=O)N2CCCC2)CC[C@@H]1C(=O)N1CCN(c2ccccc2)CC1	7.00436
CHEMBL3921652	100	nM	C[C@@H](Nc1ncnc2[nH]c(-c3ccc(NC(=O)CCCC(=O)NO)cc3)cc12)c1ccccc1	7
CHEMBL4237833	100	nM	CO[C@H]1/C=C\C=C(/C)C(=O)NC2=CC(=O)C(NCC#CCC[C@@H]3C[C@H]4[C@@H]5CCc6cc(O)ccc6[C@H]5CC[C@]4(C)[C@H]3O)=C(C[C@@H](C)C[C@H](OC)[C@H](O)[C@@H](C)/C=C(\C)[C@@H]1OC(N)=O)C2=O	7
CHEMBL3938265	100	nM	C[C@@H](Nc1ncnc2[nH]c(-c3ccc(CN4CCN(CCCCCC(=O)NO)CC4)cc3)cc12)c1ccccc1	7
CHEMBL3977186	100	nM	C[C@@H](Nc1ncnc2[nH]c(-c3ccc(OCCCC(=O)NO)cc3)cc12)c1ccccc1	7
CHEMBL3961102	100	nM	C[C@@H](Nc1ncnc2[nH]c(-c3ccc(NC(=O)CCC(=O)NO)cc3)cc12)c1ccccc1	7
CHEMBL3899385	100	nM	C[C@@H](Nc1ncnc2[nH]c(-c3ccc(OCCCCC(=O)NO)cc3)cc12)c1ccccc1	7
CHEMBL4475271	100	nM	CO[C@H]1/C=C\C=C(/C)C(=O)NC2=CC(=O)C(NC/C=C/C[C@@H]3C[C@H]4[C@@H]5CCc6cc(O)ccc6[C@H]5CC[C@]4(C)[C@H]3O)=C(C[C@@H](C)C[C@H](OC)[C@H](O)[C@@H](C)/C=C(\C)[C@@H]1OC(N)=O)C2=O	7
CHEMBL497222	100	nM	CN1CCN(C(=O)CC2CC[C@H](C(=O)N3CCN(c4ccccc4)CC3)[C@@H](C(=O)NO)C2)CC1	7
CHEMBL3924346	100	nM	C[C@@H](Nc1ncnc2[nH]c(-c3ccc(NC(=O)CCCCC(=O)NO)cc3)cc12)c1ccccc1	7
CHEMBL595615	100	nM	COc1cc2c(Nc3ccc(-c4nc5ccccc5s4)cc3)ncnc2cc1OCCCN1CCN(C)CC1	7
CHEMBL3902161	100	nM	C[C@@H](Nc1ncnc2[nH]c(-c3ccc(OCCCCCC(=O)NO)cc3)cc12)c1ccccc1	7
CHEMBL384711	100	nM	CS(=O)(=O)CCNCc1ccc(-c2ccc3ncnc(Nc4ccc(OCc5cccc(Br)c5)cc4)c3c2)o1	7
CHEMBL521719	100	nM	O=C(NO)[C@H]1CC2(CC[C@@H]1C(=O)N1CCN(c3ccccc3)CC1)CC2	7
CHEMBL3972249	100	nM	C[C@@H](Nc1ncnc2[nH]c(-c3ccc(CN4CCN(CCCCC(=O)NO)CC4)cc3)cc12)c1ccccc1	7
CHEMBL230994	100	nM	COc1cc2ncnc(Nc3ccc(OC4CCN(C(=O)CC(C)(C)C)CC4)c(C)c3)c2cc1OC	7
CHEMBL4246725	100	nM	CO[C@H]1/C=C\C=C(/C)C(=O)NC2=CC(=O)C(NC/C=C/CCC[C@@H]3C[C@H]4[C@@H]5CCc6cc(O)ccc6[C@H]5CC[C@]4(C)[C@H]3O)=C(C[C@@H](C)C[C@H](OC)[C@H](O)[C@@H](C)/C=C(\C)[C@@H]1OC(N)=O)C2=O	7
CHEMBL3901144	100	nM	C#Cc1cccc(Nc2ncnc3cc(OC)c(NC(=O)CCCCCCC(=O)NO)cc23)c1	7
CHEMBL516487	100	nM	COC(=O)c1c(N)ncnc1Nc1ccc(OCc2ccccc2)c(Cl)c1	7
CHEMBL3959043	100	nM	C#Cc1cc(Nc2ncnc3cc(OC)c(OCCCCCCCC(=O)NO)cc23)ccc1F	7
CHEMBL3909900	100	nM	C#Cc1cc(Nc2ncnc3cc(OCCOC)c(OCCCCCCCC(=O)NO)cc23)ccc1F	7
CHEMBL3907491	100	nM	C[C@@H](Nc1ncnc2[nH]c(-c3ccc(CNCCC(=O)NO)cc3)cc12)c1ccccc1	7
CHEMBL3898444	100	nM	C#Cc1cccc(Nc2ncnc3cc(OCCCCCCC(=O)NO)c(OCCOC)cc23)c1	7
CHEMBL3901210	100	nM	COCCOc1cc2c(Nc3ccc(F)c(Cl)c3)ncnc2cc1OCCCCCCC(=O)NO	7
CHEMBL3952709	100	nM	C[C@@H](Nc1ncnc2[nH]c(-c3ccc(NC(=O)CCCCCCC(=O)NO)cc3)cc12)c1ccccc1	7
CHEMBL3951620	100	nM	C[C@@H](Nc1ncnc2[nH]c(-c3ccc(OCCCCCCC(=O)NO)cc3)cc12)c1ccccc1	7
CHEMBL3933895	100	nM	CCOc1cc2ncnc(Nc3ccc4c(ccn4S(=O)(=O)c4ccccc4)c3)c2cc1NC(=O)/C=C/CN1CCOCC1	7
CHEMBL2348419	100	nM	COC(=O)C1=Cc2c(ncnc2Nc2ccc(Oc3cccc(C(F)(F)F)c3)c(Cl)c2)NCC1	7
CHEMBL3914322	100	nM	C[C@@H](Nc1ncnc2[nH]c(-c3ccc(OCCCCCCC(=O)NO)cc3)cc12)c1ccc(F)cc1	7
CHEMBL3932057	100	nM	C[C@@H](Nc1ncnc2[nH]c(-c3ccc(NCc4ccc(C(=O)NO)cc4)cc3)cc12)c1ccccc1	7
CHEMBL201871	100	nM	COc1ccc(I)c(Sc2nc3c(N)ncnc3n2CCNCC(C)C)c1	7
CHEMBL3917105	100	nM	O=C(CCCCCN1CCN(Cc2ccc(-c3cc4c(NCc5ccccc5)ncnc4[nH]3)cc2)CC1)NO	7
CHEMBL3977504	100	nM	CN(C)C/C=C/C(=O)Nc1cc2c(Nc3ccc(Oc4ccccc4)cc3)ncnc2cn1	7
CHEMBL3898480	100	nM	C[C@@H](Nc1ncnc2[nH]c(-c3ccc(CNCCCCCCCC(=O)NO)cc3)cc12)c1ccccc1	7
CHEMBL3901236	100	nM	C[C@@H](Nc1ncnc2[nH]c(-c3ccc(CNCCCCCCC(=O)NO)cc3)cc12)c1ccccc1	7
CHEMBL3981584	100	nM	O=C(NO)c1ccc(-c2cc3c(NCc4ccccc4)ncnc3[nH]2)cc1	7
CHEMBL3968968	100	nM	C[C@@H](Nc1ncnc2[nH]c(-c3ccc(CNCc4ccc(C(=O)NO)cc4)cc3)cc12)c1ccccc1	7
CHEMBL3936547	100	nM	C[C@@H](Nc1ncnc2[nH]c(-c3ccc(CNCCCCCC(=O)NO)cc3)cc12)c1ccccc1	7
CHEMBL3984055	100	nM	C[C@@H](Nc1ncnc2[nH]c(-c3ccc(C(=O)NO)cc3)cc12)c1ccc(F)cc1	7
CHEMBL3905131	100	nM	C[C@@H](Nc1ncnc2[nH]c(-c3ccc(C(=O)NCCNCCCCCC(=O)NO)cc3)cc12)c1ccccc1	7
CHEMBL3950023	100	nM	C[C@@H](Nc1ncnc2[nH]c(-c3ccc(NC(=O)CCNCC(=O)NO)cc3)cc12)c1ccccc1	7
CHEMBL3984573	100	nM	C[C@@H](Nc1ncnc2[nH]c(-c3ccc(C(=O)NCCNCCC(=O)NO)cc3)cc12)c1ccccc1	7
CHEMBL3917093	100	nM	C[C@@H](Nc1ncnc2c1cc(-c1ccc(C(=O)NCCNCCCCCCC(=O)NO)cc1)n2C)c1ccccc1	7
CHEMBL3939306	100	nM	C[C@@H](Nc1ncnc2[nH]c(-c3ccc(C(=O)NCCNCCCCCCC(=O)NO)cc3)cc12)c1ccccc1	7
CHEMBL1683969	102	nM	CCN1CCN(C(=O)/C(F)=C/c2c(C)ncnc2Nc2ccc(OCc3cccc(F)c3)c(Cl)c2)CC1	6.9914
CHEMBL3896779	102	nM	O=C(/C=C/CN1CCCC1)Nc1cc2c(Nc3ccc(Oc4ccccc4)cc3)ncnc2cn1	6.9914
CHEMBL496211	102	nM	CN1CC(CC(=O)N2CCCCC2)C[C@H](C(=O)NO)[C@H]1C(=O)N1CCN(c2ccccc2)CC1	6.9914
CHEMBL4582195	104	nM	O=C(CSC(=S)N1CCCCC1)Nc1cccc(NC(=O)c2ccccn2)c1	6.98297
CHEMBL4642574	104	nM	N#Cc1cnc2cc(OC[C@H](O)CO)c(NC(=O)CC3CSSC3)cc2c1Nc1ccc(OCc2cccc(F)c2)c(Cl)c1	6.98297
CHEMBL438536	107	nM	Cc1cc(Nc2ncnc3[nH]nc(OCCN4CCC(O)CC4)c23)ccc1OCc1cccc(F)c1	6.97062
CHEMBL218677	107	nM	COc1cc2ncnc(Nc3cccc(Cl)c3F)c2cc1OC1CCN(CC(N)=O)CC1	6.97062
CHEMBL5204417	108	nM	CC(=O)NNC(=O)c1csc2ncc(-c3ccc(Br)cc3)n12	6.96658
CHEMBL429827	110	nM	Cc1ccn2ncnc(Nc3ccc4c(cnn4Cc4ccccc4)c3)c12	6.95861
CHEMBL523573	110	nM	COCCN1CCC[C@@H]1C#Cc1cc2ncnc(Nc3ccc(OCc4cccc(F)c4)c(Cl)c3)c2s1	6.95861
CHEMBL246694	110	nM	NC(=O)COCc1ccn2ncnc(Nc3ccc4c(cnn4Cc4cccc(F)c4)c3)c12	6.95861
CHEMBL246276	110	nM	OCc1ccn2ncnc(Nc3ccc4c(cnn4Cc4cccc(F)c4)c3)c12	6.95861
CHEMBL391521	110	nM	CN(CCO)Cc1ccn2ncnc(Nc3ccc4c(cnn4Cc4cccc(F)c4)c3)c12	6.95861
CHEMBL234772	110	nM	O=C(O)C1CCN(Cc2ccn3ncnc(Nc4ccc5c(cnn5Cc5cccc(F)c5)c4)c23)CC1	6.95861
CHEMBL247309	110	nM	CN(C)C1CCN(Cc2ccn3ncnc(Nc4ccc5c(cnn5Cc5cccc(F)c5)c4)c23)CC1	6.95861
CHEMBL140561	110	nM	CN(C)CCCOC(=O)/C=C/C(=O)Nc1ccc2ncnc(Nc3cccc(Br)c3)c2c1	6.95861
CHEMBL194958	110	nM	CCc1c(C(N)=O)cn2ncnc(Nc3ccc4c(cnn4Cc4ccccc4)c3)c12	6.95861
CHEMBL1934629	110	nM	Cc1ncnc(Nc2ccc(OCc3cccc(F)c3)c(Cl)c2)c1C#Cc1ncc(CN2CCCC2)s1	6.95861
CHEMBL480348	111	nM	CCNCc1ccc(-c2cc3c(Nc4ccc(OCc5cccc(F)c5)c(Cl)c4)ncnc3s2)[nH]1	6.95468
CHEMBL3092308	112	nM	O=C(NCCN1CCCC1)Nc1cc2c(Nc3ccc(F)c(Cl)c3)ncnc2cc1O[C@H]1CCOC1	6.95078
CHEMBL91811	113	nM	CC(C)N(C)CC#CC(=O)Nc1ccc2ncnc(Nc3cccc(Br)c3)c2c1	6.94692
CHEMBL473427	113	nM	Fc1cccc(COc2ccc(Nc3ncnc4cc(-c5cccs5)sc34)cc2Cl)c1	6.94692
CHEMBL475446	113	nM	CS(=O)(=O)CCNCc1ccc(-c2cc3ncnc(Nc4ccc(OCc5cccc(F)c5)c(Cl)c4)c3s2)[nH]1	6.94692
CHEMBL388978	115	nM	CN[C@@H]1C[C@H]2O[C@@](C)([C@@H]1OC)n1c3ccccc3c3c4c(c5c6ccccc6n2c5c31)C(=O)NC4	6.9393
CHEMBL327838	116	nM	COCCOCC#CC(=O)Nc1ccc2ncnc(Nc3cccc(Br)c3)c2c1	6.93554
CHEMBL93784	117	nM	COCC1CCCN1CC#CC(=O)Nc1ccc2ncnc(Nc3cccc(Br)c3)c2c1	6.93181
CHEMBL14627	117	nM	O=C(NCCCCOc1ccc2ncnc(Nc3ccc(OCc4ccccc4)cc3)c2c1)C(F)(F)F	6.93181
CHEMBL525725	118	nM	COc1ccc(/N=C/c2c(N)ncnc2Nc2ccc3c(cnn3Cc3cccc(F)c3)c2)cc1	6.92812
CHEMBL497803	120	nM	COC(=O)N1CCC[C@@H]1C#Cc1cc2ncnc(Nc3ccc(OCc4cccc(F)c4)c(Cl)c3)c2s1	6.92082
CHEMBL1922904	120	nM	FC(F)(F)c1ccccc1Oc1ccc(Nc2ncnc3cc[nH]c23)cc1Cl	6.92082
CHEMBL258353	120	nM	CN(CCO)C(=O)COc1cccc2ncnc(Nc3ccc(OCc4ccccn4)c(Cl)c3)c12	6.92082
CHEMBL247513	120	nM	O=C(CO)NC1CCN(Cc2ccn3ncnc(Nc4ccc5c(cnn5Cc5cccc(F)c5)c4)c23)CC1	6.92082
CHEMBL452768	120	nM	O=C(O[C@H]1CN[C@H](C#Cc2cc3ncnc(Nc4ccc5c(ccn5S(=O)(=O)c5ccsc5)c4)c3s2)C1)N1CCOCC1	6.92082
CHEMBL257477	120	nM	COCCN(C)C(=O)[C@@H](C)Oc1cccc2ncnc(Nc3ccc(Oc4ccc(C)nc4)c(C)c3)c12	6.92082
CHEMBL3945555	120	nM	O=C(CBr)OCCn1c(=O)oc2cc3ncnc(Nc4ccc(Oc5cccc(C(F)(F)F)c5)c(Cl)c4)c3cc21	6.92082
CHEMBL234577	120	nM	CN1CCCN(Cc2ccn3ncnc(Nc4ccc5c(cnn5Cc5cccc(F)c5)c4)c23)CC1	6.92082
CHEMBL400413	120	nM	CS(=O)(=O)N1CCCN(Cc2ccn3ncnc(Nc4ccc5c(cnn5Cc5cccc(F)c5)c4)c23)CC1	6.92082
CHEMBL246072	120	nM	Fc1cccc(Cn2ncc3cc(Nc4ncnn5ccc(COCC6CCNCC6)c45)ccc32)c1	6.92082
CHEMBL396204	120	nM	COCCOc1ccc2ncnc(Nc3ccc(OC4CCN(C(=O)CC(C)(C)C)CC4)c(C)c3)c2c1	6.92082
CHEMBL1934631	120	nM	Cc1ncnc(Nc2ccc(OCc3cccc(F)c3)c(Cl)c2)c1/C=C/c1ccc(CNCCS(C)(=O)=O)cc1	6.92082
CHEMBL2408046	120	nM	CCNC(=O)CN1CCC(Oc2cc3c(Nc4cccc(Cl)c4F)ncnc3cc2OC)CC1	6.92082
CHEMBL232082	120	nM	CN1CCN(Cc2ccn3ncnc(Nc4ccc5c(cnn5Cc5cccc(F)c5)c4)c23)CC1	6.92082
CHEMBL473436	121	nM	Fc1cccc(COc2ccc(Nc3ncnc4cc(-c5ccc[nH]5)sc34)cc2Cl)c1	6.91721
CHEMBL4646030	121	nM	N#Cc1cnc2cc(OC[C@@H](O)CO)c(NC(=O)CC3CSSC3)cc2c1Nc1ccc(OCc2cccc(F)c2)c(Cl)c1	6.91721
CHEMBL5204650	121	nM	NNC(=O)c1csc2nc(CN3CCOCC3)c(-c3ccc(Br)cc3)n12	6.91721
CHEMBL473428	122	nM	OCc1ccc(-c2cc3ncnc(Nc4ccc(OCc5cccc(F)c5)c(Cl)c4)c3s2)o1	6.91364
CHEMBL93049	122	nM	COCOCC#CC(=O)Nc1ccc2ncnc(Nc3cccc(Br)c3)c2c1	6.91364
CHEMBL3977326	124	nM	CCC(=O)Nc1cc2c(Nc3ccc4c(ccn4Cc4ccccc4)c3)ncnc2cc1OC	6.90658
CHEMBL328977	124	nM	O=C(C#CCN1CCSCC1)Nc1ccc2ncnc(Nc3cccc(Br)c3)c2c1	6.90658
CHEMBL31816	125	nM	C=CC(=O)Nc1nc2c(Nc3ccc(F)c(Cl)c3)ncnc2cc1OC	6.90309
CHEMBL3633932	126	nM	CCNC(=O)Nc1ccc2ncnc(Nc3ccc(OCc4cccc(F)c4)c(Cl)c3)c2c1	6.89963
CHEMBL3914227	128	nM	CCOc1cc2ncnc(Nc3ccc4c(cnn4Cc4ccccc4)c3)c2cc1NC(=O)/C=C/CN1[C@H](C)CCC[C@@H]1C	6.89279
CHEMBL258270	129	nM	CC(=O)N1CCN(CCOc2n[nH]c3ncnc(Nc4ccc(OCc5ccccn5)c(Cl)c4)c23)CC1	6.88941
CHEMBL503253	130	nM	CC(c1cccc(F)c1)n1ncc2cc(Nc3ncnc4cc(C#C[C@@H]5C[C@@H](OC(=O)N6CCOCC6)CN5)sc34)ccc21	6.88606
CHEMBL593306	130	nM	COc1ccc2nc(-c3ccc(Nc4ncnc5cc(OCCCN6CCN(C)CC6)c(OC)cc45)cc3)sc2c1	6.88606
CHEMBL197689	130	nM	CCc1c(C(=O)NC)cn2ncnc(Nc3ccc4c(cnn4Cc4ccccc4)c3)c12	6.88606
CHEMBL255337	130	nM	Cc1ccc(Oc2ccc(Nc3ncnc4cccc(OCC(=O)N(C)CCO)c34)cc2C)cn1	6.88606
CHEMBL228977	130	nM	Cc1cc(Nc2ncnc3cnc(N4CCN(C)CC4)cc23)ccc1Oc1ccc(C(=O)NCC(C)(C)C)cc1	6.88606
CHEMBL2048792	130	nM	O=C1Cc2ccc(Oc3ccc(Nc4ncnc5ccn(CCO)c45)cc3Cl)cc2N1	6.88606
CHEMBL256996	130	nM	C[C@H](Oc1cccc2ncnc(Nc3ccc4c(cnn4Cc4cscn4)c3)c12)C(=O)N(C)C	6.88606
CHEMBL245867	130	nM	NCCCCOCc1ccn2ncnc(Nc3ccc4c(cnn4Cc4cccc(F)c4)c3)c12	6.88606
CHEMBL389741	130	nM	COCC(=O)NCC#Cc1ccc2ncnc(Nc3ccc(Oc4cccc(C(=O)NCC(C)(C)C)c4)c(C)c3)c2c1	6.88606
CHEMBL394495	130	nM	C[C@H](c1ccccc1)n1ncc2cc(Nc3ncnn4ccc(COC[C@@H]5CNCCO5)c34)ccc21	6.88606
CHEMBL1934630	130	nM	Cc1ncnc(Nc2ccc(OCc3cccc(F)c3)c(Cl)c2)c1C#CCOc1ccc(CNC(C)C)cc1	6.88606
CHEMBL1336	131	nM	CNC(=O)c1cc(Oc2ccc(NC(=O)Nc3ccc(Cl)c(C(F)(F)F)c3)cc2)ccn1	6.88273
CHEMBL4592101	131.6	nM	CCCOCCOc1cc2ncnc(Nc3ccc(F)c(Cl)c3)c2cc1NC(=O)/C=C/CN(C)C	6.88074
CHEMBL500640	135	nM	CCOC(=O)O[C@H]1CN[C@H](C#Cc2cc3ncnc(Nc4ccc(OCc5cccc(F)c5)c(Cl)c4)c3s2)C1	6.86967
CHEMBL1928946	135	nM	CC(=O)Nc1cccc(Oc2cc(Nc3ccc(OCc4cccc(F)c4)c(Cl)c3)ncn2)c1	6.86967
CHEMBL445717	137	nM	O=C(CC1CN[C@H](C(=O)N2CCC(c3ccccc3)C2)[C@@H](C(=O)NO)C1)NCCCCCNC(=O)OCc1ccccc1	6.86328
CHEMBL228627	140	nM	COCC(=O)NCC#Cc1ccc2ncnc(Nc3ccc(Oc4cccc(C(=O)Nc5ccccc5)c4)c(C)c3)c2c1	6.85387
CHEMBL258354	140	nM	O=C(COc1cccc2ncnc(Nc3ccc(OCc4ccccn4)c(Cl)c3)c12)N1CCOCC1	6.85387
CHEMBL413997	140	nM	C[C@H](Oc1cccc2ncnc(Nc3ccc4c(cnn4Cc4ccccn4)c3)c12)C(=O)N1CCOCC1	6.85387
CHEMBL257196	140	nM	C[C@@H](Oc1cccc2ncnc(Nc3ccc4c(cnn4Cc4cscn4)c3)c12)C(N)=O	6.85387
CHEMBL391437	140	nM	c1ccc2c(-c3cnc4[nH]nc(-c5nc6ccccc6[nH]5)c4c3)cncc2c1	6.85387
CHEMBL1934627	140	nM	Cc1ncnc(Nc2ccc(OCc3cccc(F)c3)c(Cl)c2)c1C#Cc1ccc(CN2CCCC2)o1	6.85387
CHEMBL395591	140	nM	Fc1cccc(Cn2ncc3cc(Nc4ncnn5ccc(COCC6CNCCOC6)c45)ccc32)c1	6.85387
CHEMBL229037	140	nM	COCC(=O)NCC#Cc1ccc2ncnc(Nc3ccc(Oc4ccc(C(=O)NCC(C)(C)C)cc4)c(C)c3)c2c1	6.85387
CHEMBL438440	140	nM	Fc1cccc(COc2ccc(Nc3ncncc3C#Cc3cccnc3)cc2Cl)c1	6.85387
CHEMBL199532	140	nM	COc1ccc(I)c(Sc2nc3c(N)ncnc3n2CCCNC(C)(C)C)c1	6.85387
CHEMBL1683955	140	nM	Cc1ncnc(Nc2ccc(OCc3cccc(F)c3)c(Cl)c2)c1C	6.85387
CHEMBL445572	141	nM	CS(=O)(=O)CCN(Cc1ccccc1)Cc1ccc(-c2ccc3ncnc(Nc4ccc(OCc5cccc(F)c5)c(Cl)c4)c3c2)o1	6.85078
CHEMBL377250	141	nM	[O-][S+]1CCN(Cc2ccc(-c3ccc4ncnc(Nc5ccc(OCc6cccc(F)c6)c(C(F)(F)F)c5)c4c3)o2)CC1	6.85078
CHEMBL5194543	146	nM	Cc1ccc(-c2c(CN3CCCCC3)nc3scc(C(=O)O)n23)cc1	6.83565
CHEMBL511478	146	nM	NNC(=O)c1c(N)ncnc1Nc1ccc(OCc2ccccc2)c(Cl)c1	6.83565
CHEMBL4785221	146	nM	C=CC(=O)Nc1cccc(-c2c(-c3ccc(N4CCN(C)CC4)cc3)[nH]c3ncn(C)c(=O)c23)c1	6.83565
CHEMBL475594	146	nM	CN(C)Cc1ccc(-c2cc3ncnc(Nc4ccc(OCc5cccc(F)c5)c(Cl)c4)c3s2)o1	6.83565
CHEMBL460732	147	nM	CS(=O)(=O)CCNCCCCOc1ccc2ncnc(Nc3ccc(S(=O)(=O)c4ccccc4)cc3)c2c1	6.83268
CHEMBL270448	148	nM	Clc1cc(Nc2ncnc3[nH]nc(OCCN4CCCCCO4)c23)ccc1OCc1ccccn1	6.82974
CHEMBL4577883	148.3	nM	COC[C@@H](C)Oc1cc2ncnc(Nc3ccc(F)c(Cl)c3)c2cc1NC(=O)/C=C/CN(C)C	6.82886
CHEMBL3357641	149.4	nM	CN(C)C/C=C(\F)C(=O)Nc1cc2c(Nc3ccc(F)c(Cl)c3)ncnc2cc1O[C@H]1CCOC1	6.82565
CHEMBL1090363	150	nM	CN(C)CCc1cccc(Nc2nccc(-c3c(-c4cccc(NC(=O)Cc5ccccc5)c4)nc4sccn34)n2)c1	6.82391
CHEMBL230574	150	nM	COCC(=O)NCC#Cc1ccc2ncnc(Nc3ccc(OC4CCN(C(=O)C5CCC5)CC4)c(C)c3)c2c1	6.82391
CHEMBL1683961	150	nM	Cc1ncnc(Nc2ccc(OCc3cccc(F)c3)c(Cl)c2)c1C#CCCCN1CCOCC1	6.82391
CHEMBL2048793	150	nM	O=C1NCc2c(Oc3ccc(Nc4ncnc5ccn(CCO)c45)cc3Cl)cccc21	6.82391
CHEMBL3344217	152	nM	CCC(=O)ON[C@H](CS(C)(=O)=O)c1ccc(-c2ccc3ncnc(Nc4ccc(OCc5cccc(F)c5)c(Cl)c4)c3c2)o1	6.81816
CHEMBL3948084	153	nM	CCC(=O)Nc1cc2c(Nc3ccc4c(cnn4Cc4ccccc4)c3)ncnc2cc1OC	6.81531
CHEMBL481331	153	nM	CS(=O)(=O)CCNCc1ccc(-c2cc3c(Nc4ccc(OCc5cccc(F)c5)c(Cl)c4)ncnc3s2)[nH]1	6.81531
CHEMBL257815	153	nM	CO/N=C/c1c(N)ncnc1Nc1ccc(OCc2ccccc2)c(Cl)c1	6.81531
CHEMBL3344219	158.2	nM	CCCCCCC(=O)ON[C@H](CS(C)(=O)=O)c1ccc(-c2ccc3ncnc(Nc4ccc(OCc5cccc(F)c5)c(Cl)c4)c3c2)o1	6.80079
CHEMBL4060320	160	nM	NP(=O)(OCCCCCOc1ccc2ncnc(Nc3cccc(Br)c3)c2c1)N(CCCl)CCCl	6.79588
CHEMBL205047	160	nM	OCc1nc(C#Cc2cncnc2Nc2ccc(OCc3cccc(F)c3)c(Cl)c2)cs1	6.79588
CHEMBL404327	160	nM	C[C@@H](Oc1cccc2ncnc(Nc3ccc4c(cnn4Cc4cscn4)c3)c12)C(=O)N1CCOCC1	6.79588
CHEMBL4457447	160	nM	CCOc1cc2ncc(C#N)c(Nc3ccc(OCc4cccc(F)c4)c(Cl)c3)c2cc1NC(=O)CC1CCSS1	6.79588
CHEMBL1090361	160	nM	CN1CCc2cc(Nc3nccc(-c4c(-c5cccc(NC(=O)Cc6ccccc6)c5)nc5sccn45)n3)ccc2C1	6.79588
CHEMBL495797	162	nM	NCCCCCNC(=O)CC1CN[C@H](C(=O)N2CCC(c3ccccc3)C2)[C@@H](C(=O)NO)C1	6.79048
CHEMBL568356	162	nM	NCCCCNC(=O)CC1CN[C@H](C(=O)N2CCC(c3ccccc3)C2)[C@@H](C(=O)NO)C1	6.79048
CHEMBL92961	162	nM	CC(C)N(CC#CC(=O)Nc1ccc2ncnc(Nc3cccc(Br)c3)c2c1)C(C)C	6.79048
CHEMBL3344218	163.8	nM	CCCCC(=O)ON[C@H](CS(C)(=O)=O)c1ccc(-c2ccc3ncnc(Nc4ccc(OCc5cccc(F)c5)c(Cl)c4)c3c2)o1	6.78569
CHEMBL4798527	165	nM	Cc1ccc(NC(=O)c2ccc(C)c(C(F)(F)F)c2)cc1C#Cc1nn([C@H]2CC[C@H](O)CC2)c2ncnc(N)c12	6.78252
CHEMBL3920583	165.5	nM	O=C(CCCCCn1cc(-c2ccc3ncnc(Nc4ccc(F)c(Cl)c4)c3c2)nn1)NO	6.7812
CHEMBL4517633	167	nM	N#Cc1cnc2cc(OC[C@@H](O)CO)c(NC(=O)C3CSSC3)cc2c1Nc1ccc(OCc2cccc(F)c2)c(Cl)c1	6.77728
CHEMBL247711	170	nM	COc1cn2ncnc(Nc3ccc4c(cnn4Cc4cccc(F)c4)c3)c2c1CN1CCCNCC1	6.76955
CHEMBL496629	170	nM	O=C(NO)[C@H]1C[C@H](CC(=O)N2CCCCC2)CC[C@@H]1C(=O)N1CCN(c2ccccc2)CC1	6.76955
CHEMBL1090354	170	nM	O=C(Nc1ccccc1)Nc1cccc(-c2nc3sccn3c2-c2ccnc(Nc3ccc(N4CCOCC4)cc3)n2)c1	6.76955
CHEMBL5199520	170	nM	NS(=O)(=O)c1ccc(CCn2c(SCC(=O)Nc3ccc(Cl)cc3)nc3ccccc3c2=O)cc1	6.76955
CHEMBL1090355	170	nM	O=C(Nc1cccc(-c2nc3sccn3c2-c2ccnc(Nc3ccc(N4CCOCC4)cc3)n2)c1)Oc1ccccc1	6.76955
CHEMBL246073	170	nM	Fc1cccc(Cn2ncc3cc(Nc4ncnn5ccc(COC[C@H]6CCCNC6)c45)ccc32)c1	6.76955
CHEMBL1090362	170	nM	CCN1CCN(c2ccc(Nc3nccc(-c4c(-c5cccc(NC(=O)Cc6ccccc6)c5)nc5sccn45)n3)cc2)CC1	6.76955
CHEMBL372523	170	nM	CCc1c(NC(=O)OCc2ccccc2)cn2ncnc(Nc3ccc4c(cnn4Cc4ccccc4)c3)c12	6.76955
CHEMBL392774	170	nM	COC1CNCCN(Cc2ccn3ncnc(Nc4ccc5c(cnn5Cc5cccc(F)c5)c4)c23)C1	6.76955
CHEMBL430031	173	nM	CC(C)CO/N=C/c1c(N)ncnc1Nc1ccc2c(cnn2Cc2cccc(F)c2)c1	6.76195
CHEMBL3957416	174	nM	CCOc1cc2ncnc(Nc3ccc(NS(=O)(=O)c4ccccc4)cc3)c2cc1NC(=O)/C=C/CN1CCOCC1	6.75945
CHEMBL3930620	174.9	nM	O=C(CCCCCCn1cc(-c2ccc3ncnc(Nc4cccc(Cl)c4F)c3c2)nn1)NO	6.75721
CHEMBL598406	175	nM	COc1cc2ncnc(N[C@@H](C)c3ccc(F)cc3)c2cc1OCCCCCCC(=O)NO	6.75696
CHEMBL3957055	176.7	nM	O=C(CCCCCCn1cc(-c2ccc3ncnc(Nc4ccc(F)c(Cl)c4)c3c2)nn1)NO	6.75276
CHEMBL328245	177	nM	CCCN(CC#CC(=O)Nc1ccc2ncnc(Nc3cccc(Br)c3)c2c1)CCC	6.75203
CHEMBL272929	180	nM	NC(=O)COc1cccc2ncnc(Nc3ccc(OCc4ccccn4)c(Cl)c3)c12	6.74473
CHEMBL247512	180	nM	CC(=O)NC1CCN(Cc2ccn3ncnc(Nc4ccc5c(cnn5Cc5cccc(F)c5)c4)c23)CC1	6.74473
CHEMBL604893	180	nM	COc1cc2ncnc(Nc3ccc(-c4nc5ccccc5s4)c(Cl)c3)c2cc1OCCCN1CCN(C)CC1	6.74473
CHEMBL451347	180	nM	O=C(O[C@H]1CN[C@H](C#Cc2cc3ncnc(Nc4ccc5c(ccn5Cc5cscn5)c4)c3s2)C1)N1CCOCC1	6.74473
CHEMBL3936642	180	nM	O=C(CBr)OCCn1c(=O)oc2cc3ncnc(Nc4ccc(OCc5cccc(F)c5)c(Cl)c4)c3cc21	6.74473
CHEMBL1934628	180	nM	Cc1ncnc(Nc2ccc(OCc3cccc(F)c3)c(Cl)c2)c1C#Cc1ccc(CN2CCCC2)s1	6.74473
CHEMBL4084847	180	nM	NP(=O)(OCCOc1ccc2ncnc(Nc3cccc(Br)c3)c2c1)N(CCCl)CCCl	6.74473
CHEMBL196925	180	nM	CCOC(=O)c1cn2ncnc(Nc3ccc4c(cnn4Cc4ccccc4)c3)c2c1CC	6.74473
CHEMBL381521	180	nM	COc1ccc(I)c(Sc2nc3c(N)ncnc3n2CCCNC(C)C)c1	6.74473
CHEMBL116853	180	nM	COc1cc2ncc(C#N)c(Nc3cccc(Br)c3)c2cc1NC(=O)C#CCN(C)C	6.74473
CHEMBL2311747	180	nM	Brc1ccc(C2=NN(c3nc(-c4ccc(Br)cc4)cs3)C(c3ccc4c(c3)OCO4)C2)cc1	6.74473
CHEMBL505463	180	nM	O=C(O[C@H]1CN[C@H](C#Cc2cc3ncnc(Nc4ccc(Oc5ccnc6ccc(F)cc56)c(Cl)c4)c3s2)C1)N1CCOCC1	6.74473
CHEMBL284326	182	nM	C=CC(=O)Nc1nc2c(Nc3ccc(F)c(Cl)c3)ncnc2cc1OCCCN1CCN(C)CC1	6.73993
CHEMBL92356	183	nM	CCN1CCN(CC#CC(=O)Nc2ccc3ncnc(Nc4cccc(Br)c4)c3c2)CC1	6.73755
CHEMBL255170	184	nM	Cc1ccc(Oc2ccc(Nc3ncnc4[nH]nc(OCCN5CCC(O)CC5)c34)cc2Cl)cn1	6.73518
CHEMBL249496	186	nM	Nc1ncnc2c1c(-c1ccc3nc(Cc4ccccc4)[nH]c3c1)nn2[C@H]1CC[C@H](N2CCOCC2)CC1	6.73049
CHEMBL4763660	188	nM	C=CC(=O)Nc1cc(-c2c[nH]c3ncnc(Nc4ccc5[nH]c(Cc6ccccc6)nc5c4)c23)ccc1OCCO	6.72584
CHEMBL31656	189	nM	C=CC(=O)Nc1nc2c(Nc3ccc(F)c(Cl)c3)ncnc2cc1OCCCN1CCOCC1	6.72354
CHEMBL256527	189	nM	CO/N=C/c1c(N)ncnc1Nc1ccc2c(cnn2Cc2ccc(F)cc2)c1	6.72354
CHEMBL246898	190	nM	CS(=O)(=O)CCNC1CCN(Cc2ccn3ncnc(Nc4ccc5c(cnn5Cc5cccc(F)c5)c4)c23)CC1	6.72125
CHEMBL247916	190	nM	NC1CCN(Cc2ccn3ncnc(Nc4ccc5c(cnn5Cc5ccncc5)c4)c23)CC1	6.72125
CHEMBL1683964	190	nM	Cc1ncnc(Nc2ccc(OCc3cccc(F)c3)c(Cl)c2)c1/C=C/c1ccc(CN2CCOCC2)cc1	6.72125
CHEMBL4105530	190	nM	NP(=O)(OCCCCOc1ccc2ncnc(Nc3ccc(OCc4cccc(F)c4)c(Cl)c3)c2c1)N(CCCl)CCCl	6.72125
CHEMBL4079768	190	nM	C#Cc1cccc(Nc2ncnc3ccc(OCCCOP(N)(=O)N(CCCl)CCCl)cc23)c1	6.72125
CHEMBL3964033	192.8	nM	O=C(CCCCCn1cc(-c2ccc3ncnc(Nc4ccc(OCc5cccc(F)c5)c(Cl)c4)c3c2)nn1)NO	6.71489
CHEMBL496018	194	nM	CN1CC(CC(=O)N2CCCC2)C[C@H](C(=O)NO)[C@H]1C(=O)N1CCN(c2ccccc2)CC1	6.7122
CHEMBL1928948	196	nM	CCOC(=O)/C=C/C(=O)Nc1cccc(Oc2cc(Nc3ccc(OCc4cccc(F)c4)c(Cl)c3)ncn2)c1	6.70774
CHEMBL3971413	198	nM	CCOc1cc2ncnc(Nc3ccc4c(cnn4Cc4ccccc4)c3)c2cc1NC(=O)/C=C/CN1[C@H](C)CNC[C@@H]1C	6.70333
CHEMBL387207	200	nM	CS(=O)(=O)CCNCc1ccc(-c2ccc3ncnc(Nc4ccc(OCc5ccccc5)c(C(F)(F)F)c4)c3c2)o1	6.69897
CHEMBL271668	200	nM	Cc1ccc(Oc2ccc(Nc3ncnc4cccc(O[C@H](C)C(=O)NCCO)c34)cc2C)cn1	6.69897
CHEMBL483082	200	nM	Nc1nc(Nc2ccc(S(N)(=O)=O)cc2)nn1C(=O)c1sccc1-n1cccc1	6.69897
CHEMBL1257888	200	nM	CN1CCN([C@H]2CC[C@@H](n3nc(-c4ccc(Nc5nc6cccc(Cl)c6o5)cc4)c4c(N)ncnc43)CC2)CC1	6.69897
CHEMBL157084	200	nM	CS(=O)(=O)CCNc1nc(-c2ccc3ncnc(Nc4ccc(F)c(Cl)c4)c3c2)cs1	6.69897
CHEMBL196738	200	nM	CCOC(=O)c1cn2ncnc(Nc3ccc4c(cnn4Cc4ccccc4)c3)c2c1C	6.69897
CHEMBL3325477	200	nM	CCOC(=O)C1=C(N)N(c2cccnc2)C2=C(C(=O)CCC2)C1c1cc2ccccc2n2nnnc12	6.69897
CHEMBL181742	200	nM	Clc1cc(Nc2ncnc3nn4ccccc4c23)ccc1OCc1ccccc1	6.69897
CHEMBL265629	200	nM	O=C1CN(Cc2ccn3ncnc(Nc4ccc5c(cnn5Cc5cccc(F)c5)c4)c23)CCN1	6.69897
CHEMBL475600	203	nM	Fc1cccc(COc2ccc(Nc3ncnc4sc(-c5ccc[nH]5)cc34)cc2Cl)c1	6.6925
CHEMBL255490	204	nM	CO/N=C/c1c(N)ncnc1Nc1ccc(F)c(Cl)c1	6.69037
CHEMBL345109	207	nM	CN(C)CCCNC(=O)/C=C/C(=O)Nc1ccc2ncnc(Nc3cccc(Br)c3)c2c1	6.68403
CHEMBL496825	208	nM	O=C(NO)[C@H]1CC(CC(=O)N2CCOCC2)CC[C@@H]1C(=O)N1CCN(c2ccccc2)CC1	6.68194
CHEMBL381376	210	nM	CCC(C)NCCCn1c(Sc2cc(OC)ccc2I)nc2c(N)ncnc21	6.67778
CHEMBL201162	210	nM	CCC(CC)NCCCn1c(Sc2cc(OC)ccc2I)nc2c(N)ncnc21	6.67778
CHEMBL460731	210	nM	CS(=O)(=O)CCNCCCCOc1ccc2ncnc(Nc3ccc(F)c(Cl)c3)c2c1	6.67778
CHEMBL396287	210	nM	COCC(=O)NCC#Cc1ccc2ncnc(Nc3ccc(OC4CCN(C(=O)c5cccc(Cl)c5)CC4)c(C)c3)c2c1	6.67778
CHEMBL365606	210	nM	CCOC(=O)c1cn2ncnc(Nc3ccc4c(cnn4Cc4ccccc4)c3)c2c1C(C)C	6.67778
CHEMBL452980	210	nM	O=C(O[C@H]1CN[C@H](C#Cc2cc3ncnc(Nc4ccc5c(c4)c(F)cn5Cc4ccccc4)c3s2)C1)N1CCOCC1	6.67778
CHEMBL3680376	212.11	nM	COc1cc2ncnc(Nc3ccc(F)c(Cl)c3)c2cc1NC(=O)/C=C/CN1CCCC(F)C1	6.67344
CHEMBL1928949	219	nM	CCOC(=O)CNc1cccc(Oc2cc(Nc3ccc(OCc4cccc(F)c4)c(Cl)c3)ncn2)c1	6.65956
CHEMBL215814	220	nM	CS(=O)(=O)CCNCc1ccc(-c2ccc3ncnc(Nc4ccc(OCc5cccc(F)c5)c(C(F)(F)F)c4)c3c2)o1	6.65758
CHEMBL457250	220	nM	O=C(O[C@H]1CN[C@H](C#Cc2cc3ncnc(Nc4ccc(Sc5ccccn5)cc4)c3s2)C1)N1CCOCC1	6.65758
CHEMBL1934622	220	nM	Cc1ncnc(Nc2ccc(OCc3cccc(F)c3)c(Cl)c2)c1C#Cc1ccc(CNCCS(C)(=O)=O)cc1	6.65758
CHEMBL596761	225.2	nM	COc1cc2ncnc(NCc3ccccc3)c2cc1OCCCCCCC(=O)NO	6.64743
CHEMBL497032	226	nM	O=C(NO)[C@H]1CC(CC(=O)N2CC[C@@H](O)C2)CC[C@@H]1C(=O)N1CCN(c2ccccc2)CC1	6.64589
CHEMBL230786	230	nM	COCC(=O)NCC#Cc1ccc2ncnc(Nc3ccc(Oc4cccc(C(=O)NC5CCC5)c4)c(C)c3)c2c1	6.63827
CHEMBL387202	230	nM	CN1CC2(CC2)C[C@H](C(=O)NO)[C@H]1C(=O)N1CCN(c2ccccc2)CC1	6.63827
CHEMBL231099	230	nM	COCCOc1cc2ncnc(Nc3ccc(OC4CCN(C(=O)Nc5c(F)cccc5F)CC4)c(C)c3)c2cc1OCCOC	6.63827
CHEMBL3930270	230	nM	O=C(CCl)OCCn1c(=O)oc2cc3ncnc(Nc4ccc(Oc5cccc(C(F)(F)F)c5)c(Cl)c4)c3cc21	6.63827
CHEMBL2408209	230	nM	CNC(=O)CN1CCCC(Oc2cc3c(Nc4cccc(Cl)c4F)ncnc3cc2OC)C1	6.63827
CHEMBL256995	230	nM	C[C@@H](Oc1cccc2ncnc(Nc3ccc4c(cnn4Cc4cscn4)c3)c12)C(=O)N(C)C	6.63827
CHEMBL5171922	230	nM	FC(F)(F)c1ccc(/C=C/c2nc(CNc3cccc(Br)c3)co2)cc1	6.63827
CHEMBL3114700	230	nM	C#Cc1cccc(Nc2ncnc3cc4c(cc23)N(C(=O)/C=C/CN2CCCC2)CCO4)c1	6.63827
CHEMBL517907	234	nM	C#Cc1cccc(Nc2ncnc3ccc(OCCCCNCCS(C)(=O)=O)cc23)c1	6.63078
CHEMBL14952	234	nM	CS(=O)(=O)CCNCCCOc1ccc2ncnc(Nc3ccc(OCc4ccccc4)cc3)c2c1	6.63078
CHEMBL257410	240	nM	CNC(=O)[C@@H](C)Oc1cccc2ncnc(Nc3ccc4c(cnn4Cc4nccs4)c3)c12	6.61979
CHEMBL248890	240	nM	OCc1cccc2[nH]c(-c3n[nH]c4ncc(-c5cncc6ccccc56)cc34)nc12	6.61979
CHEMBL939	240	nM	COc1cc2ncnc(Nc3ccc(F)c(Cl)c3)c2cc1OCCCN1CCOCC1	6.61979
CHEMBL1091613	240	nM	O=C(Nc1cccc(-c2nc3sccn3c2-c2ccncc2)c1)c1ccccc1Cl	6.61979
CHEMBL4282506	240	nM	N#CCC(=O)N/N=C1\C(=O)Nc2ccc(S(=O)(=O)N3CCOCC3)cc21	6.61979
CHEMBL193368	240	nM	CCc1c(C(=O)OCCCn2ccnc2)cn2ncnc(Nc3ccc4c(cnn4Cc4ccccc4)c3)c12	6.61979
CHEMBL4070053	240	nM	NP(=O)(OCCCC(=O)Oc1ccc2ncnc(Nc3cccc(Br)c3)c2c1)N(CCCl)CCCl	6.61979
CHEMBL5176561	244	nM	CCC(=O)NNC(=O)c1csc2ncc(-c3ccc(C)cc3)n12	6.61261
CHEMBL3680374	244.39	nM	O=C(/C=C/CN1CCCCC1)Nc1cc2c(Nc3ccc(F)c(Cl)c3)ncnc2cc1OCC(F)F	6.61192
CHEMBL475767	246	nM	CN(C)Cc1ccc(-c2cc3c(Nc4ccc(OCc5cccc(F)c5)c(Cl)c4)ncnc3s2)[nH]1	6.60906
CHEMBL3680377	247.12	nM	COc1cc2ncnc(Nc3ccc(F)c(Cl)c3)c2cc1NC(=O)/C=C/CN1CCC(F)CC1	6.60709
CHEMBL2408047	250	nM	COCCNC(=O)CN1CCC(Oc2cc3c(Nc4cccc(Cl)c4F)ncnc3cc2OC)CC1	6.60206
CHEMBL3114687	250	nM	C#Cc1cccc(Nc2ncnc3cc4c(cc23)N(C(=O)/C=C/CN(CC)CC)CCO4)c1	6.60206
CHEMBL291126	250	nM	O=C1NC(=O)c2c1c1c3ccccc3n3c1c1c2c2ccccc2n1[C@@H]1O[C@H]3C[C@@H]1CO	6.60206
CHEMBL5196657	250	nM	FC(F)(F)c1ccc(/C=C/c2nc(Cn3ccc4cc(-c5cccc(Br)c5)ccc43)co2)cc1	6.60206
CHEMBL3114690	250	nM	C#Cc1cccc(Nc2ncnc3cc4c(cc23)N(C(=O)/C=C/CN(C)C)CCO4)c1	6.60206
CHEMBL395883	250	nM	COc1cn2ncnc(Nc3ccc4c(cnn4Cc4cccc(F)c4)c3)c2c1COC[C@@H]1CNCCO1	6.60206
CHEMBL394463	250	nM	Cc1ccn2ncnc(Nc3ccc4c(cnn4Cc4cccnc4)c3)c12	6.60206
CHEMBL475761	250	nM	CN1CCN(Cc2ccc(-c3cc4ncnc(Nc5ccc(OCc6cccc(F)c6)c(Cl)c5)c4s3)o2)CC1	6.60206
CHEMBL5187375	250	nM	Cc1nn(-c2ccc(F)cc2)c2c(Nc3ccc(F)c(Cl)c3)ncnc12	6.60206
CHEMBL248877	250	nM	Nc1ncnc2c1c(-c1ccc3nc(Cc4cccs4)[nH]c3c1)nn2[C@H]1CC[C@H](N2CCOCC2)CC1	6.60206
CHEMBL2408210	250	nM	CNC(=O)CN1CCC(Oc2cc3c(Nc4cccc(Cl)c4F)ncnc3cc2OC)C1	6.60206
CHEMBL4561606	250	nM	O=C(/C=C/CN1CCCC1)N1CCOc2cc3ncnc(Nc4ccc(F)c(Cl)c4)c3cc21	6.60206
CHEMBL4792279	254	nM	Cc1nn(-c2ccc(F)cc2)c2ncnc(Nc3ccc(F)c(Cl)c3)c12	6.59517
CHEMBL257814	255	nM	CO/N=C/c1c(N)ncnc1Nc1ccc2c(c1)CCN2Cc1cccc(F)c1	6.59346
CHEMBL227103	260	nM	COCCOc1cc2ncnc(Nc3ccc(OC4CCN(C(=O)CC(C)(C)C)CC4)c(C)c3)c2cc1OCCOC	6.58503
CHEMBL452716	260	nM	O=C(O[C@H]1CN[C@H](C#Cc2cc3ncnc(Nc4ccc5c(Oc6ccccn6)cccc5c4)c3s2)C1)N1CCOCC1	6.58503
CHEMBL4447976	261.8	nM	CCOCCOc1cc2ncnc(Nc3ccc(OCc4cccc(F)c4)c(Cl)c3)c2cc1NC(=O)/C=C/CN(C)C	6.58203
CHEMBL14932	263	nM	Oc1ccc2ncnc(Nc3ccc(OCc4ccccc4)cc3)c2c1	6.58004
CHEMBL2408050	264	nM	CNC(=O)CN1CCC(Oc2cc3c(Nc4ccc(F)c(Cl)c4)ncnc3cc2OC)CC1	6.5784
CHEMBL4752700	268	nM	C=CC(=O)Nc1ccc2nccc(Oc3ccc(C(=O)Nc4cc(CC)ccn4)cc3)c2c1	6.57187
CHEMBL503638	270	nM	CCOC(=O)N1CCN([C@H]2CC[C@H](n3nc(-c4ccc5nc(Cc6ccccc6OC)[nH]c5c4)c4c(N)ncnc43)CC2)CC1	6.56864
CHEMBL3633940	275	nM	NC(=O)Nc1ccc(C(=O)Nc2ccc3ncnc(Nc4ccc(F)c(Cl)c4)c3c2)cc1	6.56067
CHEMBL3977926	278	nM	CCOc1cc2ncnc(Nc3ccc(OCc4ccccn4)cc3)c2cc1NC(=O)/C=C/CN1CCCC1	6.55596
CHEMBL103005	280	nM	Cc1cc(Nc2ncnc3cnc(NCCN4CCOCC4)cc23)ccc1Oc1ccc(C(=O)NCC(C)(C)C)cc1	6.55284
CHEMBL191635	280	nM	C#CCCCn1c(Sc2cc(OC)ccc2I)nc2c(N)ncnc21	6.55284
CHEMBL246491	280	nM	COC(=O)COCc1ccn2ncnc(Nc3ccc4c(cnn4Cc4cccc(F)c4)c3)c12	6.55284
CHEMBL3981041	286	nM	CCC(=O)Nc1cc2c(Nc3ccc4c(ccn4S(=O)(=O)c4ccccc4)c3)ncnc2cc1OC	6.54363
CHEMBL3633928	287	nM	NC(=O)Nc1ccc2ncnc(Nc3ccc(OCc4cccc(F)c4)c(Cl)c3)c2c1	6.54212
CHEMBL3114686	290	nM	C#Cc1cccc(Nc2ncnc3cc4c(cc23)N(C(=O)/C=C/CN2CCCCC2C)CCO4)c1	6.5376
CHEMBL3114688	290	nM	C#Cc1cccc(Nc2ncnc3cc4c(cc23)N(C(=O)/C=C/CN2CCCCC2)CCO4)c1	6.5376
CHEMBL1358485	290	nM	CCN(CC)CC1CCN(c2ncc3ncnc(Nc4ccc(F)c(Cl)c4)c3n2)CC1	6.5376
CHEMBL3936505	290	nM	CCOc1cc2ncnc(Nc3ccc(NS(=O)(=O)c4ccccc4)cc3)c2cc1NC(=O)/C=C/CN1CCN(C)CC1	6.5376
CHEMBL596964	295.4	nM	COc1cc2ncnc(NCc3ccc(F)cc3)c2cc1OCCCCCCC(=O)NO	6.52959
CHEMBL3133824	298	nM	O=S(=O)(c1ccc2[nH]c3nccc(Nc4cccc(O)c4)c3c2c1)N1CCOCC1	6.52578
CHEMBL475599	299	nM	CS(=O)(=O)CCNCc1cc(-c2cc3c(Nc4ccc(OCc5cccc(F)c5)c(Cl)c4)ncnc3s2)cs1	6.52433
CHEMBL202621	300	nM	O=C(C#CCN1CCOCC1)Nc1ccc2ncnc(Nc3ccc(F)c(Cl)c3)c2c1	6.52288
CHEMBL4176629	300	nM	NS(=O)(=O)c1ccc(-n2c(SCC(=O)Nc3ccc([N+](=O)[O-])cc3[N+](=O)[O-])nc3cc4ccccc4cc3c2=O)cc1	6.52288
CHEMBL114593	300	nM	COCC#CC(=O)Nc1ccc2ncc(C#N)c(Nc3cccc(Br)c3)c2c1	6.52288
CHEMBL593987	300	nM	COc1cc2c(Nc3ccc(-c4nc5ccccc5s4)c(F)c3)ncnc2cc1OCCCN1CCN(C)CC1	6.52288
CHEMBL94061	301	nM	CN(C)C/C=C/C(=O)Nc1ccc2ncnc(Nc3cccc(Br)c3)c2c1	6.52143
CHEMBL15202	309	nM	COc1ccc2ncnc(Nc3ccc(OCc4ccccc4)cc3)c2c1	6.51004
CHEMBL398388	310	nM	NC(=O)C1CCN(Cc2ccn3ncnc(Nc4ccc5c(cnn5Cc5cccc(F)c5)c4)c23)CC1	6.50864
CHEMBL3133823	310	nM	Clc1ccc(Nc2ccnc3[nH]c4ccccc4c23)cc1	6.50864
CHEMBL394462	310	nM	Cc1ccn2ncnc(Nc3ccc4c(cnn4Cc4ccccn4)c3)c12	6.50864
CHEMBL1683966	318	nM	Cc1ncnc(Nc2ccc(OCc3cccc(F)c3)c(Cl)c2)c1/C=C/C(=O)NCCN1CCOCC1	6.49757
CHEMBL2441565	319	nM	CN(C)C/C=C/C(=O)N1CCOc2cc3ncnc(Nc4ccc(F)c(Cl)c4)c3cc21	6.49621
CHEMBL113900	320	nM	CC(C)N(CC#CC(=O)Nc1ccc2ncc(C#N)c(Nc3cccc(Br)c3)c2c1)C(C)C	6.49485
CHEMBL4741020	321	nM	C=CC(=O)Nc1cccc(-c2c(-c3ccc(N4CCN(C)CC4)cc3)[nH]c3ncn(CC(C)C)c(=O)c23)c1	6.49349
CHEMBL3357635	324.4	nM	COc1cc2ncnc(Nc3ccc(F)c(Cl)c3)c2cc1NC(=O)/C(F)=C/CN1CCCCC1	6.48892
CHEMBL3114701	330	nM	C#Cc1cccc(Nc2ncnc3cc4c(cc23)N(C(=O)/C=C/CN2CCC(C)CC2)CCO4)c1	6.48149
CHEMBL1258118	334	nM	Nc1ncnc2c1c(-c1ccc(Nc3nc4cccc(Cl)c4o3)cc1)nn2[C@H]1CC[C@H](N2CCOCC2)CC1	6.47625
CHEMBL4468924	337	nM	CC1CCN(C/C=C/C(=O)N2CCOc3cc4ncnc(Nc5ccc(F)c(Cl)c5)c4cc32)CC1	6.47237
CHEMBL4445017	344	nM	O=C(/C=C/CN1CCCCC1)N1CCOc2cc3ncnc(Nc4ccc(F)c(Cl)c4)c3cc21	6.46344
CHEMBL540701	347	nM	C=CCOc1ccc2ncnc(Nc3ccc(OCc4ccccc4)cc3)c2c1	6.45967
CHEMBL258352	350	nM	CN1CCN(C(=O)COc2cccc3ncnc(Nc4ccc(OCc5ccccn5)c(Cl)c4)c23)CC1	6.45593
CHEMBL592466	350	nM	Oc1ccc(CN(Cc2cccc(Cl)c2O)C(=S)Nc2ccccc2)cc1	6.45593
CHEMBL1614707	350	nM	FC(F)(F)c1ccc(/C=C/c2nc(COc3ccc(CCCCn4ccnn4)cc3)co2)cc1	6.45593
CHEMBL602728	350	nM	O=C(Nc1cccc2ccccc12)c1ccc(N(CCCl)CCCl)cc1	6.45593
CHEMBL5170804	357	nM	Cc1ccc(-c2c(CN3CCOCC3)nc3scc(C(=O)NN)n23)cc1	6.44733
CHEMBL252246	359	nM	O=C(NO)[C@H]1CC2(CC2)CN[C@@H]1C(=O)N1CCC(c2ccccc2)C1	6.44491
CHEMBL214419	360	nM	CS(=O)(=O)CCNCc1ccc(-c2ccc3ncnc(Nc4ccc(OCc5cccc(C(F)(F)F)c5)cc4)c3c2)o1	6.4437
CHEMBL201684	360	nM	C#CCCCn1c(Sc2cc(OC)ccc2I)nc2c(N)nc(F)nc21	6.4437
CHEMBL1645464	360	nM	Cn1ncc2cc(Nc3ncnn4ccc(CN5CCC(N)CC5)c34)ccc21	6.4437
CHEMBL391675	360	nM	Fc1cccc(Cn2ncc3cc(Nc4ncnn5ccc(CN6CCCC6)c45)ccc32)c1	6.4437
CHEMBL2408052	360	nM	CNC(=O)CN1CCC(Oc2cc3c(Nc4cccc(Cl)c4)ncnc3cc2OC)CC1	6.4437
CHEMBL379892	370	nM	COc1ccc(I)c(Sc2nc3c(N)ncnc3n2CCC=C(C)C)c1	6.4318
CHEMBL1090356	370	nM	O=C(Cc1ccccc1)Nc1cccc(-c2nc3sccn3c2-c2ccnc(Nc3ccc(N4CCOCC4)cc3)n2)c1	6.4318
CHEMBL461811	370	nM	Cc1cc(Oc2ccc(Nc3ncnc4cc(C#C[C@@H]5C[C@@H](OC(=O)N6CCOCC6)CN5)sc34)cc2Cl)no1	6.4318
CHEMBL115187	370	nM	CCCN(CC#CC(=O)Nc1ccc2ncc(C#N)c(Nc3cccc(Br)c3)c2c1)CCC	6.4318
CHEMBL3133832	376	nM	O=S(=O)(c1ccc2[nH]c3nccc(Nc4cccc(O)c4)c3c2c1)N1CCN(CCO)CC1	6.42481
CHEMBL91867	378	nM	CC#CC(=O)Nc1ccc2ncnc(Nc3cccc(Br)c3)c2c1	6.42251
CHEMBL326280	380	nM	COCC#CC(=O)Nc1cc2c(Nc3cccc(Br)c3)c(C#N)cnc2cc1OC	6.42022
CHEMBL396079	380	nM	c1ccc(Cn2ncc3cc(Nc4ncnn5ccc(COC[C@@H]6CNCCO6)c45)ccc32)nc1	6.42022
CHEMBL414631	380	nM	COCOC#CC(=O)Nc1ccc2ncc(C#N)c(Nc3cccc(Br)c3)c2c1	6.42022
CHEMBL4458843	384	nM	CC1CCCCN1C/C=C/C(=O)N1CCOc2cc3ncnc(Nc4ccc(F)c(Cl)c4)c3cc21	6.41567
CHEMBL3929484	386.1	nM	O=C(CCCCCn1cc(-c2ccc3ncnc(Nc4cccc(Cl)c4F)c3c2)nn1)NO	6.4133
CHEMBL4166412	390	nM	NS(=O)(=O)c1ccc(-n2c(SCC(=O)Nc3cnc4ccccc4c3)nc3cc4ccccc4cc3c2=O)cc1	6.40894
CHEMBL3133828	390	nM	COc1cccc(Nc2ccnc3[nH]c4ccc(S(=O)(=O)N5CCNCC5)cc4c23)c1	6.40894
CHEMBL425738	390	nM	CCOC(=O)c1cc2c(Nc3ccc4c(cnn4Cc4ccccc4)c3)ncnn2c1	6.40894
CHEMBL1256428	397	nM	COCCCN1CCN([C@H]2CC[C@@H](n3nc(-c4ccc(Nc5nc6cccc(Cl)c6o5)cc4)c4c(N)ncnc43)CC2)CC1	6.40121
CHEMBL3934034	404	nM	CCC(=O)Nc1cc2c(Nc3ccc(OCc4ccccc4)cc3)ncnc2cc1OC	6.39362
CHEMBL3930316	406	nM	CCC(=O)Nc1cc2c(Nc3ccc(F)c(Cl)c3)ncnc2cc1OC	6.39147
CHEMBL589588	410	nM	COc1ccc(NC(=O)c2ccc(N(CCCl)CCCl)cc2)cc1	6.38722
CHEMBL2408048	410	nM	COc1cc2ncnc(Nc3cccc(Cl)c3F)c2cc1OC1CCN(CC(=O)NC(C)C)CC1	6.38722
CHEMBL247127	410	nM	c1cncc(Cn2ncc3cc(Nc4ncnn5ccc(COC[C@@H]6CNCCO6)c45)ccc32)c1	6.38722
CHEMBL3930965	413	nM	COc1cc2ncnc(Nc3ccc(Cc4ccccn4)cc3)c2cc1NC(=O)/C=C/CN1CCCC1	6.38405
CHEMBL93783	414	nM	CN(C/C=C/C(=O)Nc1ccc2ncnc(Nc3cccc(Br)c3)c2c1)CCO	6.383
CHEMBL3943512	419	nM	CCC(=O)Nc1cc2c(Nc3ccc(Oc4ccccc4)cc3)ncnc2cc1OC	6.37779
CHEMBL592457	420	nM	O=C1CSC(N/N=C/c2cc(Br)ccc2O)=N1	6.37675
CHEMBL246489	420	nM	COCCOCc1ccn2ncnc(Nc3ccc4c(cnn4Cc4cccc(F)c4)c3)c12	6.37675
CHEMBL394056	420	nM	COCc1ccn2ncnc(Nc3ccc4c(cnn4Cc4cccc(F)c4)c3)c12	6.37675
CHEMBL247101	430	nM	Cc1ccn2ncnc(Nc3ccc(OCc4cccc(F)c4)c(Cl)c3)c12	6.36653
CHEMBL255236	435	nM	COc1ccccc1CO/N=C/c1c(N)ncnc1Nc1ccc2c(cnn2Cc2cccc(F)c2)c1	6.36151
CHEMBL257859	440	nM	Clc1cc(Nc2ncnc3[nH]nc(OCCCN4CCOCC4)c23)ccc1OCc1ccccn1	6.35655
CHEMBL5207091	440	nM	Cc1ccccc1NCc1coc(/C=C/c2ccc(C(F)(F)F)cc2)n1	6.35655
CHEMBL1683962	440	nM	Cc1ncnc(Nc2ccc(OCc3cccc(F)c3)c(Cl)c2)c1C#Cc1ccc(CN2CCOCC2)cc1	6.35655
CHEMBL449949	450	nM	O=C(O[C@H]1CN[C@H](C#Cc2cc3ncnc(Nc4ccc(OCc5cccc(F)c5)nc4)c3s2)C1)N1CCOCC1	6.34679
CHEMBL115440	450	nM	COCCOCC#CC(=O)Nc1ccc2ncc(C#N)c(Nc3cccc(Br)c3)c2c1	6.34679
CHEMBL3961532	458	nM	CCC(=O)Nc1cc2c(Nc3ccc(OCc4cccc(F)c4)c(Cl)c3)ncnc2cc1OC	6.33913
CHEMBL94066	458	nM	C=C(CN1CCOCC1)C(=O)Nc1ccc2ncnc(Nc3cccc(Br)c3)c2c1	6.33913
CHEMBL2316785	460	nM	Brc1ccc(C2=NN(c3nc(-c4ccc(Br)cc4)cs3)C(c3ccc4c(c3)OCCO4)C2)cc1	6.33724
CHEMBL202398	464	nM	CCCCN(CC#CC(=O)Nc1ccc2ncnc(Nc3ccc(F)c(Cl)c3)c2c1)CCCC	6.33348
CHEMBL496212	470	nM	O=C(NO)[C@H]1CCCC[C@@H]1C(=O)N1CCN(c2ccccc2)CC1	6.3279
CHEMBL500591	470	nM	N#Cc1c(N)ncnc1Nc1ccc(OCc2ccccc2)c(Cl)c1	6.3279
CHEMBL1256436	478	nM	Cc1cc(Nc2nc3cccc(Cl)c3o2)ccc1-c1nn([C@H]2CC[C@H](N3CCN(C)CC3)CC2)c2ncnc(N)c12	6.32057
CHEMBL596957	478.2	nM	COc1cc2ncnc(NCc3ccc(Cl)c(F)c3)c2cc1OCCCCCCC(=O)NO	6.32039
CHEMBL4443188	482.1	nM	COC[C@H](C)Oc1cc2ncnc(Nc3ccc(F)c(Cl)c3)c2cc1NC(=O)/C=C/CN(C)C	6.31686
CHEMBL595406	490	nM	COc1cc2c(Nc3ccc(-c4nc5ccccc5s4)cc3C)ncnc2cc1OCCCN1CCN(C)CC1	6.3098
CHEMBL372293	500	nM	CCc1c(C(=O)N(C)C)cn2ncnc(Nc3ccc4c(cnn4Cc4ccccc4)c3)c12	6.30103
CHEMBL258694	500	nM	Cc1nnc(-c2cn3ncnc(Nc4cnc5[nH]ccc5c4)c3c2C(C)C)o1	6.30103
CHEMBL3957801	509	nM	CCC(=O)Nc1cc2c(Nc3ccc(F)c(Cl)c3)ncnc2cc1OCCCN1CCOCC1	6.29328
CHEMBL3746557	510	nM	CC(=O)N1N=C(c2ccc(C(F)(F)F)cc2)CC1c1ccc(C(=O)OCCn2c([N+](=O)[O-])cnc2C)cc1	6.29243
CHEMBL397122	510	nM	C[C@@H](c1cccc(F)c1)n1ncc2cc(Nc3ncnn4ccc(COC[C@@H]5CNCCO5)c34)ccc21	6.29243
CHEMBL3936761	530	nM	C=CC(=O)N1CCC([C@@H]2CCNc3c(C(N)=O)c(-c4ccc(Oc5ccccc5)cc4)nn32)CC1	6.27572
CHEMBL3939771	537.4	nM	O=C(CCCCCn1cc(-c2ccc3ncnc(Nc4ccc(OCc5nccs5)c(Cl)c4)c3c2)nn1)NO	6.2697
CHEMBL230680	550	nM	COCC(=O)NCC#Cc1ccc2ncnc(Nc3ccc(OC4CCN(C(=O)C5CCCO5)CC4)c(C)c3)c2c1	6.25964
CHEMBL269620	550	nM	CS(=O)(=O)CCNc1nc(-c2ccc3ncnc(Nc4ccc(OCc5cccc(C(F)(F)F)c5)cc4)c3c2)cs1	6.25964
CHEMBL2408054	550	nM	CNC(=O)CCN1CCC(Oc2cc3c(Nc4cccc(Cl)c4F)ncnc3cc2OC)CC1	6.25964
CHEMBL3904205	556	nM	CCC(=O)Nc1cc2c(Nc3ccc4c(c3)CCN4Cc3ccccc3)ncnc2cc1OC	6.25493
CHEMBL598407	556.9	nM	COc1cc2ncnc(N[C@@H](C)c3ccc(Cl)cc3)c2cc1OCCCCCCC(=O)NO	6.25422
CHEMBL402149	557	nM	CO/N=C/c1c(N)ncnc1Nc1cccc(Br)c1	6.25414
CHEMBL1928945	559	nM	Nc1cccc(Oc2cc(Nc3ccc(OCc4cccc(F)c4)c(Cl)c3)ncn2)c1	6.25259
CHEMBL246493	560	nM	Fc1cccc(COc2ccc(Nc3ncnn4ccc(COC[C@@H]5CNCCO5)c34)cc2Cl)c1	6.25181
CHEMBL245868	560	nM	CN(C)CCCOCc1ccn2ncnc(Nc3ccc4c(cnn4Cc4cccc(F)c4)c3)c12	6.25181
CHEMBL3133829	576	nM	CCOc1cccc(Nc2ccnc3[nH]c4ccc(S(=O)(=O)N5CCNCC5)cc4c23)c1	6.23958
CHEMBL246492	590	nM	Fc1cccc(Cn2ncc3cc(Nc4ncnn5ccc(COC[C@@H]6COCCN6)c45)ccc32)c1	6.22915
CHEMBL3828021	590	nM	C#Cc1cccc(Nc2ncnc3ccc(-c4cnn(C)c4)cc23)c1	6.22915
CHEMBL2205030	590	nM	O=S1(=O)N=S(c2ccc(Br)cc2)c2ccncc21	6.22915
CHEMBL4593016	590	nM	COc1cc2ncnc(Nc3ccc(Oc4ccc(C)nc4)c(C)c3)c2cc1NC(=O)C1CSSC1	6.22915
CHEMBL4759651	592	nM	C=CC(=O)Nc1cccc(-c2c(-c3ccc(N4CCN(C)CC4)cc3)[nH]c3ncn(C(C)C)c(=O)c23)c1	6.22768
CHEMBL202425	597	nM	CCN(CC)CC#CC(=O)Nc1cc2c(Nc3ccc(F)c(Cl)c3)ncnc2cn1	6.22403
CHEMBL231885	610	nM	CC(=O)N1CCN(Cc2ccn3ncnc(Nc4ccc5c(cnn5Cc5cccc(F)c5)c4)c23)CC1	6.21467
CHEMBL4103370	610	nM	Clc1ccc(-c2nnc(Cc3nc4ccccc4[nH]3)o2)cc1	6.21467
CHEMBL1080272	620	nM	O=C(NCCN1CCCC1)c1cc2cnnc(Nc3ccc(OCc4cccc(F)c4)c(Cl)c3)c2[nH]1	6.20761
CHEMBL3633930	625	nM	CCNC(=O)Nc1ccc2ncnc(Nc3ccc(Oc4cccc(C(F)(F)F)c4)c(Cl)c3)c2c1	6.20412
CHEMBL4759405	633.7	nM	Cc1ccc(C2=N/C(=C/c3ccc(Cl)cc3)C(=O)NN2C(=O)Cc2nc3c(c(C)nn3-c3ccccc3)c(=O)[nH]2)cc1	6.19812
CHEMBL442754	634	nM	COCCN(C)C/C=C/C(=O)Nc1ccc2ncnc(Nc3cccc(Br)c3)c2c1	6.19791
CHEMBL3968839	642	nM	CCC(=O)Nc1cc2c(Nc3ccc4c(ccn4Cc4ccccn4)c3)ncnc2cc1OC	6.19246
CHEMBL604042	660	nM	Oc1ccc(CN(Cc2cccc(Br)c2O)C(=S)Nc2ccccc2)cc1	6.18046
CHEMBL251732	664	nM	Nc1ncnc2c1c(-c1ccc3nc(Cc4ccccc4Cl)[nH]c3c1)nn2[C@H]1CC[C@H](N2CCOCC2)CC1	6.17783
CHEMBL2408049	670	nM	COc1cc2ncnc(Nc3cccc(Cl)c3F)c2cc1OC1CCN(CC(=O)N(C)C)CC1	6.17393
CHEMBL4549542	674	nM	CN1CCN(C/C=C/C(=O)N2CCOc3cc4ncnc(Nc5ccc(F)c(Cl)c5)c4cc32)CC1	6.17134
CHEMBL3828269	676	nM	Cn1cc(-c2ccc3ncnc(Nc4ccc(F)c(Cl)c4)c3c2)cn1	6.17005
CHEMBL372692	680	nM	CCc1c(CC(=O)O)cn2ncnc(Nc3ccc4c(cnn4Cc4ccccc4)c3)c12	6.16749
CHEMBL3133830	689	nM	COc1cccc(Nc2ccnc3[nH]c4ccc(S(=O)(=O)N5CCN(CCO)CC5)cc4c23)c1	6.16178
CHEMBL3633775	706	nM	NC(=O)Nc1ccc2ncnc(Nc3ccc(Oc4ccc(Cl)c(Cl)c4)c(Cl)c3)c2c1	6.1512
CHEMBL3902778	706.7	nM	O=C(CCCCCCn1cc(-c2ccc3ncnc(Nc4ccc(OCc5nccs5)c(Cl)c4)c3c2)nn1)NO	6.15076
CHEMBL479800	709	nM	Fc1cccc(COc2ccc(Nc3ncnc4cc(-c5ccco5)sc34)cc2Cl)c1	6.14935
CHEMBL1421	710	nM	Cc1nc(Nc2ncc(C(=O)Nc3c(C)cccc3Cl)s2)cc(N2CCN(CCO)CC2)n1	6.14874
CHEMBL458997	710	nM	CNC(=O)c1ccccc1Nc1nc(Nc2ccc(N3CCOCC3)cc2OC)ncc1Cl	6.14874
CHEMBL1922903	720	nM	N#Cc1ccc(Oc2ccc(Nc3ncnc4cc[nH]c34)cc2Cl)cc1	6.14267
CHEMBL373025	730	nM	CCc1c(CO)cn2ncnc(Nc3ccc4c(cnn4Cc4ccccc4)c3)c12	6.13668
CHEMBL4456266	730	nM	CCOc1cc2ncc(C#N)c(Nc3ccc(OCc4cccc(F)c4)c(Cl)c3)c2cc1NC(=O)C1CSSC1	6.13668
CHEMBL4446124	730	nM	N#Cc1cnc2ccc(NC(=O)CC3CCSS3)cc2c1Nc1ccc(OCc2cccc(F)c2)c(Cl)c1	6.13668
CHEMBL419501	733	nM	COC[C@H]1CCCN1C/C=C/C(=O)Nc1ccc2ncnc(Nc3cccc(Br)c3)c2c1	6.1349
CHEMBL521284	733	nM	c1ccc(Oc2ccc(Nc3ccnc4ccccc34)cc2)cc1	6.1349
CHEMBL1683958	740	nM	Cc1ncnc(Nc2ccc(OCc3cccc(F)c3)c(Cl)c2)c1/C=N/OCCN1CCOCC1	6.13077
CHEMBL233324	750	nM	O=C1CCN(Cc2ccn3ncnc(Nc4ccc5c(cnn5Cc5cccc(F)c5)c4)c23)CCN1	6.12494
CHEMBL1934621	750	nM	Cc1ncnc(Nc2ccc(OCc3cccc(F)c3)c(Cl)c2)c1C#Cc1ccccc1	6.12494
CHEMBL4164936	760	nM	NS(=O)(=O)c1ccc(-n2c(SCC(=O)Nc3cc(Cl)c(Cl)cc3Cl)nc3cc4ccccc4cc3c2=O)cc1	6.11919
CHEMBL553	760	nM	C#Cc1cccc(Nc2ncnc3cc(OCCOC)c(OCCOC)cc23)c1	6.11919
CHEMBL512391	776	nM	Nc1ncnc(Nc2ccc(OCc3ccccc3)c(Cl)c2)c1C(=O)O	6.11014
CHEMBL461114	776	nM	Nc1ncnc(Nc2ccc(OCc3ccccc3)c(Cl)c2)c1C(=O)Nc1ccccc1	6.11014
CHEMBL379093	780	nM	Fc1cccc(COc2ccc(Nc3ncncc3C#Cc3ccccc3)cc2Cl)c1	6.10791
CHEMBL606466	780	nM	COc1cc2c(Nc3ccc(-c4nc5ccccc5s4)c(O)c3)ncnc2cc1OCCCN1CCN(C)CC1	6.10791
CHEMBL3964380	782	nM	CCC(=O)Nc1cc2c(Nc3ccc4c(ccn4Cc4ccco4)c3)ncnc2cc1OC	6.10679
CHEMBL3970738	798	nM	CCC(=O)Nc1cc2c(Nc3ccc(NS(=O)(=O)c4ccccc4)cc3)ncnc2cc1OC	6.098
CHEMBL3963723	800	nM	CCC(=O)Nc1cc2c(Nc3ccc4[nH]ccc4c3)ncnc2cc1OC	6.09691
CHEMBL3325479	800	nM	CCOC(=O)C1=C(N)N(c2cccnc2)C2=C(C(=O)CCC2)C1c1cc2cc(OC)ccc2n2nnnc12	6.09691
CHEMBL501050	800	nM	O=C(O[C@H]1CN[C@H](C#Cc2cc3ncnc(Nc4ccc(Sc5cccc(F)c5)c(Cl)c4)c3s2)C1)N1CCOCC1	6.09691
CHEMBL1683975	810	nM	Cc1ncnc(Nc2ccc(OCc3cccc(F)c3)c(Cl)c2)c1C#CCCNCc1ccccc1	6.09151
CHEMBL3925158	815	nM	CCC(=O)Nc1cc2c(Nc3ccc(OCc4ccccn4)cc3)ncnc2cc1OC	6.08884
CHEMBL5201807	820	nM	Cc1cccc(-c2ccc3c(ccn3Cc3coc(/C=C/c4ccc(C(F)(F)F)cc4)n3)c2)c1	6.08619
CHEMBL194349	820	nM	CCOC(=O)c1cn2ncnc(Nc3ccc(Oc4ccccc4)cc3)c2c1CC	6.08619
CHEMBL1928956	834	nM	O=C(Cc1cc(F)c(F)cc1F)Nc1cccc(Oc2cc(Nc3ccc(OCc4cccc(F)c4)c(Cl)c3)ncn2)c1	6.07883
CHEMBL1082012	843	nM	Cc1c(C(=O)NCCN2CCN(C)CC2)[nH]c2cnnc(Nc3ccc(OCc4cccc(F)c4)c(Cl)c3)c12	6.07417
CHEMBL2316794	850	nM	COc1ccc(-c2csc(N3N=C(c4ccc(Br)cc4)CC3c3ccc4c(c3)OCO4)n2)cc1	6.07058
CHEMBL245277	850	nM	C[C@@H](c1ccccc1)n1ncc2cc(Nc3ncnn4ccc(COC[C@@H]5CNCCO5)c34)ccc21	6.07058
CHEMBL3633941	855	nM	CCNC(=O)Nc1ccc(C(=O)Nc2ccc3ncnc(Nc4ccc(F)c(Cl)c4)c3c2)cc1	6.06803
CHEMBL2408053	860	nM	CNC(=O)CN1CCC(Oc2cc3c(Nc4cc(Cl)ccc4F)ncnc3cc2OC)CC1	6.0655
CHEMBL5189871	860	nM	Cc1cccc(NCc2coc(/C=C/c3ccc(C(F)(F)F)cc3)n2)c1	6.0655
CHEMBL4753913	865.7	nM	COc1ccc(/C=C2/N=C(c3ccc(Cl)cc3)N(C(=O)Cc3nc4c(c(C)nn4-c4ccccc4)c(=O)[nH]3)NC2=O)cc1	6.06263
CHEMBL4790553	872.3	nM	Cc1nn(-c2ccccc2)c2nc(CC(=O)N3NC(=O)/C(=C\c4ccccc4)N=C3c3ccccc3)[nH]c(=O)c12	6.05933
CHEMBL3828079	874	nM	Cn1cc(-c2ccc3ncnc(Nc4ccc5ncccc5c4)c3c2)cn1	6.05849
CHEMBL4291471	879	nM	CC(=O)Nc1ccc(-c2cc3c(Nc4ccc(Oc5cccc(C(F)(F)F)c5)c(Cl)c4)ncnc3s2)cc1	6.05601
CHEMBL2325087	880	nM	NC(=S)N1N=C(c2ccc(Cl)c(Cl)c2)CC1c1ccc2ccccc2c1	6.05552
CHEMBL1645468	880	nM	CC(C)Nc1ncnn2ccc(CN3CCC(N)CC3)c12	6.05552
CHEMBL4069003	890	nM	NP(=O)(OCCCOc1ccc2ncnc(Nc3cccc(Br)c3)c2c1)N(CCCl)CCCl	6.05061
CHEMBL3960911	897	nM	CCC(=O)Nc1cc2c(Nc3ccc4c(c3)CCN4Cc3ccccn3)ncnc2cc1OC	6.04721
CHEMBL519757	898	nM	Fc1cccc(COc2ccc(Nc3ncnc4sc(-c5ccc(CNCc6ccccc6)o5)cc34)cc2Cl)c1	6.04672
CHEMBL4084249	910	nM	COc1ccc(-c2nnc(Cc3nc4ccccc4[nH]3)o2)cc1	6.04096
CHEMBL3114699	930	nM	C#Cc1cccc(Nc2ncnc3cc4c(cc23)N(C(=O)/C=C/CN2CCOCC2)CCO4)c1	6.03152
CHEMBL1080990	934	nM	CCOC(=O)c1[nH]c(C)c2cnnc(Nc3ccc(OCc4cccc(F)c4)c(Cl)c3)c12	6.02965
CHEMBL3923650	958	nM	CCC(=O)Nc1cc2c(Nc3ccc(NS(=O)(=O)c4ccccc4)nc3)ncnc2cc1OC	6.01863
CHEMBL477197	960	nM	Oc1cc2c(cc1O)[C@@H]1c3ccc(O)c(O)c3OC[C@]1(O)C2	6.01773
CHEMBL1087368	960	nM	CCN(CC)CCNC(=O)c1[nH]c2cnnc(Nc3ccc(OCc4cccc(F)c4)c(Cl)c3)c2c1C	6.01773
CHEMBL2031311	970	nM	CCOc1cc2ncc(C#N)c(Nc3ccc(OCc4ccccn4)c(Cl)c3)c2cc1NC(=O)CCN(C)C	6.01323
CHEMBL273789	977	nM	CS(=O)(=O)CCN(CCCCOc1ccc2ncnc(Nc3ccc(OCc4ccccc4)cc3)c2c1)C(=O)C(F)(F)F	6.01011
CHEMBL3133817	978	nM	CC(=O)c1ccc2[nH]c3nccc(Nc4cccc([N+](=O)[O-])c4)c3c2c1	6.00966
CHEMBL3133820	978	nM	Cc1ccccc1Nc1ccnc2[nH]c3ccccc3c12	6.00966
CHEMBL2031312	980	nM	CCOc1cc2ncc(C#N)c(Nc3ccc(OCc4ccccn4)c(Cl)c3)c2cc1NC(=O)CCN1CCCCC1	6.00877
CHEMBL2441561	996	nM	O=C(/C=C/CN1CCOCC1)N1CCOc2cc3ncnc(Nc4ccc(F)c(Cl)c4)c3cc21	6.00174
CHEMBL3945072	1000	nM	COc1cc2c(Nc3ccc(Cl)c(Cl)c3F)ncnc2cc1OC[C@@H]1CN2CCC[C@@H]2C(=O)N1	6
CHEMBL3967530	1000	nM	COc1cc2ncnc(NCc3ccc(F)c(Cl)c3)c2cc1OCCCCCCC(=O)NO	6
CHEMBL3910297	1000	nM	C[C@@H](Nc1ncnc2[nH]c(-c3ccc(CNCC(=O)NO)cc3)cc12)c1ccccc1	6
CHEMBL3934134	1000	nM	COc1cc2c(Nc3ccc(Br)c(Cl)c3Cl)ncnc2cc1OC[C@@H]1CO[C@H]2[C@@H]1OC[C@@H]2OC	6
CHEMBL3940489	1000	nM	COc1cc2c(Nc3ccc(Cl)c(Cl)c3F)ncnc2cc1OC[C@@H]1CN2CCCC[C@H]2C(=O)N1	6
CHEMBL3900059	1000	nM	COc1cc2c(Nc3ccc(Cl)c(Cl)c3F)ncnc2cc1OC[C@@H]1CN2CCCC[C@@H]2C(=O)N1	6
CHEMBL3633934	1000	nM	CCOC(=O)C(=CNc1ccc2ncnc(Nc3ccc(Oc4cccc(C(F)(F)F)c4)c(Cl)c3)c2c1)C(=O)OCC	6
CHEMBL3986135	1000	nM	COc1cc2c(Nc3ccc(Br)c(Cl)c3F)ncnc2cc1OC[C@@H]1CN2CCC[C@H]2C(=O)N1	6
CHEMBL3985004	1000	nM	O=C(CCCCCCOc1ccc(-c2cc3c(NCc4ccccc4)ncnc3[nH]2)cc1)NO	6
CHEMBL3983466	1000	nM	COc1cc2c(Nc3ccc(Cl)c(Cl)c3F)ncnc2cc1OC[C@@H]1CN2CCC[C@H]2C(=O)N1C	6
CHEMBL3946590	1000	nM	COc1cc2c(Nc3cc(Cl)c(Br)cc3F)ncnc2cc1O[C@@H]1C[C@H]2OC[C@H](OC)[C@H]2O1	6
CHEMBL3958481	1000	nM	COc1cc2c(Nc3ccc(Cl)c(Cl)c3Cl)ncnc2cc1O[C@@H]1C[C@H]2OC[C@H](OC)[C@H]2O1	6
CHEMBL3955486	1000	nM	COc1cc2c(Nc3ccc(F)c(Cl)c3F)ncnc2cc1O[C@@H]1C[C@H]2OC[C@H](OC)[C@H]2O1	6
CHEMBL3924380	1000	nM	COc1cc2c(Nc3cc(Cl)c(Cl)cc3F)ncnc2cc1O[C@@H]1C[C@H]2OC[C@H](OC)[C@H]2O1	6
CHEMBL3905501	1000	nM	COc1cc2c(Nc3ccc(Br)c(Cl)c3Cl)ncnc2cc1OC[C@@H]1CN2CCOC[C@H]2CO1	6
CHEMBL3968192	1000	nM	COc1cc2c(Nc3ccc(Br)c(Cl)c3Cl)ncnc2cc1OC[C@H]1CN2CCCC[C@H]2CO1	6
CHEMBL400858	1000	nM	Cc1cccc2[nH]c(-c3n[nH]c4ncc(-c5cncc6ccccc56)cc34)nc12	6
CHEMBL3927849	1000	nM	COc1cc2c(Nc3ccc(Br)c(Cl)c3)ncnc2cc1O[C@H]1CO[C@H]2[C@@H]1OC[C@@H]2N1CCCCC1	6
CHEMBL3916953	1000	nM	COc1cc2c(Nc3ccc(Cl)c(Cl)c3)ncnc2cc1OCCC1CN(C(=O)OC(C)(C)C)C(C)(C)CO1	6
CHEMBL3974328	1000	nM	CN[C@H]1CO[C@H]2[C@@H]1OC[C@@H]2Oc1cc2ncnc(Nc3ccc(Br)c(Cl)c3)c2cc1OC	6
CHEMBL175558	1000	nM	COc1cc2ncc(C#N)c(Nc3ccc(Sc4ncc(-c5ccccc5)s4)c(Cl)c3)c2cc1NC(=O)/C=C/CN(C)C	6
CHEMBL3976788	1000	nM	COc1cc2c(Nc3ccc(Br)c(Cl)c3)ncnc2cc1O[C@H]1CO[C@H]2[C@@H]1OC[C@@H]2N	6
CHEMBL3933359	1000	nM	COc1cc2c(Nc3ccc(Br)c(Cl)c3)ncnc2cc1O[C@H]1CO[C@H]2[C@@H]1OC[C@@H]2OC(C)=O	6
CHEMBL3923645	1000	nM	COc1cc2c(Nc3ccc(Br)c(Cl)c3)ncnc2cc1O[C@H]1CO[C@H]2[C@@H]1OC[C@@H]2N1CCCC1	6
CHEMBL3707348	1000	nM	CC#CC(=O)N1CCC[C@H]1c1nc(-c2ccc(C(=O)Nc3ccccn3)cc2)c2c(N)nccn12	6
CHEMBL4568087	1000	nM	Cn1cc(-c2cnc3c(-c4csc(C(=O)N[C@@H]5CCCC[C@@H]5N)c4)cnn3c2)cn1	6
CHEMBL3972940	1000	nM	COc1cc2c(Nc3ccc(Br)c(Cl)c3)ncnc2cc1O[C@H]1CO[C@H]2[C@@H]1OC[C@@H]2N1CCN(C)CC1	6
CHEMBL3921861	1000	nM	COc1cc2c(Nc3ccc(Br)c(Cl)c3)ncnc2cc1O[C@H]1CO[C@H]2[C@@H]1OC[C@@H]2N1CCOCC1	6
CHEMBL3947643	1000	nM	COc1cc2c(Nc3ccc(Br)c(Cl)c3)ncnc2cc1O[C@H]1CO[C@H]2[C@@H]1OC[C@@H]2SC	6
CHEMBL1917092	1000	nM	COC(=O)c1ccc2c(c1)S(=O)(=O)N=S2c1ccc(Br)cc1	6
CHEMBL3986082	1000	nM	COc1cc2c(Nc3ccc(Br)c(Cl)c3)ncnc2cc1O[C@@H]1CO[C@H]2[C@@H]1OC[C@@H]2OS(C)(=O)=O	6
CHEMBL3965625	1000	nM	COc1cc2c(Nc3ccc(Br)c(Cl)c3)ncnc2cc1OC1=CO[C@H]2[C@H]1OC[C@@]21COC(C)(C)O1	6
CHEMBL3909603	1000	nM	COc1cc2c(Nc3ccc(Cl)c(Cl)c3F)ncnc2cc1OC[C@@H]1CN(C)CC(=O)N1C	6
CHEMBL3891130	1000	nM	COc1cc2c(Nc3ccc(Br)c(Cl)c3F)ncnc2cc1OC[C@@H]1CN(C)CC(=O)N1C	6
CHEMBL3891059	1000	nM	COc1cc2c(Nc3ccc(C)c(Cl)c3Cl)ncnc2cc1OCC1CN(C)CCO1	6
CHEMBL3909572	1000	nM	CCN(CC)[C@H]1CO[C@H]2[C@@H]1OC[C@@H]2Oc1cc2ncnc(Nc3ccc(Br)c(Cl)c3)c2cc1OC	6
CHEMBL3921390	1000	nM	COc1cc2c(Nc3ccc(Cl)c(Cl)c3C)ncnc2cc1OCC1CN(C)CCO1	6
CHEMBL3923250	1000	nM	COc1cc2c(Nc3ccc(Cl)c(Cl)c3)ncnc2cc1OCc1csc(N2CCOCC2)n1	6
CHEMBL3985116	1000	nM	COc1cc2c(Nc3ccc(Cl)c(Cl)c3N3CCN(C)CC3)ncnc2cc1O[C@H]1CO[C@H]2[C@@H]1OC[C@@H]2F	6
CHEMBL3890300	1000	nM	COc1cc2c(Nc3ccc(N4CCN(C)C(F)C4)cc3)ncnc2cc1O[C@H]1CO[C@H]2[C@@H]1OC[C@@H]2F	6
CHEMBL3895458	1000	nM	COc1cc2c(Nc3cccc(Br)c3C)ncnc2cc1O[C@H]1CO[C@H]2[C@@H]1OC[C@@H]2OC	6
CHEMBL3929354	1000	nM	COc1cc2c(Nc3ccc(Br)c(Cl)c3)ncnc2cc1O[C@H]1CO[C@H]2[C@@H]1OC[C@H]2OC	6
CHEMBL3893058	1000	nM	COc1cc2c(Nc3ccc(N4CCN(C)CC4)c(Cl)c3Cl)ncnc2cc1O[C@H]1CO[C@H]2[C@@H]1OC[C@@H]2F	6
CHEMBL3971560	1000	nM	COc1cc2c(Nc3ccc(Br)c(Cl)c3)ncnc2cc1OC1CCN(C)C1	6
CHEMBL3924442	1000	nM	COc1cc2c(Nc3ccc(N4CCN(C)CC4)cc3)ncnc2cc1O[C@H]1CO[C@H]2[C@@H]1OC[C@@H]2F	6
CHEMBL3959160	1000	nM	COc1cc2c(Nc3cccc(Cl)c3C)ncnc2cc1O[C@H]1CO[C@H]2[C@@H]1OC[C@@H]2OC	6
CHEMBL539947	1000	nM	CC(C)(C)c1cc(/C=C(\C#N)C(N)=S)cc(C(C)(C)C)c1O	6
CHEMBL3961417	1000	nM	COc1cc2c(Nc3ccc(Br)c(Cl)c3)ncnc2cc1O[C@H]1CO[C@H]2[C@@H]1OC[C@@H]2NC(C)=O	6
CHEMBL5187554	1000	nM	CC#CC(=O)N1CCC[C@H]1n1nc(-c2ccc(C(=O)Nc3ccccn3)cc2)c2c(N)ncnc21	6
CHEMBL2325101	1020	nM	Clc1ccc(C2=NN(c3ccccc3)C(c3ccc4ccccc4c3)C2)cc1Cl	5.9914
CHEMBL4294264	1036	nM	COc1cc2ncnc(Nc3ccc(-c4cc(-c5ccc(Br)cc5)c(C#N)c(=N)[nH]4)cc3)c2cc1OC	5.98464
CHEMBL327023	1040	nM	N#Cc1cnc2ccc(NC(=O)C#CCN3CCSCC3)cc2c1Nc1cccc(Br)c1	5.98297
CHEMBL2324873	1040	nM	Cc1ccc(C2=NN(C(N)=S)C(c3ccc4ccccc4c3)C2)cc1	5.98297
CHEMBL305660	1057.5	nM	CC(C)(C)c1ccc(C(=O)CCCN2CCC(OC(c3ccccc3)c3ccccc3)CC2)cc1	5.97572
CHEMBL1958215	1070	nM	Cc1ccc(C2=NN(C3=NC(=O)CS3)C(c3ccc(Br)cc3)C2)cc1	5.97062
CHEMBL5187503	1070	nM	FC(F)(F)c1ccc(/C=C/c2nc(CNc3ccccc3Br)co2)cc1	5.97062
CHEMBL400569	1070	nM	CCNCc1cncc(-c2cnc3[nH]nc(-c4nc5cc(N6CCN(C)CC6)ccc5[nH]4)c3c2)c1	5.97062
CHEMBL4114766	1081	nM	CC(C)(C)/C=C(\C#N)C(=O)N1CCC[C@@H](n2nc(-c3ccc(Oc4ccccc4)cc3F)c3c(N)ncnc32)C1	5.96617
CHEMBL4104950	1100	nM	COc1cc2ncnc(Nc3ccc(OCc4cccc(F)c4)c(Cl)c3)c2cc1OCCCOP(N)(=O)N(CCCl)CCCl	5.95861
CHEMBL3908711	1100	nM	O=C(CBr)OCCn1c(=O)oc2cc3ncnc(Nc4ccc(F)c(Cl)c4)c3cc21	5.95861
CHEMBL2408211	1100	nM	CNC(=O)CN1CC(Oc2cc3c(Nc4cccc(Cl)c4F)ncnc3cc2OC)C1	5.95861
CHEMBL197525	1100	nM	COc1ccc(Nc2ncnc3cccc(OC4CCN(C)CC4)c23)cc1Cl	5.95861
CHEMBL464210	1100	nM	CNC(=O)c1cc(Nc2ccc(-c3nc4ccccc4s3)cc2)ccn1	5.95861
CHEMBL3114689	1110	nM	C#Cc1cccc(Nc2ncnc3cc4c(cc23)N(C(=O)/C=C/CN2CCN(C)CC2)CCO4)c1	5.95468
CHEMBL5174917	1110	nM	COc1ccc(-c2ccc3c(ccn3Cc3coc(/C=C/c4ccc(C(F)(F)F)cc4)n3)c2)cc1	5.95468
CHEMBL2325100	1130	nM	Cc1ccc(C2=NN(c3ccccc3)C(c3ccc4ccccc4c3)C2)cc1	5.94692
CHEMBL3133819	1150	nM	CC(=O)c1ccc2[nH]c3nccc(Nc4cccc(Cl)c4)c3c2c1	5.9393
CHEMBL3133814	1150	nM	Clc1cccc(Nc2ccnc3[nH]c4ccc(Br)cc4c23)c1	5.9393
CHEMBL91925	1164	nM	CCN(CC)C/C=C/C(=O)Nc1ccc2ncnc(Nc3cccc(Br)c3)c2c1	5.93405
CHEMBL4288374	1200	nM	O=C(NCCN1CCOCC1)Nc1ccc(-c2cc3c(Nc4ccc(Oc5cccc(C(F)(F)F)c5)c(Cl)c4)ncnc3s2)cc1	5.92082
CHEMBL438805	1200	nM	CCCc1c(C(=O)OCC)cn2ncnc(Nc3ccc4c(cnn4Cc4ccccc4)c3)c12	5.92082
CHEMBL2204532	1200	nM	CN(c1ccc(F)c(NC(=O)c2cccc(OC(C)(C)C#N)c2Cl)c1)c1ccc2nc(NC(=O)C3CC3)sc2n1	5.92082
CHEMBL4077956	1200	nM	NP(=O)(Oc1ccc2ncnc(Nc3cccc(Br)c3)c2c1)N(CCCl)CCCl	5.92082
CHEMBL3828092	1202	nM	Fc1ccc(Nc2ncnc3ccc(-c4cnn(C5CCNCC5)c4)cc23)cc1Cl	5.9201
CHEMBL117326	1210	nM	C=C(CN(C)C)C(=O)Nc1cc2c(Nc3ccc(F)c(Cl)c3)c(C#N)cnc2cc1OCC	5.91721
CHEMBL2324871	1210	nM	NC(=S)N1N=C(c2ccc(Br)cc2)CC1c1ccc2ccccc2c1	5.91721
CHEMBL157128	1220	nM	COCC1CCCN1CC#CC(=O)Nc1ccc2ncc(C#N)c(Nc3cccc(Br)c3)c2c1	5.91364
CHEMBL591288	1230	nM	Oc1ccc(CN(Cc2cc(Cl)cc(Cl)c2O)C(=S)Nc2ccccc2)cc1	5.91009
CHEMBL607707	1230	nM	CCOc1cc2ncc(C#N)c(Nc3ccc(F)c(Cl)c3)c2cc1NC(=O)/C=C/CN(C)C	5.91009
CHEMBL1928958	1234	nM	COc1ccc(/C=C/C(=O)Nc2cccc(Oc3cc(Nc4ccc(OCc5cccc(F)c5)c(Cl)c4)ncn3)c2)cc1OC	5.90868
CHEMBL3133825	1240	nM	COc1cccc(Nc2ccnc3[nH]c4ccc(S(=O)(=O)N5CCOCC5)cc4c23)c1	5.90658
CHEMBL2325098	1280	nM	Brc1ccc(C2=NN(c3ccccc3)C(c3ccc4ccccc4c3)C2)cc1	5.89279
CHEMBL5186640	1290	nM	FC(F)(F)c1ccc(/C=C/c2nc(CNc3ccc(Cl)cc3)co2)cc1	5.88941
CHEMBL1928957	1293	nM	O=C(/C=C/c1ccc(F)cc1)Nc1cccc(Oc2cc(Nc3ccc(OCc4cccc(F)c4)c(Cl)c3)ncn2)c1	5.8884
CHEMBL1090353	1300	nM	O=C(CC1CCCC1)Nc1cccc(-c2nc3sccn3c2-c2ccnc(Nc3ccc(N4CCOCC4)cc3)n2)c1	5.88606
CHEMBL3906330	1300	nM	O=C(CBr)OCCn1c(=O)oc2cc3ncnc(Nc4ccc(F)c(F)c4)c3cc21	5.88606
CHEMBL3133821	1300	nM	Oc1cccc(Nc2ccnc3[nH]c4ccccc4c23)c1	5.88606
CHEMBL4080720	1300	nM	COc1cc2ncnc(Nc3ccc(F)c(Cl)c3)c2cc1OCCCOP(N)(=O)N(CCCl)CCCl	5.88606
CHEMBL5270336	1320	nM	CN1C(=O)c2ccc(NC(=O)CSc3nc4cc5ccccc5cc4c(=O)n3-c3ccc(S(N)(=O)=O)cc3)cc2C1=O	5.87943
CHEMBL2316784	1320	nM	COc1ccc(-c2csc(N3N=C(c4ccc(Br)cc4)CC3c3ccc4c(c3)OCCO4)n2)cc1	5.87943
CHEMBL1163749	1320	nM	CCOC(=O)c1cc2cc(Nc3ncnc4cc(OCCCN5CCC(C)CC5)c(OC)cc34)ccc2s1	5.87943
CHEMBL319244	1329	nM	O=C(/C=C/c1ccc(O)c(O)c1)OCCc1ccccc1	5.87648
CHEMBL3827349	1350	nM	c1cnc2ccc(Nc3ncnc4ccc(-c5cnn(C6CCNCC6)c5)cc34)cc2c1	5.86967
CHEMBL1256421	1350	nM	CN1CCN([C@H]2CC[C@@H](n3nc(-c4ccc(Nc5nc6cccc(Cl)c6o5)c(F)c4)c4c(N)ncnc43)CC2)CC1	5.86967
CHEMBL4095253	1350	nM	C=CS(=O)(=O)N1CCC[C@@H]1Cn1cc(-c2ccc3c(c2)OCO3)c2c(N)ncnc21	5.86967
CHEMBL3633933	1390	nM	CCNC(=O)Nc1ccc2ncnc(Nc3ccc(OCc4ccccn4)c(Cl)c3)c2c1	5.85699
CHEMBL196548	1400	nM	CCOCc1cn2ncnc(Nc3ccc4c(cnn4Cc4ccccc4)c3)c2c1CC	5.85387
CHEMBL1090352	1400	nM	O=C(CC1CCCCC1)Nc1cccc(-c2nc3sccn3c2-c2ccnc(Nc3ccc(N4CCOCC4)cc3)n2)c1	5.85387
CHEMBL589560	1410	nM	Oc1c(Cl)cccc1CN(Cc1ccc(F)cc1)C(=S)Nc1ccccc1	5.85078
CHEMBL92731	1428	nM	CCCN(C/C=C/C(=O)Nc1ccc2ncnc(Nc3cccc(Br)c3)c2c1)CCC	5.84527
CHEMBL2325099	1450	nM	COc1ccc(C2=NN(c3ccccc3)C(c3ccc4ccccc4c3)C2)cc1	5.83863
CHEMBL2325097	1460	nM	Clc1ccc(C2=NN(c3ccccc3)C(c3ccc4ccccc4c3)C2)cc1	5.83565
CHEMBL4278886	1500	nM	Nc1ccc(-c2cc3c(Nc4ccc(Oc5cccc(C(F)(F)F)c5)c(Cl)c4)ncnc3s2)cc1	5.82391
CHEMBL2408212	1500	nM	CNC(=O)CN(C)CCOc1cc2c(Nc3cccc(Cl)c3F)ncnc2cc1OC	5.82391
CHEMBL461113	1530	nM	Nc1ncnc(Nc2ccc(OCc3ccccc3)c(Cl)c2)c1C(=O)OCCN1CCOCC1	5.81531
CHEMBL1828862	1530	nM	Cc1ncc([N+](=O)[O-])n1CC(=O)NS(=O)(=O)c1ccc(F)cc1	5.81531
CHEMBL3647967	1536	nM	C=CC(=O)N[C@H]1CC[C@@H](n2nc(-c3ccc(Oc4ccccc4)cc3)c3c(N)ncnc32)CC1	5.81361
CHEMBL3357643	1536	nM	COc1cc2ncnc(Nc3ccc(F)c(Cl)c3)c2cc1NC(=O)/C(F)=C/CN1CCOCC1	5.81361
CHEMBL94068	1559	nM	O=C(/C=C/CN1CCCCC1)Nc1ccc2ncnc(Nc3cccc(Br)c3)c2c1	5.80715
CHEMBL3357639	1574	nM	O=C(Nc1cc2c(Nc3ccc(F)c(Cl)c3)ncnc2cc1O[C@H]1CCOC1)/C(F)=C/CN1CCOCC1	5.803
CHEMBL361322	1580	nM	c1ccc(Cc2nc3cc(Nc4ncnc5nn6ccccc6c45)ccc3[nH]2)cc1	5.80134
CHEMBL94109	1592	nM	O=C(/C=C/CN1CCC(N2CCCCC2)CC1)Nc1ccc2ncnc(Nc3cccc(Br)c3)c2c1	5.79806
CHEMBL3940060	1600	nM	O=C(CCl)OCCn1c(=O)oc2cc3ncnc(Nc4ccc(F)c(Cl)c4)c3cc21	5.79588
CHEMBL462162	1600	nM	COc1cc(Nc2ncnc3[nH]ccc23)ccc1-c1nc2ccccc2s1	5.79588
CHEMBL281300	1630	nM	C=CC(=O)Nc1ccc2ncc(C#N)c(Nc3cccc(Br)c3)c2c1	5.78781
CHEMBL3133818	1640	nM	CC(=O)c1ccc2[nH]c3nccc(Nc4cccc(N)c4)c3c2c1	5.78516
CHEMBL954	1669	nM	CCN(CC)CCOc1ccc(/C(=C(/Cl)c2ccccc2)c2ccccc2)cc1	5.77754
CHEMBL488564	1700	nM	COc1cc2nccc(Nc3ccc(N4C(=O)c5ccc(Cl)cc5C4=O)c(C)c3)c2cc1OC	5.76955
CHEMBL193282	1700	nM	C#CCCCn1c(Sc2cc(OC)c(OC)c(OC)c2Cl)nc2c(N)nc(F)nc21	5.76955
CHEMBL4097216	1700	nM	NP(=O)(OCCCOc1ccc2ncnc(Nc3ccc(OCc4cccc(F)c4)c(Cl)c3)c2c1)N(CCCl)CCCl	5.76955
CHEMBL2325110	1750	nM	NC(=S)N1N=C(c2ccc(F)cc2)CC1c1ccc2ccccc2c1	5.75696
CHEMBL14874	1778	nM	CN(CCCOc1ccc2ncnc(Nc3ccc(OCc4ccccc4)cc3)c2c1)CCS(C)(=O)=O	5.75007
CHEMBL592480	1780	nM	O=C1CSC(N/N=C/c2cc(Cl)ccc2O)=N1	5.74958
CHEMBL1683959	1800	nM	Cc1ncnc(Nc2ccc(OCc3cccc(F)c3)c(Cl)c2)c1/C=N/OCCCN1CCOCC1	5.74473
CHEMBL438075	1820	nM	CC(=O)Nc1ccc(C#Cc2cncnc2Nc2ccc(OCc3cccc(F)c3)c(Cl)c2)cc1	5.73993
CHEMBL5190408	1830	nM	Cc1ccc(NCc2coc(/C=C/c3ccc(C(F)(F)F)cc3)n2)cc1	5.73755
CHEMBL5204707	1840	nM	COc1ccc(NCc2coc(/C=C/c3ccc(C(F)(F)F)cc3)n2)cc1	5.73518
CHEMBL589561	1870	nM	Oc1c(Br)cccc1CN(Cc1ccc(F)cc1)C(=S)Nc1ccccc1	5.72816
CHEMBL334255	1878	nM	CCCCCCCCCCCCCCCC[n+]1ccccc1.[Br-]	5.7263
CHEMBL601040	1880	nM	Cc1ccc(NC(=O)c2ccc(N(CCCl)CCCl)cc2)cc1	5.72584
CHEMBL2325095	1890	nM	c1ccc(C2=NN(c3ccccc3)C(c3ccc4ccccc4c3)C2)cc1	5.72354
CHEMBL1079742	1890	nM	C#Cc1cccc(Nc2ncnc3cc(OCCOC)c(OCCOC)cc23)c1.Cl	5.72354
CHEMBL3325473	1900	nM	COC(=O)C1=C(N)N(c2cccnc2)C2=C(C(=O)CCC2)C1c1cc2ccccc2n2nnnc12	5.72125
CHEMBL2325093	1910	nM	Cc1ccc(C2=NN(c3ccccc3)C(c3cccc4ccccc34)C2)cc1	5.71897
CHEMBL2112370	1912	nM	COC[C@@H]1CCCN1C/C=C/C(=O)Nc1ccc2ncnc(Nc3cccc(Br)c3)c2c1	5.71851
CHEMBL5179098	1940	nM	Fc1cccc(-c2ccc3c(ccn3Cc3coc(/C=C/c4ccc(C(F)(F)F)cc4)n3)c2)c1	5.7122
CHEMBL323630	1950	nM	CN(C)C/C=C/C(=O)Nc1ccc2ncc(C#N)c(Nc3ccc(F)c(Cl)c3)c2c1	5.70997
CHEMBL2325094	1980	nM	Clc1ccc(C2=NN(c3ccccc3)C(c3cccc4ccccc34)C2)cc1Cl	5.70333
CHEMBL605161	2000	nM	O=[N+]([O-])c1ccc2c(c1)S(=O)(=O)N=S2c1ccc(Br)cc1	5.69897
CHEMBL2325096	2010	nM	Fc1ccc(C2=NN(c3ccccc3)C(c3ccc4ccccc4c3)C2)cc1	5.6968
CHEMBL5183608	2010	nM	FC(F)(F)c1ccc(/C=C/c2nc(CNc3cccc(Cl)c3)co2)cc1	5.6968
CHEMBL58	2035.2	nM	O=C1c2c(O)ccc(O)c2C(=O)c2c(NCCNCCO)ccc(NCCNCCO)c21	5.69139
CHEMBL3746473	2060	nM	CC(=O)N1N=C(c2ccc([N+](=O)[O-])cc2)CC1c1ccc(C(=O)OCCn2c([N+](=O)[O-])cnc2C)cc1	5.68613
CHEMBL221753	2084	nM	CC(C)(C)CC(C)(C)c1ccc(OCCOCC[N+](C)(C)Cc2ccccc2)cc1.[Cl-]	5.6811
CHEMBL3325475	2100	nM	COC(=O)C1=C(N)N(c2cccnc2)C2=C(C(=O)CCC2)C1c1cc2cc(OC)ccc2n2nnnc12	5.67778
CHEMBL2333163	2100	nM	O=C(NCCc1ccc(O)c(Br)c1)/C(Cc1cc(Br)c(O)c(Oc2ccc(CCNC(=O)/C(Cc3cc(Br)c(O)c(-c4cc(C/C(=N\O)C(=O)NCCc5ccc(O)c(Br)c5)cc(Br)c4O)c3)=N/O)cc2Br)c1)=N/O	5.67778
CHEMBL505637	2100	nM	O=C(NCCc1ccc(O)c(Br)c1)/C(Cc1cc(Br)c(O)c(-c2cc(C/C(=N/O)C(=O)NCCc3ccc(O)c(Br)c3)cc(Br)c2O)c1)=N\O	5.67778
CHEMBL4091626	2100	nM	C#Cc1cccc(Nc2ncnc3ccc(OCCCCOP(N)(=O)N(CCCl)CCCl)cc23)c1	5.67778
CHEMBL116525	2120	nM	CC#CC(=O)Nc1cc2c(Nc3cccc(Br)c3)c(C#N)cnc2cc1OC	5.67366
CHEMBL1928959	2138	nM	O=C(COc1cc(F)c(F)c(F)c1)Nc1cccc(Oc2cc(Nc3ccc(OCc4cccc(F)c4)c(Cl)c3)ncn2)c1	5.66999
CHEMBL290106	2147	nM	Oc1c(Cl)cc(Cl)cc1Sc1cc(Cl)cc(Cl)c1O	5.66817
CHEMBL1173718	2150	nM	Cc1ncc([N+](=O)[O-])n1CCOC(=O)/C=C/c1ccc(-c2ccccc2)cc1	5.66756
CHEMBL5193804	2170	nM	Fc1ccc(NCc2coc(/C=C/c3ccc(C(F)(F)F)cc3)n2)cc1	5.66354
CHEMBL593292	2200	nM	COc1cc2ncnc(Nc3ccc(-c4nc5ccccc5s4)cc3)c2cc1OCCCN1CCN(C)CC1	5.65758
CHEMBL5171924	2210	nM	COc1ccccc1-c1ccc2c(ccn2Cc2coc(/C=C/c3ccc(C(F)(F)F)cc3)n2)c1	5.65561
CHEMBL590526	2210	nM	O=C(Nc1ccccc1)N(Cc1ccc(O)cc1)Cc1cc(Cl)cc(Cl)c1O	5.65561
CHEMBL2221249	2227	nM	CC(C)CCCCC(=O)N[C@@H](CCN)C(=O)N[C@@H](CN[C@@H](CCN)C(=O)N[C@H]1CCNC(=O)[C@H]([C@@H](C)O)NC(=O)[C@H](CCN)NC(=O)[C@H](CCN)NC(=O)[C@H](CC(C)C)NC(=O)[C@@H](CC(C)C)NC(=O)[C@H](CCN)NC1=O)[C@@H](C)O.CCC(C)CCCCC(=O)N[C@@H](CCN)C(=O)N[C@@H](CN[C@@H](CCN)C(=O)N[C@H]1CCNC(=O)[C@H]([C@@H](C)O)NC(=O)[C@H](CCN)NC(=O)[C@H](CCN)NC(=O)[C@H](CC(C)C)NC(=O)[C@@H](CC(C)C)NC(=O)[C@H](CCN)NC1=O)[C@@H](C)O	5.65228
CHEMBL2316777	2230	nM	Cc1ccc(C2=NN(c3nc(-c4ccc(Br)cc4)cs3)C(c3ccc4c(c3)OCO4)C2)cc1	5.6517
CHEMBL1958212	2240	nM	Cc1ccc(C2=NN(C3=NC(=O)CS3)C(c3ccccc3)C2)cc1	5.64975
CHEMBL592004	2240	nM	Oc1ccc(CN(Cc2cc(Br)cc(Br)c2O)C(=S)Nc2ccccc2)cc1	5.64975
CHEMBL1081849	2240	nM	Cc1c(C(=O)NCCCN2CCN(C)CC2)[nH]c2cnnc(Nc3ccc(OCc4cccc(F)c4)c(Cl)c3)c12	5.64975
CHEMBL5181577	2250	nM	FC(F)(F)c1ccc(/C=C/c2nc(Cn3ccc4cc(-c5cccc(Cl)c5)ccc43)co2)cc1	5.64782
CHEMBL592211	2270	nM	O=C(Nc1ccccc1)N(Cc1ccc(O)cc1)Cc1cccc(Cl)c1O	5.64397
CHEMBL4516736	2280	nM	N#Cc1ccc(-c2csc(N3N=C(c4ccc(N5CCOCC5)cc4)CC3c3ccc(Cl)cc3)n2)cc1	5.64207
CHEMBL1165468	2290	nM	CCOC(=O)c1cc2cc(Nc3ncnc4cc(OCCCN(CC)CC)c(OC)cc34)ccc2s1	5.64016
CHEMBL593294	2300	nM	COc1cc2ncnc(Nc3ccc(-c4nc5ccccc5s4)cc3O)c2cc1OCCCN1CCN(C)CC1	5.63827
CHEMBL593275	2300	nM	COc1cc2c(Nc3ccc(-c4nc5ccc(Cl)cc5s4)cc3)ncnc2cc1OCCCN1CCN(C)CC1	5.63827
CHEMBL589589	2320	nM	CC(C)c1ccc(NC(=O)c2ccc(N(CCCl)CCCl)cc2)cc1	5.63451
CHEMBL2325091	2320	nM	Brc1ccc(C2=NN(c3ccccc3)C(c3cccc4ccccc34)C2)cc1	5.63451
CHEMBL2316793	2380	nM	Clc1ccc(C2=NN(c3nc(-c4ccc(Br)cc4)cs3)C(c3ccc4c(c3)OCO4)C2)cc1	5.62342
CHEMBL194160	2400	nM	CCc1c(CC(N)=O)cn2ncnc(Nc3ccc4c(cnn4Cc4ccccc4)c3)c12	5.61979
CHEMBL594228	2400	nM	COc1cc2c(Nc3ccc(-c4nc5ccccc5s4)cc3F)ncnc2cc1OCCCN1CCN(C)CC1	5.61979
CHEMBL4087646	2400	nM	NP(=O)(OCCCCOc1ccc2ncnc(Nc3ccc(F)c(Cl)c3)c2c1)N(CCCl)CCCl	5.61979
CHEMBL1928944	2421	nM	O=[N+]([O-])c1cccc(Oc2cc(Nc3ccc(OCc4cccc(F)c4)c(Cl)c3)ncn2)c1	5.61601
CHEMBL591910	2430	nM	O=C1CSC(N/N=C/c2ccc(Br)cc2)=N1	5.61439
CHEMBL12131	2468	nM	Cc1cc(C(C#N)c2ccc(Cl)cc2)c(Cl)cc1NC(=O)c1cc(I)cc(I)c1O	5.60765
CHEMBL53463	2485	nM	COc1cccc2c1C(=O)c1c(O)c3c(c(O)c1C2=O)C[C@@](O)(C(=O)CO)C[C@@H]3O[C@H]1C[C@H](N)[C@H](O)[C@H](C)O1	5.60467
CHEMBL4084996	2500	nM	Clc1ccc(-c2nnc(Cc3nc4ccc(Cl)cc4[nH]3)o2)cc1	5.60206
CHEMBL195029	2500	nM	COc1cc(Nc2c(C#N)cnc3cc4cc(OCCN5CCOCC5)c(OC)cc4cc23)c(Cl)cc1Cl	5.60206
CHEMBL4097245	2500	nM	NP(=O)(OCCCC(=O)Oc1ccc2ncnc(Nc3ccc(F)c(Cl)c3)c2c1)N(CCCl)CCCl	5.60206
CHEMBL1958216	2520	nM	Cc1ccc(C2=NN(C3=NC(=O)CS3)C(c3ccc(C)cc3)C2)cc1	5.5986
CHEMBL589831	2580	nM	O=C(Nc1ccc(Br)cc1)c1ccc(N(CCCl)CCCl)cc1	5.58838
CHEMBL590714	2660	nM	O=C(Nc1ccccc1)N(Cc1ccc(O)cc1)Cc1cccc(Br)c1O	5.57512
CHEMBL447720	2660	nM	O=C(O[C@H]1CN[C@H](C#Cc2cc3ncnc(Nc4ccc5c(ccn5CCc5ccccc5)c4)c3s2)C1)N1CCOCC1	5.57512
CHEMBL4097795	2700	nM	NP(=O)(OCCCOc1ccc2ncnc(Nc3ccc(F)c(Cl)c3)c2c1)N(CCCl)CCCl	5.56864
CHEMBL3633938	2720	nM	N#CC(C#N)=CNc1ccc2ncnc(Nc3ccc(OCc4cccc(F)c4)c(Cl)c3)c2c1	5.56543
CHEMBL3746711	2750	nM	CC(=O)N1N=C(c2ccc(I)cc2)CC1c1ccc(C(=O)OCCn2c([N+](=O)[O-])cnc2C)cc1	5.56067
CHEMBL589823	2750	nM	O=C1CSC(N/N=C/c2ccc(Cl)cc2)=N1	5.56067
CHEMBL1958221	2750	nM	COc1ccc(C2=NN(C3=NC(=O)CS3)C(c3ccc(Br)cc3)C2)cc1	5.56067
CHEMBL1173814	2770	nM	COc1ccc(C2CC(c3ccc(C)c(C)c3)=NN2C(N)=S)cc1	5.55752
CHEMBL316127	2776	nM	O=C(/C=C/CN1CCOCC1)Nc1ccc2ncnc(Nc3cccc(Br)c3)c2c1	5.55658
CHEMBL5186298	2790	nM	FC(F)(F)c1ccc(/C=C/c2nc(CNc3ccccc3Cl)co2)cc1	5.5544
CHEMBL196018	2800	nM	CCOC(=O)c1cn2ncnc(Nc3ccc(F)c(Cl)c3)c2c1CC	5.55284
CHEMBL360190	2800	nM	O=C1N/C=C/c2ccc(c(Br)c2)Oc2cc(cc(Br)c2O)CCNC(=O)/C(=N/O)Cc2ccc(c(Br)c2)Oc2cc(cc(Br)c2O)C/C1=N\O	5.55284
CHEMBL93537	2808	nM	O=C(/C=C/CN1CCSCC1)Nc1ccc2ncnc(Nc3cccc(Br)c3)c2c1	5.5516
CHEMBL3218001	2900	nM	C#Cc1cccc(Nc2ncnc3ccc(S(=O)(=O)n4ccc(/C=C/C(=O)Nc5ccccc5N)c4)cc23)c1	5.5376
CHEMBL1683956	2900	nM	CCc1ncnc(Nc2ccc(OCc3cccc(F)c3)c(Cl)c2)c1C	5.5376
CHEMBL2112369	2921	nM	COC[C@@H]1CCCN1C/C=C\C(=O)Nc1ccc2ncnc(Nc3cccc(Br)c3)c2c1	5.53447
CHEMBL83	2949	nM	CC/C(=C(\c1ccccc1)c1ccc(OCCN(C)C)cc1)c1ccccc1	5.53033
CHEMBL114728	2970	nM	CCOc1cc2ncc(C#N)c(Nc3cccc(Br)c3)c2cc1NC(=O)/C=C/CN(C)C	5.52724
CHEMBL370934	3000	nM	CCOC(=O)c1cn2ncnc(Nc3cccc(Br)c3)c2c1CC	5.52288
CHEMBL2205026	3000	nM	N#Cc1ccc2c(c1)S(=O)(=O)N=S2c1ccc(Br)cc1	5.52288
CHEMBL56879	3000	nM	N#C/C(=C\c1ccc(O)c(O)c1)C(=O)c1ccc([N+](=O)[O-])cc1	5.52288
CHEMBL2325092	3010	nM	COc1ccc(C2=NN(c3ccccc3)C(c3cccc4ccccc34)C2)cc1	5.52143
CHEMBL245967	3030	nM	CCNCc1cncc(/C=C/c2c[nH]nc2-c2nc3ccc(OC)cc3[nH]2)c1	5.51856
CHEMBL1958022	3050	nM	O=C1CSC(N2N=C(c3ccccc3)CC2c2ccc(Br)cc2)=N1	5.5157
CHEMBL2325090	3070	nM	Clc1ccc(C2=NN(c3ccccc3)C(c3cccc4ccccc34)C2)cc1	5.51286
CHEMBL5174515	3070	nM	COc1ccccc1NCc1coc(/C=C/c2ccc(C(F)(F)F)cc2)n1	5.51286
CHEMBL518803	3100	nM	c1ccc2sc(-c3ccc(Nc4ncnc5[nH]ccc45)cc3)nc2c1	5.50864
CHEMBL1958214	3110	nM	Cc1ccc(C2=NN(C3=NC(=O)CS3)C(c3ccc(Cl)cc3)C2)cc1	5.50724
CHEMBL4061382	3200	nM	NP(=O)(OCCCC(=O)Oc1ccc2ncnc(Nc3ccc(OCc4cccc(F)c4)c(Cl)c3)c2c1)N(CCCl)CCCl	5.49485
CHEMBL3902295	3200	nM	O=C(CCl)OCCn1c(=O)oc2cc3ncnc(Nc4ccc(F)c(F)c4)c3cc21	5.49485
CHEMBL5193926	3250	nM	COc1cccc(-c2ccc3c(ccn3Cc3coc(/C=C/c4ccc(C(F)(F)F)cc4)n3)c2)c1	5.48812
CHEMBL2324872	3280	nM	COc1ccc(C2=NN(C(N)=S)C(c3ccc4ccccc4c3)C2)cc1	5.48413
CHEMBL3632637	3290	nM	CCOC(=O)C(=CNc1ccc2ncnc(Nc3ccc(OCc4ccccn4)c(Cl)c3)c2c1)C(=O)OCC	5.4828
CHEMBL372112	3300	nM	CCOC(=O)c1cn2ncnc(Nc3ccc4[nH]ncc4c3)c2c1CC	5.48149
CHEMBL496	3318.8	nM	Oc1c(Cl)cc(Cl)c(Cl)c1Cc1c(O)c(Cl)cc(Cl)c1Cl	5.47902
CHEMBL589830	3330	nM	O=C(Nc1ccc(Cl)cc1)c1ccc(N(CCCl)CCCl)cc1	5.47756
CHEMBL258940	3400	nM	CN1CCC(Nc2ncc3ncnc(Nc4ccc(F)c(Cl)c4)c3n2)CC1	5.46852
CHEMBL3218002	3400	nM	C#Cc1cccc(Nc2ncnc3ccc(S(=O)(=O)n4ccc(/C=C/C(=O)NO)c4)cc23)c1	5.46852
CHEMBL1828863	3410	nM	Cc1ncc([N+](=O)[O-])n1CC(=O)NS(=O)(=O)c1ccc(Cl)cc1	5.46725
CHEMBL3746212	3450	nM	CC(=O)N1N=C(c2ccc(Br)cc2)CC1c1ccc(C(=O)OCCn2c([N+](=O)[O-])cnc2C)cc1	5.46218
CHEMBL592426	3450	nM	O=C(Nc1ccccc1)N(Cc1ccc(F)cc1)Cc1cccc(Cl)c1O	5.46218
CHEMBL1173783	3460	nM	Cc1ncc([N+](=O)[O-])n1CCOC(=O)/C=C/c1ccc(OCc2ccccc2)cc1	5.46092
CHEMBL382125	3500	nM	CCCCn1c(Sc2cc(OC)ccc2OC)nc2c(N)ncnc21	5.45593
CHEMBL1958213	3530	nM	Cc1ccc(C2=NN(C3=NC(=O)CS3)C(c3ccc(F)cc3)C2)cc1	5.45223
CHEMBL3746642	3530	nM	CC(=O)N1N=C(c2ccc([N+](=O)[O-])cc2)CC1c1ccc(C(=O)OC(C)Cn2c([N+](=O)[O-])cnc2C)cc1	5.45223
CHEMBL6246	3540	nM	O=c1oc2c(O)c(O)cc3c(=O)oc4c(O)c(O)cc1c4c23	5.451
CHEMBL5180538	3580	nM	FC(F)(F)c1ccc(/C=C/c2nc(Cn3ccc4cc(-c5ccc(Cl)cc5)ccc43)co2)cc1	5.44612
CHEMBL1828864	3590	nM	Cc1ncc([N+](=O)[O-])n1CC(=O)NS(=O)(=O)c1ccc(Br)cc1	5.44491
CHEMBL2325089	3590	nM	Fc1ccc(C2=NN(c3ccccc3)C(c3cccc4ccccc34)C2)cc1	5.44491
CHEMBL602328	3590	nM	O=C1CSC(N/N=C/c2cc(F)ccc2O)=N1	5.44491
CHEMBL595142	3600	nM	COc1cc2c(Nc3ccc(-c4nc5ccccc5s4)cc3O)ncnc2cc1OCCCN1CCN(C)CC1	5.4437
CHEMBL248712	3600	nM	CCNCc1cncc(-c2cnc3[nH]nc(-c4nc5cc(F)c(F)cc5[nH]4)c3c2)c1	5.4437
CHEMBL1958209	3650	nM	O=C1CSC(N2N=C(c3ccc(Br)cc3)CC2c2ccc(Br)cc2)=N1	5.43771
CHEMBL590875	3730	nM	O=C1CSC(N/N=C/c2cc(Br)cc(Br)c2O)=N1	5.42829
CHEMBL1928954	3740	nM	O=C(/C=C/c1ccccc1)Nc1cccc(Oc2cc(Nc3ccc(OCc4cccc(F)c4)c(Cl)c3)ncn2)c1	5.42713
CHEMBL1683960	3750	nM	Cc1ncnc(Nc2ccc(OCc3cccc(F)c3)c(Cl)c2)c1-c1cccc(CN2CCOCC2)c1	5.42597
CHEMBL205870	3800	nM	C#Cc1cncnc1Nc1ccc(OCc2cccc(F)c2)c(Cl)c1	5.42022
CHEMBL65376	3800	nM	O=C(CCCC(=O)Oc1ccc(/C=C/[N+](=O)[O-])cc1)OCc1ccco1	5.42022
CHEMBL400906	3820	nM	CNCc1cncc(-c2cnc3[nH]nc(-c4nc5cc(OC(F)(F)F)ccc5[nH]4)c3c2)c1	5.41794
CHEMBL2325088	3830	nM	c1ccc(C2=NN(c3ccccc3)C(c3cccc4ccccc34)C2)cc1	5.4168
CHEMBL1958034	3840	nM	O=C1CSC(N2N=C(c3ccc(Cl)cc3)CC2c2ccc(Br)cc2)=N1	5.41567
CHEMBL1080271	3840	nM	CCN(CC)CCNC(=O)c1cc2cnnc(Nc3ccc(OCc4cccc(F)c4)c(Cl)c3)c2[nH]1	5.41567
CHEMBL283682	3870	nM	CC#CC(=O)Nc1ccc2ncc(C#N)c(Nc3cccc(Br)c3)c2c1	5.41229
CHEMBL2324870	3870	nM	NC(=S)N1N=C(c2ccc(Cl)cc2)CC1c1ccc2ccccc2c1	5.41229
CHEMBL589822	3890	nM	O=C1CSC(N/N=C/c2ccc(F)cc2)=N1	5.41005
CHEMBL592711	3890	nM	O=C(Nc1ccc(F)cc1)c1ccc(N(CCCl)CCCl)cc1	5.41005
CHEMBL3981210	3900	nM	COc1ccc(COc2ccc(Nc3ncnc4cc5oc(=O)n(CCOC(=O)CBr)c5cc34)cc2)cc1	5.40894
CHEMBL1256417	4030	nM	Cc1cc(C)c2oc(Nc3ccc(-c4nn([C@H]5CC[C@@H](N6CCN(C)CC6)CC5)c5ncnc(N)c45)cc3F)nc2c1	5.39469
CHEMBL3747281	4070	nM	CC(=O)N1N=C(c2ccc(F)cc2)CC1c1ccc(C(=O)OCCn2c([N+](=O)[O-])cnc2C)cc1	5.39041
CHEMBL3325478	4100	nM	CCOC(=O)C1=C(N)N(c2cccnc2)C2=C(C(=O)CCC2)C1c1cc2cc(C)ccc2n2nnnc12	5.38722
CHEMBL3747277	4100	nM	CC(=O)N1N=C(c2ccc(Cl)cc2)CC1c1ccc(C(=O)OCCn2c([N+](=O)[O-])cnc2C)cc1	5.38722
CHEMBL1958218	4120	nM	COc1ccc(C2=NN(C3=NC(=O)CS3)C(c3ccccc3)C2)cc1	5.3851
CHEMBL255866	4123	nM	CO/N=C/c1c(N)ncnc1Nc1ccc2[nH]ncc2c1	5.38479
CHEMBL421047	4130	nM	CN(C)C/C=C/C(=O)Nc1cc2c(Nc3ccc(F)c(Cl)c3)c(C#N)cnc2cc1OC(F)(F)F	5.38405
CHEMBL30973	4160	nM	CN(C)C/C=C/C(=O)Nc1ccc2ncc(C#N)c(Nc3cccc(Br)c3)c2c1	5.38091
CHEMBL429478	4170	nM	CCNCc1cncc(-c2cnc3[nH]nc(-c4nc5cc(OC)ccc5[nH]4)c3c2)c1	5.37986
CHEMBL2325106	4180	nM	COc1ccc(C2=NN(C(N)=S)C(c3cccc4ccccc34)C2)cc1	5.37882
CHEMBL94123	4182	nM	O=C(/C=C/N1CCOCC1)Nc1ccc2ncnc(Nc3cccc(Br)c3)c2c1	5.37862
CHEMBL1828860	4210	nM	Cc1ncc([N+](=O)[O-])n1CC(=O)NS(=O)(=O)c1ccccc1	5.37572
CHEMBL5189379	4346	nM	CN1CCN(C(C)(C)/C=C(\C#N)C(=O)N2CCC[C@@H](n3nc(-c4ccc(Oc5ccccc5)cc4F)c4c(N)ncnc43)C2)CC1	5.36191
CHEMBL114392	4390	nM	C=C(CN1CCOCC1)C(=O)Nc1ccc2ncc(C#N)c(Nc3ccc(F)c(Cl)c3)c2c1	5.35754
CHEMBL304442	4400	nM	O=C(CCCC(=O)Oc1ccc(/C=C/[N+](=O)[O-])cc1)Oc1ccccc1	5.35655
CHEMBL114490	4490	nM	COc1cc2ncc(C#N)c(Nc3ccc(F)c(Cl)c3)c2cc1NC(=O)/C=C/CN(C)C	5.34775
CHEMBL3142195	4500	nM	CC(C)O[C@@H]1[C@H](OC(C)C)[C@@H](COC(=O)CCCC(=O)Oc2ccc(/C=C/[N+](=O)[O-])cc2)O[C@H]1n1cnc2c(N)ncnc21	5.34679
CHEMBL2333164	4500	nM	O=C1NCCc2ccc(O)c(c2)Oc2c(Br)cc(cc2Br)CCNC(=O)/C(=N/O)Cc2cc(Br)c(O)c(c2)Oc2c(Br)cc(cc2Br)C/C1=N\O	5.34679
CHEMBL326811	4500	nM	C/C=C/C(=O)Nc1ccc2ncc(C#N)c(Nc3cccc(Br)c3)c2c1	5.34679
CHEMBL592481	4510	nM	O=C1CSC(N/N=C/c2cc(Cl)cc(Cl)c2O)=N1	5.34582
CHEMBL601828	4530	nM	O=C(Nc1ccccc1)N(Cc1ccc(O)cc1)Cc1cc(Br)cc(Br)c1O	5.3439
CHEMBL1958023	4640	nM	Cc1ccc(C2CC(c3ccccc3)=NN2C2=NC(=O)CS2)cc1	5.33348
CHEMBL1173651	4650	nM	Cc1ncc([N+](=O)[O-])n1CCOC(=O)/C=C/c1ccc(Br)cc1	5.33255
CHEMBL324718	4680	nM	C=CC(=O)Nc1cc2c(Nc3cccc(Br)c3)c(C#N)cnc2cc1OC	5.32975
CHEMBL4079125	4700	nM	Clc1ccc(-c2nnc(Cc3nc4ccccc4[nH]3)o2)c(Cl)c1	5.3279
CHEMBL3891774	4700	nM	O=C(Nc1ccc(Nc2ncnc3cc4oc(=O)n(CCOC(=O)CBr)c4cc23)cc1)NC1CCCCC1	5.3279
CHEMBL1828861	4760	nM	Cc1ccc(S(=O)(=O)NC(=O)Cn2c([N+](=O)[O-])cnc2C)cc1	5.32239
CHEMBL1172803	4770	nM	Cc1ncc([N+](=O)[O-])n1CCOC(=O)/C=C/c1ccc(Cl)cc1	5.32148
CHEMBL2070198	4800	nM	Brc1cccc(Nc2ncnc3ccc(NCc4ccc5c(c4)OCCCO5)cc23)c1	5.31876
CHEMBL1958021	4830	nM	O=C1CSC(N2N=C(c3ccccc3)CC2c2ccc(Cl)cc2)=N1	5.31605
CHEMBL5174439	4860	nM	FC(F)(F)c1ccc(/C=C/c2nc(Cn3ccc4cc(-c5ccc(Br)cc5)ccc43)co2)cc1	5.31336
CHEMBL1958037	4870	nM	O=C1CSC(N2N=C(c3ccc(Br)cc3)CC2c2ccccc2)=N1	5.31247
CHEMBL56542	4900	nM	N#C/C(=C\c1ccc(O)c(O)c1)C(=O)N1CCc2ccccc21	5.3098
CHEMBL425578	5000	nM	CCCCn1c(Cc2cc(OC)ccc2I)nc2c(N)ncnc21	5.30103
CHEMBL370808	5000	nM	COc1ccc(C#CC(C)(C)N)cc1-c1[nH]nc2nc(Nc3ccc(F)cc3F)ncc12	5.30103
CHEMBL1170278	5030	nM	Cc1ncc([N+](=O)[O-])n1CCOC(=O)/C=C/c1cccc2ccccc12	5.29843
CHEMBL92902	5042	nM	CN1CCC=C(C(=O)Nc2ccc3ncnc(Nc4cccc(Br)c4)c3c2)C1	5.2974
CHEMBL3633936	5050	nM	CCOC(=O)C(=CNc1ccc2ncnc(Nc3ccc(OCc4cccc(F)c4)c(Cl)c3)c2c1)C(=O)OCC	5.29671
CHEMBL1958019	5120	nM	O=C1CSC(N2N=C(c3ccccc3)CC2c2ccccc2)=N1	5.29073
CHEMBL248713	5120	nM	CCNCc1cncc(-c2cnc3[nH]nc(-c4nc5cc(F)ccc5[nH]4)c3c2)c1	5.29073
CHEMBL592427	5170	nM	O=C(Nc1ccccc1)N(Cc1ccc(F)cc1)Cc1cccc(Br)c1O	5.28651
CHEMBL3327179	5200	nM	N#CC1=C(N)N(c2cccnc2)C2=C(C(=O)CCC2)C1c1cc2ccccc2n2nnnc12	5.284
CHEMBL364623	5200	nM	Cc1cc(Nc2ncc(C(=O)Nc3c(C)cccc3Cl)s2)nc(C)n1	5.284
CHEMBL3325474	5200	nM	COC(=O)C1=C(N)N(c2cccnc2)C2=C(C(=O)CCC2)C1c1cc2cc(C)ccc2n2nnnc12	5.284
CHEMBL255291	5220	nM	CO/N=C/c1c(N)ncnc1NCc1ccc(F)c(Cl)c1	5.28233
CHEMBL1256423	5230	nM	Cc1cc(Cl)c2oc(Nc3ccc(-c4nn([C@H]5CC[C@@H](N6CCN(C)CC6)CC5)c5ncnc(N)c45)cc3)nc2c1	5.2815
CHEMBL5183407	5260	nM	Fc1ccc(-c2ccc3c(ccn3Cc3coc(/C=C/c4ccc(C(F)(F)F)cc4)n3)c2)cc1	5.27901
CHEMBL195218	5300	nM	CONC(=O)c1cc(Nc2ncnn3cc(NC(=O)OCCCS(C)(=O)=O)c(C(C)C)c23)c(F)cc1F	5.27572
CHEMBL518983	5300	nM	CONC(=O)c1ccc(F)c(Nc2ncnn3cc(NC(=O)OCCCS(C)(=O)=O)c(C(C)C)c23)c1	5.27572
CHEMBL5206700	5300	nM	FC(F)(F)c1ccc(/C=C/c2nc(CNc3ccccc3)co2)cc1	5.27572
CHEMBL1683971	5380	nM	Cc1ncnc(Nc2ccc(OCc3cccc(F)c3)c(Cl)c2)c1C#CCN1CCOCC1	5.26922
CHEMBL5286730	5400	nM	Cc1ccc(NC(=O)CSc2nc3cc4ccccc4cc3c(=O)n2-c2ccc(S(N)(=O)=O)cc2)cc1C	5.26761
CHEMBL29197	5400	nM	COc1cc2ncnc(Nc3cccc(Br)c3)c2cc1OC	5.26761
CHEMBL2325104	5460	nM	NC(=S)N1N=C(c2ccc(Cl)cc2)CC1c1cccc2ccccc12	5.26281
CHEMBL3746421	5620	nM	CC(=O)N1N=C(c2ccc(C(F)(F)F)cc2)CC1c1ccc(C(=O)OC(C)Cn2c([N+](=O)[O-])cnc2C)cc1	5.25026
CHEMBL263788	5660	nM	COc1cc2ncc(C#N)c(Nc3cccc(Br)c3)c2cc1NC(=O)/C=C/CN(C)C	5.24718
CHEMBL2325109	5690	nM	NC(=S)N1N=C(c2ccccc2)CC1c1ccc2ccccc2c1	5.24489
CHEMBL77030	5700	nM	N#C/C(=C\c1ccc(O)c(O)c1)C(N)=S	5.24413
CHEMBL472544	5700	nM	Nc1ncnc(Nc2ccc(OCc3ccccc3)c(Cl)c2)c1C(=O)NNC(=O)CCN1CCOCC1	5.24413
CHEMBL5202630	5790	nM	Fc1ccccc1NCc1coc(/C=C/c2ccc(C(F)(F)F)cc2)n1	5.23732
CHEMBL592707	5830	nM	Cc1ccc(/C=N/NC2=NC(=O)CS2)cc1	5.23433
CHEMBL1172802	5840	nM	Cc1ncc([N+](=O)[O-])n1CCOC(=O)/C=C/c1ccc(F)cc1	5.23359
CHEMBL1958039	5870	nM	O=C1CSC(N2N=C(c3ccc(Br)cc3)CC2c2ccc(Cl)cc2)=N1	5.23136
CHEMBL595374	5900	nM	COc1cc2ncnc(Nc3ccc(-c4nc5ccccc5s4)cc3C)c2cc1OCCCN1CCN(C)CC1	5.22915
CHEMBL1016	5947.2	nM	CCOc1nc2cccc(C(=O)O)c2n1Cc1ccc(-c2ccccc2-c2nnn[nH]2)cc1	5.22569
CHEMBL24944	5970	nM	O=C(Nc1ccc(Br)cc1)c1cc(Br)cc(Br)c1O	5.22403
CHEMBL4078431	6000	nM	COc1cc2ncnc(Nc3cccc(Br)c3)c2cc1OCCCOP(N)(=O)N(CCCl)CCCl	5.22185
CHEMBL459729	6000	nM	Cc1cc(C2CCN(CCCF)CC2)cc2[nH]c(-c3c(NCCn4cc(Cl)cn4)cc[nH]c3=O)nc12	5.22185
CHEMBL1093235	6000	nM	O=[N+]([O-])c1cccc(-c2nc3sccn3c2-c2ccnc(Nc3ccccc3)n2)c1	5.22185
CHEMBL1365395	6029	nM	Cc1ccc2c(C)nc(Nc3nc(O)cc(CSc4nnnn4-c4ccccc4)n3)nc2c1	5.21975
CHEMBL3917657	6200	nM	CC(C)(C)c1ccc(Nc2ncnc3cc4oc(=O)n(CCOC(=O)CBr)c4cc23)cc1	5.20761
CHEMBL1958024	6210	nM	COc1ccc(C2CC(c3ccccc3)=NN2C2=NC(=O)CS2)cc1	5.20691
CHEMBL1958217	6230	nM	COc1ccc(C2CC(c3ccc(C)cc3)=NN2C2=NC(=O)CS2)cc1	5.20551
CHEMBL1958028	6240	nM	O=C1CSC(N2N=C(c3ccc(F)cc3)CC2c2ccc(Br)cc2)=N1	5.20482
CHEMBL1683950	6300	nM	Fc1cccc(COc2ccc(Nc3cc(-c4ccccc4)ncn3)cc2Cl)c1	5.20066
CHEMBL1958020	6350	nM	O=C1CSC(N2N=C(c3ccccc3)CC2c2ccc(F)cc2)=N1	5.19723
CHEMBL296407	6400	nM	N#C/C(=C\c1ccc(O)c(O)c1)C(N)=O	5.19382
CHEMBL592200	6490	nM	Oc1c(Cl)cc(Cl)cc1CN(Cc1ccc(F)cc1)C(=S)Nc1ccccc1	5.18776
CHEMBL4094471	6500	nM	Clc1ccccc1-c1nnc(Cc2nc3ccccc3[nH]2)o1	5.18709
CHEMBL1683949	6500	nM	Cc1cc(Nc2ccc(OCc3cccc(F)c3)c(Cl)c2)ncn1	5.18709
CHEMBL2070191	6500	nM	Clc1cccc(Nc2ncnc3ccc(NCc4ccc5c(c4)OCO5)cc23)c1	5.18709
CHEMBL249304	6510	nM	CN1CCN(c2ccc3[nH]c(-c4n[nH]c5ncc(-c6cncc7ccccc67)cc45)nc3c2)CC1	5.18642
CHEMBL3133831	6530	nM	CCOc1cccc(Nc2ccnc3[nH]c4ccc(S(=O)(=O)N5CCN(CCO)CC5)cc4c23)c1	5.18509
CHEMBL1173667	6580	nM	NC(=S)N1N=C(c2ccc(Cl)c(Cl)c2)CC1c1ccc(O)cc1	5.18177
CHEMBL63559	6600	nM	COc1ccc(OC(=O)CCCC(=O)Oc2ccc(/C=C/[N+](=O)[O-])cc2)cc1	5.18046
CHEMBL428206	6600	nM	N#Cc1n[nH]nc1-c1ccc(Oc2ccccc2)cc1	5.18046
CHEMBL2325107	6680	nM	Cc1ccc(C2=NN(C(N)=S)C(c3cccc4ccccc34)C2)cc1	5.17522
CHEMBL592201	6730	nM	Oc1c(Br)cc(Br)cc1CN(Cc1ccc(F)cc1)C(=S)Nc1ccccc1	5.17198
CHEMBL2325108	6840	nM	NC(=S)N1N=C(c2ccc(Cl)c(Cl)c2)CC1c1cccc2ccccc12	5.16494
CHEMBL590876	6930	nM	O=C1CSC(N/N=C/c2ccc(O)cc2)=N1	5.15927
CHEMBL604992	6950	nM	COc1cc2c(Nc3ccc(-c4nc5ccc(F)cc5s4)cc3)ncnc2cc1OCCCN1CCN(C)CC1	5.15802
CHEMBL4516916	6960	nM	Fc1ccc(-c2csc(N3N=C(c4ccc(N5CCOCC5)cc4)CC3c3ccc(Cl)cc3)n2)cc1	5.15739
CHEMBL510730	7000	nM	O=C1NCCc2cc(Br)c(O)c(c2)Oc2c(Br)cc(cc2Br)CCNC(=O)/C(=N/O)Cc2cc(Br)c(O)c(c2)Oc2c(Br)cc(cc2Br)C/C1=N\O	5.1549
CHEMBL85021	7000	nM	CC(C)c1cc(/C=C2\C(=O)Nc3ccccc32)cc(C(C)C)c1O	5.1549
CHEMBL1828867	7020	nM	O=C(Cc1ccc(F)cc1)NS(=O)(=O)c1ccc(F)cc1	5.15366
CHEMBL1958210	7040	nM	Cc1ccc(C2CC(c3ccc(Br)cc3)=NN2C2=NC(=O)CS2)cc1	5.15243
CHEMBL1958031	7050	nM	O=C1CSC(N2N=C(c3ccc(Cl)cc3)CC2c2ccccc2)=N1	5.15181
CHEMBL604785	7130	nM	Cc1cccc(CN(Cc2ccc(O)cc2)C(=S)Nc2ccccc2)c1O	5.14691
CHEMBL371863	7200	nM	CCOC(=O)c1cn2ncnc(NCc3ccccc3)c2c1CC	5.14267
CHEMBL2325102	7240	nM	NC(=S)N1N=C(c2ccccc2)CC1c1cccc2ccccc12	5.14026
CHEMBL1958222	7350	nM	COc1ccc(C2=NN(C3=NC(=O)CS3)C(c3ccc(C)cc3)C2)cc1	5.13371
CHEMBL3809172	7400	nM	O=C1N=C(C(=O)c2c[nH]c3ccccc23)N/C1=C\c1c[nH]c2cc(O)ccc12	5.13077
CHEMBL4869634	7491	nM	CC(C)Oc1cc(F)ccc1Nc1ncnc2ccc(-c3ccc(C(=O)N4CCNCC4)cc3)nc12	5.12546
CHEMBL1828868	7560	nM	O=C(Cc1ccc(F)cc1)NS(=O)(=O)c1ccc(Cl)cc1	5.12148
CHEMBL5180660	7590	nM	FC(F)(F)c1ccc(/C=C/c2nc(Cn3ccc4cc(-c5ccccc5)ccc43)co2)cc1	5.11976
CHEMBL1958220	7590	nM	COc1ccc(C2=NN(C3=NC(=O)CS3)C(c3ccc(Cl)cc3)C2)cc1	5.11976
CHEMBL489083	7700	nM	N=C(N)SCCCn1c(=O)c2c(c1=O)n1c3ccccc3cc1c1cccc3ccn2c31	5.11351
CHEMBL424252	7800	nM	CCN(CC)C/C=C/C(=O)Nc1cc2c(Nc3ccc(F)c(Cl)c3)c(C#N)cnc2cc1OC	5.10791
CHEMBL3651854	7800	nM	Cc1cc(Nc2nc(Nc3ccccc3S(=O)(=O)C(C)C)c3c(C)[nH]nc3n2)c(OC(C)C)cc1C1CCN(C)CC1	5.10791
CHEMBL238828	7900	nM	N#Cc1n[nH]nc1-c1ccc(Br)cc1	5.10237
CHEMBL201772	8000	nM	CCCCn1c(Cc2cc(OC)ccc2Br)nc2c(N)ncnc21	5.09691
CHEMBL3633939	8000	nM	N#CC(C#N)=CNc1ccc2ncnc(Nc3ccc(OCc4ccccn4)c(Cl)c3)c2c1	5.09691
CHEMBL365318	8000	nM	CONC(=O)c1cc(Nc2ncnn3cc(-c4nnc(C)o4)c(C(C)C)c23)c(F)cc1F	5.09691
CHEMBL1958219	8040	nM	COc1ccc(C2=NN(C3=NC(=O)CS3)C(c3ccc(F)cc3)C2)cc1	5.09474
CHEMBL1958035	8130	nM	Cc1ccc(C2CC(c3ccc(Cl)cc3)=NN2C2=NC(=O)CS2)cc1	5.08991
CHEMBL1958038	8140	nM	O=C1CSC(N2N=C(c3ccc(Br)cc3)CC2c2ccc(F)cc2)=N1	5.08938
CHEMBL1828869	8180	nM	O=C(Cc1ccc(F)cc1)NS(=O)(=O)c1ccc(Br)cc1	5.08725
CHEMBL89723	8200	nM	CC(C)c1cc(/C=C2\C(=O)Nc3ccc(Cl)cc32)cc(C(C)C)c1O	5.08619
CHEMBL3747776	8270	nM	CC(=O)N1N=C(c2ccc(Br)cc2)CC1c1ccc(C(=O)OC(C)Cn2c([N+](=O)[O-])cnc2C)cc1	5.08249
CHEMBL1828865	8410	nM	O=C(Cc1ccc(F)cc1)NS(=O)(=O)c1ccccc1	5.0752
CHEMBL604671	8460	nM	O=C1CSC(N/N=C/c2ccc([N+](=O)[O-])cc2)=N1	5.07263
CHEMBL3747152	8540	nM	CC(=O)N1N=C(c2ccc(F)cc2)CC1c1ccc(C(=O)OC(C)Cn2c([N+](=O)[O-])cnc2C)cc1	5.06854
CHEMBL86754	8577	nM	Oc1c(I)cc(I)c2cccnc12	5.06666
CHEMBL5182590	8630	nM	Fc1cccc(NCc2coc(/C=C/c3ccc(C(F)(F)F)cc3)n2)c1	5.06399
CHEMBL5270270	8730	nM	COc1cc2ncnc(NCCOc3ccccc3F)c2cc1OC	5.05899
CHEMBL118000	8740	nM	N#Cc1cnc2ccc(NC(=O)/C=C/CN3CCOCC3)cc2c1Nc1ccc(F)c(Cl)c1	5.05849
CHEMBL4066118	8800	nM	c1ccc2c(Cc3nnc(Cc4nc5ccccc5[nH]4)o3)cccc2c1	5.05552
CHEMBL3133815	8830	nM	O=[N+]([O-])c1cccc(Nc2ccnc3[nH]c4ccc(Br)cc4c23)c1	5.05404
CHEMBL92882	8832	nM	COC/C=C/C(=O)Nc1ccc2ncnc(Nc3cccc(Br)c3)c2c1	5.05394
CHEMBL3325471	8900	nM	COc1ccc2c(c1)cc(C1C(C#N)=C(N)N(c3cccnc3)C3=C1C(=O)CCC3)c1nnnn12	5.05061
CHEMBL3325476	9000	nM	COC(=O)C1=C(N)N(c2cccnc2)C2=C(C(=O)CCC2)C1c1cc2cc(Cl)ccc2n2nnnc12	5.04576
CHEMBL633	9148	nM	CCCCc1oc2ccccc2c1C(=O)c1cc(I)c(OCCN(CC)CC)c(I)c1	5.03867
CHEMBL2325105	9150	nM	NC(=S)N1N=C(c2ccc(Br)cc2)CC1c1cccc2ccccc12	5.03858
CHEMBL592708	9170	nM	COc1ccc(/C=N/NC2=NC(=O)CS2)cc1	5.03763
CHEMBL1170459	9240	nM	Cc1ncc([N+](=O)[O-])n1CCOC(=O)/C=C/c1ccc2ccccc2c1	5.03433
CHEMBL1958211	9270	nM	COc1ccc(C2CC(c3ccc(Br)cc3)=NN2C2=NC(=O)CS2)cc1	5.03292
CHEMBL5193640	9280	nM	FC(F)(F)c1ccc(/C=C/c2nc(Cn3ccc4cc(-c5ccccc5Br)ccc43)co2)cc1	5.03245
CHEMBL394465	9300	nM	CN1CCN(c2ccc3nc(-c4n[nH]cc4/C=C/c4cccnc4)[nH]c3c2)CC1	5.03152
CHEMBL116857	9350	nM	COc1cc(NC(=O)/C=C/CN(C)C)cc2c(Nc3cccc(Br)c3)c(C#N)cnc12	5.02919
CHEMBL592247	9470	nM	Cc1cc(C)c(O)c(CN(Cc2ccc(O)cc2)C(=S)Nc2ccccc2)c1	5.02365
CHEMBL461140	9500	nM	CN(C)CCOc1ccc(/C=C/c2cc(-c3cc4c(=O)[nH]cnc4[nH]3)ccn2)cc1	5.02228
CHEMBL325156	9580	nM	CCN(CC)C(C)/C=C/C(=O)Nc1cc2c(Nc3ccc(F)c(Cl)c3)c(C#N)cnc2cc1OC	5.01863
CHEMBL589809	9640	nM	O=C(Nc1ccccc1)N(Cc1ccc(F)cc1)Cc1cc(Cl)cc(Cl)c1O	5.01592
CHEMBL1173653	9650	nM	Cc1ccc(/C=C/C(=O)OCCn2c([N+](=O)[O-])cnc2C)cc1	5.01547
CHEMBL369967	9700	nM	CCNCc1cn2ncnc(Nc3ccc4c(cnn4Cc4ccccc4)c3)c2c1CC	5.01323
CHEMBL4169245	9710	nM	O=S(=O)(NCCc1cccc(F)c1)c1cc(-c2ccccc2COc2cccc(C(F)(F)F)c2)cc(C(F)(F)F)c1	5.01278
CHEMBL604672	9950	nM	O=C(Nc1ccccc1Br)c1ccc(N(CCCl)CCCl)cc1	5.00218
CHEMBL3746168	9960	nM	CC(=O)N1N=C(c2ccc(Cl)cc2)CC1c1ccc(C(=O)OC(C)Cn2c([N+](=O)[O-])cnc2C)cc1	5.00174
CHEMBL1958033	9960	nM	O=C1CSC(N2N=C(c3ccc(Cl)cc3)CC2c2ccc(Cl)cc2)=N1	5.00174
CHEMBL1173714	9970	nM	Cc1ncc([N+](=O)[O-])n1CCOC(=O)/C=C/c1ccc(C(C)C)cc1	5.0013
CHEMBL1172957	10000	nM	NS(=O)(=O)c1ccc(Nc2nc(N3CCOCC3)nc3[nH]cnc23)cc1	5
CHEMBL462343	10000	nM	Nc1ncnc(Nc2ccc(OCc3ccccc3)c(Cl)c2)c1C(=O)NCCN1CCCCC1	5
CHEMBL518646	10000	nM	Nc1ncnc(Nc2ccc(OCc3ccccc3)c(Cl)c2)c1C(=O)NCCN1CCOCC1	5
CHEMBL54471	10000	nM	Cc1ccc(C(=O)/C(C#N)=C/c2ccc(O)c(O)c2)cc1	5
CHEMBL3884319	10000	nM	CC1(C)C(=O)N([C@H]2CCc3c(O)cccc32)c2nc(Nc3ccccc3)ncc21	5
CHEMBL5169997	10230	nM	FC(F)(F)c1ccc(/C=C/c2nc(Cn3ccc4cc(-c5ccccc5Cl)ccc43)co2)cc1	4.99012
CHEMBL1958029	10260	nM	Cc1ccc(C2CC(c3ccc(F)cc3)=NN2C2=NC(=O)CS2)cc1	4.98885
CHEMBL590524	10260	nM	O=C1CSC(N/N=C/c2cccc(Br)c2)=N1	4.98885
CHEMBL1958036	10340	nM	COc1ccc(C2CC(c3ccc(Cl)cc3)=NN2C2=NC(=O)CS2)cc1	4.98548
CHEMBL4173044	10400	nM	O=S(=O)(NCCc1cccc(F)c1)c1cc(-c2cccc3c2Sc2ccccc2S3)cc(C(F)(F)F)c1	4.98297
CHEMBL1958223	10480	nM	COc1ccc(C2=NN(C3=NC(=O)CS3)C(c3ccc(OC)cc3)C2)cc1	4.97964
CHEMBL1828866	10530	nM	Cc1ccc(S(=O)(=O)NC(=O)Cc2ccc(F)cc2)cc1	4.97757
CHEMBL1958025	10530	nM	O=C1CSC(N2N=C(c3ccc(F)cc3)CC2c2ccccc2)=N1	4.97757
CHEMBL2325103	10630	nM	NC(=S)N1N=C(c2ccc(F)cc2)CC1c1cccc2ccccc12	4.97347
CHEMBL1173652	10780	nM	Cc1ncc([N+](=O)[O-])n1CCOC(=O)/C=C/c1ccccc1	4.96738
CHEMBL1987813	10800	nM	O=C1C2=C(C(=O)c3c(O)ccc(O)c31)[C@@H](O)[C@@H](O)[C@@H](O)C2	4.96658
CHEMBL393014	11000	nM	N#Cc1n[nH]nc1-c1ccc(Cl)cc1	4.95861
CHEMBL1828872	11050	nM	O=C(Cc1ccc(Cl)cc1)NS(=O)(=O)c1ccc(F)cc1	4.95664
CHEMBL428647	11108	nM	CC(=O)O[C@H]1C(=O)[C@@]2(C)[C@H]([C@H](OC(=O)c3ccccc3)[C@]3(O)C[C@H](OC(=O)[C@H](O)[C@@H](NC(=O)c4ccccc4)c4ccccc4)C(C)=C1C3(C)C)[C@]1(OC(C)=O)CO[C@@H]1C[C@@H]2O	4.95436
CHEMBL4780210	11211.4	nM	Cc1ccc(C2=N/C(=C\c3ccc(Cl)cc3)C(=O)NN2C(=O)c2nc3c(c(C)nn3-c3ccccc3)c(=O)[nH]2)cc1	4.95034
CHEMBL1699836	11400	nM	O=C1C(CO)=C(CO)C(=O)c2c(O)ccc(O)c21	4.9431
CHEMBL113901	11820	nM	COc1cc2ncc(C#N)c(Nc3ccc(F)c(Cl)c3)c2cc1NC(=O)/C=C/C(C)N(C)C	4.92738
CHEMBL59145	12000	nM	N#C/C(=C\c1ccc(O)c(O)c1)C(=O)c1ccccc1Cl	4.92082
CHEMBL113194	12000	nM	CCCCn1c(Cc2cc(OC)ccc2OC)nc2c(N)ncnc21	4.92082
CHEMBL245770	12000	nM	COc1cncc(/C=C/c2c[nH]nc2-c2nc3ccc(OC)cc3[nH]2)c1	4.92082
CHEMBL3746387	12050	nM	COc1ccc(C2=NN(C(C)=O)C(c3ccc(C(=O)OC(C)Cn4c([N+](=O)[O-])cnc4C)cc3)C2)cc1	4.91901
CHEMBL5192580	12140	nM	Fc1ccccc1-c1ccc2c(ccn2Cc2coc(/C=C/c3ccc(C(F)(F)F)cc3)n2)c1	4.91578
CHEMBL3393072	12370	nM	O=C(Cc1c[nH]c2ccccc12)NNC(=S)Nc1ncccc1Br	4.90763
CHEMBL603186	12420	nM	O=C(Nc1ccccc1)N(Cc1ccc(F)cc1)Cc1cc(Br)cc(Br)c1O	4.90588
CHEMBL1958030	12430	nM	COc1ccc(C2CC(c3ccc(F)cc3)=NN2C2=NC(=O)CS2)cc1	4.90553
CHEMBL3746564	12660	nM	CC(=O)N1N=C(c2ccc(I)cc2)CC1c1ccc(C(=O)OC(C)Cn2c([N+](=O)[O-])cnc2C)cc1	4.89757
CHEMBL592710	12870	nM	O=C(Nc1ccccc1Cl)c1ccc(N(CCCl)CCCl)cc1	4.89042
CHEMBL1828870	13070	nM	O=C(Cc1ccc(Cl)cc1)NS(=O)(=O)c1ccccc1	4.88372
CHEMBL296419	13084	nM	COc1ccc(CCN2CCC(Nc3nc4ccccc4n3Cc3ccc(F)cc3)CC2)cc1	4.88326
CHEMBL3746268	13160	nM	CC(=O)N1N=C(c2ccc(C)cc2)CC1c1ccc(C(=O)OCCn2c([N+](=O)[O-])cnc2C)cc1	4.88074
CHEMBL1958027	13160	nM	O=C1CSC(N2N=C(c3ccc(F)cc3)CC2c2ccc(Cl)cc2)=N1	4.88074
CHEMBL86945	13200	nM	COc1ccc(/C=C2\C(=O)Nc3ccccc32)cc1C(C)(C)C	4.87943
CHEMBL605957	13316	nM	COc1cc(C2=C(c3c[nH]c4ccc(Br)cc34)C(=O)NC2=O)cc(OC)c1OC	4.87563
CHEMBL1828873	13320	nM	O=C(Cc1ccc(Cl)cc1)NS(=O)(=O)c1ccc(Cl)cc1	4.8755
CHEMBL5183228	13340	nM	Cc1ccccc1-c1ccc2c(ccn2Cc2coc(/C=C/c3ccc(C(F)(F)F)cc3)n2)c1	4.87484
CHEMBL56543	13500	nM	N#C/C(=C\c1ccc(O)c(O)c1)C(=O)NCc1ccccc1	4.86967
CHEMBL239895	13500	nM	CC(C)c1ccc(-c2n[nH]nc2C#N)cc1	4.86967
CHEMBL1828874	13560	nM	O=C(Cc1ccc(Cl)cc1)NS(=O)(=O)c1ccc(Br)cc1	4.86774
CHEMBL55204	13600	nM	N#C/C(=C\c1ccc(O)c(O)c1)C(=O)c1ccc(F)cc1	4.86646
CHEMBL808	13904	nM	Clc1ccc(COC(Cn2ccnc2)c2ccc(Cl)cc2Cl)cc1	4.85686
CHEMBL3747079	14040	nM	CC(=O)N1N=C(c2ccccc2)CC1c1ccc(C(=O)OCCn2c([N+](=O)[O-])cnc2C)cc1	4.85263
CHEMBL1173713	14320	nM	COc1ccc(/C=C/C(=O)OCCn2c([N+](=O)[O-])cnc2C)cc1	4.84406
CHEMBL592139	14340	nM	O=C1CSC(N/N=C/c2cccc(Cl)c2)=N1	4.84345
CHEMBL3325470	14800	nM	Cc1ccc2c(c1)cc(C1C(C#N)=C(N)N(c3cccnc3)C3=C1C(=O)CCC3)c1nnnn12	4.82974
CHEMBL3747407	14930	nM	CCOc1ccc(C2=NN(C(C)=O)C(c3ccc(C(=O)OCCn4c([N+](=O)[O-])cnc4C)cc3)C2)cc1	4.82594
CHEMBL597492	15180	nM	COc1cc(C2=C(c3c[nH]c4ccc(I)cc34)C(=O)NC2=O)cc(OC)c1OC	4.81873
CHEMBL86944	15200	nM	COc1c(Br)cc(/C=C2\C(=O)Nc3ccc(Cl)cc32)cc1C(C)(C)C	4.81816
CHEMBL92086	15238	nM	C=C(C)C(=O)Nc1ccc2ncnc(Nc3cccc(Br)c3)c2c1	4.81707
CHEMBL589825	15390	nM	O=C(Nc1ccccc1F)c1ccc(N(CCCl)CCCl)cc1	4.81276
CHEMBL1828871	15570	nM	Cc1ccc(S(=O)(=O)NC(=O)Cc2ccc(Cl)cc2)cc1	4.80771
CHEMBL93754	15624	nM	O=C(/C=C/Cn1cccn1)Nc1ccc2ncnc(Nc3cccc(Br)c3)c2c1	4.80621
CHEMBL589801	15660	nM	Cc1cccc(CN(Cc2ccc(F)cc2)C(=S)Nc2ccccc2)c1O	4.80521
CHEMBL428690	15800	nM	CN1CC[C@H](c2c(O)cc(O)c3c(=O)cc(-c4ccccc4Cl)oc23)[C@H](O)C1	4.80134
CHEMBL483085	16000	nM	N#C/C(=C\c1ccc(O)c(O)c1)C(=O)Nc1cccc(C(F)(F)F)c1	4.79588
CHEMBL589068	16120	nM	Cc1cc(C)c(O)c(CN(Cc2ccc(O)cc2)C(=O)Nc2ccccc2)c1	4.79263
CHEMBL86326	16200	nM	COc1ccc(/C=C2\C(=O)Nc3ccc(Cl)cc32)cc1C(C)(C)C	4.79048
CHEMBL1828877	16260	nM	O=C(Cc1ccc(Br)cc1)NS(=O)(=O)c1ccc(F)cc1	4.78888
CHEMBL1958032	16420	nM	O=C1CSC(N2N=C(c3ccc(Cl)cc3)CC2c2ccc(F)cc2)=N1	4.78463
CHEMBL393015	16600	nM	N#Cc1n[nH]nc1-c1ccc(Oc2ccccc2)c(F)c1	4.77989
CHEMBL1172951	16750	nM	Cc1ncc([N+](=O)[O-])n1CCOC(=O)/C=C/c1cccc(F)c1	4.77599
CHEMBL48760	16900	nM	CC(C)c1ccc(/C=C2/C(=O)Nc3ccccc32)cc1	4.77211
CHEMBL417941	17000	nM	N#C/C(=C\c1ccc(O)c(O)c1)C(=O)NC1CCCCC1	4.76955
CHEMBL3747570	17000	nM	CC(=O)N1N=C(c2ccccc2)CC1c1ccc(C(=O)OC(C)Cn2c([N+](=O)[O-])cnc2C)cc1	4.76955
CHEMBL401930	17100	nM	Cc1cc(N2CCOCC2)cc2[nH]c(-c3c(NC[C@@H](O)c4cccc(Cl)c4)cc[nH]c3=O)nc12	4.767
CHEMBL3747055	17250	nM	COc1ccc(C2=NN(C(C)=O)C(c3ccc(C(=O)OCCn4c([N+](=O)[O-])cnc4C)cc3)C2)cc1	4.76321
CHEMBL4162777	18000	nM	O=S(=O)(NCCc1cccc(F)c1)c1cc(-c2ccc(COc3cccc(C(F)(F)F)c3)cc2)cc(C(F)(F)F)c1	4.74473
CHEMBL56132	18000	nM	N#C/C(=C\c1ccc(O)c(O)c1)C(=O)c1ccccc1	4.74473
CHEMBL56393	18000	nM	N#C/C(=C\c1ccc(O)c(O)c1)C(=O)c1ccc(O)c(O)c1	4.74473
CHEMBL210638	18000	nM	COc1cc(C2CC(c3ccccc3O)=NN2)ccc1O	4.74473
CHEMBL3745929	18120	nM	CCOc1ccc(C2=NN(C(C)=O)C(c3ccc(C(=O)OC(C)Cn4c([N+](=O)[O-])cnc4C)cc3)C2)cc1	4.74184
CHEMBL1958026	18120	nM	O=C1CSC(N2N=C(c3ccc(F)cc3)CC2c2ccc(F)cc2)=N1	4.74184
CHEMBL590525	18430	nM	Cc1cccc(CN(Cc2ccc(O)cc2)C(=O)Nc2ccccc2)c1O	4.73447
CHEMBL4539558	18460	nM	N=C1NC(=O)/C(=C2/CCNC(=O)c3[nH]cc(Br)c32)N1	4.73377
CHEMBL1173014	18820	nM	COc1cccc(/C=C/C(=O)OCCn2c([N+](=O)[O-])cnc2C)c1	4.72538
CHEMBL3746980	18890	nM	CC(=O)N1N=C(c2ccc(C)cc2)CC1c1ccc(C(=O)OC(C)Cn2c([N+](=O)[O-])cnc2C)cc1	4.72377
CHEMBL10	18896	nM	C[S+]([O-])c1ccc(-c2nc(-c3ccc(F)cc3)c(-c3ccncc3)[nH]2)cc1	4.72363
CHEMBL1828878	18940	nM	O=C(Cc1ccc(Br)cc1)NS(=O)(=O)c1ccc(Cl)cc1	4.72262
CHEMBL87746	19000	nM	COc1c(Br)cc(/C=C2\C(=O)Nc3ccccc32)cc1C(C)(C)C	4.72125
CHEMBL1828875	19050	nM	O=C(Cc1ccc(Br)cc1)NS(=O)(=O)c1ccccc1	4.72011
CHEMBL4280835	19200	nM	CS(=O)(=O)Nc1ccc(-c2cc3c(Nc4ccc(Oc5cccc(C(F)(F)F)c5)c(Cl)c4)ncnc3s2)cc1	4.7167
CHEMBL3325472	19300	nM	N#CC1=C(N)N(c2cccnc2)C2=C(C(=O)CCC2)C1c1cc2cc(Cl)ccc2n2nnnc12	4.71444
CHEMBL1172950	19340	nM	Cc1ncc([N+](=O)[O-])n1CCOC(=O)/C=C/c1cccc([N+](=O)[O-])c1	4.71354
CHEMBL71	19366	nM	CN(C)CCCN1c2ccccc2Sc2ccc(Cl)cc21	4.71296
CHEMBL726	19570	nM	OCCN1CCN(CCCN2c3ccccc3Sc3ccc(C(F)(F)F)cc32)CC1	4.70841
CHEMBL1828879	19830	nM	O=C(Cc1ccc(Br)cc1)NS(=O)(=O)c1ccc(Br)cc1	4.70268
CHEMBL199865	20000	nM	CCCCn1c(Cc2cc(OC)ccc2Cl)nc2c(N)ncnc21	4.69897
CHEMBL1828876	20330	nM	Cc1ccc(S(=O)(=O)NC(=O)Cc2ccc(Br)cc2)cc1	4.69186
CHEMBL1829273	20450	nM	O=C(Cc1cccc(Br)c1)NS(=O)(=O)c1ccc(F)cc1	4.68931
CHEMBL4531006	20990	nM	N=C1NC(=O)/C(=C2/CCNC(=O)c3[nH]c(Br)c(Br)c32)N1	4.67799
CHEMBL71884	21000	nM	Cc1cc2nc(CBr)c(-c3ccccc3)nc2cc1C	4.67778
CHEMBL205652	21000	nM	Fc1cccc(COc2ccc(Nc3ccncn3)cc2Cl)c1	4.67778
CHEMBL113902	21510	nM	C/C=C/C(=O)Nc1cc2c(Nc3ccc(F)c(Cl)c3)c(C#N)cnc2cc1OCC	4.66736
CHEMBL329642	21657	nM	C/C=C\C(=O)Nc1ccc2ncnc(Nc3cccc(Br)c3)c2c1	4.6644
CHEMBL590877	21750	nM	O=C1CSC(N/N=C/c2cccc(F)c2)=N1	4.66254
CHEMBL314021	22500	nM	CN1C(=O)/C(=C\c2ccc(Br)cc2)c2ccccc21	4.64782
CHEMBL3325480	22700	nM	CCOC(=O)C1=C(N)N(c2cccnc2)C2=C(C(=O)CCC2)C1c1cc2cc(Cl)ccc2n2nnnc12	4.64397
CHEMBL589120	22750	nM	CN(C(=O)c1ccc(N(CCCl)CCCl)cc1)c1ccccc1	4.64302
CHEMBL293749	23000	nM	N#C/C(=C\c1ccc(O)c(O)c1)C(=O)NCCc1ccccc1	4.63827
CHEMBL1828882	23450	nM	COc1ccc(CC(=O)NS(=O)(=O)c2ccc(F)cc2)cc1	4.62986
CHEMBL1829274	23460	nM	O=C(Cc1cccc(Br)c1)NS(=O)(=O)c1ccc(Cl)cc1	4.62967
CHEMBL113985	23590	nM	COc1cc(NC(=O)/C=C/CN2CCOCC2)cc2c(Nc3cccc(Br)c3)c(C#N)cnc12	4.62727
CHEMBL4446681	24000	nM	CN(CCc1ccc(-c2ccccc2)cc1)Cc1cn(C)c2ccc(C(=O)Nc3ccc(F)cc3)cc12	4.61979
CHEMBL488646	25000	nM	COc1cc(C2=C(c3cn(COC(C)(C)C)c4ccccc34)CNC2=O)cc(OC)c1OC	4.60206
CHEMBL1828884	25030	nM	COc1ccc(CC(=O)NS(=O)(=O)c2ccc(Br)cc2)cc1	4.60154
CHEMBL4162362	25400	nM	COCCc1ccc(OCc2ccc(-c3cc(C(F)(F)F)cc(S(=O)(=O)NCCc4cccc(F)c4)c3)cc2)cc1	4.59517
CHEMBL91748	25710	nM	CN(C)/C=C/C(=O)Nc1ccc2ncnc(Nc3cccc(Br)c3)c2c1	4.5899
CHEMBL589847	25870	nM	O=C(NCc1ccccc1)c1ccc(N(CCCl)CCCl)cc1	4.5872
CHEMBL1829271	26330	nM	O=C(Cc1cccc(Br)c1)NS(=O)(=O)c1ccccc1	4.57955
CHEMBL589832	27190	nM	O=C(Nc1ccc([N+](=O)[O-])cc1)c1ccc(N(CCCl)CCCl)cc1	4.56559
CHEMBL1829275	27380	nM	O=C(Cc1cccc(Br)c1)NS(=O)(=O)c1ccc(Br)cc1	4.56257
CHEMBL91	27430	nM	Clc1ccc(COC(Cn2ccnc2)c2ccc(Cl)cc2Cl)c(Cl)c1	4.56177
CHEMBL591051	27830	nM	O=C1CSC(N/N=C/c2cccc(O)c2)=N1	4.55549
CHEMBL1829272	27890	nM	Cc1ccc(S(=O)(=O)NC(=O)Cc2cccc(Br)c2)cc1	4.55455
CHEMBL3133827	28300	nM	O=S(=O)(c1ccc2[nH]c3nccc(Nc4cccc(OCc5ccccc5)c4)c3c2c1)N1CCOCC1	4.54821
CHEMBL430845	29000	nM	COC1=CC(=O)C=CC1=O	4.5376
CHEMBL1828880	29070	nM	COc1ccc(CC(=O)NS(=O)(=O)c2ccccc2)cc1	4.53655
CHEMBL590083	30060	nM	CCCCNC(=O)c1ccc(N(CCCl)CCCl)cc1	4.52201
CHEMBL295316	30800	nM	CC1=CC(=O)c2c(O)cccc2C1=O	4.51145
CHEMBL209511	31000	nM	O=S(=O)(Nc1ccc(Cl)cc1O)c1ccccc1	4.50864
CHEMBL592240	31000	nM	O=C1CSC(NN=C2CCCCCCC2)=N1	4.50864
CHEMBL113996	31430	nM	COc1cc2ncc(C#N)c(Nc3ccc(F)c(Cl)c3)c2cc1NC(=O)/C=C/CN1CCOCC1	4.50266
CHEMBL4161318	31500	nM	O=S(=O)(NCCc1cccc(F)c1)c1cc(-c2ccc(-c3cccs3)s2)cc(C(F)(F)F)c1	4.50169
CHEMBL238617	31600	nM	N#Cc1n[nH]nc1-c1ccc(F)cc1	4.50031
CHEMBL590568	31780	nM	Cc1cccc(/C=N/NC2=NC(=O)CS2)c1	4.49785
CHEMBL589413	32540	nM	CCCCN(Cc1cccc(Cl)c1O)C(=S)Nc1ccccc1	4.48758
CHEMBL246167	32730	nM	FC(F)(F)c1c[nH]c(-c2n[nH]cc2/C=C/c2cncc3ccccc23)n1	4.48505
CHEMBL116012	33950	nM	CCOc1cc2ncc(C#N)c(Nc3cccc(Br)c3)c2cc1NC(=O)/C=C/CN1CCOCC1	4.46916
CHEMBL114073	33950	nM	COc1cc2ncc(C#N)c(Nc3ccc(F)c(Cl)c3)c2cc1NC(=O)/C=C/C(C)N1CCOCC1	4.46916
CHEMBL55360	34000	nM	Cc1cccc(C)c1NC(=O)/C(C#N)=C/c1ccc(O)c(O)c1	4.46852
CHEMBL332497	34130	nM	COc1cc2ncc(C#N)c(Nc3cccc(Br)c3)c2cc1NC(=O)/C=C/CN1CCOCC1	4.46686
CHEMBL5172914	34720	nM	Cc1ccc(-c2ccc3c(ccn3Cc3coc(/C=C/c4ccc(C(F)(F)F)cc4)n3)c2)cc1	4.45942
CHEMBL53898	35000	nM	N#C/C(=C\c1ccc(O)c(O)c1)C(=O)NCCCc1ccccc1	4.45593
CHEMBL55994	35000	nM	N#C/C(=C\c1ccc(O)c(O)c1)C(=O)c1cccs1	4.45593
CHEMBL4569508	35000	nM	O=C(NCC(F)(F)F)c1cc(-c2cnn3cc(-c4ccc(OCCN5CCCCC5)cc4)cnc23)cs1	4.45593
CHEMBL1683952	36000	nM	Fc1cccc(COc2ccc(Nc3cc(-c4ccsc4)ncn3)cc2Cl)c1	4.4437
CHEMBL453336	36000	nM	COc1cc(C2=C(c3cn(COCc4ccccc4)c4ccccc34)CNC2=O)cc(OC)c1OC	4.4437
CHEMBL1172878	36450	nM	Cc1ncc([N+](=O)[O-])n1CCOC(=O)/C=C/c1ccccc1Cl	4.4383
CHEMBL240093	36500	nM	Cc1ccc(-c2n[nH]nc2C#N)cc1	4.43771
CHEMBL4095623	36900	nM	c1ccc(Cc2nnc(Cc3nc4ccccc4[nH]3)o2)cc1	4.43297
CHEMBL245966	37000	nM	CCNC(=O)c1cncc(/C=C/c2c[nH]nc2-c2nc3ccc(OC)cc3[nH]2)c1	4.4318
CHEMBL55979	37000	nM	CC(NC(=O)/C(C#N)=C/c1ccc(O)c(O)c1)c1ccccc1	4.4318
CHEMBL488811	37000	nM	COc1cc(C2=C(c3cn(COc4ccccc4)c4ccccc34)CNC2=O)cc(OC)c1OC	4.4318
CHEMBL4286733	37100	nM	O=C(Nc1ccc(-c2cc3c(Nc4ccc(Oc5cccc(C(F)(F)F)c5)c(Cl)c4)ncnc3s2)cc1)NC1CC1	4.43063
CHEMBL591050	37640	nM	O=C1CSC(N/N=C/c2cccc([N+](=O)[O-])c2)=N1	4.42435
CHEMBL592224	37820	nM	Cc1cc(C)c(O)c(CN(Cc2ccc(F)cc2)C(=S)Nc2ccccc2)c1	4.42228
CHEMBL4575427	37930	nM	N=C1N=C(NCCS(=O)(=O)O)/C(=C/C(O)CNC(=O)c2cc(Br)c[nH]2)N1	4.42102
CHEMBL1095259	37930	nM	N=C1N=C(NCCS(=O)(=O)O)/C(=C/C(O)CNC(=O)c2cc(Br)c(Br)[nH]2)N1	4.42102
CHEMBL1828883	37930	nM	COc1ccc(CC(=O)NS(=O)(=O)c2ccc(Cl)cc2)cc1	4.42102
CHEMBL600048	38230	nM	Cc1cccc(CN(Cc2ccc(F)cc2)C(=O)Nc2ccccc2)c1O	4.4176
CHEMBL606027	39510	nM	CCCCN(Cc1cccc(Br)c1O)C(=S)Nc1ccccc1	4.40329
CHEMBL602645	39640	nM	CCCN(CCC)C(=O)c1ccc(N(CCCl)CCCl)cc1	4.40187
CHEMBL591440	39780	nM	CCCCN(Cc1cc(Cl)cc(Cl)c1O)C(=S)Nc1ccccc1	4.40034
CHEMBL4068254	40000	nM	c1ccc(-c2nnc(Cc3nc4ccccc4[nH]3)o2)cc1	4.39794
CHEMBL1173789	40000	nM	Cc1ncc([N+](=O)[O-])n1CCOC(=O)/C=C/c1ccccc1[N+](=O)[O-]	4.39794
CHEMBL113690	40000	nM	CCCCn1c(Cc2cc(OC)c(OC)c(OC)c2)nc2c(N)ncnc21	4.39794
CHEMBL1172877	41260	nM	Cc1ncc([N+](=O)[O-])n1CCOC(=O)/C=C/c1ccccc1F	4.38447
CHEMBL31184	41503	nM	c1ccc2c(c1)cc1ccc3cccc4ccc2c1c34	4.38192
CHEMBL56731	42000	nM	N#C/C(=C\c1ccc(O)c(O)c1)C(=O)Nc1ccccc1	4.37675
CHEMBL589119	44510	nM	CCCCN(CCCC)C(=O)c1ccc(N(CCCl)CCCl)cc1	4.35154
CHEMBL1172947	44850	nM	Cc1ncc([N+](=O)[O-])n1CCOC(=O)/C=C/c1ccccc1Br	4.34824
CHEMBL14326	45000	nM	Nc1ncnc2c1ncn2[C@@H]1O[C@H](CO)[C@@H](O)[C@H]1S	4.34679
CHEMBL592141	45510	nM	COc1cccc(/C=N/NC2=NC(=O)CS2)c1	4.34189
CHEMBL4083493	45700	nM	Clc1ccc2nc(Cc3nnc(-c4ccccc4Cl)o3)[nH]c2c1	4.34008
CHEMBL589259	46100	nM	CC(C)(C)NC(=O)c1ccc(N(CCCl)CCCl)cc1	4.3363
CHEMBL4074782	46800	nM	Cc1ccccc1-c1nnc(Cc2nc3ccccc3[nH]2)o1	4.32975
CHEMBL589165	47000	nM	O=C1CSC(NN=C2CCCCCC2)=N1	4.3279
CHEMBL589503	48350	nM	O=C(NC1CCCC1)c1ccc(N(CCCl)CCCl)cc1	4.3156
CHEMBL291986	49000	nM	N#C/C(=C\c1ccc(O)c(O)c1)C(=O)N1CCN(c2ccccc2)CC1	4.3098
CHEMBL55993	50000	nM	Cc1cc(C)c(C(=O)/C(C#N)=C/c2ccc(O)c(O)c2)c(C)c1	4.30103
CHEMBL201511	50000	nM	COc1cc(C2=C(c3c[nH]c4ccccc34)C(=O)NC2=O)cc(OC)c1OC	4.30103
CHEMBL4087921	52400	nM	c1ccc(OCc2nnc(Cc3nc4ccccc4[nH]3)o2)cc1	4.28067
CHEMBL4102942	52600	nM	Clc1ccc(-c2nnc(Cc3nc4ccc(Cl)cc4[nH]3)o2)c(Cl)c1	4.27901
CHEMBL269528	53500	nM	N#Cc1n[nH]nc1-c1ccccc1	4.27165
CHEMBL3133826	54800	nM	CCOc1cccc(Nc2ccnc3[nH]c4ccc(S(=O)(=O)N5CCOCC5)cc4c23)c1	4.26122
CHEMBL56219	57000	nM	N#C/C(=C\c1ccc(O)c(O)c1)C(=O)Nc1ccccc1Cl	4.24413
CHEMBL4102214	57600	nM	c1ccc(C(c2ccccc2)c2nnc(Cc3nc4ccccc4[nH]3)o2)cc1	4.23958
CHEMBL208433	61000	nM	CC1(C)CC2=Nc3ccccc3NC(c3cccc(O)c3O)C2=C(O)C1	4.21467
CHEMBL89505	64800	nM	CC(C)(C)c1cc(/C=C2\C(=O)Nc3ccccc32)cc(C(C)(C)C)c1O	4.18842
CHEMBL1683957	65000	nM	Cc1c(Nc2ccc(OCc3cccc(F)c3)c(Cl)c2)ncnc1-c1ccccc1	4.18709
CHEMBL104	66405	nM	Clc1ccccc1C(c1ccccc1)(c1ccccc1)n1ccnc1	4.1778
CHEMBL90277	66600	nM	Cc1cccc2c1/C(=C/c1ccc(N3CCOCC3)cc1)C(=O)N2	4.17653
CHEMBL315546	90200	nM	O=CN1CCN(c2ccc(/C=C3\C(=O)Nc4ccccc43)cc2)CC1	4.04479
CHEMBL3133834	91200	nM	COc1cccc(Nc2ccnc3[nH]c4ccc(Br)cc4c23)c1	4.04001
CHEMBL93464	91325	nM	C/C=C/C(=O)Nc1ccc2ncnc(Nc3cccc(Br)c3)c2c1	4.03941
CHEMBL86432	91400	nM	CSc1ccc(/C=C2\C(=O)Nc3cccc(C)c32)s1	4.03905
CHEMBL315701	92600	nM	O=C1Nc2ccccc2/C1=C/c1ccc(N2CCCCC2)cc1	4.03339
CHEMBL521155	95000	nM	Nc1ncnc2c1ncn2CC(=O)c1c[nH]c2ccccc12	4.02228
CHEMBL364272	120000	nM	Nc1ncnc2[nH]c(Sc3cc(Cl)ccc3Cl)nc12	3.92082
CHEMBL190654	310000	nM	CCCCn1c(S(=O)(=O)c2cc(OC)c(OC)c(OC)c2)nc2c(N)ncnc21	3.50864
