# Supplementary material for: AI-Driven Drug Discovery for Breast Cancer Based on ERBB2 Identified Through Network Pharmacology and GEO Data Analysis
Source: Research Square preprint supplement (doi:10.21203/rs.3.rs-6047847/v1), 2025-02-26
Supplement: Supplementary file 13 [file f08c8ca4d9f8d4f1ab2fc67a.xlsx]

## Sheet: 602compounds
S11. Compounds after excluting unfavorable substructures
molecule_chembl_id	smiles	pIC50	active	fp
CHEMBL941	Cc1ccc(NC(=O)c2ccc(CN3CCN(C)CC3)cc2)cc1Nc1nccc(-c2cccnc2)n1	10.2218	1	[0 0 0 ... 0 0 0]
CHEMBL5221067	N#Cc1c(NC(=O)CNc2n[nH]c3ncccc23)sc2c1CCCC2	9.85387	1	[0 0 0 ... 0 0 0]
CHEMBL258282	CN1CCN(CCOc2n[nH]c3ncnc(Nc4ccc(OCc5ccccn5)c(Cl)c4)c23)CC1	9	1	[0 0 0 ... 0 0 0]
CHEMBL4067871	OC[C@H](Nc1cnc(-c2cc(Cl)ccc2O)c(-c2ccc3cnccc3c2)c1)c1ccccc1	9	1	[0 1 0 ... 0 0 0]
CHEMBL4105329	Cc1n[nH]c2ccc(-c3cc(N[C@@H](CO)c4ccccc4)cnc3-c3cc(Cl)ccc3O)cc12	9	1	[0 1 0 ... 0 0 0]
CHEMBL4075917	Cc1n[nH]c2ccc(-c3cc(N[C@@H](CO)c4ccccc4)cnc3-c3ccc(F)cc3O)cc12	9	1	[0 1 0 ... 0 0 0]
CHEMBL483332	C[C@H](CN(C)C)Oc1cccc2ncnc(Nc3ccc(OCc4cnccn4)c(Cl)c3)c12	9	1	[1 1 0 ... 0 0 0]
CHEMBL2048789	O=C1NCc2ccc(Oc3ccc(Nc4ncnc5ccn(CCO)c45)cc3Cl)cc21	8.88606	1	[0 0 0 ... 0 0 0]
CHEMBL2048795	O=C1Cc2cccc(Oc3ccc(Nc4ncnc5ccn(CCO)c45)cc3Cl)c2N1	8.82391	1	[0 0 0 ... 0 0 0]
CHEMBL2048906	CC(=O)NCCn1ccc2ncnc(Nc3ccc(Oc4cccc5sncc45)c(Cl)c3)c21	8.79588	1	[0 0 0 ... 0 0 0]
CHEMBL2048796	O=C1Cc2c(cccc2Oc2ccc(Nc3ncnc4ccn(CCO)c34)cc2Cl)N1	8.79588	1	[0 0 0 ... 0 0 0]
CHEMBL2048903	OCCn1ccc2ncnc(Nc3ccc(Oc4cccc5[nH]ncc45)c(Cl)c3)c21	8.76955	1	[0 0 0 ... 0 0 0]
CHEMBL2103842	C[C@@H]1COC(Nc2ccc3ncnc(Nc4ccc(OCc5nccs5)c(Cl)c4)c3c2)=N1	8.69897	1	[0 0 0 ... 0 0 0]
CHEMBL402553	Clc1cc(Nc2ncnc3[nH]nc(OCCN4CCCC4)c23)ccc1OCc1ccccn1	8.69897	1	[0 0 0 ... 0 0 0]
CHEMBL403569	O=C(CO)N1CCC[C@H]1COc1cccc2ncnc(Nc3ccc(OCc4ccccn4)c(Cl)c3)c12	8.69897	1	[0 0 0 ... 0 0 0]
CHEMBL518750	CC(C)(Oc1cccc2ncnc(Nc3ccc(OCc4ccccn4)c(Cl)c3)c12)C(N)=O	8.69897	1	[0 0 0 ... 0 0 0]
CHEMBL2048905	OCCn1ccc2ncnc(Nc3ccc(Oc4cccc5sncc45)c(Cl)c3)c21	8.67778	1	[0 0 0 ... 0 0 0]
CHEMBL2048904	Cn1ncc2c(Oc3ccc(Nc4ncnc5ccn(CCO)c45)cc3Cl)cccc21	8.67778	1	[0 0 0 ... 0 0 0]
CHEMBL2048788	CC(C)(C)NC(=O)c1cccc(Oc2ccc(Nc3ncnc4ccn(CCO)c34)cc2Cl)c1	8.63827	1	[0 0 0 ... 0 0 0]
CHEMBL2048794	O=C1NCc2cccc(Oc3ccc(Nc4ncnc5ccn(CCO)c45)cc3Cl)c21	8.60206	1	[0 0 0 ... 0 0 0]
CHEMBL2048797	OCCn1ccc2ncnc(Nc3ccc(Oc4cccc5[nH]ccc45)c(Cl)c3)c21	8.60206	1	[0 0 0 ... 0 0 0]
CHEMBL5203179	COCC(=O)NC/C=C/c1ccc2ncnc(Nc3ccc(Oc4cc5nncn5cn4)c(C)c3)c2c1	8.59346	1	[0 0 0 ... 0 0 0]
CHEMBL2148050	CS(=O)(=O)CC(=O)NCCn1ccc2ncnc(Nc3ccc(Oc4cccc(Cl)c4)c(Cl)c3)c21	8.5376	1	[0 0 0 ... 0 0 0]
CHEMBL2408045	CNC(=O)CN1CCC(Oc2cc3c(Nc4cccc(Cl)c4F)ncnc3cc2OC)CC1	8.52288	1	[0 0 0 ... 0 0 0]
CHEMBL257430	Clc1cc(Nc2ncnc3[nH]nc(OCCN4CCNCC4)c23)ccc1OCc1ccccn1	8.52288	1	[0 0 0 ... 0 0 0]
CHEMBL402339	COc1cc(Nc2ncnc3[nH]nc(OCCN4CCC(O)CC4)c23)ccc1OCc1cccc(F)c1	8.52288	1	[0 0 0 ... 0 0 0]
CHEMBL1923003	Cn1ccc2ncnc(Nc3ccc(Oc4cccc(Cl)c4)c(Cl)c3)c21	8.48149	1	[0 0 0 ... 0 0 0]
CHEMBL1645473	NC1CCN(Cc2ccn3ncnc(Nc4cccc(Cl)c4)c23)CC1	8.39794	1	[0 0 0 ... 0 0 0]
CHEMBL411897	COC1CCN(CCOc2n[nH]c3ncnc(Nc4ccc(OCc5ccccn5)c(Cl)c4)c23)CC1	8.39794	1	[0 0 0 ... 0 0 0]
CHEMBL257861	OCCOc1n[nH]c2ncnc(Nc3ccc(OCc4ccccn4)c(Cl)c3)c12	8.39794	1	[0 0 0 ... 0 0 0]
CHEMBL479171	OCc1ccc(-c2cc3c(Nc4ccc(OCc5ccccc5)cc4)ncnc3cn2)o1	8.39794	1	[0 0 0 ... 0 0 0]
CHEMBL249928	CN(CCOc1cccc2ncnc(Nc3ccc(OCc4ccccn4)c(Cl)c3)c12)C(=O)CO	8.39794	1	[0 0 0 ... 0 0 0]
CHEMBL1080506	Cc1c(C(=O)NCCN2CCOCC2)[nH]c2cnnc(Nc3ccc(OCc4cccc(F)c4)c(Cl)c3)c12	8.39794	1	[0 0 0 ... 0 0 0]
CHEMBL1645474	NC1CCN(Cc2ccn3ncnc(Nc4cccc(Br)c4)c23)CC1	8.39794	1	[0 0 0 ... 0 0 0]
CHEMBL2148051	CC(C(=O)NCCn1ccc2ncnc(Nc3ccc(Oc4cccc(Cl)c4)c(Cl)c3)c21)S(C)(=O)=O	8.38722	1	[0 1 0 ... 0 0 0]
CHEMBL1923006	OCCn1ccc2ncnc(Nc3ccc(Oc4cccc(Cl)c4)c(Cl)c3)c21	8.38722	1	[0 0 0 ... 0 0 0]
CHEMBL288812	Cn1nc(C(C)(C)C)cc1NC(=O)Nc1ccc(Cc2ccncc2)cc1	8.37675	1	[0 0 0 ... 0 0 0]
CHEMBL1923019	O=C(CO)NCCn1ccc2ncnc(Nc3ccc(Oc4cccc(C(F)(F)F)c4)c(Cl)c3)c21	8.36653	1	[0 0 0 ... 0 0 0]
CHEMBL1922999	Cc1cccc(Oc2ccc(Nc3ncnc4cc[nH]c34)cc2Cl)c1	8.33724	1	[0 0 0 ... 0 0 0]
CHEMBL1645470	Cc1cccc(Nc2ncnn3ccc(CN4CCC(N)CC4)c23)c1	8.30103	1	[0 0 0 ... 0 0 0]
CHEMBL257873	Cc1ccc(Oc2ccc(Nc3ncnc4[nH]nc(OCCN5CCC(O)CC5)c34)cc2F)cn1	8.30103	1	[0 0 0 ... 0 0 0]
CHEMBL403435	Cc1cc(Nc2ncnc3[nH]nc(OCCN4CCC(O)CC4)c23)ccc1OCc1ccccn1	8.30103	1	[0 0 0 ... 0 0 0]
CHEMBL404405	OC1CCN(CCOc2n[nH]c3ncnc(Nc4ccc(OCc5ccccn5)c(Cl)c4)c23)CC1	8.30103	1	[0 0 0 ... 0 0 0]
CHEMBL2048798	OCCn1ccc2ncnc(Nc3ccc(Oc4cccc5sccc45)c(Cl)c3)c21	8.22185	1	[0 0 0 ... 0 0 0]
CHEMBL256784	C[C@H](Oc1cccc2ncnc(Nc3ccc4c(cnn4Cc4cccc(F)c4)c3)c12)C(=O)N(C)C	8.22185	1	[0 1 0 ... 0 1 0]
CHEMBL1645472	NC1CCN(Cc2ccn3ncnc(Nc4cccc(F)c4)c23)CC1	8.22185	1	[0 0 0 ... 0 0 0]
CHEMBL1645471	Cc1ccc(Nc2ncnn3ccc(CN4CCC(N)CC4)c23)cc1	8.22185	1	[0 0 0 ... 0 0 0]
CHEMBL1645476	NC1CCN(Cc2ccn3ncnc(Nc4ccc(F)c(Cl)c4)c23)CC1	8.22185	1	[0 0 0 ... 0 0 0]
CHEMBL587723	CCN1CCN(Cc2ccc(-c3cc4c(N[C@H](C)c5ccccc5)ncnc4[nH]3)cc2)CC1	8.22185	1	[0 1 0 ... 0 0 0]
CHEMBL4796265	CN1CCN(CC(=O)Nc2ccc3ncnc(Nc4ccc(OCc5cccc(F)c5)c(Cl)c4)c3c2)CC1	8.21467	1	[0 0 0 ... 0 0 0]
CHEMBL1093234	O=C(Nc1cccc(-c2nc3sccn3c2-c2ccnc(Nc3ccccc3)n2)c1)c1ccccc1	8.20066	1	[0 0 0 ... 0 0 0]
CHEMBL2148044	CS(=O)(=O)CC(=O)NCCn1ccc2ncnc(Nc3ccc(Oc4cccc(C(F)(F)F)c4)c(Cl)c3)c21	8.20066	1	[0 0 0 ... 0 0 0]
CHEMBL3989868	Cc1cc(Nc2ncnc3ccc(NC4=NC(C)(C)CO4)cc23)ccc1Oc1ccn2ncnc2c1	8.16115	1	[0 0 0 ... 0 0 0]
CHEMBL256783	C[C@@H](Oc1cccc2ncnc(Nc3ccc4c(cnn4Cc4cccc(F)c4)c3)c12)C(=O)N(C)C	8.09691	1	[0 1 0 ... 0 1 0]
CHEMBL1922901	N#Cc1ccccc1Oc1ccc(Nc2ncnc3cc[nH]c23)cc1Cl	8.09691	1	[0 0 0 ... 0 0 0]
CHEMBL1922902	N#Cc1cccc(Oc2ccc(Nc3ncnc4cc[nH]c34)cc2Cl)c1	8.08619	1	[0 0 0 ... 0 0 0]
CHEMBL1921812	Clc1cccc(Oc2ccc(Nc3ncnc4cc[nH]c34)cc2Cl)c1	8.08092	1	[0 0 0 ... 0 0 0]
CHEMBL1645467	NC1CCN(Cc2ccn3ncnc(Nc4ccccc4)c23)CC1	8.04576	1	[0 0 0 ... 0 0 0]
CHEMBL1922898	Fc1ccccc1Oc1ccc(Nc2ncnc3cc[nH]c23)cc1Cl	8.03152	1	[0 0 0 ... 0 0 0]
CHEMBL1923004	Cn1ccc2ncnc(Nc3ccc(Oc4cccc(C(F)(F)F)c4)c(Cl)c3)c21	7.95861	1	[0 0 0 ... 0 0 0]
CHEMBL257872	Cc1ccc(Oc2ccc(Nc3ncnc4[nH]nc(OCCN5CCC(O)CC5)c34)cc2C)cn1	7.95861	1	[0 0 0 ... 0 0 0]
CHEMBL1922900	Clc1ccccc1Oc1ccc(Nc2ncnc3cc[nH]c23)cc1Cl	7.95861	1	[0 1 0 ... 0 0 0]
CHEMBL483321	COCC(=O)NC/C=C/c1ccc2ncnc(Nc3ccc(Oc4ccc(C)nc4)c(C)c3)c2c1	7.92082	1	[0 0 0 ... 0 0 0]
CHEMBL1923007	OCCn1ccc2ncnc(Nc3ccc(Oc4cccc(C(F)(F)F)c4)c(Cl)c3)c21	7.92082	1	[0 0 0 ... 0 0 0]
CHEMBL404181	C[C@H](Oc1cccc2ncnc(Nc3ccc4c(cnn4Cc4nccs4)c3)c12)C(=O)N1CCOCC1	7.92082	1	[0 1 0 ... 0 1 0]
CHEMBL1923000	Fc1cccc(COc2ccc(Nc3ncnc4cc[nH]c34)cc2Cl)c1	7.88606	1	[0 0 0 ... 0 0 0]
CHEMBL248114	Cc1cncc(Cn2ncc3cc(Nc4ncnn5ccc(CN6CCC(N)CC6)c45)ccc32)c1	7.88606	1	[0 0 0 ... 0 1 0]
CHEMBL3133816	CC(=O)c1ccc2[nH]c3nccc(Nc4cccc(O)c4)c3c2c1	7.88606	1	[1 0 0 ... 0 0 0]
CHEMBL488350	COC(=O)CNCc1ccc(-c2cc3c(Nc4ccc(OCc5ccccc5)cc4)ncnc3cn2)o1	7.88606	1	[0 0 0 ... 0 0 0]
CHEMBL514938	Fc1cccc(COc2ccc(Nc3ncnc4sc(-c5ccco5)cc34)cc2Cl)c1	7.85387	1	[0 0 0 ... 0 0 0]
CHEMBL1922897	Clc1cc(Nc2ncnc3cc[nH]c23)ccc1Oc1ccccc1	7.79588	1	[0 0 0 ... 0 0 0]
CHEMBL233325	O[C@H]1CNCCN(Cc2ccn3ncnc(Nc4ccc5c(cnn5Cc5cccc(F)c5)c4)c23)C1	7.79588	1	[1 0 0 ... 0 1 0]
CHEMBL30432	CN(C)c1cc2c(Nc3ccc4c(cnn4Cc4ccccc4)c3)ncnc2cn1	7.79588	1	[0 0 0 ... 0 1 0]
CHEMBL3633929	CC(=O)Nc1ccc2ncnc(Nc3ccc(OCc4ccccn4)c(Cl)c3)c2c1	7.79588	1	[0 0 0 ... 0 0 0]
CHEMBL401713	COc1cc(Nc2ncnc3[nH]nc(OCCN4CCC(O)CC4)c23)ccc1OCc1ccccn1	7.76955	1	[0 0 0 ... 0 0 0]
CHEMBL448628	COc1ccccc1Cc1nc2ccc(-c3nn([C@H]4CC[C@H](N5CCN(C(=O)N(C)C)CC5)CC4)c4ncnc(N)c34)cc2[nH]1	7.76955	1	[0 0 0 ... 0 0 0]
CHEMBL1923005	Cn1ccc2ncnc(Nc3ccc(Oc4cccc(OC(F)(F)F)c4)c(Cl)c3)c21	7.76955	1	[0 0 0 ... 0 0 0]
CHEMBL228276	Cc1cc(Nc2ncnc3cnc(N4CCOCC4)cc23)ccc1OC1CCN(C(=O)C2CCCC2)CC1	7.74473	1	[0 0 0 ... 0 0 0]
CHEMBL2048790	O=C1NCc2cc(Oc3ccc(Nc4ncnc5ccn(CCO)c45)cc3Cl)ccc21	7.74473	1	[0 0 0 ... 0 0 0]
CHEMBL394057	O=C(O)COCc1ccn2ncnc(Nc3ccc4c(cnn4Cc4cccc(F)c4)c3)c12	7.74473	1	[0 0 0 ... 0 1 0]
CHEMBL2348416	COC(=O)C1=Cc2c(ncnc2Nc2ccc(Oc3cccc4sccc34)c(Cl)c2)NCC1	7.74473	1	[0 0 0 ... 0 0 0]
CHEMBL565714	CCC1=C2C(Nc3ccc4c(cnn4Cc4ccccc4)c3)=NC=NC2N=C1NC(=O)OCCN1CCNCC1	7.74473	1	[0 0 0 ... 0 1 1]
CHEMBL565467	CCC1=C2C(Nc3ccc4c(cnn4Cc4ccccc4)c3)=NC=NC2N=C1NC(=O)O[C@H]1CC[C@H](N)CC1	7.74473	1	[0 0 0 ... 0 1 1]
CHEMBL255376	OC1CCN(CCOc2n[nH]c3ncnc(Nc4ccc(OCc5cccc(F)c5)c(Cl)c4)c23)CC1	7.72125	1	[0 0 0 ... 0 0 0]
CHEMBL403774	C[C@@H](Oc1cccc2ncnc(Nc3ccc(OCc4ccccn4)c(Cl)c3)c12)C(=O)N1CCOCC1	7.72125	1	[0 1 0 ... 0 0 0]
CHEMBL477078	O=C(O)CNCc1ccc(-c2cc3c(Nc4ccc(OCc5ccccc5)cc4)ncnc3cn2)o1	7.72125	1	[0 0 0 ... 0 0 0]
CHEMBL403785	C[C@@H](COc1cccc2ncnc(Nc3ccc(OCc4ccccn4)c(Cl)c3)c12)N(C)C(=O)CO	7.72125	1	[0 1 0 ... 0 0 0]
CHEMBL567197	CCC1=C2C(Nc3ccc4c(cnn4Cc4ccccc4)c3)=NC=NC2N=C1NC(=O)O[C@H]1CC[C@@](C)(N)CC1	7.69897	1	[0 0 0 ... 0 1 1]
CHEMBL1922899	Fc1cccc(Oc2ccc(Nc3ncnc4cc[nH]c34)cc2Cl)c1	7.69897	1	[0 0 0 ... 0 0 0]
CHEMBL1645469	Cc1ccccc1Nc1ncnn2ccc(CN3CCC(N)CC3)c12	7.69897	1	[0 0 0 ... 0 0 0]
CHEMBL567873	CCC1=C2C(Nc3ccc4c(cnn4Cc4ccccc4)c3)=NC=NC2N=C1NC(=O)OC[C@@H]1COCCN1	7.67778	1	[0 0 0 ... 0 1 1]
CHEMBL439425	C[C@@H](Oc1cccc2ncnc(Nc3ccc4c(cnn4Cc4cccc(F)c4)c3)c12)C(=O)N1CCOCC1	7.65758	1	[0 1 0 ... 0 1 0]
CHEMBL248116	NC1CCN(Cc2ccn3ncnc(Nc4ccc(OCc5ccccn5)c(Cl)c4)c23)CC1	7.65758	1	[0 0 0 ... 0 0 0]
CHEMBL413987	C[C@@H](CN(C)C(=O)CO)Oc1cccc2ncnc(Nc3ccc(OCc4ccccn4)c(Cl)c3)c12	7.65758	1	[1 1 0 ... 0 0 0]
CHEMBL1923001	Clc1cc(Nc2ncnc3cc[nH]c23)ccc1OCc1ccccn1	7.65758	1	[0 0 0 ... 0 0 0]
CHEMBL402507	Cc1ccc(Oc2ccc(Nc3ncnc4cccc(O[C@H](C)C(=O)N5CCOCC5)c34)cc2C)cn1	7.65758	1	[0 1 0 ... 0 0 0]
CHEMBL583403	CCC1=C2C(Nc3ccc4c(cnn4Cc4cccc(F)c4)c3)=NC=NC2N=C1NC(=O)OC[C@@H]1COCCN1	7.65758	1	[0 0 0 ... 0 1 1]
CHEMBL1645462	Cc1c(NC(=O)OC[C@@H]2COCCN2)cn2ncnc(Nc3ccc4c(cnn4Cc4cccc(F)c4)c3)c12	7.65758	1	[0 0 0 ... 0 1 0]
CHEMBL411799	COc1cc(Nc2ncnc3cccc(O[C@H](C)C(=O)N4CCOCC4)c23)ccc1Oc1ccc(C)nc1	7.63827	1	[0 1 0 ... 0 0 0]
CHEMBL411192	Cc1cc(Nc2ncnc3cnc(N4CCOCC4)cc23)ccc1OC1CCN(C(=O)CC(C)(C)C)CC1	7.63827	1	[0 0 0 ... 0 0 0]
CHEMBL248108	NC1CCN(Cc2ccn3ncnc(Nc4ccc5c(cnn5Cc5cccc(F)c5)c4)c23)CC1	7.63827	1	[0 0 0 ... 0 1 0]
CHEMBL583218	CCC1=C2C(Nc3ccc4c(cnn4Cc4ccccc4)c3)=NC=NC2N=C1NC(=O)OCC1CCNCC1	7.63827	1	[0 0 0 ... 0 1 1]
CHEMBL256362	Cc1ccc(Oc2ccc(Nc3ncnc4cccc(O[C@H](C)C(=O)N(C)C)c34)cc2C)cn1	7.63827	1	[0 1 0 ... 0 0 0]
CHEMBL193578	Clc1cc(Nc2ncnc3cccc(OC4CCOCC4)c23)ccc1OCc1ccccn1	7.61979	1	[0 0 0 ... 0 0 0]
CHEMBL257198	C[C@H](Oc1cccc2ncnc(Nc3ccc4c(cnn4Cc4nccs4)c3)c12)C(=O)N(C)C	7.61979	1	[0 1 0 ... 0 1 0]
CHEMBL301018	COc1cc2ncnc(Nc3ccc(F)c(Cl)c3)c2cc1OC	7.61979	1	[0 0 0 ... 0 0 0]
CHEMBL194389	COc1cccc2ncnc(Nc3ccc(OCc4ccccn4)c(Cl)c3)c12	7.61979	1	[0 0 0 ... 0 0 0]
CHEMBL257197	C[C@@H](Oc1cccc2ncnc(Nc3ccc4c(cnn4Cc4nccs4)c3)c12)C(=O)N(C)C	7.58503	1	[0 1 0 ... 0 1 0]
CHEMBL248321	NC1CCN(Cc2ccn3ncnc(Nc4ccc(OCc5cnccn5)c(Cl)c4)c23)CC1	7.58503	1	[0 0 0 ... 0 0 0]
CHEMBL1921813	COc1cccc(Oc2ccc(Nc3ncnc4cc[nH]c34)cc2Cl)c1	7.58503	1	[0 0 0 ... 0 0 0]
CHEMBL392273	Fc1cccc(Cn2ncc3cc(Nc4ncnn5ccc(CN6CCCNCC6)c45)ccc32)c1	7.56864	1	[0 0 0 ... 0 1 0]
CHEMBL2048791	O=C1Cc2cc(Oc3ccc(Nc4ncnc5ccn(CCO)c45)cc3Cl)ccc2N1	7.55284	1	[0 0 0 ... 0 0 0]
CHEMBL566350	CCC1=C2C(Nc3ccc4c(cnn4Cc4ccccc4)c3)=NC=NC2N=C1NC(=O)OCCN1CCCCC1	7.55284	1	[0 0 1 ... 0 1 1]
CHEMBL3133833	Oc1cccc(Nc2ccnc3[nH]c4ccc(Br)cc4c23)c1	7.5376	1	[1 0 0 ... 0 0 0]
CHEMBL1923008	OCCn1ccc2ncnc(Nc3ccc(Oc4cccc(OC(F)(F)F)c4)c(Cl)c3)c21	7.5376	1	[0 0 0 ... 0 0 0]
CHEMBL584714	CCC1=C2C(Nc3ccc4c(cnn4Cc4ccccc4)c3)=NC=NC2N=C1NC(=O)OCC1CCCNC1	7.5376	1	[0 0 0 ... 0 1 1]
CHEMBL2348414	O=C(NCCO)C1=Cc2c(ncnc2Nc2ccc(Oc3cccc(C(F)(F)F)c3)c(Cl)c2)NCC1	7.5376	1	[0 0 0 ... 0 0 0]
CHEMBL566559	CCC1=C2C(Nc3ccc4c(cnn4Cc4ccccc4)c3)=NC=NC2N=C1NC(=O)OCC1CCCCN1	7.52288	1	[0 0 0 ... 0 1 1]
CHEMBL429760	Cc1ccc(Oc2ccc(Nc3ncnc4cccc(O[C@@H](C)C(=O)N(C)C)c34)cc2C)cn1	7.52288	1	[0 1 0 ... 0 0 0]
CHEMBL1922905	FC(F)(F)c1cccc(Oc2ccc(Nc3ncnc4cc[nH]c34)cc2Cl)c1	7.52288	1	[0 0 0 ... 0 0 0]
CHEMBL5189852	FC(F)(F)c1ccc(/C=C/c2nc(CNc3ccc(Br)cc3)co2)cc1	7.52288	1	[0 0 0 ... 0 0 0]
CHEMBL3409482	CN(CCO)c1cc2c(Nc3ccc4c(cnn4Cc4ccccc4)c3)ncnc2cn1	7.52288	1	[0 0 0 ... 0 1 0]
CHEMBL228925	CNc1cc2c(Nc3ccc(Oc4ccc(C(=O)NCC(C)(C)C)cc4)c(C)c3)ncnc2cn1	7.52288	1	[0 0 0 ... 0 0 0]
CHEMBL258313	C[C@@H](Oc1cccc2ncnc(Nc3ccc(OCc4ccccn4)c(Cl)c3)c12)C(=O)N(C)CCO	7.50864	1	[0 1 0 ... 0 0 0]
CHEMBL247104	OCCNC1CCN(Cc2ccn3ncnc(Nc4ccc5c(cnn5Cc5cccc(F)c5)c4)c23)CC1	7.50864	1	[0 0 0 ... 0 1 0]
CHEMBL247710	NC1CCN(Cc2ccn3ncnc(Nc4ccc(OCc5cccc(F)c5)c(Cl)c4)c23)CC1	7.49485	1	[0 0 0 ... 0 0 0]
CHEMBL256363	C[C@@H](Oc1cccc2ncnc(Nc3ccc4c(cnn4Cc4ccccn4)c3)c12)C(N)=O	7.49485	1	[0 1 0 ... 0 1 0]
CHEMBL3814846	CC(=O)Nc1ccc2ncnc(Nc3ccc(OCc4cccc(F)c4)c(Cl)c3)c2c1	7.4908	1	[0 0 0 ... 0 0 0]
CHEMBL1645475	NC1CCN(Cc2ccn3ncnc(Nc4cc(Cl)cc(Cl)c4)c23)CC1	7.46852	1	[0 0 0 ... 0 0 0]
CHEMBL428777	C[C@@H](Oc1cccc2ncnc(Nc3ccc(OCc4ccccn4)c(Cl)c3)c12)C(=O)N(C)C	7.46852	1	[0 1 0 ... 0 0 0]
CHEMBL247915	NC1CCN(Cc2ccn3ncnc(Nc4ccc5c(cnn5Cc5cccnc5)c4)c23)CC1	7.46852	1	[0 0 0 ... 0 1 0]
CHEMBL430407	Cc1ccc(Oc2ccc(Nc3ncnc4cccc(O[C@@H](C)C(=O)N5CCOCC5)c34)cc2C)cn1	7.45593	1	[0 1 0 ... 0 0 0]
CHEMBL247914	NC1CCN(Cc2ccn3ncnc(Nc4ccc5c(cnn5Cc5ccccn5)c4)c23)CC1	7.45593	1	[0 0 0 ... 0 1 0]
CHEMBL391387	NC1CCN(Cc2ccn3ncnc(Nc4ccc(OCc5cccnc5)c(Cl)c4)c23)CC1	7.4437	1	[0 0 0 ... 0 0 0]
CHEMBL578044	CCC1=C2C(Nc3ccc4c(cnn4Cc4ccccc4)c3)=NC=NC2N=C1NC(=O)OCCC1CCNCC1	7.4318	1	[0 0 0 ... 0 1 1]
CHEMBL391778	NCC1CCN(Cc2ccn3ncnc(Nc4ccc5c(cnn5Cc5cccc(F)c5)c4)c23)CC1	7.42022	1	[0 0 0 ... 0 1 0]
CHEMBL234580	O=C1CNCCN(Cc2ccn3ncnc(Nc4ccc5c(cnn5Cc5cccc(F)c5)c4)c23)C1	7.40894	1	[0 0 0 ... 0 1 0]
CHEMBL412367	CCc1c(NC(=O)OCCn2ccnc2)cn2ncnc(Nc3ccc4c(cnn4Cc4ccccc4)c3)c12	7.39794	1	[0 0 0 ... 0 1 0]
CHEMBL196438	CCc1c(C(=O)O)cn2ncnc(Nc3ccc4c(cnn4Cc4ccccc4)c3)c12	7.39794	1	[0 0 0 ... 0 1 0]
CHEMBL1922998	FC(F)(F)Oc1cccc(Oc2ccc(Nc3ncnc4cc[nH]c34)cc2Cl)c1	7.38722	1	[0 0 0 ... 0 0 0]
CHEMBL245278	C[C@H](c1cccc(F)c1)n1ncc2cc(Nc3ncnn4ccc(COC[C@@H]5CNCCO5)c34)ccc21	7.38722	1	[0 1 0 ... 0 0 0]
CHEMBL247709	Fc1cccc(COc2ccc(Nc3ncnn4ccc(CN5CCCNCC5)c34)cc2Cl)c1	7.38722	1	[0 0 0 ... 0 0 0]
CHEMBL257411	C[C@@H](Oc1cccc2ncnc(Nc3ccc4c(cnn4Cc4nccs4)c3)c12)C(=O)N1CCOCC1	7.36653	1	[0 1 0 ... 0 1 0]
CHEMBL393264	CC1(N)CCN(Cc2ccn3ncnc(Nc4ccc5c(cnn5Cc5cccc(F)c5)c4)c23)CC1	7.36653	1	[0 0 0 ... 0 1 0]
CHEMBL255968	C[C@H](Oc1cccc2ncnc(Nc3ccc(OCc4ccccn4)c(Cl)c3)c12)C(=O)N(C)C	7.36653	1	[0 1 0 ... 0 0 0]
CHEMBL391181	COc1cn2ncnc(Nc3ccc4c(cnn4Cc4cccc(F)c4)c3)c2c1CN1CCC(N)CC1	7.36653	1	[0 0 0 ... 0 1 0]
CHEMBL506414	Fc1cccc(COc2ccc(Nc3ncnc4sc(-c5cccs5)cc34)cc2Cl)c1	7.36653	1	[0 0 0 ... 0 0 0]
CHEMBL566337	CCC1=C2C(Nc3ccc4c(cnn4Cc4ccccc4)c3)=NC=NC2N=C1NC(=O)OCCn1ccnc1	7.35655	1	[0 0 0 ... 0 1 1]
CHEMBL455208	COc1ccccc1Cc1nc2ccc(-c3nn([C@H]4CC[C@H](N5CCNCC5)CC4)c4ncnc(N)c34)cc2[nH]1	7.35655	1	[0 0 0 ... 0 0 0]
CHEMBL228926	Cc1cc(Nc2ncnc3cnc(N(C)C)cc23)ccc1Oc1ccc(C(=O)NCC(C)(C)C)cc1	7.31876	1	[0 0 0 ... 0 0 0]
CHEMBL3896067	COc1cc2c(Nc3ccc(Br)c(Cl)c3)ncnc2cc1O[C@H]1CO[C@H]2[C@@H]1OC[C@@H]2S(C)(=O)=O	7.30103	1	[0 0 0 ... 0 0 0]
CHEMBL3910031	COc1cc2c(Nc3ccc(Br)c(Cl)c3)ncnc2cc1O[C@H]1CO[C@H]2[C@@H]1OC[C@@H]2OC	7.30103	1	[0 0 0 ... 0 0 0]
CHEMBL3907230	CCO[C@H]1CO[C@H]2[C@@H]1OC[C@@H]2Oc1cc2ncnc(Nc3ccc(Br)c(Cl)c3)c2cc1OC	7.30103	1	[0 0 0 ... 0 0 0]
CHEMBL3921689	COc1cc2c(Nc3ccc(Br)c(Cl)c3)ncnc2cc1O[C@H]1CO[C@H]2[C@@H]1OC[C@@H]2OC(F)F	7.30103	1	[0 1 0 ... 0 0 0]
CHEMBL3932115	COc1cc2c(Nc3ccc(Br)c(Cl)c3)ncnc2cc1O[C@H]1CO[C@@H]2CCO[C@H]12	7.30103	1	[0 0 0 ... 0 0 0]
CHEMBL3945353	COc1cc2c(Nc3ccc(Cl)c(Cl)c3)ncnc2cc1OCc1nc2c(s1)CNCC2	7.30103	1	[0 0 0 ... 0 0 0]
CHEMBL3928696	COc1cc2c(Nc3ccc(Cl)c(Cl)c3)ncnc2cc1OCC1CC1	7.30103	1	[0 0 0 ... 0 0 0]
CHEMBL3945028	COc1cc2c(Nc3ccc(Br)c(Cl)c3)ncnc2cc1O[C@@H]1CO[C@H]2[C@@H]1OC[C@@H]2O	7.30103	1	[0 0 0 ... 0 0 0]
CHEMBL3919145	COc1cc2c(Nc3ccc(Cl)c(Cl)c3)ncnc2cc1O[C@@H]1C[C@H]2OC[C@H](OC)[C@H]2O1	7.30103	1	[0 0 0 ... 0 0 0]
CHEMBL3949434	COc1cc2c(Nc3ccc(Cl)c(Cl)c3)ncnc2cc1OC[C@@H]1O[C@@H](OC)[C@@H](O)[C@H](O)[C@H]1O	7.30103	1	[0 0 0 ... 0 0 0]
CHEMBL3964605	COc1cc2c(Nc3ccc(Br)c(Cl)c3)ncnc2cc1O[C@@H]1C[C@H]2OCC3(OCCO3)[C@H]2O1	7.30103	1	[0 0 0 ... 0 0 0]
CHEMBL3964556	COc1cc2c(Nc3ccc(Cl)c(Cl)c3)ncnc2cc1O[C@H]1CO[C@H]2[C@@H]1OC[C@@H]2OC	7.30103	1	[0 0 0 ... 0 0 0]
CHEMBL3936151	CCN1CCOC(COc2cc3ncnc(Nc4ccc(Cl)c(Cl)c4)c3cc2OC)C1	7.30103	1	[0 0 0 ... 0 0 0]
CHEMBL3893363	COc1cc2c(Nc3ccc(Br)c(Cl)c3)ncnc2cc1O[C@H]1CO[C@H]2[C@@H]1OC[C@@H]2O	7.30103	1	[0 0 0 ... 0 0 0]
CHEMBL3983938	CCN1CCCOC(COc2cc3ncnc(Nc4ccc(Cl)c(Cl)c4)c3cc2OC)C1	7.30103	1	[0 0 0 ... 0 0 0]
CHEMBL3928883	COc1cc2c(Nc3ccc(Cl)c(Cl)c3)ncnc2cc1OC[C@@H]1CN2CCC[C@H]2CO1	7.30103	1	[0 0 0 ... 0 0 0]
CHEMBL3914599	CCCN1CCCOC(COc2cc3ncnc(Nc4ccc(Cl)c(Cl)c4)c3cc2OC)C1	7.30103	1	[0 0 0 ... 0 0 0]
CHEMBL3919051	CCCCN1CCOC(COc2cc3ncnc(Nc4ccc(Cl)c(Cl)c4)c3cc2OC)C1	7.30103	1	[0 0 0 ... 0 0 0]
CHEMBL3916225	COc1cc2c(Nc3ccc(C)c(Br)c3)ncnc2cc1OCC1CN(C)CCO1	7.30103	1	[0 0 0 ... 0 0 0]
CHEMBL3920036	COc1cc2c(Nc3ccc(Cl)c(Cl)c3)ncnc2cc1OC1C[C@@H]2CN(C)C[C@@H]2C1	7.30103	1	[0 0 0 ... 0 0 0]
CHEMBL3945177	COc1cc2c(Nc3ccc(Br)c(Cl)c3)ncnc2cc1OCC1CN(C)CCO1	7.30103	1	[0 0 0 ... 0 0 0]
CHEMBL3934095	COc1cc2c(Nc3ccc(Br)c(C)c3)ncnc2cc1OCC1CN(C)CCO1	7.30103	1	[0 0 0 ... 0 0 0]
CHEMBL3914189	COc1cc2c(Nc3ccc(Cl)c(Cl)c3)ncnc2cc1OCC1CNCC(C)(C)O1	7.30103	1	[0 0 0 ... 0 0 0]
CHEMBL3893416	COc1cc2c(Nc3ccc(Cl)c(Cl)c3)ncnc2cc1OC[C@@H]1CO[C@H]2[C@@H]1OC[C@@H]2OC	7.30103	1	[0 0 0 ... 0 0 0]
CHEMBL3943734	COc1cc2c(Nc3ccc(Br)c(Cl)c3)ncnc2cc1O[C@@H]1CO[C@H]2[C@@H]1OC[C@@H]2NS(C)(=O)=O	7.30103	1	[0 0 0 ... 0 0 0]
CHEMBL3928601	COc1cc2c(Nc3ccc(Cl)c(Cl)c3)ncnc2cc1OCC1CN(C)CC(C)(C)O1	7.30103	1	[0 0 0 ... 0 0 0]
CHEMBL3955359	COc1cc2c(Nc3cccc(Cl)c3F)ncnc2cc1O[C@H]1CO[C@H]2[C@@H]1OC[C@@H]2OC	7.30103	1	[0 0 0 ... 0 0 0]
CHEMBL3917220	COc1cc2c(Nc3ccc(Cl)c(Cl)c3)ncnc2cc1OC[C@H]1CN2CCC[C@@H]2CO1	7.30103	1	[0 0 0 ... 0 0 0]
CHEMBL3939133	COc1cc2c(Nc3ccc(Cl)c(Cl)c3)ncnc2cc1OCCC1CN(C)CC(C)(C)O1	7.30103	1	[0 0 0 ... 0 0 0]
CHEMBL3937048	COc1cc2c(Nc3cccc(Cl)c3F)ncnc2cc1O[C@H]1CO[C@H]2[C@@H]1OC[C@@H]2F	7.30103	1	[0 0 0 ... 0 0 0]
CHEMBL3939828	COc1cc2c(Nc3ccc(Br)c(Cl)c3)ncnc2cc1O[C@@H]1CCOC1	7.30103	1	[0 0 0 ... 0 0 0]
CHEMBL3924098	COc1cc2c(Nc3ccc(Br)c(Cl)c3C)ncnc2cc1OCC1CN(C)CCO1	7.30103	1	[0 0 0 ... 0 0 0]
CHEMBL3917294	COc1cc2c(Nc3ccc(Cl)c(Cl)c3)ncnc2cc1OCC1CN2CSC[C@H]2CO1	7.30103	1	[0 0 0 ... 0 0 0]
CHEMBL3893846	COc1cc2c(Nc3ccc(Cl)c(Cl)c3)ncnc2cc1OCC1CN(C)C(C)(C)C(=O)O1	7.30103	1	[0 0 0 ... 0 0 0]
CHEMBL3959495	COc1cc2c(Nc3ccc(Cl)c(Cl)c3)ncnc2cc1OCCC1CN(C)C(C)(C)CO1	7.30103	1	[0 0 0 ... 0 0 0]
CHEMBL3916828	COc1cc2c(N[C@H]3COC[C@@H]3OC)ncnc2cc1O[C@H]1CO[C@H]2[C@@H]1OC[C@@H]2O	7.30103	1	[0 0 0 ... 0 0 0]
CHEMBL3962203	COc1cc2c(Nc3ccc(Cl)c(Cl)c3)ncnc2cc1OCCC1CNC(C)(C)CO1	7.30103	1	[0 0 0 ... 0 0 0]
CHEMBL256576	C[C@@H](Oc1cccc2ncnc(Nc3ccc4c(cnn4Cc4ccccn4)c3)c12)C(=O)N1CCOCC1	7.29243	1	[0 1 0 ... 0 1 0]
CHEMBL231100	Cc1cc(Nc2ncnc3cnc(N(C)C)cc23)ccc1OC1CCN(C(=O)CC(C)(C)C)CC1	7.29243	1	[0 0 0 ... 0 0 0]
CHEMBL246687	N[C@H]1CCN(Cc2ccn3ncnc(Nc4ccc5c(cnn5Cc5cccc(F)c5)c4)c23)C1	7.284	1	[0 0 0 ... 0 1 0]
CHEMBL437584	COc1ccccc1Cc1nc2ccc(-c3nn([C@H]4CC[C@H](N5CCOCC5)CC4)c4ncnc(N)c34)cc2[nH]1	7.27572	1	[0 0 0 ... 0 0 0]
CHEMBL391779	CNC1CCN(Cc2ccn3ncnc(Nc4ccc5c(cnn5Cc5cccc(F)c5)c4)c23)CC1	7.26761	1	[0 0 0 ... 0 1 0]
CHEMBL246284	Fc1cccc(Cn2ncc3cc(Nc4ncnn5ccc(COC[C@@H]6CNCCO6)c45)ccc32)c1	7.25964	1	[0 0 0 ... 0 1 0]
CHEMBL1922906	FC(F)(F)Oc1ccccc1Oc1ccc(Nc2ncnc3cc[nH]c23)cc1Cl	7.25964	1	[0 0 0 ... 0 0 0]
CHEMBL371888	COc1cc2ncnc(Nc3ccc(OCc4ccccn4)c(C)c3)c2cc1OC	7.25181	1	[0 0 0 ... 0 0 0]
CHEMBL256994	CNC(=O)[C@@H](C)Oc1cccc2ncnc(Nc3ccc4c(cnn4Cc4cccc(F)c4)c3)c12	7.24413	1	[0 1 0 ... 0 1 0]
CHEMBL452717	COc1ccccc1Cc1nc2ccc(-c3nn([C@H]4CC[C@H](N5CCN(C(C)=O)CC5)CC4)c4ncnc(N)c34)cc2[nH]1	7.22915	1	[0 0 0 ... 0 0 0]
CHEMBL256364	CNC(=O)[C@@H](C)Oc1cccc2ncnc(Nc3ccc4c(cnn4Cc4ccccn4)c3)c12	7.22915	1	[0 1 0 ... 0 1 0]
CHEMBL1923002	Cc1ccc(Oc2ccc(Nc3ncnc4cc[nH]c34)cc2C)cn1	7.22185	1	[0 0 0 ... 0 0 0]
CHEMBL428046	Fc1cccc(Cn2ncc3cc(Nc4ncnn5ccc(COC[C@H]6CNCCO6)c45)ccc32)c1	7.22185	1	[0 0 0 ... 0 1 0]
CHEMBL248115	Cc1cncc(COc2ccc(Nc3ncnn4ccc(CN5CCC(N)CC5)c34)cc2Cl)c1	7.22185	1	[0 0 0 ... 0 0 0]
CHEMBL401443	OC1CCN(Cc2ccn3ncnc(Nc4ccc5c(cnn5Cc5cccc(F)c5)c4)c23)CC1	7.20066	1	[0 0 0 ... 0 1 0]
CHEMBL4437803	O=C(Nc1cccc(NC(=O)c2ccccn2)c1)NC1CCCCC1	7.19382	0	[0 0 1 ... 0 0 0]
CHEMBL403594	CNC(=O)[C@@H](C)Oc1cccc2ncnc(Nc3ccc(OCc4ccccn4)c(Cl)c3)c12	7.18046	0	[0 1 0 ... 0 0 0]
CHEMBL3133822	Clc1cccc(Nc2ccnc3[nH]c4ccccc4c23)c1	7.18046	0	[1 0 0 ... 0 0 0]
CHEMBL257478	Cc1ccc(Oc2ccc(Nc3ncnc4cccc(O[C@H](C)C(=O)N(C)CCO)c34)cc2C)cn1	7.16115	0	[0 1 0 ... 0 0 0]
CHEMBL245869	Fc1cccc(Cn2ncc3cc(Nc4ncnn5ccc(COC6CCNCC6)c45)ccc32)c1	7.1549	0	[0 0 0 ... 0 1 0]
CHEMBL393848	N[C@@H]1CCN(Cc2ccn3ncnc(Nc4ccc5c(cnn5Cc5cccc(F)c5)c4)c23)C1	7.1549	0	[0 0 0 ... 0 1 0]
CHEMBL194337	CN1CCC(Oc2cccc3ncnc(Nc4ccc(OCc5ccccn5)cc4)c23)CC1	7.1549	0	[0 0 0 ... 0 0 0]
CHEMBL1645477	COc1ccc(Nc2ncnn3ccc(CN4CCC(N)CC4)c23)cc1Cl	7.1549	0	[0 0 0 ... 0 0 0]
CHEMBL398793	CC1CNCCN(Cc2ccn3ncnc(Nc4ccc5c(cnn5Cc5cccc(F)c5)c4)c23)C1	7.13077	0	[0 0 0 ... 0 1 0]
CHEMBL393787	O[C@@H]1CNCCN(Cc2ccn3ncnc(Nc4ccc5c(cnn5Cc5cccc(F)c5)c4)c23)C1	7.11919	0	[1 0 0 ... 0 1 0]
CHEMBL392664	Fc1cccc(Cn2ncc3cc(Nc4ncnn5ccc(CNC6CCNCC6)c45)ccc32)c1	7.11919	0	[0 0 0 ... 0 1 0]
CHEMBL3633774	NC(=O)Nc1ccc2ncnc(Nc3ccc(Oc4cccc(C(F)(F)F)c4)c(Cl)c3)c2c1	7.11351	0	[0 0 0 ... 0 0 0]
CHEMBL578255	CCC1=C2C(Nc3ccc4c(cnn4Cc4ccccc4)c3)=NC=NC2N=C1NC(=O)OCCN1CCOCC1	7.11351	0	[0 0 0 ... 0 1 1]
CHEMBL430410	Cc1ccc(Oc2ccc(Nc3ncnc4cccc(O[C@@H](C)C(=O)N(C)CCO)c34)cc2C)cn1	7.10791	0	[0 1 0 ... 0 0 0]
CHEMBL256060	C[C@H](Oc1cccc2ncnc(Nc3ccc(OCc4ccccn4)c(Cl)c3)c12)C(=O)N(C)CCO	7.10237	0	[0 1 0 ... 0 0 0]
CHEMBL402657	C[C@H](Oc1cccc2ncnc(Nc3ccc4c(cnn4Cc4ccccn4)c3)c12)C(=O)N(C)C	7.09691	0	[0 1 0 ... 0 1 0]
CHEMBL472545	Nc1ncnc(Nc2ccc(OCc3ccccc3)c(Cl)c2)c1-c1nnc(CCN2CCOCC2)o1	7.09691	0	[0 0 0 ... 0 0 0]
CHEMBL231875	Fc1cccc(Cn2ncc3cc(Nc4ncnn5ccc(CN6CCNCC6)c45)ccc32)c1	7.09151	0	[0 0 0 ... 0 1 0]
CHEMBL248891	COCc1cccc2[nH]c(-c3n[nH]c4ncc(-c5cncc6ccccc56)cc34)nc12	7.07058	0	[0 0 0 ... 1 0 0]
CHEMBL427671	Cc1ccn2ncnc(Nc3ccc4c(cnn4Cc4cccc(F)c4)c3)c12	7.05552	0	[0 0 0 ... 0 1 0]
CHEMBL249303	CCN(CC)Cc1cccc2[nH]c(-c3n[nH]c4ncc(-c5cncc6ccccc56)cc34)nc12	7.05061	0	[0 0 0 ... 1 0 0]
CHEMBL402011	C[C@@H](Oc1cccc2ncnc(Nc3ccc4c(cnn4Cc4ccccn4)c3)c12)C(=O)N(C)C	7.04576	0	[0 1 0 ... 0 1 0]
CHEMBL230995	COc1ccc2ncnc(Nc3ccc(OC4CCN(C(=O)CC(C)(C)C)CC4)c(C)c3)c2c1	7.01773	0	[0 0 0 ... 0 0 0]
CHEMBL2348419	COC(=O)C1=Cc2c(ncnc2Nc2ccc(Oc3cccc(C(F)(F)F)c3)c(Cl)c2)NCC1	7	0	[0 0 0 ... 0 0 0]
CHEMBL516487	COC(=O)c1c(N)ncnc1Nc1ccc(OCc2ccccc2)c(Cl)c1	7	0	[0 0 0 ... 0 0 0]
CHEMBL230994	COc1cc2ncnc(Nc3ccc(OC4CCN(C(=O)CC(C)(C)C)CC4)c(C)c3)c2cc1OC	7	0	[0 0 0 ... 0 0 0]
CHEMBL438536	Cc1cc(Nc2ncnc3[nH]nc(OCCN4CCC(O)CC4)c23)ccc1OCc1cccc(F)c1	6.97062	0	[0 0 0 ... 0 0 0]
CHEMBL218677	COc1cc2ncnc(Nc3cccc(Cl)c3F)c2cc1OC1CCN(CC(N)=O)CC1	6.97062	0	[0 0 0 ... 0 0 0]
CHEMBL234772	O=C(O)C1CCN(Cc2ccn3ncnc(Nc4ccc5c(cnn5Cc5cccc(F)c5)c4)c23)CC1	6.95861	0	[0 0 0 ... 0 1 0]
CHEMBL194958	CCc1c(C(N)=O)cn2ncnc(Nc3ccc4c(cnn4Cc4ccccc4)c3)c12	6.95861	0	[0 0 0 ... 0 1 0]
CHEMBL247309	CN(C)C1CCN(Cc2ccn3ncnc(Nc4ccc5c(cnn5Cc5cccc(F)c5)c4)c23)CC1	6.95861	0	[0 0 0 ... 0 1 0]
CHEMBL391521	CN(CCO)Cc1ccn2ncnc(Nc3ccc4c(cnn4Cc4cccc(F)c4)c3)c12	6.95861	0	[0 0 0 ... 0 1 0]
CHEMBL246276	OCc1ccn2ncnc(Nc3ccc4c(cnn4Cc4cccc(F)c4)c3)c12	6.95861	0	[0 0 0 ... 0 1 0]
CHEMBL246694	NC(=O)COCc1ccn2ncnc(Nc3ccc4c(cnn4Cc4cccc(F)c4)c3)c12	6.95861	0	[0 0 0 ... 0 1 0]
CHEMBL429827	Cc1ccn2ncnc(Nc3ccc4c(cnn4Cc4ccccc4)c3)c12	6.95861	0	[0 0 0 ... 0 1 0]
CHEMBL3092308	O=C(NCCN1CCCC1)Nc1cc2c(Nc3ccc(F)c(Cl)c3)ncnc2cc1O[C@H]1CCOC1	6.95078	0	[0 0 0 ... 0 0 0]
CHEMBL473427	Fc1cccc(COc2ccc(Nc3ncnc4cc(-c5cccs5)sc34)cc2Cl)c1	6.94692	0	[0 0 0 ... 0 0 0]
CHEMBL388978	CN[C@@H]1C[C@H]2O[C@@](C)([C@@H]1OC)n1c3ccccc3c3c4c(c5c6ccccc6n2c5c31)C(=O)NC4	6.9393	0	[0 0 0 ... 0 0 0]
CHEMBL2408046	CCNC(=O)CN1CCC(Oc2cc3c(Nc4cccc(Cl)c4F)ncnc3cc2OC)CC1	6.92082	0	[0 0 0 ... 0 0 0]
CHEMBL232082	CN1CCN(Cc2ccn3ncnc(Nc4ccc5c(cnn5Cc5cccc(F)c5)c4)c23)CC1	6.92082	0	[0 0 0 ... 0 1 0]
CHEMBL246072	Fc1cccc(Cn2ncc3cc(Nc4ncnn5ccc(COCC6CCNCC6)c45)ccc32)c1	6.92082	0	[0 0 0 ... 0 1 0]
CHEMBL234577	CN1CCCN(Cc2ccn3ncnc(Nc4ccc5c(cnn5Cc5cccc(F)c5)c4)c23)CC1	6.92082	0	[0 0 0 ... 0 1 0]
CHEMBL400413	CS(=O)(=O)N1CCCN(Cc2ccn3ncnc(Nc4ccc5c(cnn5Cc5cccc(F)c5)c4)c23)CC1	6.92082	0	[0 0 0 ... 0 1 0]
CHEMBL1922904	FC(F)(F)c1ccccc1Oc1ccc(Nc2ncnc3cc[nH]c23)cc1Cl	6.92082	0	[0 0 0 ... 0 0 0]
CHEMBL258353	CN(CCO)C(=O)COc1cccc2ncnc(Nc3ccc(OCc4ccccn4)c(Cl)c3)c12	6.92082	0	[0 0 0 ... 0 0 0]
CHEMBL247513	O=C(CO)NC1CCN(Cc2ccn3ncnc(Nc4ccc5c(cnn5Cc5cccc(F)c5)c4)c23)CC1	6.92082	0	[0 0 0 ... 0 1 0]
CHEMBL473436	Fc1cccc(COc2ccc(Nc3ncnc4cc(-c5ccc[nH]5)sc34)cc2Cl)c1	6.91721	0	[0 0 0 ... 0 0 0]
CHEMBL473428	OCc1ccc(-c2cc3ncnc(Nc4ccc(OCc5cccc(F)c5)c(Cl)c4)c3s2)o1	6.91364	0	[0 0 0 ... 0 0 0]
CHEMBL3977326	CCC(=O)Nc1cc2c(Nc3ccc4c(ccn4Cc4ccccc4)c3)ncnc2cc1OC	6.90658	0	[0 0 0 ... 0 0 0]
CHEMBL3633932	CCNC(=O)Nc1ccc2ncnc(Nc3ccc(OCc4cccc(F)c4)c(Cl)c3)c2c1	6.89963	0	[0 0 0 ... 0 0 0]
CHEMBL258270	CC(=O)N1CCN(CCOc2n[nH]c3ncnc(Nc4ccc(OCc5ccccn5)c(Cl)c4)c23)CC1	6.88941	0	[0 0 0 ... 0 0 0]
CHEMBL394495	C[C@H](c1ccccc1)n1ncc2cc(Nc3ncnn4ccc(COC[C@@H]5CNCCO5)c34)ccc21	6.88606	0	[0 1 0 ... 0 0 0]
CHEMBL256996	C[C@H](Oc1cccc2ncnc(Nc3ccc4c(cnn4Cc4cscn4)c3)c12)C(=O)N(C)C	6.88606	0	[0 1 0 ... 0 1 0]
CHEMBL255337	Cc1ccc(Oc2ccc(Nc3ncnc4cccc(OCC(=O)N(C)CCO)c34)cc2C)cn1	6.88606	0	[0 0 0 ... 0 0 0]
CHEMBL2048792	O=C1Cc2ccc(Oc3ccc(Nc4ncnc5ccn(CCO)c45)cc3Cl)cc2N1	6.88606	0	[0 0 0 ... 0 0 0]
CHEMBL197689	CCc1c(C(=O)NC)cn2ncnc(Nc3ccc4c(cnn4Cc4ccccc4)c3)c12	6.88606	0	[0 0 0 ... 0 1 0]
CHEMBL1336	CNC(=O)c1cc(Oc2ccc(NC(=O)Nc3ccc(Cl)c(C(F)(F)F)c3)cc2)ccn1	6.88273	0	[0 0 0 ... 0 0 0]
CHEMBL1928946	CC(=O)Nc1cccc(Oc2cc(Nc3ccc(OCc4cccc(F)c4)c(Cl)c3)ncn2)c1	6.86967	0	[0 0 0 ... 0 0 0]
CHEMBL395591	Fc1cccc(Cn2ncc3cc(Nc4ncnn5ccc(COCC6CNCCOC6)c45)ccc32)c1	6.85387	0	[0 0 0 ... 0 1 0]
CHEMBL1683955	Cc1ncnc(Nc2ccc(OCc3cccc(F)c3)c(Cl)c2)c1C	6.85387	0	[0 0 0 ... 0 0 0]
CHEMBL257196	C[C@@H](Oc1cccc2ncnc(Nc3ccc4c(cnn4Cc4cscn4)c3)c12)C(N)=O	6.85387	0	[0 1 0 ... 0 1 0]
CHEMBL391437	c1ccc2c(-c3cnc4[nH]nc(-c5nc6ccccc6[nH]5)c4c3)cncc2c1	6.85387	0	[0 0 0 ... 1 0 0]
CHEMBL413997	C[C@H](Oc1cccc2ncnc(Nc3ccc4c(cnn4Cc4ccccn4)c3)c12)C(=O)N1CCOCC1	6.85387	0	[0 1 0 ... 0 1 0]
CHEMBL258354	O=C(COc1cccc2ncnc(Nc3ccc(OCc4ccccn4)c(Cl)c3)c12)N1CCOCC1	6.85387	0	[0 0 0 ... 0 0 0]
CHEMBL5194543	Cc1ccc(-c2c(CN3CCCCC3)nc3scc(C(=O)O)n23)cc1	6.83565	0	[0 0 1 ... 0 0 0]
CHEMBL270448	Clc1cc(Nc2ncnc3[nH]nc(OCCN4CCCCCO4)c23)ccc1OCc1ccccn1	6.82974	0	[0 0 1 ... 0 0 0]
CHEMBL2048793	O=C1NCc2c(Oc3ccc(Nc4ncnc5ccn(CCO)c45)cc3Cl)cccc21	6.82391	0	[0 0 0 ... 0 0 0]
CHEMBL3948084	CCC(=O)Nc1cc2c(Nc3ccc4c(cnn4Cc4ccccc4)c3)ncnc2cc1OC	6.81531	0	[0 0 0 ... 0 1 0]
CHEMBL404327	C[C@@H](Oc1cccc2ncnc(Nc3ccc4c(cnn4Cc4cscn4)c3)c12)C(=O)N1CCOCC1	6.79588	0	[0 1 0 ... 0 1 0]
CHEMBL392774	COC1CNCCN(Cc2ccn3ncnc(Nc4ccc5c(cnn5Cc5cccc(F)c5)c4)c23)C1	6.76955	0	[0 0 0 ... 0 1 0]
CHEMBL246073	Fc1cccc(Cn2ncc3cc(Nc4ncnn5ccc(COC[C@H]6CCCNC6)c45)ccc32)c1	6.76955	0	[0 0 0 ... 0 1 0]
CHEMBL5199520	NS(=O)(=O)c1ccc(CCn2c(SCC(=O)Nc3ccc(Cl)cc3)nc3ccccc3c2=O)cc1	6.76955	0	[0 0 0 ... 0 0 0]
CHEMBL247711	COc1cn2ncnc(Nc3ccc4c(cnn4Cc4cccc(F)c4)c3)c2c1CN1CCCNCC1	6.76955	0	[0 0 0 ... 0 1 0]
CHEMBL196925	CCOC(=O)c1cn2ncnc(Nc3ccc4c(cnn4Cc4ccccc4)c3)c2c1CC	6.74473	0	[0 0 0 ... 0 1 0]
CHEMBL247512	CC(=O)NC1CCN(Cc2ccn3ncnc(Nc4ccc5c(cnn5Cc5cccc(F)c5)c4)c23)CC1	6.74473	0	[0 0 0 ... 0 1 0]
CHEMBL272929	NC(=O)COc1cccc2ncnc(Nc3ccc(OCc4ccccn4)c(Cl)c3)c12	6.74473	0	[0 0 0 ... 0 0 0]
CHEMBL255170	Cc1ccc(Oc2ccc(Nc3ncnc4[nH]nc(OCCN5CCC(O)CC5)c34)cc2Cl)cn1	6.73518	0	[0 0 0 ... 0 0 0]
CHEMBL249496	Nc1ncnc2c1c(-c1ccc3nc(Cc4ccccc4)[nH]c3c1)nn2[C@H]1CC[C@H](N2CCOCC2)CC1	6.73049	0	[0 0 0 ... 0 0 0]
CHEMBL246898	CS(=O)(=O)CCNC1CCN(Cc2ccn3ncnc(Nc4ccc5c(cnn5Cc5cccc(F)c5)c4)c23)CC1	6.72125	0	[0 0 0 ... 0 1 0]
CHEMBL247916	NC1CCN(Cc2ccn3ncnc(Nc4ccc5c(cnn5Cc5ccncc5)c4)c23)CC1	6.72125	0	[0 0 0 ... 0 1 0]
CHEMBL157084	CS(=O)(=O)CCNc1nc(-c2ccc3ncnc(Nc4ccc(F)c(Cl)c4)c3c2)cs1	6.69897	0	[0 0 0 ... 0 0 0]
CHEMBL181742	Clc1cc(Nc2ncnc3nn4ccccc4c23)ccc1OCc1ccccc1	6.69897	0	[0 0 0 ... 0 0 0]
CHEMBL3325477	CCOC(=O)C1=C(N)N(c2cccnc2)C2=C(C(=O)CCC2)C1c1cc2ccccc2n2nnnc12	6.69897	0	[0 0 0 ... 0 0 0]
CHEMBL196738	CCOC(=O)c1cn2ncnc(Nc3ccc4c(cnn4Cc4ccccc4)c3)c2c1C	6.69897	0	[0 0 0 ... 0 1 0]
CHEMBL265629	O=C1CN(Cc2ccn3ncnc(Nc4ccc5c(cnn5Cc5cccc(F)c5)c4)c23)CCN1	6.69897	0	[0 0 0 ... 0 1 0]
CHEMBL271668	Cc1ccc(Oc2ccc(Nc3ncnc4cccc(O[C@H](C)C(=O)NCCO)c34)cc2C)cn1	6.69897	0	[0 1 0 ... 0 0 0]
CHEMBL483082	Nc1nc(Nc2ccc(S(N)(=O)=O)cc2)nn1C(=O)c1sccc1-n1cccc1	6.69897	0	[0 0 0 ... 0 0 0]
CHEMBL475600	Fc1cccc(COc2ccc(Nc3ncnc4sc(-c5ccc[nH]5)cc34)cc2Cl)c1	6.6925	0	[0 0 0 ... 0 0 0]
CHEMBL365606	CCOC(=O)c1cn2ncnc(Nc3ccc4c(cnn4Cc4ccccc4)c3)c2c1C(C)C	6.67778	0	[0 1 0 ... 0 1 0]
CHEMBL2408209	CNC(=O)CN1CCCC(Oc2cc3c(Nc4cccc(Cl)c4F)ncnc3cc2OC)C1	6.63827	0	[0 0 0 ... 0 0 0]
CHEMBL256995	C[C@@H](Oc1cccc2ncnc(Nc3ccc4c(cnn4Cc4cscn4)c3)c12)C(=O)N(C)C	6.63827	0	[0 1 0 ... 0 1 0]
CHEMBL5171922	FC(F)(F)c1ccc(/C=C/c2nc(CNc3cccc(Br)c3)co2)cc1	6.63827	0	[0 0 0 ... 0 0 0]
CHEMBL1091613	O=C(Nc1cccc(-c2nc3sccn3c2-c2ccncc2)c1)c1ccccc1Cl	6.61979	0	[0 1 0 ... 0 0 0]
CHEMBL257410	CNC(=O)[C@@H](C)Oc1cccc2ncnc(Nc3ccc4c(cnn4Cc4nccs4)c3)c12	6.61979	0	[0 1 0 ... 0 1 0]
CHEMBL248890	OCc1cccc2[nH]c(-c3n[nH]c4ncc(-c5cncc6ccccc56)cc34)nc12	6.61979	0	[0 0 0 ... 1 0 0]
CHEMBL394463	Cc1ccn2ncnc(Nc3ccc4c(cnn4Cc4cccnc4)c3)c12	6.60206	0	[0 0 0 ... 0 1 0]
CHEMBL2408210	CNC(=O)CN1CCC(Oc2cc3c(Nc4cccc(Cl)c4F)ncnc3cc2OC)C1	6.60206	0	[0 0 0 ... 0 0 0]
CHEMBL248877	Nc1ncnc2c1c(-c1ccc3nc(Cc4cccs4)[nH]c3c1)nn2[C@H]1CC[C@H](N2CCOCC2)CC1	6.60206	0	[0 0 0 ... 0 0 0]
CHEMBL5187375	Cc1nn(-c2ccc(F)cc2)c2c(Nc3ccc(F)c(Cl)c3)ncnc12	6.60206	0	[0 0 0 ... 0 0 0]
CHEMBL395883	COc1cn2ncnc(Nc3ccc4c(cnn4Cc4cccc(F)c4)c3)c2c1COC[C@@H]1CNCCO1	6.60206	0	[0 0 0 ... 0 1 0]
CHEMBL4792279	Cc1nn(-c2ccc(F)cc2)c2ncnc(Nc3ccc(F)c(Cl)c3)c12	6.59517	0	[0 0 0 ... 0 0 0]
CHEMBL14932	Oc1ccc2ncnc(Nc3ccc(OCc4ccccc4)cc3)c2c1	6.58004	0	[0 0 0 ... 0 0 0]
CHEMBL2408050	CNC(=O)CN1CCC(Oc2cc3c(Nc4ccc(F)c(Cl)c4)ncnc3cc2OC)CC1	6.5784	0	[0 0 0 ... 0 0 0]
CHEMBL503638	CCOC(=O)N1CCN([C@H]2CC[C@H](n3nc(-c4ccc5nc(Cc6ccccc6OC)[nH]c5c4)c4c(N)ncnc43)CC2)CC1	6.56864	0	[0 0 0 ... 0 0 0]
CHEMBL3633940	NC(=O)Nc1ccc(C(=O)Nc2ccc3ncnc(Nc4ccc(F)c(Cl)c4)c3c2)cc1	6.56067	0	[0 0 0 ... 0 0 0]
CHEMBL246491	COC(=O)COCc1ccn2ncnc(Nc3ccc4c(cnn4Cc4cccc(F)c4)c3)c12	6.55284	0	[0 0 0 ... 0 1 0]
CHEMBL3981041	CCC(=O)Nc1cc2c(Nc3ccc4c(ccn4S(=O)(=O)c4ccccc4)c3)ncnc2cc1OC	6.54363	0	[0 0 0 ... 0 0 0]
CHEMBL3633928	NC(=O)Nc1ccc2ncnc(Nc3ccc(OCc4cccc(F)c4)c(Cl)c3)c2c1	6.54212	0	[0 0 0 ... 0 0 0]
CHEMBL1358485	CCN(CC)CC1CCN(c2ncc3ncnc(Nc4ccc(F)c(Cl)c4)c3n2)CC1	6.5376	0	[0 0 0 ... 0 0 0]
CHEMBL3133824	O=S(=O)(c1ccc2[nH]c3nccc(Nc4cccc(O)c4)c3c2c1)N1CCOCC1	6.52578	0	[1 0 0 ... 0 0 0]
CHEMBL15202	COc1ccc2ncnc(Nc3ccc(OCc4ccccc4)cc3)c2c1	6.51004	0	[0 0 0 ... 0 0 0]
CHEMBL398388	NC(=O)C1CCN(Cc2ccn3ncnc(Nc4ccc5c(cnn5Cc5cccc(F)c5)c4)c23)CC1	6.50864	0	[0 0 0 ... 0 1 0]
CHEMBL3133823	Clc1ccc(Nc2ccnc3[nH]c4ccccc4c23)cc1	6.50864	0	[1 0 0 ... 0 0 0]
CHEMBL394462	Cc1ccn2ncnc(Nc3ccc4c(cnn4Cc4ccccn4)c3)c12	6.50864	0	[0 0 0 ... 0 1 0]
CHEMBL258352	CN1CCN(C(=O)COc2cccc3ncnc(Nc4ccc(OCc5ccccn5)c(Cl)c4)c23)CC1	6.45593	0	[0 0 0 ... 0 0 0]
CHEMBL1645464	Cn1ncc2cc(Nc3ncnn4ccc(CN5CCC(N)CC5)c34)ccc21	6.4437	0	[0 0 0 ... 0 0 0]
CHEMBL391675	Fc1cccc(Cn2ncc3cc(Nc4ncnn5ccc(CN6CCCC6)c45)ccc32)c1	6.4437	0	[0 0 0 ... 0 1 0]
CHEMBL2408052	CNC(=O)CN1CCC(Oc2cc3c(Nc4cccc(Cl)c4)ncnc3cc2OC)CC1	6.4437	0	[0 0 0 ... 0 0 0]
CHEMBL3133832	O=S(=O)(c1ccc2[nH]c3nccc(Nc4cccc(O)c4)c3c2c1)N1CCN(CCO)CC1	6.42481	0	[1 0 0 ... 0 0 0]
CHEMBL396079	c1ccc(Cn2ncc3cc(Nc4ncnn5ccc(COC[C@@H]6CNCCO6)c45)ccc32)nc1	6.42022	0	[0 0 0 ... 0 1 0]
CHEMBL3133828	COc1cccc(Nc2ccnc3[nH]c4ccc(S(=O)(=O)N5CCNCC5)cc4c23)c1	6.40894	0	[1 0 0 ... 0 0 0]
CHEMBL425738	CCOC(=O)c1cc2c(Nc3ccc4c(cnn4Cc4ccccc4)c3)ncnn2c1	6.40894	0	[0 0 0 ... 0 1 0]
CHEMBL3934034	CCC(=O)Nc1cc2c(Nc3ccc(OCc4ccccc4)cc3)ncnc2cc1OC	6.39362	0	[0 0 0 ... 0 0 0]
CHEMBL3930316	CCC(=O)Nc1cc2c(Nc3ccc(F)c(Cl)c3)ncnc2cc1OC	6.39147	0	[0 0 0 ... 0 0 0]
CHEMBL2408048	COc1cc2ncnc(Nc3cccc(Cl)c3F)c2cc1OC1CCN(CC(=O)NC(C)C)CC1	6.38722	0	[0 1 0 ... 0 0 0]
CHEMBL247127	c1cncc(Cn2ncc3cc(Nc4ncnn5ccc(COC[C@@H]6CNCCO6)c45)ccc32)c1	6.38722	0	[0 0 0 ... 0 1 0]
CHEMBL3943512	CCC(=O)Nc1cc2c(Nc3ccc(Oc4ccccc4)cc3)ncnc2cc1OC	6.37779	0	[0 0 0 ... 0 0 0]
CHEMBL394056	COCc1ccn2ncnc(Nc3ccc4c(cnn4Cc4cccc(F)c4)c3)c12	6.37675	0	[0 0 0 ... 0 1 0]
CHEMBL247101	Cc1ccn2ncnc(Nc3ccc(OCc4cccc(F)c4)c(Cl)c3)c12	6.36653	0	[0 0 0 ... 0 0 0]
CHEMBL5207091	Cc1ccccc1NCc1coc(/C=C/c2ccc(C(F)(F)F)cc2)n1	6.35655	0	[0 0 0 ... 0 0 0]
CHEMBL3961532	CCC(=O)Nc1cc2c(Nc3ccc(OCc4cccc(F)c4)c(Cl)c3)ncnc2cc1OC	6.33913	0	[0 0 0 ... 0 0 0]
CHEMBL500591	N#Cc1c(N)ncnc1Nc1ccc(OCc2ccccc2)c(Cl)c1	6.3279	0	[0 0 0 ... 0 0 0]
CHEMBL258694	Cc1nnc(-c2cn3ncnc(Nc4cnc5[nH]ccc5c4)c3c2C(C)C)o1	6.30103	0	[0 1 0 ... 0 0 0]
CHEMBL372293	CCc1c(C(=O)N(C)C)cn2ncnc(Nc3ccc4c(cnn4Cc4ccccc4)c3)c12	6.30103	0	[0 0 0 ... 0 1 0]
CHEMBL397122	C[C@@H](c1cccc(F)c1)n1ncc2cc(Nc3ncnn4ccc(COC[C@@H]5CNCCO5)c34)ccc21	6.29243	0	[0 1 0 ... 0 0 0]
CHEMBL2408054	CNC(=O)CCN1CCC(Oc2cc3c(Nc4cccc(Cl)c4F)ncnc3cc2OC)CC1	6.25964	0	[0 0 0 ... 0 0 0]
CHEMBL246493	Fc1cccc(COc2ccc(Nc3ncnn4ccc(COC[C@@H]5CNCCO5)c34)cc2Cl)c1	6.25181	0	[0 0 0 ... 0 0 0]
CHEMBL3133829	CCOc1cccc(Nc2ccnc3[nH]c4ccc(S(=O)(=O)N5CCNCC5)cc4c23)c1	6.23958	0	[1 0 0 ... 0 0 0]
CHEMBL246492	Fc1cccc(Cn2ncc3cc(Nc4ncnn5ccc(COC[C@@H]6COCCN6)c45)ccc32)c1	6.22915	0	[0 0 0 ... 0 1 0]
CHEMBL2205030	O=S1(=O)N=S(c2ccc(Br)cc2)c2ccncc21	6.22915	0	[0 0 0 ... 0 0 0]
CHEMBL231885	CC(=O)N1CCN(Cc2ccn3ncnc(Nc4ccc5c(cnn5Cc5cccc(F)c5)c4)c23)CC1	6.21467	0	[0 0 0 ... 0 1 0]
CHEMBL4103370	Clc1ccc(-c2nnc(Cc3nc4ccccc4[nH]3)o2)cc1	6.21467	0	[0 0 0 ... 0 0 0]
CHEMBL1080272	O=C(NCCN1CCCC1)c1cc2cnnc(Nc3ccc(OCc4cccc(F)c4)c(Cl)c3)c2[nH]1	6.20761	0	[0 0 0 ... 0 0 0]
CHEMBL3968839	CCC(=O)Nc1cc2c(Nc3ccc4c(ccn4Cc4ccccn4)c3)ncnc2cc1OC	6.19246	0	[0 0 0 ... 0 0 0]
CHEMBL2408049	COc1cc2ncnc(Nc3cccc(Cl)c3F)c2cc1OC1CCN(CC(=O)N(C)C)CC1	6.17393	0	[0 0 0 ... 0 0 0]
CHEMBL3828269	Cn1cc(-c2ccc3ncnc(Nc4ccc(F)c(Cl)c4)c3c2)cn1	6.17005	0	[0 0 0 ... 0 0 0]
CHEMBL372692	CCc1c(CC(=O)O)cn2ncnc(Nc3ccc4c(cnn4Cc4ccccc4)c3)c12	6.16749	0	[0 0 0 ... 0 1 0]
CHEMBL3133830	COc1cccc(Nc2ccnc3[nH]c4ccc(S(=O)(=O)N5CCN(CCO)CC5)cc4c23)c1	6.16178	0	[1 0 0 ... 0 0 0]
CHEMBL3633775	NC(=O)Nc1ccc2ncnc(Nc3ccc(Oc4ccc(Cl)c(Cl)c4)c(Cl)c3)c2c1	6.1512	0	[0 0 0 ... 0 0 0]
CHEMBL479800	Fc1cccc(COc2ccc(Nc3ncnc4cc(-c5ccco5)sc34)cc2Cl)c1	6.14935	0	[0 0 0 ... 0 0 0]
CHEMBL1421	Cc1nc(Nc2ncc(C(=O)Nc3c(C)cccc3Cl)s2)cc(N2CCN(CCO)CC2)n1	6.14874	0	[0 0 0 ... 0 0 0]
CHEMBL458997	CNC(=O)c1ccccc1Nc1nc(Nc2ccc(N3CCOCC3)cc2OC)ncc1Cl	6.14874	0	[0 0 0 ... 0 0 0]
CHEMBL1922903	N#Cc1ccc(Oc2ccc(Nc3ncnc4cc[nH]c34)cc2Cl)cc1	6.14267	0	[0 0 0 ... 0 0 0]
CHEMBL373025	CCc1c(CO)cn2ncnc(Nc3ccc4c(cnn4Cc4ccccc4)c3)c12	6.13668	0	[0 0 0 ... 0 1 0]
CHEMBL521284	c1ccc(Oc2ccc(Nc3ccnc4ccccc34)cc2)cc1	6.1349	0	[0 0 0 ... 0 0 0]
CHEMBL233324	O=C1CCN(Cc2ccn3ncnc(Nc4ccc5c(cnn5Cc5cccc(F)c5)c4)c23)CCN1	6.12494	0	[0 0 0 ... 0 1 0]
CHEMBL512391	Nc1ncnc(Nc2ccc(OCc3ccccc3)c(Cl)c2)c1C(=O)O	6.11014	0	[0 0 0 ... 0 0 0]
CHEMBL461114	Nc1ncnc(Nc2ccc(OCc3ccccc3)c(Cl)c2)c1C(=O)Nc1ccccc1	6.11014	0	[0 0 0 ... 0 0 0]
CHEMBL3964380	CCC(=O)Nc1cc2c(Nc3ccc4c(ccn4Cc4ccco4)c3)ncnc2cc1OC	6.10679	0	[0 0 0 ... 0 0 0]
CHEMBL3970738	CCC(=O)Nc1cc2c(Nc3ccc(NS(=O)(=O)c4ccccc4)cc3)ncnc2cc1OC	6.098	0	[0 0 0 ... 0 0 0]
CHEMBL3963723	CCC(=O)Nc1cc2c(Nc3ccc4[nH]ccc4c3)ncnc2cc1OC	6.09691	0	[0 0 0 ... 0 0 0]
CHEMBL3925158	CCC(=O)Nc1cc2c(Nc3ccc(OCc4ccccn4)cc3)ncnc2cc1OC	6.08884	0	[0 0 0 ... 0 0 0]
CHEMBL5201807	Cc1cccc(-c2ccc3c(ccn3Cc3coc(/C=C/c4ccc(C(F)(F)F)cc4)n3)c2)c1	6.08619	0	[0 0 0 ... 0 0 0]
CHEMBL194349	CCOC(=O)c1cn2ncnc(Nc3ccc(Oc4ccccc4)cc3)c2c1CC	6.08619	0	[0 0 0 ... 0 0 0]
CHEMBL1082012	Cc1c(C(=O)NCCN2CCN(C)CC2)[nH]c2cnnc(Nc3ccc(OCc4cccc(F)c4)c(Cl)c3)c12	6.07417	0	[0 0 0 ... 0 0 0]
CHEMBL245277	C[C@@H](c1ccccc1)n1ncc2cc(Nc3ncnn4ccc(COC[C@@H]5CNCCO5)c34)ccc21	6.07058	0	[0 1 0 ... 0 0 0]
CHEMBL3633941	CCNC(=O)Nc1ccc(C(=O)Nc2ccc3ncnc(Nc4ccc(F)c(Cl)c4)c3c2)cc1	6.06803	0	[0 0 0 ... 0 0 0]
CHEMBL2408053	CNC(=O)CN1CCC(Oc2cc3c(Nc4cc(Cl)ccc4F)ncnc3cc2OC)CC1	6.0655	0	[0 0 0 ... 0 0 0]
CHEMBL5189871	Cc1cccc(NCc2coc(/C=C/c3ccc(C(F)(F)F)cc3)n2)c1	6.0655	0	[0 0 0 ... 0 0 0]
CHEMBL3828079	Cn1cc(-c2ccc3ncnc(Nc4ccc5ncccc5c4)c3c2)cn1	6.05849	0	[0 0 0 ... 0 0 0]
CHEMBL1645468	CC(C)Nc1ncnn2ccc(CN3CCC(N)CC3)c12	6.05552	0	[0 1 0 ... 0 0 0]
CHEMBL4084249	COc1ccc(-c2nnc(Cc3nc4ccccc4[nH]3)o2)cc1	6.04096	0	[0 0 0 ... 0 0 0]
CHEMBL1080990	CCOC(=O)c1[nH]c(C)c2cnnc(Nc3ccc(OCc4cccc(F)c4)c(Cl)c3)c12	6.02965	0	[0 0 0 ... 0 1 0]
CHEMBL3923650	CCC(=O)Nc1cc2c(Nc3ccc(NS(=O)(=O)c4ccccc4)nc3)ncnc2cc1OC	6.01863	0	[0 0 0 ... 0 0 0]
CHEMBL3133820	Cc1ccccc1Nc1ccnc2[nH]c3ccccc3c12	6.00966	0	[0 0 0 ... 0 0 0]
CHEMBL3921390	COc1cc2c(Nc3ccc(Cl)c(Cl)c3C)ncnc2cc1OCC1CN(C)CCO1	6	0	[0 0 0 ... 0 0 0]
CHEMBL3921861	COc1cc2c(Nc3ccc(Br)c(Cl)c3)ncnc2cc1O[C@H]1CO[C@H]2[C@@H]1OC[C@@H]2N1CCOCC1	6	0	[0 0 0 ... 0 0 0]
CHEMBL4568087	Cn1cc(-c2cnc3c(-c4csc(C(=O)N[C@@H]5CCCC[C@@H]5N)c4)cnn3c2)cn1	6	0	[0 0 0 ... 0 0 0]
CHEMBL1917092	COC(=O)c1ccc2c(c1)S(=O)(=O)N=S2c1ccc(Br)cc1	6	0	[0 0 0 ... 0 0 0]
CHEMBL3891059	COc1cc2c(Nc3ccc(C)c(Cl)c3Cl)ncnc2cc1OCC1CN(C)CCO1	6	0	[0 0 0 ... 0 0 0]
CHEMBL3985116	COc1cc2c(Nc3ccc(Cl)c(Cl)c3N3CCN(C)CC3)ncnc2cc1O[C@H]1CO[C@H]2[C@@H]1OC[C@@H]2F	6	0	[0 0 0 ... 0 0 0]
CHEMBL3895458	COc1cc2c(Nc3cccc(Br)c3C)ncnc2cc1O[C@H]1CO[C@H]2[C@@H]1OC[C@@H]2OC	6	0	[0 0 0 ... 0 0 0]
CHEMBL3929354	COc1cc2c(Nc3ccc(Br)c(Cl)c3)ncnc2cc1O[C@H]1CO[C@H]2[C@@H]1OC[C@H]2OC	6	0	[0 0 0 ... 0 0 0]
CHEMBL3893058	COc1cc2c(Nc3ccc(N4CCN(C)CC4)c(Cl)c3Cl)ncnc2cc1O[C@H]1CO[C@H]2[C@@H]1OC[C@@H]2F	6	0	[0 0 0 ... 0 0 0]
CHEMBL3971560	COc1cc2c(Nc3ccc(Br)c(Cl)c3)ncnc2cc1OC1CCN(C)C1	6	0	[0 0 0 ... 0 0 0]
CHEMBL3959160	COc1cc2c(Nc3cccc(Cl)c3C)ncnc2cc1O[C@H]1CO[C@H]2[C@@H]1OC[C@@H]2OC	6	0	[0 0 0 ... 0 0 0]
CHEMBL3961417	COc1cc2c(Nc3ccc(Br)c(Cl)c3)ncnc2cc1O[C@H]1CO[C@H]2[C@@H]1OC[C@@H]2NC(C)=O	6	0	[0 0 0 ... 0 0 0]
CHEMBL3972940	COc1cc2c(Nc3ccc(Br)c(Cl)c3)ncnc2cc1O[C@H]1CO[C@H]2[C@@H]1OC[C@@H]2N1CCN(C)CC1	6	0	[0 0 0 ... 0 0 0]
CHEMBL3976788	COc1cc2c(Nc3ccc(Br)c(Cl)c3)ncnc2cc1O[C@H]1CO[C@H]2[C@@H]1OC[C@@H]2N	6	0	[0 0 0 ... 0 0 0]
CHEMBL3923645	COc1cc2c(Nc3ccc(Br)c(Cl)c3)ncnc2cc1O[C@H]1CO[C@H]2[C@@H]1OC[C@@H]2N1CCCC1	6	0	[0 0 0 ... 0 0 0]
CHEMBL400858	Cc1cccc2[nH]c(-c3n[nH]c4ncc(-c5cncc6ccccc56)cc34)nc12	6	0	[0 0 0 ... 1 0 0]
CHEMBL3974328	CN[C@H]1CO[C@H]2[C@@H]1OC[C@@H]2Oc1cc2ncnc(Nc3ccc(Br)c(Cl)c3)c2cc1OC	6	0	[0 0 0 ... 0 0 0]
CHEMBL3933359	COc1cc2c(Nc3ccc(Br)c(Cl)c3)ncnc2cc1O[C@H]1CO[C@H]2[C@@H]1OC[C@@H]2OC(C)=O	6	0	[0 0 0 ... 0 0 0]
CHEMBL2325101	Clc1ccc(C2=NN(c3ccccc3)C(c3ccc4ccccc4c3)C2)cc1Cl	5.9914	0	[0 0 0 ... 0 0 0]
CHEMBL305660	CC(C)(C)c1ccc(C(=O)CCCN2CCC(OC(c3ccccc3)c3ccccc3)CC2)cc1	5.97572	0	[0 1 0 ... 1 0 0]
CHEMBL1958215	Cc1ccc(C2=NN(C3=NC(=O)CS3)C(c3ccc(Br)cc3)C2)cc1	5.97062	0	[0 0 0 ... 0 0 0]
CHEMBL5187503	FC(F)(F)c1ccc(/C=C/c2nc(CNc3ccccc3Br)co2)cc1	5.97062	0	[0 0 0 ... 0 0 0]
CHEMBL400569	CCNCc1cncc(-c2cnc3[nH]nc(-c4nc5cc(N6CCN(C)CC6)ccc5[nH]4)c3c2)c1	5.97062	0	[0 0 0 ... 0 0 0]
CHEMBL2408211	CNC(=O)CN1CC(Oc2cc3c(Nc4cccc(Cl)c4F)ncnc3cc2OC)C1	5.95861	0	[0 0 0 ... 0 0 0]
CHEMBL197525	COc1ccc(Nc2ncnc3cccc(OC4CCN(C)CC4)c23)cc1Cl	5.95861	0	[0 0 0 ... 0 0 0]
CHEMBL464210	CNC(=O)c1cc(Nc2ccc(-c3nc4ccccc4s3)cc2)ccn1	5.95861	0	[0 0 0 ... 0 0 0]
CHEMBL5174917	COc1ccc(-c2ccc3c(ccn3Cc3coc(/C=C/c4ccc(C(F)(F)F)cc4)n3)c2)cc1	5.95468	0	[0 0 0 ... 0 0 0]
CHEMBL2325100	Cc1ccc(C2=NN(c3ccccc3)C(c3ccc4ccccc4c3)C2)cc1	5.94692	0	[0 0 0 ... 0 0 0]
CHEMBL3133814	Clc1cccc(Nc2ccnc3[nH]c4ccc(Br)cc4c23)c1	5.9393	0	[1 0 0 ... 0 0 0]
CHEMBL3133819	CC(=O)c1ccc2[nH]c3nccc(Nc4cccc(Cl)c4)c3c2c1	5.9393	0	[1 0 0 ... 0 0 0]
CHEMBL438805	CCCc1c(C(=O)OCC)cn2ncnc(Nc3ccc4c(cnn4Cc4ccccc4)c3)c12	5.92082	0	[0 0 0 ... 0 1 0]
CHEMBL3828092	Fc1ccc(Nc2ncnc3ccc(-c4cnn(C5CCNCC5)c4)cc23)cc1Cl	5.9201	0	[0 0 0 ... 0 0 0]
CHEMBL3133825	COc1cccc(Nc2ccnc3[nH]c4ccc(S(=O)(=O)N5CCOCC5)cc4c23)c1	5.90658	0	[1 0 0 ... 0 0 0]
CHEMBL2325098	Brc1ccc(C2=NN(c3ccccc3)C(c3ccc4ccccc4c3)C2)cc1	5.89279	0	[0 0 0 ... 0 0 0]
CHEMBL5186640	FC(F)(F)c1ccc(/C=C/c2nc(CNc3ccc(Cl)cc3)co2)cc1	5.88941	0	[0 0 0 ... 0 0 0]
CHEMBL3133821	Oc1cccc(Nc2ccnc3[nH]c4ccccc4c23)c1	5.88606	0	[1 0 0 ... 0 0 0]
CHEMBL4095253	C=CS(=O)(=O)N1CCC[C@@H]1Cn1cc(-c2ccc3c(c2)OCO3)c2c(N)ncnc21	5.86967	0	[0 0 0 ... 0 0 0]
CHEMBL3827349	c1cnc2ccc(Nc3ncnc4ccc(-c5cnn(C6CCNCC6)c5)cc34)cc2c1	5.86967	0	[0 0 0 ... 0 0 0]
CHEMBL3633933	CCNC(=O)Nc1ccc2ncnc(Nc3ccc(OCc4ccccn4)c(Cl)c3)c2c1	5.85699	0	[0 0 0 ... 0 0 0]
CHEMBL196548	CCOCc1cn2ncnc(Nc3ccc4c(cnn4Cc4ccccc4)c3)c2c1CC	5.85387	0	[0 0 0 ... 0 1 0]
CHEMBL2325099	COc1ccc(C2=NN(c3ccccc3)C(c3ccc4ccccc4c3)C2)cc1	5.83863	0	[0 0 0 ... 0 0 0]
CHEMBL2325097	Clc1ccc(C2=NN(c3ccccc3)C(c3ccc4ccccc4c3)C2)cc1	5.83565	0	[0 0 0 ... 0 0 0]
CHEMBL2408212	CNC(=O)CN(C)CCOc1cc2c(Nc3cccc(Cl)c3F)ncnc2cc1OC	5.82391	0	[0 0 0 ... 0 0 0]
CHEMBL461113	Nc1ncnc(Nc2ccc(OCc3ccccc3)c(Cl)c2)c1C(=O)OCCN1CCOCC1	5.81531	0	[0 0 0 ... 0 0 0]
CHEMBL361322	c1ccc(Cc2nc3cc(Nc4ncnc5nn6ccccc6c45)ccc3[nH]2)cc1	5.80134	0	[0 0 0 ... 0 0 0]
CHEMBL462162	COc1cc(Nc2ncnc3[nH]ccc23)ccc1-c1nc2ccccc2s1	5.79588	0	[0 0 0 ... 0 0 0]
CHEMBL5190408	Cc1ccc(NCc2coc(/C=C/c3ccc(C(F)(F)F)cc3)n2)cc1	5.73755	0	[0 0 0 ... 0 0 0]
CHEMBL2325095	c1ccc(C2=NN(c3ccccc3)C(c3ccc4ccccc4c3)C2)cc1	5.72354	0	[0 0 0 ... 0 0 0]
CHEMBL3325473	COC(=O)C1=C(N)N(c2cccnc2)C2=C(C(=O)CCC2)C1c1cc2ccccc2n2nnnc12	5.72125	0	[0 0 0 ... 0 0 0]
CHEMBL2325093	Cc1ccc(C2=NN(c3ccccc3)C(c3cccc4ccccc34)C2)cc1	5.71897	0	[0 0 0 ... 0 0 0]
CHEMBL5179098	Fc1cccc(-c2ccc3c(ccn3Cc3coc(/C=C/c4ccc(C(F)(F)F)cc4)n3)c2)c1	5.7122	0	[0 0 0 ... 0 0 0]
CHEMBL2325094	Clc1ccc(C2=NN(c3ccccc3)C(c3cccc4ccccc34)C2)cc1Cl	5.70333	0	[0 0 0 ... 0 0 0]
CHEMBL2325096	Fc1ccc(C2=NN(c3ccccc3)C(c3ccc4ccccc4c3)C2)cc1	5.6968	0	[0 0 0 ... 0 0 0]
CHEMBL5183608	FC(F)(F)c1ccc(/C=C/c2nc(CNc3cccc(Cl)c3)co2)cc1	5.6968	0	[0 0 0 ... 0 0 0]
CHEMBL3325475	COC(=O)C1=C(N)N(c2cccnc2)C2=C(C(=O)CCC2)C1c1cc2cc(OC)ccc2n2nnnc12	5.67778	0	[0 0 0 ... 0 0 0]
CHEMBL290106	Oc1c(Cl)cc(Cl)cc1Sc1cc(Cl)cc(Cl)c1O	5.66817	0	[0 0 0 ... 0 0 0]
CHEMBL5193804	Fc1ccc(NCc2coc(/C=C/c3ccc(C(F)(F)F)cc3)n2)cc1	5.66354	0	[0 0 0 ... 0 0 0]
CHEMBL5171924	COc1ccccc1-c1ccc2c(ccn2Cc2coc(/C=C/c3ccc(C(F)(F)F)cc3)n2)c1	5.65561	0	[0 0 0 ... 0 0 0]
CHEMBL1958212	Cc1ccc(C2=NN(C3=NC(=O)CS3)C(c3ccccc3)C2)cc1	5.64975	0	[0 0 0 ... 0 0 0]
CHEMBL5181577	FC(F)(F)c1ccc(/C=C/c2nc(Cn3ccc4cc(-c5cccc(Cl)c5)ccc43)co2)cc1	5.64782	0	[0 0 0 ... 0 0 0]
CHEMBL2325091	Brc1ccc(C2=NN(c3ccccc3)C(c3cccc4ccccc34)C2)cc1	5.63451	0	[0 0 0 ... 0 0 0]
CHEMBL194160	CCc1c(CC(N)=O)cn2ncnc(Nc3ccc4c(cnn4Cc4ccccc4)c3)c12	5.61979	0	[0 0 0 ... 0 1 0]
CHEMBL4084996	Clc1ccc(-c2nnc(Cc3nc4ccc(Cl)cc4[nH]3)o2)cc1	5.60206	0	[0 0 0 ... 0 0 0]
CHEMBL1958216	Cc1ccc(C2=NN(C3=NC(=O)CS3)C(c3ccc(C)cc3)C2)cc1	5.5986	0	[0 0 0 ... 0 0 0]
CHEMBL1958221	COc1ccc(C2=NN(C3=NC(=O)CS3)C(c3ccc(Br)cc3)C2)cc1	5.56067	0	[0 0 0 ... 0 0 0]
CHEMBL5186298	FC(F)(F)c1ccc(/C=C/c2nc(CNc3ccccc3Cl)co2)cc1	5.5544	0	[0 1 0 ... 0 0 0]
CHEMBL196018	CCOC(=O)c1cn2ncnc(Nc3ccc(F)c(Cl)c3)c2c1CC	5.55284	0	[0 0 0 ... 0 0 0]
CHEMBL1683956	CCc1ncnc(Nc2ccc(OCc3cccc(F)c3)c(Cl)c2)c1C	5.5376	0	[0 0 0 ... 0 0 0]
CHEMBL370934	CCOC(=O)c1cn2ncnc(Nc3cccc(Br)c3)c2c1CC	5.52288	0	[0 0 0 ... 0 0 0]
CHEMBL2205026	N#Cc1ccc2c(c1)S(=O)(=O)N=S2c1ccc(Br)cc1	5.52288	0	[0 0 0 ... 0 0 0]
CHEMBL2325092	COc1ccc(C2=NN(c3ccccc3)C(c3cccc4ccccc34)C2)cc1	5.52143	0	[0 0 0 ... 0 0 0]
CHEMBL245967	CCNCc1cncc(/C=C/c2c[nH]nc2-c2nc3ccc(OC)cc3[nH]2)c1	5.51856	0	[0 0 0 ... 0 0 0]
CHEMBL1958022	O=C1CSC(N2N=C(c3ccccc3)CC2c2ccc(Br)cc2)=N1	5.5157	0	[0 0 0 ... 0 0 0]
CHEMBL2325090	Clc1ccc(C2=NN(c3ccccc3)C(c3cccc4ccccc34)C2)cc1	5.51286	0	[0 0 0 ... 0 0 0]
CHEMBL5174515	COc1ccccc1NCc1coc(/C=C/c2ccc(C(F)(F)F)cc2)n1	5.51286	0	[0 0 0 ... 0 0 0]
CHEMBL518803	c1ccc2sc(-c3ccc(Nc4ncnc5[nH]ccc45)cc3)nc2c1	5.50864	0	[0 0 0 ... 0 0 0]
CHEMBL1958214	Cc1ccc(C2=NN(C3=NC(=O)CS3)C(c3ccc(Cl)cc3)C2)cc1	5.50724	0	[0 0 0 ... 0 0 0]
CHEMBL5193926	COc1cccc(-c2ccc3c(ccn3Cc3coc(/C=C/c4ccc(C(F)(F)F)cc4)n3)c2)c1	5.48812	0	[0 0 0 ... 0 0 0]
CHEMBL372112	CCOC(=O)c1cn2ncnc(Nc3ccc4[nH]ncc4c3)c2c1CC	5.48149	0	[0 0 0 ... 0 0 0]
CHEMBL258940	CN1CCC(Nc2ncc3ncnc(Nc4ccc(F)c(Cl)c4)c3n2)CC1	5.46852	0	[0 0 0 ... 0 0 0]
CHEMBL382125	CCCCn1c(Sc2cc(OC)ccc2OC)nc2c(N)ncnc21	5.45593	0	[0 0 0 ... 0 0 0]
CHEMBL1958213	Cc1ccc(C2=NN(C3=NC(=O)CS3)C(c3ccc(F)cc3)C2)cc1	5.45223	0	[0 0 0 ... 0 0 0]
CHEMBL5180538	FC(F)(F)c1ccc(/C=C/c2nc(Cn3ccc4cc(-c5ccc(Cl)cc5)ccc43)co2)cc1	5.44612	0	[0 0 0 ... 0 0 0]
CHEMBL2325089	Fc1ccc(C2=NN(c3ccccc3)C(c3cccc4ccccc34)C2)cc1	5.44491	0	[0 0 0 ... 0 0 0]
CHEMBL248712	CCNCc1cncc(-c2cnc3[nH]nc(-c4nc5cc(F)c(F)cc5[nH]4)c3c2)c1	5.4437	0	[0 0 0 ... 0 1 0]
CHEMBL1958209	O=C1CSC(N2N=C(c3ccc(Br)cc3)CC2c2ccc(Br)cc2)=N1	5.43771	0	[0 0 0 ... 0 0 0]
CHEMBL400906	CNCc1cncc(-c2cnc3[nH]nc(-c4nc5cc(OC(F)(F)F)ccc5[nH]4)c3c2)c1	5.41794	0	[0 0 0 ... 0 0 0]
CHEMBL2325088	c1ccc(C2=NN(c3ccccc3)C(c3cccc4ccccc34)C2)cc1	5.4168	0	[0 0 0 ... 0 0 0]
CHEMBL1958034	O=C1CSC(N2N=C(c3ccc(Cl)cc3)CC2c2ccc(Br)cc2)=N1	5.41567	0	[0 0 0 ... 0 0 0]
CHEMBL3325478	CCOC(=O)C1=C(N)N(c2cccnc2)C2=C(C(=O)CCC2)C1c1cc2cc(C)ccc2n2nnnc12	5.38722	0	[0 0 0 ... 0 0 0]
CHEMBL1958218	COc1ccc(C2=NN(C3=NC(=O)CS3)C(c3ccccc3)C2)cc1	5.3851	0	[0 0 0 ... 0 0 0]
CHEMBL429478	CCNCc1cncc(-c2cnc3[nH]nc(-c4nc5cc(OC)ccc5[nH]4)c3c2)c1	5.37986	0	[0 0 0 ... 0 0 0]
CHEMBL1958023	Cc1ccc(C2CC(c3ccccc3)=NN2C2=NC(=O)CS2)cc1	5.33348	0	[0 0 0 ... 0 0 0]
CHEMBL4079125	Clc1ccc(-c2nnc(Cc3nc4ccccc4[nH]3)o2)c(Cl)c1	5.3279	0	[0 0 0 ... 0 0 0]
CHEMBL2070198	Brc1cccc(Nc2ncnc3ccc(NCc4ccc5c(c4)OCCCO5)cc23)c1	5.31876	0	[0 0 0 ... 0 0 0]
CHEMBL1958021	O=C1CSC(N2N=C(c3ccccc3)CC2c2ccc(Cl)cc2)=N1	5.31605	0	[0 0 0 ... 0 0 0]
CHEMBL1958037	O=C1CSC(N2N=C(c3ccc(Br)cc3)CC2c2ccccc2)=N1	5.31247	0	[0 0 0 ... 0 0 0]
CHEMBL92902	CN1CCC=C(C(=O)Nc2ccc3ncnc(Nc4cccc(Br)c4)c3c2)C1	5.2974	0	[0 0 0 ... 0 0 0]
CHEMBL1958019	O=C1CSC(N2N=C(c3ccccc3)CC2c2ccccc2)=N1	5.29073	0	[0 0 0 ... 0 0 0]
CHEMBL248713	CCNCc1cncc(-c2cnc3[nH]nc(-c4nc5cc(F)ccc5[nH]4)c3c2)c1	5.29073	0	[0 0 0 ... 0 0 0]
CHEMBL3327179	N#CC1=C(N)N(c2cccnc2)C2=C(C(=O)CCC2)C1c1cc2ccccc2n2nnnc12	5.284	0	[0 0 0 ... 0 0 0]
CHEMBL364623	Cc1cc(Nc2ncc(C(=O)Nc3c(C)cccc3Cl)s2)nc(C)n1	5.284	0	[0 0 0 ... 0 0 0]
CHEMBL3325474	COC(=O)C1=C(N)N(c2cccnc2)C2=C(C(=O)CCC2)C1c1cc2cc(C)ccc2n2nnnc12	5.284	0	[0 0 0 ... 0 0 0]
CHEMBL5183407	Fc1ccc(-c2ccc3c(ccn3Cc3coc(/C=C/c4ccc(C(F)(F)F)cc4)n3)c2)cc1	5.27901	0	[0 0 0 ... 0 0 0]
CHEMBL5206700	FC(F)(F)c1ccc(/C=C/c2nc(CNc3ccccc3)co2)cc1	5.27572	0	[0 0 0 ... 0 0 0]
CHEMBL29197	COc1cc2ncnc(Nc3cccc(Br)c3)c2cc1OC	5.26761	0	[0 0 0 ... 0 0 0]
CHEMBL5202630	Fc1ccccc1NCc1coc(/C=C/c2ccc(C(F)(F)F)cc2)n1	5.23732	0	[0 0 0 ... 0 0 0]
CHEMBL1958039	O=C1CSC(N2N=C(c3ccc(Br)cc3)CC2c2ccc(Cl)cc2)=N1	5.23136	0	[0 0 0 ... 0 0 0]
CHEMBL1016	CCOc1nc2cccc(C(=O)O)c2n1Cc1ccc(-c2ccccc2-c2nnn[nH]2)cc1	5.22569	0	[0 0 0 ... 0 0 0]
CHEMBL24944	O=C(Nc1ccc(Br)cc1)c1cc(Br)cc(Br)c1O	5.22403	0	[0 0 0 ... 0 0 0]
CHEMBL459729	Cc1cc(C2CCN(CCCF)CC2)cc2[nH]c(-c3c(NCCn4cc(Cl)cn4)cc[nH]c3=O)nc12	5.22185	0	[0 0 0 ... 0 0 0]
CHEMBL1365395	Cc1ccc2c(C)nc(Nc3nc(O)cc(CSc4nnnn4-c4ccccc4)n3)nc2c1	5.21975	0	[0 0 0 ... 0 0 0]
CHEMBL1958024	COc1ccc(C2CC(c3ccccc3)=NN2C2=NC(=O)CS2)cc1	5.20691	0	[0 0 0 ... 0 0 0]
CHEMBL1958217	COc1ccc(C2CC(c3ccc(C)cc3)=NN2C2=NC(=O)CS2)cc1	5.20551	0	[0 0 0 ... 0 0 0]
CHEMBL1958028	O=C1CSC(N2N=C(c3ccc(F)cc3)CC2c2ccc(Br)cc2)=N1	5.20482	0	[0 0 0 ... 0 0 0]
CHEMBL1683950	Fc1cccc(COc2ccc(Nc3cc(-c4ccccc4)ncn3)cc2Cl)c1	5.20066	0	[0 0 0 ... 0 0 0]
CHEMBL1958020	O=C1CSC(N2N=C(c3ccccc3)CC2c2ccc(F)cc2)=N1	5.19723	0	[0 0 0 ... 0 0 0]
CHEMBL4094471	Clc1ccccc1-c1nnc(Cc2nc3ccccc3[nH]2)o1	5.18709	0	[0 1 0 ... 0 0 0]
CHEMBL1683949	Cc1cc(Nc2ccc(OCc3cccc(F)c3)c(Cl)c2)ncn1	5.18709	0	[0 0 0 ... 0 0 0]
CHEMBL2070191	Clc1cccc(Nc2ncnc3ccc(NCc4ccc5c(c4)OCO5)cc23)c1	5.18709	0	[0 0 0 ... 0 0 0]
CHEMBL249304	CN1CCN(c2ccc3[nH]c(-c4n[nH]c5ncc(-c6cncc7ccccc67)cc45)nc3c2)CC1	5.18642	0	[0 0 0 ... 1 0 0]
CHEMBL3133831	CCOc1cccc(Nc2ccnc3[nH]c4ccc(S(=O)(=O)N5CCN(CCO)CC5)cc4c23)c1	5.18509	0	[1 0 0 ... 0 0 0]
CHEMBL428206	N#Cc1n[nH]nc1-c1ccc(Oc2ccccc2)cc1	5.18046	0	[0 0 0 ... 0 0 0]
CHEMBL1828867	O=C(Cc1ccc(F)cc1)NS(=O)(=O)c1ccc(F)cc1	5.15366	0	[0 0 0 ... 0 0 0]
CHEMBL1958210	Cc1ccc(C2CC(c3ccc(Br)cc3)=NN2C2=NC(=O)CS2)cc1	5.15243	0	[0 0 0 ... 0 0 0]
CHEMBL1958031	O=C1CSC(N2N=C(c3ccc(Cl)cc3)CC2c2ccccc2)=N1	5.15181	0	[0 0 0 ... 0 0 0]
CHEMBL371863	CCOC(=O)c1cn2ncnc(NCc3ccccc3)c2c1CC	5.14267	0	[0 0 0 ... 0 0 0]
CHEMBL1958222	COc1ccc(C2=NN(C3=NC(=O)CS3)C(c3ccc(C)cc3)C2)cc1	5.13371	0	[0 0 0 ... 0 0 0]
CHEMBL4869634	CC(C)Oc1cc(F)ccc1Nc1ncnc2ccc(-c3ccc(C(=O)N4CCNCC4)cc3)nc12	5.12546	0	[0 1 0 ... 0 0 0]
CHEMBL1828868	O=C(Cc1ccc(F)cc1)NS(=O)(=O)c1ccc(Cl)cc1	5.12148	0	[0 0 0 ... 0 0 0]
CHEMBL5180660	FC(F)(F)c1ccc(/C=C/c2nc(Cn3ccc4cc(-c5ccccc5)ccc43)co2)cc1	5.11976	0	[0 0 0 ... 0 0 0]
CHEMBL1958220	COc1ccc(C2=NN(C3=NC(=O)CS3)C(c3ccc(Cl)cc3)C2)cc1	5.11976	0	[0 0 0 ... 0 0 0]
CHEMBL238828	N#Cc1n[nH]nc1-c1ccc(Br)cc1	5.10237	0	[0 0 0 ... 0 0 0]
CHEMBL201772	CCCCn1c(Cc2cc(OC)ccc2Br)nc2c(N)ncnc21	5.09691	0	[0 0 0 ... 0 0 0]
CHEMBL1958219	COc1ccc(C2=NN(C3=NC(=O)CS3)C(c3ccc(F)cc3)C2)cc1	5.09474	0	[0 0 0 ... 0 0 0]
CHEMBL1958035	Cc1ccc(C2CC(c3ccc(Cl)cc3)=NN2C2=NC(=O)CS2)cc1	5.08991	0	[0 0 0 ... 0 0 0]
CHEMBL1958038	O=C1CSC(N2N=C(c3ccc(Br)cc3)CC2c2ccc(F)cc2)=N1	5.08938	0	[0 0 0 ... 0 0 0]
CHEMBL1828869	O=C(Cc1ccc(F)cc1)NS(=O)(=O)c1ccc(Br)cc1	5.08725	0	[0 0 0 ... 0 0 0]
CHEMBL1828865	O=C(Cc1ccc(F)cc1)NS(=O)(=O)c1ccccc1	5.0752	0	[0 0 0 ... 0 0 0]
CHEMBL5182590	Fc1cccc(NCc2coc(/C=C/c3ccc(C(F)(F)F)cc3)n2)c1	5.06399	0	[0 0 0 ... 0 0 0]
CHEMBL4066118	c1ccc2c(Cc3nnc(Cc4nc5ccccc5[nH]4)o3)cccc2c1	5.05552	0	[0 0 0 ... 0 0 0]
CHEMBL3325471	COc1ccc2c(c1)cc(C1C(C#N)=C(N)N(c3cccnc3)C3=C1C(=O)CCC3)c1nnnn12	5.05061	0	[0 0 0 ... 0 0 0]
CHEMBL3325476	COC(=O)C1=C(N)N(c2cccnc2)C2=C(C(=O)CCC2)C1c1cc2cc(Cl)ccc2n2nnnc12	5.04576	0	[0 0 0 ... 0 0 0]
CHEMBL1958211	COc1ccc(C2CC(c3ccc(Br)cc3)=NN2C2=NC(=O)CS2)cc1	5.03292	0	[0 0 0 ... 0 0 0]
CHEMBL394465	CN1CCN(c2ccc3nc(-c4n[nH]cc4/C=C/c4cccnc4)[nH]c3c2)CC1	5.03152	0	[0 0 0 ... 0 0 1]
CHEMBL461140	CN(C)CCOc1ccc(/C=C/c2cc(-c3cc4c(=O)[nH]cnc4[nH]3)ccn2)cc1	5.02228	0	[0 0 0 ... 0 0 0]
CHEMBL369967	CCNCc1cn2ncnc(Nc3ccc4c(cnn4Cc4ccccc4)c3)c2c1CC	5.01323	0	[0 0 0 ... 0 1 0]
CHEMBL1958033	O=C1CSC(N2N=C(c3ccc(Cl)cc3)CC2c2ccc(Cl)cc2)=N1	5.00174	0	[0 0 0 ... 0 0 0]
CHEMBL1172957	NS(=O)(=O)c1ccc(Nc2nc(N3CCOCC3)nc3[nH]cnc23)cc1	5	0	[0 0 0 ... 0 0 0]
CHEMBL462343	Nc1ncnc(Nc2ccc(OCc3ccccc3)c(Cl)c2)c1C(=O)NCCN1CCCCC1	5	0	[0 0 1 ... 0 0 0]
CHEMBL518646	Nc1ncnc(Nc2ccc(OCc3ccccc3)c(Cl)c2)c1C(=O)NCCN1CCOCC1	5	0	[0 0 0 ... 0 0 0]
CHEMBL3884319	CC1(C)C(=O)N([C@H]2CCc3c(O)cccc32)c2nc(Nc3ccccc3)ncc21	5	0	[0 0 0 ... 0 0 0]
CHEMBL5169997	FC(F)(F)c1ccc(/C=C/c2nc(Cn3ccc4cc(-c5ccccc5Cl)ccc43)co2)cc1	4.99012	0	[0 1 0 ... 0 0 0]
CHEMBL1958029	Cc1ccc(C2CC(c3ccc(F)cc3)=NN2C2=NC(=O)CS2)cc1	4.98885	0	[0 0 0 ... 0 0 0]
CHEMBL1958036	COc1ccc(C2CC(c3ccc(Cl)cc3)=NN2C2=NC(=O)CS2)cc1	4.98548	0	[0 0 0 ... 0 0 0]
CHEMBL1958223	COc1ccc(C2=NN(C3=NC(=O)CS3)C(c3ccc(OC)cc3)C2)cc1	4.97964	0	[0 0 0 ... 0 0 0]
CHEMBL1828866	Cc1ccc(S(=O)(=O)NC(=O)Cc2ccc(F)cc2)cc1	4.97757	0	[0 0 0 ... 0 0 0]
CHEMBL1958025	O=C1CSC(N2N=C(c3ccc(F)cc3)CC2c2ccccc2)=N1	4.97757	0	[0 0 0 ... 0 0 0]
CHEMBL393014	N#Cc1n[nH]nc1-c1ccc(Cl)cc1	4.95861	0	[0 0 0 ... 0 0 0]
CHEMBL1828872	O=C(Cc1ccc(Cl)cc1)NS(=O)(=O)c1ccc(F)cc1	4.95664	0	[0 0 0 ... 0 0 0]
CHEMBL245770	COc1cncc(/C=C/c2c[nH]nc2-c2nc3ccc(OC)cc3[nH]2)c1	4.92082	0	[0 0 0 ... 0 0 0]
CHEMBL113194	CCCCn1c(Cc2cc(OC)ccc2OC)nc2c(N)ncnc21	4.92082	0	[0 0 0 ... 0 0 0]
CHEMBL5192580	Fc1ccccc1-c1ccc2c(ccn2Cc2coc(/C=C/c3ccc(C(F)(F)F)cc3)n2)c1	4.91578	0	[0 0 0 ... 0 0 0]
CHEMBL1958030	COc1ccc(C2CC(c3ccc(F)cc3)=NN2C2=NC(=O)CS2)cc1	4.90553	0	[0 0 0 ... 0 0 0]
CHEMBL1828870	O=C(Cc1ccc(Cl)cc1)NS(=O)(=O)c1ccccc1	4.88372	0	[0 0 0 ... 0 0 0]
CHEMBL296419	COc1ccc(CCN2CCC(Nc3nc4ccccc4n3Cc3ccc(F)cc3)CC2)cc1	4.88326	0	[0 0 0 ... 0 0 0]
CHEMBL1958027	O=C1CSC(N2N=C(c3ccc(F)cc3)CC2c2ccc(Cl)cc2)=N1	4.88074	0	[0 0 0 ... 0 0 0]
CHEMBL1828873	O=C(Cc1ccc(Cl)cc1)NS(=O)(=O)c1ccc(Cl)cc1	4.8755	0	[0 0 0 ... 0 0 0]
CHEMBL5183228	Cc1ccccc1-c1ccc2c(ccn2Cc2coc(/C=C/c3ccc(C(F)(F)F)cc3)n2)c1	4.87484	0	[0 0 0 ... 0 0 0]
CHEMBL239895	CC(C)c1ccc(-c2n[nH]nc2C#N)cc1	4.86967	0	[0 1 0 ... 0 0 0]
CHEMBL1828874	O=C(Cc1ccc(Cl)cc1)NS(=O)(=O)c1ccc(Br)cc1	4.86774	0	[0 0 0 ... 0 0 0]
CHEMBL808	Clc1ccc(COC(Cn2ccnc2)c2ccc(Cl)cc2Cl)cc1	4.85686	0	[0 1 0 ... 0 0 0]
CHEMBL3325470	Cc1ccc2c(c1)cc(C1C(C#N)=C(N)N(c3cccnc3)C3=C1C(=O)CCC3)c1nnnn12	4.82974	0	[0 0 0 ... 0 0 0]
CHEMBL1828871	Cc1ccc(S(=O)(=O)NC(=O)Cc2ccc(Cl)cc2)cc1	4.80771	0	[0 0 0 ... 0 0 0]
CHEMBL428690	CN1CC[C@H](c2c(O)cc(O)c3c(=O)cc(-c4ccccc4Cl)oc23)[C@H](O)C1	4.80134	0	[0 1 0 ... 0 0 0]
CHEMBL1828877	O=C(Cc1ccc(Br)cc1)NS(=O)(=O)c1ccc(F)cc1	4.78888	0	[0 0 0 ... 0 0 0]
CHEMBL1958032	O=C1CSC(N2N=C(c3ccc(Cl)cc3)CC2c2ccc(F)cc2)=N1	4.78463	0	[0 0 0 ... 0 0 0]
CHEMBL393015	N#Cc1n[nH]nc1-c1ccc(Oc2ccccc2)c(F)c1	4.77989	0	[0 0 0 ... 0 0 0]
CHEMBL401930	Cc1cc(N2CCOCC2)cc2[nH]c(-c3c(NC[C@@H](O)c4cccc(Cl)c4)cc[nH]c3=O)nc12	4.767	0	[0 1 0 ... 0 0 0]
CHEMBL1958026	O=C1CSC(N2N=C(c3ccc(F)cc3)CC2c2ccc(F)cc2)=N1	4.74184	0	[0 0 0 ... 0 0 0]
CHEMBL1828878	O=C(Cc1ccc(Br)cc1)NS(=O)(=O)c1ccc(Cl)cc1	4.72262	0	[0 0 0 ... 0 0 0]
CHEMBL1828875	O=C(Cc1ccc(Br)cc1)NS(=O)(=O)c1ccccc1	4.72011	0	[0 0 0 ... 0 0 0]
CHEMBL3325472	N#CC1=C(N)N(c2cccnc2)C2=C(C(=O)CCC2)C1c1cc2cc(Cl)ccc2n2nnnc12	4.71444	0	[0 0 0 ... 0 0 0]
CHEMBL71	CN(C)CCCN1c2ccccc2Sc2ccc(Cl)cc21	4.71296	0	[0 0 0 ... 0 0 0]
CHEMBL726	OCCN1CCN(CCCN2c3ccccc3Sc3ccc(C(F)(F)F)cc32)CC1	4.70841	0	[0 0 0 ... 0 0 0]
CHEMBL1828879	O=C(Cc1ccc(Br)cc1)NS(=O)(=O)c1ccc(Br)cc1	4.70268	0	[0 0 0 ... 0 0 0]
CHEMBL199865	CCCCn1c(Cc2cc(OC)ccc2Cl)nc2c(N)ncnc21	4.69897	0	[0 0 0 ... 0 0 0]
CHEMBL1828876	Cc1ccc(S(=O)(=O)NC(=O)Cc2ccc(Br)cc2)cc1	4.69186	0	[0 0 0 ... 0 0 0]
CHEMBL1829273	O=C(Cc1cccc(Br)c1)NS(=O)(=O)c1ccc(F)cc1	4.68931	0	[0 0 0 ... 0 0 0]
CHEMBL205652	Fc1cccc(COc2ccc(Nc3ccncn3)cc2Cl)c1	4.67778	0	[0 0 0 ... 0 0 0]
CHEMBL3325480	CCOC(=O)C1=C(N)N(c2cccnc2)C2=C(C(=O)CCC2)C1c1cc2cc(Cl)ccc2n2nnnc12	4.64397	0	[0 0 0 ... 0 0 0]
CHEMBL1828882	COc1ccc(CC(=O)NS(=O)(=O)c2ccc(F)cc2)cc1	4.62986	0	[0 0 0 ... 0 0 0]
CHEMBL1829274	O=C(Cc1cccc(Br)c1)NS(=O)(=O)c1ccc(Cl)cc1	4.62967	0	[0 0 0 ... 0 0 0]
CHEMBL4446681	CN(CCc1ccc(-c2ccccc2)cc1)Cc1cn(C)c2ccc(C(=O)Nc3ccc(F)cc3)cc12	4.61979	0	[0 0 0 ... 0 0 0]
CHEMBL488646	COc1cc(C2=C(c3cn(COC(C)(C)C)c4ccccc34)CNC2=O)cc(OC)c1OC	4.60206	0	[0 0 0 ... 0 0 0]
CHEMBL1828884	COc1ccc(CC(=O)NS(=O)(=O)c2ccc(Br)cc2)cc1	4.60154	0	[0 0 0 ... 0 0 0]
CHEMBL1829271	O=C(Cc1cccc(Br)c1)NS(=O)(=O)c1ccccc1	4.57955	0	[0 0 0 ... 0 0 0]
CHEMBL1829275	O=C(Cc1cccc(Br)c1)NS(=O)(=O)c1ccc(Br)cc1	4.56257	0	[0 0 0 ... 0 0 0]
CHEMBL91	Clc1ccc(COC(Cn2ccnc2)c2ccc(Cl)cc2Cl)c(Cl)c1	4.56177	0	[0 1 0 ... 0 0 0]
CHEMBL1829272	Cc1ccc(S(=O)(=O)NC(=O)Cc2cccc(Br)c2)cc1	4.55455	0	[0 0 0 ... 0 0 0]
CHEMBL1828880	COc1ccc(CC(=O)NS(=O)(=O)c2ccccc2)cc1	4.53655	0	[0 0 0 ... 0 0 0]
CHEMBL238617	N#Cc1n[nH]nc1-c1ccc(F)cc1	4.50031	0	[0 0 0 ... 0 0 0]
CHEMBL246167	FC(F)(F)c1c[nH]c(-c2n[nH]cc2/C=C/c2cncc3ccccc23)n1	4.48505	0	[0 0 0 ... 0 0 0]
CHEMBL5172914	Cc1ccc(-c2ccc3c(ccn3Cc3coc(/C=C/c4ccc(C(F)(F)F)cc4)n3)c2)cc1	4.45942	0	[0 0 0 ... 0 0 0]
CHEMBL453336	COc1cc(C2=C(c3cn(COCc4ccccc4)c4ccccc34)CNC2=O)cc(OC)c1OC	4.4437	0	[0 0 0 ... 0 0 0]
CHEMBL1683952	Fc1cccc(COc2ccc(Nc3cc(-c4ccsc4)ncn3)cc2Cl)c1	4.4437	0	[0 0 0 ... 0 0 0]
CHEMBL240093	Cc1ccc(-c2n[nH]nc2C#N)cc1	4.43771	0	[0 0 0 ... 0 0 0]
CHEMBL4095623	c1ccc(Cc2nnc(Cc3nc4ccccc4[nH]3)o2)cc1	4.43297	0	[0 0 0 ... 0 0 0]
CHEMBL245966	CCNC(=O)c1cncc(/C=C/c2c[nH]nc2-c2nc3ccc(OC)cc3[nH]2)c1	4.4318	0	[0 0 0 ... 0 0 0]
CHEMBL488811	COc1cc(C2=C(c3cn(COc4ccccc4)c4ccccc34)CNC2=O)cc(OC)c1OC	4.4318	0	[0 0 0 ... 0 0 0]
CHEMBL1828883	COc1ccc(CC(=O)NS(=O)(=O)c2ccc(Cl)cc2)cc1	4.42102	0	[0 0 0 ... 0 0 0]
CHEMBL4068254	c1ccc(-c2nnc(Cc3nc4ccccc4[nH]3)o2)cc1	4.39794	0	[0 0 0 ... 0 0 0]
CHEMBL113690	CCCCn1c(Cc2cc(OC)c(OC)c(OC)c2)nc2c(N)ncnc21	4.39794	0	[0 0 0 ... 0 0 0]
CHEMBL4083493	Clc1ccc2nc(Cc3nnc(-c4ccccc4Cl)o3)[nH]c2c1	4.34008	0	[0 1 0 ... 0 0 0]
CHEMBL4074782	Cc1ccccc1-c1nnc(Cc2nc3ccccc3[nH]2)o1	4.32975	0	[0 0 0 ... 0 0 0]
CHEMBL4087921	c1ccc(OCc2nnc(Cc3nc4ccccc4[nH]3)o2)cc1	4.28067	0	[0 0 0 ... 0 0 0]
CHEMBL4102942	Clc1ccc(-c2nnc(Cc3nc4ccc(Cl)cc4[nH]3)o2)c(Cl)c1	4.27901	0	[0 0 0 ... 0 0 0]
CHEMBL269528	N#Cc1n[nH]nc1-c1ccccc1	4.27165	0	[0 0 0 ... 0 0 0]
CHEMBL3133826	CCOc1cccc(Nc2ccnc3[nH]c4ccc(S(=O)(=O)N5CCOCC5)cc4c23)c1	4.26122	0	[1 0 0 ... 0 0 0]
CHEMBL4102214	c1ccc(C(c2ccccc2)c2nnc(Cc3nc4ccccc4[nH]3)o2)cc1	4.23958	0	[0 1 0 ... 0 0 0]
CHEMBL1683957	Cc1c(Nc2ccc(OCc3cccc(F)c3)c(Cl)c2)ncnc1-c1ccccc1	4.18709	0	[0 0 0 ... 0 0 0]
CHEMBL3133834	COc1cccc(Nc2ccnc3[nH]c4ccc(Br)cc4c23)c1	4.04001	0	[1 0 0 ... 0 0 0]
CHEMBL521155	Nc1ncnc2c1ncn2CC(=O)c1c[nH]c2ccccc12	4.02228	0	[0 0 0 ... 0 0 0]
CHEMBL364272	Nc1ncnc2[nH]c(Sc3cc(Cl)ccc3Cl)nc12	3.92082	0	[0 0 0 ... 0 0 0]
CHEMBL190654	CCCCn1c(S(=O)(=O)c2cc(OC)c(OC)c(OC)c2)nc2c(N)ncnc21	3.50864	0	[0 0 0 ... 0 0 0]
